# Supplementary material for: iRNA-PseColl: Identifying the Occurrence Sites of Different RNA Modifications by Incorporating Collective Effects of Nucleotides into PseKNC
Source: PubMed Central journal article supplement — Mol Ther Nucleic Acids. 2017 Mar 29;7:155–63. doi: 10.1016/j.omtn.2017.03.006 (PMC5415964; doi:10.1016/j.omtn.2017.03.006), 2017-03-29
Supplement: mmc1.pdf [file mmc1.pdf]

OMTN, Volume 7

## **Supplemental Information**

### **iRNA-PseColl: Identifying the Occurrence Sites of Different RNA Modifications by Incorporating Collective Effects of Nucleotides into PseKNC**

**Pengmian Feng, Hui Ding, Hui Yang, Wei Chen, Hao Lin, and Kuo-Chen Chou**

## Supporting Information S1. User Guide for the iRNA-PseColl predictor

To maximize users' convenience, a step-to-step guide of how to use the iRNA-PseColl predictor to identify the occurrence sites of the three different types of RNA modifications is given below.

**Step 1.** Open the iRNA-PseColl web-server at <http://lin.uestc.edu.cn/server/iRNA-PseColl> and you will see its top page on your computer screen, as shown in **Fig.S1**. Click on the [Read Me](#) button to see a brief introduction about the platform and the caveat when using it.

**Figure S1.** A semi-screenshot for the homepage of the proposed iRNA-PseColl predictor, which is freely accessible at <http://lin.uestc.edu.cn/server/iRNA-PseColl>.

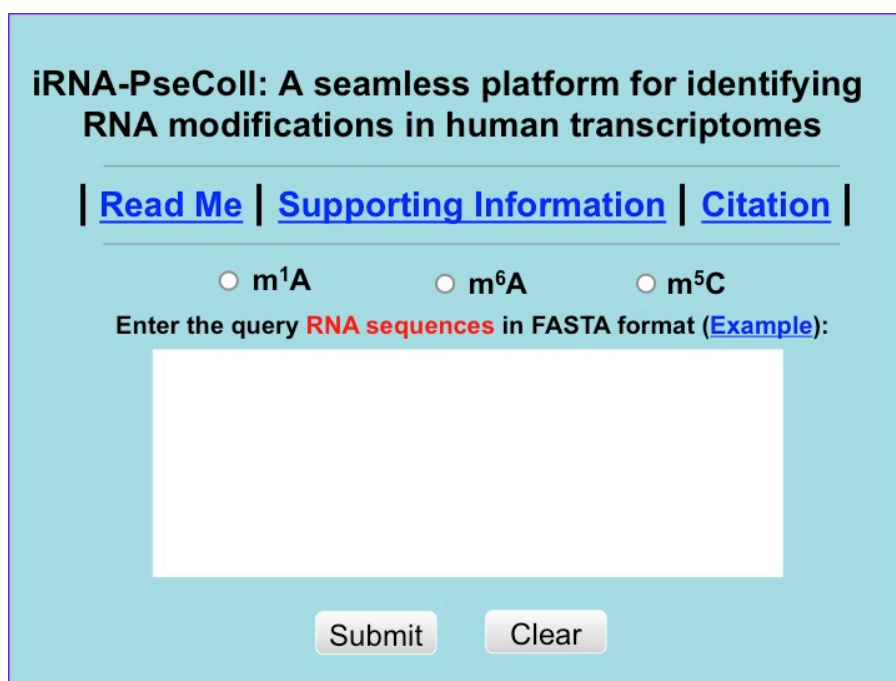

**iRNA-PseColl: A seamless platform for identifying RNA modifications in human transcriptomes**

| [Read Me](#) | [Supporting Information](#) | [Citation](#) |

m<sup>1</sup>A       m<sup>6</sup>A       m<sup>5</sup>C

Enter the query **RNA sequences** in FASTA format ([Example](#)):

    

**Step 2.** Select which type of RNA modification you are concerned with. For example, if you are interested in the type of m<sup>1</sup>A, check the 1<sup>st</sup> button “m<sup>1</sup>A” on; if type of m<sup>6</sup>A, check the 2<sup>nd</sup> button “m<sup>6</sup>A” on; if type of m<sup>5</sup>C, check the 3<sup>rd</sup> button “m<sup>6</sup>C” on. Then, Either type or copy/paste the query RNA sequences into the input box at the center of **Fig.S1**. The input sequence should be in the FASTA format. For the examples of sequences in FASTA format, click the [Example](#) button right above the input box.

**Step 3.** Click on the [Submit](#) button to see the predicted outcome. For example, if you use the three query RNA sequences in the [Example](#) window as the input and select m<sup>1</sup>A type, after 15 seconds or so, you will see the following shown on the screen of your computer: (1) The 1<sup>st</sup> query sequence contains 14 A nucleotides, of which one is predicted to be for the m<sup>1</sup>A modification and it is at sequence position 21. (2) The 2<sup>nd</sup> query sequence contains 19 A nucleotides, of which none can be for

m<sup>1</sup>A modification. (3) The 3<sup>rd</sup> query sequence is only 25-nt long, too short for the current platform that requires a query RNA sequence with at least 41-nt long. However, if using the same first two query sequences but checking on the 3<sup>rd</sup> button “m<sup>6</sup>C”, you will see the following: (1) The 1<sup>st</sup> query sequence contains 2 C nucleotides, none of which can be for the m<sup>5</sup>C modification. (2) The 2<sup>nd</sup> query sequence contains 5 C nucleotides, of which none can be for m<sup>5</sup>C modification either. All these results are fully consistent with experimental observations.

**Step 4.** Click the [Supporting Information](#) button to download all the Supporting Informations mentioned in this paper.

**Step 5.** Click on the [Citation](#) button to find the relevant papers that document the detailed development and algorithm of the current platform.

**Supporting Information S2. The benchmark dataset  $\mathbb{S}_{\xi=20}(\text{m}^1\text{A})$  for m<sup>1</sup>A modification in RNA.** It contains 6,366 positive samples whose centers can be m<sup>1</sup>A modified as confirmed by experiments, and 6,366 negative samples whose centers cannot be m<sup>1</sup>A modified. All the sequences included are 41-nt long with the adenosine (A) located at the center.

**I. Positive subset  $\mathbb{S}_{\xi=20}^+(\text{m}^1\text{A})$**

>P1  
GGGCCAGGUGCCUGAGAUUGAUGUCCAUCCUACCUGCCUG  
>P2  
CUCGCCGCAGGUCUGGCUGGAUGAAGGGCACGGCAUAGGUC  
>P3  
CCCACAGCUGCUGGCGCCCGAGACCGCCUGCGCCCCAACG  
>P4  
CUCCUGCAGGAACUUGUAGAACUCGGGGUCUCUGUCCUUCA  
>P5  
UAGCUCGCAGGCACUGCCGUAGGUGACACCGUCGCUGCCAC  
>P6  
ACAGGGCUGGUGGAGAAGUCAGCGGGGACGUGGAUACCUU  
>P7  
UUUUGGCGAGUAAAGGCCAUAGCGAGAAGGAGGUUGCCGAC  
>P8  
GCACCCGGGGCUCUUGGCGCACCGCGCAGCGUGCCCGCG  
>P9  
CUCGAGCGCUCUCGUCGCUGAUCUCUGUAGUAAUGACUUUU  
>P10  
AGCAACUUCUCAUGAGGAGAUUUACGGAAGCAGGAGGAG  
>P11  
CUGAGCGAUCUCCCGGCCCGACAUGCCUCCGUCAGCCGAG  
>P12  
CAGGGUCACCAGUGUGUGAAAGAUCGGGGCAUGCCGGCCAC

>P13  
CUCCUGGUCACUGGCCAAACACCCAUCCUCACCCCAGCCAC  
>P14  
GGGGUGCGUGACACAGGAGGAUGAGUUGAGCUGGCUGGUGG  
>P15  
GACGUGGAACAAGUCCCCAAAGAGCGUCCUUGUCAUCAAGA  
>P16  
UCCAAAUGCGCACGAGGAGGACACUGCGGGGGCACCUGGCC  
>P17  
ACCGAGCCUCGCCGGCGCGCACACUGCCCAGCGCCCGCGG  
>P18  
ACAAGACUCAUACUCACUGAAGAGCAUCUGCCCAGGGCCG  
>P19  
UCACGGGAAGUUGUUAUUUAAGAUGGCAGUUAUUACGAAG  
>P20  
CUCCUCCUCCACUCCAGCCACUCCUCGCACCUGAGAGGA  
>P21  
GACCUCUAUCUAACCCGCACAAUCAACCCGGCUGAUGAUCU  
>P22  
GCUGCGCCCCGCGCCUGCAGAGCCUCAACCUCACCGGCAAU  
>P23  
ACUUUGAUCCUUUCUUGCAAACACUGCUCCUGUAGAAUCA  
>P24  
CUCUCUCUGCAGCCGCUCAAACUCCUCUCGAAUUUCAGCAG  
>P25  
UCAUGACAUCUACAGGGAUGACCGUCUCCAUUCCUCUGCU  
>P26  
UGGCUCAGCGCCGCGGGCUCAGGGGCCCGGACAUCGCGCAG  
>P27  
CUGCAGCUGGUGGGCUGCUGACAUGGGGGGUGGGAUGGCC  
>P28  
CUAACAGCCACAGGCUCCCACAGCGCCUGUCCCCACACC  
>P29  
GACCGAGAGAGAGAGAAAAGAGACAAAGCAAGAGAGAGUGA  
>P30  
UUAGCGCCCCACCGCCGUGGAGUUCGUACCGCUUCCUAGA  
>P31  
CGCGCCCGCCGACAGGAGCGAAGUCGCCUCCUCCCCGCGGC  
>P32  
AUCAGAAUACUGGAGACGAGACCACGAGAUUGAUGAGUUUG  
>P33  
GGAGCAGCCGUUCCGCAUCGAGCUCAUCCAGGGCAGCAAAG  
>P34  
GGUCACGGUGGAGGGAGAGGAGCUGAACCACGAGCAGGAGA  
>P35  
CAUCCAAUGCAGGGUCGGGCAGUGGUUUUAAUGGAGGCUUU  
>P36  
CCUCCUGCUGGCUCUCGCCCACCAACCAAGUGUUACAAGCC

>P37  
AGCAUGGUGGGGACGGCUGGAGGGUGGAGGAGCUGCCUGGA  
>P38  
GGGGUGCGGGUCUCACGCUCACCGCAGCAGCAGCACCACCU  
>P39  
GCUCGCCCCGCCUACUCCUUACGCCUCUGCUGCCCCGCGAC  
>P40  
CUCAGGCGGCUGCGGCUGCUACGGCGGCAGCAUGCUAGGGGA  
>P41  
CGAUUGAGGAAGAGCGAGCCAGCGCCCGGAGCAAGCGGAGC  
>P42  
UGCACACGGAGUACAUGUAGAUCGGCAUGUCAUUCAUGAUG  
>P43  
GCGAGCGCGGUGCUUUUGGGAACGCGGGACGGGCGAUCUGC  
>P44  
GCAGAGUCAGCUGCAGCGUGAGCAGGAGGAGCUGCUGGCC  
>P45  
GGUGCAGACGUUGCGAGGCGAGGUGGCUGACCUGGAACUGC  
>P46  
GUCACCAGACUGCCGUGAGGAAACAGUACCCGUGCACCCGCC  
>P47  
AGGUAGGCAGCUCUCAUGGCACAAAGAGGCAGGCCGGGGU  
>P48  
GGCUGACGUCAGGAGCCAAGAUGGCGGCGGUGGUCGCCUC  
>P49  
AGGCGGAGUAGGACGCGGACAGCAGGGGCCGCACAGCCACC  
>P50  
CUCGGUGCCGUCCUGCGCAGACUCUCCCGUCCACGGAGGC  
>P51  
GCAGGCGCCUCAUUAAGGUCCAGGCACAGUCCAGCUGCUGA  
>P52  
GCGGGUGGGGAACAUGUCUGAGUCGGAGCUCGGCAGGAAGU  
>P53  
UAAAGAAGGUAAGUGAGAAAACAAUCCUAAUCCAAAACCA  
>P54  
GCCACAAAGCCCUGGAGAGCAGAGGUAGCCACAGGGACAAU  
>P55  
GGCCGCAGGACCGGGCGCGGAGCCUCGCAGGGUCGGGCUCG  
>P56  
UUAUCCCCUCCCCGGAGGAAGCGGCGCCUUCUCGGUAGC  
>P57  
GGACGAGGAGGACCUGGUGGACUCGCUCUCCGAGGGCGACG  
>P58  
UCUGCAGCUGCGUGGAGGAGAGGGGUGGCGUGCCGGGCUGC  
>P59  
CAGCCGGGCCCGUGAGAAUCAGCGCGAGGCGCUUUGAAAAC  
>P60  
UGAUUCUGUGUUUGGCCCAAUGCAGCCUGUCCUGCGCUUC

>P61  
ACCUAUCAAACCUUCUGAGAAAUGACUCGGACUCUUCGUG  
>P62  
GGUAGAGCGGCUUGGGGAAGACCCUUUCCUAUGCUUGGAUG  
>P63  
AGAAGACUAUGAGAAAGUGAAGUUGCUGGAGAUCAUGGCAG  
>P64  
GUUCGCGCUUCUGAGCGGCCAGCUCCGCCGCCGAGCGAGG  
>P65  
GCGCCGCGCCGGCCCGCCUCACUCCCCGAUUUUAGCCAAG  
>P66  
UGAGAGAGUCCGGGAGCCCGAGCUUGAGGUGAGAAAGGUUC  
>P67  
CAUGAGGCGGACAGGCCCCGAGGAGGAGGCCUGCGGCGUGU  
>P68  
CGCUCAUGCUGGGGGUAGACAGACGGGCCGGCGGGCAGAGG  
>P69  
CAGUUCAGUGGCACCUGAUUAGCUCCGCUGGGCGCGUCCCC  
>P70  
CGGCGACGGCAGCGGGACGUAGGUGCUGGACGCGGGAUGCA  
>P71  
AGCCAUCUCUCUGGCCAAGACCACUUUCGACGAGGCCAUG  
>P72  
UGAGCUCAAUCUCCUCCUCAAGAGCUGCUCAGUGGUCCGC  
>P73  
UCUUCCUCUCCAGCUUAUCACACAGACUUUCAGCCACCAC  
>P74  
UCAAGGGGCAGCCAGCGAUCAUUGAUGGGGAGCUCUACAAU  
>P75  
CCUCCACCUCUCCUCCACCACCAGCAGCUGACUACCCAAC  
>P76  
CAGGCGAGGGGUUUUGGGGACGUCUGUCUCCGGCGGUGG  
>P77  
GAAGGUGCGGGUCUGGGGGAUAGCGGAAAACACAGAACG  
>P78  
ACUCAUGCCGCUGCCGCUUGACUGGAACCAGCGGCAACUCU  
>P79  
UGAGCAGGGAGCAGGCUCCCAGGCAGGCCCCCAUGGCGGCG  
>P80  
GCAGCAAGACGGACUCGUGGAGACGCGCCGCCGCCGCCGCC  
>P81  
CAAGGGGAUCCAAACACAGAGAGAUCCGGCAGAGUGACG  
>P82  
CAAUGGAUGACAAAAGAAGAACGGAGUCCCAAGCCCUGC  
>P83  
AGGGCAUGAGCGGUCCAUUACGCAGAUUAAGUAUAACCGC  
>P84  
UGUCUCCCACAGUCCUCUGAGCCUUGGAGUUUAUGAAGC

>P85  
AAAAUUUUUAGCAGCCUUCGACGACGCAGUGGAAGAACGAG  
>P86  
UUGUGGGCUUCCUGGCUCACGGGCCCUCCACAAACUGU  
>P87  
UGACCUGCAGGUUCCGGGUGUAAGGUGCAGUUUCUCUUA  
>P88  
GCAGCCUUCUCCAAAGCCAC AUGUAAAGACUUGGUUAUGUU  
>P89  
GGCCAGAAUUUCCACCUCUAGGAGGUGGUGGUGGCAUAGG  
>P90  
AGGAUCCCAAGGCAACAACAUGACAAAGGUAGCAAUGAU  
>P91  
GCUUCUUCACUUACAAGUCAGCAUACACUUCUGAAAUGAG  
>P92  
GUUCAGUGGGGAGGAAGGGGAGAUUGAAGACGACGAGAGUG  
>P93  
GAUGGAGCUGCGGAGCCCUGACCAUCCCCGAGCAGAAUACC  
>P94  
UAAGGGAAGAUGGAGACAAUCUGGAGCAGCAGCGGCGCUA  
>P95  
UUUCCAAGGCUGUACAGAC AUGGCGGCGCUUUUCGGAAG  
>P96  
CGUUCUGAAGCGGCGGCCAGAGAAGAGUCAAGGGCACGAGC  
>P97  
AAAGUACACCCCUCCACCUCACCACAUUGGCAAGGGGGAGC  
>P98  
CGCUUCUCGGGCGCUGCAGCAUCUGGACCCGCCGGCGCCGC  
>P99  
CGGGGCGAUGACCCCGAACC AUGGACUCAGUCUCGACUCCA  
>P100  
CCAGCCUCGGCCGUAAAGUGAAGAGACCGGACCAGCUUCA  
>P101  
CGCCAAUACUGACAUCAAAAGAACACCACGGGGUUAACAGGA  
>P102  
AAGAAACGGGGUAUCCCGAGACCCAAGCGGCUAGCAGAGGG  
>P103  
UCCCGCUCCCGCCGCGCAGGGUCCAACUCAAAACAGCG  
>P104  
UCCAUGUCCUCCUCUGGGCACUCCUCCUCGUUGCCAGCUC  
>P105  
AGAGCAGCCUCAGGGGUCAAAUCGCCUUGUGGGGGUAG  
>P106  
AGAGCAGUGCUAGCCCCGUC AUGGCGGCGACGGCGGCGGGG  
>P107  
CACCGCGGUGCGGACCCAGCACGCCUGGGCCGGGGCUGCA  
>P108  
AGAAGGAGCGGGAGAAACGCAGCCAGGACCUGCAGAAGCUG

>P109  
UGAGAACAACAACCGCUUUGAGGAGUAUGAGUGGUGUGGAC  
>P110  
GGAGAGUCAGCAAGGAAGAGAACGCGCAAUACCAAGAAAC  
>P111  
ACAAGUCUAGGUCGCCGUCCAGAGCGCCAUGGCCGCGCCCG  
>P112  
UGGCUGUGGACUCCAUGGCCAUCGUUCCCCUGAGGUGGCGA  
>P113  
UUCCACCUCAGCCCUGGGAUUUUCUUCUCCAGACUCG  
>P114  
UCUCUCACUGUUGUUAGGGGAUCCUGAUGUAGAAACAGAAA  
>P115  
ACACGCGCAGGCCCCACUCCAGCCGCGACUCCGGCCCCUGC  
>P116  
CCUGUAGGGGUGAAAGGAGCAGGGACCGGCGAUCUAGGGGG  
>P117  
UCCUCCCCUCCUUGCAUGAUGGAAACACCAUGGCUGCGG  
>P118  
AAAGGUCACUUACCAGCAUCACUUGUCCAUUGGACAAGGA  
>P119  
GAAGCAGGGAGGGUCCUCCAACACCAGCACGCGGCAAGAGA  
>P120  
AGUUCUGGAGUCUAAACACAAGGCCGCCGCGCCGUUAGCG  
>P121  
ACUCAAGCCACGCUGGAGAACAUCACCAACCUCGGCCCCG  
>P122  
CCCACGUAGUAACGCAGAUAAAAGUCACUCUCCAUGGCUC  
>P123  
AGGGAGGUUUCGAGCCCGGAAGGUCCGGCGCCAGAGCUAA  
>P124  
GGAAACCCUUCGAGAAAACAGCAACAAGCUGAGCUGCUGU  
>P125  
GCUGGAGUUCGUGCUCAUCCACCAGCGCUGGGUGUUCGUGU  
>P126  
CGAGCGGCCGGGCCUCGACUACGGCGGCUACGAGCCCAUGG  
>P127  
CCGCUACCACGUCCCCUUCGAUAUCCACAUCGCCUCUUCA  
>P128  
CCGCCACGUCCUGGGCGGCCAAGGUCUCCAAAUUGAUCUC  
>P129  
GAGGUACCGCAGUCUCUCCACCUGCUUUGAAACCAGCGCG  
>P130  
UCCGGGUUGGGAGAGACAGAGGAUCAGGCGAGAAGGAGC  
>P131  
GUCCCCGUCACUGACUCGGAUUUCUUGGUCGACAUCUUGA  
>P132  
GUUAAGUUACUUGAACUUUAUAUGGGUCUCCUGUAAUCCU



>P133  
AAAGCGUCGUU AACUCCUCC ACCACCACCGCCGCCACCACC  
>P134  
CGCCAGCGCUAGGCGCACUC ACCGCUCUGACGGGUGCAGAC  
>P135  
GCCUCCUGAAGUUCUUCGGC AGCGGCUUUCGUUUUAGACU  
>P136  
GCAUACGGGAGCAGCAGCUC AGGCUCCUCGGACGAGGAGGA  
>P137  
AUUAUAGACUGGCCAGGUAC AGAAGGCAGGUUGGCUGGCCA  
>P138  
CCGGUGAGGGCGGCGAGAGG AGCCCGCUACGAGUGCCCUA  
>P139  
AUGAGGGGUGUUUUUUGGG AGGGGAGGGGCGGGAUUUGGG  
>P140  
UCGAAACUAGGAGAAAUAAG AAUGGCUGUAGAGGAACUUCA  
>P141  
GCGGGCACGCCCCGCGGACC AUGAGCGUCCCCAGCUCCGGG  
>P142  
AUGCUGGCCUUAGCCCGUGC AGAUCUGGUAACCACCAUCUU  
>P143  
GGAAGACAAUGACUAAGCAG AAUCGUAGCCGAGAAAGUGC  
>P144  
CAAGUACUUGACGGCGCGAA ACUCCUCGCUGGCUGGUGCCG  
>P145  
CAAGACUGCGAGCUCCCCGC ACCCCUCGCACUCCCUCUGG  
>P146  
GCAGGCGGCCUGGCCGAGGA AGUCACGGGAGAUCGAGGGCU  
>P147  
CUAGUUUGAGGAAGAAAUG AAGAAAUUGGAGGAGGUGCAG  
>P148  
CCAUCUCCGCCGCUAUUACC ACUGAACCCGGACCCCUACC  
>P149  
UCAAAUAAGAUCAAAGUGUA AGCGGGAGGAGGGGCGCAGGG  
>P150  
GCCAGCAGGAGCGAGAGUCC AGUUAGAUCUGAGCCGGAGAG  
>P151  
CGACCCGCAACAAUGAAGGG AAAAGAGCGCUCGCCAGUGAA  
>P152  
GGGUGGGGUUUCCUCCGC AUCUCCACGGUUCCAACUCCA  
>P153  
UCCCCGCCAGCCCGGCCCGC AGUCGCUCCUCCAGCCUAGC  
>P154  
GUCCGUGGAAAUGAAACUGA AAGUCGCCGCUGCAGCUGGAA  
>P155  
UCCGCAAGAACAAGCGUCGG AGGGGCUGUCCCAUUCUCUGA  
>P156  
GAAACUGAUCCUUGCUGAAG ACGAUGAGGAGGCAGGUCUUC

>P157  
GCGCAGGAGGAGCCGGACAAAGAGGGGAAGGAGAAACCUCA  
>P158  
CUCCCACAGCUCCCACGGUAACUCGAGGGCUCCUUCUCGUC  
>P159  
CCUAAAUCUGUCCAAAGCAGAGGCAGUGGAGCUUGAGGUAA  
>P160  
CUUGCCUGAUCUGAACUUGAAGCAGCAGUUUCAGGUGGUAA  
>P161  
CGCGCGUCGGACCGUCCUUCAGUCCAUCAGGCGCACGCCU  
>P162  
GCCGGAGCUGGAAGAGGAGGAGGAGGAGAGGGCGGGGAA  
>P163  
CUUUAUUCGGGCAUCGCGGACGCCGGUCUUAAGAAAGCAG  
>P164  
GAGAGCGGGAGCAGCUGCGGAUCCCUUAUGAAGUGCCCGGA  
>P165  
GAUGAAGGACGGCAAUGGGAGCGGAAGAAGGUGAGCAGCG  
>P166  
UUCACAAACUACAGGGAUCCAACACUGGCCCGGAAGGCCCU  
>P167  
UGGGGAGGGGUCCGAUAGAGGAGCCCCACUCUCUCCUCC  
>P168  
CGAAGAUUCGCCAUGGAUGAGGAUGGGGACGGUGAGGACA  
>P169  
ACCAGUACCACAUACCCAGUAGGUAAUAAGGUGUCCAGCAG  
>P170  
CAGCGACCGGGUGUCCGGGGAGCGCCACGGCGCCAAGGCUG  
>P171  
UGUCGGGGUGGACCUGCUUCAGCACCUUGUACACGUAGAUG  
>P172  
CGGGGAGUGGGUCUGGGUGGAGGGAGAGGCCCCCGCUGGUA  
>P173  
AAAACUCACUGAAGAGCUGGAAGGGUGGCAAGGAGGAGGCA  
>P174  
CCCUCSCCGACGGCGAUGGAGGUGGAGGCGGUGGUGGAGA  
>P175  
GAGGGCGCAAGGGGCGGGGAGCGGGCGUGCGUGUGUGUC  
>P176  
UCGGAACUGGACAUCAAAAACGAAGACGAUGUGAAAUCGU  
>P177  
GCCACUGGUUAAGAAGGAUAGUCAGGAAUGUUUUUACCAA  
>P178  
ACGGGGGUGGGGUGGGGAGACAGGUGUCCUUCUAAAAUAC  
>P179  
CUCCACUGGGCUUCCACAAAGGCAAUGAUGCGCAUCUUGU  
>P180  
GGCACUUGGCCAGACUUGAAGGCCAUGGGGCAGAUGGGGC

>P181  
AGGUGGGGCAGAUAGAAUGGAGAUGGCAAAGAUCUCUUUGG  
>P182  
CCCCAGGACAGUUUUACCGCAUUCGUGCACUCCCGAUUCC  
>P183  
GGACGUGCACCCAGAGGACCAGGCGGCGGUAAGAAAAAGCG  
>P184  
CCCGAUUUUGAGAAAGGCUGAGUUGCAGGCCAGGUCAGGG  
>P185  
CGUCCGCCGCGCCUCGGCCAAGGUGAGCUCCGCCCGGCCCA  
>P186  
UAAUGGCAGCAGAACCACUGACAGAGCUAGAGGAGUCCAUU  
>P187  
GGGCGGUUGGUUAGAUGCGUAGCGGUAGUAUGCGAGCUCA  
>P188  
GUGGCCUGGCUCCAGGGAAAGGACUCAGCUCAGGGCAGGG  
>P189  
GACGGGGAAGGAAGAUGGCGACGUCGGGGGCGAACGGGCCU  
>P190  
AAAGGAGAAAAGGGAAAAGCAGAAAGGAAAAAAGGAAGAG  
>P191  
AGGAUCCAGCUGGUUGAAGAAGAGCUGGACCGUGCUCAGGA  
>P192  
UGAGUACCUACGCUAUCAGGAGGCCUGAGUGAGCUGGCCA  
>P193  
GCCCCCAUCUGGUCGGUGGAGUCUGAUGACCCUAACUUGG  
>P194  
GGCAUCCUGAAUCCACGCAUCUGCUGGAAACGAGCCGUG  
>P195  
AGGACAGGGAGCCAGCAGGAAGGUGGAAGGAGGGCAGGCCA  
>P196  
CUCACACUAAAACGGCGUAGAUGGCAACCCCCACCCCCAC  
>P197  
CCCUACCCUCCUCCAGGACAUGAACAAAGCUGAGUGGAGGC  
>P198  
CCGUAAAUGAGCGAGUCCAGAAAGCCGCCCGCCUCCAUIAC  
>P199  
UGGUCUGUACUACAUCAACAAGAUCUCCUCCACCCUGUACC  
>P200  
CACCACCCCGCCAGCCCACGAUGUCACCUCAGCCCCGGACA  
>P201  
ACCCUCCCCUCUUCUCUAGACUUAUUUCAUCCUCCCGC  
>P202  
CAUACCACAGUGGAUGAGGACUGGCUCGCGUGUGGGCGGG  
>P203  
GGUUCACCAGUGCGCGCCCAGAAACCGGCAAAAUGUCCC  
>P204  
CCACCCUCUUGGUUAACCCUACUUCUCCUCCUCCUGUCCAUG

>P205  
CGUGGGCGCGCACUGGUGGAACCAGCAGGUGAGGUCAGCCG  
>P206  
UGUAGGUCUCCUGGCCGUGCAGCGUCCGGCCCGUACGAUAC  
>P207  
CAGCCGCAUUGACAGGCUGGAUCAUGUUACAGCCACCGCCA  
>P208  
GAAGGAAGACGAAGUGCGUGACCCGACCGGCUGUGGUGUUC  
>P209  
GGCUGGAGCUGGUUGGUCCC AUUUGCUGCGGCGCCUACAUG  
>P210  
GGACCGACCCCAUGGCUGAGAAUAUGACGGCAAGAGGAACA  
>P211  
ACAUGCGCAGCAUGAUGCAGACGCUUGCCCAGAACCCCGAC  
>P212  
GCGGCGGCAUGGCCGAGCCGAGCGGGGCCGAGACGAGGCC  
>P213  
CCUUGGGGCGCAGCAUGCCUACGGUUCCUAACCCUGGGCUU  
>P214  
CCCGGUCACAGGCCCCUGCCACCCACCACUACCGCCAACAC  
>P215  
GGCGAUGACCAGAGCCGGCAAGGCGGGGCUCCUGAUGCUGG  
>P216  
CACAGUCACCACCCACCCCAUCAUCAGCAUCAAGUCAGAAC  
>P217  
AGAGCUGGAGCGCGAGCUAGAGGCUCUACGCGUGGCGCACG  
>P218  
AGGACUCUCCUAAACGUCCCAGGAGGCAGAAAACCCUGAA  
>P219  
UGCUAUCAAGGCUGCUGCCAAGAGUGCUGCCUGCAGGUGA  
>P220  
CCUGAGCUGGGCCAGCAGGAAGUGGCGGCAGCAAGUCCGGC  
>P221  
GCCUAGUGAUCGAUACACUGAAGGAGGUAGAUGAAACUCGU  
>P222  
AUGAAGAUAUAGCCAAAACCAUUCGCAGGGUCCGAUCCGGA  
>P223  
UGCUGGGGGCUCAGGUACGCAUUGC UUCCAGAAUCCUGC  
>P224  
AGAGGUGUGGCAAGCAGAGCACCU CAGAACUCAGGCGUACU  
>P225  
GCCUGGGCUCUCACCAAUGAAGAGAAUUGUCCUUUAAGCCA  
>P226  
GUCCCGCGCUCGCUCCGAAUAUAUACCCUCAUCCGGGGGGC  
>P227  
ACAGACAGAGCUC CCCUGCCACUCCAUGAGGCGCUGCUGCC  
>P228  
AGGCGGCCAAGAAGAACUUAAGCGAGGCCCU GGGGACAAC

>P229  
GAUUUAUUGCAGACUCAAGA AUGAACAAUCCGUCAGAAACC  
>P230  
GAGGUUGGCUCGGCUUGGGG AAGAGGCUUCUGAUCUCUCCG  
>P231  
CCAUCCUUGCCUCAGUUUCA ACCCCAGCUUCUGUCACCAUU  
>P232  
CUUACACGACAAACGCACGC AUGGACCACUGAAUCUCACAC  
>P233  
GGUCCUAAAGAGCAAGCCUA ACUCAAGCCAUUGGCACACAG  
>P234  
GGGAUCCGCCGCGGAGCAGG AGCCAGAGCUGUGGCCGGAGC  
>P235  
GCCUGGGCUGGGAGGGAGAG ACCGGAGCAGCGCCAGGAGCC  
>P236  
AGCUACAGGCGGCGGGCA ACAGCGACUCCGACUCCUCCC  
>P237  
GAGCUCUGUCCAUCUCUGAA ACAUCCCUGGGCAGUGUUGA  
>P238  
GGCAGAGAGGAAGAGGAGGG AGAGGAGAGCGGUCCGGAAGC  
>P239  
CAUAGCACUCAUUCUAUUUC ACACAUCAUUUUUAACAAUGC  
>P240  
UAGGCCUGGUCAAGUUCAAG AACAGCAGGCCAUCCAGACA  
>P241  
CGCUGCCCACCUGCGCCCUG ACUGCUCCGCGCACCCACACC  
>P242  
AGAUA AAAAGUUGGCCAGCUA AACCAUCCUCCUCCUCCU  
>P243  
CGCCGGGCCUGGAGGCCG AACUCAGCCCGCAGGUCCAGG  
>P244  
CCAAGUAGGAGCCACAGCC AGGCCGAGCAGAGUGACCAGC  
>P245  
CGGCGGCGAUCUCCGGGAGC AUGUCGGUUCCCUUCCCGUGG  
>P246  
AGGCGUCGGGAACUUAGAAG AGCCUGCUUGCGAUCGCCGAG  
>P247  
GGCGGGGAAGGAGGUUCCCU AGUCGGCUCGACGCUUCAACA  
>P248  
AUGACUGCUUUUGCCACCAC ACCACCCAUUUCGUCCAUACC  
>P249  
CGGCAUCUAAAGCAGCUUCU AACAGAGAGAGAUGCUCAUG  
>P250  
CGAUGGGACCGCUGCUGCCG AACCCCGAGCUGCUGGCUUCU  
>P251  
CGCGGGAGGGCGUCUAGGGA AUCGAGGUGCCGGCUGCUCCU  
>P252  
AGCUCCCGCCCCUUCAUAGC AAUUCCUCAGCCUUCUCCGA

>P253  
UGGGGUGGCCUGGGGAAGAGAGCACAGAAGCCAGGGAAUGU  
>P254  
UCUGACUAGGCUAGUCGAGUACUAUUCGGGUCAUGGCGUC  
>P255  
CUGAGAGAAAAGUCGUAGAAUGCCUCCAAGUUCAGCAGAA  
>P256  
GAGGCGCGCUCGGCACCCGCACCCCGUGCCCCGCCUCAG  
>P257  
UGGCGGGAGGGCACUGCGGCAGCUUCCCCGCGGCGGGCC  
>P258  
GACCCCAAAGAAGAAGAUGAAAUGGUAACUGGAGCCGUAG  
>P259  
CUUUGCAUCCCCUCAAACCACUCUGUGAACUGCAGCCUGG  
>P260  
UGAACAGCCACUCUAUUGUAAGGACCAAGGAAUCCUCAGA  
>P261  
CACCGGCUUCACCUUCACCC AUGGUCCGGAGAGCCUAGCGG  
>P262  
CAUGC GCGGCCAGGCGACAGCCCCAGCGCCACCGCGGU  
>P263  
GGUGGAGGCUGUCGUGGGUAGAGCCGGAGGCCAAAGAGGA  
>P264  
GGGAGGGGGCGGAGAGGCCGAGGCGCGGAGCUGGUCCCCAG  
>P265  
UUACUUUCCACUCUAGGCCACGAUGCCGCAGUACCAGACC  
>P266  
CCUCGUGCCUGGCCCCACCACCCAUCUUAAGUGGCAAAG  
>P267  
ACGAACCCUCUCAGCGAGGGACCGGAAGUAACGCUAGGGGA  
>P268  
GGUAAAGCACCCAGGAAGCAACUGGCUACAAAAGCCGCUCG  
>P269  
AGCUGCCGCCAAAGCUCCGGAGCCCGACGCCACGACCUAG  
>P270  
CUGCCUGCCUCCUGGCAGGAGCGCGGCGUGGGGCUCUCAG  
>P271  
CCUCAGAGGCUGCUGCUCCAGCCAGGCGUUGGUUUUGCUC  
>P272  
UACCCACCUUCAGGCAGCCU AUGGGACGCAGGGCCCCAUCU  
>P273  
AAAGAAAAAGAGGAAACACAAGAAAGAGAAGAAGAAGAAAG  
>P274  
AACCUGCAACCCGCAACCCGAGACCCGCUACCCACUACCGU  
>P275  
GGUGGCCAGGCCAGACAGAGGUGACGUGGUACAAGGACG  
>P276  
AGAAACUGAGCUCAGCUCGAAAGUGCGAAUGGAGGCCGUG

>P277  
CCUCAGAGAUGGAGACAGACACAGCCUGAGGCAGGACGGGG  
>P278  
CCUCUGCCAGCAAACGGCGAAGACGCUCGAACUCACCCAGC  
>P279  
GUUGUUCAGGUUUAUCUUCUCAUCUUUCACUGGCAGUGCU  
>P280  
GAGCGAGUACAUGAAGCGCUACCAGGAGCCGCGCUGGGAGG  
>P281  
AUGGGGUGGCAGCGACUCCUACUGCUGCCUCGGCCUCCUGC  
>P282  
CCCCACUGUCCGACAUCGCCAUCGCCAUUUCUCUCCGGGUC  
>P283  
UCCGACCCACCAUCUUCUCUCAACGCUGAGCGUGGACGGU  
>P284  
GAGGAGGAGGAAGAAGAAGAAGAGGGAUGAAGAUGAUGAUGA  
>P285  
UCCCGGCGGAGAGGGAGGGGACCUGCAAGUGCGGAGACUGA  
>P286  
GCAACGACUCGCUGCCGCCCACGCUGACCCCGGCCGUGCCC  
>P287  
CGGACCCUCGGGGCCGGGGACGACGGGCGGCCAGGCGA  
>P288  
UGGAGGAAGCCAGGAGGGAGAGUGCAAUGCCGAGAAAGCAA  
>P289  
UACUUUGUGAUUAUCAGCUUUAGGGUUUGGAUUCUCUGCUGC  
>P290  
CGGCGGCAUCCUCCUGCCCACGGCGAUUGCGGCCGCCCC  
>P291  
AGAAGAGGAAGUGAAAAAAGAGACGGCUCAUCCCAAUGAAG  
>P292  
GGAAAAGUUCGCAACCGCCAAGAGGGGAAACGGGCUGCGCG  
>P293  
CGCCGAACACCACCAGGUGGAAAGGCCUCUGCUCGGUCGCC  
>P294  
UGCGGGCGCAGGAGCCUGAGAGCGGAGAGCAGGCUGUGGCC  
>P295  
ACAAACACCAUUUCUGAGCAGCGUUGUGCAUGCUUACGGC  
>P296  
CUCCCCUCUUUAGGUGUGCAGGUGACAGGGGAAGGCAGUA  
>P297  
GGAGAAGCGGCGGCAGCUGGACGCGCGCCGCAGCAAGUGCC  
>P298  
UUCUCAGACCAAGAAGAAGCAGUGGGUAAAUACCAGUCUUU  
>P299  
GCAUGGCACAUUACAACUUCAGAAAAUUACGGUGGUGCCG  
>P300  
AAGUGCUUGGGCUUCAUAUCAACACGUGUCUAUCCGCCUC

>P301  
CCCGUCCACAGUACCUGAUCAGCCUCCGGCCACAGACAACC  
>P302  
UGCAAACCCGGGAGCGGCUCACUUUUCAGGACUGAGCAGGA  
>P303  
GGCGCAGGGGCUCCGUGACCACCCUACGAGGCUGGGAGGCG  
>P304  
CCAGCAGCCCAUUCUGCGGCACAGCUCACUCCUAGAGACA  
>P305  
CCUGAACGGGGAGGUGGGCGAGAGGGCUUCGUUCCCCGCCA  
>P306  
GAGGCCAAAAGACGAUAUCAAGCUCACUGCCAAGAAGGAGG  
>P307  
GGCCCCGAGCCGCGGGAGUCGAGCGAAGGCAGCGCCGAGGCC  
>P308  
UAAUCCUCUUUCGAGACUAAGCUCUUUUUGUAUGCGUGU  
>P309  
UUUUGACAGGGCUGCAGAAGAUGUGAGGAAGCUGAAAGCAA  
>P310  
AGGACAGCGAGUCUGCGGCCAGCCAGCAGAGCCUGGAACUG  
>P311  
GUGCAACCACAAGCUUCGGCAGAACGCACUCCAGCUGCCCU  
>P312  
GGCCAGCGAGAAGUCCACCGAGUCCUGCAGGAGCCGCACCC  
>P313  
GAUCGUGCGCUCGCCGUGCAACCCCCUCUAAACUAUGAAA  
>P314  
CGGCCCGGGGAGGCAGCCGCAUCCCCCGGCGGGCCCCG  
>P315  
GCGAUGGAUCCACCGCGGGAGCAAGAAGGAGCCUGGAGG  
>P316  
UCCCGCCGACAGACCUUGGGACCGGGGCAACACUGGCAGC  
>P317  
CCCACUCCCGACCCGGGGCUAGCGUGCGUCCUAGAGUCGA  
>P318  
AAUGACGAUUGAGGAGAGGAAGCAGCUCAUCACUGUGAGAG  
>P319  
GUCAGGCUUUUGAGUUGCCCAGGAACUGUGGCCAAAGACCU  
>P320  
GCCCCAGGUGUAAGCGCAGAAGCAGGCGAACCCGCGGCGC  
>P321  
GCGACGCCGGGGGGCCGCUCAGCUCGCAUGCCCGGCCCGGC  
>P322  
AGACGAAGCCCCGGCGAGGAAGGUGGGCGGAGGCGGCGGCG  
>P323  
GACUCCCAUUUGGAUGCACAAGGAAGAAUUGUUCAGUUC  
>P324  
CUUUUAAAGGAGCAGUGAGGAGAAUGAAUACCUUCCAAGAC



>P325  
GCGGAUCUCCUCCACCGACCACGGCCGCUCCACACGGGCU  
>P326  
GGUGAGAGACCCGGCAAUGGAUCGAUCACUGCGUUCGUGU  
>P327  
CGCCGCCGCCGACCCGGGCAGCCCCUGGCCGCCGGCA  
>P328  
CGUUCUCCCCGCCCGCUCCAUCCGGGUCGCUGACGGCUGU  
>P329  
CGCGGGGUCCAGUUCAAGAAGGGAGAAGUCGUUUGCCUCG  
>P330  
UAACCACCCAAACCAUCAGGAGUACCAUAUCCUCCACUGUA  
>P331  
CACAGCUGUAGAGAGAGCAAACUUGUAAAACAUGGCUAAAC  
>P332  
CAGCUCCAUA AUGUCCCCCAGAGGAGUUUCCAGGCAUUA  
>P333  
AAUCUGAUAAGACUGAAGAGAUAGCAGAAGAGGAAGAAACU  
>P334  
CUGGGACCCCAUCUCAAAUCAGGCACUGCUGGGAAGAAAGA  
>P335  
UGCGUCUCCUCAGCACGCGACGGACUCGCAGGCCGCGAGA  
>P336  
GAGGCAGCCACCUAAGGUGGAGGUGGGGAAUAGUGUUUCC  
>P337  
AAUCGGGCCCCUGAAGCUGAGCGACAUCGGCGUGGAGGAC  
>P338  
AAUGAGUUCUGAAUCCAAUAACAAGAUGACAUCGGUGUG  
>P339  
AGCAGCCAGUCAGGGCCUCCAUUACAUCACAGUGGGGCUCC  
>P340  
CUCCAGGACAGCGGGGAGGUACCAGAGGACCUUCGUCUCC  
>P341  
GGCAUGGGCUGGCCCGGCACAGGGGCCCUUGGUAUGGCGG  
>P342  
GAAGGGAAACUGCGAGGCGAAGGUGACCGGGACCGAGGUA  
>P343  
CGACGUGAGCGAGGGUGCUUAGGGAGAACAGCCGCUGGCAG  
>P344  
AAGAGAGCAGCGCGCAAGCGACGAGAGCAGCGCCGCAGCCA  
>P345  
CCGGCUGGGGGUGCGCGGGGAUCCCCGAUUCGCGCCCGGG  
>P346  
GUCGCUGCAGCUGCCGGGAAAGAAGGAAACGACGACUCCGG  
>P347  
CAGCCCUCUUCUCCCCAUCAGGGGCAGUGCCCACGUCUUU  
>P348  
CAGCAAUGCUCGUUGAGAGACGCGGCUUUCGGCAAGAACU

>P349  
CCGUGCCGGAGGGAGGAGGAAGAGGAAGCCGGCGAGGAGGC  
>P350  
GGGGGCUUUUUGUCCUUAGCAUUGAGGAGAUUUUAGCUGAC  
>P351  
GCCCGGGCAGCGGCACCUACACCCGCCACGGCUACAUCUUU  
>P352  
CUAGAGUGCAGAUACUGCUCACUGGAGGCUGUCUCUGUGGC  
>P353  
GCCCAGAAUCCAGCCCAGAAUCCCGACCGCCGCGCCGGAC  
>P354  
CCCUAUCCUAGGACCCCAGAAAGAACGGGCGCCGCGCCCAA  
>P355  
CGACCCAGUCCGUUGUGGAGACGCUGGCCAAGAAGCGGCU  
>P356  
CCCGCGGCUCUCCUCUACCACCCGCGCCGUUCCCGGGCCC  
>P357  
GCCCUUGGCCUCCCCACUGCAGGUGGGCGUGCCACCUAUGA  
>P358  
CGGGGGCGCCGCUAGGCCGCAGCUCCGCCAUCGGGGUGCGU  
>P359  
UCAACUUGCGCAAAAUUGAGAGCAAGCCCUUCAACAACCAC  
>P360  
GGCUGCGACUGGAGGACACGACGACGUGUCGUUCAUGGAA  
>P361  
CGAGGACGAGGAGUUGGAAGAGAAGAGGAGCUGGAGGAGG  
>P362  
CCCCCGCCUGCGGAGGUAGCAGCGUUGGCGGUCCUCAGGC  
>P363  
GGCGUCUGCACCCAGCUACCACUAACCUCGCGCCGCGGUAC  
>P364  
GAGAAGCAAACCAAGCCAGCAGAAGCGCCCCGGCUGCAGCU  
>P365  
UUGUUCUGGUUCCUCAUUGAUGUCCAUAUGUUCUCUGAA  
>P366  
GGCACUGGAGCAGGUGGCGGAGGAGGGCAGGCAGCAGAACG  
>P367  
GGCCCCACCCGCCAAAUGAACAGCUCGGACGAAGAGAAGC  
>P368  
CGGGCACCGCUGCCUCCCCGAGUUACAUCGCCGGCGGCAGG  
>P369  
GGACUGGAUGAGGACAGAGGAGCUGGCCGAACAGCUGAUGA  
>P370  
GAGCGGGUGAAGAAAUAGAAGAAGUGGAAAGGAAAAAACG  
>P371  
UUGGAACAGAGGGAAGCUGAACUCCAGAAAGUGCGGAAGGC  
>P372  
CGAUCAGCCCGACUCCAAGCAUCAGCUGAGUGUCCGCCACC

>P373  
CAUCUCACCACUUCUAAGGCACUGGAGAGGGGAAAAGAGA  
>P374  
UCCCGGGGAGGAGGAAAUCGACUUGUCACUCCUGAAGUGU  
>P375  
CCAGUCCAGCGCGACGAGGAAGAGGAAAAAGAAGUCGAAAA  
>P376  
GCGGCUCCGGCGGCGCCAUGACGCGCUGGGUGCCCACCAAG  
>P377  
CCAAAGUCCGCCGAGGAGGAGCCGGCGCCGCGCUCACCUC  
>P378  
ACCCAGACCCGGCGAUGAGGAGUGGGCGCCGAGCGCAGGGGC  
>P379  
GCGAGCCCACGGCUGCGGCCACCGCCAGGAGGAGCAAGAGG  
>P380  
GCCGCGGCCGAGCGGGAAGGAGCGGGCGGGCGGCGCGCGG  
>P381  
UGCUGGGGGGUGGCCCCAGCACAGCCACCUCAUGUCCUCC  
>P382  
AAGGAUGAUUGUAGCUCACCACCCAGAGUGCAGGAUCAUA  
>P383  
AUCCUUGACCUUAUUCSCCAAGAAGCGGCCUCCCGGAA  
>P384  
CGGAAGCAAGGAAGGAAGGAGGGCUGCUGGAGCCCAGUCA  
>P385  
GCGGCCCGGGGUCCUCCUACAGGGUCUCCUGCCCCACCUGC  
>P386  
GGCAGGAGGCGAGGCGGAGGAGCCGGUGCUGAGCAGGGACG  
>P387  
GACCACACUUCAGAAGCCCCAUCCCCCUGCCACCGGGCGA  
>P388  
ACCCAACCCCCUGGGUCCACCCUCCUCAAGGCCUCCUC  
>P389  
UGCUGCCUGUGCGUCUGGCCACGGCCAUGAUGGUGCCCUAC  
>P390  
CCGUUGAGGAUGAGGCCGCUAGAGGCCUGAGGAUGAGCUGG  
>P391  
GGCGGGUGCAGCCAGCAGGCAGAGGGCGAGCGGCAGAAGGC  
>P392  
ACGUGCCCACCAGCUGCCGAGGCCAAGACGCCAGGUCCGG  
>P393  
UGCAGCAGGACGUCACCAGGAGGGCGAAGCGGCCACGGGAG  
>P394  
GCCAGGCCCCCUUGCCGGCCACCCGCCAGGCCCGCGCCGG  
>P395  
CCUUGGGAAUCCUGCCACAGACAGGGGCGAGGGCCUGUGG  
>P396  
GAAGGUGACGAGGAGGGAGAAGACGAGGAUGAUGCGGAAU

>P397  
GGGGUCUGGCCAGGAGCCGCAGUUGCAGCCGCUGCUGCCGC  
>P398  
GCGGUAGCGGCGGCGGGAGGGGCGGCCUGAGGGCGGAC  
>P399  
GAAGCGCCACGGCUAGAGCCACUUCGGGCGGACCUCUCA  
>P400  
CCUGCUUAGCCAGAAUCUCCAAUAUUCUUGCCCAUCUUA  
>P401  
GGAGAAUCAGCGUGUCUGAAGGAACAGGCCUGCAGGAGG  
>P402  
CGCGCUCCGGGCAAAGGUGGAGGGGUGGGGGGCGUCACUG  
>P403  
CAGUUUUGCUGGAGGCCGCAACCAGGCCGCGCCGCCACCA  
>P404  
GUCCCAGUCGGCUUUACCCUAUCGACGCAGCGUCCCCACUG  
>P405  
GCCGUCGCCCGAUUCCGGAUCUCAUUGCCACGCGCCCC  
>P406  
ACCACAGCCAUGUGCUCGUUAGCGUCAGGCGCUACCGGUGG  
>P407  
GCCAUCAUCCAUGGAACCAGAGUGGGCCUUCUCAGAUUAG  
>P408  
ACUGGGUCUGCAGUGGCGACAGCCAGCAAGAGCAACGUCAC  
>P409  
UCUUUGGAGGGUGGGGCAGGAGUAUAUGAGCAUCCUCUCUC  
>P410  
UCCCCACAGCGCCAGCAGCGAGCCCAGCGCCAGCAGCCAGA  
>P411  
GGUCAGGACAAGGAUAGCGGAAACGGGCCCUUGGCUUGUCG  
>P412  
UCACCCCAACAACCCUCCCCACAUCCCAGAAUCCAUCCAC  
>P413  
GAGGGGGGCCAGGUGCUGGAGGCCGACUUGGUGAUGGCU  
>P414  
AGUGC UCCCCUCACUGGUUAGCGGUCACUCCCGCCUUAAG  
>P415  
GGUAGGGAAGGGACGAGUCUAGGCUGAGGGCAAGAUGGGAG  
>P416  
AGGCUGGCAACUACAGGCGCACGGUACAGCGGUGGAGGAC  
>P417  
CCCACCGUCGCCACCUUCUAGGCUCUACCUCUGCUUCUCG  
>P418  
UCUACACCCUGUCCGCGGGAGGUGCCGGGUCGGGCGCAC  
>P419  
UGGGGGCCUCGGCGCUGACCAGGGGUGAGCACGGGCAGCCA  
>P420  
GUGGCAGAGUAUCCAGCGUGAGUUAGAUGAAGAGGACAAU

>P421  
ACUACCAUCUCCUUCUCCAAGGCUCGCAACUCUGCCUACA  
>P422  
AUGCCAGGAGGGACUAUGAAAAGCCAUGAAAGAAUAUGAA  
>P423  
AGAUUCCCAACCUGCUGAGCAUCCGCACACCCACUCAGGAG  
>P424  
GCCCCGUCCCGUCGGGGCCGAUGGCUCCUCCGAGGCCCGC  
>P425  
GGGUGGGUGGGGGGAGGGUAGUUGGGGGCUC AAGACUGGG  
>P426  
GCGCCAUGGCUCCCCGCGGGAGGAAGCGUAAGGCUGAGGCC  
>P427  
GAAGAUGAAGGAACGACAGGAGAGGAAGCUGGCCAAGGACU  
>P428  
GGUCCCCGCUGCUGCCGGGACUGCUCGCGGGCAGCUGGG  
>P429  
CUGGCAGACCCAGUCAUGGCAGCCUCCAGCAUCAGUUCACC  
>P430  
UCCUCCUCCUCCUCCUGGUUCCACUACCAGCAUCUCAUG  
>P431  
ACGGUCAGAUGGGGAAGACAGCUGGGUUCACUGGGCUGGU  
>P432  
GAAGAUGGGCAGAAAGCUGGAGCCCCUGGAGUUGGCUGUGU  
>P433  
CCAGGGUGUGCUUGUCAAAAGAGAUAUUCCGCCAAGCCAGAU  
>P434  
AUGUCACCCAGCUCAUGUCCACCGAGCCUCUGCCCCGCACU  
>P435  
GGACUGAGCACCUGUGGGGAAGGGAGGUGGGCUGAGAGGUA  
>P436  
CCACAGCAAGGGUAAUCCCCAGGCAGACCCUAAAAAGCC  
>P437  
CAAGGCCUGAACCUGGGGCCAGACACCUGCUCUCCCGGCC  
>P438  
UUUUCUCCGCAGAUCUCCUAGAGCACGAAAUCCUGCUGCA  
>P439  
ACUCCCCGAGGGAUCUCCACAACCGCCGCUCUUCUCGCUCU  
>P440  
ACGGGCGGAGCCUGGGCUCUAGAAAAACUAGCCAGAAGGU  
>P441  
CGAGGUCCGACACUUCACUGACGGCAGCUUCCCCGCCGGCU  
>P442  
CUGAGGGCAGGGGAGGAGCGAGGCAGGCGGCCGGCUGCGGC  
>P443  
UGCUGAGGCCACCUUUGCCCACGGCUCCACUCUGCUCCGA  
>P444  
GUUGCCGCCUCCUGCCGGCAAGUGUGUGAAGAAGAAGCUG

>P445  
GGUGCAAGGCAGGCACAGGCAGGGGGCCUGGGGCGGAUGGG  
>P446  
CAGCUCUGAGAGGUCGCCAAAGCCUGCAGCCUGGCCUGGGC  
>P447  
ACGCGGAGCGGACGGAUUCGAUUCAACGGGGUUCGGACCG  
>P448  
CUGCCCACGCUGCACCCAGCACCCAGCGCCCUGACCCCC  
>P449  
CCACCCGCUUCUUGACCCCGAUCUGCAGCUUCCUUUUGCCC  
>P450  
CGCACCCGGGAGCAGCGGGCACCCUGUCGGGCGCUGACUCGG  
>P451  
CAUUCUCCUCAUAUCCCUCAACCGGCCUUUCGGCACCUGG  
>P452  
GGAGAAGGUGAGCGUGGAGAACUUCGAGCUGCUCUAAAGGUGC  
>P453  
CAUCCCGCAUGGCAACAGCAGCAGGCGGCUGCCGCAGCUU  
>P454  
GCCUGACUCGCUGCUGAAGAUGACCUUGGGGGUGUGACC  
>P455  
CAUUCUGAAGAAGAUGAAGCAGAAAGAGCGGGAGCUGCGAC  
>P456  
CCGGCGCUCCGCUCCGCUCCAGCUCGGUUUCAUGUCCCGCC  
>P457  
CGGCGCUGGAGGAGCUCGAGACGGAGCCUAAGUUAUGUCUG  
>P458  
GGCAGGCGCGCCCCUGGAGGAUGAGGCCACUCUGGGCCAGU  
>P459  
AGCCUCCCACCAGCCCCUGAAAUGGAAAGGCCUCCAGGUA  
>P460  
GGACAGGUGGAAAGGGGCCAUGGGGGGCCACAGUGGGAAC  
>P461  
GUCCUUCGUGCAUCGCUGCCAGCGCAGUCACCACCACCCC  
>P462  
GGAGCAGAAAUCUCGAGAGGACGCUCUCCUGGUGAGAACGU  
>P463  
UCAGAGGCAGGCCCGGCUGCACAAGUCCUCCUGCUGGGCC  
>P464  
UAUUCAGGAGGCUACCAUUUAAAGUUUGCAGAUGAGCUUAU  
>P465  
GCCAAGCCAAGCCGCCUGCUACCUUCAUCACCAAUUGCAC  
>P466  
UCGCAUUAAGGAGGCCGCUGAGGCCGCGCGGCAGCGGUGGG  
>P467  
GUCGGGCGUCUUGAGCGAGAAGCAGAUGAGCGGGGAAGGGG  
>P468  
UCCCGGGACGCAGCCAUCUCAGGAGACGAGGGCUGGUGGGC

>P469  
UGGCGGGUACGGCGUCGCGCAUGUGGCGGAGCGCAAGUGG  
>P470  
UUCGUCGUUCGCCACCGCUACCGCCACUGCCGCCACUCCG  
>P471  
AGAAGGACCUGGCAGAGAAGAGGGUGAGCACCUGGGCAGCA  
>P472  
CCCCAUGGGCUCUGCCACGAAGUCUCGGUGCUUUUGGGAGG  
>P473  
CCCUUGCCAGUUCCCUGGUGACAGUUACCAGCUUUCUGAA  
>P474  
GCCGCCACCUCAGGCCACUAUGGCGCCUGGGCUGCCCAGG  
>P475  
GUCAGAGGAGGAGCGGCUGAAGUUGGCUCAGCAGCAGGCGG  
>P476  
UCUUCUUCUCCUCAGCUCAUGAGUUCAGGGGUCUCCAUU  
>P477  
UCUCACCAACCCGGGGUCUGAGCCCCUCAUUCUGACCGUC  
>P478  
AGCUGGGCCACGGCCUGCUCACUGCGCUGCAGCUUCUGCUG  
>P479  
CUCUGGGGAAUGUGGGUUCAUCCAGGAUUGGGGGCCUCUC  
>P480  
GUGCCAUCCCAGCCAGGAGCACGUAAGUAAUGAAGGCCAUC  
>P481  
UGGUCGGGAUCAGCUUCUUCAUCCUGGGGCUGGGCACCCUC  
>P482  
UGUGGGUGACAGCAGGCGGAAGGCCUCACGGCAGUCCAGGC  
>P483  
CAGGCCACGGCCGCGGCCACAGCGGGUGAGCACGAGAG  
>P484  
GGACAAUGAUGAUGCAGCAGAGGCCAGUUCUGAGCCAACAG  
>P485  
CCUGGCAGUACGGGCCUGCACCGGUGAGAACCACCCAGC  
>P486  
GACCGGCCAGUGGGCGCGAGAAAGACAGCUGCUGAGAGAGA  
>P487  
UCACGUUGCCGCCGUGACCAGGCACUUCAUGCUGCCCCAG  
>P488  
CUUCCUCCGUCUCCAAAUCCAAAUCAAACACGGCCGCCAUG  
>P489  
CAGCAUUGAUGAUGCCUUCGAGCUGUCCUGGAGGACGGGG  
>P490  
CACCUGGGGGCGGCCUCGCACACCACCGUGUCGCUCGCCC  
>P491  
CCCUGCGCCUCACGCCUCGAGCCCCUGCUGGCCCCGAAGU  
>P492  
ACCUCAACCUGCAGGGCCCCAACUUUGAGUUCUCCACGGAG

>P493  
GCUUCCCCUCCUGCAGGUCCAGGGCCAGGCCGUUGGGCCAC  
>P494  
GAAUGUUUGAAGAGUAGAACAUGUCCAUGUUGUACAGGGAG  
>P495  
UUGCCGUGGUGCACUUUGCCAGCCGCCAGUGGAAGGUGACC  
>P496  
GGAGAGCUUGGGAGCCGACGAAGCAGCCCCGCGGCCGCGU  
>P497  
UUGACAUCAUGCUUUCUGGAACUUCCCCGUGUGUCCACU  
>P498  
UCUUUCAGGCAAAGCACUAAAGGGCCAGUACCAGUGAGUGG  
>P499  
GGAGCAGGCCAGCGGGCGGCAGGCGGACCCAGCCAGAGAG  
>P500  
GCCAGAACAUUGCACGCGACAGUUUCAGGCACAGAACUGAC  
>P501  
GCUUUGGGGGGUCCUCCUGAAGGGGCUUCCUUGGCAGAA  
>P502  
CCAGCUCGGCUCCCCGUUCGACUCGGCGCCGCGGCCCGGCU  
>P503  
GGUCUUCGGUUUGCACAGCUAGAGGCCGCGCAGCAGCAAAG  
>P504  
CUGUUUGACUACGUGCGUGCAGCCUCCCCUCGAUGUCGGCC  
>P505  
AGCACCACCAGCCCCACUACAGCCUCCGCUACCACCGCUUC  
>P506  
CAGGGGAGCGGGCUAAGAGUAGAAUCGUGUCGCGGCUCGAG  
>P507  
AGGCCAGGUUCAGGCUCUGAUGGUGGGCGCAGGCAGGCCG  
>P508  
GGGCUCCGUGGAAAAGGGAUGAGAGUCCAAGGGGGAAGG  
>P509  
GAUUGAGACGGAUGAGGAGGAGAGUUGUGACAAUGCUC AUG  
>P510  
CAAUUGCCACGGGUACUGGC AAUUGGUUUUCGGCUUUGGCG  
>P511  
CCUCUGCCCGGCUCGCGGAUCGUCCAGUACUCCUAACA  
>P512  
GUGGUGAAGCCGGAGCCGCGAGAGAGCCGGGGAGAGGAAGA  
>P513  
GGGACUAAGCCAAGGGAUUCAGGUGUGGUGCCGGUGGGAAC  
>P514  
CGGCGACAAAGAGUCCCCGAAGGCGGCGGCGGCCGUGCC  
>P515  
GCGCUGCCACCAGUCCAGAGAGAACCGGCUCGUGUCACCCG  
>P516  
GGCGUCUGUAUGAUCUUCGGAAGCCUGCUGCAUCGGACCUCG



>P517  
ACUGCCUGAAAGCUAGCGGCACUGCCAGAGGCGACCACCGC  
>P518  
UCUCCUUGUCGGCGCCGCUGAUUCCCGGCUCUGCGGAGGCC  
>P519  
UCAACCGCGGCGGUGGCUGCAGCGCAGAUCCCGACUCCUCU  
>P520  
GCGCCGCCGCGCAGCGCCCCAGCCACACGCCGGCGGGCAGA  
>P521  
CGCUGCAAGUGCCUCGGGCCAUCCGCCAUGACCAUGCUGGG  
>P522  
UGGAGCCUUCUCCGAGCAGAUCAAUACAGCCCUUUCUC  
>P523  
GAGCUCGGGACCGGCCCAGGAGCAGCGGGUGGAGAUGGAGA  
>P524  
GAAAAGAGGCGAGAUUAUAUCAGCAUUUGCUGACUAUAGGCC  
>P525  
UCUCUCUCCAUCCUGCCCUAGGCAACUGCAGCUUCACCGA  
>P526  
CUCCUUCUCUUUCCUCCAGAAGCCAGGGAGUGACCCUGCAG  
>P527  
GAGCGAGCGACCGACGCGCCACCCGCCGACGCCUCAGCCGC  
>P528  
GUGUGUGGGAACGCAAUGUGACUGGGCGAGGGGUGACGGUG  
>P529  
AAGGGAGAGCCGACUGCGAGAGGAAGGCGACCUGGGUGGG  
>P530  
CAUUCAGAAACCAUGGCCCAUUUGUCCGUAACCUUGUGGA  
>P531  
GCUCCACUGGGGAUAGGGGUAGGGUCUGGGGAACGGGAGCA  
>P532  
AGGGCUCUGGGCAGCGGCUGAGUUCAGGUGCAUCUGGCUGG  
>P533  
UUGCCCCCUGCCCCAGCCAAGCCAAUGCACCCAGAAAUA  
>P534  
GGACGCUGGAAAGUCGGCCAAGAAAGACAAAGACCCAGUGA  
>P535  
GGGCGUCGCUCCAGCCCCAGAGGGAGAGAAGAAGCAGAAGC  
>P536  
UUUGCUCAGAUUGGUGUGGGAGAGCCUGCCUGUGGGGAGC  
>P537  
AGCGAGUCCUGAGCACCCUGAUGUCCUCGUGACCCCGGAG  
>P538  
GCGGAAUCGGGCCUCUAGGAUCUAGCUCUCCGGGACGUUC  
>P539  
CAGAGCCCCACCCGGCACCACACAGACCCACCCCGCCC  
>P540  
CAUGGCGCGGAAGAAGAUAAAGAGCGGAGAGCGCGGCCGGA

>P541  
CUGGCCGGCUUUCUAAACGAUCCGCGGGGCUCCCUCAGCC  
>P542  
ACCAAGUCCCAGUCUCCACAAGGGCACUGCCAUGACUCC  
>P543  
GGGGCUUGUGGCUCUCCAACCCACUCCCCGUUCAGCAC  
>P544  
GUCCCUGGUGCAGAUUCUGCAGCCACAGCGUCGUGUAGACA  
>P545  
CGGCCCAUGCCGUGCGGCAGAACCCUCCGAAUCAUAACCCC  
>P546  
UGGCGGCGUGGGCCUCCUCCAGUCCA AUUCGCGCUUCCUC  
>P547  
CCUCCCAGGAGGGCAGGGGCAUUGGGAAUGGGUGGGUGCCC  
>P548  
GCUGGAGAAGAAGAAGCAGAAGGAGCAGGAGCAAGGUGAGC  
>P549  
GCAGCCACAGGUAGACGAGGACAAGGACGACUGGGAAUCCU  
>P550  
CCGGCACCGAGUCGAGGCGGAUGCGGCGGACGCGGCUCCCA  
>P551  
CAGGCCCCACUUUGCCCUGAAUGGAGAGCUGAUUCCUUGC  
>P552  
CCCAGCGCCGCGGAGGGGGGAGGAGGAAGAUGGAGACCCAC  
>P553  
GGGAGGGGGGAGGAGGGGGGACGGAGGAGGGAGGGGGCCA  
>P554  
GCUGCAGGGCCGCUAGGCUGAUGUCGCGCCCCUCCCCACC  
>P555  
GCGCCGGCACCCAGCUCCCGUAUAACGGCGCGCCGCGCGGA  
>P556  
GCCGGCAGCGGAAGCCUCC AUGCCCGCCACCGAGGAAGCC  
>P557  
CCGCACCAUGGUCCCUUCAAGGCUUGGUAUUUACAGUUCU  
>P558  
CCAGAGGCACCCAGUCCCACAAGGCGCCUACCUGCCCCGGAU  
>P559  
ACAUCUUACCUGGGGAUCUCAACCCGCGGCUCUGAUUCCGGC  
>P560  
UGCCAUCACUGCCACCCAGAAGACUGUGGAUGGCCCCUCCG  
>P561  
CGUCCCUCAUGAAGCGGAACAUCUGAUCUCAGCUCCAGGG  
>P562  
AGGGACCCGGAUCGUCGGUAUACUGACAGCAGCGCCUCCU  
>P563  
UGGGGAAACUGGAAGAUGAACGGGCGGAAGCAGAGUCUGG  
>P564  
AAUCGCCUGCAUUGGGGAGAGCUAGAUGAAAGGGAAGCUG

>P565  
AAAGAGUGGAGGUGGGUGGUAGGGGCGGGCUGGGCCCUGGG  
>P566  
AGGGGAGGGGCGGCGGCCACAGGGGUUGGGCAUGGGGGAGG  
>P567  
UCCACCCCAGAGGAAGUGGAUCUGCUUCUCCAGUUUUUGA  
>P568  
CCAGUGCCGCGGCCUCAAGAUCAGACAUGGCCCAGAACUU  
>P569  
GGACCCGACAGGACGGCCUAGAGGAGGUGCUGCCGCCACA  
>P570  
CUCACAACAUUUGGCCUUCAUGCUCGUAAAAUCUCUUUUU  
>P571  
UGCCCCACCAUGUCAGACGCAGCCGUAGACACCAGCUCCGA  
>P572  
AGAGACAGGCCCGGAGGCUGAGCGGCCGGAGCAGCUGGAGU  
>P573  
CCGGCGAAGAAGGUGAGCGCAGUGCUGUGGCAGCAGAGG  
>P574  
GGAAGAUUCGAUGGACAUGGACAUGAGCCCCUGAGGCCCC  
>P575  
CAGCAGAUGGGAGCACCUGGACUUGGGGGUAGGGGAGGGU  
>P576  
GGGGCUGACGCGUCCAGCCCACGCAGGGGCCUGGGCGGCGG  
>P577  
GGUGCCCCGAUUGUGCGCGGACAUGGCGGGCAGCUCGGG  
>P578  
CAACUCUUAAGGAAAAACUCAUUGCACCAGUUGCGGAAGAA  
>P579  
AGCGCCAGACCCGAGCCUCACUCACUGCUCACUCCCGGGG  
>P580  
CAGUACUCCCGCCCCCGCCAUUUCGGACUGGGAGCGAGCG  
>P581  
UCUGAAGUUUCUCUCCAACACCUUUGCUCUCCUCCUCCU  
>P582  
GCCAUCUGCUCGUGGUUGUAGAAGGGGCAGGCUGCCUGCU  
>P583  
CGCCAGGCCAGUCCCCUCAAGCGCUCCUCCUCCUCAACU  
>P584  
CCGCUUCCGCCCGGCUUAUUAUCCUCCUUAUUGACAAACAG  
>P585  
CGUUCUCUCGGAAUUCUUUCAUAUUCAUAUCGUCCUCAGA  
>P586  
AGGAAUGGCCUGUCCGCGUUAACCAUCACAAGCCAUGGUU  
>P587  
AAAGGCGGAGCGUGCGGUAACGCGUGGUCGGGCUGCUGCU  
>P588  
GCGUGCCGCUCCGCCGACCGAAGAGGCUGGUAAGUCCUCA

>P589  
GACGGUUUGCUGGCUGAACGAGAGCAGGAAGAAGCCAUUGC  
>P590  
AUGGAACGGGAGACCAAUGGAAAUGAGGAUGAGGAAGGGCG  
>P591  
CUCUCCAUGCAAGUGUGGCCAGGGCCUGGGUAUCAUGUCC  
>P592  
GCCGCAGCGGCGCAGCUGAUAAGCAGGAACAGGUGAGAGGCU  
>P593  
UUGC UUUGAGCCAGCCAACCAAGAUUGGUGAAAUGUGACCCUC  
>P594  
CUGGUUUGCUGGCUCAAGCAAGCAUUGGUGAUCUCUGCUA  
>P595  
CUGGAUGCCGUGUCCAGGCAGUAGAGCUCCAGCAGGCAU  
>P596  
AUCUGGCUAUAAGGCGGUUAAGGUUAGUGUAGGUUGGGCG  
>P597  
GUCCUCACGGGCCUCUGAAAACUCGCCUCCUCAUCCCU  
>P598  
UGGUCCACGGCGCACGAUGUAACAGUGGGGAAAGGCGUGCG  
>P599  
AGGUGAGUCGGUGCUUGCCAAGAGGCAGAGCGAAAACCUA  
>P600  
GGGGGAGGAGCGCGGCGGCGACGGCGGCGGUGGCUCUAGAA  
>P601  
AGGUCCAUCCCGGCCAGCCACCAUGUCCAUCACUUCAGC  
>P602  
CUGGCGCACCCGUGGAGGGAGGGGUCGGCGUCCAGCCGCA  
>P603  
CGCCUGCAGCGGGGCAAGCAGGAUAUGGCACGGCAGCUGC  
>P604  
GCUGCUGGAACCCGAGCCGAGCCGGAGCCGAGCCACAGCGGGGAG  
>P605  
GAGUCCGUCCCGCCCCAAAACGAUCCCGCAGCAAACUCAU  
>P606  
ACAUCUUGCCGGUUCGCAGGACGUCUGCAGUCGGCAAACUC  
>P607  
ACGGCUUGGGCCGGUACGGGAUGGUCACGCCCUUCGGGGGG  
>P608  
CCGCCUGGAGAAGGUGGCAGAUAGAGAAGUGGAAUGAGGAUG  
>P609  
GCCAGCGUGGAUGCAGGAGCAGCGAAGUCGUCAUGACAUGA  
>P610  
GAGUUCGGAGUUACAUUGCGAGGGCAUGUCAUUUUCAGAGA  
>P611  
UCACCCUGCCGUCAUGUCUAAGUCAGAGGUGAGUUAGGCGC  
>P612  
CACAAUCUGUGAAGUUAGAAAAGCCCUGUCAAGCAAGAGAU

>P613  
AAAACUUACCAUCAUUACCAAAUCCAUAUAGCCAUCCCCA  
>P614  
GUCCC GCCUCCUAAAAGAACACCAGGCCAAGCAGAAUGAAC  
>P615  
UCGGGUCAGCCCGGCCUUGGAGCGGGGGCCUGGGAACCCUG  
>P616  
AACCAAAAACACUCACCCAAAAAAUGGC GCUAAGGCCGA  
>P617  
GAAGGAUGUCCCCGUGAAGAACACCAGCAGGGCCUCCAUCU  
>P618  
GUGGCGUUCACCUCAGCUUGAUGCUGCAGCAGCAUCCGGAG  
>P619  
GGGAUGCAGGCGCGGGGGACUGGCAGCAAUCAUGCCCUG  
>P620  
CCGGGGCCUUGCGGAGACUCACCCCUUCAGCGUCGUGCCC  
>P621  
UUCUCAUCUUAGGGUCUGGAACAGAAUCUGACAGUGAUGAA  
>P622  
UGAAAGUGGCCACCAGCUUCAGGGGGUCCUCUGAUUAUG  
>P623  
AAGAGAAGUACAGCAUCGCAACUCGGAAGUCGCAGGAGGUC  
>P624  
ACGUCAAGCGGAUAUCAGCCACGUCCAUCUUCUUCGAGUCU  
>P625  
GGGCAGAGCAGAGGUGCUC AUCAGCACUGUAGGCCCGGAA  
>P626  
GAUCUUGCAGUAAUGGGUAUAGGGCUCCCCACAAAACAUG  
>P627  
GGAUGAGGAUGAAGAUGAGGAUGAACGGCAGUUACUGGGAG  
>P628  
CCCUUGAUCUGAGAAUGGCUACCUCUGAU AUGAGCCAGUG  
>P629  
AAAAGAAAGAUGCGUGCUGAAAGAGAAAAAAGAAUGCCCC  
>P630  
GGACGACGACUACCUAAACGACGACGUGGAGGAGGAUGAAG  
>P631  
AGGGAGGGGGCAGCCCGUCGAGGCGCCUCCCUAGUCAGCGU  
>P632  
CGCGCUCCCCCGGGUCGCUACUCUAGGCGCCACGGCGGUC  
>P633  
CUAAAGCCUUUCCACACACAACCAAAGUUGGCUGCAGUUU  
>P634  
UCCGAGGAGUCCGCACACAAGUGAAUCCCUACAGCUCG  
>P635  
UCCGGCUCCAGGUGUGCCGAGCUGGCGCGCUCUUCGG  
>P636  
UCUCACAUUCUUAUUCUGUACCCGACAGUGGAAACCCCUU

>P637  
GUGCUUCCGGAGCGAGCAGGAGGACGAGGUAGGGCGCCCGG  
>P638  
UACCUGAAAAAACCCGUAGAUAGCCUCGGAGACCGCCGUG  
>P639  
GGAGAGGCCAACGAACAGGUUCCACUAUCUCGGGCAUGGC  
>P640  
UCGCGGGUCGCCGACUGCCCAGACUCCCCACCUCUGGUUCU  
>P641  
UUGCGAGGAAACCGCCUCGGAGCUGCAGCCGAAGGCCAAGG  
>P642  
ACUUGAGACUCACCGGCCGCACGCCAUGAGGGCCCUGUGGG  
>P643  
GGAUGGUACAGUAGAAGAGGAUCUGGGUAAAAGUAGAGAAG  
>P644  
AUCCUCGAGUUCGCGGUACAGUCUCUAGUAGAGCGCGUGU  
>P645  
CGGGCUGUGGCCGUCGACAUACAAGACCAUGGGGCCAGC  
>P646  
UUGCUCUUGUGUUUCAGGGAUCCUCUUGUGCCCGUCGGU  
>P647  
GGUUACCUCAAAUUCUCCUCACGAAACCGUUUCCCCACCCC  
>P648  
CCGCCCCUCGCGCGGCCCCGAGCUCCGCAGGGCGGGUUGGG  
>P649  
UGUGCAGAUUCUCAAUACCACACCAACUUUAAAGUGUCA  
>P650  
CACCGGGCCAGUCCCGAACC AUGGCCGGGCCACCCCGCAAC  
>P651  
GUUGGAGGCAGGUGUCAUGGAGGGUGGAGUUGGCGCAAGCC  
>P652  
CCUCGGGCAGCCACCCUACACGGCCGCCUCCAGGCCCCC  
>P653  
UCUCCUUCUUUUUCUUUCAACCUACAAGGACACAAAUGCA  
>P654  
ACCGCUGCCGCUUCCGGCCCACGACCUCUGAGAAAUGUCC  
>P655  
UCGACCUCGCAGGGCCUCGCAGCCUCCAGGUCCUGGCCG  
>P656  
AGGAGGCGAGGGGCGGCCCGAGCGCGGGGCGGGAGCGAGGC  
>P657  
AUGGCGGGGAGACGAAGGUGACCAGAUCGCUGAGAUCGUC  
>P658  
CCAGCAGCCCCGCGGCACUCAUGUCGCCUCUGACCGCAGCU  
>P659  
AGUUCAAAUAUGGAGCGCGGAUCCUUUGGAUGCUGGUGCU  
>P660  
CCAUUUCUCCAUAUAAUAGCAUCCUCUGCAUCUCUAAAAAA

>P661  
GCUGCUGUUGUCCGAGGCAUAGGGGUUGGGUGUGCGGGGGC  
>P662  
UCUACUUCAAUCCCAUGAUGACCAAUGGGGUUGUGCACGCC  
>P663  
UUUGAGCAGGACGGGGAGGAAGCGGCUCUGGCCCCGGGGGC  
>P664  
CAGCCCACCGCCGGAGCCUGAGACCACAGAUGCCUCACACC  
>P665  
ACCCACCUUCCAUCAGCCACAAGAAGUUUGCUGGAGUCAACA  
>P666  
AUCUGUCCUACGGCCGAGUGACCUAAACGUGUUGCGCGAG  
>P667  
GGACGCCGCCGGUCGCCGCCACCUGUCCACUGCAGCAGCA  
>P668  
AACUAAAGAGGAACACUCAGAUUUCUGGCCCCUCUCCUGA  
>P669  
GGAGGAGGUGGCGCGGGUGAAGGAGCAGCUGGCCUCCAGG  
>P670  
GGCAUCAUUCACGCUAGAGGACUGGUUCGGGAGUGCUUGGC  
>P671  
GCAGAACCUCAAAAACUCCACCUCUUCUUGUGAUUCCAC  
>P672  
UCUUAGGUAGCACCGUCGUGAGGCCCGAGGUGGGGUUGGGG  
>P673  
AGCUGGAGGCAGACCUGCAGACCAAGGAGCAGGAGAUGGGC  
>P674  
GCCCGGCCUCGACAGCGGCAAGUUUGGGAGUUGCACGAGU  
>P675  
GCUGGCCCCAGGGAAGGAGUAGAGGGGGCGGGCAGGGGUG  
>P676  
CGCAGCAGCCAGGAGGAGAAAGAUGAGAAGGAGAAGGAAAA  
>P677  
GAAUGUCAAGGCAAAGAUCCAAGACAAGGAAGGCAUCCUC  
>P678  
CUCCUCCUCAGCUGAGGGCCAGCGGCGACGCUUCCGGUGGG  
>P679  
UGCAAUGCAGGCCUUGGAGGACUGUGCGUCACCCGUCAACC  
>P680  
AUUUUUCAUUGUAGUGUAGGAAGAAUGAUGAUGGAGACACA  
>P681  
CUUCUCAAAUUCACCAGUCAAUGACGUUUCACGAAGGUCG  
>P682  
CGCCGGGGACGCUGUCAUGUACGGCGCGAGCGGGGGCCGCG  
>P683  
UCUGAAGAGGAGGCGCGAAUAGAGGCCUUGUGUGAUGAAGA  
>P684  
CACUUACGGUAGCGACUAUUACGACCCGUCAGAGCCGACGG

>P685  
ACGUCCAGCCCGUGAUUGAC**A**AGCUGGCCGAGUAUGUCGCC  
>P686  
CUGGGAGCUGUGUUCAGCCC**A**CCACAGGCCAGCCUCCCCA  
>P687  
UUCCUCCUGGGUAACGCGCG**A**CUCCACCGCCAUCUCCUCC  
>P688  
CAAGGAGCGCGGAAUCGGGG**A**GCGUCCGGAGCUAGCUGGAU  
>P689  
CUCCCCUCCCCGGCCUCGCG**A**GCUCCGGGCGACGCCGACUU  
>P690  
AGAGGAGGAAGAUGAGGAAG**A**UGAAGAGGAUGAGGAGGAGG  
>P691  
UCUGACACUCAGAAGGACAC**A**CAGACAGCCGCGGCCUGUCA  
>P692  
UGCCAUGAGCCUCUGGGUGG**A**CAAGUAUCGGCCUGCUCCU  
>P693  
GGCUAGUUUGGAGGAUCUAG**A**GGACGAGGAGACUCACUCGG  
>P694  
CCUGCGGAAGGGAGGGGCG**A**AGGGCCGGCCGUUGCCGACG  
>P695  
GGUGAGUCAGCCACUGUCUA**A**ACGAUAACGGGAGGCGGUUC  
>P696  
GCUGCCUGAGGCGGCGGG**A**GCGGGACGCUAGGGAAAAGC  
>P697  
CGCGGCCUGGGGCGCCUCG**A**AGGGCGGCGGGCGGCUCGGG  
>P698  
GGAGAGGUUCCUUGGCAGC**A**GAGGACGCUAGGUUUGGGAU  
>P699  
AGAGGGCACCUGCGCUCGGG**A**GGUUUGGGCGGCUUGGCGUC  
>P700  
ACACAAUUCGGGGGGCCAA**A**AGCUUGACAUUGUGGUUCCUC  
>P701  
GGAGGCGAGUAAGCCAAAG**A**CGUGGACCUGACACUACCUG  
>P702  
CAGCGGCAGGCAGUUUUCGA**A**GGCGCGCACGAAAAGCAAAA  
>P703  
UUCUGAAGCUGUUGCUC**A**UUUCCUCUCUCUCAAUAA  
>P704  
AGGGCUCGCGAGUGAAGAGG**A**GGAAAGGUGUGGGCCCACC  
>P705  
CGGGGUCGAGCAGGUUCCC**A**GGAGCAGGUAGAACUGUUGC  
>P706  
GGUGCCGUCGGCGGAGAUG**A**CAUGCCGGCCGAGUGGGGAG  
>P707  
GCUCAGGCGGCGCAGCGG**A**AGUGGCGGGGCGGCGGGGG  
>P708  
GCGGAAACUCUGGCGGCUC**A**AGGCACCCGCCCGGACCUGGC



>P709  
AAACUCAUCGAGGAAGAAACAGCACGAAGAGUAGAAGAAUU  
>P710  
CCCGCACCCGCCUCUGCCGC AUCCGCUGCACCACGGCCCCG  
>P711  
CAACAACAACAACAACAACAACAACACAGCGUGCGCAAGU  
>P712  
CUGCCAGUGCUACCCUGAGAAGGUGGACGUGUAAGUCACA  
>P713  
CCGCUCCUCCAGCUGCGCCCAGGGCGCACGAGCCGGCCAGC  
>P714  
GGGGGGCGCCGGGAGAGCGAGGGCUUUGCAUUUUGCAGUG  
>P715  
AGCCCCGCAGCCGCGCAGGAACUCGCGGAUGUUGCUCAGGC  
>P716  
CUCCCACCACGGCACCCCGCACACCACCAUCAACUGGGGAC  
>P717  
GCGGGGGCGCUGAACGGCGGAGCGGGAGCGGCCGGAGGAGC  
>P718  
GGUCAAGUGCAGAGGAGCAGAUUAACUCGUCCGACGCAGAG  
>P719  
CCUGGCCGCCGCGCCCGCCAAGCCGGGGGGCGGGGCGGCU  
>P720  
CUGGUCCC GCCUGGGAAGGGAUGCAAGGAAGCCUCCGGCG  
>P721  
ACUGUCCAAAGGUUUUUGGCAGAGCUGCUUCCCGAGCGGG  
>P722  
AGGGCCGCCAGGACGGGAUGACCGGAGCCUCCGCCCGCGG  
>P723  
GCCCCGCAACCGGAGGACGAGUUGGCGGCGUCUCAGCCU  
>P724  
UACUUUUUAGGAACUCGUGGAUCAGCUCUACUCAUUUCGAG  
>P725  
GUGCAGGGUCCGGGAUUUGGAGUGGAUGGGAUUUAUGAAAGG  
>P726  
AGUCGGCUUCUCUACGCAGAACCCGGGAGUAGGAGACUCAG  
>P727  
UAGAGCUCCACGUGUCCGACAUCCUAGUCUCCAGCCCUGA  
>P728  
GUCGGCAAAGUUUGGCCCGAAGAGGAAGUGGUCUCAACCC  
>P729  
CUUGCUCGCGUCGUGGCCGAGCUACUGGCGAAGCUAGAGC  
>P730  
GCGCGGUAGCGGGCUCGUGGAAAACCCCGGUCUGUUGUGCU  
>P731  
GGAGAUUUUCAGAAGUGUCACGGCACUUGGCAGGUCGGAC  
>P732  
GGGGCAGAGGAGCGGAGUUGAGGCAGAAGCCAGGUGAGGCU

>P733  
AAAGCCGGGCACCAGACGGGAGGGGCGGCGCUCGGGCCGCG  
>P734  
CUGCUUCUCAGGAUCUCCACAGGAACUGGGCAGGGGGGCAC  
>P735  
GUUGCGCCUUCUCCAUCUGGAGGCCCGGCCAGCUCCGGGG  
>P736  
UCCCCUCCUCUUUCCCGCAUAAGCUUGCUCCCAACCUU  
>P737  
CGGCGGCGGGAGCGGUCCCCAGGAAUGUCGUGCCGCCGCC  
>P738  
AGGAGAAGGAGGGGCGGGCGAGCGGGUGGGCAGCGGAGAGU  
>P739  
CCUUCUCCACUACAAAGGCAACGAGGGGAGACCCCGUCCUC  
>P740  
CCCUGAUUGCGGUGCCACGGACUGCUCCUGCUGGGCGGAGA  
>P741  
GUUCAUAGUGAUGCAGAGAAAGAACAGGAGGAGGAAGAACA  
>P742  
CAUCCCGACCCUCUUGUUUAACUUUACAUCCCGAGGCAGCG  
>P743  
UGGGCAGCUGCUCACUGCGCAGCUGCUCCACGGUCCACGCC  
>P744  
AAAAGCUCAGCCGCGGUCCCACCCGCACCCUAGCUUCGUUA  
>P745  
CGGGGUCACCACCCUGGGCGACCCGGAGGUGGGCGCCUCCGC  
>P746  
CACGAACGGCGCCGCUUCCCACAUGGAGCCUCCGCCCGCA  
>P747  
CCAGGGAGCACCCCAAAGCAACAGCACCCAGGACUGCCAGGG  
>P748  
GAAGAGUCAGAGGGGUGACCAGAGAGCCCAACGCCUGGUGC  
>P749  
GGAUUACAACUAACACACGCAGACUACAGGGUCCAGUGAC  
>P750  
CCCCACCAGUGUGCACAGCACCGGAUCCGGAUCCGGCUUC  
>P751  
CUGCCACACGGAAGCCAAUGAGAU AUGGGCAUACAGAGGGA  
>P752  
CAGGCUGCGCCCGCGUCUUCAGGGCCAGUCCUCGGACCC  
>P753  
GACGCGGCGGCGCCGGCACUACAGCCCGGGCCGCCCGCUCC  
>P754  
CGCGUCCCUUUGGGUUUAGCACGAUGAGCUCAAUCGGCACU  
>P755  
GGGUUGUUGGGGACGGUUGAGCCUUGGGAGGGAGGGUCAG  
>P756  
CGGGCCAGCUCUCGGUUUCCAUAGGCUAACGUCUACUCCGGC



>P781  
UGUGGCUACGGCUGCUCCGGAGCUGGUGGCGCCGCGAUAGG  
>P782  
UGUCGCGUCCGCUCUCCUCAGGAGCAGGGAUGCCUCGACC  
>P783  
CGCCCGCACCGUGCGGGCGGCAGCAGCAGCCUCCGGGCUCCG  
>P784  
UGGGGAGGCACGUGAGAGGGUGAAAUCGGCAUGACAGGC  
>P785  
CUUGAGGCUGAAGAAAAGGCAGAUCCCAGAGAUACGGCA  
>P786  
GAGCUGCAGCCGGUGGGCGGCAGCGGCGGCAGGGAGCGGU  
>P787  
GCGGCGUGCGGGAACUCAGCACUGCGCGGCGCUUGGCUUAC  
>P788  
CCUGGCUCUGGCCUCGGAGAAGAACAUCGCGACUACAACAA  
>P789  
UCUAACAACUCAAGGACAAGAAAAGAAUAUGAACCUCU  
>P790  
CUGGGAAAGGCAGGACCUCGAGGCGCGGCCGCGGAGGUGA  
>P791  
AGGUGCCUGGCCGGGCCCGACGAGGCGCGGGAGGGCAGGC  
>P792  
UCAAAGCUCCGAACCAUCCCAGCCCCAGCAGAAGGACCCCC  
>P793  
AAUUUCUGCCUGAAAGGCGAACGUCUCAACCUCUCCUCCU  
>P794  
CGCGGGUUGUGGGCAUGAGCACGCCUGGAGAGGCCAUGGGG  
>P795  
GGGCAAAGGUCCCACGACGGACGCACGGGAGGGAGCCACCG  
>P796  
ACGCGGACGGGGCGGCGAGGAGGCGCCGUCGUGCCGGGGC  
>P797  
UGACCGCCUGGGCUUCUCAGAGGUGGAGCUGGUGCAGAUGG  
>P798  
ACAAGCCCAGCGAUGAGCACAGACCGACCUCAACCCCGAC  
>P799  
AGCAGGACGGCGGGAAGAGGAGUGCGGAACCCGCGGGAGGU  
>P800  
GCAGGAGAACAAGGACCGGAAGGAGCAGGCGGCGAAGGCAG  
>P801  
ACAGCGUCCUCCAGCCCCUCACUUGUGCUGUCGGCCUCGGC  
>P802  
CAGGGAGGGCCUGGGGCGACAGCGGAAAGGUUAAGCGUCGA  
>P803  
GACACAGAAGGACAGAUAGAAUGCCCAAGUUCAAGAUACC  
>P804  
CCACCGUAGGUCCCACCGACAGCCACAGGUCCCAUUGACAG

>P805  
GCCCCAGGCGGUGCUGGUGGAGAGCGGGCCCGUGUCAUACC  
>P806  
CGGCGCGGGCGGCCGGGAAAUGGAGGCGC GAUGGCGGGGG  
>P807  
AGGGGCCGUGUGGGCGGGCGAGGGGGCGGGGGCGGCCGCAG  
>P808  
CCCCUCCCGCUCAGCCGAGAAGGUGAGCUCCUGGGGAAGG  
>P809  
GAGGCGGCGGCAGCGGGUGGACCCCGCGGCUGGGGCCCGGG  
>P810  
CUCACCAGCCGGUGUGGCCCAUGGGGCUGGGCCGGGCCACC  
>P811  
UUAUCCACCCGUCCUCUCCAGCUCACCAAUCACUCGGCCU  
>P812  
AUGCUCGCAUCUCCACUGGACGGCGACGAAGGCGGUGGCC  
>P813  
AGCUGGGAGAGGACGGGUGGUAAGAGUCCAGUGGGACACA  
>P814  
ACCUGGGAGGAAGCUGGAGAAAGAUGCCUCUGAAUCUUU  
>P815  
GCACCAUUUCGGGGUGCCAAAGCAGCCAUGGAAGAGCCUGC  
>P816  
UUCGGGAGGCGGCAUGCCUAUUGGCGUCCUCGAGCAGGG  
>P817  
CAAUGUGCUGAUCCUGUACUACGCCUUCUCAUGGAGUACA  
>P818  
CCCGGUUCCUCGGUUUUUGCAACAUGUCUCCGGCGGCAGGU  
>P819  
UCCAAACGCUCUCAAAUUGAACUCCGCUCGGCUGCUUUC  
>P820  
AGGACGCAGCUGUUGCCAUGACGGCCCAGGGGGCCUGGUG  
>P821  
GGACCGCUGGCUUAUAAGCGAUCAUGUUUCUCCAGUAUAC  
>P822  
CUCCCGCCAUGAGCCAGGGAAGUCCGGGGGACUGGGCCCCC  
>P823  
UGAUGCACUGAUUGUUUUCACCUGAGCCUGGAGCUCUCCU  
>P824  
UUGCACAUUGAAGGAGGAGAAGAAGCAUGAUACGCAUCGGG  
>P825  
AAGGGUCCAAGAUAGGCAGAAAGAAAUGUUGCCAGUUGA  
>P826  
UUCUCCUUUCUAGGUUAAAAGGACCAUUGUUAGAAGAGCA  
>P827  
AGGCCGGCCGAAUGAAAUUGACCACCACCUCAGAAAUGC  
>P828  
GCAGGGGAGAUUAUGGUGGAAGAGGGGGUUUAUGGUGGAAGA



>P853  
CAGUGGCGGGACGGCGAGGAGGUGUUCGGUUUGCGCAGCG  
>P854  
CGGCCAGGGAGGGACGCGGACUGAAAAGGGAGGACACUAG  
>P855  
UCGCCGGUCGCCGCCGGCCCAGGUGAGUCCGAUGCGCUCGG  
>P856  
CAAAAUGUCUACUGUUCACGAAAUCCUGUGCAAGCUCAGCU  
>P857  
GCUUCUGCAAAGCUGUUGCCAGACGCUCCUGGGCACGAUCC  
>P858  
AGGGAUGGCUGAGCGUGAAGAUGCAGCGGGUGUCCGGGCUG  
>P859  
CGCACCAUGUCAAACAAGAAGAGAGGAGAGGAGAGAACGA  
>P860  
UCCACUCCGGUCCUGGUUGCAGUGGCUUCCUCGGCGGGCGGC  
>P861  
CCCCCCCUCUUCCACAAGUGCCUCCGGUGGGCCCC  
>P862  
UGCUCAGGUAGUGGAAGACGAGGAGGACGAGGAUGAGGAGG  
>P863  
CCAGACAGCUCGUCAGGCCACCUGUACCGUGGCAUCUUC  
>P864  
CAUGUCGAAGCCCCAUAGUGAAGCCGGGACUGCCUUCAUUC  
>P865  
CGAGUUCGACGAGGACGAGGAGUGCAGUGAGGAGGACAGCG  
>P866  
GCCGCGGGAGCCGAGCUUGCAGCGAGGGACCGGCUGAGGCG  
>P867  
CACCGCAGGUCCUAGGUCCCAGUCACUCUGCCGCCAAGUUC  
>P868  
CCGUCCAGUGGGACCAGCUACUUGGCUGACACACAUCGAG  
>P869  
AUGGAAGAGGAGGAGGUCCACAGUCGGGAACAUGAAGGGA  
>P870  
GCAGCCAGCGCGACGUUCCAAGUCCAGUCCAGUGGGCGGC  
>P871  
GGAGGGGCGCAGGGGUCCCCAGGGGGUGCGGUACAAAGAGG  
>P872  
GCUGAGGCCGCCCAUGGCAAGCCGGCGGUCCCGGCGACG  
>P873  
UUUUCUUUCUAGCCCUCCAACUGCAAGCACAUCUCCGGC  
>P874  
AUUGUAAAUGAAGAGGAAAGACAAGAAGCCCGAAUUGAAC  
>P875  
GCCUGUCCGGGUGACACAGCAGGGACCCCGGAGGCUCCUAC  
>P876  
CAGCCGGGCCGGCGGGCCACCAGGCCGUCCCGAUGCCCG

>P877  
AAAUAAAACAAAGCAAGACAAGGGCAAAAAAAGAAGGAAG  
>P878  
CUCGUCGGGCGUCCCGGGCGAGCCUUCGGCCGCGCAGGACC  
>P879  
GUUCGCUGUGACUUGUCACGACCGUACCGCGCAGCAGCGGC  
>P880  
UGCUGAGGGUGCGGCUGCAAGAGCCAGGCUGCGAGAGCUU  
>P881  
UCACCGCUGAGAGCAGCUGCAGUAGCUGAGCAGUGGCAGCA  
>P882  
GGUUGAGCGGGCUUUUUGGAAGUUUGUGGCGGAGGUGAGGC  
>P883  
GAUGGAGAAGGUGCUACAGCAGCGGCGGGCGCUGGAGGAGC  
>P884  
CGCGCACCUGGUACUCGGCCAGCAGCUCCUUGGACAGGCGA  
>P885  
UCACUCGCUGUGGGUUCGCGACCCGGGGGUGGCGGGCCCA  
>P886  
CCGAGCCCGGCGAGGCGGCCAUGGCGCGGACUCUGCGCGGG  
>P887  
GCUCGGAAGGAGGGCAAUGAGCUGUCAAUGUGGAGACU  
>P888  
AGCCGCAGAAACCGAAGCCGACCAGGCCCCCGGCCGCUCC  
>P889  
GGUCGAGACACGGUGGCUGCAGGUCUGAGACAAGGCUGCUC  
>P890  
CGGCCGACUGCUGCUCGCCGAUCCGUGGGGCCCCUGUGCC  
>P891  
CUCCUUUCUCCGGGUGCCGUACUGCCUUUUUCCCCUCUUU  
>P892  
GCUCGAUCAGCUCGCCGUCAGCUUGACCAUCCUGCAGCCU  
>P893  
UUGAGGAGAAGAUCAUCGGCAAAGUGGAGAAGGUGGACUGA  
>P894  
CAAUGGCCUCCUCCAGCGUGAGGCCACCCACUCUGCCUCC  
>P895  
UCCGCGCUCGGCCCGGCGCUACCCGGCCCGGUCGCCGCGCC  
>P896  
GCGGCCUAGGGAGGGCGGCGAGGAUCCGGGCGGCGGAUGGC  
>P897  
AGGCCAACCCCCAGCCACCAGCCAGGGCCAGCUGCCGAA  
>P898  
ACACCAUCACCAAGGGGCCAGCAAGCUGGUCGCGCAGCGC  
>P899  
CGGGGAACUCCUCGCCACCAGGGACAGGAUCAGCGACGUC  
>P900  
CACUCUCUGCACAAACUGGUAGCCAAGGUGGUUGAGCUCCG



>P901  
CUGUGCGGACUGUGCGUGGGAGCUCGGGGCCCCAGGGCGCU  
>P902  
GAGCCAGUGAGGCCCCUGGUACCCAAGCCCCUCCCCUGAC  
>P903  
GGGAAACAGGCCACCGCCAAAGCCAUGGCCCGCCGCGAGA  
>P904  
GCCCAGGCACCUUCCUCUUC AUGGGCUGGAGCCGCUUUGGG  
>P905  
AACCUGGAGUUUGCCCAGAAAGUGGAGCCUGCAACGACCA  
>P906  
AGGGUCGGGGUGGCCCGUAAGGCCUGCACGAGCUGGUCCA  
>P907  
GGGUCCGAGCUCGGCGUGUCACCCUCCGAGAGCCCGGCGGC  
>P908  
GGCUCUCCUGCAUCUUCCEAACGGUGUCUGUCCAGCCUG  
>P909  
CCCGGGCCGCCUCGCCGUCAGCCGCCUCCAGGCUCCACGGA  
>P910  
GCUGCCGGUCGCUAUCGGCCACACGGGCACGCUCCUUGGCC  
>P911  
CGGGCCGCGCCGUCCUCCGCAGCAGCGGCGCCGCCUCCUCG  
>P912  
CCGCGUGCGCGCCUUGCGGGAGCAACUGAACAGGCCGCGCG  
>P913  
CGCUUCCUCUGGCAGGGCCAGGCUCGCGACUGCUGGGGUG  
>P914  
CGUCUGCGUGGGGAGGAACUACGCGGACCACGUCAGGGAGA  
>P915  
GUGGUCAGUGAACUCCUGAUAGGGAGACUUGGUGAAUACAG  
>P916  
CCUCGGCCCCGGCCCCGUCCACGGCCGCGACCCCGGCCCCG  
>P917  
GUUGCCGCCGCCGCCGCUCCAGCUGAAACCUGCUAGGGUCC  
>P918  
UCGGACUCCAUCCUCACCCC AUGAGUUCUCUGGCUCUCCU  
>P919  
CCUGCCCCACGGGCGUACCUAGUCCCCGAGAACUCCGGGA  
>P920  
AGGGGCCGCCGAGCGCUGGGAGUCCUCCUGUGGCGUGGGG  
>P921  
GUACCUGUCCACCUCUCGUAGUCUUCGCCACCAACGACCC  
>P922  
CCAAGGAGAAGGCUCGAGCCAUGCGAGUCAACAAGCGCGCG  
>P923  
GGGUCGCCGGGGCCACCGCAGCUCCGCCAACUCCGCCAAC  
>P924  
UGCCUACUCCCCGCGGGACGAGGAGGACAGCAUGGUAGGUC

>P925  
GCUCCAUCCCCGCCCCACGCACACGGCGGGGGCGCCGUCCC  
>P926  
AAGUCCAAGGAUCGCUCAAAAAGAUAAAGGGGCCACCAAGGA  
>P927  
CCGCCACCGCCUCGGCCCCGAGAGCUUGCCCCUCCCCACC  
>P928  
UCCAGAACGAACAGCCUGACACAUACGCACGGGGCCGCCGC  
>P929  
UGAGGAGCGGCGGUGGCCGACGAGCGGCGGGACUGCGGGG  
>P930  
GGAGGCAUGGCCCCACUUGUAUCCAGAAGUUCCAGGGGUG  
>P931  
CCUGGGCGCCCUACCUGAUAACGGCGCCGCCUCCUGCGACU  
>P932  
UCCUCAGCCUGUUUGAGGACACCCUAGACCCAACCUGAGCC  
>P933  
CCGCGAAGACCCCCGACAUAAGAAGUGGUGUCCACCGCAG  
>P934  
GGGGGCUCGGGCGCGGACUAAGCAGGGGGGAUCUCCCGCGC  
>P935  
CGCCCCAGUCCAGCCUCCACAUUCCAGCCCGUCACCACG  
>P936  
GAUCAUUGUGAUGGGCGUGCAGGUGGUGGGCAGGGCCUUUG  
>P937  
UCCCCGGCCGCGGGGCCAGGAGUCGGAGUUUGAGCCCCGG  
>P938  
GAACCGCUUCAGGGUGUCCAAGUUCGGCACACCGAGGCUC  
>P939  
GCGAGAGCAGCAAGAACCACACCCAGCAGCAAUGUCAGCGG  
>P940  
GCCAGAGCAGUUAGCCAGUUAGUCCCCAGGCCUGUGGCCAC  
>P941  
UGAUGUAGACGUUGACCAGCAGGUCGGACGGCAGGGCAGGG  
>P942  
UGUCAUUCUGCCGAGCUCCACAUUGAUGCUCUCGGCAAAG  
>P943  
GCCUGACAGGGCCCAGGCGGAUGAGGUCUUGCAGCUGCGGG  
>P944  
GCCAGGAAGCGGCGCUCGAAACUCUGCAGCAAGAGUUCGGU  
>P945  
CUUUGCAGGGAGGAGGCAGCAGACACUGGAGAUGACAUCU  
>P946  
CGGCUCUGCGAGGCCUUGCGAGCGCCAGGGAGGCGCCACGA  
>P947  
CGCUCUGCUGGUCCGGCAUGAGACCGUGAGACGAGAGACGG  
>P948  
ACUGUCUCUUCAUAGGAUGGAGGUGCGGAUGGUGCUGAGGA

>P949  
CGCCGGCUCACCUCCGCUCACAUUCGCCCCGCGCCUU  
>P950  
GCUCUGAGGCCAGCCGCUCGAUGGGGAUCUGGGCGCCGGCC  
>P951  
GUCGGCGCGCUCGGCCAGGCAGCCUCUGACAAUAGCGGCC  
>P952  
AGCAGGUUGGUGCUGCGAUUAUCUCCUCGCAUCGUCUC  
>P953  
CGGGGAAGGUAAUGAGCCGCAGAGCCCCGGGGUCUCGGCUG  
>P954  
AGCGCAGGAGGACAUAGCUGAGGAGGAGCAGGACGGCCACC  
>P955  
AGGAGCCCCGGCGGGUCCGGGACUCCCGUCCGUGCCGGUGCG  
>P956  
GUUCUGCGCGUGGGACGCCCAGCCCGCUUCAUCUGCGCCCCG  
>P957  
CGGCAGUGACCGUGUGUCAGACAAUCUUGAAUCAUGAAGC  
>P958  
GGAGGAAGCCGAGAAGGAGGAGAAGGAGGAGGCGGCGGCGG  
>P959  
ACUCCGGCGCCGCACGAGGCAGCCUGCAGCCGCCCCGGCC  
>P960  
CAACCAUUAACGAGCUGCUUAAUGACGAGUUCUUACUUCU  
>P961  
CAGGUGGUGGUCCAGGAGCCAGGCCAGGUGUUCAAGCCUU  
>P962  
CCGCGCGGUCGAGGCCUGUCAGCCUCCGCCCGUUCAGCCUC  
>P963  
GUUAGGAGAAGAAGAGAGGCAGGGAAGACAAGCCAGGCACG  
>P964  
GCGACCUCCAGAAUUUCCUCAUCGCUGUCGGUGACCAAGUC  
>P965  
CCGCUCCUGUCCCCGACAUCACGUGUAUUCGCACGUCCCC  
>P966  
CAGCCACAGCCCACCUUGCUGAGGGGACCCCCGCACCCACC  
>P967  
UCGGCAGGCUCUUCUCCCCAGCGCUGGGGACUUCUCCUG  
>P968  
CCCUCCUUAUGCACCUCCAACCCUCCUCUCUCCUUUCUCU  
>P969  
GGUCCUGGGGAUCCCGGGGAAGGACCUAGGACGGAAGGCCU  
>P970  
CCGCCGACAUGCCGGGUAGCAGCGGCGGACGGCGAUCCAG  
>P971  
GGAUCAAGUGGCACAGACCAGAGGUGGGUGGUGGGCCAGA  
>P972  
UUAGCUACAAUCGUUCAGCUAUUCUCGGAAGAGAGAAGGGA

>P973  
GGAAACCCAGAACCAGGAGCAUGGCCGGAGAAAGUCAGCU  
>P974  
CGCCGUCCGCCGGCCCGUUC AUGACCGGCCGGGAGUGGCG  
>P975  
GCCUCUCCUGCCUCCUUCAACAGGGUUUCCCUUCAGGCC  
>P976  
ACCCUUCUGGCCUCGCACCACUGUGACUCUGCCAUCUUC  
>P977  
GGGUCCUGGGAGCCGCUUUAAGGCAAACACUCUUUGGAU  
>P978  
CUCAGAUUAUAUGAAGCAAAGUCAAAUAUUACCUGCAGG  
>P979  
CCAGGGAUCCACUGUCAAGCAGAUACCCUCUUCACUCCAAU  
>P980  
GCCAUUUCACCACCCACAGUGUGCCGCCGGCCGUGG  
>P981  
GGAGCCGGCCAAGGAUGACAUCAAGAAGGUGAUGGCGACC  
>P982  
UCACGGCAGUGCACUGCCGAGCAGGCACGACUGCUUCAUG  
>P983  
CCAGCUUGGGGAGCGGAUGGAGCUGACAGAGGAGCCACCG  
>P984  
UGUCAGAGUGAGCGGGUACGGGAAUCCAAAUUGAGG  
>P985  
UCUCAUUCUUGUGUUGACGGAGUUAUAGUUCUCAUCAGCUU  
>P986  
GUGCAAUUCAAUGCAGUCCGAUACCGGGAGAAGACGUGG  
>P987  
GCGCGCCGGGUCGGCGGAGAGACGCGGCCCGGGGAUGGGG  
>P988  
UUAGCACCUGUGAGAAUAUGACUUCUCUUGGAGGAAUGAA  
>P989  
AGGGCUCCGGUGAGAGCUGAAGCAGUAAGGAGGAUGCCCC  
>P990  
UCGCCACCUUCUCCCCGAGCACUGCCCCGGCCGCGCCAUG  
>P991  
UCUUCGCUCCAAGACCUUCCAGCUCACUUCUGCCGUGAGUC  
>P992  
AUCAUGACAAACACAAGGACAGAAAGCGGAAAAAGAGAAAG  
>P993  
GCGGCGCAGGAGCAGUUGGUAUCAUGGCGAGCUGAAGAGG  
>P994  
GGGUCCAUUUCGAGGCAAGGAGAAGCAGGAGUCCCCGAUCA  
>P995  
UCUCGGACCUGUCACAAAGGAGUCGCGCCGCGCCGCGCC  
>P996  
CGCUUGGCCGGCGGGCUGGAGGCUCCUGCAGCUGCGAUGC

>P997  
GCAAGGUGCGCGCUGAGCGCAACCGCGCGCGAGGAGGUG  
>P998  
UGAUGCUGUUCUUGGGCUGGAAGAUCUCGUUGUAGUCCUCG  
>P999  
CGUUCGCGGUGGCAGGGAUGAUGGCAGGCUCAGCCUUGGGU  
>P1000  
AUGGCCAGGCCUGCCAGGAAGAGCAGCCACCCCGCCUUU  
>P1001  
CGGGCGGGCGGGCAGCAGAAUCCCGUGCAGGAGGCGCGC  
>P1002  
UCCUUGUUGACCCCGGCCCAAGUCCCAUCCCAUCCCAUCCCA  
>P1003  
AGCUCGCAGCUUAGGAGCUGAAGAUCGCGGACUAGCGUUG  
>P1004  
UCUGCAGACCCAGCAGCAGCACUUUCCCUCAACUCUUCUCA  
>P1005  
UGAGACCUGUCUCUAUCUUCAAAUUCGCGUGCCUUCUCCG  
>P1006  
AGGAGGAGCCUGAGGAGGAGACAGGACAGAGCGUCUGGAGA  
>P1007  
GCCAGGGGGCCGGGAGCUGACAUGGCUGAAGCAAGAGGUC  
>P1008  
AAGAAGAAGGUGUGAGUGUGAGUGAAAUGGAGGCAACAGGA  
>P1009  
GGACGGCCGAGGCGCGGCGACUAUGACAACCUCGAGGGGC  
>P1010  
CAUUUCCUUCUCAGUACUGGACCCAUUUAUGAGGAGGUGGC  
>P1011  
GCGCCUACCCCGCGGGAAACCCUCCGCUCGCCUCCGCU  
>P1012  
GAGAGCGCCAACUCCUUGGACUCGUGCUCGCGUGCCACCU  
>P1013  
GAGCGGGCGCCGCGGGCCACGGGCGACAACCGAACCCUC  
>P1014  
GGCCCGCCGCUACUGCGGGACGCCCGCCUGCCAGCUGCCC  
>P1015  
AAUAGAAGAACAGAAGAGGAAAUGGAAAGAAGCUCAUUAU  
>P1016  
UCUUGCUGACAGCUGAAAUCACAGGGCAAGGGAGCUGGUGG  
>P1017  
GCCACGAGUCGGUGGCCAUAGUCCCGACAAGGGAGACCC  
>P1018  
UCCUCCAGGUCUGGCCAGCUACUAAGACGAUCCUCCGCCCG  
>P1019  
GCGGCAGCCUGGCGCCGAC AUGUGAAGGGGAACCUGCCAG  
>P1020  
GACGCGGGGCCUGAGCCUGGAGCACCAGAAGAGCAGCCGGG

>P1021  
GAAAUUGUUUGAAUAGGAGAAGUAGGUUUGGUUCUCGAGAA  
>P1022  
AAGGAGCAUGGCGUGGAGACACCUGAAAGUGAGUCCCGCGA  
>P1023  
GGGAGGGGGGCGUGUCGUUUGAGUGAGCGGCAGACUGCGAGG  
>P1024  
UGCAGAGAAGAAAGAAGGGCAGGAGAAAGAAGAGAGCAAAA  
>P1025  
AUCUCUGUCUCCUGCAGCUUAAAUACUUUUUGGUGGCAGCG  
>P1026  
CCGCGGCGGCCGGGGCGGGGAGAUGGCGGCGCGAUGGAGCA  
>P1027  
CAUCGGAAUGGGCAAGCGGCAGCUGCUGCAGGAGGAGGUGG  
>P1028  
ACUCCCAGCAAGGCUCAGCAAGGCCUCUACCAAGUCCCGGG  
>P1029  
GGCCCCGGGGCGGCGGCCAAGAUGUCCGUGCCUGUGAGUA  
>P1030  
GAAGUAAUGGUAUCCGGCCA AUUGAGAUUCGGAGUAAAAC  
>P1031  
GGGGAACUGCGUGUCCUCCAAGUCCUCCGCGCCCCGGGGG  
>P1032  
GGCCAGGUGCCUCCACAGUCAGCCAUGGCAGCGCUGCGCUA  
>P1033  
CGGUGAGUCUCGGGAGUCCAGGCCGUUCCGAACGCGUUC  
>P1034  
GGAACAGCUCUUGAGGAGUGAGACUGCAGGAGAUGUGGGCC  
>P1035  
UUUCCCAAGAGACCAUGCAGAGAGGCGGGCAUGCAUGGGGC  
>P1036  
UGGCGGCCGAGCGAAAGACAAGGUUGUCCAAGAAUCUACUG  
>P1037  
CGGUCUGAGACAUCACCGCCAGCUGGGCAUCGGGGAGAUG  
>P1038  
GGUCCUCUCCCCGGGGAGCAGGCAGAUGACUUUGGCAAGG  
>P1039  
CAGCCUGCUGAUCCAGCGCACCAAUGAGGAGGAGAAGUGG  
>P1040  
AGUCCCAAGCGCAAGUGGCAGGGAUCGAGGCCGUUUUUG  
>P1041  
GCCUCCAAGUGGGACUACGAAAGAACGAGUGGAAGAAGUG  
>P1042  
GCGCCUGCAUGCUGCUUCCGAGACGGCUCGCCGGCGCCUC  
>P1043  
UGCGGACGAUGUGUGUGUGAAGGGCGCGUCAGCCAUAAGA  
>P1044  
GGGAAGGUGAACACGGACGGACCGGAGAACGGGUGCUGGAA

>P1045  
CGAGUGGACGCACGGAUUCAAGGGGCGCUACGGGGUGCGGG  
>P1046  
UCCUCAAGCAAGAGAGACGGACAUCUGGUCCUGAGUCCCA  
>P1047  
GCCUUCCCGGGACCCACGAAGAAGAGCCUGUGGACAGACA  
>P1048  
GGUGCCGAGCUCCGCGUAGCAGAGCGCGCCACGAUGGAGA  
>P1049  
ACGAAGGGGAGGAAGACCGGACAAGCGACCUUAGGGAUGAG  
>P1050  
CAAGGAGCGGCAGCGGAGGAAGGAGGAGUGGGAGCGUGAGC  
>P1051  
CCCGCAGGACAGACAGACACAGACAGCGCUAGUGACCAGCA  
>P1052  
GAUCGGAGGCACCAUCAAGCAGCCGCCAGCAACCCCCCGC  
>P1053  
AGGGGGCAAGCGCGAUGAAGAGCUGGUUCUGCCAUCAACU  
>P1054  
GAGACUGCGGCUGUCGGUGGACGAGGUGAGGGGCGUGGGGA  
>P1055  
CCACCCAGGCGUGGUUUCAGGUGCACGCACAGGCCGCC  
>P1056  
GGCAGGAUCUGCCUCGCCACAACUCUCCUCGUCCUCCGCC  
>P1057  
CCUGGGCCCCACAGCGGCCGAGGACCCGGGCCUGGACCCCG  
>P1058  
GAAACAGGACUUGGGCGAGGAGGAGACCGAAGAGACCCAGC  
>P1059  
CCCCGACCCCAACCCCGGAAGCCGACGGCUGCGGCCUCG  
>P1060  
GCCGCGCCGUCGCCCCGUCCACCCUCGGCCACCGCUAAGG  
>P1061  
CGCCUGGAGCGAGCAUGGAGAGGCCAUCCGCAGAGGAGCGC  
>P1062  
GCGUCAUCGUCAUCACGGAGAUCGAAAUGCAAGGCGCCGGG  
>P1063  
CACGGGCGAGGGCAUGGACGAGAUGGAGUUCACCGAGGCCG  
>P1064  
GGCCCGUUUCCGGCAGGCCACCUC AACCCCUUCAACAAGC  
>P1065  
GGUCCAGGCUUGGGACCUUGACGCGAGGCGCUGGGUCCGGG  
>P1066  
CCCUCUUUGACUUUAAUGGGAUGAUGAGGAAGAUCUCCC  
>P1067  
GCAGAGCACGACGAAGACGCACAGGCAGCCGGGCCGGGCCG  
>P1068  
GUGCCCAGGGCCCCGCGUAGAUGGUACACAAGCUCCGCGGC

>P1069  
AGUUGGCCGACCAUGGCUCCACCGCCAAGACUUCCCCGCGG  
>P1070  
CCACAUCGCACUGAUUUCCGAGGGUAGGGAGGGGAAGCAGG  
>P1071  
ACGCGUAUGGGAUUACAAGAACAAGCGAUGCAUGAAGACCC  
>P1072  
GCCCCCAGCAUGGGCAGGAAGAAGAGGAACAGGACAAAGG  
>P1073  
CGGUCGGCAGGCCGGGCGCCACUCUGCGUCGCUUCUCCAGG  
>P1074  
CGGGCCGAGCUCACUGCCGAGAGACCCCCGGUCCCGCCAG  
>P1075  
ACCCCGCUGCCUCGGCGCCCAGGCUGCUCUCUCCGCGCAUG  
>P1076  
CCCGAUCCGGGCGCCGCGGGACCCAGCCGCGCUGCAUGAGC  
>P1077  
GUGAACGCCUCCGGCCCCAAGCCGGUGCUGGCCCGGCUC  
>P1078  
UUUCCGCGUUUUUUAUCCCCGUACCAGAAAAGGAUACAUUUAG  
>P1079  
GGCUGACACUUGGGGGCCAGAAUGUUCGGUGAUCCGGGAC  
>P1080  
CACCACAAGGUCAGCAAUGAUGUGUCCUCAGUCUCCCCAG  
>P1081  
CGCUGGCAGGGCUCACCACCACAGGCCCCUGCUGGGCUGCC  
>P1082  
GCCGCUCGGCGGCUCUGCUGAAUUCGCUUCUGUUCAUAGUA  
>P1083  
CCCCAACACGGAGUCCAGAUUGGGCCUGAGGAAGCCAUG  
>P1084  
GGCGACGAAGGCAACGACGAAGAAGCUGGUUUCUCAGCUUC  
>P1085  
AGGCGCGGCUGACCGGUGGGAUCUGCAGGUACUCCAGCCGC  
>P1086  
UAGGCGAAAUGGUCUUGCCAUUGUGCUGUCCACGGCCCCG  
>P1087  
GCCUUUGGGUGGGCGGUGGAGCCCCGGAGCGCGGGCGA  
>P1088  
AGCACCCCAAAGCCAGCCCCAGCUCCUGGCCCAACUUUCG  
>P1089  
UCAACCGGGCUGAGGCGGACACUUCUGUGGAGCGAAGCAGU  
>P1090  
CCAACAUCGGCUCUGGUGACAGCUGCUCUCCCCUCCACCUGA  
>P1091  
AGCCACCCUGGCGAGGGUAAGCCAGCGGAACGGGGAGC  
>P1092  
CUCUCACCUCGCGGAACGCACUGACUCGACCCCGUCCGCU



>P1093  
UUCACCUAGCUCCCUUGGCCAGGAGCGAGCGAAGCUGUGGC  
>P1094  
CCAGGGCGCUGCACCCGGCACAUUAUGAUGGAGCGGGAGCGC  
>P1095  
UGAAAGGGGGAUUGAGCCCCAGGGUUCACCCACAUCGCCC  
>P1096  
GCGCUUAGGCUUGUAGGAGUAGUAGGGCCUCCAGAGCUGGU  
>P1097  
UCUUCUGUGACGUCACCCUCAUAGCCGGAGACACCAAGUUC  
>P1098  
GUCAGGAGCUUACCCAAUCCAGGGAAGCGUGUCACCGUCGU  
>P1099  
GCAGAGUUCAGAGGUCGCGGAUGGACUCCAGCGUUUCACCA  
>P1100  
UCUUGUUGAGCAGCGCCUCUAGCUGCUGUCGGGCGCGCUCA  
>P1101  
CGAAGAGGAGGGAGAGGAAGAGGGGAGAAGGAGGAGGAGG  
>P1102  
CCCAUCGCAGCCCGCCUUCAGAUGUCCGAGCGCAGCAUCC  
>P1103  
AAAAGCGCGGGCCAAGUGCGACGAGAUGAGGCUGGGAACC  
>P1104  
CACAGGUUCGGAAGGGCCCCAGGCAGACAUGAAUUCUCCUG  
>P1105  
CCACCUCACUCCUCAGCCAAGCCUCCAGGCCCCUUCGUGC  
>P1106  
GCAGCAGGGGGGGCCGUGGCAGCGGUAGCAGACCUGAGGAG  
>P1107  
CCUGAUGUUCGCUACAGCCAGAAGGUCCGUCUGGGCCCG  
>P1108  
AGGGUGCUCAGGCCAGAUGGAGCCUGAGAAGGAGCAGGGGG  
>P1109  
UGCCCUUUCAGCCCAGGAACAGCAUGUGGUUCAGAGAA  
>P1110  
UCUGAGGCUGGGUUAUGGGCAUUAGAAAGGUUAAAAGAAG  
>P1111  
CCUGCAGCAGGUCAAGGCUGAGUCUGAGCACAAGAGGAAGA  
>P1112  
GCUGGCAGGCGGCCUGGAGGAUGGGGAGCCUCAGCAGAAGC  
>P1113  
GAGAAAGAGAGAGAGAGGAGAGAGAGAAAGAACGAACGAAC  
>P1114  
CCCAGUUAGACUUGGAGCGGAACUCAAGUUGAAUGAAAAU  
>P1115  
UUUCAUUCCCGUUGUUAUGGAGGUAGGCUCUCUAGGAAUCU  
>P1116  
GGGUGUGCAAACCCGAGAGAACUGGGUAAGUUGGGGUCGGC

>P1117  
CCGCGGCUGGGCUCCGAGAGACGAGUGGGAGAGCGAGUGCA  
>P1118  
GGAAGGGCAGAGGGGAGGCA AUGUCGUUCUGCAGCUUCUGC  
>P1119  
AACUCCAUCUUGGGUGGACAACACGCAGCGGCCCGGGCCCC  
>P1120  
GGGAGCCCUCUGAGAUCAAGAGCAGCUGCCUGAAGACUUC  
>P1121  
CGGGAAGGUGCGGCGUUGGGACCAGGGCCUGGAGAAGCCCC  
>P1122  
GCGGGUCUGGGACUGGUGGCACCGGCGGCGGCGUAGGACGG  
>P1123  
CGCCGACUCCAUGAUCCCCGAGGAGGAGGACGAUGAAGACG  
>P1124  
GCCUCAGCUGCAGAAGGAAGAAAGCGCCGGGUCUCCUGGCG  
>P1125  
CUAGGCCGCGCGCGGUUGC UAAGAGACGCCGGCGUUGCCCU  
>P1126  
UGC GCGGAGGCCCGGAGGCCACCCUUGAGGUCCUGGGUCG  
>P1127  
GCAGGAGCUGCGCACCGUGAAGAGGAAACUGCUGGAGGAGG  
>P1128  
UCCCCUGGAGCUGGACAUGACCCCUUUCAUGGCCUCCAGG  
>P1129  
GCCGGGCCGGACCCGGACCUAAAUGCCUCUGUUCUUCUCCG  
>P1130  
GAUUGAGAUUGAGGUUGUGCAGCGCAAGAAACAGAUUGCCG  
>P1131  
CCUGGGCCUGGGAACUCAUCAUGGCUGCCUCCUCACUUGGC  
>P1132  
UCGCCGGAGCCGGGCCGGGCAGCAGGGGCCGCCGCCGCCGC  
>P1133  
GCAGCAGGCACAUGAGCAACAGGAGCCGCCUAGCCGCCAA  
>P1134  
GCAAAGUAAAAGGGAGGAGAAAGAAGCAGGAGAAACGAGG  
>P1135  
CCGUUCGGUGCUGAGUAGAGACUGGGCUCUCUGGAACUCCA  
>P1136  
ACCAUGGCGCAUAACUUUCGAAACUCCCGUAGCAGACAGUC  
>P1137  
AGGAGCUGGGAGGAGGCGGCAGCGGCGGCGGCAGAAACAGC  
>P1138  
CCCGCGACCAAGCGAGGCGGACCCUGAAGCGGACCCCGAGG  
>P1139  
CACUGCUCCCAAGGUCAUCCAUUCCCUUGGUAAAUUCUCA  
>P1140  
UAGCCUGAGUCAUAAAGGGAAGAAACUGAGCAGUGGGAAAG

>P1141  
GGGGGCUCGGGAGCUGAGGGAGAAGGAGGGGCUGAAGGGGC  
>P1142  
GCCUCCUGGGGCCCCAGGGACCUCGGCCUGCCCCGCCUC  
>P1143  
GGAGGGAGGGAAGGGAGGGGAGGGGGCCGCAGCCGUGUCG  
>P1144  
AGGCCAGGCGGGUUUCUGUCAGGCCCGGGAGGAGGGGCGG  
>P1145  
UGAUCCCCUUCACGGAGAUGAUUAACAGGUUUUUGGCUCCU  
>P1146  
CACCUGGGGCGCUGCGCUGUAUGGAGACUGGGGCUGCAGGC  
>P1147  
UGGUCUCUCCUCCUUGGAUAAAGUCUUGAUGAUCUCCUCC  
>P1148  
AAAGGGGGCGUGAGGCACCUAGGCCGCGGCACCCCGGCGAC  
>P1149  
UGCCUGCUGUACAGUAAGUCACCGGCUGGGGAGGAGCCUG  
>P1150  
GGCGGCGGCGACGGCGAGAAAGAGCUUGCCGGGGGGCGAGC  
>P1151  
GACGCCUGGACAAAGGCUUCACCCUGGUCGAGAGGGACCUC  
>P1152  
AGAACCCCGAGCCGAGGAAAGCCCCACCUCCACCCUCAA  
>P1153  
UCUUUCCACCUCUCAGUGCAGGAUCCUUCUCACGUCUCUC  
>P1154  
CGCCACCGUGGCCAGCACCAGGAUGCGGAAGAUCAGCAUG  
>P1155  
AAGGGGCUCAAGAACCUGAAGCGACUAAACAGGCAGGAC  
>P1156  
UCGGGUCCUCCAGGAGCGCCAGGCGCUGCCGCCGUGUGCCC  
>P1157  
GGGGGCUGCUUUGGGGGCUC AUCAGGUGGCUAUGGAGGAUU  
>P1158  
GAUGGAGCUGGAGGAGGUGAACUGGCGGAUGGAGGUGGUCA  
>P1159  
CGUAGUCACCCUCCCCUCAACUCGGCGUCAGAUAGGGCA  
>P1160  
GCAGCAGGGGGAGCCGGAGGAGGCUGUGGCUGGGGGGGCCC  
>P1161  
GCGCACCCCGGCCCGCCUCACACGCGCGCCGAGCGAGCC  
>P1162  
CCGUCGCCGCCUCUGCCGGCACCCAGCGCUCCGGGGCCGCC  
>P1163  
GGAGGAGAAGAAGUUAAGGAGUUGGAGAGGCCUUUACUA  
>P1164  
GAGACUUUCAAGGAACAAGGAAUGCAUACUAUGCCAAGAA

>P1165  
GCUUCUGUUCUUCAAGGUUGAAAACUAAGCAUGGGGAAGAG  
>P1166  
AGAAGGCUUCGCCCAAAGACAUGAGUGGUUUCGUAGCGGGG  
>P1167  
CGCCAGGCUGUAGGUGUCCAGCCCGGCUUGGCAGCCAGA  
>P1168  
AGGACACCAAGGCUUAGAGCACAGCCCCGAGGCGCCGUCUA  
>P1169  
GGGUGAGCAUCAAGGCCCCCAUUUCUCCUCACCACGGGGUC  
>P1170  
GGAGCCUACAAGGAGUCCUCAAAGACCGGCGGGCGCGCG  
>P1171  
GUUCCCGCUGUAGGUUCCCGAACACAUCCUGGGAGCUGUAG  
>P1172  
UCGGCCUCAUCGCCUCGCUCAUUCCCACCCACGGCUCAC  
>P1173  
UGGGCUUGGCCCGGAGCCGCACGCAUUCGCGCUGUACGAG  
>P1174  
UAUCGACCCGACUCGGGAGAGCUGACACCCGAGCAACUGC  
>P1175  
UUCUUGCCGUUGCUCUCCUUCAGUCUGCAGCUCGCGGGACA  
>P1176  
AGCGUCCAGCCAGGACAAGCACACCUCUCCCAGGUUUCAUG  
>P1177  
UCUGGACCGAGGGCACAGUCCACCUUCCUGCCACAUCCU  
>P1178  
AUUGCUGUACGAAGGUCAGAAUCGCUACCUAUUGUCCAAAG  
>P1179  
CGGCACGACACCUGGCUCCCACGCUGAAGUACUCGCCCGG  
>P1180  
ACGAAGGGGGCAGCUGGAAGAUUUGGUCUUGAACUUGGGGG  
>P1181  
CUGCUGCCCAAGGACCGCGGAGUCGGACGCAGGUAGGAGAG  
>P1182  
GGAAGUUCUACACUCGCCUCACCAACAGCCGACACGGUGAG  
>P1183  
AGAGCUCAUGGAGCUCGCGAAUGUAAUACGGAGGCCUCUGA  
>P1184  
GGAGAACCACUGCGGGCUGGAGCAGCAGGCUGCCAUGGCC  
>P1185  
UCCAACUCCCGAACAGGUGGAGAAACAAGAUAGGAGUACUC  
>P1186  
GAGCAAGCAGGAGCUCAUCAAGGAGUACCUGGAACUGGAGA  
>P1187  
GCUGGAGGACACAGAGACCAAGAACGCUGUGCUGGAGCACA  
>P1188  
GCGCGGGAUGCGGCUGAAGCAUAGCAUGAAGCGGUCCUCCU

>P1189  
GGCUUUAGGGUGGGUGCUGCAGCAGCAUUUGGGGAAGGG  
>P1190  
AGGAUGAGCACAAGCCUGGGAGAUGGCAGUGAUGGAAAUGG  
>P1191  
GGGGCCUGAGGCACUGCAGAAAGUGGGCCUGAGCCUCGAG  
>P1192  
UCCAGUAGGUUAUUGUUGGUCACCCACCACUCUUUCCCGCUG  
>P1193  
AAACCAGCAUCCACCCAUC AUGCCUGCCAUCUCCUCCAG  
>P1194  
CACAGCAGGCCCUAAGCCCGAGUCCCGGCCUCGCCGCCGCC  
>P1195  
GCUGCGAGAUGGAGGCGAGCAGGACACCUGGGCAGGCGAGG  
>P1196  
UCCUCCUUCUGAAAUGAGACUUUCUGCCACCUUCCCUUC  
>P1197  
ACCAAAGCCCAUUGGAAGGAACAUCUGAUGAGGGACAGA  
>P1198  
CGAGCUGAUACUGAAGUACA AAAUAUCAAGAGGCUGGAGC  
>P1199  
UUUUCUUUCUGCAGACUGAAAAAUGCAGACCGCCGGGG  
>P1200  
GAGUUCGGGGAGAGCCCAGGAGAAGUGCCCGCGGCGCGCAG  
>P1201  
AGCCCCUUUUUUUGCCCAACGUCUGUCCUCAGGGCCGCU  
>P1202  
CACGGAUUCGGUCAAGAUGACAGCUCUGUGCCAGCAUCC  
>P1203  
CUCCUUCAGGGGAUGGGGGCAUCUGGGGAUAGGAAGGGG  
>P1204  
GAGUGUGGAGGAGAACAAGGAGCGCAUGGAGAAACUGGAAG  
>P1205  
GCAGACAGGGCCAACGUCGAGCCGAAUUCUGGUCUGGGG  
>P1206  
GGCCAAUGGGGCCAGGGAGACCGUUGAGUCCAUCUUUGCC  
>P1207  
GGACCAGCAUCGCCUUUAGCACAGCAUCCAGGUUCGCC  
>P1208  
GUUUUUGGAGCUACCACCCGACUUCUUGGAUGCGUAUCUGA  
>P1209  
CCGCUGAACUGACAAGCGACAUUUCAGCUCCUUACCCGC  
>P1210  
GCGGCUGGGCGGCAGCAGCCAGAGCGGCCAGAGGCGCCGC  
>P1211  
GGGAACAGCCGCCGAAGGAGCACCAUGAUUUCGGCCGCG  
>P1212  
AGGGAAGAGGAAGAAAGAGAAAAGAAAGGGCUCGUGACAG

>P1213  
GGUUUGAUCGCAAUGAAGGUACGCUCACAGUUGGCCAUGGU  
>P1214  
CAAGCGGAAGAGGGAACGGGAGGAGUCGCCAGGGGAUGCGC  
>P1215  
AGCGCUUGAUGAUCUCGCCCACCAGGCCGCGCUGCACGCCG  
>P1216  
AGAGCGGCCGGACGAAGAGCAGCGAGAGGAGGGGAGAG  
>P1217  
UCCAAGCCUCCUCAUUUCUAUCCAAGCUCUCCUCAUUGCC  
>P1218  
GAGCCCGGGCGGGGGGAGGAGGAGGGGAGGAGGGAGCGG  
>P1219  
CCGCCGCCUCGGCCUGUUCCACGGCCGCUUCGAGGAAACUC  
>P1220  
GACAGCGGAAACUCACCAAUCCCGCUGCAUUUCAAGCG  
>P1221  
ACAUGGAGGCGGAGGUCGAUAAGCUGGAACUGAUGGUGAGU  
>P1222  
AGGGAGAGGAGGAGAAGGGGAGGGGGAGGCUGGGCUCAGC  
>P1223  
UGAAGGGCUGGAGGCGGUGUAUGCCGCUGUUCUUGCUGUCG  
>P1224  
GCCACGCGGGCGCACGGCAGAGGCACGGCCGCCUGCCUC  
>P1225  
AACGGCGGCCCCAGUCCUGCACACAAGGCCGGGGAAGUAGC  
>P1226  
GCCCCUUGCGGGCGGUCAUCACAGCCCAGCCUCGGGGCUGC  
>P1227  
CAUGGUGGCCACGGGGCCGCAGUACGGGCGGGUCAACAGU  
>P1228  
GAACCACAAAGCAGCCUCUAAGGAGGAGGAGGAAGAGGAG  
>P1229  
AGUAUAUAGAAAAGCGUGCGACAAGUCGCUGGAAAUGGCCU  
>P1230  
CAGUCCCCGCGGCUUCCGCCACGUCCGUCCUCCUACAUC  
>P1231  
UUUCCCCGGGCAACGACUCCACGGCGUCUCAGGACGUGGCC  
>P1232  
CGCUCUGCUCACGCCUAGGAGUCCUUCAGGCCCGGCUCUC  
>P1233  
GGUUAUGAGACAAAGGGAGAAGCUAAAAGAUGGGGGAAGA  
>P1234  
GCCUGCCGCGUGGCUGUAGUAGGAGCUGGAGUUCUGGUGGU  
>P1235  
CGUCCCCUCUGCCACUGGACUUGGACUUCAGAUCUGACC  
>P1236  
AUCAAGGACUCCUGCUCACAGCCCCGACGAAAGGAUGCCAA

>P1237  
ACCUGGAACGGUCACAGGAAACCCGGGCGCGGGGUAGUCGG  
>P1238  
GAAGUCUAGGAUGGGGUCGGAGGAGGAGGUAGACGAGGGCG  
>P1239  
GUGGGGACAUUUGGCUUUGAACUCAGAGCUGCGCCUUUGGG  
>P1240  
ACGCCGGGCGCUGCACAAGCAGAAAGACGGCACUGAGUUCA  
>P1241  
UGACUGGGUAGCUUUUGCAGAGAUCAUACCCAGAACCAA  
>P1242  
CCGCAGGAGGCCGGCCUCGAGUCGGCCAGGACGCCGUCCA  
>P1243  
UUCGGGGUACCCUACAGUGACUGUUGGCUCGCCAUCGAGC  
>P1244  
GGAGGGGACGUGAAGUGAGGAGGGGGUUGGGAGGGGAGAGG  
>P1245  
UUCUGUUUCUCCAGGUCUCCAGUGGGGGCUGCAGACUAAGC  
>P1246  
UCUCGCAGUUUACGCGGAAGAUUCAGAGCCCGAGUCUGAUG  
>P1247  
GAGGUACAACUGGAAGAGCUAGAGGGUGAGAACUGCCAGGG  
>P1248  
CCGCAAACAGCUGGCCACGAAGCCGCCAGGAAAAGCGCUC  
>P1249  
GCGGCGGAGUGAUCGUCAAUAACACCGAGAGGUGAAAACAC  
>P1250  
CAAGGUGGAGAAGAAUCUGGAAAUGGUCAAGGCAGCCCAGG  
>P1251  
GUGGCAGUGGCGGCGGCGGUAGCGGCGGUGGACGUGGUGCC  
>P1252  
AAGGAGAGAUCCAGCUGCCAGUCUGGGGGUAGCAGACUG  
>P1253  
GCAGUUGCUGCAGGCGGCCACUGGCAGUUCGAGGUGCGAG  
>P1254  
GGGCAGGCGUGCCACUCGGAGAAGGACAGCUAGAUC CAGA  
>P1255  
CGCAGUCCGCAGGAUGACUCAGGGCAGCCCUGACCACAGUU  
>P1256  
UAACCCUACCUACUAGCCCUACCUACUAGCCCUACCUACUA  
>P1257  
UGAGUCUGGUGGAGGAGCUGAGGGAGGGAGCCAUGGAAGGU  
>P1258  
CAAGGCGGGCGGCUCUUCGACCUGCGGCGCUUCCUGACGC  
>P1259  
UGGAGAAUCAGUACUGUCCCAGCCGAUGGGUUGUCCGACUG  
>P1260  
UAGAGAUGCGGUGGUCCUUGAGAAAGGGCUGCCAGGCAGGG

>P1261  
AGGCACUAAGAAGCUCGUCUACUUCAUCGACGACAUGAACA  
>P1262  
CCCUCCACCACCCGCCCGUCAGCCUCGGUCUUGCAGGCCUU  
>P1263  
UGUCCCCACAGGGCUGUGUCACCUGCUCCCCAAUCAUCCAG  
>P1264  
AUGAUUCCUUGGUCCAUUCAGCAACGUCAAGGUGGUUCUG  
>P1265  
AGCUCACCUUGGGUUCUGCAACCAGCAGCCACACCCAGAA  
>P1266  
GGCGCUCCCCAGCCUGCCCCAGCAUCCGCUCCAAGUGCUC  
>P1267  
CCGACUCCGCCUCGCCGCCAGCACUGGACAGAACCCGUCA  
>P1268  
GAGCGGGUGUUCGCGGCCGAGGCCUCCUGAAGCGGCGCAU  
>P1269  
GCGAGCAUGC GGUCUGGAACACUCUGGGCCACCACCAGGAU  
>P1270  
GGCCUCCUCAAAGCCUCGGACCUCUGACCCUCACCCCCG  
>P1271  
GCACUCCGCCUCGUGCACAACCUCAACUUCAAGAUGCCCU  
>P1272  
CAGAGGUGGCAGAGGAGGCCAUGGAAACAGAAAGUUCUGAG  
>P1273  
GCGACACGGAACCACGGAGGAAGGGACAAUGUGGGCUUUAU  
>P1274  
GAAGCAGCAGCUGGAGCUGGAGAGGCAGGCGUGGGAGGCCG  
>P1275  
GGGCGGCCGCCUGAGUAAGGACUUCUGCGCGGGAGUUCG  
>P1276  
GGACGUAGCUGACCCGCCCGAGCCACUGCCCACUGAAGAGG  
>P1277  
UCCGCUGCAGGCUGAGCGGGAGCACGAUGCACAGCGACACG  
>P1278  
GCCUGUGAAUCUCCGAGCCCAGACCCGGAAGAGCCGCAGAG  
>P1279  
CGUCGGCCGAGCCUCACCUGAGUCAUCUUCUCUCUGUUGGC  
>P1280  
AGGAAGGCCUUGAGGUUCUCAUCAGCCACGUGCUCUCCAG  
>P1281  
AGGUACUCGGGGGGCAGCUCAGUGGUGGAAGUGGCCUUUC  
>P1282  
CUCCCGGGGAACCGCGUGUGACCUUCCAGCCCGCGGACCGA  
>P1283  
GCUACAGCUGAGAGGGGACGAGGCCAGGAGGAGCUCAGCCA  
>P1284  
GAGCAUCCAGGAGAUCCAGGAGCUGGACAAGGACGACGAGA



>P1285  
CCAUCCGGAACCGGCCGGCCAUCGCCCGCGGGCGGGCCGGC  
>P1286  
AGCACCUGCGGGGCCUGUCCAAGGAGGAGAUCGUCCAGCUG  
>P1287  
CCUCGUCCCUGGCCUGCGCCAGCAGUCUCAGCUUGUCCUCC  
>P1288  
AGGGCCCGCUUGCUGCGCGCACCUGCCUUCUCCUUGCUC  
>P1289  
GCCAAAGCUGCAGGGCUUCGAGUUCUGGAGCCGCACCCUGC  
>P1290  
CCAGGGCAGGUGGGCUGGGCAUGGCGCAGCGAGGAGCAGAC  
>P1291  
GUCUUCUUAAGGAGCUCAUACAGGAGUUUGGAUCGGCUA  
>P1292  
UGGAGAGAGAGCGGAAAGUGAGUAUGCGGCUGCACCGCGGG  
>P1293  
AGAGCAGGAGUGCGGUGAGCACAAAGCCAGCCCCAGGCC  
>P1294  
UUUGCUIUUUAAGGAAUGUAGUAAGAAAACAAAACUGAU  
>P1295  
AGCCGGAGCAGCCGGAGCUGAAGCGGAUCAAGACAGAAGAC  
>P1296  
CCCACCUCGCCGAGGUCGAUGACCUUCAUGGGCCUCGGC  
>P1297  
CGGCUGCCCCGCGCGCCCCAGGCCGCCGCGCCGCGCCCC  
>P1298  
CAGUUCUCCAGUUUUUCCAAAUAAAUAUUGGCCCCGAGG  
>P1299  
CGGCCCUUGCCCCCGCCGCACAGGAGCGGGACGCCGAGCC  
>P1300  
UCCUUUCCUAAUAGGACUUAACCACCACCAUGUCGAGCAA  
>P1301  
GGGCAUGGUUCUAGGUCAGGAGGUCCUACAUCAUGACAGCC  
>P1302  
CCGCCACGGCCACGGCCGGCAGCUCGGGUCCCGGGUCCCGG  
>P1303  
ACAGCCGCAGGAUCUCCUCCAGGCUCAGCGGUCCCGGGAG  
>P1304  
CUGCUGGCCACCCACUGCGACCAUGUUCGUUCCUGCGGG  
>P1305  
CAAAGCGUGGGUCCGCGUGCAGGAACCCGCCGGGCUCAGCC  
>P1306  
GAGAGACAUUAUCGCCUAGGACCCCUCUCCUCUGCCACG  
>P1307  
AAUACUUCACAAAAAUCCAUGGACAAGUCACUCGAGUUU  
>P1308  
UCGCGCGGGCCCCGAAGCGGAAUCCGUUCCGGGUGUCUCU

>P1309  
CGCGAACACGCGGUGGUUUCAUUGGGUUGGCUGCCCCUCGG  
>P1310  
GCUGCCCGGGCCGUAGCCGUAGGCUAGCCGCGGUGCGCUCG  
>P1311  
AUUAAACCUACCUUCCAUCAAUAGCAUUAACCAAGGGCAUC  
>P1312  
CGCGGACCACGGCCGCAGCAACGCGCACGGACAGCAUCUUU  
>P1313  
AACAAAGCCCCGGCAGCGAGCAGUGGGUCGCGGUCAGAGCCC  
>P1314  
AGGAGGCGAGCUGCGGGGAGAAGGGGCGACGGACAGCCGAG  
>P1315  
GGGAAAGUAUGGCUGCGAUGAUGGCAUUCUUAAGGACACCU  
>P1316  
GAAGGCCUCCGUAAGCUCCAAAGGGCGUUCGCUUAGCAGCA  
>P1317  
GGAGGAGGAGGAAGGGGAGGAGGGCGAGGCGGGAGGUGCAG  
>P1318  
CUGGCGGCUGGCAGCAGCACAGACCCCAGGGACCCGCCCGG  
>P1319  
CGGCGACGACGACGAGGAAGACGCCGAGGCCUGGGCCAUGG  
>P1320  
AGAAGACGAUCUGGGAGAGGAAGGAGAGAUGCUCAGGAAGG  
>P1321  
CUGAGUCUCACCCACCUAGCACCAUGCCUGCAGUGGCCUCG  
>P1322  
CGAGAACCACCGGCCUCCCCAGUUUGAGGGCUGUUACCCCG  
>P1323  
CCACCUGGGAAGGAAGGCCACUAGGCAAGGCCUGUUACC  
>P1324  
CUAUGCCCCGGACACAGAGGAGUUGGAGGCAGAGAGAGGAG  
>P1325  
CGUCGGGGUUCGCGGGGACCAUGCAGCGGAGGUGGGUCUUC  
>P1326  
ACCAGAAUGACAAAGGCAAGAACGUCCGCCAGAGGAACUCU  
>P1327  
GGGCGAGCUGGAGGAGGACGAUGACGACGAGGAGGAGAAGC  
>P1328  
GUGCGGCCCGGAGGCGGCGGAGGGCACCCCGGGCGGGCGGC  
>P1329  
GGCAUAGGGACGUGGGGUGCAGGCGCCAACAUCAGUGGCAG  
>P1330  
UUUGUGCGAGAUGCAGCCUCAGAAGGAACAAGGCCCCCAGA  
>P1331  
AGCUCGUCCUGGGUCACCAGAUAGCCACGGUCGUGGCACAG  
>P1332  
AGUGCCGGUGGAAGGCUCCAAAGGGCGUGGGCAGGGGCUCGG

>P1333  
CGAUGCGGCCCCACACGCGCAGCAGCGCGCCGCACAGCAUG  
>P1334  
CGGCAGCCAGCCCUGCCCAGACACCAGCUAUGCCCCCGUGG  
>P1335  
UUCAAAGGGCGGGCGGGCGCGACCGGGACGCGGGCGGGUAA  
>P1336  
CAUGGCAUCAGAUGAAGGCAACUUUUUGUUGGAGGGCUGA  
>P1337  
ACUACGCCUUCCCACAGAUGAUCACGCCCCUGGUGACCAA  
>P1338  
GCGGCUUUGGACGAGGGCAGACCACAACGUGCAAGGGUUC  
>P1339  
UCGGGGCCAUGGACGGCCUGAGGCAGCGCGUGGAGCACUUC  
>P1340  
AGGACUACGGCAGGGGAUGCCACCGCCUACCCGUCGCAAG  
>P1341  
AGUACUGGGAGGUCCCCUUC AUGCCCGAAGGGGACAGGGGC  
>P1342  
GUGCCCGCCCUGGCCCCAGGAGAAUGAACCAGCCGCAGAGG  
>P1343  
CCCUUCCUUCUCUCUGGCGAGCAGUGGCUAUUGAGGAUC  
>P1344  
AGUCUCGUGGAGGAGGAGCGACCGAGUGGCCCUUGGUGGUG  
>P1345  
GGGGCGCACAGCCGGGGCGCAGCCCGCGCCCCCGCCGCGA  
>P1346  
UGCAUGUGUGCUUACACCAGACCGAGGGCGGCCGGCUCCA  
>P1347  
CAGAGGACCCACACAGAUGGAGGGCGUGGCGGCACAGGACG  
>P1348  
CCCCCAGGGAUGCCACUCCAUUCCUCCGCCCCGUGGUCUG  
>P1349  
GAUGCCGGGCCCUCCAUGCUACAACCUCUUGUUCUUGCUCA  
>P1350  
CGGUCGCACAACUUGGAGCGAGUUGCUCGGUUCCUCAUUU  
>P1351  
UGCACUUUCCCUGGAGUGGAGCUGCUGGAAGGCGGACCGG  
>P1352  
GAACGUCAUCAUCUCCACCUACGGCGAGGGCGAGAGCGGCC  
>P1353  
GAAGCUCCUGGAGGAGGAGGAGAAGAGGGUGCAGAAGGAGC  
>P1354  
CCGCGCACGCUGGGUCCCCAAGCUGCCUUUGCCGCGGCCGG  
>P1355  
AUCGCCCCGGCGGCAGCUCGACCUCCUCUCAGGCGGGCGGAG  
>P1356  
AAGAGAAGGAGCUUAAGGAAAGGAGAGGCGGGAGAAGCGG

>P1357  
CCCUCGGUCUGUUCCCAGGGAAAAGGCCACAAAGAGAAGC  
>P1358  
GGAGGAGGAGGAGGAAGAGGAGGAGGAGGACGCCGACCGCG  
>P1359  
CGGGGAGGAGGCCCCCCAGGAGAAGGCGGAGGACAAGCCCA  
>P1360  
CCUUCUGCGGAGGGACGAUGAUGAGCCUGGCCCUUGGACGA  
>P1361  
UGCACGCCGAGGGCGGGGGAGAGCGCGCCGUCUCCCGG  
>P1362  
GCUGGAGCGGGAGCGCAUGGAGCGGGAGCGGCUGGAGCGCG  
>P1363  
GCGUCCUGAUGGAGCGGCUCAAGAAGGUGAGGCGGCGGG  
>P1364  
GAUCCGACUGGAGGAUGGACAGACGGCGGACGGGCAGACGG  
>P1365  
GCCGGAGGCCUGACUCUGGGAGCACGCAGUGAGUGGCCCC  
>P1366  
GUAAAUGGCGGACCUGGCGAACGAAGGUAGGGGAGGCGCC  
>P1367  
AGCCAGCCGGGCCAUCCUGCAGCGUGCAGGCGGCCGCCU  
>P1368  
GGUCAUUGGCCGGAGUGGAGAGAUGAUCAAGAAGAUCCAGA  
>P1369  
CCGGCGCAAGGCCUUCUUGCACUGGUACACGGGCGAGGGCA  
>P1370  
CCGCCGCCGCGUCCACCCUCAGCGCCACCGCCAUGCGGGAG  
>P1371  
GCUGCUGGUUUUUGCCGGGGAUUUACUAUCACGUAGUAGUG  
>P1372  
CCACUCCGGCCCCGAUCAUCACGCCAAGCACCUGAGGGACG  
>P1373  
GCAGCAGCGGCGAGCAGAGGAGGCGCGGCGGCGCAAGCAGU  
>P1374  
GGACUUCACACAGGUGUUUGACAGCUACGCCAGUUCGAGG  
>P1375  
UAUGUUCUGGGUUUCCAAUCAGGCCGAGUGGUUUGAGGACG  
>P1376  
CCAGACAGAGCUGUGAACCAACCCCGCUCACGGCUAACAAG  
>P1377  
GGGCGCAGGCGGAAGCUGAAACGCGCGGGGCGGGCGGCACC  
>P1378  
CAGCAGGGGCAGAGCUAGGUUUUCAGGGGCGGGGUCUUC  
>P1379  
UCCUUGAACUUAUCUCCCGCAACUCCGUUCUCUUCGGAG  
>P1380  
CCGGGCCGGGACCGGGGCCGAGGCGAACCGAGGGGCCUGUG

>P1381  
AGGAAGCGUCCCUGGGAUCGAGAGGAUGGGUCCUGGCAUUG  
>P1382  
UCCGGGGAGGAGGUGGCGAGAGGCCAGCAGUGCCCCGUUG  
>P1383  
CCCCCGCUUUGUGUAGCUCCAGCUAGGAUGAUCGAGGUUGU  
>P1384  
CAUGCAUACCAUGGGGGCCAAGCUGUUGAGUACCAGGAGG  
>P1385  
CCUGGCCUGGGCUCUCCUGGGACUUGUCCUUGGUCUUGGGAA  
>P1386  
UCCAUGCAGCCCAACCGCAGAGGUGAGGGGCACCCCGACGC  
>P1387  
CACGAAAGCCACCACCACCAAGCUGGUCUACCAGAUCUUCG  
>P1388  
GUCCUUGCGGGGCUUCGAGCAGGAGCGCGUGGGCCUGGCCG  
>P1389  
AGGAGAUGCACAAGAAGGAGAGAGCAUGCCCUGGAACGUG  
>P1390  
AGAGCUCAAGCAGCUGAAGAACCUGAAGAGGAAGGAGAUUC  
>P1391  
CAACCGCUACCGGGAGCGCGAGGAACUGCAGCGGCGUGAGU  
>P1392  
CCCGGGCCGCCGCCACUCAGCCGGUCGCCGGCGCGAACC  
>P1393  
ACGAAAACCUACUACCCAGCCCUUCUUUACUGUCGUC  
>P1394  
GGUCUCUCCUUGCAGUUCAGAUCCACCAAGCACCACCUAU  
>P1395  
CGGCUGAGGAGACCGAGGCGAGCCAGCAGUGGUGGCCCU  
>P1396  
CGUGGAGACCCCUAUGGCUACCGCCUGGACCUGGACUUC  
>P1397  
GCCACGCCUUGCUGCGGGACCUGUACACCCUGAGUGGAC  
>P1398  
GGCGUCCAGAAGCCGCCGAGCUCGGCUCAGCCAUACGCG  
>P1399  
CGCUGCCGCCGAGGAGACACUGUACACCGCGCCGUCCUC  
>P1400  
CAGAGCAGCUGGCUGCUGCCAGGCCAACAGGAGCAGGAG  
>P1401  
UCUAGUGCCCGUGGCCGGGAUUCAAAGCCGCGUCCCCA  
>P1402  
AACGAAAGCCGCCUCCAAGAGAAGAUGACAGGCACCCUC  
>P1403  
UACCACGACGACUCAUACACAGCUACGGGAUACGGCCGGGC  
>P1404  
CCUCUUUGAAGGCGCAUCAACCACCGCUGUGGCCUUGAAG

>P1405  
UUGUCCUCCUCAUCCUCCUCAUCCUCAUCUUUGUCCUCAUC  
>P1406  
CCGGCCCCUCUGGGACCCAGAGC GCGGCGUCCGCUCCGCCA  
>P1407  
AGCGGCAGCCUCUGAAAAGAAUCGGGGCCCAAGAAAAGGCG  
>P1408  
GAGAGACCCGGAUGAGGAUGAGGAGGAGGGGACGGAUGAGG  
>P1409  
AAGCAGGUUGCUGGGCCCAAAGGGAAGGCCCCUCCUGUGCC  
>P1410  
GGGUCAGAGUGCGCACGGCAGC GGCUGCCAGAGGGUCCUG  
>P1411  
CACCCACUGGGUGCGUGGUGAGGGGUGCCCGGCGGAGCGGG  
>P1412  
CCCGCCGUUCUCCGCUGGAGCAGCCUCCGCUCCCGCUCA  
>P1413  
UGGCCCGGACCCCCAAACAGAGUUCCCCCACCACUGAG  
>P1414  
CGUUCUGCUCUGGGGGCCGGAUCACAGGCCUCCCGACAUC  
>P1415  
AGAGGAAGUGGAAGAGAAUAAAAAAAGCAAAGCCAAGGAAC  
>P1416  
GUCGUUCCUGAGCCCUGUCCAACUCCUCCUCAACGAGCUGG  
>P1417  
CGAGUCCGGCGGCACCGACGACGACCUCAACAGCGUGCUGG  
>P1418  
CUUCGACUACCCCCAGGGGGACUUCCUGCCGGUGAGUGUA  
>P1419  
AUGCCGCAGAUGGAGGCUGAAGUCAAGGCCACGCCUCCACC  
>P1420  
GUGCCAAGAAGAAGGAUAAAAGAGUUCAAGGUAAGCAGUGU  
>P1421  
GAGGCGAUGGCAGCGGAGAAACGGGACCCGGACGAGUGGCG  
>P1422  
CGCCGCUCGCCACUGCCGCCAGC GCCGAGCCCGGGGGGCUG  
>P1423  
CCCCGCAUAUGUGGUCCGCACCAUCCUUGUCUACAGCCGU  
>P1424  
CCGAGGCGGCGACGGAGGAAACAGAAGAUGGUGAGGAUGGC  
>P1425  
CUCCACAGGCGCCUCCUGCCAGGUCUGCUCUCCGUCGCC  
>P1426  
CAAGGAGGAGGACGAGGACGACGAGGAGGAGGAGGACGAGG  
>P1427  
CCAGAAUCCUAUCCCCAGCAGAAGCUUACAGCGCUUAUCC  
>P1428  
CCACUCACUGCAUCCUGGGAACCUUCGCCUCCUGCAAGGCGUU

>P1429  
GCUGGGGACACGGUUUGGACACGCGGAGAGAAGGCACACGG  
>P1430  
ACGGUGGCCGCGGUGGAGCCACGGGGCGGGCUUGGCUUGGU  
>P1431  
GCCCAGGCCUCGGACAACAGAGAGAUCGACAAGCGCAUGAA  
>P1432  
CGCGGGGCGAGCUUCUAUUCAGGGCCGCGCGUCUCGUCA  
>P1433  
GCUGAAGACGGCUCAGAAUCCACCCCAUGGUGAGUACUCAGU  
>P1434  
CCCUUUGCCUCCGAGAGCUAUGGAGGUGGCAUGCGACCCC  
>P1435  
CCUCACUGGCAAACCAUCCACCCUUGAGGUCGAGCCCAGU  
>P1436  
UGCGCACGUGGCCGCGGAGCAGCGGCUGCCUGCGAGGCCCG  
>P1437  
CGAGAAGAUCGCGCUGCACAUCAGAAGCAGCGGAGGAGA  
>P1438  
GGUCGGGAGCGGGGAGGGGAAGUGGAUGUUGGUCAGGUCGG  
>P1439  
GGAACCGGCCCGAGGGCCCUACCCGGAGGCACCAUGAGCGU  
>P1440  
GCUGUCAGGACCAUGAAGCCAGGACAGAGGCCAGGAGCCAG  
>P1441  
CGACGUAAAGAACGCCUUCUACAUCGGCAGCUACCAGCAGU  
>P1442  
CGGCGGCGUUGGCCUCUCGCAGGGCGCCUGCCAGCUUGUUG  
>P1443  
CUUCCUGGUGAAGGAUGUUCAGUUUCAUUUUUCCAGAUUUA  
>P1444  
GGCGCUGCGCAAACAGCUGGAGAAGACGCUACUCGAGAUC  
>P1445  
UGCUCAGUGCCCGUAGAUCAGGGUUCCAAUCCUAUGGCC  
>P1446  
AACUCCCCGAGCCAGCAUCCACCACAUCAAACCCACUGAGU  
>P1447  
GCGCCGGAAGCGGUCCGAGAUGAAGAGUAAGCGGGGCCGC  
>P1448  
GAAGGAGCGGGACACCAUGAAGGAGGACGGCGGCGGGAGU  
>P1449  
GGUGGGCAAGGACGAGGGCGAGGGCACGGCCGGGUCCUGGC  
>P1450  
GGUGCGGCCCGAGCCGACCCAGGCCUCACAGCCC GCGAGUC  
>P1451  
AAGGUACCACCUCUGCCACCACCACGCCUCUGCCACCACG  
>P1452  
UGGCAAUGUGAGUCCAUCAUGUUGGAGACAUACCAGACG

>P1453  
CUCCUCGGCCCCAGGCGGGGACGGCCCAGGAGCGGAGGAGC  
>P1454  
AGCGGAGGCGGAGGGACAAGAUCAACAACUGGAUCGUCCAG  
>P1455  
CCCCAUCUCUUCGACCGCCCAGCAACCCAGUUCCCGCGCUU  
>P1456  
CUGGGACCUGCAUCGCUUCUACUGUGGGGACCGUGGGGACA  
>P1457  
CCUGGCCAUGCCAUUGCCCGAGCCUGAGCCCCUGCCCCUCC  
>P1458  
GGCGACGAGAACGGCGAGCGAGGGGUCGAGCGCGGCCGGGG  
>P1459  
GCAUCUAUGUCAACAAGAUCACGCACGAAGUGGAGUGAGUG  
>P1460  
CACUCUAACAAGCUCUGUCCACGGGUCUCCCCAUUCCCACC  
>P1461  
UCUCUUCUUGGCUACAGAUGAAGAUUCGCCCCGACUCGUCG  
>P1462  
GCCAGCUGGAGAUCAACUUCACACGCUGCAGACCAAGCUG  
>P1463  
UGUGACGUCUGCGCAGAAACUGUUCUGCAUGUCCAGCUCA  
>P1464  
CUGAAGCCCUUGAGGCUGUCCACCGACCGCUCUGUCCCGUCA  
>P1465  
CUGCGUCGGCAGCUUUUCCCAGCACGCGACCCCAGCCAUG  
>P1466  
CUUUCACCUUUGUUCUGGGAGGCAGUCGAGGGGCUCCCCCG  
>P1467  
GGCAGUCAGAUCCAUGGUGUACGGUUGGCCAUGAGGGGUG  
>P1468  
GCGAGAAGGAGCUGGAGGACAGGGAAGGGCCGGCCAGGCCU  
>P1469  
CAGGCCGGUCUGGGGCCGGGACACGGACAGUGCUGGGAUUC  
>P1470  
ACUCCACGUCUCCACUCCGAGACCCAGCCCCACACGCACC  
>P1471  
GAGGAGCCACAAUGGGGCAGACAGAAGCGGGGGCGCGGGGA  
>P1472  
GCUGCCGCCGCCACCACCGCAGCAGCAGUCGGGGAGCC  
>P1473  
ACUUCGGGGGACCGGUGGACAGCUGGGCCAGACUGUUGGUU  
>P1474  
GGUCGUUUGCACC GGAGGUUACCUUCCGACAGGGCCGUAGU  
>P1475  
UUGGAGAAACCCAGGGCUAAAGUCACGUUUUCCUCCUUA  
>P1476  
CACCCCCACCGUCAGCAGCUACAGCCUCCACAGGUGAGAG



>P1477  
UCGCCACGGCCUCCAUCCUGAUUCUCUCGGACUUUUAACC  
>P1478  
GCAGCCAGGCGGGUCCUGGGAGAGGCGCGAGCCAGGCCUGG  
>P1479  
UGCUGGUUCACGUCUUUACAGUAACUCCAGGCAUCUGAGG  
>P1480  
UCAGCAGCUCUGAGAACGGCAUUGGUGGCCGAGAGACGUCU  
>P1481  
GCCGGUGCCGCCUGGGCCGGAGGCCGAGCCUCCGGGGCCGC  
>P1482  
GGGCCUGCAGGUACCGUUUCAGUCCUCAGGGCUGAAGGAG  
>P1483  
CCGGACCAUGUAUUCGGCCCACAGGCCCCUGAUGCCCGCGU  
>P1484  
AGCUGACCCCGGUGCCUGUGAGCACACCAGCGGCCUGGUG  
>P1485  
CCCCCCAAGCCUGGUCUACACUGUGGCCACCAGCACAACC  
>P1486  
CCUUGCGGAGUCUCUGGCGAGACCCUCUAGGCGAUCCCGU  
>P1487  
CAGACCCGCCGCGCUGGCUCAGCUGCCGCCGGGCGACCCUC  
>P1488  
CGAGCGGGCGCCGGGAAGCGAGGAGACGCCCGGGAGGCC  
>P1489  
UCCAGCGGGCGGCAGCGUGAAGCCCGCGCGAGGGCGGAG  
>P1490  
AGGUGACCAGCAAUGGCAGCAUCGGGAGGGACCCGCCAGCG  
>P1491  
CGCGACUCAUGUCCCGCCGCAAGGCCGGCAGCGCGCCCCGC  
>P1492  
AGGAGAACUGCUCGGGGUAGAGUAGUCGUACGGGAAGUAG  
>P1493  
UCUGGCAUCCGGCUUCCUGACUCUGCUUCUCCUCUUCU  
>P1494  
AGAGGAGCUGCAGAAGCGAGAGGAGGAGGAAUUAACACCG  
>P1495  
GCUGUGCAGAAAGGGUGCCUAGGGCGUGAGCCUCUGGGAGA  
>P1496  
CGCUCGCCAUGGCUGCUGUCAGCUUGUCCCAGGAAAGAAG  
>P1497  
GAUCUGGUUCUCUUCGAAUGAGAAGCGCGGCUUGCACAACC  
>P1498  
GCGGCGCCAAGUCACCACGGAGAAGCGGGAGGUGCUGGCGG  
>P1499  
CAUCCAGCCUCAGUGUCCAGACCCAGGCAGCCCGGGUC  
>P1500  
CCAUCGCCGCCGCCCAUCACGCCUUCGCCUCCUCCGUG

>P1501  
UCUUGGGCUGGUUCCUCCUCAUCACCUUCUUCCACCUCGAU  
>P1502  
CCGGCUCUGGAGGGAAUCGAACCGUCCCGAGACGGACACAC  
>P1503  
CCUGCGGCUGCUGGAGGCCAGGGGCAGGGGUGUGCUGACC  
>P1504  
GCAGAGGAGGUGGAGGAUGGAGGGAGGUGGGGGCUGGGGG  
>P1505  
GGCCAGGAGCAGGCUGGGCAGUUCCAGCCACAGACACGUG  
>P1506  
GGAGCAGCAGCGGCGGGAGAAGGCUGUGCACAGGCUGG  
>P1507  
GGGCGUCCGCUCCUCAGCGGAUGUGGCAGCCCCGAGCCAUG  
>P1508  
UUUCAGAGCCUGAGGUGGCCACGAAGCAGGAACUGCAGGAG  
>P1509  
CUUUUAUGCUCCUCUAGGUCAUUUUUCCACCCCAAGAAAGA  
>P1510  
AAGAGAUUCAUGGCUGGGGAACCUGGCAGGGCUGAGCGGG  
>P1511  
CGAACUCGGUUGAUGCCACCAUAGUGGGGCACCAUGGCCAG  
>P1512  
CUCUAGCUCCUGAUCUCCUACUCCUCUCAGCCUUCUGCUG  
>P1513  
UGUACUGGAGACGGAUGGGCAUUUCCGAGAGAAGCUGCAGG  
>P1514  
GACAGGGGCCC<sup>U</sup>UUUGCUUCAGGGGUGAGUUUGAGGUCUGA  
>P1515  
AUCAUCUCCAGCACCACGCCAGCCGCCCGCCGUGCCGCCAG  
>P1516  
GCGCCGGGGCCCUGGGCUGCAGGAGGUUGC GGCGGCCGCGG  
>P1517  
UCGGGUUCAUGACGCUCUCGAUAUCCUGUGCAGAAACCUG  
>P1518  
GGUGUUCGGUCUUGAAUGGAAAUGUAGUCUAGGCCAGUCU  
>P1519  
GGCCUCGAGGCUGGAGAGGCAGGGAGCGGAGCUCAAGGCUG  
>P1520  
CUCGCACGGUCCGCCAGAAGAUGCGGCUGGGGGCCCGGAAG  
>P1521  
UGGAGGAGAAGAGGAAAGAGAAAGCCAAGAUCACUACCGG  
>P1522  
CCUAUCCUUUCAGGCUAUUGAGGGCACCUACAUUGACAAGA  
>P1523  
UCCCCUGGGCCCCGUGCCUCAGUAGCAACAGAAGCAGCAGA  
>P1524  
CGGGGACCCCCCGCCAGCGAGACACACAAGCUGGUGGUCG

>P1525  
CAUCAGCCC GGGUGGAGUCC ACCUGGGGCGGCGUUCCAGGG  
>P1526  
UGCUCACUUUCCCCAGAGU ACACAGCCUGCCUUUCCACUC  
>P1527  
GGCUACAGAACAGCUCCACC AGGCGGGCGAAAGAGUCGGAG  
>P1528  
GGCGGCAGCCGAGGCCGCGA ACUGCAUCAUGGAGGUGAGCG  
>P1529  
CAGGGGGGCUCUCGAGCCAC AAGCGGCCCGGGGCCUCCACC  
>P1530  
UCCCGGAUCGGCCUCAGAUU AGCAGGCCCCGGGAGUGGGGC  
>P1531  
CUCUGGGGAUGAUGAUGAUGC ACCUCGGCCAUCCCAAUUCGA  
>P1532  
GUGACCACACCGGUCCUGUC AGGCUUCACUCGGAUCUGCCC  
>P1533  
AAGUGAUUGGGAAUAUUAGC AGUGGGGGUUCUGUAGGGUCA  
>P1534  
AGACUCAUAGAAAGGGAGG AUGGAGAGUCAGGAGAGGUUG  
>P1535  
CUAAAGAAUCUUGGUACGUG AGGAAGAAACCCAGAAGAGGA  
>P1536  
GAUGAUGGAGGCCGAGAGGC AGAAGAGGGCCGCAUAGCAGG  
>P1537  
ACCUGCACUUACUCGCAGCC AUCUUUGUCUCCGCGGGCGGCG  
>P1538  
UCAACAAGGCCACGCCCUAC AACUACCCAGGUGAGUGGGGG  
>P1539  
GAGAGCGAGCUGGAGACGGA AGUGGAGUUUGUGUCAGGUGG  
>P1540  
GGGCAGCGGGCGGGCGUAGA AGGCGUCCUCGCGCACGGCCU  
>P1541  
UCUUGGCAUUCUCCUCUUC ACGCGGCCCGGGCGGCCACCC  
>P1542  
CGGAGGAGGACAAGGACCGC ACGGAAAAGCUGCUCAAGGAG  
>P1543  
AGAGGAUGAUGCCAAGAAAA AGAAGGUGCUGUCCAACAUGG  
>P1544  
AGUGGAGUCAGCACCAAGCC AGGCUCCCCGCGCCUGCCUUG  
>P1545  
UCAACAAGAAUGCUCGCGCC ACGCUCAGCAGCAUCAGACAC  
>P1546  
ACGUUGACGCAGAUCUCGCC AUUGGCGCCACGUUCGGGUG  
>P1547  
GGCUCAGCCAAUUCCACCC AGUUUCCAGGAGUCUCAUUUG  
>P1548  
CCCUCAUCUCCCGCACUGAC AGGUGGCUGGGGGCCAUGGCA

>P1549  
AUGUCCUGGUCUGCAGCCUACUGGUCGGCCUCCACCUUCA  
>P1550  
UCGGAGCAAGUCCGUGGAAGAAGCCAAAGACUGGGACGGAU  
>P1551  
GUAGCCGAAGCCAGCGGCGGAAGUAGCCGAAGCGGCUGGAG  
>P1552  
GGAGAAGAGCAGUGGCUGGAUCUGACCCGCAGCUUCAAG  
>P1553  
AUGGCCAGUCACGAGAACCCAGGUGAGCAGCCAGAGGCCUU  
>P1554  
AAGGGAGGCGCAGGUGGAGGAGGACGAUGGGAGGGAAGGAG  
>P1555  
CCCCUGGAAACCGGACCCGACCCGCGGUCCCAGCCCAGA  
>P1556  
GAAGUUGCCCCAGAUCCAGAAGAUCAUGAUGGAGUUUGAGC  
>P1557  
ACUCACCGGAGCUGGGACGGACACCCGUUCCGCUUCCGGG  
>P1558  
GUGGUCGAAUGAUCAGGUCUACUCCUGGCCGCUUCUUC  
>P1559  
GGCGAUGGGGAAGGGCCGAGCCCCGCCAGCCAGCUAAA  
>P1560  
CUGGGUGUUUCCUGGUCUGCAGUCCGCAGCUCCUGCCAUC  
>P1561  
UUCGCCUGACGGGGUUUCGGAACUCUCACAUCGGGGGA  
>P1562  
CCGGGCCGUGCCCGGGACAAGCGCGCCGAGGCCGGGAGGA  
>P1563  
CUGGCUGUUGUGUGGUUUUUGCUCUCUUUGUCUGCCUGU  
>P1564  
CUGGUGGGAAAGGACCCGGGACUUGAACAGUGUUGUGCGGC  
>P1565  
CGCACCUACCGAGCACCAGGAGAGCCAUGCCGAGCGCCGGG  
>P1566  
AGCGCCGCCUCCAUAGCGCCACGGGCGCGGGCACCUGGGCG  
>P1567  
CCGGGCGGGCCCCUGGGAGCAGCCCCAGGCGGGGACCGC  
>P1568  
CAGUCGGGAGGGAGGGAGCGAGCAGGCGAAGCCGCGGAGGA  
>P1569  
GCUCACCUCGGGCUGCGCGCAGGUGGCGAGAGGGUCGCUAG  
>P1570  
GGAGGAGGAACGAGGGGAGAAGGCGGAGAGCAGGAACGCGA  
>P1571  
GCUCUGAAGGGCUCCAGCCAACGGAGCCCGCGGCCAAACG  
>P1572  
GGGUCGGGCAGCAGCAGGACCCCCAGAGGCGGGGCCUG

>P1573  
GCCGAGCGAGCUCCGGAGGAUUUCAGUAUCUGCUACGGUA  
>P1574  
GAAGAAACAACUUGAAUAGAAAAACGCUUAGAGAAGCAAC  
>P1575  
AAGCCCCACCCACAGGCUGACAGAGGCACCGUUCACCAGA  
>P1576  
GGAAAGGUGGGAGAAAAGGGAGUCAGACCGGGGGGCACC  
>P1577  
GCAGCUCCGGCGCCGCGGCGAGACGGAGACGGACCGAGCCA  
>P1578  
AGUGAUAGAGAACGACAAGCAGAAGAGCGACACGCCCAGC  
>P1579  
GGAGCUCAGAGGCGGGGCGAGUACGGAGAAGCGGGAAGGA  
>P1580  
AUAUGGGUGUAAAAGUUGAUAAGGUCAUGAAGGUUCAACAGA  
>P1581  
CAGUGGGGAGGGAAAUGACCAGAAGAAAAGCUGCAGCUU  
>P1582  
GGCCUGAGAGGAAGGGCAGACAGGCGGGCCGAGAUAGGAG  
>P1583  
GCUUCCUCGUUUCAGGGCCACCACCGCUGUUGUACCACUG  
>P1584  
AGACAAGGAGGUACCACACUAUUCACUGCUGCGUCGCAGAG  
>P1585  
GUAACGCGACAUGAUGACAGACCCGCGUGCUCGGCUCUUA  
>P1586  
UGGAGCCAAGUGAAGACCACAGCGAGGAGGAGUGAAGAG  
>P1587  
GCCGAAUCGGCAACGGCGCUAGGGUGGAGAGAAGGCGGCAU  
>P1588  
GAGACGUUCAGACGCCGAGCACCGGGCUCUCCUGGCGGGUG  
>P1589  
CUACAGGGGCCAGUGGCUGGAGAUGUUUGUCAUGGCACUG  
>P1590  
UGAUGAGCCUCAGAGCCAGAGAGGAAGAAGAGAUGGAGG  
>P1591  
GGAGGCCGACAGAGGACCAGUAACACCGGCCCGCCGGGACC  
>P1592  
CCAGCUCAACCGGGAGGUGGACGACCUGGAGCAGUGGAUCG  
>P1593  
GGACGAGCUCUAAAGAGUCCAGCCCCAUCCCCUCCCGACC  
>P1594  
CAGAGAUGGUGGAGCUAGAAAAAAGCCCUU  
>P1595  
GGAGGAGCUGGAGGUGCUGGAGAGGAAGCCCGCCGGGC  
>P1596  
GCCCCAAAGGGCAACGGGAGAUCCUAGGCCAGACCGC

>P1597  
UUUCCUUCUGCCACGGCGGGAUCGGGCACUCACCCAGUUGC  
>P1598  
CGGGCCCGGGCAGCGAGGGGAGUGCGCAGGGGAGGGCAGCC  
>P1599  
CCCCCCCCAAGGCUCGCCUAAACUUUCCCCCUUCUCUUGU  
>P1600  
CCGCGCGCCGCGUCCCACGUACCCCGCCGCGCCGGGCAAGA  
>P1601  
GAGCGGAAGGCCGGCUGCUCACAGCCUGUCAGCGCAGCAG  
>P1602  
GCGCAGGAGCAGGUGCGAGAAAGGCGAGGAGAGGCGCAGAG  
>P1603  
GCCACGGGUAAUCGAAAGAAAGGAAUGAGAUAGGCUGUUC  
>P1604  
AGAGCCGUCGAGCCGCACAACCUACAGCCACCGCCGCCCG  
>P1605  
UUUCCCAAUCAGGGAGCCGCACUGGGUGGCCGGCACCACCA  
>P1606  
UCAAGAUCUCCACUUAGGGAAGUGGGAAUCUUUUUGCGGA  
>P1607  
ACGCGCUGCGGGGCGCCCCAGUCUAUGGAGCGGGGUAAGA  
>P1608  
AAAAGAAGCUGGAACACAGAAAGAGAGGAGGUUGUGUCUCUU  
>P1609  
AGACCCGCGCGGGCCCGCCACGCCACGCAGAAGGAGAAC  
>P1610  
ACUCAGCACUUGAAAGUACAAAUAAUCAUGGAUACGGAAGC  
>P1611  
GAGGGGACUGAUAGCUCCCAAGGCAUCCCCAGCUUGUGAG  
>P1612  
UCCAGACUCGGCUGGAGGAGACCAGGCACUGCUGCGAAAG  
>P1613  
GGGGCGGGCGGCUGGCGGUAGAGGAGGCUGUGGUCCUCAG  
>P1614  
ACAAGAUGGACCCGCUACGGAACGAGGUGCAAGGGCGGCAG  
>P1615  
GCGCUGGGCGCUGGGGGGGCAGUGCUGUUGUUGUUGGGG  
>P1616  
GCCAGAGAAUAGUCCCAAGUAAACUUUGCAGAGGACGGCCA  
>P1617  
GGCGGUUGGGGUGCUAUGGAGGAGGUGCCUUUCAGGAAA  
>P1618  
AAGCCAGUGAAGGUGGAGGAAAUGAUCGUGUGCGGAACCUG  
>P1619  
CUACUCUACUUUCUCAGACAAAUCCUGUCCCUUGUGCCG  
>P1620  
GAACCACGGCUUCGUGCACCAUAUCCGACGGAACCAGAUCG

>P1621  
AUCCUCCAGGUCCGUUUUGAAUUCGACACCCCAAGAGACG  
>P1622  
GGCGGCGGUCACACCCGAUAACUGACAGGCCCGCAGCAUCU  
>P1623  
GCGUGAGCACCAUGGUUUCACGCCUGCAGGAAGAGCUCCU  
>P1624  
AUGAGAGUUGUUGACAGGCAAAUAAGGGGUAAGUUAUCAUU  
>P1625  
AGCGAACGGGAGCAGCGGCGACUCGCCAGGGGGCUAGGGCG  
>P1626  
CACCGCUUGUCUGGAAUGUCAAUUUGAAACUAAAAAGCAG  
>P1627  
AAGAAUCGAAAGGAGAAAAAAGCCGAGAUGUAGUCUCUAA  
>P1628  
UCCUGGGCAGGGGCAUCGGGAAACACACGCUCUGAAGGAGAG  
>P1629  
UGCGAAGCCCGGGCCGAAGAGGCGCAGGAGGAAGGUGGCG  
>P1630  
CGCGCUGGGAUGCGAGCAGCAGGGCCCGUCCGCGCAGGGCC  
>P1631  
CUCCUCCUGGUCCUGGCGAGGGCACUGGCGGCGGGCGGGG  
>P1632  
UGUUCUCUCCUUCGCUGUUCACGUUCCUGCUGCCUUCUAGC  
>P1633  
AGCGCGGCCACCGCCCCGGGACCCGCGCCGCUGCCUCCGG  
>P1634  
AUGGGGGAAGUGGGCUCAGGAGGUCUGGAUCUGUGAUGAGA  
>P1635  
CCACUCGGGGGAGAAGCCGCACCAGUGCGCCGUGUGAUGGC  
>P1636  
ACGGACACUUACUGAAGGACAUUUUCCGGGGUGUCCAUGGC  
>P1637  
AAGUUUCAAAUUGACAUUCCAGACAAGCGGUGCCUGAGCCC  
>P1638  
UGGAUCUGCGGAUGAGGAGGAGGAUCCUGCGGAGGAGGAUU  
>P1639  
CUCCGCCAUUCUGGGACCAGCCCCGUACCCCUACCGC  
>P1640  
CAUCCUGGCCGACUUGCAAGAACUCCAGGGAGACAGCGGAG  
>P1641  
CUCCCCUGCCGCCACCCCGAGAUCAGAGUCAACCACGAGC  
>P1642  
CAGACAAGAAGAAAUCCAGGAAAGCGGCACUAUGAGGAUGAA  
>P1643  
AGGAAGAACACAAAAGCAA AAAUUGGACAGUGAUGAAGAU  
>P1644  
GACCUGGAAGCCCCGGCGGAAAGGCCGUACCCGGCAGGCU

>P1645  
UCGGGGUGGGGAGACCAAACAGAGAGACAUUUCUGGCUCU  
>P1646  
CGGACCCACGUGGAAGCGGCACUCAAGAUGGUAGGAGAAUG  
>P1647  
GGGCCGAUGCCUUAACCUUCCAGCGCGCGCCGCAGCCGCUCC  
>P1648  
UGUUCUCCACGCUGGUUCGCAGGUGAGUGUCCCUGUUUAGU  
>P1649  
GGGUGUCCCAAACCAGGGCCACGGAAGGGCAGCGGAAGGA  
>P1650  
GCACGGCCGGGCCACCAGGA AACACGGCCACGGGAUCCCA  
>P1651  
CCGGCUCGCGUGCCGCCGCGAGGUCCAUAUUUGCUUAGUGC  
>P1652  
UUUGUAGGAUUAUGCUAAAAGAGAGUAUGGAAUAUCUCAA  
>P1653  
UUGCUGAGUGUCAGCUAGACAGCAGCGACUAGGGCUCGGGC  
>P1654  
CUACCCUCCCCGAGGAAAAGAGGCCGGGGCCGCGCUGGGGC  
>P1655  
CGGCACCAUGGGCAAGGGGUAGAGGGGCAAGUUGGCCACCG  
>P1656  
UUCUGCCUGGGAGGAGGAGGAGGAGGAGGAAGAGGAGGAGG  
>P1657  
GCCUCUGUGGUGACGCGAAGACAGAGGCAACAGCAGCAGCG  
>P1658  
UACUCCUUGCUCUGCUGCGAUCUCUGUCAUGGGUUCUUGA  
>P1659  
GUUGCUGGUGGGCGGGAGGGAGACAGCAGCUCUCCUGAGC  
>P1660  
UGGCCGCUACCUGCAGCAAGAUAGGGCCGCCAUCGCCGGGC  
>P1661  
GCCGGAGCAGAAGUCCUGGUAGUUACAAGCAAAGGGAGACA  
>P1662  
CCUCAGCGUCCUCCACCGCAAACCCGGAGGCUCUCGGCAGU  
>P1663  
CCACCAUCACCUCCUCCAUAACUACCUCUGCUGCCACCACC  
>P1664  
AACUGGAGUGGCAAGUGGCGAGUCGCAGGAGGAAGGCCUGG  
>P1665  
CACCUUCCCUUCCCCCUCGAUGGGAGCGGGGGCGUCCCGG  
>P1666  
UGGCAGACCCAGACCGAGCAGAGGCGACCCAGCGCGCUCG  
>P1667  
UACCAAACCCCGGCUGCACC AAUCGUGUAUUCACCAAAGC  
>P1668  
GCCGCUGUCGCCGACUUCGACGGCAUCCCGAGACUACCCU



>P1669  
CUAGUGAAUAUGAAAAGGAA AACUGAAUGAACGGCUUGCA  
>P1670  
CUCCUAGGCCGCGGCGGGCA AGCACAAAUGCGCUCGCCGU  
>P1671  
CUGUGGAAGGGAUGGGGCAC ACGGUGCAGGCUUUAGCUGGG  
>P1672  
GAUGUGGAAGACACUACAGG AAGUGGAGCUACAGAUAGUAA  
>P1673  
CCCACGUAACACACCGCGUC AACUACACCUCGCCGCGUC  
>P1674  
GGAUGCCCAGCUCGCCGUG AGGGUCCUGGAAGAGGCGUUG  
>P1675  
UAUCGAGGUGGUAGAACUUG AUCCCGGUCCGCCGACCCAG  
>P1676  
UGGUGGGGCGCUGGGGUUGG ACAUGGCUGCUCACGGGCUGA  
>P1677  
UCAGCCUCUCACCGCCGUG ACUCUCUGGCCCUCCGUCUCG  
>P1678  
UGGGCCUGGGUCUGGGUCUG AGCCUAGGCAUGAGUGAGGCC  
>P1679  
GGCAAUACUUCAGACUCAC AAGA UCCAGAGUCCCCACAG  
>P1680  
CGUCGCGAGCAGCAGCCGUC AGUCACUCCAGGUCUGGGGG  
>P1681  
CGCCGCCUGCCCCGCCUCU ACUAGCUUUGCAGGUCCCCCG  
>P1682  
UGCCCAUCACGUAGCAGCGG AACUUGGCGUGCUUGCCCUCG  
>P1683  
UCCCGUCCUUCUCCAGUAC AGUGUGGGCUCGGGGAGGCC  
>P1684  
CCCUGGGCAGACCCUGGCAG AAGGGGCACGGGGCAGGGUGU  
>P1685  
GCCCCAGGAGUCACCACAG AAAAUGUCAGAGGAGGUCAGG  
>P1686  
UGAGGAUGAAGAUGAAAUUG AACAGCAGCGAUGAAAGCAG  
>P1687  
GAUGAGUCCAGAAGAAGCCA AGCGACGGCGAUGGCGGCCGC  
>P1688  
GAGCCUCGCAGACGGUGCCC AGGAGCCGAGGAUGGAGCCGC  
>P1689  
UCGCUAGCUCCUACCUGUCC ACGCCACCUCUGGUCCUCUU  
>P1690  
CUCUCCUGGGCGUCAUCCC AGGUAAUGAGGCUCCCCAAGC  
>P1691  
UCAGGUGGGUCCUGGAGGAG AGCUUGAGGCCUGGGGCGCCC  
>P1692  
AGUACGCAGCGCGGACCC ACGCCACGGCCAGGAGCCCAG

>P1693  
CUGUCCGCGGAGACGGAGCCACUCGCCGCUAAGUGAACGCU  
>P1694  
GCACAGGGCAUAGUUUAGAGAAAGAAUUCACCAACCAGGAA  
>P1695  
CAGAGGCAACAGGGAGCGGGACAGAGACUCCGAGCGCAAGA  
>P1696  
UGUCAGAGCAGGAAGGACAGAGACCUCGGCUGCCAGCUGC  
>P1697  
GGAGGACAAUGAUGAGGAUGCAAUGAUGAGGAUGACGAUG  
>P1698  
UUCGCAAGGUGCGCGACAGCACUGGAGCACGUGUCAUCUUC  
>P1699  
CCGAGAACAGGCGCCGACCGACCGCGCCGCGGACCCGCCCA  
>P1700  
GCUGGGCACCUGGCUGUCGGACCCACCUGGAGCCGGGACCU  
>P1701  
ACUCCAUCCAGGAGAUCUCCAGUCCUGACCCAAAAAUGGCA  
>P1702  
GCGGCCGCCGCGGGAGGAGGAAAGCGGCGGCGGUGGAG  
>P1703  
CCCCUCAGACUCCUCACCGAAGCUGCCGUCACUCCCGCAGU  
>P1704  
CUGCCCAGCGUCCUCCUGCACGCAGCCCAUCGUCGCCGC  
>P1705  
UUCGGCGUCUGGAGGAAAGAAGGGGGCGGGGUAGUGCAGU  
>P1706  
AUUCCUCCCGGGACAGAAACAAGCCUUUAAGUUUAUGCUA  
>P1707  
CAUGGCGGCGGGACGCUGAGCGGGCGGGCGGCGACGG  
>P1708  
CCCAGCCGGCCGACUCGAGAAGAAGCGGGCCCGUCCUCC  
>P1709  
CGGAGACGUUGCCACCUGCAGCUGCAGCACUCCCGCUCC  
>P1710  
AGGCUGGGCCCCUCUACCUAGGAUGACAGCUUCCUCCUCG  
>P1711  
UCAUCUCCUCCUCUUCUUCUACUAUCAACAUCACCCUC  
>P1712  
UGCGGCCACAGCAUCCCUACAACAGCUGCAGAGAGAAGG  
>P1713  
GGGGAAGUAAGUCUGCGGCGAGCGGCGCUCCGGUCUCGGCC  
>P1714  
CCGGGGCAGGGCAGCCUGGAGGCAACCGCUACCCACCUCA  
>P1715  
UCUGAGGCUCCUGAAGCCGAACCAGCUAGACUUUCCUCCU  
>P1716  
GGACGCCGUGGAGCACGGCGACCGGCUGAGCGUCAUGGAGG

>P1717  
UGUGUUCUCCGGGCCUCUGCAGGUUGCAACUGUGGUGGAGC  
>P1718  
AGUCUCUCCACAAGUCCGAAGGCUCAUAGUACUUCAGCAU  
>P1719  
UUUUCUUGGACCUGUUCUUUACCGUCUCUGGAAGCAUCAAG  
>P1720  
GCCUCUGGGCUCUGGGCCACAUUCUGUAUUUCUGCCCUGGAC  
>P1721  
GCAGCACCGAGAGGCCAGCACACCACCUUCGAGCUCCUAGAC  
>P1722  
CUGUGACGCUGGCCCGGGUGACGCGCUGCACCACGGCCUUC  
>P1723  
UGCGGCUGAGCCAGCGGAAGACGCCGGGACUCCCAUAGCG  
>P1724  
GCCCGUCGCCUUGGAGCAUGAGCGCUGCGCCGCCGCGGGCU  
>P1725  
CUGGAGCAGGGGCACCCAGGAGCAGGCCUCGGAGCAGCAGG  
>P1726  
CCGGUCGGAGGCAGAACGGUAGCCCCUCGGCGGCCGGCCGG  
>P1727  
GAGCACCGCAACCGCCUCAGAGCCAGGCCUAGCGGCGCGA  
>P1728  
GGAGGGAGAAGAGGGUGAGGAGGAAGGGGAUGAUAAAGGAUG  
>P1729  
GGGCUGGGCUCCCCGGCGGCACCCAGAUUGCGCGGAGCGGG  
>P1730  
UCCAAGCGGCUCAGCAGGGCAUCGAUAUUGGACUUGAUCUG  
>P1731  
AGGUGGCAGGGCGAGAGGGAAGUAGUAGAAGGGGGCUAUG  
>P1732  
GUGACGAUGACCGUGAGCCC AUCCUGGCGGCAGGAGCACUC  
>P1733  
UAGGUGUUGGUGAGCUUGGCAAAGCAGCCGAUCUCACAGUU  
>P1734  
CUCAUCCCGGGCCCGGCUCCAGUCCACUGUCAGUUUUUCCA  
>P1735  
GAGAAAGAGGAGACAGAGGAAGCACCGAGGGUGACUACGUU  
>P1736  
UCAGCACCCACCCACCCACAUGAUCACUGACAUGGGCAG  
>P1737  
CAAUGAGAUGGUCACAGGAAUGGACAGCUGAACCAAGGUC  
>P1738  
AGCCCGAAUAUCGGGUUCCAAGGACGGCUAGGCCCGAGAGA  
>P1739  
GUGGAUGCUUUGUCAUUUUCAGUCAUCAACGGGGCUGCCUU  
>P1740  
UGUGGGCUCCUCGCUGCCAGAGGCCUCACCGCCUGCCCCUG

>P1741  
CCCGAGAUGGGGAGCGAGGGAGGGGCUGCGGAGGAGCGCGA  
>P1742  
AAACUCCCCAAAUGACACCCAGGACCACAGCAAUGAUCUGU  
>P1743  
GAGUUACUGAUUUUAUUCUUGAGAUUCCUCUACUCUCGUUUAU  
>P1744  
GCGGUAGAAGAGGAGGCCUGAGGAGCUGGGCGGGCAGGGAG  
>P1745  
UGUUGACUUUUCUCUUCAGGAUCCCUGCUGCCUUGGUGAUC  
>P1746  
GGAUGAUGAAGAGGAGGAGCAGAAGAUGCGUCGAAACAAA  
>P1747  
CAGCGGGCAGCAGAACCCUACACGACCAACGUGCUCAGC  
>P1748  
CUUGCUCUCCACAUUCUGGAUGAUGGCGCUCUUGAUGAAG  
>P1749  
AAUGUAGGGCCUGCAUGGAGAGGGUUCUGCCCUGCCUGAG  
>P1750  
GAAUGCAACUGCAGAAGCAACAUGUGACCUUUUAGAGAUG  
>P1751  
GCAGGUACAUGGUGUCGGGCACAGCUGGGUACGCACCUGAA  
>P1752  
AUUCCCAGACUCUGUGGAGGAGCUCCGCGCCGCGCAAUG  
>P1753  
GGCGACUCCGCCUACGAAGACAGCAGCAGCGGAACAGAC  
>P1754  
CUAGUGUCCUGGGCGUCCGAGGCGAGGCCCCCGACCA  
>P1755  
CUAGCGCUGCUGGCAGGCGACAUGCAGAGUCCCAGGCUG  
>P1756  
AGGCAGAACAGUACUGGCGAGAGUAGCAGUUGAGGGGUGAG  
>P1757  
GCAGCGGCGGGCCUGAGGCGAGGAGCGGCCGGGAGCCCGC  
>P1758  
CCUCGCCUAUGGUUCCGAUUAGCCGAGGUCCGCAAGCAUG  
>P1759  
CGGGCCCGCUUGGCUCUGCGAUUCCUCUUCGCUAGCCGUUC  
>P1760  
GAAGCUCCGCAGGAUGGGGAGAAGAUGGCGGAAGAGGAGU  
>P1761  
GCUGUGGUGUACGAAAUGACAUUCAGCUAAUACUGGACUCG  
>P1762  
UGCUCGCGCCCCUGCACCCACCGCCCCGCGCCGCGCC  
>P1763  
AAGAGGAGGAGGAGGAGGACAGCGGUUCAGUAGCUAACUG  
>P1764  
UCUUCUUUUUCUUUCAGGCAUCAUGGACCGAUCUAAAGAA

>P1765  
GCGAUGGGUUGCGACGGGGGACAAUCCCCAAGAGGCAUGA  
>P1766  
AGGAGGGGACAUGAGGUGAGAGGUAUCCUGGCCGAGGGCGG  
>P1767  
GGACCCCGAGCAGCAGCUGGACUGAACCGGGAGUCGGUGC  
>P1768  
GGGCUCCGGCCGGCGCCCGGAGCUGGGGCCCCGCAUGCAGG  
>P1769  
UGCUCUUCGCCAAGGCGUAGAGACCCUCCCCAAAUAACUA  
>P1770  
GUCAGCGUGGUGGUGGAAACAGCUGAAGUUUUAGGAGACAG  
>P1771  
UCCUGCAUGUUAUGGGUUUAUGGAGAGUAAGUGUCAAU  
>P1772  
UGACUAUGUGCCGAGCGAUCAGGUGUGCAAACCCCUCCCC  
>P1773  
CUCGGCCGCGCUCCCGUAGUAGUCCUCGUCCAUGAUGGCGC  
>P1774  
GCCAGUCCAGCUCUUGGGCAGAUCCGCUGGGGACAGGUAC  
>P1775  
CGUCUUGGCGAUUCGGCCCGACGAGCUCCGCUUUCGUACA  
>P1776  
GGCCCGGGCCUGGAGCCAGGAGGGGCCGCACCGGCAGCACC  
>P1777  
CUUGCUCUUCAGCGACUGCGACCCCUGACGGGCGCCUGCC  
>P1778  
CGCCCAGCCCAUCAUCCUCAGGGACUGCCAGGUGAUCCCG  
>P1779  
GCUGGAGGCCUGUGUCGCCAGGACAACAGCCUGCCCCGGC  
>P1780  
AGUUGGGGCUGGGGAAGGUGAGCGGCUUGUCCCCCAGCUGA  
>P1781  
CGCGGAGGACGAGGACUGCGAGGACGGCGAGGCCGCCGGCG  
>P1782  
CCAGGGUCUGACUGGACGAGAUGGACCCCUUGACCCAAGG  
>P1783  
CGCGGCAGGAGCAGGGCUGGACGGGCCUGAAGGAGACCAGG  
>P1784  
GUGACCCACCUGCCCGAGCCAGCCUUGCGGCCUCUGCCCGC  
>P1785  
ACGCCUGCUUGGACUCAGCCAGCCUCUCCUCGUCGGUGGAG  
>P1786  
CUCCUCGUCCAUGCUGAGAGAGGGAGGCGCUGGACCAGGGC  
>P1787  
GAAGGCAGACACCCACAAGAAGAUGACUGAGUUCUAGAGAC  
>P1788  
CCACCACCGCAGCCUCACCCACCUUGCUGCGCCCCGCCGAA

>P1789  
UGAUGGUGAGGAGGACUUCUACUACACAGAGCUGGAUGUUG  
>P1790  
CUUUGCAGGUGGAAGAGGAAUUGUCACUCUGCGCCAGGUC  
>P1791  
UGUCCACCGCCGUGGUGAUGAUUCUCACUCGCGGAAAUGCA  
>P1792  
UGUCAUCAAGCAGUACAACAAGUUUGUCAAGCCUCCUUCG  
>P1793  
CCUCAAUCCCAAUCCCAAUCACGGCACGCAUGACGGCCUGG  
>P1794  
CUGCCCUGAUGUUGUCUUGCACCCACUCCAGCUUCACAGAC  
>P1795  
AGGUGAGGAAGCGCUGUGAGAGUGGCAGAGCCUCGGCAUGGG  
>P1796  
GCAGGUGCAGCGUGAUAGGC AUGGCCUUCAGCUCCCGCAGC  
>P1797  
UGUGAAGACUUGGAAGAGGAACGGAGGAAGAAGAAGAGAA  
>P1798  
CGGUGCCGCCGGCGGGUGAGGCCCCGCGGUGUGUCCCG  
>P1799  
GCAGGCGCCUUCGCGGACCGAGCCUGACGGAGCCGGAGGCU  
>P1800  
GAUGAGGAUGGUGAUGAGGUAGAGGAAGAGGCUGAGGAACC  
>P1801  
GGCCGCGGGGAUGUCCGAAAGGCCCGGCGGGUGAACGUGC  
>P1802  
UUGCUAACAUCUGGGAGUCC AUGGAACUGGUUGCUAACAUC  
>P1803  
UCCACGAAGAGGAAAAACUGAAAAGGGAGGAGAGUGUCAA  
>P1804  
UCCUCCGCCUGCCGCACAGUAGGGACAACUCUCCAUUUAGA  
>P1805  
CCCUGGACACCUCACUCUGCACCCUGGACACCUCACUCAC  
>P1806  
ACAGUUACUCACCGGUCUUCAGUCUCGAGGCAGACGCCGGG  
>P1807  
CGUCCGCCGCCACCUCCACCACCGCCACCGCCACCGCCACG  
>P1808  
UCAGAUGGGGGUAGGGUGGAGGCACUGGCUGCGUGGCUUC  
>P1809  
AGCCCGAGCGAGCGGCGGAGACCGUGCCCCCGCCUCGGCCC  
>P1810  
GCCUGGCUGCCACUACCGUACAGAGGCCGUGUCGCGCUGG  
>P1811  
GCAGCUCCCGCCUGAGAUCAGCUGGCUCAGCGCCUGGCGG  
>P1812  
GGACCGCGCUCAAGAGGCUGAUGGCCGAGUACAAACGUGAG

>P1813  
AAAGAUGUUGGUGUUGAUGAACGCCAGUCCUAAUGUCCCC  
>P1814  
UGAGGGUCCGCGAGGCCGGGAGGUCCGGGGGUCGGGAGGUC  
>P1815  
AGGACCGUCAGCGCCGCGGGAUGCUGCCUCCUCCGCCGCGG  
>P1816  
CAGGCCCAGGUUCCACGGGCACCUGCUUCUCCACCGCUGGG  
>P1817  
CUCUGGUCUGUCUCUACUGCAUUCUAGAAACAGGGCAAUC  
>P1818  
GCGUGGUUGCAGGCAGAAUUAGAGCAGUCACACCCACGGUU  
>P1819  
UGCCACCUCUCCACCAACAACGGAAGCCACCACAUCUUC  
>P1820  
AGCCGAAGUGGAAUGUGGGGACGUCUGCGACACCGGGGACA  
>P1821  
AUGAAAGAGGCGGCGGGCAGUUGCUUCCGACAGGGUCCC  
>P1822  
GCAUGGUCUUCUCCUUCUCCAUUGCUCUAGGGUAGGCCUGC  
>P1823  
GCGGAUCCAUGCCCUUCUGAAGGGAAAAGUGAAGAGGAGC  
>P1824  
GCGCUACGCGGGCGCCUUGGAGGAGGUGGCGGACGGUGCCC  
>P1825  
GGGCGCAGGGCUAGCGAGAUACUUCGCAGCACGGAGGCCGU  
>P1826  
GGUGGAGAGCGUCAACCUUCAGUGGCCACCUACUCCAAU  
>P1827  
CUCAGGCAAUGCAACGAAGAACCCCGCCGACCGCUCUCCC  
>P1828  
AUGGGUCAGAGCCUUCUGAGAGCGCACACGGUUAGAAGAG  
>P1829  
CGGACGAGGAUGAGGACUUCAGCAGCAGGACCGGGAACUG  
>P1830  
GAAGUGGUGUGCCACGUGCCACUUCUACCGCCCGCCGCGCU  
>P1831  
CACCAUCCUACGCGGGCCCCAAGCUGUCGCCUUCAUCCAC  
>P1832  
UCAGCCCGGCCCCAGGAGAGAGACCCGUGGAGCCCUAUGUC  
>P1833  
CCACAGCCCCAGCAGCCUCCAGUUGCUCAGAACCAACCAUC  
>P1834  
GUCGAUGCCCCUCCCCCCCAGCCGUCCCCGCAGCCCGGCC  
>P1835  
GGAUGGCUGGACCGGGCAGCACGGGGGGGCAGAUCGGGGCU  
>P1836  
CAGCGCCCGGCUCGCGCCGCACGCGCCCGCCCCGUCCGCCU

>P1837  
GGCGGCGCAGUCCCUGCGGGAGGGGCGACAAGAGCUGAGCG  
>P1838  
UGCAGGGCCAAGCCACAGGAAGGGCUGAGCUGGAGGUGGGC  
>P1839  
AGUCUUGCAGGAGCGUGUCCAGGAAGCCUGGGGUCUCCUCA  
>P1840  
GGACCCGGUGGGCUUCGCGGAGGCGUGGAAGGCGCAGUUC  
>P1841  
UUCUUGGCAAAGAUGUAAACAGCGCGGCAGGGCUGGGACAG  
>P1842  
GCUGGCCAUCGAGGGUGCCCAGGCCUUCUACAACGGCAGCC  
>P1843  
UGAGCUGUUUCUCCCCAGGACGGGGCUCCAAGUGGUCCCC  
>P1844  
AAACUCACCUCUGAACAGAACAUGGCAAACACACGGCU  
>P1845  
GCGAGAGGUGGAGGCCGCGGACAUUUUGGUGCCAAGCCGAA  
>P1846  
AAAAACGGAAGCCCAAAGUGAUCCGAAGCGAUGGAGCCCA  
>P1847  
CCAUGGGAGGUGGGGAUGCACAGGGGGCAUUGGGGCUGGA  
>P1848  
GAUUGGCCCCAGCAAGCCCAUGAAAUCCUCAACAGCCAC  
>P1849  
GGCAUCCGCCAGCACGUAGGAGCUGGCCACGCCAUAGCUCA  
>P1850  
UGGUGCCCGCGGGCGCAGAAAGGCUCAGGGCGCAGGUCCGC  
>P1851  
CAGCCCUGGAAGAGCAGAGGAUGGAGGGGAAGGUAGGGGGA  
>P1852  
GGAGAUGUCAGCGCAGGAGGAGACCGCAGGAAGGAGCUGG  
>P1853  
UGCCCACCUCACGGCUGUGACACGGCCCGUGUACCACUCC  
>P1854  
ACAUCUAGGCUGCUCAGCCACCUGAGGCACCCCGAAAGCC  
>P1855  
GAGGCCACAGGGUACUCGCCACGAUGAGCAGCACCUUAGCU  
>P1856  
GGGAGGGGAGCGGCGGCCGAGGCAAAGGGCCGCGAGCGG  
>P1857  
GGUAUGCCUGGGCUGAAGACAAGGAGCACUGCGAGGAGUAC  
>P1858  
CCAGCAACAUUGUCAAUAGGCAGGCAGCGGCAGGAGGGGCGA  
>P1859  
GAUGGACAGACAGACACCACAGCCUCCCUUCCAGACCCC  
>P1860  
CGACAAGCUGGAGAAGACCAAGACGCGGCUGCAGCAGGAGC



>P1861  
CGAUAAGUAUCUCUAUGUGGAUAAAAACUUCAUCAACAAUC  
>P1862  
GGGUCUGCAGGGCUCUGGAAGUGAGGGGUGGCCACUGACC  
>P1863  
GUCGGAGGCGGGGAGGCCGGAGCUGCGGGCGUAGGGACCUG  
>P1864  
AACCAGUGAUGUGGAGCUGGAGUUUGUCCUCCACCGAGAC  
>P1865  
CAGCCCCUCAGCACAGCCCUACCAGAGGGUUCAAGGAAGG  
>P1866  
UCUUGAUGAAGGCGGGGUCGAGCUGAGCGCGGAACUCGGCG  
>P1867  
GGGCCACAGGGAGGGAGGGGAGAUGGAGGCCCGUGGAGCG  
>P1868  
AGGACGCGCUGUGGGAGCGAAUCGAGGGCGUCCGGCAUCGG  
>P1869  
GCGAGCCCCGGGGCGCGGGACGAGGGCGGACUCGUCGUCU  
>P1870  
GCCGCAUGACCGAGACCGGGAUGGUUCCUCCCCUCUGAGC  
>P1871  
UCCCCGGCUCGGGUGUCGGGAGAGCUCGCCGAGCCGGCUUU  
>P1872  
AGAAGCUGGCUGCCACGCCCAAGAAAGCCAAAAACCCAAG  
>P1873  
CGCGGCCGCCGCGCACAGUCAGCUCUGGCCAGCUCGUGG  
>P1874  
GCCGCGCGGAGCCGUUGCCAUGGCAGCCGCCCGGGGAC  
>P1875  
CCCUUGUCCAAGGGCCCAGCAGCCCCUCGUGUAUCCUGGA  
>P1876  
CCGAGUUUCCGAGCCUCAGAAUCCAGGAGAUACGCACAGC  
>P1877  
CCACUGCCAACCGGCUCCGCAGUGCCGCCGAGCCCGUGGCU  
>P1878  
GCCGGGGCGGAUGCCGGAGGAUUCGCGGAGCCGCCCGGCGC  
>P1879  
UGGUUCAAAAGAAAUGGAAGAAAAGGAGCGAUGUGACCGAU  
>P1880  
CUCGCGCCAGCUGGGGGCGGAUGGGCUCACGGUCUCGGGGA  
>P1881  
GAUAUGCUUGUCCUGUCCCACUCUUUCUGAAGCGCUGUG  
>P1882  
CAAGGACGGCAAGCUGAUCAAGAACAAUGCCUCCACUGACU  
>P1883  
GGUGCGUACGGAGCGGGCAAAGCCGGGGCGCCUUCGACCC  
>P1884  
CCGGGGAGAGGUACCCGGCCAGAGGCGAGUCCUGCGGAGUG

>P1885  
GGCCAUCAGGGCCCAGGCGGAGAUCAGCAGAGCGCCUCAG  
>P1886  
CGCAGGGCGGCCUCUCCCCACCCUCAGCCCGGGCCCGGG  
>P1887  
AGCCAACAUGUCAGGGUGGGAGUCAUAUUACAAAACCGAGG  
>P1888  
AGGGAAAGUUACCAAGAGAAACACGGUGAGAAGCUGAAUG  
>P1889  
CGAUGCCCACCUCACCAAGAAGCUACUGGACCUCGUUCAGC  
>P1890  
ACAGUGGGAGAAACAAGAUCAGAUGAAAGGUGAUGCGGAUG  
>P1891  
CCCGCCCUGGGCUCCCCAAAACCGCAGAGCCCCUCCCACC  
>P1892  
GGCUAGUAUUGGCACCCGUCAGGUCCGGGGCUCUCCGGAGC  
>P1893  
CCUCGUUCAUGUCCCGACUGAAAUGGGCUUCACGAAGGUG  
>P1894  
GCCUGUGCUCCCCCGGACUGAGGCAGCCAGCUUGCGGGUGC  
>P1895  
UCGGCGGAGCAAGAUGGCGGACAUCUCCUGGACGAACUCA  
>P1896  
AAUCUUGUCCCUUCUCCCCAUCCCUUAGCACCGGCCUCU  
>P1897  
GGCCGUGUUCGUGUUGGCAAAGAAGGUCGGCUGCUGAGCCA  
>P1898  
AGGCCGGCGUACCAGCGGAGACCCUCGCCGUGGACAAAGCG  
>P1899  
CGCCACCCCGCGGCCCGCAGGAUGAAGAAGGACGAGUCG  
>P1900  
GCAGAGGUGCCAUGAGCCUACAACUGUGGUUGCAGAUGGA  
>P1901  
UGGACCACCUCCCGGUGAAGAUCCUGCAGCCAGGUACGCGC  
>P1902  
CGAGGUGAGGUGAGGGGUGGAGCGGGGAAGCACGGGUGGG  
>P1903  
GCCGACCGACGAGGUGGACGAGGGCAAGUCCAAGAGAGGCA  
>P1904  
AGGGCCGGGGCCGGCCAUGAGCGCGCCGUCCUCGAGUCCC  
>P1905  
CCGGGCACUUAGACUGCUGCAGCCGUCUUUGGCCAGGCAG  
>P1906  
CUAGAGGGAGUGGAGCGGUGAGCACGUCAGGGGUGGGGGGC  
>P1907  
CUUCGGGGGUCUCUCCGCAGUGUUCUCUGAGUCUGAGCU  
>P1908  
CCAGCAUGAUGGCGGCCGGGAGCGAGAACGGACGGGAGGAC

>P1909  
GCUCCGCCUUUCUGCCCCCACCACCCACCCUACGGGUACGG  
>P1910  
CCGAGCGCCGGCCAUGGCCAGCCCCGCGUCCCCUCAGUGU  
>P1911  
GGGGCACAGCCCGGGGCGGGAGGCGGAGCUUGGCGGCCGAG  
>P1912  
UGGUUUGGGUGGGCAUUUGAUGCGGGAGGUGGGUGGUGUG  
>P1913  
CACGGGCAAAGGGGCUUGAGAGGCCCGGAGGCGAAGCCGA  
>P1914  
GCUGGUGAUUAUCUCAUUGUACUCCCGGUUAGCCCAGUCCU  
>P1915  
GAUCCGCGACUGAGCCUGUGAGGUCUGGGGGACUGGACGGC  
>P1916  
GGUGUCCUCGAGGCCGACCCAGCGCCCCAGGCGGCGGCUG  
>P1917  
GAAGCCCAAGAUCGUCAAAAAGAGAACCAAGAAGUUCAUCC  
>P1918  
GCUCGAGGCGUGAGGGCUGCAGGCACAGCAAGAUCCCGGGG  
>P1919  
GCUUCCGCGUCUUGUCCGUCAGCCUGUGCAUUGUGAUUGAG  
>P1920  
CAGCCAGUCUCCUUUAUGUGAGGGUUGGUUCAUCCUUUG  
>P1921  
CCGUUGCCGCAUGCCCAUGAGGGCCGCUUCCCAUCCGC  
>P1922  
AGGACUCGGGAGCGCCGCGGAGGAGCGGCAAAGUUUACUU  
>P1923  
CCGGCUGCGUGAGUGCUUAGAGCUUUUCGGUGGAAGAUGCC  
>P1924  
UCUCUCCAGCGAGAGAGAGACACGAGUGGCCAGGCCAGC  
>P1925  
AGGGCCUGUGAGCUGGAGGCACUCGCCAUGGCCAAGUCGGG  
>P1926  
CUUGCUCUACGUGGUCAGGAAGAGCAGGGAGACCAAGCAG  
>P1927  
CGCUGUUCUCCGGGAGCCCACACCGUUCGCGCGGCCA  
>P1928  
AGUUAGGAGGAGAGUAGGUGAUGAUCAGACACCGGAGUU  
>P1929  
UCGUGCCAGACGUGGCCUCUUCGCCAACCUCUUAACCCC  
>P1930  
UAGGCCGGAGGGACUCGGAAAUUGAUGGUCCGGCAGGUGGU  
>P1931  
CCCGUUCUUGAAGCGGGCCAGAAACGCCGGCUCGGCUGGC  
>P1932  
CUCACCCUCGAUCCCGAAAACAUGCAGCCGGUGCCUCCA

>P1933  
GGAGCCAUCGCCGAAGCCCGAGGCCGGGUCCCGGGUUGGGG  
>P1934  
CUAGGAAGACCUCCGUGUGGAUGGCCGUGGCUGUGAGGACU  
>P1935  
AUCUAGAAAGACUUCGGCGGAUGCACAUGC GAAGUCAAGGU  
>P1936  
UCUCCGUGUCUGAGUUGCCUAGUCGCGGCUACGGCGUCAUG  
>P1937  
GCAUGC GGGGCACGGCCUCC AUGGCCGUCGGCACCCGCCGG  
>P1938  
GCCGCCGCCGCCGCCGCAGCUUGGGAGGUGCUGCCACC  
>P1939  
GUCAAGAAAGUACAAGAAGCAGCACGAGCCUCUGGGAAAGU  
>P1940  
CGGGCUGCGACGAUGGCCGCAGCGCGGGCGGGCGGGGCC  
>P1941  
GGACCUCCGCGCCAGGCAGCAGAGGGCGGAGCGAGCCCCCG  
>P1942  
AGCAGGUGAAGCAGAUGAUGAUAGUGACGACAGACAGCACA  
>P1943  
CGCGGCGCGGGACCGGCCAGUCAUGGCUGGGCGGGCGGA  
>P1944  
CGAGGCGAGCGUGGGGAGCCAGGCAUCCGGGUACGUAUGUC  
>P1945  
GCCCCCAGGGAGAGAAGGAUCCAGGACCCUGGGGCCA  
>P1946  
GCCAGGGCCGCGAGGCGAGAGGUGAGGUGGGUUGGCCUG  
>P1947  
UCUCCAUCUUUCCACUGGCACCAUCUCGACCUGGGGCUC  
>P1948  
GGCAUCAAGGAGACCGGGAGAGCCUGGACCGAGGGGUCA  
>P1949  
AAAGCCAGGCGAGGAUGGCAACCUGGCCUGAAUGGAAAA  
>P1950  
GGCUGGAUGGCCGGAGCGGACUGGAUGGGAAACCAGGAGC  
>P1951  
UCGGGGGCCUGUGGGUGAAAAGGGAGACCAGGGAGAUCUG  
>P1952  
UGGACUGGAGCCAGAUACUGAGUAUACGGUGCAUGUGAGGG  
>P1953  
CAAUGGAUGAGGAGCCAUCCAGUAAGAACACAAUGUCAGCG  
>P1954  
UGCCCUGGAGAAGGAGGUGGAGAGCAUGGGGGCCCAUCUUA  
>P1955  
GAACGCGUACAGCGCGCGGUACAUGAGGCCGGGCAGGGCAG  
>P1956  
AGAGAAACAAUAGGACGGAAACGCCGAGGAACCCGGCUGAG

>P1957  
CUUCGGCCGCGCCGGCAUGAGCCACAUCCAGAUCCCGCCG  
>P1958  
CUCCCACGUAAUAGUCCUCU AUGUCCCCAGGGUCGUCUUCU  
>P1959  
GGCCACCACCUCUCCCCUC AAGGCAUGCUGAGCAUGGGCA  
>P1960  
UACAAGGUGUCAGAGUAUGC ACGGCGCUUUGGUGUUCGGU  
>P1961  
CUUCUAGCCGAGCUUUUGCC ACCUGAAAGAAGCCCCAGGUG  
>P1962  
UUGACACGGAACCCCAAAGC AAGGAGGAGGGCUCGGGCCCCG  
>P1963  
CAAAGACCAAAGAUGGAGUG AGAGAGGUUUUUGAAAUGGCU  
>P1964  
GUCUGUCAGGCGGGUUGGUG AAGGGCGCGGGGCCGGGCACG  
>P1965  
CCAGCGCCGCGGACACCGGA ACUUCUCCGCGCGGGGCCAC  
>P1966  
UGACUAUGAGGAGGAAGAAG AGGAGGAACAGACCCCUCCCC  
>P1967  
ACUUCACGUGCGCCACCGAC ACCAAGAACGUGCAGUUCGUG  
>P1968  
CACCUUCUCCAGGUGCCCGG AGCAGUGCCCAAGCUGACUCG  
>P1969  
AUGCUUGUGCUGACCUCAUC AAUGAUCAGUGGCCCCGCAGC  
>P1970  
GGCCGCGGAGGCGAAGGGCC ACAGGCCCCGAGCUUUGGACC  
>P1971  
GGUGCCUCGUUCUGUACCCG AGUCAAGCCUGGUCAGCUCCC  
>P1972  
UCCCAUGCAUACCUGCCUGA AAGGCUGCCCCACCCACCCAC  
>P1973  
CGUGGACUCGCGCAGACGGG AAGCAGGCGCGUGCUGGCGGU  
>P1974  
GAUACGCAGGUACUGGCGGA AGAGCGUCACCGAUGGGUGCU  
>P1975  
GCAGGGCAGGCACACUGGCA AAGGCAGGCAGCAGGCGUGUA  
>P1976  
CUUGAUACCAUUUCUGUGCC AUUUUCGGGCUGUGGGAGAAA  
>P1977  
CUUGGUCUUUUUCCCACCC AACACCUACAGCCCGAGGCCU  
>P1978  
AAGACCCUCGACCAAGCAGG AAGAAGAGGAGGAGGCGGCC  
>P1979  
GCGCUGGGCACCGCGGCCGG AGCUGUGGGCUGGUAAGUCUG  
>P1980  
CUGCCAGAUGGCUUUGAAAA AGGUGAUCCAAGCAGGCCCU

>P1981  
AGGCACGCCUCAUAGUUUGCAAUCUCAGCCUCCACACACUU  
>P1982  
UGCUGUCCGUGGCUUCCACGACCUCCUUCUCCACUGGGCUG  
>P1983  
CGGGGCGGCCCCUCAGCGCCAUGUCCAGGCCUCCCUCCCC  
>P1984  
UGGGGGCCCCAUUCAAAGUAGC<sup>GG</sup>UUCUCAGCCACGUCCU  
>P1985  
CAGCGGCGUACGGCGUGGGUAGAAGGUGAAGUCCACGCGGU  
>P1986  
GUCUCACCUGGGCCCUGGUGAACAUGCUCGACCGAGGUCGU  
>P1987  
AGCGCGGGUGGCAGGCUGCGAGGCGAGGGCGACCGAGACUU  
>P1988  
UGAAGCAACACGACCCCUAUAUCACCAGCAUCGCAGACCUC  
>P1989  
CUCCGAAGCGGGGAAGUGGGACAAGAUGGUUUACAUCUCGA  
>P1990  
GCGGGCCAGUCUCGCCGCCGAGCUGCUCUCAGCCCACCCAC  
>P1991  
CCUCACAGCGUAAAACCCGGAGGGUACAGUUAGCGUCUCGC  
>P1992  
GCAGGUCCCAGCCCGGGGCUAGAGACCGAGGGCCGGGUCC  
>P1993  
UCCAUACCCUGAUUUUAUAGCAUCACGAACUGUCACCUGUCA  
>P1994  
CGGGAAGCCCCGCUGCCUCGACCGCCGCCACCGCUCCGACG  
>P1995  
AGGAGGCACCGCAUUUGUAAAAGGCAAGAGAGAAAGGAAGG  
>P1996  
CAGGCCGGAAGCUUCUGCGAGCCCUAGCGCUGCGGCCCCG  
>P1997  
AGAGGUCACAGGGAAGUCAGAGAACAGUAAUACGCUAACAG  
>P1998  
ACCUAGGCACCCCAUCUUCAAACCCGACGUCGUGACGACG  
>P1999  
UGAGGCCACGGUGGGGACCGAAGGGGACGGCUGCCCAGCCC  
>P2000  
GCGGCAGGCACAGCGCGGAAGACGGGGUGCGCGAUCCUCG  
>P2001  
UGGAGCCGUGGAACCGUGUGAGAAUCCCUAAGGCGGGGAAC  
>P2002  
GAGCGUAACUGUACGAGGUGAGAAUCCGUGCAUUUGACCCA  
>P2003  
CCCUGCCCCGCCUGAGUCUCAGGAGAAGAAGCCGCUGAAGC  
>P2004  
GCUCCCUUCAGACCCCAGGCAGCGGCUCCUCGACUGUCCC

>P2005  
CCAGCCUUGAUUCUUCGGGAUCACUUCUCCCUCGCCGCGC  
>P2006  
AGUUAAGUCAAAGCAGGAGAGUAAUUAUGAAUAGCGCAGC  
>P2007  
GCAGCGGGAAGGAGCCGGGCACAGCCAUCCUCAGCUCCGCU  
>P2008  
GGGAGCGGGCGCCGGAGUGGAGAAAGGAGCCAGCGGUGGGC  
>P2009  
UUUCUAGGGGCCUUGAGAGGAGGGGAAGGGGGAGGGGGGA  
>P2010  
GGCAUCUCGCCAUGGGGAGCACGGAGAGCAGCGAGGGCCGC  
>P2011  
CGCUCUGCUGCCUCCCUCUGACUGGCCGUCAGCUCCUCUAC  
>P2012  
UGGAUCCCAAGAAGAAGCCAAGCCUCAGGUCCGUGACUUUU  
>P2013  
CCUUAGCCAGGUGGCUGCUUAGGUCCACUGUGCGCUUCACG  
>P2014  
GGAAGAGGAGGAAGAGAUCAACAUCUAUGCAGUCACCGAGG  
>P2015  
GCCGUCGCGGGCCCGCUCCGACGCGGAAGGUGAGGGCUGGG  
>P2016  
GCGUUGCUGCAUUGCGCCCCACCGACUCCACUAUGUUGAAG  
>P2017  
AACAUUCUAGGUAAGUGACAGGAUGUUCGCCACACAUC  
>P2018  
CCUUCAAGCUCAACCGCAAGAGCUGGAGGGCGGGGGAG  
>P2019  
GCAGGUGGUGGCUUUGAUGGAGGACAACAUCUACGAGUGCU  
>P2020  
UGUUGUCGUCGGAGGGGUUGAGGUCGAAGGUGAAGAGCUUG  
>P2021  
ACCCGUCCGAGCCUCCUCGAGGGCCUCACCACGGGCGGG  
>P2022  
GAUUAGCCCAGGAAGACUCGACUCACGACUUCGGGGCGCCC  
>P2023  
GGCGGCGGAGGAGGAGGAGAGAGAGGCGGAGGCGGAGG  
>P2024  
CGUCGGCGCCACGGCCGAGACACAUCUUCGCCGCGGAGCU  
>P2025  
GGGACCGCGCUGCCCGAGAAAGGGACGGACCAUACGUGUG  
>P2026  
UCCACUUCUUGAGGGAGAACAUCUUGUCGCCUCCCGACUUG  
>P2027  
CUCCGCCUGCCGGCCGCGUAUCCCCGGCUACCUGGGCCG  
>P2028  
CCGGCUUCUCUGAGUCACCAACCUGAGGCUGCCCCGGCCGC

>P2029  
GCUGCGACCCGAACGGGUGCAGGUUGUACAGCUGCACCAUC  
>P2030  
GCUGGAAUUGUCCGAGGAGCAUAAGGAACACCUGGCCUUC  
>P2031  
CUCGAAGAUGGCCGGUUGGCAGAGCUACGUGGAUAACCUGA  
>P2032  
UAGCUAGCGUCUGGCCUGAGAACCUCCGGCGCUCGGCGGGC  
>P2033  
CGGCGUCUGCGAUGGUCCGGAGCGAGGCCUCGGCCAAUCUG  
>P2034  
CCGGAGCCUCGGUUACCUCC AUGACCCCCUGCUGGCCCCCC  
>P2035  
CGUUGACGUGCAAGCGCCGCAGUCCUGAGUCGUUUCUUA  
>P2036  
CAGAAAGGCCUCGGAGGAGGAGAAAUGGAGCAGGUCGGGC  
>P2037  
CCUGAUCCAGCAGAACAGCAAAAUGUGACCCAGGUGGCACA  
>P2038  
CGAGACUCGCAGUCGCGGCCACUCGAGUCACUUCGCCAGUU  
>P2039  
CCCUUGGCACUCGCCUCGGAUUUGGGGGCUUCCUCACUCG  
>P2040  
GCAGUGGCGGCGGGCGGCGUAAGCGGAACUUCGGCCCGAGG  
>P2041  
CCUCAAGGAGCCAUCCUGCGAGCUACGAACAAUGCUAGUUA  
>P2042  
CGCAGCGGCGCGGGGCCGGGAGGCAGCGGUGGCGGGGAGC  
>P2043  
GGCGCCGGUGCAGCCCCAGCAGUCUCCAGCGGCGGCCCCCG  
>P2044  
AAAGAGAAGGAGGAAGACAAAGACAAGAAGGAAAAGAAAGA  
>P2045  
CGCGCGGCCGAGCCCCACGCAGCCGCACAGACGUAGUCCAC  
>P2046  
UGC GCGGACACCU GCUACCAAGCGGAGCUUCAGCAAGGAAG  
>P2047  
CAAGGAAGAGGACUGCAGCCAGGACUGGAAGGAAAGCUCUA  
>P2048  
AGGGCCCGUCCAGCGACCCACCGGCCGGGGCUCUCCUCCG  
>P2049  
CAGGGACCAGCCCGCGGGCCAGGGGCCUGGAUCACCUGGGG  
>P2050  
GGCGUGCGUCCAGUCCACCACAGGCGUGGGGUGCAGGGGC  
>P2051  
ACAAGGCCUUCUCCUCUUCACAGCCUCCACAGCCGCCCGC  
>P2052  
CCGCAACCCGCUAGGCCUUC AUCGCGAGCUACGCCCGGACC



>P2053  
UUUCA AUGAUCCA AACUGUCAGUCACCCACCCAGCCUCAU  
>P2054  
UUGUUGGCAGAGGAGGAAGAAGAGGAAAAAAGACAGGCAGA  
>P2055  
CCGCCGCUGGGCCUAGCGGUAGCAGCGGCUGCUCCAGCGCG  
>P2056  
GGCGGCGGGGCUCCCGGGAGGCGCCUGCUCCCGCCCACG  
>P2057  
CGGCCCCAGGGGGCCCCGGGAGCCCUGAAGGGCGAAGCGGC  
>P2058  
AGCCGCUCAACGUCUUCUCCAGCUCGGCCACCACCAUGGUG  
>P2059  
GGGCGGCUCUCCGGAGCGGCAGGCUGGGAGGGGGCCGGGGC  
>P2060  
UACAGAAGAUGCUGAAGCUGAGGACACACCCAGGAAAAGAC  
>P2061  
CCGCUAGCUAGCCUCACCUCAGAAGCGAAUCGUGGGCAGCG  
>P2062  
GGGGACUUGCCUGGAGACCCAU CGCUGCCAGGGUCCGCGGC  
>P2063  
AAUGCCACGGCCAAGAGCCCAGGUCCUUCACGCUGGCCUCU  
>P2064  
AGCUGGAGAUUGCGCACGAGAGCUGAGGCACGCAGAGAGC  
>P2065  
CGCUGCGAGCCACGGCGGCAAGUACUCGCGGGAGAAGAACC  
>P2066  
GGGACAGGAGGCUGACCUUGAGGCUGGUGGGAGGAAGUCC  
>P2067  
GGGCUGGCGGCGGCGAGUCCACGUGCUC CCCGCGGCCGGUU  
>P2068  
CCAGCGUCAAGACCGUGAAGACGCGGAACAAGGCGCUGGGA  
>P2069  
GAAGCGGGGCUCUGCAUCCACGGGGUCCUCUCGGGCUUCU  
>P2070  
GUUUUGAUCUGGAUAAGCAUAUUGUCCAUCUCCACAGCUU  
>P2071  
CCACACAGCUAGCGCUCUGAAGUAUGUCUGGGGGAAACCC  
>P2072  
GCUGAAGCAGCUGGAGGAGGAGUGCCGGCAGAAGGAGGCGG  
>P2073  
CGGCCCCGCCCCGGGGCUCCAUUGUUAAGGCGGCUGCGGCU  
>P2074  
CAGAGGCGCAGCUCUGCUGGAGAGACCUGAGGCUUGCAGCG  
>P2075  
CAGCACAGGCCACCCUGAUAGUCACAUCCCACAGACACC  
>P2076  
GCUGGAAUCGACGAACAGGAAACUGGCAUGAAGGCAAAGA

>P2077  
UUCCAGAGCCAUGGGAGCGGAAAGGAGGCUGCUGUCAUUA  
>P2078  
CCGCCCGCCUCAGUGCCGGAGCCUCGGUGCGCGGCGGAG  
>P2079  
CUUCGAACGGGCAGUUAUUAAGGAAGAAAGCUGGCUGCUGU  
>P2080  
AGCAGCGGCUCCCGCUCCCCAUCCUCCUCCUCCCGGGCU  
>P2081  
GAGGCCACUGGGGCGGUGUUAGUCUGCCGGUGGGGACUCUU  
>P2082  
AGGGGCGUGCGCCGAGAGGGAGCUCAGAUCGAGCGGGGCGC  
>P2083  
UCGGCCAGACGGAGAGCGGCACUGUCUCCCGCCAGCGCU  
>P2084  
AGGGGCUGAAGAGCUUCCAGACCGAGAGCGGGACAAGCCAU  
>P2085  
GCUGAAAGAAGAGUGGGAAAAGGCCAAAAGGAGGUGGAAG  
>P2086  
UAAGGAAUAAUCCGAUCGGAACCGAUCUGUGGUUAAACCUC  
>P2087  
CAGGAACCCAACCCAGCCGACCUUGAGCUCCAGGAGUUCG  
>P2088  
GAUGGGAGCAGGUGCUGGCCAAAGUGAAACGGGCUGUGGUU  
>P2089  
GGAGCGGAGGCGGCAGGAGGAGGAGGAAGGAUGCGCGG  
>P2090  
GAAGCGAGGCAGAACUCUAGAAAAGAGGGGUGGUCAGAGAG  
>P2091  
UUUUGAUUUCAAGAGUUAGGAGCUCGAGAACCGUUUGGCAA  
>P2092  
AUCCCGGGCCGCCUUAGCUAAGGGCUGGAAUGAAGUACAGA  
>P2093  
GACAACAGCGGCGGCGGUGGAGGCGGCGGUGGAGGCGGAGG  
>P2094  
CCCUCUUUCCUGGGGAUGGAGAAGGCGACGGUUCGGUGG  
>P2095  
GGCAUCCGACCCUCCUCCCAGGCACCGCCGCCUCGGCCUC  
>P2096  
GCGGUGGUCUAGGGAGGAAGAGUUGACACACUUGGUAACG  
>P2097  
CGCCCGCAGGGAAGAAGCACAGCUCUGAGAAGAGGAGCUCA  
>P2098  
GGAUGACGAGGAGGAGGGGAGAGACGAGGAGGAGGAGGAGG  
>P2099  
CACCUCUAUCUCCUCUAUGGAGAGAGGCUUCCAGCCUCCC  
>P2100  
CUCCCGGGCGAUCUCGACACAUUUCUCAGCCUCAUCCUGU

>P2101  
CGCUGAAGCUCAAGCAAGCAAGGCAGAGAAAAGGCUAAUCG  
>P2102  
GAAGGGGAUGGGGAGGAGAAGCGCACACACGAGCACCCAC  
>P2103  
GAGCGUGGCCCGUAUCGUGAAGGUGCAGCUCCCUGCAUAUC  
>P2104  
CGAGUGUGAGUGUAUGUGUGAGAGCGCGGGUCUGUUGUCGG  
>P2105  
CGGUCAUGGAGAUCCTCCGGGAGCCUGUGCAAGAAAGUCAAA  
>P2106  
CUUCCGGGGACGUUGUCUGCAGGUAUGGAUGUUGUUCUU  
>P2107  
AUUCGAGCACUAAGAACGGGACACGGUACAAAGUCUCCAUG  
>P2108  
UUUCUUGAUGACCCUGAGCUAUGGCUUCCUCCUCAGUCCA  
>P2109  
CCGGUCUCCUCCUCGCGCAGCGGUGGCUCUGCGGCCGCU  
>P2110  
AGGUCAGGGGAAGGUGAAGCAGGACUGCAAAGAGAAGAAA  
>P2111  
CAGGCGCAGCCACCGGCGAGUCAGGAGCGCAGCGCCCGCA  
>P2112  
GGUGGAGGAGCGAGACUCCCACCCGAGCGCUCCCCUGCGCC  
>P2113  
CGGCGGGAACCAGAACCUCACUCCAGGCGCCCCACGAGCC  
>P2114  
UUGGUCAGUGUGAAUUGUGACAGCUGCAGUUGCUCCTCCG  
>P2115  
CCCACCUCGCGCAGGGAAGAACUCUAAUCACUAACGCAGU  
>P2116  
CUCCUGCGGUUGGUGAGAUUACCGGGUCUAGAGUGCGGAG  
>P2117  
UGGUGGCGCGCGGUGAGGAGAGCGCGGGCGCCCCUCCGGGG  
>P2118  
CCGCGAGAUGACUGCCGGCCACCGACACCGAGGACUCGCCA  
>P2119  
GCCGCCGCGGCGUCAGAGACACUGCGAGCGGCGAGCGCGGU  
>P2120  
UCUGCUGGCGCUGCAGCUGCAGAAUGGUCGGCGGUGGCGGG  
>P2121  
GAAGAACGAACCAGAAGAUGAGGAGGAGGAGGAAGAAG  
>P2122  
UCUGCGGGACUCUGAGGAAAAGCUCGCACCAGGCAAGAAUA  
>P2123  
GGCUGCAGGCCGCGAACACAGCUGCACCGGGAGACAGGCA  
>P2124  
CCCUGCCUCAGAAAGGCCAAUGCAGCUCGCAAGCCUGCCC

>P2125  
UGAUCCCGCCGGGGGAGUGCACGUACGCGGGCCGGAAGCGG  
>P2126  
CUAGCAUGAACAGUGUGAGGAUUCCACCAGCUUUUUCACCA  
>P2127  
UCCAUGGCGCCCCGAGAGCAGUGGGGACCCAACCAGGGCG  
>P2128  
GGGAAACUGCAGUCGAAGCACGGUGAGCCGCGGGCCGGUA  
>P2129  
ACUGACAGGGCCAGCCCACAGCCACAGGUGCGAUCAGUGC  
>P2130  
CCUGGUGGCCUGGGGGCCAGACCCGUGGGCAGGUGGGGCAU  
>P2131  
CUGGAACACGGACCUGGUGGAGACCCUGGAGCUGCAGAACC  
>P2132  
UUUAUGAUGAUAAAGACUACAGGAGAAUUCGGUUUGUAGGU  
>P2133  
GUUUGACCACCUAGAGGAGCACCGGAGAAGUUCGUGGAGA  
>P2134  
AUAGUAAACAGAAACCUCCUCAUCACUUCAAGGCAUGUAACA  
>P2135  
AGGCACAGGCAUCUCGUACAAGCGGCUAUAUCGGCUGCC  
>P2136  
GUGUCCUAAGAUUCCACUAAGUGUCUCAAACCUCCCCU  
>P2137  
GAGCUGUAACCAUUUUUAUUAGAGGAGGAAAUAAGAUGGUG  
>P2138  
UUGCCAGGCGAGAAAUAAGAACCGACCAAGCCAAACACCUG  
>P2139  
GCCGUCGCCGCCACCGCCCCAGGCAUCCCCCGCAGAGCGGC  
>P2140  
GGCGGCCAGGAGUUCUCGAGUCCCUCAAUUUCGACGAGA  
>P2141  
GGAACUUGGAGGAAGAAGAGCAAAGGCUGCCGUCGGGACG  
>P2142  
CCCAGCAAGGAGGAAGGGGAACCCAAAAAGACUGAGGCGCC  
>P2143  
CUCCCUCAUACCCACUCCAAAGGCUCCAGUGAGAGAAG  
>P2144  
AUGGGUGGGGGAAGGGUACAAGUCUGGUCGUGGAGGGAG  
>P2145  
AAACUGACGGGCGCAAAAACUGAGUGACUCCGCGGGAGGG  
>P2146  
UGGCUCAUUUGCGGUAUUGGAUCCAUGCCUAGAACUUUGUG  
>P2147  
AUGAUUCCCAUAUGCCCUGUAGUUUCUUUCACCUAUGGUGA  
>P2148  
AACGACCAAGAGGGUGUUCGACUGCUAGAGCCGAGCGAAGC

>P2149  
CCCUGACCUUGCGCCGAGGGACCAGGAAGGUCAGGUGCUCG  
>P2150  
GAAGAAGCCAAAAAGAAACGAAUAGAUGCGGAGCCGCCAG  
>P2151  
GAGGAGGCAGCCUAAAAUAAUACAGCAGCAGAGACAGAA  
>P2152  
GGCCGGCGGCUAUUUAAGCGAGGCCCGCCGAUCCGCUGCG  
>P2153  
UCUCACCCUUCACUUUGCCGAGGUGCCGACCCCAGCGUG  
>P2154  
UCGGGCGGUGAGGCAGGAGGAGGCUGCGGGUUGGAGCGCGC  
>P2155  
AGAAGGUCUCCAGCCGCUGAGGAUGGCCGCCUCCAGGCGG  
>P2156  
CCUGCCAAGACGUCGCGGCGACCCCGUCGCGCGGUACCCG  
>P2157  
GGCAGACGUUGUGGCGGAGAAGGGCAGUGGCUGUAGCUGCC  
>P2158  
CCCGGAGAAGGUUUUCGGUACUUUGAAUAAUCCCUUUUG  
>P2159  
UUGCGGCCCCGCUUGCGUUCACGCUGUCGCCCGGGCCGGCG  
>P2160  
UGGGCCCGCUUUCUGCCGAGAUGCCGAAGGUCAAGUCGGGG  
>P2161  
CUUAAGUCCAGUGGUGCAGGAAAGCUUCAGUUUGUCAUAU  
>P2162  
CUGCCAGCUCUCUUUCGCUGAGUUCUGUUUUUCCGGUUC  
>P2163  
AGACCGGGACAAGGAACGGGAAAAGGACCGGGAAAAAGACA  
>P2164  
GCAGCUCAGCGGGGAGAAGCAGAACACCGGAGCCCGACCA  
>P2165  
UCUCGGGGUCAUGAUGGGCAGCAAGAUGGCGUCUGCUAGU  
>P2166  
GGCUCAUGAGCAAGGUGGCAAGAUCAUCAAGUGAGUCAGAC  
>P2167  
UUCAACCUCCGUUCCCCGCCACGAAAACGCUCCAGCCGCC  
>P2168  
GAUGACCCCGAACCUGCUGCAUCUCGCCCCGGAGAACUUCU  
>P2169  
GCUAAGCCC CGUUGGGGCCAGGAGAGCUGGGCUCGAAGCC  
>P2170  
GUGGCAUGAUAAACAGUAUAAGAAAGCUCAUUUGGGCACAG  
>P2171  
CCGCAGUGUGUCGGGUGAAGAUACCCGCGGCCUCCUGUG  
>P2172  
GCACAGAGACGUUCCUCUCAAGAACGAUUUAACCCCUAC

>P2173  
CGGCCAUGAACUUACCCGGGACAGCGGCGGCGGACCUU  
>P2174  
GGGGCAGGUGGGAAGCGCCCAGGUCUAGGAGCACUGGAUG  
>P2175  
CACCUCUAUAUUCUCCCCGAUUGAAUUGAUUGUUCUUA  
>P2176  
GGGGCCCCGCGAAGCCGUGAGCCGUCGUUUUCUCCGAGU  
>P2177  
GACAGGGGCGGGAGAGGCGCAGGACUGCGGCGCCGAGAUC  
>P2178  
AUCGCAGCGGGGCAGGAUGACGCGAGCCCCGGAGCCC  
>P2179  
UCAGGACCAGAGCUGAGAGGAGCUGGGAUCGCGGCGGCAAU  
>P2180  
CCGCGCCGGUGACCAGUACCACCCGCCCGUCGAACCUCAGC  
>P2181  
GGGGGAAGGAGCGAGAGAGAGAGGUAACGCAGCGCUGCUC  
>P2182  
ACUGGGGUGAUUGAUGAGGAGAGUGGACAUGAAGGCGGCA  
>P2183  
GGGUGCGACCGUCAUGUCGGAUCCGAGUCGGAAAGCUGCC  
>P2184  
GAAGCGGGGACCGAAGGCACAACCGGCGACCUGCGCUCAC  
>P2185  
GGUGGAGGAAAAGCGCCGGGACUGGAGGAGGAGACCAACG  
>P2186  
UGC GGCAUGUGAUCAGCUACAGCUUGUCACCGUUCGAGCAG  
>P2187  
UCAUUUCCUCAGACUUGUGAACCUCCACUAAAGAUGCACU  
>P2188  
CAUACGUGGGUGGCACAGCCAUUCUUGCUAUGAUAAAAGA  
>P2189  
GGCCAGGGCCAUUGAGACGCAGGAGGGGUCUGGGCAUCGAGU  
>P2190  
CCCGACGUCGGGAAGCCGACAGACCUGAGCCCGCUGGGACC  
>P2191  
CGACGACAGCGGGCUCAUGGAGUUGAAGAAGGUGAAGCUCU  
>P2192  
CUGCUAAUAAAGUUGCAGCGAGGAGAAGCGCAGCGACGGCG  
>P2193  
CGAUCAGGUCGCCUCAGCCACGUCUCCUUUAAGGCCUCCG  
>P2194  
CCCGGCGGUGGUGGCGACGCAGACGCGGAACAGGGGGAGAG  
>P2195  
ACAGAGCCAUGGUCCAUCCGAGAGAAGCUAUGUUUAGCAUC  
>P2196  
AAUCGUCGUUUAUGGACAGGACAGGCGCCACUGCCGCCGUC

>P2197  
GCCGCGCCUUGGAGCUGGAGGAACCGCGGUAGGUGGUGG  
>P2198  
UGAGCUUCUUGAUCUCCAGAUCCACGUUCCUGUCGGCA  
>P2199  
GUACUAUCCAUUGGCAUCAUGUCAAAUGUAACUCAAUC  
>P2200  
GUCUGCUUCGGGCCUCUGGAUUUAGCGCUCGCCAGCUAG  
>P2201  
GUCGGCCUCCGCGGAUCUCCACAGGCAGCGCCGCUCCCCG  
>P2202  
GGUCCGGGCUCCUCAGGUUCAGACCCGACCGUUAUCCAGUC  
>P2203  
GCGGCCGCGCGGGCGGGCUGAGUGAGCAAGACAAGACACUC  
>P2204  
AGUUCUCAUACGGGCUGCAGACCCAGGCCGGCGGACCCAGG  
>P2205  
AGAGACAGAGACCGUGACCGAGAGCGAGAGCGAGAACGAGA  
>P2206  
GAGCGACGAGGAGGACCCAGACUCCAUGGAAGCCCCAACCC  
>P2207  
AACAGAAGGAGAAGAAAAGGAGGGCUGAGGAGACUUGACA  
>P2208  
GCGUCUCCUCCACCCACAGAAUCCGUCCCCGACGGGCAGG  
>P2209  
CCAGCCGACUGUGCAAUCCACGACAAUGACCCUGGCGACC  
>P2210  
GGUGGAGGAGGUCGCAUCAGAGGUGGUGGGCCUCGCAUCAC  
>P2211  
GGUGGUAGAUCAGGGGAAGUAGCUCCCGCCGCUUCCUGGCC  
>P2212  
ACAGCAGCUCAGGCCCAGACAGGGCCAGAGGAGGACUCAGG  
>P2213  
CCACAGACCCACAUGCCCAAGGCCUCGGGACUUCCCACC  
>P2214  
GGACCUCAGGUGGCUGAAGGAGAGAAUGUAUUUGGUGUCUG  
>P2215  
UAUCUCCAUAUCUGACCUAACUCCCUCCAGCCUCACUUGG  
>P2216  
GGAAGCAGGAGAGUUUGCCAUAAGGGAUGUGACAGCGGUUC  
>P2217  
GAUGAAGGUGGAGCCAAAUGACACAAUCUGGUCUCACUGAG  
>P2218  
UUCGGUGAGCCUGGCCGCCAGACGCACCCUCUUUGUUGCC  
>P2219  
UCCCCUGUGUUUGUUUCAGAGCAGAGUUCUCUGUGGAC  
>P2220  
CGGUGCUGUGGUGCAGAGCUAGUCCUCUCCAGCUCAGCCG

>P2221  
AAGGAGAAGGGAGUGAUAGUAAGGAGAGUCCAAAAACCAA  
>P2222  
CAACCUAAAGACACUACCCAAGGGCCUGUCUGCCAGCCUGC  
>P2223  
GUUGAUGUUGCAGGUGCGUUAUGGAUACAUAACCUGAGGAG  
>P2224  
GAGGGCGACAACGCAGUGCCACUCUUACAGGAAUUCCCUUC  
>P2225  
UCCAUCACUCUGAGACGGUACCUGAGAUUGGGGGCGACCA  
>P2226  
GCCUCCGCCUCCCCAGAAGCAACAUCCGAGGCUCGGCGCAG  
>P2227  
UAAGAAGGUGGAGACCGGAGAGCUGUGAGGUUGUGAGUAA  
>P2228  
AUUCACUCACGCAGGUCUUAACAGCCGCAUUCAUCUGAGGC  
>P2229  
ACGGGGUCCCGCACGGUACCACCCACUCCGCUCCUCAAC  
>P2230  
UGGAGAAGAGGCAGGAGGGCAGGAGCAGCACACAGACACUG  
>P2231  
GCCUCGUCCGCCACCUCGGACGCUCGUCCGGGCCCGCCGC  
>P2232  
UGGUCCCUGGCCCGCCGCGUAAUAGCCUCCGCGCGCCAG  
>P2233  
UGCUCGACCGAGGCACCUCCACCACCACCGUGUUCAACUUC  
>P2234  
CGCUCAUCACAAUGAGAGGCACAGUGAGGCCGUGAUACGCC  
>P2235  
GGCGACAGCAGAGGAGGAAGAGGAGGAAGAAGGAAAGAAAA  
>P2236  
CAAGAAUCAUUAGGAAGCCAAACAGCUUCACAGUUCGGC  
>P2237  
GGCGCUGGUUCCACUCCUCCAGGUCCUUCUUGGCCUUCUCC  
>P2238  
AACGGGAGGAGCGGGAGCGUAAGCGGCGGAAGGAGGAGGAG  
>P2239  
UGCAGGGGCUUAUUGCAGGACUCCUCGCUGGGCUGACCCU  
>P2240  
CCACCUCAUCUCCAGUGACCACUACAUCUGCACCCCCAC  
>P2241  
CAUGAGCGGGCAGCGGUGGACGUCAAGGUGGUGAUGCUGG  
>P2242  
GCGUGCCUCCAGGCUCGCAACCCUGAUGCUGCGCGGGUG  
>P2243  
GCAGCGCGGGCCAGCGGACAGAGCCCCGGGCCUGCGGGGG  
>P2244  
CCGAACGGACAGACGCGGACGGACGGGCGGACGGAGGAG



>P2245  
UUGCACCCAGCGUCUCCCUCACAAGACGGCCCGGCCUUU  
>P2246  
CCCGGAAAUGGAGAGGGGCACAUUGAAGUCCUUGCCCCU  
>P2247  
UCAGCUCCAGAAGCUGCUGCAGCGAAGACGCAAGGGAGCUG  
>P2248  
UGGGGGCAGUGGCAGCAGCACAGGGCACUCUGAAGCCUG  
>P2249  
ACAUCGGAGAGACGGAGAAGAAGUGCUUUAUUGAGGAGAUC  
>P2250  
CCCACCAACUCCGAGAGAACAGACCAAACUAACCACAUGAA  
>P2251  
UUCAGAGCGCCUGGCUGAGGAGUCCACUGAGGGGAGCACU  
>P2252  
CUACCAGGAGCUGCUGGUCAACCAGAACCCCAUCGCGCAGC  
>P2253  
GCCUCCCCGCCGCACUCUGCAGCAGGAAGCUCAGCCUCG  
>P2254  
AGCCCCGGACCUUACCACGAUCCUCUCCACCUUCCGUG  
>P2255  
GUGUGCGGGCGGAAGGGGCACGGGCACCCCGCGGUCCCC  
>P2256  
CAUCCAUCAUUGGCCCAAUCAACUAUUCUUCGAUCAGC  
>P2257  
CACUGUCAGUCAAGAGGAGGAGACAGAAAACCUAAAGCAG  
>P2258  
UCGCCUGCACCAGCGCUGCAUCCAGGCCAAGCCAAGCGC  
>P2259  
CUUGCUGGGGUCAGAGCAGCAGCUGCUUGGCUGUGAGCUGC  
>P2260  
CCCUGUGUGUGUGUGCUGAUGUUUCCUGGGUGCCCUGGC  
>P2261  
UGGCCCGCUCCGUCACCCACAGCGCAUUGGCCACCAGCACC  
>P2262  
GUCCAGCUGGGACAACAUGGACUAUGUGUGGGAGGAGGAGG  
>P2263  
UUUCUGUUUCCUCAGGCCAAACUGCAGGGGCACGUGGAACC  
>P2264  
UACCUGGCCAUCAGCAGACCAGGCCAGGGAGGUGCACUGGG  
>P2265  
CGCCGCCGCAUGACUGAGCAGAUGACCCUUCGUGGCACCC  
>P2266  
GCGGCAGGGCGGAGCGCGGCAGAGGGCAGGCGGGUGCCGG  
>P2267  
GGACGAGGCGGAGGCGCAGGAGGAGGAGGCCGUGGGCG  
>P2268  
GCACCCAGCUCGGAGCCCGAGCGUGCCUCGGCGGCCUGUC

>P2269  
GCGGAGACACGCGGGAGCUGACCUCACGAGAACCACCCAC  
>P2270  
GAUACUUCUCCAUUUUCUUCAUUUUAUACUCUUUUCAGAAUU  
>P2271  
UUCUAUUCAUGUGCAGCUGAACUACCGGGAAACUAGUGACC  
>P2272  
CACUUGGGAGCCGGAACAGCACCUUGUGAACUGUGAGGAAU  
>P2273  
UCCAGUCCCAGUCAUCAUCAUCAUCGUAUAACCCUCCUC  
>P2274  
CGCGUCAGAAGACUCCUGCAAGAGGAAGAAGCUGGAGGAAG  
>P2275  
ACGUCCGGCAGCCGCUCUCCACGAACUCGUUCAGCUCCUCC  
>P2276  
CGGGUGACAGCUCGGGAUCAGCAACCCUCCUGCUGCUGC  
>P2277  
CCGCGGCGCGGCGUCUGGCGAAUCACAGGGAAGGGGCAACA  
>P2278  
CGAGGUGUCGCCGAAAUGCAGCGGCGGGCGCUCUCCGUCC  
>P2279  
GCGGCGGAGGGCGGCUGCGGAGCGCCCGCGGGGCUGCACC  
>P2280  
CGGAUCCCAGGGGGCGGUGCAGGGCAAGUCCACAUCUUCGG  
>P2281  
GGCUGGGACCCAGGGGGCGACAGAGGCAGCAGCAGCCCGA  
>P2282  
CGACCUGCAUUUGGCUGCGGAGCUGUGGGGCCCGGCGCCUC  
>P2283  
UUGCGACCGAGGCAAACUCCACACACAGAAGUCGCCGCUUU  
>P2284  
UCUCCGCCCCUAGGAGCGCAAGAGGCCGGGAGUCAGGCGAG  
>P2285  
CAUGCCCAAGAGAAAGGCAAAGGAGAUGC UAAAGGUGAUA  
>P2286  
CUUCAGAACCUUGUACACAUAGAUGGAAUAGCUCUCCUUGC  
>P2287  
AAGGAAUGGACCAAGGAGACAGAAAUUAACUUGUAAAUGAU  
>P2288  
CCAGAAAAGGACGGCAAGAAGCGCAAGCGCAGCCGCAAAG  
>P2289  
UGGAGUUAAGAGGCGGCGGAAGCGAGGGCCUGUGGAGUCGG  
>P2290  
CCGUGGGUUCAGACUUGGUAUAAGUAAACAGCGGGUGGAG  
>P2291  
CGACACCACCGGAUGUCUACCGCAACAAGCUGCGCCGCC  
>P2292  
CCUCGACUCCUGCGACCCGCACCGCACCCCCACCCGGGCC

>P2293  
UUUUACUGAGGUGGCUGACCACGUCCACGACCAAUCCGCC  
>P2294  
ACAGAGAUACCUACAGACGGAGUGCUGUGCCACGUGAGUAA  
>P2295  
ACCAUGACUCCCUCCUAAAAAGGAGUUCAUAAAUGGCAAU  
>P2296  
GCCCGGUGCGGGCCGCCUCCAGCAGCUCCUGCUCCUCCCC  
>P2297  
GGAAGAGGCUGCCAGUCCUGAGGGGAAGAGGGUCCCCAAA  
>P2298  
GUCGGCGAGCCCCCGCGGCGACAGGUACCGGCGCCAUGGCC  
>P2299  
GCGCUCCAGGCCCGAAAGAAAGGACCAAGGCCAAGAAGGA  
>P2300  
GCUCCCCCAUCGCCUACUCGACCCCGGGGGCGGUCAGCACC  
>P2301  
GGCUCCAGUACCGGACUCCGAAACCCAAUCAGAGGCUCCAG  
>P2302  
CUCCUUGGAUUAUUCCCAAGAACCCCCACAUAACCCCCUC  
>P2303  
GCUGGAAGUUGAAAGGCGGAACAAAAGCGGCAGAACCAGG  
>P2304  
GAAGGCUUAUCAAGCCCUCAAAGCCACCCAGGCAAAGCAGG  
>P2305  
GUUUCUCCUGCUCUUCUCAGGCUCCUCACUGCUCCAUC  
>P2306  
AAUUUGUGUGCAGAUAGCAGAGGCAGCAGGCCGUGCCGGGG  
>P2307  
CCCCGCCCCAGCGCCGCCACUUCAGCCCGGCCCGCGCCC  
>P2308  
GCGGGGCUAGCGCGGUUCAGCGACGGGAGCCUCAAGGG  
>P2309  
CCGAAGCGAGAACAGCCAGAGUUGGACGAAAAGUUUCAG  
>P2310  
AACCCGGGGCUCCGAGCCGGAGCCGAGUCUGCGCCUGGGGG  
>P2311  
CGGUAAGGAUAAGAAGAAGAAACUAAGAAGAUCAAAGAGA  
>P2312  
GACCCUCCUUGGUAACUGAGACCAGGCUCUCCCAUCAAU  
>P2313  
GUAGUUCUUUGGCAGCGGGCAUGGCGGGUACCGUGGUGCUG  
>P2314  
CUCCCGCUCCAGGUUCCUUGAGCACUCCGACCGCGAAGC  
>P2315  
CUGGCGGUCGGGAGGAGACAGCGGCGGACGGUUGCGCC  
>P2316  
AAGACGGCCCGACCCGGGUCAGCACCAUCCCGCCCCGGGCC

>P2317  
GUCGCUUUGCUGUUCGUGAU AUGAGACAGACAGUUGCGGUG  
>P2318  
GGAGAGCGGCAUGAGGAAGA AUGUCCCUAAGGUGUUGGUUG  
>P2319  
CCCUGGGGCGCCGCUCCGCG AUUUGCAGGUGGACCACCCAG  
>P2320  
GGAGGGCGCGGUGAGAAGUG AUGAGGGCCAGUGAAGAGGGC  
>P2321  
UGGGGUGGCAGCGGCGCAGG AGGGGUCGCGGGGAGGGAGUG  
>P2322  
CCUGCCGCCGCCUGGUGCC ACCUCUUCGCCUCUUGUUGGC  
>P2323  
GGAUCAGCAAGAGGCGUUCG AGGUGCGAGAGGAGGUGCCCA  
>P2324  
GGGUUCGGGGACGGGUGACG AAAGAAGAGGGUGAGGGAAGG  
>P2325  
GGCUCCUAAUACGCCCGAGU ACGGUCAGUAGCUUGCGAGCG  
>P2326  
GAGCCGUGGUCACCAUCGGG AGGGCCCCAAAGUAACCUCGG  
>P2327  
CAGCUCGGAGCGGCCAUUGC ACGCGCCCCUCCACGGGCC  
>P2328  
UCCUCAUCAUCAACCCCA AAGCCUCUCAUCUAGUUUGUC  
>P2329  
GACAACACUCAACUGUGCAA ACCCGUCCUAUCGACAAAAG  
>P2330  
CCAGGCAGCCCUCGCAGCUC AGUGCUCUAGCCGGGGCAAGC  
>P2331  
GGCGCCCGGGCGGCCGGACG AAGCGAGGAGGGACCGCCGAG  
>P2332  
GCGGCGGCGGCGGCGGC AGCAGGAGCCGGAGCGACGGC  
>P2333  
AUCGCCCCACGUUCCUC AGCCCUUUUCUCUCCCGGCCG  
>P2334  
GCACUACCUUCUUUCCUCC AUCGCCGCCCCUGCUUCUCCC  
>P2335  
GCAGGUCGGCGGCUCGCCC ACCUGAGCCGCGCCGGGGCUG  
>P2336  
UUAGGUUUUCCUUGGUUGC AUCUGUCCUAACUGGCUAGA  
>P2337  
CCCGGCGGGGAACGGCCGCG AUCGGGGCCGCAGCCACGCUG  
>P2338  
GGCCAUACUGGCGGCGGUC AUGGUUGGCACUGCGGGCGGA  
>P2339  
UAGGCCUUUGUAAA AUUGAC AGAGAGGGGAAACCCCGUAAA  
>P2340  
CGCUCCCAGUCUCCAUGGA ACUCCCGCCCGGCCCGUUGC

>P2341  
UAAGUGAGGGUGCCCUUAGCAGCCUCAGUUUUCACCGUCAU  
>P2342  
CGAUGCCUCAGCGAGGAAUAAGAGGUCAACCCGGUGCCCA  
>P2343  
ACCGACCCAGAGGAGGCCACAGGCUUCUAGCUGAGAAGAG  
>P2344  
CUCUUCAGGUGCUUCUCGUAGUGCUGCCUGGCUCGCUCUU  
>P2345  
GGGAGAGGGCGCCGGAGAGGAGGCGGCGGGCGGGCGGAG  
>P2346  
CUUCCGAGAUUGCAACCCCAAGCACAGCGGCGGCAGCAGCA  
>P2347  
CGGCUCCUCCGCCCGCCAUGAGCGCUGCGGCUGUCGGGCGC  
>P2348  
CUCCUCGCGGCGGAUGGGUGACCUUUUCCUGGCACGGGCAG  
>P2349  
CUCCUGCUGUUCGUGGGCGCUACCCGCCUCCGGCUGGCUGAC  
>P2350  
GCGCGACGACGGUGCCCAGCAGUUUUCCCAAGAGUGAGACC  
>P2351  
UCGCAGCCCGGCGUGCCUGCAGCUGCCGUCGCUCGGGAGCA  
>P2352  
CAGCGCCUCUGUCCCUAGAACGGCGCUCCCCCGCCCUAG  
>P2353  
GGGCAACGGAGGGAGACGGCAAGUGCUGAGUUUCCGGAGG  
>P2354  
UCUAGGCUAUAGAAAGCGCAAUUGGUGGUAACGCUUAUCAA  
>P2355  
GUGGCUUCGGCAGCGGCUUCAGCAGAUCCGGGCAUCAGCG  
>P2356  
CAUCUUGACGGCAGCGAUACAGUCGAAUUCUGCUUACACC  
>P2357  
UUGAAACUAAGGGAUGAGGCAUCCAGGACCUAAUAAAAAA  
>P2358  
UCCGCACCAACGCGCCCGCCAUGGCUGUGCCGACACCAGAC  
>P2359  
GACCGAGCGAGGCAAGAGGAGAGCGCCGGCGGCAGGAGGA  
>P2360  
CCAUCUCGCUCUGUUCUCCAAGACGCCACCGCCUCCCUU  
>P2361  
CAAGUCUCUGCCAGGAGCCGAUACAUGGCUGUAGAGGACA  
>P2362  
CAGGCUCUCGUCCUCCUCCAGGGGCAGGCGGGCGGGGAGG  
>P2363  
CGGCGAUGGCCGAGCAGGAGAGCGCCCGAACGGCGGCCGC  
>P2364  
CGUCCAGCCCGGGCCUGAGCACAGCUUCGCCCUGAAAGUCA

>P2365  
CUCAAACACACUCAGUUCAAGCUCCACAUCUGCAGCCACG  
>P2366  
AGCAGCGUCGGCGCACACUCAAGAACCGCGGCUACGCGGCC  
>P2367  
GUGCACGCACGCCUGCCAUCAAAGCAGCAGGGCUGAGGGGG  
>P2368  
AUCUCCCCACGGACUGUACCAGGCAGCUGGGCCCCGCAGGA  
>P2369  
CGUCAGGGGACAGUACGGUGACCCGGCCUGCAGGUGGCAGU  
>P2370  
AGCGGGGGAGAAGUUGUGGAUGGCGUCCUGCACGAUGUCC  
>P2371  
CAGGCAGCAGCUGCAGGAGGAGCUCCGGCAGGUCAGCGGCC  
>P2372  
CACCAUCUUCUGGAGCCCCAAGGACAGUUCGUGGUGUUGG  
>P2373  
CGAUGUCGACGAGUUUCUGGACAAGUUUCAGUGCUGGCG  
>P2374  
CAUGGCUAGGCCUGUCCACAGCUCACCCACCCAUAGCUA  
>P2375  
GCUGUGGCAGCAGCUACGGCAGUGAGACCAGCAUCCCGGCC  
>P2376  
AGCUCGGGGUCCCCGCUCAAGCCUCCACCCGGCCCCGCGCG  
>P2377  
UGAGGAGGGGUCCUGGUGGAGGCUGGGCCAGGCGGUGCCC  
>P2378  
UUGUUAGGGAGAGAAGAGGGAGAGGCAGGAGCCGGCCCAAG  
>P2379  
CGGCUGCCAUGCUCUCCAUCAGCUUGCUCACGGCACCCCCC  
>P2380  
GCGUGAGGAGCCCUGGCCUCAGAGGGCAAGGCAGGAGCUCG  
>P2381  
CGAGAAUGUGGUCGAGAAGAAGACUUGGAGUUGGAGAAGG  
>P2382  
UGCCAGACUCGCCCCGUGGCAGACAAGAGGGCAGGGGCAUC  
>P2383  
UUGGAAGUUGCACACUGUACACUGUUAAGAAGUUGAGCUUU  
>P2384  
GCGGGCUCGGGGCGCGGCGGACGGGCGCGGCCUUGCGGGC  
>P2385  
AGAGGAACUGGAGGAGGAGGAGGAGGAGGCAGUGGACAUGG  
>P2386  
GGCAGAGGUCUCCGACUGGAAGGAGAGAACCGACCUAGCC  
>P2387  
GCGGCGAUUCGUGCAGCAGCAGCGGCAGCAGCAGCAGCAGC  
>P2388  
UGGCCGCGUGCUGGGAGGAGACUGGAGCCCCGGUUAGGAAGA

>P2389  
AGGCCGGUGCCGCUUUGGAGAUCCGGUGCUGGAACGAACAUC  
>P2390  
GUGCAGCGGCUUCCCGUAGGAGCAGCGUUCUGCCGGGCUUG  
>P2391  
UCUGCAAACUCGUGGCUCGUAGUUGAGAACUGGAAAUGCGU  
>P2392  
GCCCCGGUUAUGGAGGAGGAAGAGGAGGAUAUGGUGGUGGA  
>P2393  
UUUUUUUAGCAAAAAAUGGGAAAAAACAGAAUGGAAAGAG  
>P2394  
CGAUUUGGAGUGCUGGAGCGAGAAGAGCAAAAGCUGCGUU  
>P2395  
CGGCGGCGGCGGCGGCUGCAACGGGCGCGCCGGCAACUUCA  
>P2396  
UGGAGUCUUUGAAGCCACUGACCUAGAACACACUGAUUUUCA  
>P2397  
UAGCCAUGGCGGCUAACGCUACUACCAACCCGUCGCAGCUG  
>P2398  
GAGGGAGGGUGCGAGGGGAAACCGGAAGGAAGAGGCGGCGG  
>P2399  
GCGGCCGCGUGAGCCGCCGGAGCAGGAGCUGCAGCGACGUC  
>P2400  
UAGGAAACUGGGUCCCUUGAAGAAUCUACAGAUGAGUCUGA  
>P2401  
UCCCCCAGCGCCGUGUCCGAGCUGCUCGGCAUCGCCUAGA  
>P2402  
UUCUCCUCUUCUCCCUUCCAGCCCGGCUCUGGGUCGUUGC  
>P2403  
ACACCAACCACCACCACGCCAACUUCUCUCGGGCUGAAA  
>P2404  
GGGAGCGUGAACGCCCCUCCAGCCUUCGAGUCGUUCUUGC  
>P2405  
GGAGGAAAAGCGGCGGGCCGAGGAGGCACAGCGGCAGCUGG  
>P2406  
GGAAAAGAAGAGACAGCCAUAGACGAGGAGCCAGAGUGGGG  
>P2407  
GGCGCGGGCCGGGGGCGCCACGGCGAGGGGCGGGCCAGG  
>P2408  
CUCUUGGUUUGGUGACAUGUAGGGACGCUGCUGCUUGGGG  
>P2409  
GGGACCACCCCCAUCUCCUACCAGUCUGACAUUCCAGCA  
>P2410  
CACUGCGACACCGGCGACAAACGCAAUGCUCAGGGCCGGA  
>P2411  
UUUUAACAGGCAGUCAUGGAGUCAGGUAUUGCAGUUUGUUG  
>P2412  
CCCUAGCUGCCAGCAGACAAAGAACCUCACACUUCACAGCU

>P2413  
CCGCGCGCCGAUCGGUCGUUACCGCGAGGCGCUGGUGGCCU  
>P2414  
GCCACCAGCGCCUCGCGGUAACGACCGAGCGGCGCGGGCA  
>P2415  
GGAGGUGCUGAAGAUGCAGCAGGGGCGGCAGGGCUGGAAGG  
>P2416  
CUGGUGGCCGUUGGCACGGCAGUGUGCAGGGACUGGCUGAA  
>P2417  
UGUACGCGCUGGUGUGCGAAACGCAGCGCUACUCCGCCGUG  
>P2418  
ACCAACGCUCGGAAACCGCCAGACACCAACGCUCGGAAACC  
>P2419  
UGGGGAAGGGAGGGGUGAGAGGGCGGC CGAACUCCGGCU  
>P2420  
CCGCCGUCGCCAUCAGGGCCAGCAGCCCAAGCAACACCGAC  
>P2421  
GCUCCUCCCCAUCGCCGGCCAGGGCACCGCAGCUCCACGCU  
>P2422  
UCUUGUUUCUGCCUUCUGCA AUGUCCACACGAAGUGACCG  
>P2423  
CUCAGAAUAGGGCACCUGUAAGUCAGUCAGUGAAGUCUCUG  
>P2424  
GGUCCACCUUCUCUUCCGCACGCUCUCCACGAGCAGCCGG  
>P2425  
CUCCUGCUCCACUCCUUCACCUCCACUCCAUGAUGAUGU  
>P2426  
AGGCCCGGAAACCAGCAGCGAGAGCAGCGCAGUGAAGAAGG  
>P2427  
CAAUUCUUGAUCAGGUAGUUAUCCAGCAGGCUCAGCACAUC  
>P2428  
AUUUUGGCCCGUGUGUCGAUACCGCCUCUGGACGUGGU  
>P2429  
GUGUUGAGGACUUCGCUUCGAGGAGGGAAGAGGAGGGAUCG  
>P2430  
GCGCGAUCCCAGCAAGCCCACAGCCACCAGCCGCCCAUG  
>P2431  
GCGAAGGCUGCUCGGAGCAGAGCCUGGUUCCGAGGGGGCGC  
>P2432  
GGACGGGCUCGGAGCGGAGGAUUCGCGGACUCUGGGCAGUC  
>P2433  
ACGGGUGCGGUCCUUGUUCAGGCGUGGCAGCUGAUGGGCU  
>P2434  
AUGGCGGCGGCGGCGGCCCCACCGGCCCGGCUCCCCCUCGG  
>P2435  
UCGGCCGGCCUGAGCCCCAGAGUCAGCUCCCCUUCUCGCC  
>P2436  
GCAGAAAACCCUGAGGAGAAACCAGGAAAGAGAAAAGAG



>P2437  
CGGCGGGCGGGCUGCAGCUACGAACGGGACCGGAGGAAGC  
>P2438  
GCGGGGCCAAGAUGGCGCCGAGCGCCGGGUGAGCAGCGUCU  
>P2439  
GAUAGGGCUUUACCGGUACAUCCGGGGUGGCGUGCCAGA  
>P2440  
CCCUACUAGCCCGCGAGACCAAAACAAGAGGCCCGCGAGAC  
>P2441  
ACUUUCUCAGCUGUUCUCCACGGCCUUCGAGCAUCAAG  
>P2442  
CCCGGGGCCAUGCUGCCUGCAGCCACAGCCUCCUCCUGGG  
>P2443  
CCGCUCUGCUGGCUGGCGGGACAUGGGGAACGGCGGGCGCA  
>P2444  
GGGUUCGUCCAAAGGCCCAUCGCCUUCUUCGAUGCUCUUCU  
>P2445  
UGGACCUGGGGUCGCGGUACUUGGGCUGGCCGGCGAACC  
>P2446  
GCUGAAGCGGGAGCCAGCUACCUGGUGCAGGUACGGGCGC  
>P2447  
CUCGGCCCGGGCGCGAGCAGAGCCACUCCAGGGAGGGGG  
>P2448  
GGGCGUUGGCGCUGCGUGCCAGGGCCUCUGCCUCUGCGUCU  
>P2449  
GCUCCGGCUGCUUCGGGGCAGCCAGGUGGGCCCCGACAUG  
>P2450  
CUUUUUGGUUCCUUCUCGGAGUCUUCUUCUUCUUCUCCU  
>P2451  
UUGUACUCCCCCAGGUUUGACCCAGGACUCCCCUACCCA  
>P2452  
AGCAGGCGGCCCGGGUGGGACUCAGGUGGAGGAGGCGGCU  
>P2453  
GCGCGCGCAGGAGGAGGCGGAGGCGGAGGAGCGCCGGCUGC  
>P2454  
CGGGGAAGCCGGCGCCGAGGACAAGCGCUCCAGGAGGAGA  
>P2455  
UUGUGCCAAUGGUGGAGAAGAAAACUUCGGGUAUGUGAGCC  
>P2456  
CCUGGAAGUUGUCAUUCUCCAGGGCCUCCAGCUGCCGGUUG  
>P2457  
AAUUCGGCCAGCCAGAUCUCACAGCUUGAGCAGCAGCUGAG  
>P2458  
CCUGAAGAAUCCCCAUGGAACUGCCCUUAUCCGCUGUCC  
>P2459  
UGGUGUCCUUGUUAUGGUGAUCCUAGGAAGACACAGAGGC  
>P2460  
CACUUACUUCUCGCCUCGAAAGAGCAAGAACGACUCGAAGG

>P2461  
CCAGCAAUGCUUGCUGUCUGACUUCCUCCUCUUCUUUCUCC  
>P2462  
UACUCCUCGGUUCUGGUGAAGAGGCUGCGCGCUGCUGUUU  
>P2463  
CCCUAGCCGCUGGGCUCAUCCAGUGGCCUUCGCCGCUCUCU  
>P2464  
AAGCCGGACAUCCUCUGAGGAAGGAGGGAGAGAGAGUCAG  
>P2465  
UUCAUACUGCGCCGCAUCGAAGGCCGCUCCGGGCCACUCAC  
>P2466  
GGGUAGCCCAGGGCCGGGGAAGGGGCAGAGACCUCCUU  
>P2467  
UCGCGGCAGCAUGGCGGACUACCUGAUCAGCGGCGGCACCG  
>P2468  
CGACUGAAGACGGGAGCGCCAGAAUCUGUGGACUCAAGAGU  
>P2469  
GCUGGAGGAGCUGGAACUUGACGAGCAGCAGAAGCGGCUGG  
>P2470  
GCCCGCAAUUGGCAAUGGCAACGGCGGCGGCAAAGGGAAGC  
>P2471  
ACGGACUCAUCUAACAAAACAGCACCGACUCCAGCAUCCAG  
>P2472  
GCUGUGGCCCGGGGCUCCCGAGUCGCGCUGCGGCGGCUCUU  
>P2473  
GGCAGCUGGACGCCGAGAUCAGGCGGACAAGGAGAAGGGG  
>P2474  
GCGCCUCCUCGCCUCCCCACCGACAUCAUGCUCAGUUC  
>P2475  
GGGAGAGCAGCAGCGGCCAAGCAGGAGCUGCAGCGAGCCG  
>P2476  
UCACCUGACGAUCUAACCCGAGCAGCCCAGCCACGCAGGGG  
>P2477  
UAACAGCGCAAUCCUAUUCUAGAGUCCAUAUUGACAAUAGG  
>P2478  
ACCCCGCGCUCGGCGCCGCCAUUUCGCUUUUCCCGGGCU  
>P2479  
ACUUCUUCUGCGGGGCGUAAAGCCGGAGCCGAGACCGAA  
>P2480  
AUCUCCGGACAGCUGCCCAAGGGAUUGCAAGUGCUGCGGC  
>P2481  
UUCUCGGCCAUCCCGGUUCGACCUUCUAGGGAAAGCAGGCG  
>P2482  
CCGGUUUGACCUUCUAGGGAAGCAGGUGAGCAGCCUGCGA  
>P2483  
UGCCUGCCUAGUGCUGGAGUAGGGGACAAUGGGAUCCUAG  
>P2484  
GAGGCUCCCGGGCGCCUUCGAGGCUUCCGUCCUGGGCCUG

>P2485  
GCCCAAAGCCCAGCCUGGGCACC GCAGCUACAACCUUCAGG  
>P2486  
AGUGGCGGUCAGGGGAAAGAAGGGCCGGUACUGGAUCUGGC  
>P2487  
CCCCAACGCCAUCCCAGCCCAGCGCAGCCAUGGCAGCUACC  
>P2488  
AGAGCCCGCAAGCUCUCCACAGAUCUGAAGCGGUGCACCUA  
>P2489  
CGGGCGGUUGGGAGCGCGCAGCUAGCGAGCGAGAGGCAGC  
>P2490  
CAGGUUCCUCCCGGCUCCCCACUGCGGAUCCUCGCGGCUC  
>P2491  
CCCACACUGGUUCUCCGGGACGCCCUUCCAAAUCAGCCUU  
>P2492  
AGGGAGACGUAGAAAAGGAAAGAAGGCGCAGGAAGCAGAA  
>P2493  
CCCUGCCUCGCCUGCCCCUCAUCCACGCCGGCCACAGCUCG  
>P2494  
GCAGUCCUGGAGCUGUGAGGAGAUUCGGGCGUCACCCUGC  
>P2495  
ACGUCUCACGUUUUCCAUGACAGAUGGCACUGUUCAAAUG  
>P2496  
AGACUUUUUCCUCCUGUCCAGUGGCCAAGGAAAGAGGGA  
>P2497  
GGGUUAGACAGGUACCGGUCAGAUUACGGUGGCACAGGCGG  
>P2498  
CGCCCAGCCUGCGCCCGCAGCAUGCCC GCCCGGGCCG  
>P2499  
GCCAGGAUGGAGUUCGUGAAUGCCUUGGCCACCCCGAAGA  
>P2500  
GGCGGUGGGCUGCCGGCUGCAGCGCUGCGGGGCCCGCGGC  
>P2501  
GGCCGGAGUUGCGUCGCCUAGUCCUCCUGGCUGCCGCCGU  
>P2502  
GGAGCCGGGGCCGGGCGCAUCAUGCUGAGCCGGCUCGGG  
>P2503  
CUCUGCUGGGGUCUCAGCGGAUUCGGGGGUCUCUGUCAGGG  
>P2504  
GGCAGCGGUCAGGCGGGGAGCGUGGGGAGCUGGGGGCCGU  
>P2505  
AGGUCCAGCCAUCCCUGGACCUGGGGACCUCUCUCCUA  
>P2506  
GACGAUGCCCGAUCUACUUUAGGGCUGAAACCCACGGGCC  
>P2507  
CUGAGGUCAACUCCGACCGAGAAGCCUGGCGCUGGGACCA  
>P2508  
CGUGGCAUUCGUUCAGACUCAGUUGUUGGGGGGAAGUCCCA

>P2509  
ACGGGUCCCUUGUGUGGGGGAUGGUGUGUGGCCAAAACUGG  
>P2510  
CGCGGAGGAUGGAUGGGGACAGCCGAGAUGGCGGCGGCGGC  
>P2511  
GGGAGGUGCAGAUGGCAGGAGGCGGCGGCGGCGGCGGCGG  
>P2512  
UCCCCUCACGGUGCGGCCGCAGCGGGCCCCGCGCCGGGCUC  
>P2513  
GUUUGGCAGGCAGACCCAGAAAUCCCUGGAGCGCGGCGGAC  
>P2514  
AGGACGGGGCGUUCGUGGGGACGCAGUCGGGGCACCAGGAA  
>P2515  
AGGCGGGGCUGGGGCGGCCAAACCCGGGGCUAUGACACCCC  
>P2516  
UCAGCUGCGCGGGCCCCCGGAUCCCCGACAGAGCGGCGGC  
>P2517  
GCCGCACCCACCGCCGCCCCAGCAGCAGCACAAGGAAGAGA  
>P2518  
GGCAGAGGAGGAGCUCCUGGACAUGGCGGUGCUAAAGGACU  
>P2519  
GCCCCGGAACCGACCUGUGGAGACCGCCAUCUUCUCCUGCA  
>P2520  
UCAGGAAGCCCGCGCGCAACAGCCAUGGUGAGGCGGCAGUC  
>P2521  
GCAACUCGGCCUUUCCUGGGAGGGAGUGAUGGGGCGCACCG  
>P2522  
CUGAGCCCGGCGAGCAGGAGAGGAGGUCUUCGGGCCGCGG  
>P2523  
CUCUCACCUAGCCCACAAGGAACCGCUCGCCGCCCGCCU  
>P2524  
CGGACACCCUGAAACUCACCAGAGACCCGUUCGCCCCCGGC  
>P2525  
GGGCUGGUGAGGGCUGGCGGACCUCCUUCAGUGCGCGGGGG  
>P2526  
CAAGAGAAAGGGAGGCCGGCAGGGGCCUGGGGGCAAGAGGA  
>P2527  
GCCCCGGUUCUGCUCUCCCCAGCUGCUCACCGACUCGCCGC  
>P2528  
GCUUCGAAAGGCAAGGAGGAAGCUUAUCUAUGAAAAAGCAA  
>P2529  
CACUCGUCAGUCCCGCAGCCACCGCAGCCGGGUCCCCGCGU  
>P2530  
CUACCAGGGCUACUGGGCGCAGGGCAAGCGGCACGGGCUGG  
>P2531  
GAGAGGCAGGAAGAGCAGAGAGGGAGCCCGCCUUGAGGGC  
>P2532  
CUUCGCAGGCGCUGAGGGUGAGAGGCACGCUAAACUGCUCG

>P2533  
AAGUGGCUGGAUGGUAAUUCGAAAUGGUAAUACAAUGCUGC  
>P2534  
UCAGAGAGCAGCCUCCCCGGAGCACCAACUCCGUGUCGGGA  
>P2535  
GCGGCCGUCUCCUCGCGCCGGAGCCGGGGAUCGGCCGCUGCC  
>P2536  
UCCUCCUAGCCAAAUUGCUCACUAAGACCAAGUCCUCGCU  
>P2537  
AAAAAUCAACCGGAAUUGAAACUACUCAACGGCCGCAGAA  
>P2538  
ACCCGCUCAGGAGGGGAAACACGAGAGCCGGGAGCACAACA  
>P2539  
CUUCCCAAGUGACAUCGUAAAGCUCUGAGACCUUCGCCAUC  
>P2540  
UGGUGAUCUGGGGGGAAGGAAAUUCCCGUCGGCGGCCAGU  
>P2541  
AGGACUCGGUGUUCGAGGAGAGGCCGGAGCGGCGGUCAGGA  
>P2542  
CCAGUUUCCACCCUCCUCAGGGCGGCGUCCUCUUCUAU  
>P2543  
GAGGUGGGUCUAGGCAGGGGAAUUGGGGUGCCACCAGACG  
>P2544  
CGGGCGGCCGGCUAGGGUGGAGAGCCGGGCGAGCAGAGCU  
>P2545  
GACGACGAGACCUUCAUCAAAACAUCAUCAUCCAGGACUG  
>P2546  
GGCUUAGGCGGCAAUCUCCAAUUGGGGCUUGGGGGCCAG  
>P2547  
UGCCUCCUAGGAACGCCGGGAAAGGUAUGGGCUUUGAGAAG  
>P2548  
GAGGAGGAAGAAGAGCGGAGAGAGAAGGAAGAGGCGAUGUG  
>P2549  
CAUGGGGGUCUCCAGGAAGAAACCAGCCUUGGGGGAUUCC  
>P2550  
AAGCGCGGCUGCUGUCGCCCAGCGCCGCCCGUCGUCGUCU  
>P2551  
CAGGUGGCUGAGGCCAGGGCAGAGCUGAGGAGGGCGAGGGC  
>P2552  
UUGUCGAACCAGAUCUUCUCAUGUGCUAGGAAGUUUGUAGC  
>P2553  
GGGCUCUGGGCUGGUAGGCAAGCCAUCCAGAAGGUGGUA  
>P2554  
GGGUGCUGACGACCUGCGGAAGAUGCAGGAGGAGGAAGGUG  
>P2555  
UGUUUCCUCCUCCUCCUCUACCUCCUCCUCCUGAGGACUA  
>P2556  
CCUCGCUCCGCCGCCCCUCGAUGCUCUCUUCAUCACCUUG

>P2557  
UCCGGCACGGCCUGCAGCGAAACAGUGCCGCUUGUCCACCGA  
>P2558  
GUCAUCAGGCAGCCUCAAGCAAUUCCUCAAAAAGACCAAGA  
>P2559  
GGCCGACAUGGAAGGCACUUACUAGGGGAACAGAGGCUGGA  
>P2560  
CAUCGAGGAGCGCCUGGCCAGCUGCGCAAGGCAUCGGACA  
>P2561  
CAAGGUGCCCCUGGCUACCACCCGUGGAUGUGGAGAAGG  
>P2562  
GCUCUUGUCGGACCAGGGCUACCGGGUGGACGGGCGGCGCG  
>P2563  
GGCGAACCGGGUCCGACAGGAGGCCAUGGCGGGCAGGGC  
>P2564  
GGCAGUGGCCUUGUCGUCGAAGUCUGGCCUUUCCCGAGGCC  
>P2565  
CUCUCAGCCACAGCACCGGCAGCGAUUCUGGCGUCUCCGAC  
>P2566  
GUACCACUGCUGCAGUCCGACAGCAUGCUGCUGGUGCUGU  
>P2567  
CCAAAGCCAUCCAAGAAGAAAGCAGAAGGUGGCGGCGCAGA  
>P2568  
CUUGCUGGGGCUGAAGAGGGAGCCCGAAUCCCAUACAGCA  
>P2569  
GGGCACCCACCACUCACCUCUACAGCUCCGGCUUGUUCCC  
>P2570  
CAGCCUUCUGUUUGACCCCGAGACCUCUCCUCCUUUGAGCC  
>P2571  
ACUCUGAAGGCAGCUCGCUCACGGCUUUCUCCACGGCCAGG  
>P2572  
UUGGUUCUGGGACCGGGCAGAGUCAGCGUCGUACAGGCUAG  
>P2573  
GCAGCACCGCCCCGGCGUGACCUGCUGGUCGUUCCGGCG  
>P2574  
CGGGCUCGGUGCGACUGCGCAGCUCCUCGGCGCUUCCUCGG  
>P2575  
CAAGCAAGCCCAGGCAGCCAAGAGAAGAAGAAGAGGAGGA  
>P2576  
CGCCAGCGGCCGUCCUCCAUUCUCCUCCGGGACUUGGC  
>P2577  
AAGAGUUUUACCAGCUUCUGAGAACCUGAUCAAUCCAAGC  
>P2578  
GAAUGUGUCACCGCGCUGGAAAGUUCAAGGUUACAGCCCC  
>P2579  
CAGUGGUGGGAACGACAAACAGGUUUCUCCCAUGAAGCAGG  
>P2580  
ACCGAAGGUCCUACAGGGCCACAACUGCCCCCGCCACAACC

>P2581  
CGGUCCACUCGUCCCGCGCACGGAUGGCCUCCAAGUGGCU  
>P2582  
CCGGCGAACCUGACCCAAGCAGCGGGACGCGUCCCGUGCG  
>P2583  
GUGAUUUGUGACAAAUGUGAAGGUACGGUGUUUUUUUGUUU  
>P2584  
GCUGGGGCCUCGUCCCGGAGAGAUACGGCUAUGUCGAUCGA  
>P2585  
CAACUCCUCGUCCCGGGUCGAGCGGCGCCGGGUUUUCUUCU  
>P2586  
CGACUGGUCCCUUGCCUGAUAUCUGGGAACCCCCCCCAC  
>P2587  
GGAAGGACUUGAGCCGGGAAAGGGAAGGGGAAGCGAGAAUG  
>P2588  
AACCGAUCCUCAGCAACGCCAGCAGGCGUCAGAGGCGGACG  
>P2589  
UGCACAGUGAGGCCUGGAGCAGGGGCCGGGAUCAACAGAGG  
>P2590  
UUCAUGCCCUAGGGCCCCCAAGUGCCUGCCCUCCCCAGA  
>P2591  
GGUCGUCCACUGCACCCCCAGGGCCUCCGCGUCCUCCUG  
>P2592  
CUCCCUUCUCCUUCUGCGAGCGCUGGGGAGAGCUCGGCC  
>P2593  
GCCUCCCCUGUCCAGUCUCUAGCUCUCUUCUCACGCACCA  
>P2594  
CCAACUCUGCCGGCCGCGGGACCCGGGUGAGGGUCUGGGCC  
>P2595  
GUUGGGUCGGGUGGCAGUUGACUUGGUGGCUGGCAUGUUCA  
>P2596  
UCCUGUCGCCUCCUCGCCCCACUUCGGCCUGUCCUCUCUC  
>P2597  
CCUGAGCGAGGAGGCCAAGGAGCCCGGCGGAUCAACGACG  
>P2598  
CCACCUGCCUGGGGGCGUCCAUUGGUGCGGCGGCCAGGGCGG  
>P2599  
CAGUUGUUGGUCCGACCAGAACGCUUCAGUUCUGCUCUGC  
>P2600  
CUGUCCGGACCACGGAAAUAACGACGCCGCCUCGGCCGCCG  
>P2601  
CCAGCUCGGCGCCGAAGCACAGGCGGGCCAUGUUCUCCUUG  
>P2602  
UAGCCCCUUUCGGGGCGGGACCCCGGCCGCAGGUACCCA  
>P2603  
CGGAGAAGAGGACGACGACGAGGUCCUCGAAGUGGACCCGU  
>P2604  
UUUCUGGAAAUUGUCCAGUCACGUGCAUCUUCAGCCAAU

>P2605  
GCCGGAGUGGCUGCGCGCCGAGGUGAAGCGGCUGUCCCACG  
>P2606  
CCACCUUGUCGUCCUCCACCACACACUGAAUCUGUAGCUUC  
>P2607  
CGGUGGUGCGGGGAAACCGAAGUGGGCGGCGGCCGCGGCG  
>P2608  
AGAUGAAGAUGAGGAUGAGGAUGAAGGUGGGCCUAAUGCAU  
>P2609  
GUGUCCUGAGACUGUCCACAUGAAGACUCUUCUGGUA AUG  
>P2610  
AGAAAGAGAACGGGAGAAGGAGAAGGAGAGAGAACGAGAGA  
>P2611  
GCUUUGUAGCGGCCCGGCUAGAGAGUUGUUCUGUCCCUG  
>P2612  
CGCUCGCGUGGGCGAAUGUGACAAGCCCCACCCCCACCGC  
>P2613  
UCGGCCCGACCGCGCGCGGGACCCGCGGCGCCGGCCCGGGA  
>P2614  
ACAGCCGUCGUCAGACUCCAGCAGCCAAGAUGGUGAAGCA  
>P2615  
CUGCCGGCCGGCGCUGGUGAUGCUGCUGGCGCCCCUGCUG  
>P2616  
CCAACUUGAGCUGCUCUACCAGCGCUGCAGGGCGCUCGCG  
>P2617  
GGGCUAACCGCGAGCAGAGGAGCAGGCGGCGGCAGCAGGG  
>P2618  
GCCGCCACCUCCUCUGAUCUACGAAAGUCAUGUACCCAAC  
>P2619  
AGCCUUUCUUCGUCUUCAUCAUUGUCCUCAUCCUGCUCUU  
>P2620  
UGGUGAUCACGGCAUUGGGCAGGUUUAGGUCCUCGGGCCUC  
>P2621  
GACGUCUCCGCGUCCCCGGAUUCAGGUUCGCGACCCCCG  
>P2622  
UCGGGGCGCCGAGCCCCUAUGCCGCAGCCUCUGGGCACC  
>P2623  
ACCUUGAGGAGGAAAGCGAGAAAGAAAAGAAAAAGCAAGU  
>P2624  
GGAGCGGCGGGAGCAGGAGCAGGAACAGCAAGAACCAGAGC  
>P2625  
UUGCAGGUCCAUUCUGGAUGAAGAGGAGGAGCAACAGAAAC  
>P2626  
GCGGAGCCUCCGGGACGGCGAGCGGCGGGCGGCGGAGGAGG  
>P2627  
GCCUAAACUUAUCUCAAUAACAGCCAUUGCUGCCAAGGAG  
>P2628  
CCAGUUUCCGGACCUUUGGAGCUUGUAUCCCCUCUUGC



>P2629  
CAGAGAGAGCCGCGGCCGGGAGCUCGCGGGCUCCUGACAAC  
>P2630  
UAUUAACCAGACUCAGAAAGAAAACCUCAGGAAAUUCUACA  
>P2631  
UGCCGCGGCUUGUUAUUCUUAAAUGGCGCCGCUAGACCUG  
>P2632  
CCGCCUCCACCAUGCCGCCGAGUUCGACCCCAACGAGAUC  
>P2633  
CUGGGCCCUGAGCUGAAGGCAGAGCUCGGCCCGCGGCUGAA  
>P2634  
GCGGUGGUGGGAAGCUCGGAGCGCUGUGGGAUGGGGGCGU  
>P2635  
GGGAGAUUUCAAAGCCUUGAGAAGAGAACCACAAUGCA  
>P2636  
UCCCCUUUCUCUCCCGCAGAGAAGCUGAAGAAAACCAAGA  
>P2637  
CCACAUGUGUGACCUCUCUGACUUCUCUCCUCCACCAAGG  
>P2638  
GUCCUGGGUGUUGGGCUGGGAGGGUGGGCGGCCGUGGAGG  
>P2639  
AUCUCUUCUUCAUCCUCAUCAUCCUCUUCUUCUUCAUC  
>P2640  
UUGCCUGCAGGUAACCUCGAGGCUAUGGCAUGGCAUCCCC  
>P2641  
CCAUGGCUUCCGGCUCUCCAGGUCCUCCGGGAUGCUUGGC  
>P2642  
AGCUGAACCCCGCCCCAGAGCCCCAGCAGGGCCCUCCG  
>P2643  
GCUCUUCUUUCCACAGUUGAGAGAAUAUCAGCAGAGGAAU  
>P2644  
GGCUGCGCCUUGUCAGUGGAGGUGGAGUUCGGGUGAGUCA  
>P2645  
CCGCAACGCCCGCAGCCUCCAGCCACGGCCCCAGCAGGAGC  
>P2646  
CCAGAAACGCCGCCUUAUGAAGUCGUUGAAGUCGGAGGCCA  
>P2647  
CCCAGCUGCGGCUGGAGGAGAAAACACGGGAAUGUGGGACC  
>P2648  
ACGCCUCCGCUCUCCUCCUCAGCUCUGCCCAGGCUGACUUC  
>P2649  
GGGCUGCCUCUCCAGCUGCCAGGGAACACUUGAGCGGGAAG  
>P2650  
CUCCGGCGCCGCUUCCCGGGAAGUUUCAAGUUUGAAAGUCC  
>P2651  
GAUGACAAAGGUCUGGUCCCAGGACUGUUCGGCCACCUGCC  
>P2652  
CCUCACCGGAGUCUCCUCGGAUGUUGGCUCUCCUGGGGGAGGU

>P2653  
CCAGGGUCAGGCCGGCCCGCAGCGCCCGCAUGGCCGGGGAG  
>P2654  
ACCUCGGACCUGCAGAGGGAAGGUGGGAGAGCUUGGUGCAC  
>P2655  
AAAAAAUUGGAAGGAUCUCAAGCUGAUGAAAAACUGGAGC  
>P2656  
GUCUCUGAGCGGUCCACGAUACCCUGCUCGAUCCGUGACUU  
>P2657  
CCAGAGUCAGAUUGAGGCAGAACUGAAUAAACAUUGGCGGC  
>P2658  
CCGGAGGGGCCAGGCUGGCCACAGAGGGCACCACAGGCAUA  
>P2659  
CCUUCGGGCCAAGGUCGCUGAGUUACAGCCGCCAGCCGGUA  
>P2660  
UGAGGCUCACAGCAGCGCAAAGGUAGCAGAAGUGGCCGGGC  
>P2661  
GCACCACGGACGGCGCCAGCAGCAGGCCCCAGCACGGCC  
>P2662  
UCGGUUGGUUUCUGCAGAAAACGAUGUCCCAGGUGCAGGU  
>P2663  
GGAAGAGACCAGAGAGGUACAGAACUUGAGGAAGAGGCCCA  
>P2664  
GAGAUCCCCGCGACGGCGGAAGCCCGGAGUCCGCGCGGCC  
>P2665  
CGUCAUAGCCUUGUCCUUCAGCCACACGAGGAUGCACGAG  
>P2666  
UGACCUGAUGGAGUACGAAAGGUAUGGCCGAGUCUCCCA  
>P2667  
ACAGUGGGGACUCCCGGCCGAGGAUGUACACCUGGCCCUUG  
>P2668  
GCGACGGCGGGGGCGGU AUGGCGGAGCUGGUGCAGGG  
>P2669  
UACACAAUGGCCUGGGCAGAUUAUACAGACAGCAGGUCGC  
>P2670  
CCGGGGGGCGCGCGGGCCGAGCCGGGCCUGAGCCGGGCC  
>P2671  
CUGUGCUGCCAAACUCAAGCAGCUGGACCAGAAGUGUAAGC  
>P2672  
UCAUUCGGAUGACUACGUGCACAUUUCACUCCCCAGGCCA  
>P2673  
GGGGCCCGCCGUCCCCGUGGAGCUGAGGGGGAGCGACGCA  
>P2674  
GCGAAAGGAGCUGCGGGCGAAGAGAAGGCCAGGAAGGCUG  
>P2675  
GGCCAAGAAGAUCUGCUCUCCAUUCGGCCCCGGAACAGCAGG  
>P2676  
CCAGGUGGAAGAAAGUUUCCAGCUAGGUCUGGCCCGUUGG

>P2677  
UGAAAGUGCCUCCUGCGAUUAACCAGUUCACCCAGGCCUG  
>P2678  
ACCCGGCGCUCACCCGUCCCAGCCCCGCCGCCGCAGCCCC  
>P2679  
UGGACAUCCUCCGGCAGCUCACUCACUUUCUGUCACAGCAG  
>P2680  
CAACGAGGACAUGCCGGUGGAGAGGAUCCUGGAGGCUGAGC  
>P2681  
GCGAUCUCCAAAGGCCCGGAUGUCGCUUACAGAGUCACCA  
>P2682  
CUUGUCCCAUAUUCAGGGUGAGACGGCUUUCUGGGUUUA  
>P2683  
GGGAGAAGCCUUCACUGUCCAGGGUCAGGACGUGCACGGGA  
>P2684  
AGUACGUGGAGAAGAUGGAGACCAAAUGAAAGGACUGGAG  
>P2685  
GCGGAGCGCGCUGGCCUUCAGCCUCCGGCCCCCGCCCGGC  
>P2686  
CUCAAUGUCCUGUCCACGGAUCAUCACUGUCUGAAUCUA  
>P2687  
GGCCUGCUCGGCCGAGCCGCAGGACGCUUGGAAGCGCGACG  
>P2688  
AGGCAGACGGGGAGCCCAGCACCGGGAGGACCGACUCUCGC  
>P2689  
GCCCCUUCACCUGCAGGGCGACCCCAGCCGGCGACGCGUGA  
>P2690  
GAGGUUCGACCCCGACGGGGACGCCGCUCGGGGAGAGGGGU  
>P2691  
CGGGGUGGGGGCAGGCUCCGACCUGGGGGCGUCCUGGCCGCG  
>P2692  
GGAUGACAUCGUGAAGGUUGAGUCUGGGAUGUAGUAGACA  
>P2693  
UCCUCUGUGCCCCUGUACCACCCUCAGAGGCCUGCCCC  
>P2694  
GAAGAAGAAGAAAAAGGCAAGAGGUACUGGCUACUCCCC  
>P2695  
GUUUCUCAGGGAUGUGACUGAGGCCAGGAGGGACCUGUGA  
>P2696  
AUGAGGAGUUGUGCGGCCCGAGGAACACCCCCGAGGCCAGC  
>P2697  
UGCUCUGCGAAGGGGAGGAAGCGGGGAGGGGGACCGCGG  
>P2698  
CGUGUAGGCCGGCAGGUCGACACAAACAGGAUGAUGACAC  
>P2699  
GUCACCUUCCAGUACCACAACUACACCCAGCCCCGUGGCA  
>P2700  
CCGCGGCGCUGAGGCGGCGGAGCGUGGCCCGCCAUGGGCU

>P2701  
GCCCCGCGCCAUCAUCUCCAACCCUGCAGCAGCACCUCU  
>P2702  
GCCCCAGCGCAGCCGGCGGCACCAGGCCGGUGCUCACGGUG  
>P2703  
CAGUCCACCAGCUCGUAGAAACACAGACGAGACCUACUGC  
>P2704  
CCAGGAGGAGGGCGCUGAGGAGCGAGGCCAUGUCCUCGGUG  
>P2705  
GGACGACGAACUCCGGGACC AUCUCCUUGAUCUGCACGAAC  
>P2706  
CGACGGCCAUGGUGCAGAGCAGGCGGCCGCGUCCCCACAG  
>P2707  
CGAACCUCUCCAGCCGGCAGCCUCCGAGUCCGGCCGUG  
>P2708  
CGGCUGGGAGGAGGCGGAGACUACGACGGUCGCGUCUUUU  
>P2709  
UCCGCGCCCCACCAUGCCCAACAUCGUGCUGUUCAGCGGCA  
>P2710  
UGCAUCUUAACAAGUUA AACAGCUAAAAGAAGUAAAAUAAG  
>P2711  
UCAGUUGCUCAGCAAAGUCC AACUCCAUGCUCUCCCCUGCU  
>P2712  
CGGCUGCUGCAAGCCCAACC AACUGCUC AAGCCCCGGAACA  
>P2713  
CAGCAGCACCCCAGCUAGGGACAGGGCUCCGCCGCGCCCC  
>P2714  
CUGUGCGUCCGAGAGGCAAC AAGGUUUGCUGCUGCCUAUUG  
>P2715  
AUGCGCAAGGCAAAGAAGAG AUCGACAGUGUCGGUUUUUCA  
>P2716  
AACCUCACCAAGGUGGUGAG AUCCUGACGCGAAAGAUGCGG  
>P2717  
AAGGAGCCAACAAAUGCAC AAGUGUAAAUUCUGUGAAUAC  
>P2718  
CGGGACCAUGGCACCUGUGC ACGGCGACGACUGUGAGAUAG  
>P2719  
GGCUCCAGGUCCACCUCUUC AACUCCAUGGGCUCAUCAA  
>P2720  
UCCUGUUCGUGGCCGAGACA ACGGCGGCGCUCAGCCUGAGC  
>P2721  
UCAUUGGCGCCGUGAACAAC AUGGACCAGACGGUGAUGGUG  
>P2722  
CCAGAGCGCUGAGCCCCCAAGCCUCAGUUGAGCCGGCCC  
>P2723  
CAUCCUGAAGAGUACCGAG AACUCGGAGUCUCCGCUGCU  
>P2724  
UCCUCGCACCUGCCCCUUA AUCCCUCCUCGCCCCCGCCC

>P2725  
UCCUCCCCUUGCUCGGUCCGUAUAGUCCUGGUCCCGAUAGUC  
>P2726  
GCAGAGACUUCGAGCAGCCUACUCGGGACGGGCUGGGCAGU  
>P2727  
ACAAGGGGCCAGCCUAGAGGAGCAGACGGGGUCAGCGGAUG  
>P2728  
AUGGGUGGGUUGACAGGCCAUGGGUGGGGUGUUUGGGCAGG  
>P2729  
AACUGACCAGCUCAGCGAGGAGCCAUAUAUGUGCAUAUGUGC  
>P2730  
CUCGGGGAGGAAGUCCCCACAUAUCCAAGUCACCAGCAGAGC  
>P2731  
AGGCCAAACUGGAUCGGUCAACAUGGUCUCCCCUCCCCA  
>P2732  
UCGGGUGGACUACGAACACAACUGAAGCCCUAGGACUUGU  
>P2733  
AUAGCCCGGGAUCGGGGACCACCUCCGGGGCUGCCUCCGGU  
>P2734  
AAUGUGAGCGUCCCGAGCGAAGGGAUCUAGUUCGUCCCUU  
>P2735  
GGGGCAAGCCUCCUCAACUAUGACCUCAACCGGCCAGGAU  
>P2736  
UCCCCAAUCUAGCGGAGGUAAGAAGAAAGGCAAAAUGAAG  
>P2737  
GGGACCGGGCCGAGGCCCGACCGGCCUGGCAGGGCUCGCC  
>P2738  
UGGCUCUUGGUCCUAGGUUCAGGCUGGGGAAGACUCUUGU  
>P2739  
GUGCCUUCGGUCGUCAGAGCACCCACGCGUCAGCUUCCGC  
>P2740  
AAGUGAAGAUGUCUGGGAAGAGGGGAAGAUUCGGACGACU  
>P2741  
UGGCCAGAUGCUGAUUCUUCAGGUCUUGUAGCUGAGCCAUG  
>P2742  
AACACAUGGUCACGACGGACAUGCACAGCCAUGUCUUCUUU  
>P2743  
AAGAAAGGCGAGAGAAGCGCAGGAAACAACUGGCUGAGGAA  
>P2744  
GUUUACAGAUUCGUCUGGAGAAUGGCUUCGGGGUGUGCAC  
>P2745  
CUGGCUCCCAAGAGGUUGACAGUGACCUGGAGGAGGAGGAC  
>P2746  
GGGAUUCGGAGACCCUGCAAGGGGUGGCAAAUCAGGAACC  
>P2747  
ACCAGGAAGGCGGAGGACGCAGGAGCCAAGAGCAAGGGACG  
>P2748  
CACCGCCAGCAGGGAGGCGGAGGGCUAGCGAGCCAAGCGGU

>P2749  
AGCCUCGGCUGCCACGGCUGAGAGCGCCGCCACCGCAGCUG  
>P2750  
AGAAAUGAUGACCAAGAGGAGGAAGAGGAGGAUGAAGAUG  
>P2751  
UCUGUGAUGUCAUCAACAACAUGUUCUUAUCUUCUCUUG  
>P2752  
CUUUCGGUACCACGCACUCCACACGAGAUCCAUCCCCUGGG  
>P2753  
CAGUGCUGAGCACGCAGUACACACGGCUUGGAUUCGGCUGG  
>P2754  
UCCCUAGUGCUAUGCUGGAAUGAGAAGAAGAAGCGUGAA  
>P2755  
CGGGUUCAGUCGCCACUUCUACUUCGUCCAGUAACUGUCUA  
>P2756  
UAGGGGAGCAGCCAGAGAAGAGCUGGUGUUGCUGGCCAGA  
>P2757  
UCUCGGCCGCCGUCCUCUCAACCACCGCCCCCUUUCGGC  
>P2758  
CCAAAACUCACCCUCUACCGACUGGUAUCUCCUCGGAGUAA  
>P2759  
GAGCCACCGUGCCCAACCUCACUUGCUCUUAUCCUACAC  
>P2760  
CCAAGAUGCCGCCCAAAGGAAAAGUGGUUCUGGAAAAGCG  
>P2761  
UUUCCUUGCCUAACGCAGCCAUUGGUAAGCCGUUAGUUAGC  
>P2762  
CCAGUAUGGUGCAUUCUUGAUUGAAGCAUAUGCACUGCAU  
>P2763  
CACCACGCGCCAGCGCUAGCACUGGCUUCCCGCGGUCUAGA  
>P2764  
CGCUCUCAAGCCCGCCUCCAUGAGUAGCUGGUUGAGACCC  
>P2765  
UUAAGAUGAUAACUGAGAACAGAAACACAAAUGCUCUU  
>P2766  
GCCUUGCCAUUGUUUGCUGAUGCUUCGAACUACAGGAAA  
>P2767  
UAGAAAGCGACAUUUUGGAAUACAGCUGGGGAGAGAGGUC  
>P2768  
UGGAGUAGAGGAGGCAGAGGAGAGGAGGCAGGGGACGAGG  
>P2769  
AGUUGAGGAGAGGUGGGGUUCAGGGCACAGGUGACAGGGC  
>P2770  
CUUCCAUCGCACGGGCCUCCAUUGCACGGGCCUCUAAUCCU  
>P2771  
CUCGGGGAGUACCCCUCCUACUUGCUGGGGGAACCUUCU  
>P2772  
CUGCGGGUCCACUGCACCCAACCCGCCGCGGAGGAAGAGG

>P2773  
UGAGCCCAACUGCAGAUCUAAGAGAAUGCUGGCUAUUAAAA  
>P2774  
ACUUGGGCGGCCAGUGCAGCAGGAUCUCCCCUCCCCCA  
>P2775  
CGCACCCUCUGCUCGCCCCGACCACUUCACCCUGUCCUGGC  
>P2776  
UUCUCCCCGGACUCUCCGUC AUGGGCGUGUGCUUGUUGAUU  
>P2777  
ACGUUUAAGAAGGGGCAGAAUCGCUGGGGAGUGCGGCUUC  
>P2778  
GCGACGGCGGGUACAACAACAGCUGCAACACCAGGGAAA  
>P2779  
GGUCCGGCAGAUCCCCUCACACGAGGAAGGCCGCACUGAC  
>P2780  
AGAACCGGAGUGGGGACGGGAGCGAGAACCAAGGUCGGAGC  
>P2781  
AGCAGCUCAGUCCUGCAGUGAGAGUCUUGGGAGUCCAUAGC  
>P2782  
AGACCAUUGAACCCGAGAGAGGAAGAGGAGGCACCGCGGC  
>P2783  
GACCUGAUGCUGCCUCCACAUAGUGCCAGAGCCCAAGGC  
>P2784  
AUCGCCAUCCACCGCAUCUCACCAACAGACUGUGGCUCUA  
>P2785  
AGAACCACGAACCUGCGCUAUGGAGGCCUCUCUAGGAGGG  
>P2786  
GCUCAAGAGGAAGCUGACAAACGCAAGAAAGAACACGAGAG  
>P2787  
CAGCAGGUAACUGGAGCGCUAUUCCUGGAACAAAGACAAGC  
>P2788  
CCGCGCCCUGAGCAUCGAGAACAGCCAGCUCAUGGAACAGC  
>P2789  
GCUCGAGACAGGCAGCCUAGACCAAGAACCGGAAGGAGGAA  
>P2790  
CAUGCAGAGAAGAACAUAAGAGAAAAACCCAGAGGUCCCU  
>P2791  
CAAGACGGGCGCUCCUCUCCAUACUUCCUCAGUGGUGAC  
>P2792  
CCCCGGAGGAGCACUGAAGGAGAAGAUCUGUAAGUAAGCCU  
>P2793  
AAGCUGGGCUCACCUUCUUGAGCUGGUCAUUCUCCUCAUG  
>P2794  
AGGAGGAGAAGGUGGAGAGGAGAGACGCCCCUCUGCCCG  
>P2795  
CCGCAGCCAGGUAGUGACGGAGGCCACUUGGAUGUUGUGUG  
>P2796  
UCCCGGCGGCACCGCGCAGCACAGCCAGCCGGGCUCGGUUC

>P2797  
CGUGGUGCUGGGUGCCAUCGAGAACAAGGUGGAGAGCAAAG  
>P2798  
CACAGGGGGGUUGGAGCACACCCUCUGUGUUGGGAAAGGA  
>P2799  
CACUCUGCCUGCCUAUGCCCACAGAGCCUAGAACAGCAGGG  
>P2800  
CCGGGUCCUCCACGUACACCAGCACCUCUCCUGGCCAGCA  
>P2801  
GGUUGGCGAUGCUCUUGCUCACGCACUUCAGGUGCUCGUUG  
>P2802  
CAGUGAUUGUGGCCGCCCCAGCCCCUGCUGCCCCAGCCUG  
>P2803  
GGGUGCCUGGAGUCCCGGUGACACCACGGGGCACACUGAGG  
>P2804  
GGCCCGGGACCCUACCUGCAGGCUGCACUCGCGGCCUGC  
>P2805  
GACCGAGCCACGUCUCCCCACGGCCAGAGAAAUCUCCGGC  
>P2806  
GGACAUCAGGGGGCUCGAGAUUGUUGCUGGUGACAAGGAAU  
>P2807  
ACCCAGGUGGAGGGCAUUC AUGUGGCUGUUGAGGCGCUGG  
>P2808  
CCUUCUGGACAAGCAUGGGAAGCCACAGACAGCACACCUG  
>P2809  
UGAUCAAGAAGGAAAAGAAGAGAGUAAGAAGGACAAGAAG  
>P2810  
AGGAAAGCGUCAGACUCGAGAUGAACCGCCUGCACCGCCUG  
>P2811  
CCGGGCCCGUUGGCGGCGUCACUGACGCUUCGCUCCGGUCC  
>P2812  
UCUCUUGCCUGCUGCCUGUGACCCUGAAGAACAGAAUUGAU  
>P2813  
AGUCCUUGACGCACUCCUCGAACUCCACGGUCAUGGCUGCG  
>P2814  
GUGGGCUGAUGGUACCACCA AUGUGUACCGUGUGGGCCACA  
>P2815  
CCUCGUGUUCAGUGCGGCCACGGCGCAUGCGCCCCUGCG  
>P2816  
CUCAUCCUCCUGUGUCACGCACCCCGAGGGCGCAGGAGGC  
>P2817  
AGAAGGAGGGCUUCCCGAUCACGUCCCUGAGGGAGAUAAC  
>P2818  
CCCUUGAGGAGGGGGAGCUGAGAGAUACUGCAUGGAGAUC  
>P2819  
GCCGCGCGGGACUGGACCGAGCCUCGCCGGCGCGCACCUG  
>P2820  
CACCGGAGUCCAAAGUUGGCAGCCAACAACAACAACAA



>P2821  
UCUCCCUCACGGCCGCGGGAAGGAGGACGGCGGGGCACGGG  
>P2822  
GUUUAACCAGGCUUUUCAGGAUGGGACUUCAGACCAAGGAC  
>P2823  
CCGGCUCUCUCCUUCUCCGAGCCUCGGCACGGCCCUUGC  
>P2824  
GCUGCGGAGCUGCCAGCCGACCUGGCGCGCUGCGCCCCGC  
>P2825  
GAGUGUGAGCACCGCAGCCAAGCACCGCGCGCCCCGGCAA  
>P2826  
GCGGCAGUGCCACCAGCAGGAGGCGGUGUGGGAGCUGCUGC  
>P2827  
UUCUGUGCAUAGGUUGUGGAAGGAGGAGAACCCUUGCUGA  
>P2828  
GCCUCUUCUGAAGAGCUGAAAGCUGCCUACCGGAGGCUCUG  
>P2829  
GCGCGAUGUCCGGGCCCCUGAGCCCGCGGCUGAGCCAGC  
>P2830  
GAGUGCCAGGCGGGUAGGGGAGCGAGCCAGGUGGGGACCG  
>P2831  
GAGAGAAAAGAGACAAAGCAAGAGAGAGUGAGAAUUCAAGG  
>P2832  
GCAGGGCCCGUCACUCCGACAAGUGCGCGUGUCACGCGGCC  
>P2833  
CGGGGCCAGACAGAAUCCUAAUGAGGGCUGCCAGGAGACC  
>P2834  
UGUGAGGUCACGGUGGAGGGAGAGGAGCUGAACCACGAGCA  
>P2835  
UCGAAACCCGGAACUUCAGAACCUCUACUGGACGACUUCU  
>P2836  
GGUGCAAGGCGAGGAGGAGAAGAGGGAGGACAAGGAGGACG  
>P2837  
AGCACCGCCUCUCCAGCUUCAGCCAGCGCGCUCAGCGGGCG  
>P2838  
GCAGCCAGCCCAGCAGGGCCAGUAGCAGCAGGGGCCGCAUG  
>P2839  
GCUUCUCCAGAGCUUUCUUCAGCAGCCGGACCUUCUGCCCU  
>P2840  
UGGCUGAAGUCCAAAAGACAAGAAAGAUUCUGAGUUCUCUUC  
>P2841  
CAUCCUGGGCCUCUCUCAGCAGGUGUCACUUGCCCCUGGGC  
>P2842  
AACAAAUCCAAGACAUACAACUGAAGACAAGUGAGCCAGA  
>P2843  
CCACUCUCAAUGCCACCGCACAGUCCCCACUCCAAUUCU  
>P2844  
GGCGGCGGCGGGGGCACCCGACGAGGCGGCCGAGGCGCUGG

>P2845  
CCCCAGCACGGGGAGAGGGCAGGGGGUAGCCAUGAGAAACC  
>P2846  
AGAGCCAUGUCCCUGAAUCCACCAAGCUCAAGGUGAGAGU  
>P2847  
UGUGUGCCCUCUCCUCAGGCCAAGUUUGAGCUGAUCACCUCC  
>P2848  
GAGCGAACCCGAGAGCGUGGAGCGGGCUGGGCCAGGUGAGG  
>P2849  
GGGCGGGGUCCAUUGAGUAAAGCCUUGCGUGCCUGCGCCCG  
>P2850  
AGACAGACGGUUGGAAAAAAACUGAAGAUCACACAAAAAG  
>P2851  
ACCAGGCUCUGAGUGAGGACAUACAAAAGGUGACCAAUGAC  
>P2852  
GAGCAGGUGCAGACGUUGCGAGGCGAGGUGGCUGACCUGGA  
>P2853  
CCUCGCGUGUGCCUGACCCAUGUGCACUGCAGCCUGCCUC  
>P2854  
GCUGGGGAGGCAGGCGCCUCAUUAGGUCCAAGGCACAGUCC  
>P2855  
CUCCAGCUCCCGCGCCACGAGUCAGCAGGGUCCUGCCCAG  
>P2856  
UGUGGCUACCUCUGCUCUCCAGGGCUUUGUGGCGGUGCCUC  
>P2857  
UGGGGUGGGGGACGAGCUAGACGGAGAGACAGGGGAAAGA  
>P2858  
AGCAGCGGUACCGCCUCCUCACCCGGCGGGCAGCAGCGG  
>P2859  
CACCUGGGUCCGUGCAGCCCAGCACCUCUGGCCACUCCGGG  
>P2860  
UAGCUGGAACUCGUGCAGGGAUGGGUCGAUCUGCAGCUGCG  
>P2861  
CCCGCACACUCACCGCCAGCAGCCGCCCGUGCAGCAGCAGC  
>P2862  
CUAUCAAAACCUUCUGAGAAUGACUCGGACUCUUCGUGCA  
>P2863  
GAAGCUCCCCAGUCACCAAGAGACGUUCACCUUCAUUAUCA  
>P2864  
UGGAAGAAGAUAAAAGACUAAAUUACCUGCAAUUGGGAA  
>P2865  
CUACUCCUCGCAACUUACUACAGGGCACUAGGGCCAGAGC  
>P2866  
CAUGAGGCGGACAGGCCCCGAGGAGGAGGCCUGCGGCGUGU  
>P2867  
GCCUGAGGAAGAAGUGGGGAAGGAAGAGGAAGAAGAGUCUC  
>P2868  
UCAUGAGGCCCAGCUCAAGAACGGCAGCCUUGACUCCCAG

>P2869  
CGGCCGUUUGGCAGCCCGCGAGGCGGUCCGCGGGAGCACAC  
>P2870  
GUCCAGGCCGAUGGGUUGACAUCAGGCAAGCUCCCAUCUG  
>P2871  
UCCUCCUGUCUCAACCUCCCAGUAGGAUUACAAGCAUGCG  
>P2872  
AGCAGCAGGUAGCACAAGAAAGCGAUACCGCCUUCUGCCG  
>P2873  
UGUGUUCACCUCACUGUAGAAGGUCAUAAAUGCUUCCUCGG  
>P2874  
UUGAGUGCAAGAUGAGUUAGACCGAUUCUUUAGCUUCCUGC  
>P2875  
CCCAAGCGCAUAGCUAAAAGAGGUCCCCCAGCAGAUGC  
>P2876  
AGUCCCUUCCCAAGAGCCUGAAUCCUCACAGCCCCGUCUCG  
>P2877  
GGCCCCUAAGACUGGGAGGUAGGUUGGGAUGUUACAGGCUG  
>P2878  
CUUGGGGGAGGAGGAAGUGGAGGAGGCGGCUAUAUAAUAG  
>P2879  
UGCAUGUGUCUUGAAGAGAAAGCAGUGCUUUGGCAGGACU  
>P2880  
AACCAGGGCGUCGCCUCCAGACUCAGGCAGCCACCCACCC  
>P2881  
AUGGUCUCAGGCCUUCUGAAUUCAUCCUAAUUAUUCUAUG  
>P2882  
CAAAGAAGAAGAAAAGAAGAGAAGCACAAGAAGAAGCAC  
>P2883  
GCCAUGAGCAGUUGAGUGGCACAGCCUGGCACCAGGAGCAG  
>P2884  
GGCGGCGGCGGUCUCCACGAGUCCGUCUUGCUGCUGCUGC  
>P2885  
GCCAAACAUAUCCAAUCCAAAAGCAGCCAGGACAACCGGA  
>P2886  
UGGGCCAGGCAGGGCUUGGGACUCCGUUUCUUCUUUUUGUC  
>P2887  
GUGUGGGGAGGAGGAGGACGAUGAAGAGGAAGAGGAUGGGG  
>P2888  
GUGGCACGCAGCCGCUGCUGAAGCGGGCCUCCGCCGGCCUG  
>P2889  
UGCCCAGGGAGAGGUGGCAGAGUUGAGGGUGAGAAGAGCG  
>P2890  
GUCCCGCUUCAUAAACUCCAAGGCUUCAGAGGACUGUGGGA  
>P2891  
UUCCCAGCCGAGAACCAGGAUCUUCUCCUGGCCCGCGCG  
>P2892  
UUGAUCGCCUUCUGUUCUUCAGUCAAAUUGUAAUCUCUAAC

>P2893  
UGGAGCCAGGAAAGCCCACAAGCCCAGAGCACGUUGUUUAU  
>P2894  
CACAGGCAGGGGUAGGAGCUACCGGAGAAGGGAGGGGUGC  
>P2895  
UAUUCAUCAAUUUCUCCCCAUCAUACUCAUCUUCGCUUCC  
>P2896  
GAGUCUGAGGAAGAUGGAGAAGAGAAGGUAGAGAAAGAAGA  
>P2897  
UGAGCUCUUCACCCUGACCUAUGGUGCCCUGGUCACCCAGC  
>P2898  
GGUCGCCAGGACCCCCCAGAGCCAAGACCUUCUCCAGAAG  
>P2899  
ACCGGCACGGCUGCAGAGGGAUGAGUGC GGUCGGGUUGCGG  
>P2900  
GGCCCGGAGGCGGGAGGAGCAGGAGGCACGAGAGAAGGCGC  
>P2901  
GAGCUGCCCCCAGAGCAGCAUGGAUGCCCCGGAAGGGAC  
>P2902  
UGAGAGGCUCGCACGCCUCCAGCCCGGCCCGCCCCCGG  
>P2903  
AGCCAACAUGGCGAUGCACAACAAGGCGGCGCCGCGCAG  
>P2904  
CCGCGACUAAGGGAAGAUGGAGACAAUACUGGAGCAGCAGC  
>P2905  
CCCCGCUUGGCCCGGCCCGCAGGUAGGAGCCGCCGAGGGAC  
>P2906  
CCGUAGCCGAAGUCCUUUGGAAACGAAUCGGCCGCGCCGUA  
>P2907  
GCCGCUCUCCGCUUCCGGCAAGAACC GCCCAGCAAUCUCCG  
>P2908  
CGCUUCUCGGGCGCUGCAGCAUCUGGACCCGCCGGCGCCGC  
>P2909  
CCUGAGGGCCUGGUUGCCCCACUGGACCCUCUCGCCUUGG  
>P2910  
GUCAUCUGCGUCCGGCACCCAGGAGGCUCGUGGUCCGCCUU  
>P2911  
UGUUGCUC CCCUGUCUCUGGACGACGCUGUGACUGAUCCA  
>P2912  
UGGGCCGGCGACGCGCGCGGAGCCCCGGACAGCCAGUGAAC  
>P2913  
GCUCGAUCUUAUGCGGCCAACUUCUGCAAUCAGCGGGAG  
>P2914  
UCUUGGUACAAGUUCACAACAGCCUCCAUCUGGCUAAGGA  
>P2915  
AAGAGCUGGCAACGAGGAGGAGUGCCCAGAGGAGGACAUGG  
>P2916  
GCGCGGCACAGAGCCUCGGGAGGCUGAUGCAACUUUCCCUU

>P2917  
GGAGGAAGAGGGCAACAGGCAAGAAGGGCGCGCCGCGCCUCA  
>P2918  
CCAGAGGUGGAGACGGUACUACCUCCCAGCUCUGUUUCCA  
>P2919  
GAGGUCACUUCUGGGAAGCCAGAACAGGAAGUACCAGAUGC  
>P2920  
CAAGAGCCGGAGGUGAACGGAGGCAGUGGGGAUGCUGUCCC  
>P2921  
CGCGGCGAGCCGGGCCGAGCAGUGAGGGCCCUAGCGGGGCC  
>P2922  
ACAGGCUGACAGGAGAGAGAACAGGCACUGCGGGACCUGCA  
>P2923  
UCUGUGCCUCCAGGGGAGGUAGCCGGGGGCUGCUCCGAGC  
>P2924  
GAUUCUCCUUACCCCUCCACAAAUCAAGACUGGACAACUGG  
>P2925  
GGGGCCGCUUCCUAAGGCCACUGGAGGUGGGAUCUCAUCC  
>P2926  
CUCCACCUCCAUGUUCUCCA AAAAGGACUUGACCUGCUCCU  
>P2927  
UCUCUAAUUGGCAGUCUUGGAAGCUUCAUUUUGUAGUUCU  
>P2928  
AGCCAUGGAGAGUGACUUUUAUCUGCGUUACUACGUGGGGC  
>P2929  
AGGGAGGUUUCGAGCCCGGAAGGUCCGGCGCCAGAGCUAA  
>P2930  
GAGGAGGAAACCCUCCGAGAAAACAGCAACAAGCUGAGCU  
>P2931  
GUAGAGGACACUGGCAGGAGAGUAGCUGGAGAUGAGGCAGG  
>P2932  
CUGCUAGGAUUGUGAGGUGGAGGCUGUGCGUGCGGCGAGGG  
>P2933  
CCUGAAAGAAACCUGGCGGGAUGGGGCCUCCCGGCAUCCCA  
>P2934  
AGCUUUAUACGUCUACGAAUAUUUACUGCACGUAGGAGCAC  
>P2935  
CCGCGUUCUCCGCCCCACC AUGGCUCGGGGCCCCGGCCUC  
>P2936  
GUAGUUGGUGUUGGUGCAAGACGGGAGCGAGCGGCGGUCGG  
>P2937  
CGGAGGCGAGGGAGCAGGUUAGAGGGACAAAGAGCUUUGCA  
>P2938  
CGAAAGAAGAAGAGAGGAAAAGAACACCGAAGAUUAACCA  
>P2939  
GUUCAAGAUGUCGACCAAGA AUUCCGAGUCAGUGACGGGG  
>P2940  
GCAACAAGCACCCUGCACCAACAGCAUCAUGUCCAUCCUG

>P2941  
UUCCUGAACUCCGCGCUGCGAUCCAUGGGUGACGGACUCAG  
>P2942  
UGUUGGCUCCCGUCCGGCCACUCGGACAAUAAUACACGGG  
>P2943  
UCCGGCCCUCCUGACGCGACACUGCCCCUCUCCGAGAGCUG  
>P2944  
GAGAACGGAGGAGGAACGAAACGCAGAAUUGAGCAGGAUA  
>P2945  
CAAAGAAGAGAAGAUGAAAAAGGAAAGCAGAAGAAGAAGC  
>P2946  
GAACAAAGAAGAAUUGAAGAACAAAAGUUACUACGCAUGCA  
>P2947  
AUAGUUUCUCCCCUUUUCCAAUGACUAAUCCUGCCUUGCU  
>P2948  
GGCGACGGAAAACGGGGUCCAACCCCCGAAAGCGGCUGCCU  
>P2949  
AUAGAAGAGUGACAGCAGCUAGACUAAAUGUUUAACUGCUG  
>P2950  
GACGAGUCGCAGAACCCCGGAUCCGGCGAAGUCGGCGGGCG  
>P2951  
AAAGAGAGAGCGACAGCGAGAGAACCACCGCAGCGACCCCC  
>P2952  
AAAGUGAAGCCACAUGCCAACUUGCAGCAGCGAUUGCAG  
>P2953  
GGAUUGACUCUGGGGUUUGCACUCAGUGCGCGCUUUGGCGG  
>P2954  
CUACUUCCCCUCCUCCCCUACUCCCUGUAUAUUUCCUCG  
>P2955  
UGAGGGAGCUGUUUCCUGGAAGACAAUGACUAAGCAGAAAU  
>P2956  
GAACAAAUACAAUGGUGGAUGUCAUCAGUUAAGGUGGGG  
>P2957  
CGCUCUUUGCACCAGUGGAGAAUAGAGAAAUUCCCGACUU  
>P2958  
GCAGCGACAAAGCCUCCGCCAGAGCGGGAGAAAGAAGAGAC  
>P2959  
CCCUGGAGCGACCCCGGAGGACUAAGCGGGAACGGGACCAG  
>P2960  
CGAAGUCCCGCAGCCAGCGCAACAUGGUCCCAGAGGCGCAG  
>P2961  
CUGUGCCCCAGCUGGGCAAGAGAGGGCACCCGACGCCGACA  
>P2962  
CCCCAAGGCAGGGGCACCGCAGGAGGCCGGCGCGCCCCUG  
>P2963  
AGGAGGGAGGACCGACGCCAACCCAGACCGCCGCGUCGU  
>P2964  
AGGAGGUGCAGAAGGUGGACAGGGUAAAAGAAAGAGACUUU

>P2965  
CCAUCUCCGCCGCUAUUACCACUGAACCCGGACCCCUACC  
>P2966  
UCCUUUAUCCACCCGAAACAUAUCCAGAUCACACCAUCU  
>P2967  
AAUACUUUUUCUCCGAAGGAGAUUAUUUCAAGUGGAAUA  
>P2968  
GGAGUCGUGUUGGUCCUCAGAUCCCCGCGUAGCCGUGCC  
>P2969  
GGAGGACGGCCUGUUUCAUGAGUUCAAACGCUUCGGUGAUG  
>P2970  
GACUGAGGCCUGUGGUGGAGAGGACGUGCCGUGCCGUGG  
>P2971  
GGAGGUGGAGGAGGUGGAGGAGGUGGAGGAGGCGCCGACC  
>P2972  
CAGCUGCCAACUCUUCUCCAGUUUACUCACCCGGCUCUUC  
>P2973  
GGUGCCGUGGCACCCGGGAGACGUGGGGGCCGGCGCUG  
>P2974  
AUGCAUAUGUGGGGCCGGAUAGAAUUGUGGCAGGCGGCGCU  
>P2975  
CAACACCACCGUCUCCAACCACCACCAGUUUGUACUCAGUC  
>P2976  
AGAUCUGACAGACGCCAAGACGUCUGGAGAGGCUACGG  
>P2977  
GUCGGGCCGGCCUCUGCGCGAGUGCCCAGCCACAAGCAGCC  
>P2978  
CUUUUAUUCGGGCCAUCGCGGACGCCGGUCUUAAGAAAGCAG  
>P2979  
GCUCCUGCUGGGGCCUGCCCACGCCAAGGACCUGCCUCUGU  
>P2980  
GGAGAGAGUGGGGCUCCUCUAUCGGGACCCCUCCCAUGU  
>P2981  
GCACGCUUUCAGCUUUCGUAUAUUAUCAGUAAAAAUGAAA  
>P2982  
CAAAGCGUUGAUUUCUUGGCACCCCGCGGGGCGGGCAACUG  
>P2983  
GAGGGGGGUGGGGUGGAAAUAGCGGCUGCUUCUUUCCAAG  
>P2984  
CAUCUUCACAAACUACAGGGAUCCAACACUGGCCCGGAAGG  
>P2985  
UGGGGAGGGGUCCCGAUAGAGGAGCCCCACUCUCUCCUCC  
>P2986  
GGAGGAUGAGGAGAAAGAAGAGAAGAAGAGAAGGAAGAGG  
>P2987  
UGGUGCCCACACCAGGCUGCAGCCGUCGCGUCGCAUAGUC  
>P2988  
GGCAGCCCGCAGUGCUGCGAGAGGCCGUGGAGGCCGUGGU

>P2989  
GACAGACAGAAGAAAAGACAAGAAGCAGCUGCCAAGAGAAG  
>P2990  
GCCAUUUUCACAAGCACAUGAAGAUGAUACUUUAAAUGGC  
>P2991  
CGUCCAGAGUCCUGGCCUGAGCGGGAAUCGCAGUGGCCGA  
>P2992  
UUUUGGAAAUGUACUGCUUCACAGCAAAAACCACGUUCAUG  
>P2993  
UCGCGCCUCCCGCUCCCGGACUCUCCCUUCUUUGUAGCU  
>P2994  
UCUUCGAGGGGAGAAGAGGAACGAGAUGCUGAAGACGAUG  
>P2995  
AACGUUACACCGGAACCGGAACCUUCUGACCGCCUACGG  
>P2996  
CAUGGAUAGAGAAGACAGUGAAGAGGGUCCUGGGUUUCUA  
>P2997  
UGGAGAGAGCGCCUGGGCGCAGAAGGGUUAACGGGCCACCG  
>P2998  
AGCUAGCCCGGAAGCCCACACUGGCGGCCACGGAGCAGAG  
>P2999  
ACAGGGAGUCUUAACUAGAGAGGAAACGGGACUAAACUGG  
>P3000  
GAGUGUUGAGGAUUAUUUCUAGAGUUCAAGGUCAGAGGUC  
>P3001  
UUCUGGGACUCACAGUCGUGAUGUCUUUCAAGAGGGAAGGA  
>P3002  
AUCAGCGCCUCAUCCUCUGGAUGUAACUGGCUAGGAGGUC  
>P3003  
ACUUCUUGUAAGCCUCACGAUGAUCUUGAAGGCUCGAGCA  
>P3004  
CUGGGGGCCGGGCACCCCGGAGACCGCUGGGAACCGGCUU  
>P3005  
CCAUAGUGCUUCCAACACCUCUUGCCACCUUCCUCCUC  
>P3006  
GCUGCUGACUUGAGAGGGGUAGAAUCCUUUCCCCACUUC  
>P3007  
GAAGUAAUGGAAUAAUUUCUAAUUUCGGAGAAGGCAAGUG  
>P3008  
CAGGCUGACUCUCCAGGGUGAACUGACAGGAGAUGAACUUG  
>P3009  
GAACUAAGCUUACCUAAUGAUCUCCUCAUGUCCAUCAUGG  
>P3010  
CAAGCCUGUCCACCAUUCAGAAAUAAGCCUGGGCCUUGGG  
>P3011  
GCCUCAACCUGAUCCACCAACCCUGGCCUCUUGCCAUUC  
>P3012  
GGUUACCCAGCAGUUGCCCCAUCUGCUCUAGGUAGGCAGAA



>P3013  
CCAGGACCCUUGUCACCGGGAGACAGGAGCGGGGAGGAUCU  
>P3014  
GGCGGUUGGUUAGAUGCGUAAGCGGUAGUAUGCGAGCUCAG  
>P3015  
GAGAGGACCCGAGUGUGAACAACUGGGAGUGUGCGUGCGUG  
>P3016  
CUUCCAAUCCGCGCAAUUUAGUGAGAAGAUUGCGCUGCAG  
>P3017  
GCAGUAGCUGGGUGGGCACC AUGGCUGGGAUCACCACCAUC  
>P3018  
UCCCGGCCCGCCGGCCCCGGAGCGGAGCGGAGCGGAGGAUG  
>P3019  
GGCCUUUGAGGCAUUGGCAGAGACCCAGGGUCCUGGCCCC  
>P3020  
CCUCAGGGACCUCAGCAACU AUGGCCUCCUGCCCAGACUCU  
>P3021  
GAGUCACAGAAGUCCUGGGGAGGGAGAGGGACAAGUGGCUU  
>P3022  
GGUGCCCGGAGUCUUAAGACACCGCCAGUCUCUGGCGCCUU  
>P3023  
CGUAAAUGAGCGAGUCCAGAAGCCGCCCGCCUCCAUAACG  
>P3024  
CCUGGUACAGGGUGGAGGAGAUUCUUGUUGAUGUAGUACAGA  
>P3025  
CGACCCGAGCCCCGGAGUGAAUCUCGCACACUUCCCAGCA  
>P3026  
GACUUUAGGGCUCCAUUCUCAUUUUCUGCGGGGCCCCCAGG  
>P3027  
AUCCUGGGGAAGCAGAGAGGACGAGGCAGGCCGGCUGAACG  
>P3028  
AAUUCCAAGCCUUUUACUCAAGGCUGUCUCCCCAUUCCCU  
>P3029  
GCAGCAUGCCUACGGUCCUAACCCUGGGCUUUUGCACCCA  
>P3030  
GAGAGAGGGCAGAGAAGAGGAGGGGUGUCUAGGGGGACUGG  
>P3031  
GAGGUGGGGGCCUCUCUGGAAGCACAUUUGGAGGGAAAGAC  
>P3032  
GGUGGCACCAUGAAGAGGAGAGAUGGGGGUCUUGGAGGAA  
>P3033  
AGCCCUCCUGGGAUGGCUGGAGUGGAAAUGAGGAUGAGGC  
>P3034  
GGGCUCAUCCCAUAGCGGUA AUGGGGGGGCAGAGUGACCUU  
>P3035  
CCCGGCAGAAACUCAUGGCUACGGCUGAUUUCCACCGAACA  
>P3036  
CCACGUGGUGCUGGGCGAGGACAGCGCCCACGCGCGGCUGC

>P3037  
CUGGUCGCCCUCUUUAUUUUUCUCCUCUCAAGCUG  
>P3038  
GAGAGCGGCGCACUGACUCAAGGCAAGGGCUGCAGCUGCAA  
>P3039  
CACCCUUCGGCCCCCAGAACCCGCGCCAUCCCCGGAGC  
>P3040  
GCUCAAGUCGGCCUGCAAGGAGACAUCCCAGCGAAAAGA  
>P3041  
UCAUUAAGAUGUCCAGCAAAGGGAGCAGCACAGAUGGCAG  
>P3042  
CGGUCGGGGCAGUUACAAGCACGGGAAUCGGCGAGGCUCAG  
>P3043  
CGGUGGCGACGUCCAGCCUGAGAACCUCAAGAGAGGGAGGU  
>P3044  
GCACCUCAGAACUCAGGCGUACUGCCCGCCGCCCAGCCCU  
>P3045  
UCUCUGGCCUCUCCCUCUGUAGGACUCUGUCUGGGCCGCUU  
>P3046  
GUGACUCCAUGGUGCCGGCAACCCAGCCGGCUCCCCCAUU  
>P3047  
AUCUCCUGACCUCGUGAUCCACCCGCCUCGGCCUCCCAAAG  
>P3048  
UGACUGAAUGUAGCUUCAGGAGAUCAGGCCAUAGAACGCU  
>P3049  
GUCCCGCGCUCGCUCCGAAUAUAUACCUCAUCCGGGGGGC  
>P3050  
GCGAGAGGACGGAGGAAGGAAGCCUGCAGACAGACGCCUUC  
>P3051  
AUUGAGAGGGUAGGCUGUGGACUCCAUCUCUGCAAGCAAGA  
>P3052  
UGGUUCUCCUCCUGGCAACUCACUCUCGAUUUCCACA  
>P3053  
UCCAUCACACAGACACUUUCAGAUUCUCCCGCAGGCUCCG  
>P3054  
CUGCGGGUCCUGCCUCAGCCAUGAUGAUCCACGGCUUCCAG  
>P3055  
CUGGUGGGGACUGGGCCGCAUGGACAAGCUGAAGAAGGUG  
>P3056  
CCUACAGGGAGAAGGCGUCACUCGCGGUACAAGUGCCUG  
>P3057  
GCCCUUCCGGCCACCCUUUAACCCAGCUUCCCUCCCCC  
>P3058  
CAAGAAAAGAAAAGAACUAGAACGGCAGAAAGAAAAGGA  
>P3059  
AUGAUGUGGGCUAUCGGGAUAUAGUGAACAUCAUCAGU  
>P3060  
UUCUGCUGGCUCUCUGUGACCGCUUCCGGCUCUGCCCU

>P3061  
GUAAAACUGUUAGUAUCAGGAGAGCCCUUCGAGUAUUCUCU  
>P3062  
GCUUCACCAUUAACACAAUGAUGAGAGGUAACAGGAACGCC  
>P3063  
CUAGAAAACAUUGGAAAGUUAGAGAGUUCGAGGGAAGAAU  
>P3064  
CACUGCCUGCGCUCUUGUCC AUGGGUCUGCAGUCGUGUUGA  
>P3065  
CAUAGCACUCAUUCUAUUUCACACAUCAUUUUUAACAAUGC  
>P3066  
UUCAGGUUGCCGAGGAGCCCAGUAGAAGAAAUAUGGAGUU  
>P3067  
UGGUGCGGGGGCAGCUGAGAGCGAGAGGUGGAUCGGGGCG  
>P3068  
CCUCCCACCCACCCACCAGAGCCUUUCUGUGACAGCAGCG  
>P3069  
ACGCCUCCCCAGUGCCGAAACUUCGCCCCUCCGCAGGGUC  
>P3070  
GCCUGGAGCCUGGAAGGGGGAGACGGCCCGAGCGGGAGCGG  
>P3071  
CUGCCUCAUUCACUGACCCC AUUUCUACAGAACUCCUAAA  
>P3072  
UCUCCAGCACGCCUCCUUGAGCACGGUAGCCGUCGCCGCC  
>P3073  
GGGCGCUUAGUCCACCCCCAGAGGAGGCGGAAGAGGAGCC  
>P3074  
GGCGCGAAUUCGGCGGGCAGAGCAGCUUCGGCGCUGGCGGG  
>P3075  
AGCUGUUAGGGGUAGACCUAGCCAAGGAGAAGUGGGAGAC  
>P3076  
GGCAGCGGCCAAGCAAGAAGAAAGACGUGGCAGCAAGCGGG  
>P3077  
GCAGAGAGAGAGACAGAAAGAGAGAGAGAGAGAGAGA  
>P3078  
GAUGGGACCGCUGCUGCCGAACCCCGAGCUGCUGGCUUCUC  
>P3079  
UCGCGCCCUGCGCCCCACCCAGGUUGCGGCCCGCCGGGGAG  
>P3080  
GGUGGCCUGGGGAAGAGAGCACAGAAGCCAGGGAAUGUCA  
>P3081  
GACCUGGCUGGUGACCUUGUAGUCAUCGAUGAUGGCGUUCU  
>P3082  
AACUGGUCUUAACUGACUCCAAAGCUGAGAGCUCCAAAGUC  
>P3083  
GGCCAUGAACUCCGCGCCAAGACCCAGACCUCGUUGGCC  
>P3084  
CUCUGGGCUCCAGCCCGCCAGCCGCGCCAGAACUGUACU

>P3085  
AAGAAGAACUCAGUGGAGAGAAAAUAGGCUAGCUGGAGAG  
>P3086  
GAAAUGAAAUGAUGGAGAUAUCAAGUGUUGGGACUAAUUAU  
>P3087  
GGUCGGUUCUGCAGCGCUGUAUCGUGUCGCCGGCAGGGAGG  
>P3088  
CGAACCAUCUCCUUGAACAGCCACUCUAUUGUAAAGGAC  
>P3089  
AGACCUGGCUCCUGGACAGCAAACUUCUCUCUCCAAUGUC  
>P3090  
CCCCGUCCCCUCCCGCCCUACCCCAGCAAGGCCGGGUUCU  
>P3091  
GCCGGGCGGCGGCGCGCCGAAGGCAUCCACUGAGGAAACA  
>P3092  
CCGCCUCCCGGUCCUUCGCCAGCUUGGCCGCGAUGCCCGCC  
>P3093  
ACGCCGGCGAGCGCCAGACUAGGGUGAAUGGGAAGGACCGC  
>P3094  
GGGAGGGGGCGGAGAGGCCGAGGCGCGGAGCUGGUCCCCAG  
>P3095  
GGUGAGCGUGGGCUCCAGCAUGGGCAGGGGACGGAGGCAA  
>P3096  
CUGCAGCUGAAGCCCGAGGCAGGGUUGGUGUGAUGCCAAGG  
>P3097  
UCUGGGAGGCAUAAUUUAGAAGACUCAUGUGCUGAGCUGGG  
>P3098  
CAGCGAUGACGACGAGGAGGAGAAGGUAGAACCCUUGGUC  
>P3099  
UCUAUCUUUGCCUUGUAGGAAGGAGGAAGAGGAGCGAAGGC  
>P3100  
CUCCAACGUCUCUGCGGCCACACCGGCCCGCGCCCCUCGC  
>P3101  
UGCUGGGGCUGGGGAGCGCAAGGUGCGGGCGGGUUUCCAGG  
>P3102  
GGCGCCGGCGAGGAAGCGGAGGAGGCAGGCGCGGAGGAGG  
>P3103  
GUACUUGGCGCUCGCCACAACCGGUCUCCUCCUUGAAC  
>P3104  
UUGUCCACCCUCAGAGCCCAAGAUGAUGUUUGCAAAGGAGC  
>P3105  
GAAGCUGAGUCCAGCUCGAAGUGCGCGUGGAGGCCGUGG  
>P3106  
GCGGCUCUCCUCCAUUCUGCAUGUGGCUGGUGGGUGCCAGG  
>P3107  
GCCCCUGGCCACCAUCUGGAGCGCUUGCCCACCCGAAGC  
>P3108  
UUCGAUGCACCUGUACUGGCAGGAGGCCGAGGCAGCAGUAG

>P3109  
CCGCGCCUCAAAACCCCCUGACUCCAGCUGCCGACGCAGGC  
>P3110  
GAUGAUGACAACAAUGAGGAAGAGGAGUUUGAGUGCUAUCC  
>P3111  
CUUUGCCCGGAGGGAGCUGCAGAGGGUCCAUCGCCGCCGUC  
>P3112  
GUGGUGAAAUAGUGGGAAGGAUUCAUGUAGGCAUCGGGAAG  
>P3113  
CAAUGCCGAGAAAGCAAUGAAGAGCGUUUCGAAGCAUGCCA  
>P3114  
CUGAGCCGGGCACUAAGCGUACAGCCCGGCCCGCGGCAGCC  
>P3115  
GAAUGUCCUAACGCUCCGCAGUGGCCGCACGGGGCCGGGC  
>P3116  
CUGAAGGUGGAAAAGUUCGCACCCGCAAGAGGGGAAACGG  
>P3117  
GGCGGGCUGGGAGGAUGAGGACGGCUGCCCUGGACUCCGC  
>P3118  
CAGAGGAAUAUGCUCCAACA AAUUUCGGAUAGAGGCGCCGA  
>P3119  
AACAGGUCAUGGCACGUUUAACAAAAGACGACAGGCGGAU  
>P3120  
AAUUUGUAGAAGAAUCAAGAGCUGGCAACACAGCACAAG  
>P3121  
GGCACAUUACAACUUCAAGAAAUUACGGUGGUGCCGUCCG  
>P3122  
ACCGAGUCAGCGCUGUAGCGACGCUAUGCAGAGGCACACGG  
>P3123  
GCCGGGCGGCACUCCGCGGAACCCGCCAGCGGCAGGAGGC  
>P3124  
CUGGAAAGACAAAAGGAAUAGAAGAAAGGGAAAAGUAAGG  
>P3125  
CGUCGGUGACCGUCCACUCCACGGGUUGCUCUCCAGAACC  
>P3126  
CCCCGCCGCCAGACCUUAGCAGGGUCCCCGAUUCAUCCUCU  
>P3127  
AAGAAAGAUAAAGAUAAAGAGAGAGAAAGAAAAAGUGAAAGA  
>P3128  
CAAAAGACGAUAUCAAGCUCACUGCCAAGAAGGAGGUCAGC  
>P3129  
AAAAAGAGCUUUAGUCUCGAAGAGGAAUUACCGAAGUGUC  
>P3130  
GAGAACUGGCAGUGAAGCAC AUGCUCCUUCUUCAUCCUCCA  
>P3131  
GCCCGCGGCCCGUUUCGGGAGGAGGCGGAGGGCGCAAAGC  
>P3132  
CCUCCUCAUUGUCCCCGUCUAUCCCGCACGUGUCCUGGUCG

>P3133  
UCCGGGGCCUGACCCUCGGAACUGCGCCUCGGCGGGCGGUG  
>P3134  
AGAUGUUACUAGAGGAGGAGAUCCCGUCUGGCAAGAGGGCG  
>P3135  
UCUUACUAAAAUCUUCUUC AUGGCCAGGCGACCGGGCUU  
>P3136  
CUGAGGAGGGCGUGAAUAGGAUCGCAGUGCCAAAACCGCCC  
>P3137  
GAAUUCUCUAAUGUUAGAAGAGGAAGAGGUGUGGAUUACCU  
>P3138  
CCGGGCAUCGGUGGCCGCGGAGCCGCUCUCCCACCCUGGGG  
>P3139  
GCCUCUCAGCCCUUCAGCAGAGUGAGCUGCUGCGCAUGCGC  
>P3140  
GGAGUAGGAGAGGCUGGGAGAGCGGGAGGAGAGUCUGCGGG  
>P3141  
AUGAAUGGAAACCAAGAGAAAGGUGAUAAGACUGAUAGAAA  
>P3142  
GUUGGAAAUCUCCCUGAGAGAGCCGUGCGGCUCAGGGGA  
>P3143  
CCUCGCCGCCUCCGGAGGCGAGGGAUUGUUUCCACAAGGG  
>P3144  
GGAGAUGGGCAGCAUUGUUGAGAGAUUGGUAACACUGAGCA  
>P3145  
UCCGUCGUUUGAUGCCCUUAACAGCCAUUACUGAUCAGUC  
>P3146  
CUUCCUUAACUUCUUCUCUAUAUCUUCAUUCUAAAUUUC  
>P3147  
UUGUUCUCAACCUGCAACAGAAAUCCAAGUGGUGGGGU  
>P3148  
UCCCUUGGAGCACCUAGAGGAGGGUGGGACGCGGGGAACUU  
>P3149  
GGAGGAGGAAGAGGAGGAAG AUGACGAGGUGGAGGGGCAG  
>P3150  
UCCCUCUGAGCAGGACUCUCAAGAAGAAAGACAAGCUGCUCU  
>P3151  
CAGAGGGCACCAGCCGCGGGAACCCCCGGGCCUCCUCGCGC  
>P3152  
GAGCGGCUAACCGGGGACCCACCGCGGGAGCCAGCCUAGC  
>P3153  
GCACUAUGGGAAAUCUGCUACAUCGGUCGGUAGAUGGGG  
>P3154  
GGGCGGGGGGCAACAGCAGCAGCUCGGCCGCAUGCAGUCG  
>P3155  
CGGCGGCCGAGCGGCAGCUACAACAACCGGUCGCUCUCC  
>P3156  
GAAAAUCUUCAUAAACUUUAACCCACUCUCGUUUAUCCCA

>P3157  
CUUGUGCUGCAGCGCCACACAGAAAACUGAAACAAAACCC  
>P3158  
GUCCAGUUCAAAGAAGGGAGAGUCGUUUGCCUCGUGUAGC  
>P3159  
UAACCUCCACUGCCUCCACCACCACGGCCUUAAGAAAAAGA  
>P3160  
UGUUAACAUGGCUAAACUGAGUAUCAAGGACUCAUUGAA  
>P3161  
AGCAGAAGAAGCUGAGGAUGAGAAGAUGGUAUGAUUGAAA  
>P3162  
GGAGGCGGCGGUGGCCAGUAUGCCUGGGAAACUCCUCUGG  
>P3163  
GGACGAGGAUGAGCGGCCUGAGGCCGAGGACGGCCCGGGUG  
>P3164  
GACCUGGGACCCCAUCUCAAAUCAGGCACUGCUGGGAAGAA  
>P3165  
CUUCCAGCUCAUCCACCCCACAGCCUCAGGUUUGGCAGC  
>P3166  
CUAUUUAGGGAUAAAACAUUAGGUGCACAAGAGCUGGGG  
>P3167  
UGC GCGUAUGAAACACUGGCUCGCGGCGGCGAGCGGGGCG  
>P3168  
GAGCGGACGUAGAGCAUCGGACGCGGGCGCCGUGGCGCUGG  
>P3169  
GCCCGACCGCGAGCGUGCCAAGCGGCUUCAGCAGCUAGCGG  
>P3170  
GGACCAGGUCCUGCUCACCCAGGAAGAGGCCAGUGGCGAAG  
>P3171  
AGCUCUGCUCUCCAGCGAGGGACGCUUGCCUUCGCGGCUU  
>P3172  
GAGCGCCGCGGCGGCGGCCCCAGGCCUAGCUCUCGUGGCCG  
>P3173  
CAGCUCAAUGCUGGGUGGCUAACGCUCGACGGUGCCCGGCA  
>P3174  
GGCGAACUUGGCACACAGGGAGGAAGGGAAAGGUGUGUGA  
>P3175  
CUCCCCGGCCGCGGAGGUACGCUGAAGGAGCUGCCGAG  
>P3176  
GCGGCAUUGCAGGCUCUGAGAGGAGGGGACCCGGUUCCCGG  
>P3177  
AGACGUGGGCACUGCCCCUGAUGGGGAGGAAGAGGGCUGAG  
>P3178  
GCGGCAGCAAUGCUCGUGUAGAGACGCGGCUUUCGGCAAG  
>P3179  
GGAAGCCGGCGAGGAGGCGGAGGGGAGGAAGAGGAGGAGG  
>P3180  
GGCGGAGGGGGAGGAAGAGGAGGACGACAGCUUCCUCCUGC

>P3181  
GAGCCGGGCAUGGCUGAAAGAGGGCGGUGGGGACGAGCCCC  
>P3182  
CUGCGGAAAGUGAGCGCCCGAGCCCGACGGGAAGGUGUAGU  
>P3183  
CAGCGUGGAGGAGGCUGAGGAGGCUGAGCCAGAUGAAGAGU  
>P3184  
CACCUCAUUCUUGCUCAGGAACCCGUUGUCCUGCAGGGCCA  
>P3185  
GCCCCUCAUGGGCCUCCAUAGGCCCUCCGUUCUUAUAUAC  
>P3186  
UGAGCCAGCCUCCAUGUUUUUAACCUGGAAAGAUAGAUA  
>P3187  
UGAGGGGACAGGGGUACUGGACUCCCCGGCUCAGCCUGCGA  
>P3188  
CGGGAAGCUAUAACUGCGCAACUGGGAUUCAUCCAGGCGG  
>P3189  
AAAAGGAUGCAGAUGACUAUAGAAAUGAGGACGACGAGGAG  
>P3190  
CUUCCAGCCGCCCCUCGGCAACUGUGUCAGCAUGACCCGG  
>P3191  
AAGAAUAUGACGAGAAGACGAGUGAACUACUUGGUAAGUGA  
>P3192  
CGCCAGGCCGGGAAGAGCACAGGGACGAGGGGGUCAGGCUU  
>P3193  
UACGGGUCCCCGGCCCCGGUCACUAUGGACAGUUUUUUCUUC  
>P3194  
GUUCUUUUCUCUGUCCAUAACCCAAGGUCUCCAUA AAAU  
>P3195  
AUGUGACUUUCUGUUCACAGAUUCUCUAACCAUGGCACAGG  
>P3196  
GUGUCUCAUCCUGCAGCAUAGCUCCUCCAUUUCCAGGUCC  
>P3197  
CUACCCGGAAGAGUUCUAGCAGUGAGGAUUCUCCAGUGAC  
>P3198  
CCCGGUUCAGGACGUGUGGGAGCAGCACGUCUCCCAGGGC  
>P3199  
GAAGGAAUCGUUAGGGGGCCAGGGAGAUGUGACUGAGGCUG  
>P3200  
GGAGAAGCAACAGCCCCAGAAGCCACAGGCGCAGAAGCGGG  
>P3201  
GAACGUGCGCGGCUCGCUACAAGUCAACCUAACUCGGUGG  
>P3202  
AAACAAAACAAACAGAGCGAGAAGGGCCAGAGACUCUCCG  
>P3203  
UCUACAUCCAUUUCCCUUAUUUCGCUUGCACUGAUUAAA  
>P3204  
AAGCACUAUGCCCAUUUCUGAUCAUUAUCCAACUGGUAA



>P3205  
UAUCCAGCCUCUAGUCUCCGAGAUGACCUUUCAGCCUCUC  
>P3206  
GAAGUCAGAUUAUAAAGAGCAAAGGGGGGGGAAGCCGAAGA  
>P3207  
UAUCACGUACAGCAAUGAACACUUCACGCCGGGAAACCCAC  
>P3208  
AGCCGCCGAGCCGCCCGCGCACACCUGAAGCGGCCGGGCCA  
>P3209  
UCGCGCAGCCCCGGACCGCGAGGGGAGCCUCCAGCGCAGCG  
>P3210  
AUUCAGAAGGCACCUGGAGAAAGGACCUGAAGCAGAUUCU  
>P3211  
AAGAACGGAAAAGGCAGCGUAAGAAGAACGCAGGAUAACA  
>P3212  
UGCGGCCACCGUCCGAUACACGUCUCCGGGUACCCGGUAC  
>P3213  
UGGCCGAGUAUGAGAAGACC AUCGCUCAGAUGAUAGGUAGG  
>P3214  
CCCUCAGAAGCAACGUUCCACUACUCGCCACUCGCUGCGG  
>P3215  
CAGCGCGACGAGGAAGAGGAAAAGAAGUCGAAAUGAGGA  
>P3216  
CUCCUCAAACUGCCCGGCUGAGCCGACCUCUCCACGGCCG  
>P3217  
CAGCCUGCCACCUCACCUCAGAGGAGACCAUGGGCCUCG  
>P3218  
GGGUGGGGACGAGGGUGUGGAGGGGCAGGAAGCACGGCGGG  
>P3219  
UUCGUUCUCGAGCCAGCAGAACGGGUUGAACGUGUCGACAA  
>P3220  
GCUGGAUGCCAUCCACCCACACCUUCAGCUCCAUGGCCGCC  
>P3221  
GAGAGGGUGCCAGCGGCCGAGCUGAAGUUGGGCCGAGAGC  
>P3222  
GGCCCGGAGCCAGGGCCGGAUGGACACCCACAGGUCGGCC  
>P3223  
GUCAAGCCACUGCAGCCAGCAACUCGGAGGAGAAGACCCCG  
>P3224  
AUGCCCGGGGAGCUGUCGGGAGUGGCGGGAAUCGGGGCCAU  
>P3225  
GGGACAGGCACUGGCCUCAGACCGGGGCCACACUGAGGUCU  
>P3226  
CACCCGUGAAGCGUCAGAGGAUGGAGUCCGCGCUGGACCAG  
>P3227  
CGCGUGAGUAAAUGCCAGGAACAUGAGACUCGAACGUGGCA  
>P3228  
ACCCAACCCCCUGGGUCCCACCCUCCUCAAGGCCUCCUC

>P3229  
GGUUCUGUUUAGAGUCAGUAUGUUAGGGCGCAGUGGGCA  
>P3230  
AGGUUGGACCCUACUGUGACACACCUACCAUGCGGACACUC  
>P3231  
GGAGCGGCCUCGGCUGGCGGACCCGGGCGGAGGAGCGCGGG  
>P3232  
ACGCUGGACGAGUCGGACCGAGGCUAGGACGUGGCCGGCGC  
>P3233  
GACGAUGGUGAAGUACACGUAUCUUGCCCGUGCGCUCCACGC  
>P3234  
GAAGGUGACGAGGAGGGAGAAGACGAGGAUGAUGCGGAAAU  
>P3235  
GGCGGCGCAGCCCCAAAGCGAGCGAAGCUAGGGUCGCCGCC  
>P3236  
GGAGAAGAGGAAGAAGAAAGAGGAGGCGGCCCGGAGGAAAC  
>P3237  
UCCUCCUGGACCUGCUCCACAUAGGUGGUCCUCUCCGCAC  
>P3238  
AGCCCGAGUCGCGGCGCUCCAGGAAGGGGGCGGAGUCUCU  
>P3239  
GGGUGAUGGGGCUGUGGGCAAGACGUGCCUGCUCAUCUGCU  
>P3240  
CCCUCCUUGGCACCAGACGAACCUUCUUGGCCCCUCAGG  
>P3241  
UGAGGCUGAGGACCAGACAAAGAGCAGAAGGCAGAGGAAA  
>P3242  
UGCCUUCAGCCUCCAUUGUAGCCGUCCUUUACAGCCCGGC  
>P3243  
GGGUGAGGAGGUCGCGCCGGAAGUGGCUCUAGCCGUGGCGC  
>P3244  
CGAUA AUGGUGUUGGGGUCCAU CGCAGCGCGGACUCGGUCA  
>P3245  
GGAGAAGCAGGAGUUGGAGAUCAGCGUGUCCUGAAGGAAC  
>P3246  
UGUUUGGAUUUUAGCGUUCUAGAAGGGAGGAGUUUGAU  
>P3247  
GGGGGAGGGAAGGGGGAGGAAGGAGUCGGGGACGGCCUCAA  
>P3248  
AGAGCAUCACCCUGUCCCCGAUCCUUCUUCCUCUCUGUU  
>P3249  
UGAAGAUGGACAUUCUUUAAUCCGCUGUUGCUAGAUUUCU  
>P3250  
UUUAGGAUUGUAGAGGAGGAAGAGAAGUUUAAGAAGCAAUG  
>P3251  
GGGAGCACGGUCUACAGCAAACACUGGCUCUUCGGCGUCCU  
>P3252  
GCCAUGACGGCCGCCUGGCGACUCCCUUCCCCGCAGGCAGA

>P3253  
AAAGGAACUGGAGAAAGAAUACUUGCAAGAAAAAGCAAAG  
>P3254  
CCCUUCCCGCUGCUCCAUGGACGCGCAGAGGCAGCCCCGU  
>P3255  
CAAAGGAGUGGAGAAGUACCACCACAGAAACUUCAGGCUUU  
>P3256  
GGUCUUCCUCAGUGACAGACAUUGUUGAUUAUCUUGAUUCC  
>P3257  
UGUGGCCUGUGUGGACUCGCAUCUUGCCCGAAGCCGGGCGG  
>P3258  
UUGGCAUCUGCUCAACCGCCAUCAUCCAUGGAACCAGAAGU  
>P3259  
GUGCCCGGGCCUGCACCAUGAGCGUCCCGGCCUUCAUCGAC  
>P3260  
AUGGGAAGCUAGAAAAGAAAAAUUA AACUAAAAACCACCCC  
>P3261  
GGGAGCACGGAACAACUCCGAAAGAGAAGGCACAGCUGACU  
>P3262  
GCCGCCGCCGUUCAAGCCGAGCCCAGGCACCCGGGUCCCG  
>P3263  
CAGUCACCAUCUGGCCGAAUACGUCCACGGCUCCAGGCCU  
>P3264  
ACUAGGGAAUGGGAGGUGAGAGUGGCUGACACCGACCCAAC  
>P3265  
UGUACUGGGUCGGCGCGGGCACCGUGGCCUACCUAGCCUG  
>P3266  
GCGUCACCCGCUCGUGCCUCAGUCGGCGUCGGACUGCACAG  
>P3267  
UCUGGCUGUGCUUCUUCAUCAGAGGCGGGGGCUGCUUGGCC  
>P3268  
CGUGCCGGGCCGGGCAGUGCAGGGCAGGGCAGGGCAGGGCA  
>P3269  
GGCGGAGGAGCUGCUCUUGGAGGGGAAGAAGGCGCUGCAAC  
>P3270  
UUUUAUCUCCCUGUGCAGGGACUGGGCGACCCUCCGUUCUG  
>P3271  
AAGGCCGAGGCACUUUCGGAAUUCACAGUCUGCAGCAUUG  
>P3272  
AGCUGUUGGGCCCUGAGAGGAUCCAUCUCAGCCUAGCACCG  
>P3273  
UGGGCAUGACGGGCUGGAGGACAAUGCCCUGGUGGGCUGGA  
>P3274  
UGGUUUAAAUUCUGCACGGGAGGACCUUCUGAGUUUACCUG  
>P3275  
AAACCCCAAAGCCACGGAGAAAUUCAGGGAAGGUAAAAGAA  
>P3276  
GCCCCGGAGCCUGGCCCCGC AUCUCCGCGGCCGCCGCCUCC

>P3277  
CGCCGGGGCGAAGGAGCUGGAGGCGCAGGCGGCGGGGCG  
>P3278  
CCCAGAAUAAGGAGGAGCUGACCCCGGGGGCCCCCAGCAU  
>P3279  
GGUCCCCCGCUGCUGCCGGGACUGCUCGCGGGCAGCUGGG  
>P3280  
AGGAUAGCAGUGGCCUGAGAAGGUGAGAGCGGGCCGAGGU  
>P3281  
GCUGCUGCUUCUGUCAUCUGAGGGCUGUGAGGUGGCUGUCA  
>P3282  
AGGGAGUCGCGGGCCUUUUGAGGGAGGAGGCAGAGCGCGCC  
>P3283  
CCCGCGGUCCCCGGCUCCCCGACGCCGCCAUGCUGCACGCA  
>P3284  
ACACGGAGAUUGCCAACAGCACACCCAACCCGAAGCCUGCA  
>P3285  
UCCGAUCCUUGGAGAUGGGACCGGCUCGCGCCGUGGAC  
>P3286  
AAAAGGGAAAAAAGAAAGAAAGCAGCAGCAUGAUCCUGACA  
>P3287  
UGCUGGCCACUCGAAGCUCCAGGUCACCAUGCCUGGGAUAA  
>P3288  
AAGGGACAUGAGGCAGCCAAAGAAUGGUCUCAGGGUGAGGC  
>P3289  
CCAGCUUCCCCUCCAGAUUCAACCUCCUGCUUCUCCCCA  
>P3290  
AUAUCAUACUUGCAGAAAGAACUCUCUUCACAGGUCUAAA  
>P3291  
GCCUCGGAUUCCUGCGCCCAAGCCAAGGUCCGGCGCCCACG  
>P3292  
GGGACUGGUGUGUGACGAGAGGAGGGCGGGAAGGGUCAG  
>P3293  
UUCUGACGAGCCUCUGUUGACUCUGGAUCUCCACUGAGU  
>P3294  
GAAAUGGCACCCUUCUGACAUUCUGAGGCAGCUGGACUGG  
>P3295  
CGUGAGUGGGCGCCGCCGCCACCGCCCCGCGCCGUCGUC  
>P3296  
CUCCCCUCCACAACAGUCCGAGGUUAUGCGUCUCAAUGAUC  
>P3297  
GAGCCUGGGCUCUAGAAAAACUAGCCAGAAGGUGGGGCAC  
>P3298  
AGCCAGGCUGCUGCAGGAACAGUUCGCGGGUCCUAAAGCC  
>P3299  
CGCGCCGAAGCCUGCGCGCCAGUCCUCCGGCCACUGCUAUC  
>P3300  
AGGGGAAGAGCCAGUCAGAAAGAAAAGAGGCAGACCUAUGA

>P3301  
GUUGCCGCCUCCCUGCCGGCAAGUGUGUGAAGAAGAAGCUG  
>P3302  
CUGCUGCGGGUCCUCGUGGCACCCGCCAAGUGUCCGGGCCG  
>P3303  
GCGGGGCGGGGCCUGGGUCCACCGGGGUUCUGAGGGGAGAC  
>P3304  
CGCCCGCCUCCGCACCAGGACACCUUGCCGUAGGCUGUG  
>P3305  
UGGAACCAAGACACAAUGGAACAGAAGACAGUGAUUCCAGG  
>P3306  
UGGAGGACGCUGACUUCGACACAAGCCUAUGGUGCUCUC  
>P3307  
AGCGGCAGACCCGCUCUUUCACACAGUUUGACCAUGGCCAC  
>P3308  
AGGGCGGUAGCGAUGGCUCGAGGCGCGGAAGGGCAGGGACC  
>P3309  
GAGAAUACUUUUUUUAAAAAUGAAGGGGUGGCUCCCAAA  
>P3310  
GGUCCGGGACUUUCCGUUCGAGCUCAUCCGGAGCCCCAG  
>P3311  
UGGGGUUCAGGAGUUUUGCAGACAAGAACUACGAUAGCAG  
>P3312  
CUAGAUGUAUGCCCCACCUGACUCCAUGAGGCUCCUCAGCU  
>P3313  
GAUCACGGGGCCCCAAACACAGGGGGCACUAACGAGAGGAG  
>P3314  
GGAUGCCUGGCUGGCCAAGUACCCACCAUCCAAGUUACCC  
>P3315  
ACGCGGCGAGAGAGGCCCCGAGAUGCCGAGCAAGAAGAAGA  
>P3316  
GAGUAGAGGCGAAGGGCAGGAGGGUGUCGGGGGCUGCAG  
>P3317  
GGCUGCAGUGUCGUCCAGCCAGGGGUCAUCCUCUCCUAGGG  
>P3318  
GCUCCGCCUCGUCCUCCUCCAGCACCUGCGGGGACCCCGGC  
>P3319  
GCUUCGCCGGCCUCAGGUGCACCAGAGGAGCCAGCAGGGC  
>P3320  
GCCUGGCCUCCCCAGACCCCAGAGCCAAGAACACUAAGCAC  
>P3321  
GAGAGCCAUGCAGAUGUCCUACGCCAUCCGGUGCGCCUUCU  
>P3322  
CUGCACCGGAAUCUGGGGAGACCCGCCCCCGCCCCACCGG  
>P3323  
ACCACCCCUGCACGGUGCCAGGCCCCCCCAGGAUGGCCAC  
>P3324  
GCAACGUCGACGGGGCGGAUACGACUCCGGAGGAGCUGGCA

>P3325  
CAGAGCGGUGCCCAUGGCCAGCUCCAUGGAGCAUGGCAAG  
>P3326  
GGUGCAGGGGAGGUGGAGAGAACCU CGAGGGCCGUGGAGGA  
>P3327  
UCGGAGCGGGUGGCCAAGCUAGAGCAGAGCUAUGAGGCACU  
>P3328  
GAGGCGGCGGCACUGACAGGACGUGGGCUGUGGGGCUGGCC  
>P3329  
CUGAGCCCUCACACAUGCCCACGCUCCCCUGACACUGAAGA  
>P3330  
CCACUCCUCCUGCCUCCUCACACCU CAGAGACCUAGCUCG  
>P3331  
GCGGCCUGGCAAGAAUGUACAGCUGACAGAGAACGAGAUC  
>P3332  
CGCCAUGGCGGCCGUGUUUGAUUUGGAUUUGGAGACGGAGG  
>P3333  
ACCCCCACAACAAGAGUAGCAGCGAGGUCCCCAUGAGU  
>P3334  
CGCAGCCCCCGCCAUCGGGUAGAGCGGCGGCUCGCCUCCA  
>P3335  
GGCCCGUCCGGCCGCGGACACAUGGAGGCAGCGCCGCC  
>P3336  
CCUUGGAAAACUGGAAGUCCACUGCGGCCGCAUCCUCCAGG  
>P3337  
GCCCCAGGCCGCCAGAGCCCACCCGACCCGGCCCGACGCC  
>P3338  
ACAGCCUCCCCAGCUGCCCAGGAAGAGCCCCAGCCAUGGA  
>P3339  
CGAGGACAGAGGGCGCACGAGGGGCCGGGCCAGCCCCGG  
>P3340  
GGAGCAAAGAUGGGGUGCCAAGACGGUGCAGGGCUCCGGGC  
>P3341  
AUUUUUGUGUCCUUGCAGGACUUUAGCCGGUUGAGAAGGA  
>P3342  
CCGUGGCCAUGAAGCUAUGC AUGCUGAAAUGGUCCUCAUC  
>P3343  
UCCUCCUCGGCGCGGCCUGAGCGCCCGGCCCGACCCCGGC  
>P3344  
CAACGAACAGGAUCAGGACCAGUGGAUGAUCUAGGUAGACA  
>P3345  
ACACCCCUUCUGCCAAGGGAAGCCCUUCAGGAAGGACCCC  
>P3346  
GGAUGGCGCGGGGACCGGAGCCUCCUCCUCAGCGACUCG  
>P3347  
CGGAGUUGAGCUGGUGAAGAAGAGCUCGGGCUCAUCAUGAA  
>P3348  
GCUUCGCCUACUGUUUGACUACGUGCGUGCAGCCUCCCCUC

>P3349  
UGCGCCACAGCCGCCUCGGCACGCUCACCCCGGCGGCCCGG  
>P3350  
UGGAUUUAGAAAACCGUUCUACAGCCAAUGUUCUAGAAGAG  
>P3351  
CAGGGAAGGUGGAUUCUAGGAAAAGGGAGUGCCUGAGGUAG  
>P3352  
GAGCAGCUGUGACUGUGGCCACUAUCUCCCUAACUCUCUC  
>P3353  
CGUCGCCGGAGAGAAGCAGCAGGAGGGCGGCGAGCAGCAAG  
>P3354  
CUCGGGCGGCGGCGUCCUGGAGACCCGCGAGAGAUGGAAGC  
>P3355  
UCCGAUGCAGCAGGCUCCGAGAUAUCAUACAGACGCCAUUAC  
>P3356  
GCAGCACAGGGAAAGGCUGAAGCAGUCUUCGCGGCUACAGG  
>P3357  
AGCCUCGCUCGCCUGGGUCAGGGGGUGCGGUCGGGGGAG  
>P3358  
UCUCCUUGUCGGCGCCGCUGAUUCCCGGCUCUGCGGAGGCC  
>P3359  
AGAAAGGCGUAAAGAACUUAAGCGACUUCGGGGUGAGGAUA  
>P3360  
UUUGCCUUAUUUUUUUCCUAUAUUCUUCUUGUCAAAUUU  
>P3361  
GAAAAGGAAAAGGAAAGAAUAGAACGUGAAAAGGAAGAGCU  
>P3362  
UUUUGUUACCUUCUUUAAAAAUUCUCCACUUCAAUGAAUUC  
>P3363  
AAUGUAGCCCCAUGGGCGGGACUCGAGGCUCGGUGGACGGC  
>P3364  
CCACUCUGUAUCAUUGUAGA AAAAGAGGCAGAUUAUCAGC  
>P3365  
AGCCGAUGAAGCGGAGUUGCAGCGCCUGGUGGCCGCCGAGC  
>P3366  
GCCAUGGCCUCGUUCGUGACAGAAGUUUUGGCACACUCCGG  
>P3367  
GGAGGAAAGAGAAGGAGGGCAGUGCUCAGUGGUACAGAAG  
>P3368  
CCCGCAACAGCCUGGAGCCCAGGGAGCCGCCUAGCAUCACC  
>P3369  
AGUCCGGUCGCAAGCGUCGCAAAAAGCGGCCGAAGCCUGGC  
>P3370  
CCUUCUGCGAGCCCUGAGGAAGCCUUGUGAGUGCAUUGGC  
>P3371  
CCGUCACCCUCGCCAGUCAUAUUGCGUUCCACACACCC  
>P3372  
GGUGUCUGCCCCAGGCCGAUAUGGAGCGGGCACUGCUGCA

>P3373  
AGCUUGUUAGAGGGCUUUUUAAAAUAAAAGUUGAUUCCG  
>P3374  
CCUUCCCAGAACCCCCUGUCACUGAUGAUGACCCAGAUGUC  
>P3375  
ACAGAAGAAGGUCUGGCGGCACAGAGGGCAGCGCUGCGCCG  
>P3376  
CAGUUGGACAGCUACGCGCCACGGGCUGAGGCUGAGAAAAC  
>P3377  
GUGGAGGAGGGAGCAGAAAAACCCAACUCAGCAGAUCUGG  
>P3378  
CUCCAGCCCCAGAGGGAGAGAGAAGCAGAAGCCCGCCAGG  
>P3379  
GCAUGUUCAGGAGCACAAGAUCAUAGCACCGUGACAGUG  
>P3380  
UCCACCCACUCCCGACCGAACAGCGCCCGGAUCCGAG  
>P3381  
CACCUGGCCGGCUUCCUAAACGAUCCGCGGGGCUCCUCA  
>P3382  
GAUUCUGCAGUGGUGGGCAAGGACAGUCCGGUGAGGAAG  
>P3383  
GGCAGUGCCCUUGUGGAAGACUGGGACUUGGUGCAAACC  
>P3384  
CCUUGGAGAAAAUGGUGAAGAAGUCGAGCAUGGCGGCAGCG  
>P3385  
GUCCGGCGCGGGGAAAGAAGGCAGCGGAAUUUGAGAU  
>P3386  
GAAGAAACAAUGGAUCCUAGACCAUAUGCUGACAGAUC  
>P3387  
GGAAAGUGCGUGCGCUUAUAUAUGGUGGCUGCGGCGGCAA  
>P3388  
CCUAGGCGCGGCGGCCGAGAUAGGGGCCCGAGCCUCCC  
>P3389  
CCGAGUCUAAGAUCAGCGGACACCAGGGCUGCAGGCCGCU  
>P3390  
GGACCCGAGACCGCCGGGCAGGCAGCCGAGGCGCGCCCCG  
>P3391  
CACGGGUGAACGGGGCAGGAGAGGUGGUCGGCUGGAAGACG  
>P3392  
GAACGCAACUGAAAAACAAAAGUCAACCAAGGAGCGGCGC  
>P3393  
ACGGCCGCGGCGGCGGACAGCGCGGAAGUCGCGCGGGAC  
>P3394  
GAAAUGAGAAGAAUGACAAAGAUAGAAGAUAGCUGAGUU  
>P3395  
CCAGGGCAUGGCCAACAUAGAGCCUCAACCUCAGCGGCU  
>P3396  
GGGCUUCCUCGGUGGCGGGCAUGGAGGCUUCGCGCUGCCGG



>P3397  
AGAGUUGGCGCUCGGGGCGGACUCCUUGGAACUGGCUUAGC  
>P3398  
GAAGCGAGCCAUGUUCCCGGAGCCGCGUCCCGUCGGUGGCC  
>P3399  
CAACCCUCAACUGUCACCCCAGGCACUUGGGACGUCCUGG  
>P3400  
GCGGUGGCGGCGGCUGCCCGAGCCAGAGCCUGGGACGGGA  
>P3401  
UGCUGCCCCUGCUGGGGAGAUGGAGCAGGAUAUCCUUGCA  
>P3402  
ACGAAGGAGAAGCGGGGGCCAGGCCGAAAGGCCCGGAAGCA  
>P3403  
AAAAGGCAGAGGUGAAGGAGAGAACAGAGGAACCUAUGGAG  
>P3404  
GAGGAGGCGCUGCUGUCAGUAUUACCGACGAUCCGGGUCCC  
>P3405  
UGGUGGGGGACCCUGGCUCCACACAGCCUGGGAUGGGAGAG  
>P3406  
CUGCCACCCAAGCGGCCCCGACUAGGGGCAGGAAACAAGAU  
>P3407  
UGUGUGUGAAGCCAGACGUCAGCGUCUACCGGAUUCGCCC  
>P3408  
CAGCAGCAGCAACAACAGCAACAGCAGCAACAGCAGCAGCC  
>P3409  
CCGAGGACUAAAAGGAGAAGAGGAAGUUGUGGAAGAGGCG  
>P3410  
CCCAGACUCCAGCUGCUCCAGCCGUCGCGCCUCCGGGCCU  
>P3411  
GCAGUGCUGUGUGGCAGCAGAGGUCCUAGGACGAGGAGCA  
>P3412  
GAGCGACGGGACGGGACGCGAGCGGGAGCGCAGCCGCCUC  
>P3413  
CUCUCAAAAAACAAAACCGAACAAAACAAAGCGCCCCUAC  
>P3414  
CCUGGCCCGCAGCCGGUGACACGGCGCGCGGAACAUCCGUG  
>P3415  
CGACCGAAGCGUCCAGCCGAUUGUGGAAGAGGAGGAAACU  
>P3416  
UGCGGUCACAUACUCCAGAAGAGCGGACCAGGGCUGCUGC  
>P3417  
GGCGACUCCCGGCCUCUUUCACUUCGUAAAGGCCUUCAACU  
>P3418  
CGGUGAGGCCGAGGAGGAGAGCAGCAAGCCUGUCCCGCC  
>P3419  
ACGAGGAGGAGGAAGAUGAGAGCAGCAGCAGCGGCGGGGU  
>P3420  
AUCCGAGAGUCGGAGAUCGGAGAGUCGGACACAGGACAGUC

>P3421  
UAAAAGUUUUUUCCGAUUCAGUCGCCUCAUCUUCAGGAAA  
>P3422  
UCAUCUUCACCUCUCCAUAUUUUGACUGCAUUGCUUGAGC  
>P3423  
GCUUGUUUAUGACAGGAAUUAGCGCCUCCAUGACUCUGAAA  
>P3424  
UCGGAAGAGAAAACAAUGAAUUAGAAGUGGUAAGUAUGAA  
>P3425  
GAGUAAGAAUGGGGAUGGCAAGGGCAGAGUAAGAGAAAAG  
>P3426  
CGACUCUGGCCUCCGGGAGACCCCGUAAAUGCAGCCGUCC  
>P3427  
CGUUCUCUCGGAAUUCUUCUAUUAUCAUAUCGUCCCUCAGA  
>P3428  
AAAGACAGUUUGAGAGAGAAAGUGGGCCAGGGGGCCAAUG  
>P3429  
CAGAACGGCGCGGCUCUCCCAGGGGCCGAUCGGGGACCGC  
>P3430  
CUGCAGACUGGGAUACCAGAAAGACGUUCAAGUCUCGCC  
>P3431  
UUCGUCCGCUUUGUGGUGUUACAGGGUCUCUAGGACACUGA  
>P3432  
UUCAGCAAUAAAGCAAUCGAUUACAACUACAAGUGAAAC  
>P3433  
GUAUAUUAUGCAGAGCAUUCAGAGCAAUACUCUCUCUCCG  
>P3434  
AGCGCUGGGGACAGGAUGGGAUCAUGAAUGUACAGCUGG  
>P3435  
UACCCCUUCCUCUCCAUGCAAGUGUGGCCAGGGCCCUGGGU  
>P3436  
GGGAUGGUGGCAGCCAUAGGAGGGCAGGGUAGGGUAGGGCC  
>P3437  
GUCAGGAGAAAAGCGGAGGAAGCUGGGUAGGCCUGAGGGG  
>P3438  
CCGGUGUUAGAAGCGCUGGUAGGCCUUGGAGAGGCGGGUUA  
>P3439  
GCCAGAAGCGCUCGCUCCACAGCCAGCCCCACAGCAAGCUU  
>P3440  
UGCCAGGUUGUUUUUCCCACAUUCCCAUUCUUCUAGAAGC  
>P3441  
CCGGGUGGAGGGGCAAGGCGAGUGUGUGUCCUUAUCCUAGC  
>P3442  
CCCAGGAGGCUGCACAGGGUAGGUUGGCUGUGUUGGAUAUU  
>P3443  
GAAGGAGGAGGCUCCGGCCGACUCCGCCAUAGUAACCACCG  
>P3444  
CCACUGCCCUGCCCAGCUUCAGCACCUUCAUGGACGGCUAC

>P3445  
CCAGCCAGAGCCGCCUCAGAGCUCACCUACACCUUCUUUC  
>P3446  
AAAGGAGGAGCUGGAGACAGAUUGUAGGACCGAGCGCGGGC  
>P3447  
AAGGAGGCGAAGAGCUGGCAAGAGGAGCAGAGUGCUCAGGC  
>P3448  
GCAGAAGAGUAUUUAAUGUUAGGAAAGAGAAGAACCGCGC  
>P3449  
GGCUCGCGUACGAGUUCGGAGUUACAUGCGAGGGCAUGU  
>P3450  
UCUCUGCCUCUCUCUCUCCCACUCUCUUUCUCGUCUCCCCU  
>P3451  
AUACGGAGGGAGGGACCCCAAUAUAGAAAUUCUAACCAC  
>P3452  
CCAGCUGCGGGGCAAGAUGGAGGCGCUGAUUUUGGUAGGAG  
>P3453  
GUGAUAGAGACAGAGGAACAAGAGAGCAGCAGUGAGAAGG  
>P3454  
UUGCUCGUGGUUUGGAGACCAGGGAAUAAAGCAAGAUCUU  
>P3455  
ACACAGCGAAGUAAACCCCAACACCCGAGUGAUGAAUAGCC  
>P3456  
AGGCCUCUCCAAGACAGCCAACGUAACCUGAAGCGAAAGG  
>P3457  
GACAAGGAGGGGAACGGCAAAGUCAUGGGAGCAGAGCUCAG  
>P3458  
UAGGAGGAGCGGGGAGGUUAUACUGAUGGAGUCAGCUAGA  
>P3459  
AGAAGGCGACAGUGAGAAGGAGUCCGAGAAGAGUGAUGGAG  
>P3460  
UGGGUAGGCUGAGAAAGAAAAGGAAAGACAAAGCAGGAAA  
>P3461  
UCGAAACACUGAGAAGGCUAAGACUAAGGAAGUCCCCAAGG  
>P3462  
ACUCGCCCCUGGGCCUCCGGACAAAUGGGGUCUGCGGUUG  
>P3463  
GAGAGCAGGGGGAGGGGAGCACCAUCUUGCAACACAUCAGC  
>P3464  
AAGCGGUGCCCACUCACUCCAGAGGACCUUUCUCUCUUGGG  
>P3465  
CACCACCACCACAAAAGAAGAAUAAGAUAAAGCACACAC  
>P3466  
CCGGGCCUACAGUGCUGAUGAGCACCUCUGCUCUGCCCCGG  
>P3467  
GUGCCUGCUCUCUAGCUUGGAGAGGGUCUGGGAGUGAAGGA  
>P3468  
UAGGCAGCAUAGGAUUGACAUGAUGUGUCCACACUUGU

>P3469  
AGCCUCUCCCCUACCCGAACACCGGCCCCGGCUCCACCGAG  
>P3470  
UCACCUCCCUCUCCCCAACGAGGCAUGGAGACCCAGCUCA  
>P3471  
UCACUCCAACCCCAUGGCGGACCACACGCUGCGCUAGUGAG  
>P3472  
GCGGGGGGAGUGGAGUCCC AACUUUUUUCGGCCUUUGCC  
>P3473  
GAGCAGCAACAGCACCGGUCAGGGGGCCGCGGCAACAAGAC  
>P3474  
CAGGCUUAAAAGUAUUCUCAACUAGACGGUGAUGUUUUA  
>P3475  
GGAGAAAGAGGAGGAGGACGCAAUGAAGAGGAAGGGGACA  
>P3476  
AGAAGGACUUGGGAUUCGGAGCAGUCGCCCCUAUCGCUGC  
>P3477  
AGCCCGCCGUCGCGCUCAUAUACAAUAGCGUCAGCACGU  
>P3478  
GGCAUCCUCGGGGCCGAGGAGGAAGAGGAGGCAGCGGCC  
>P3479  
UCGCACUGCUUGUUGGGCUCAUCAUGAAGCGCUUGGGCUCC  
>P3480  
CUAGUCAUGGGCCAAAGGUCAGAUACUUCUCUGGGAAAUG  
>P3481  
CCUGAAAAAACCCGUAGAUAGCCUCGGAGACCGCCGUGGC  
>P3482  
GCUGCCUCUACGGCUGAGGAGCAGCCAAGAAAAAAGACG  
>P3483  
CCGGAAGAAGUCGGGGCCCAAGGGAGCCCCUGCUGCGGAGC  
>P3484  
CCAGAGGGCAGUGCGGAAGGAGGAGGAGUGCAUCAGCAGGC  
>P3485  
ACUCUCUCACCCGGUCCUAGAGUAGUGUCCAAUGUCCCCGA  
>P3486  
GCUUCUAAGAUCCEAUUGGAAGUCCCAAAGGGCUGGAGAGC  
>P3487  
GUGAGCAGCAUGGACGUGCUAGCGGAGGAGUUUGGGAACCU  
>P3488  
UCUCUCCGGCCAGCCUCCCCACAGUCCGCAGUCCCCGAGGC  
>P3489  
GGGCAGCGGCCCCCGGGGUGAGGGGGCCGAGCGGACGGGCA  
>P3490  
GAAGAGGCUGAGCCCGGCCAAGGGAGCAGAGGGCUGGGACU  
>P3491  
ACGGGUAACCGCACGCAAAAUUCUGAUACUGCAACAC  
>P3492  
GCGGGGACCUCCGGCGAAUAAGGUCGGCCUGCGGGUAGGC

>P3493  
AACAGCAAUACAAGAGAAGAUUGAGCAGAACCGACGGGCA  
>P3494  
GGGGAACUAGAGGCCGGGGACAGCAAAGGCGGCGGUGGCG  
>P3495  
GCACAUCCACACCGGUGCAACAGUUUGCCAGCUAAAUUCA  
>P3496  
AGGAGCAGGAAGCCCAGGAGAGAGGGGAAGCAGCGGGGAGAG  
>P3497  
GUCUCCAUGGCGGGGAGACGAGGUGACCAGAUCCGCUGAG  
>P3498  
GACACUCGGCUCAGCCAAGCAUCCUCCUGGGGGCCGAGGA  
>P3499  
CCAGCAGCCCCGCGGCACUCAUGUCGCCUCUGACCGCAGCU  
>P3500  
GGGAUUUCUCAUCACCCAGGACGCUCCUCCAGGCCUCCAC  
>P3501  
AUUUCUCUCCGUCCUUUACACUGGCUGUUGUCACCUUCCC  
>P3502  
UCGUAGCUCUUGGCCGGGGACCUACUAAGUGCUCGGCUCU  
>P3503  
UCUGAGGCAGGAGCAUUUCCAGGGGAAGCGUGGGCUGGACC  
>P3504  
CCGCCCCCGUCCGGGCAGGAGGAGCUGAAGAUCGUGAUC  
>P3505  
CGUCAAAAGGCCCGAAAGCCACCACUCCACCAUCUUGCGG  
>P3506  
GAAUGGCCCCACGCAGCCCAUGCCCAGGCCCAGGCCUCG  
>P3507  
CUUCCUCCCCGUCCUGCUCAAGUCCUCAGGGCCUGCAGAA  
>P3508  
CCCGUGGGCGCGAUGAGGUCACUGAGGAAUACAUGGAGUUG  
>P3509  
CAUGGAGCCCAUCGCGGCUGACGAGAUGGUCAUCGAGUACG  
>P3510  
CACAGAAGUUUGCUGGAGUCAACAAAGCGCCGUCUGUCAUC  
>P3511  
CACUGGGCCCUGUGACAGUGACCUGGGGGCUGCCCCAUGC  
>P3512  
GGACGCCGCCGGUCGCCGCCACCUGUCCACUGCAGCAGCA  
>P3513  
AAGCCGAGAAGAUUUAGCAGAGUUUAAGCCGGACUCCAAG  
>P3514  
GUCUUUUCUGGGGCUAGUCCAUUCUCGCUCUGUAUCACUAGC  
>P3515  
GAGCGAUUUAGUCUGAGGCGAGCUUCGGAGCGGCCGGUAC  
>P3516  
CCCGCCGCUAUCGCCAGCUGACCAACACAUGCAACUCGUC

>P3517  
GAAGGCCUGGUGGAUAAUGAGCAGCUCCGCCACGAGCUGG  
>P3518  
GAGCCUGGUGCGCGAGACAGAGGCGGCGCUGAGCCGGGAGC  
>P3519  
GGCACGAGUCGGGUCCUGAGACCAGGUAAGCAUCUGCGGAG  
>P3520  
CCAAAAUCUGAAGCAGCAGAACCUCCAAAAACUCCACCCU  
>P3521  
UGUGUGGCGAGGGGAGGCGCAGGACCUCUCUCCAGAUCG  
>P3522  
AGCCGCCCGCGCUGUCUGAACGGGUCCGCCGGCCGCGCCG  
>P3523  
GGAAGGUGCGGUACUCGAGGAGGACACGGUGUCGUUGUUG  
>P3524  
UGUCUGCGGCCUGGGGCCACCCGCGGCUCGCAGGGCUCC  
>P3525  
CCCGGCCGCCCGCCGCCAUGUCCAAGGAGGAGCGCCCC  
>P3526  
AGCGGCGCCCGCUCGCCCGCACCGCCCCAGAGCCCUCAU  
>P3527  
GGAGGGAGCGGACCCUCGAGCCCCGCCUGGCCCGCGGGGC  
>P3528  
UGAGGAGGAAAGAGAUGGGGAGGAGGAGGAAGAGCGGAGG  
>P3529  
ACUCUUCAGCCUCCUCUGAAGGUCCUCCUCCACCAUCGUC  
>P3530  
GCCAGCUCCGCCGAGCUGAAGGCGGGCGCCAGGCCCGAG  
>P3531  
CCUCCGCGCCAGACGCAGGAGCCGUCCCCAGGGCUGCGGC  
>P3532  
GAGCGGAGGCCUUUGGCGACAGUGAGGAGGACGGAGAGGAU  
>P3533  
GUCCUGCGGGGCCAGCAGCAGCUCCAGCCACCAGUGCCCG  
>P3534  
GCUGGAACCAGUUCAGAGGAACAAGGUUUUGGUAGAGGU  
>P3535  
GAGACCGCAGCUUCCCGCAGAGCUCCGGAUAGGGUCCAUG  
>P3536  
AGAAAAUGUUGAACAUGGAUAAUAUAUAUUGGGAAACCG  
>P3537  
UGCCAUGGUAUCCAUCUUCAAUUGUUUGGCCUUUUUUGA  
>P3538  
GCUAUGGGACAGAGCCCCGUAUCCGCCAGCACCACCUGAGG  
>P3539  
GUGUGAGCAGCGGGUCAACUACCUGGCAGGCGGCACGCGG  
>P3540  
AGGUCAGUCAUAUCAUUUGGAUAAAAAAUAGAACAAUCGG

>P3541  
GGUCUGGCCGUUCCUCUGACACUCAGAAGGACACACAGACA  
>P3542  
GCUGUCUCCGCUUUUCUUUCACCUUCACAGAGGUUCGUGUC  
>P3543  
CCAUGAGCCUCUGGGUGGACAGUAUCGGCCUCGUCCUUG  
>P3544  
CGUCUUGGGCCUAGCGGCGAGGCGACCCGCACAGGUGGGC  
>P3545  
GGGUAGCAAAGUGUUACAGAAAAGCGGACUGGAUAGACAA  
>P3546  
GACGUCGUAUCUUAGCGUCAGCGAGGGAAGGUUGAGGAGG  
>P3547  
GCCGAACAGCCAGGCUGCCCAAUUGCAACUGUAGACCAAUG  
>P3548  
GCCACGCAACAGGGAUCGAGAUAGAUUGCGAGAACGAGAAC  
>P3549  
AGGGAGUCCAGCCUAGACAGUCCCCGAAGCGCCGGCGUG  
>P3550  
CGCGCGCAGCCAUGGCCGAGAACCCAGCUUGGAGAACCAC  
>P3551  
UCUACGUUGGAGGUAACAUAUACGGGUCCUGCUUAGGAGA  
>P3552  
GAGUAAGCCAAAGGACGUGGACCUGACACUACCUGGCUGGG  
>P3553  
GGAGCGCCUCAGAGUCUCUGAGCACGCAAGAGAUAAACCGA  
>P3554  
GAGGGCAGCAGCCAGGGGACAAAGGUGGGACAAGAGGCUCU  
>P3555  
CCGCGAGCCAAAGCAGCGCCAGGGCCAGCACCAGGAAGCG  
>P3556  
GAGGAAGAGAUAGUGACCGUAUUCaucagaagaaggaacu  
>P3557  
GAAUGAAUCCUCUGCCCCGACCAGAUGAAAGAAUCCCUCG  
>P3558  
UCCUGCGCCCUGCAAGAAGGAGCCGGCCUGCCUCUCUCCGC  
>P3559  
GCCGGGGGCCACCAUGUCCGAGGGCUCGCGAGUGAAGAGGA  
>P3560  
CGGGGCUGAGCAGGUUUCCCAGGAGCAGGUAGAACUGUUGC  
>P3561  
AUCACAAGUACAUCCCCGGAGGGCAGUGCUUUAUGUACCU  
>P3562  
AGCUCGUGCAUGGUGCCGAAAGUUUUGGAGCAGGGCUUGGC  
>P3563  
CGCCUCCCCACUCGGCCGGCAGUUUCAUCUCCGCCAGCGGC  
>P3564  
GCACCGCUGGUCGUGCCGGACGGCGUGGGCGGUGGCCGCC

>P3565  
GGUGUAGAGGGCGAUCAGGUACUUGUGCUUGGCGUCGGCGC  
>P3566  
CCUGGAGCACCUGGGGUUCCACUUAUACCUGGAUCACCUUU  
>P3567  
GAGCCAGGCUUGCCAGGGAGACCGACAUCCCCUUAUCACC  
>P3568  
GGGCCACCAGGAUACAAGGAUUCCTGGGACUGCAGGGACG  
>P3569  
CCCUUUGGUCCGCGGGCUCCAGGGGAGCCGGAAGCCCAGG  
>P3570  
CGAGCCGGCCAGCCUCGGGGAGAGGGCGCGGGGGCGCUGGG  
>P3571  
CGGGGGGUGGAGGAAGCGGAAGCCGCGCCGAGUCGCCGGG  
>P3572  
GAGGACGAGGUGACGGGGCAAGGGGAUGUGGGGACGAGGUG  
>P3573  
GGACUCGGGAAGGCGGCCCGAGUUCUCCCCUGCAGGGCCGC  
>P3574  
CCGGUGCAGUCGUAAAAGCCAGGCCCAUGGAAGGCUCGCUG  
>P3575  
GGCGACGGUGGAGGGAUGUGAGUGACUCUGAGUGUGGAAGC  
>P3576  
UCAGCUCUACUCAUUUCGAGACUGCUAUUUCGAGACACAUA  
>P3577  
UGCCAGAGACAGGAGUCGAAAAGAUGCCUGUGGCUGGAGG  
>P3578  
CCUUGUACCCUACUCGCGAGAUCUGCCCUCAGCCAAUUGA  
>P3579  
GUGUUUGGGCCGGGCUCUUUAUUGGGCCUGUAUGAAGGUCA  
>P3580  
GGGAGGCGGCGGUGGCGGCCAUGGCGGCAGAUGGAGAGCGU  
>P3581  
UGAUGGGGAGCCGGUAGAAAACGCAAAGAUGUUCUUUGAA  
>P3582  
CAGAAGGAGUGAGAACCCUGACCCCUAAUCCCACUGCAUCC  
>P3583  
GGCGGCGCGGCGGGCUGGGAGCCGCGCGGGAGCCGGGCUC  
>P3584  
UGAAAGGUGGACAGAAAAGAAGUGCGAUGAGGCAAUGU  
>P3585  
CUGGAGGAAGAAGCCCGAAAAGGUUUUAAAAAUGUGUUGU  
>P3586  
AGAACAUACCUCGAGUCUUAAGAGGACGAGUUGCCCAGC  
>P3587  
AACAGAUGCCACAGCCCCGACUCAGCAGCAAGUUACCAUU  
>P3588  
GCCACCUGCCGGGGUUUGAGACCACUUCUCUUCGGGCCAA



>P3589  
UUUCUAUCCUGCUUUUAUU AUGGCUCGACUCCUCUUCUU  
>P3590  
UCUUCCAUCCGCGUUUCAAG AGGGAGUUCAUUCAGGAACCU  
>P3591  
GCGUCCCCGAAAUAGCUGAC ACACUAGGGGCUGUGGCCAAG  
>P3592  
GGGCCGUGGGCUC CAGCCGAAAUCGGGGGCAACGACUGA  
>P3593  
GGUGCGGCCGUC CAGCCCAACCCAGCGAUGGCCGAAACC  
>P3594  
AUUAGACAAGAGAUUAUAC ACACUGAGCCUCCACCCAGUC  
>P3595  
GGUAGCGCAAGGCGAAGAGC AGGGCGCCCCAAUCGGCGGC  
>P3596  
ACCCAGGCUCAGCCCAACA ACGCUUCACCCAGGUCUCCGA  
>P3597  
AACAGACCAGGCAUCAGCAC AACAGACCGGGUUUCCACG  
>P3598  
CGGGUAGCGGGUGUCCUUC AACGCCCCUCUCUACACCU  
>P3599  
CCGGGACCCGUCGCAAUA AGGUGGCCUUGGUAACGGCCU  
>P3600  
CCUCCCCUGCAGCGUGGCC ACCGCCUGGUCCACAUUCUGC  
>P3601  
UCGGUUCGGCGACAACGCUA ACUCGACUCGCAGGUAGCCCG  
>P3602  
UAAGUCCCUACCAGCAGCAG AAAGGCUGGGCAUCAGGCUGG  
>P3603  
CUUGUCGCCCACAUUAACA ACUCCUGGGCCAAUUCUCCU  
>P3604  
CUGAAGGAGACAGAGAAGAU ACUGAUCAAGAAACAGGAAUU  
>P3605  
AGUUGCCGGCGAGAACUACU AGCCGACGAAUUCAGCUUCG  
>P3606  
CCAUCCGUGUGGCCCUCCU AUAGCCCGAUUCGCCCGGGCC  
>P3607  
UACUACAGAAUCAAUCCUUG AACACUGCCUCCACGUCGCCG  
>P3608  
AGCCAGUAUUCGGGAAAGGC AGACAGGUACUGACUUAUUCU  
>P3609  
GGGGAGCAAGCUUAUGCGGG AAAGAGGGAGGGGGACUCCAG  
>P3610  
CGGCGGCGGGAGCGGUCCCC AGGAAUGUCGCUGCCGCCGCC  
>P3611  
AUGGGAGGUGAGGAUGAUGA AGUUGAUGGCGAUGAAGAAGA  
>P3612  
GAGAGCAAAGACACAGAGCA AAAGGAAUAGAUAAGAUAU

>P3613  
AUUGUUGAAGAAGAGAGACUAAGAAAAAAGAAGAAAAAGA  
>P3614  
CGGAGCUUAAUCGCCCCGAGCAGCGGUGACAGGAACCUGGAG  
>P3615  
AAUCA AUGCUUUCUUCGGUGACUUCAAGCACUUUCAGAUCA  
>P3616  
UCACGCCGGGGAGGCCGAGACAGCCGGCGGUACUCAUAGA  
>P3617  
UGAACCGUGUCCUGCAGAAACUUGAUAAUGUCCUUCUUGG  
>P3618  
CCGCGUGCGGAGGACCCCGAUGGCGGCGCCGGGUGGCGGG  
>P3619  
GGCGGCGACUGGAGAAAUCAAGUUGUGCGGUCGGUGAUGCC  
>P3620  
CUCCGCCGCCUGUCCGGAGCCCGGGUCGCCCGCAGGG  
>P3621  
CGGCAUCGUGGGCGUGGAGACGUGGCAGAGCUGAAGAAGA  
>P3622  
UGUGCACACUGGUGGGGAGAGUCCGACGCGCCUGGCUAGG  
>P3623  
GGUCUGCAGAGGUCCGGAAGGCGAGCUCGAUGCGGAGCG  
>P3624  
UACCCGGGCCGCGGGUCCCCACGGAGCCCCGAGCAUAACGG  
>P3625  
GCAGCGCCAGCAUGUAGCAGAGGCCGCGAACGUGAACGCC  
>P3626  
GCCACACGGAAGCCAAUGAGAUUAGGGCAUACAGAGGGACA  
>P3627  
GCAUCUGCUUUGUAAGACCUACACGAGGUGCAGGAGUGGUU  
>P3628  
GAACUGCAGCCGCGGCUGGGAGUGGUGCUGCCCGGACGGGG  
>P3629  
UAUGAAACUGCAGAGAAAAAGAAAUGAGCUACUACUGGG  
>P3630  
GACCCUCCUCCCAAGGCUCACCGUCCCCAACAACCCCC  
>P3631  
AACUGGUAAGCCAGCUCCUCACCAAUCCACUCGAGGCUC  
>P3632  
CCUUGCAUGCUGCUUAGCCC AUUCGCAACCCAUUACCCUG  
>P3633  
UCUUGCUUGAUGUCCGCCGACUUGCGAUCUGCCCGGUGGG  
>P3634  
CCUUGAGGAGCGCCUGGGGACCUUGCAGAGCUCCUGGGACA  
>P3635  
AGGGGAGGGGAAGUCACCGACAACAACAAGCCGAGUCCCC  
>P3636  
GUUGCCCGGCCGGGGACCCGAGCCGAAAAGUUAUCGUCAGA

>P3637  
GGGAGUAGUAGCGGGCGCUGCAGCGCCAGGCGGCCGCCGCAG  
>P3638  
CUCCGCCGCCUCCUCGGAGCAUUUCGAGAAGCUGCACGAGA  
>P3639  
CUGGCCGCCGCCUCACCUUGCACUGCCGCUUCCGACCGGGAG  
>P3640  
UGGUGACCCGCAGGGGCCCAAGGUGGAAGGCGUUGUCGGCA  
>P3641  
CCAGGCCAGCUCUCCUCUUC AUGCUGGAACCGCCGCCGCCG  
>P3642  
GAACAGUGGUAGUGUCCUGGAUUACUUUCAGAAAGAAGUA  
>P3643  
GGGGCGGCGGCCGAAUGGAGAGAAAGGGCUCGGCGGCCGGG  
>P3644  
GUCGCGUGGUCUGCUGCAGGAGGAGGAGGCAGCAAACG  
>P3645  
CUCAGGACACCGGCAGAUCCAUCUCAUCUCCAUCUCCGCC  
>P3646  
GAGUGCGCUCCACUGGUUCGAGAUUUCGCCGUCGCUCGC  
>P3647  
AGACCGAGAUCGGGAUCGAGAGAGAGAUUGACCGGGAUA  
>P3648  
GCUCAGGUUCCUCCAGACCAGCCGCUUUUUGUUUCCGAU  
>P3649  
GAAGAAGUUGC UUAAGCCUCAAAUCUGAAAUUUUCAAGGAA  
>P3650  
AGCGCUGCCAUGCGGGAUACAACACUUCGCAGCUCUUCG  
>P3651  
CGAAUCGCCGUGCGCGGCCUAGCCCCGGAGCAGCCGGUCAC  
>P3652  
UGCCGGUGGCCAGGCCUCGGAAGCCAAGGGAAGGGACAG  
>P3653  
GACUGCGAAGGGGACGGCUGAGCAGGAGGCAGGUAGGGCUG  
>P3654  
UCUCCAUAAUCUCUGUCCCACUCAUUAUCCAAACUUCUAU  
>P3655  
UGCCAGCAGAAUGGAGGAUAUCUUCAGCUCCCCGAUGAUU  
>P3656  
CCCUCGGCUCUCCGCCGUGAUGCUGUCCCGAUCCCGCUGU  
>P3657  
CCUGAUUACAGUGGAUUAUGAAAUUUUUGGGAAGGUGCAAG  
>P3658  
GGGAGAGAAGAGCUGGGAUCAAAACUCAUGUGGAAAAAGGU  
>P3659  
AGGUGGAGAGAGUGGUAAAAAGAAAUGAAAUUGACAAGCU  
>P3660  
CAAAGAUAUCGGCUUGACUAGGCCCUUUGCCUGAACCUC

>P3661  
CCUGUCCUUCUCAUCACUCACAUCAUCUUCACUAUUGAGG  
>P3662  
CUCCUUGGCGCGGGGUGGGGAGCGGGCAACGCCCCCGGAC  
>P3663  
GGACCAUGACCACCACUCUGACUUUGACCCUGGAGGAGAAA  
>P3664  
GCGCCUACAGCGACCCCGAGACCAAGGGCAACAGGGAACUC  
>P3665  
CUCACGGUCCCGCCGGCGCCACCACCGCGGUCACUCACCGC  
>P3666  
ACAUAAGUAAAUGCUGCUGCACUGGCUAACAGAUACAAUCC  
>P3667  
CUUCAUCUGGGCCACGCCAGACAACAGGCCUUGGAAAGGGU  
>P3668  
GCUACCAGAGCCUGCAGUCCAUGAUGAAGACCGAGGGACCC  
>P3669  
AGCAGCGGGGUGGCGGAGGAGGCCUCAUGGAGGAAAUGAA  
>P3670  
CCGGGCUCCGCGCCAGGAGGAGCGGCCAGGCCAGCCCCGG  
>P3671  
AGAAAGAGGGGAAGAGUAUUAAAGACCAUUUCUGGCUGGGC  
>P3672  
GUGAUCUGAUAGAGCUGGAGAACCGCAGGGCCCAACAGAC  
>P3673  
UCAGCGGAGCCCGAGGACGCAGCCGGGUCCAGGCAGGGGCU  
>P3674  
GCCGCCCGCCGAGCAGCGGGGAGGGGCUGUCCAGCGACGUC  
>P3675  
GCGCUGUGUGGAGGCCCGCGAGCUGAAAUUCGCGGUGCGAC  
>P3676  
UGACCCUCGCAUUGUGCAGAAUUAAGUGCAGUAAAUGUC  
>P3677  
GCUCCUGCUGCCGGGGCUCCACACGUGCCUCCGCGACGCGC  
>P3678  
GCAGGCAUCGCUGACCAUAUAAGGUGCCUCUGGCCUCCUG  
>P3679  
GCGUCCGGAGCGAGUUGACAGCCGCGGCAGGCGAAGGCGC  
>P3680  
GCGGGGGCGGCUGCAGCAGGAGGCGGGCGGACCGGCUCCC  
>P3681  
GGCCCACGAACCUUGGCCUGACCCUCAGCUCGUCCCCAGCU  
>P3682  
GGAUUGAGCCGGGAGGGUGAAGGCGAGGGACUGCAGAGCCU  
>P3683  
CUUCUUUGCUGGCUGCGUAGACACCAGAGGCCUCAACCUGC  
>P3684  
CACAGAGGACGAGGAGCUGGAGCCGCGGCCAGCCACCUGA

>P3685  
CUGGCACAAGUUCUGCCUCAAGUGCGAGCGCUGCAGCAAGA  
>P3686  
CAGGCAGCACCAACUCCUACAGGAUGGGGAAAGAAGGAAAU  
>P3687  
AGGCGAGCCUGGGCAGCCAAACACAAAGAUUCAGAGGGCAU  
>P3688  
ACUCCCAGGGCCCGCCAGGACCCCAAGCCGCGCGGACG  
>P3689  
GAGAAUAAAGGGUGGUUUUACGAGGAAUGAGAGUGAAUA  
>P3690  
CCAUUUCGGGGUGCCAAAGCAGCCAUGGAAGAGCCUGCAGC  
>P3691  
GUCCCACUGGACUCUUAUCCAUCCGUCCUCUCCAGCUCAC  
>P3692  
CGAAAGAGCCUUGGGGGCACAUUCGGGGUGCGGUGACCCG  
>P3693  
GCCGGCACCUGCCGCGGAGACAUGUUGCAAAAACCGAGGA  
>P3694  
CCGAGCGGAGUUCAAAUUUGAGAGCGUUUGGAAAUUGGAAG  
>P3695  
GGGAAGGAGGACGCGAGGGCAGCCAGGCCCUAGGGAGCAGG  
>P3696  
GGCCUCCGCGAGCGCCGCGAAGCCCCGGCCACGGCCACGG  
>P3697  
AAGUUUCAUGAGAUUGAUAUUGUCGAUUUUUUGUUAAUC  
>P3698  
UAGCUCGGUUGGCAAACUGGAUAUUUAUGCACCUCCAUUUC  
>P3699  
CUCCACUCCAGUGGAAACUAAGGACCGCUCUGGGCAGCGG  
>P3700  
CCCUCCAAGCGGUGCGGACAAGGGGCCACCCGAGAGUCUU  
>P3701  
UGAAUAUCAUCUUUGAAGUAACACCAUGUUAGACUCCUG  
>P3702  
AGUGGGAGAGCUGGUCAGGGAUGGGAUGGAGUGAAGGGGGC  
>P3703  
ACAAUGAGCGGGACUCUGACAAGAAAGUGAGGACGGGGAA  
>P3704  
GGGUCUGCAGAGCUGAGAUCAGCCGGCCAAGUCCUGGGCC  
>P3705  
GGCCUAUCCCUGUGCCAGGCACCAUGAAGCAGGAGUCUGCA  
>P3706  
CGAUUGACCAAGCUUCUUUUACGACCUCCAUGGAGUGGGAU  
>P3707  
ACCGAAGCCAGGGGAGUCCGAGGUGGACCUGCUGCACUCC  
>P3708  
CCUUUCCCUCACCCCUAAUUACUGCCCUUUUACAUCUAAC

>P3709  
GGAGCCCCUGAUGAGAGUGGAGCUGAAAAAAGAAGCAGGGU  
>P3710  
GCAGAAGAAUGACAGGCAACACCUGAAGCCACGCAGCCGCC  
>P3711  
UCACUCCGGGCCUGCGGAAAGAAUUCGUACCGUCCUGUU  
>P3712  
ACCGCGCCUGCCCGACGCUCACGGCUCCGGGGGCCAUGGC  
>P3713  
GACCAGAGCGGCCUCCGGAGAGCCACGGAAACAUGACAGC  
>P3714  
AGCUGGCCUUUUAGAUAUUCAUAAGCUGUCUUGGAGACACA  
>P3715  
GGCAGCGACGGUGAUUCCCGAACUUGACUAAUCCAAACA  
>P3716  
GCUGUUUUUAUUAAAACUGUAGUCUGUGCUGGUCUCAGAGA  
>P3717  
GAGAAGCUUCCGUGUUCUCAGCCUCAUCUUUAUGGGUGC  
>P3718  
UGCUCGCUCAGCGAUGCAAACGCGCGAGGCGCACGGCAG  
>P3719  
AAAUGAAAUACAGAGAAGCACAAAAAGCAAAGAAGAAA  
>P3720  
AAAAGCAGAAGAUGAUGAUAAAGCAAUAAAAAGCAUAAGA  
>P3721  
GUCAGAUGAUGAAAAGAUACAAAUUCUGAUGAUGAGGAGA  
>P3722  
CCUCAAGGGCAAGCUGGAGGAGGAGCGAGCCAAGCUGCACG  
>P3723  
GCGGAGGGCUCGGGAGGCGCAGGGGACUGGAAGAGUUGGCU  
>P3724  
UUUUCUUCUCCAUCUCCUCACGUUUCUUUUUCUCCAGAG  
>P3725  
GAUCCGGAGGGAGAAGCUGAAGGGGCUUGGUCCGGAGCCUC  
>P3726  
GCAGCACUUACCGUGAUCCACCUCCGGUCUGUGAUGAC  
>P3727  
AAGACUACAGAAGGAAAGAGAUCUUGCCUUUUGAAAAGAUG  
>P3728  
CGGAGCGGACAGAAGCCGCCACGAGCCCGGCAGGAGGUUC  
>P3729  
CACCACACACGCUCCACCCCACUCCUCACAUUGUCGCGCGC  
>P3730  
AGACACUGGGCAGACAAUGAACCCUUUGUAACACAUGAGG  
>P3731  
GCUGGUGCACUGGUGCACCCAGCAGUUGCGGAAGACUUUCG  
>P3732  
GGCAGCGGCGGUGGCGGACAGCCGAAAGGAGCAGGAGGCG

>P3733  
UCCGCAGUUUCAAAUAUCUC AACACCCAGCUGUUCUGUUUC  
>P3734  
AAUGAUGAGAAAGGUGUAGA AGAUGGAGGGGAAGUGAUGG  
>P3735  
CCCGGCGUCCCGUCGAGCCC AGCCCCGCCGGGGCGCUCCU  
>P3736  
AAGCAGCAGAGGGGAAGAU AAAAGCCACCGACCUCAUGGU  
>P3737  
UGCUCAGGUAGUGGAAGACG AGGAGGACGAGGAUGAGGAGG  
>P3738  
GGUUCGGGGUUUAUUGAUUG AAUUCGCCGGCGCGGGAGCC  
>P3739  
AGAAGAAAUAAGCGAUUAC AGAAGGAACUAGUAUGUGUG  
>P3740  
CCCAUAUAUCUACCACUGC AGACAGACACUGCACACACGC  
>P3741  
AUGGAAGAGGAGGAGGUCCU ACAGUCGGAACAUGAAGGGA  
>P3742  
GGAGGUGGCUGUGGAAGGUA AGUAUAGACCUACAUCUCUGU  
>P3743  
GCAUGGGGAGGACGGGCCCG AGAGCGCCGCUCCUCCCCAAA  
>P3744  
GACCUGGGCAUGGGUGGUGU AUGUGCCAUUGUGCAGCUCCA  
>P3745  
UCUCAAGAUCUGAACAGCAC AGCUGCCCCACACCCCCGCCU  
>P3746  
CUGCCGCCAGCCCGCCGGG AUGCAGUCCGGGCCGCGGCC  
>P3747  
AGAAUUGUUAAUGAAGAGGA AGAACAAGAAGCCCGAAUUG  
>P3748  
AAAACGAGGGCAGACGCAGC AGAGGGGCCGCUCCGCGCCAC  
>P3749  
CACCUAACGGCGCAGGAGAU AGAGGCGGGCUCGAGGUGAUU  
>P3750  
UGCCGAGGAGCGGCUACGCC AGUCCCGCGUACUGAGCCAGA  
>P3751  
GCUGCUGGGGGCGGGGCUUA AGCUCUGGCAACCGCCUUGGG  
>P3752  
GGAGAGGCUACGUGAACAGG AGGAGAGGCUACGUGAACAGG  
>P3753  
CCGCAGAGUCUCCUGCUGCC ACAGCCUCUCAUCCUGUUGCC  
>P3754  
UACGUGCAGAGCUGUCGCGG AGCCGGAACAGCAGCGGUGAA  
>P3755  
GUACGGUCGUGACAAGUCAC AGCGAACUUGCCCUCGCGCC  
>P3756  
GACACUGAGAAGCCCAGGAG AGGUGGCCUCUGGUCCACUAC

>P3757  
UGUUCACACAGCCUCUCCUC AUGUUCACGUAGCCUCUCCUC  
>P3758  
GUGGGACUGGGGCUCCAGCU ACUGGUCUGGCUGCUGCUGCA  
>P3759  
CCAGCUCCCGCAGCCUCUCC AGCUCCCGCAGCCUCUCCAGC  
>P3760  
AGACUGAGGUCCAAGGCUUG AAGCCUAAGUGAUUGCCCCAG  
>P3761  
UCCCAAGGUUGACGUGAGGA AUCAAUGAGAUCAUCUGUGUU  
>P3762  
UAGAGAGAAUGGACUGGAAG AAUGUGCCGGUGAGCCUUUGU  
>P3763  
UGUCUGGGGCAAGUCCAGG ACCGCAGGAACCGCGACCCCG  
>P3764  
GCCGGAUGAACUUGUCGUAC AGCACAGCACCGUGGACGUUC  
>P3765  
CUCCGCCACAAACUCCAAA AAGCCCGCUCAACCCAACGCC  
>P3766  
CCUGUCUCUGCUCUCCUGUC AGUGAAAUGGGUUUGACCAUG  
>P3767  
AUGGGAGAGCCCGAGCCACC AGGCCCGACGUCUACCAGCU  
>P3768  
GCAUUCGGAGAGCAGGAGCG ACGGUGUCCCGCGGCUCGGGC  
>P3769  
CCCAAGGGCGGAAGUGAGAA AGUUGUCUGCGUCUCGAGGCG  
>P3770  
CAACCUCGUCUGCGGCGGAC AUGGCGGACGAGCCCGAGUCU  
>P3771  
CCCCGUAGUCUCCACAUUUG AACAGCUCAUUGCCCUCCUUC  
>P3772  
CGAGAGCAACAACCACCCGC AACACCGGCGAUGUCACUCC  
>P3773  
CUUUGUCUUCCUAGAACUC AUUUGUUUCUCCUUGUUCUCC  
>P3774  
ACUCGCCGGCGGGCGGGGAG AAAUGAUAAAAGAGAGAGAGG  
>P3775  
GAGUUUUCGUCCCAUUCAA AGUGGAGGAGGUCGAAGAUGU  
>P3776  
CGCAGCCCGGGCCCGCCACC AGCGCUUCGCGCCCGCCGGAG  
>P3777  
UAGGGCGCCUCGGGCCAGGG AGCGCGGAGGAGCCAUGGCCA  
>P3778  
CGGGCAGGCGGCGGCUUCCC AGGCCGGCGGGGCGCGGGCG  
>P3779  
AAGUUACAAAGGAAAUGCAA AGAAGCCCCAGGUGACUGGAG  
>P3780  
AGGGCCGGCCGCGCGGACAG AGACUCCUCUUGGCGUCCAU



>P3781  
CUGAUCGUGGAGGAGGGACAACGCUGCCACCGCUUCUCCUG  
>P3782  
GGCGCAAGAGGAAGAUGAGGACGAAGAAGAGGCGCUGCCGC  
>P3783  
CCCACACCUGAGUCCCGUUCACGACUCCCCAGCCCUACUCC  
>P3784  
CCUCUCCUCUCUCCUCCUCAAGCGAUCCUGAUUUCUCUUCU  
>P3785  
ACGGAGGGGGACGGGAACGAGAGGGGCGAGGACGUUCAG  
>P3786  
GGAGGACGUCCUCGAUGUGGACUCCUGCUGGUGCAUCUGGU  
>P3787  
UGCAGCCUCCACCUCUUCAUCCAAGACCCACCAUGCCA  
>P3788  
AGCGCCAGCACCGAGGUGCCAGGUGCCUCGGAGGAUGCGGA  
>P3789  
AGGCAGGCGGGGCGGGCAAGCAGCAGCAGCAGCAGCGGC  
>P3790  
GGGUUCUUGCUGACGGAGGUAGUUGGUCCUGCGUGGGGGAU  
>P3791  
GACGCUCAAUGUUGCCUUCAGACAGGGCGUGCAGGACCGG  
>P3792  
CCAAAGACCGGGGCGCCAAAGGGGCAGAGGGUGGUGGAGA  
>P3793  
CUCCUCGGGCUCCUGCCGGCAGUGGCACCAGGUGCCCAGCA  
>P3794  
GAAGCUCGAGCGGCGGCCAUGGCCCGAGGUAGCGCGCGG  
>P3795  
CCUCCGAGGGGUGUCAGGGGAAACAGGCCACCGCCAAAGCC  
>P3796  
GCUCUCUGUCCGCGGUCACAGCAGACGGGAGUGGCCGGCC  
>P3797  
UGCCUGGCUCCACACAGCCAUUGCAUUGUCACUCUGCCUCC  
>P3798  
CCGUGCCC GGCGCCGGCUCCAGCCGCGGCCCGCGCGCUGG  
>P3799  
CCACUUCAGCCCCACUCCACCAUCCUGUGAGCCCCACUC  
>P3800  
GAAAGGAAUCAAGAAACGGCAGAGAGACUGAGGGUUGCAGA  
>P3801  
CAAACGCGUUGGGCUCCUCCACCACCUUCAUCUUCGCUGCA  
>P3802  
GGCGGGCUGCACUCAGGACGAGUGCCAGGCCUGCUGUUC  
>P3803  
GACGAGGGCACCAUGAAGGUAGAGGUGCUGCCUGCCUGAC  
>P3804  
UGUCUGUUGCGCAGGUGCCUAGGCCGCGCUGCCGGGCUCG

>P3805  
CCGGGACCCUAGCAGGUUUCAGCUGGAGCGGCGGGCGGC  
>P3806  
AUGGAGUGAUGUGGCUUUGAAGGGUCCUCUGGCUGCUGAGC  
>P3807  
UCCUCAGAGACGUCUCCCACACCUGCUCCGGGCGCUGGAC  
>P3808  
GCCGCCACCGCCGCAACUGCACCCUCGCCCUCUCCCGCCC  
>P3809  
AAAGGACACUGCCCAGCAACAGCAAGGGCACGGCCUGGCCA  
>P3810  
CCCGUCCGCGUUCACUCACAACUCCCCCGUCCAGGCGCCGG  
>P3811  
ACACCCAACUCAGGAGCAGAAAGCAAACCCUGACUGUCC  
>P3812  
CCCGGGGCGUCGGCAGCCGAUCCCGUUGUACAUGGCCCCG  
>P3813  
CUCGGGAGACUUAGGUGGUGAACGGUCCCGAGUUGGAGAGG  
>P3814  
GGGGCCUCCUCUCCCGCGACAGCGCCGCGGCGGAUCCUU  
>P3815  
UGUGAGCAGCACCAGUUUGGAGAACUCCUGGGCUUCCUGG  
>P3816  
CCCAGGGCCUCUGCCCUAGAGGCGUCUCUCUGUCCUGUC  
>P3817  
CCUUCUCUCCUGCCAGCUUGAAGCCUCCACCUUUGACCCC  
>P3818  
UGAGCCAGAUCGCACCCCGGAUGCAGCUCCGCCAGACCCCA  
>P3819  
CGCCACGCUUCUCACCCUAUAUAGAGGACCCACGCAAGACU  
>P3820  
CUUUCUGUCCUUCUUCUCGGAACAUAUACGUCCCCUGGGG  
>P3821  
GGGCGGUGCUGAGGUAGGAGAGGCAGACUCUGCUGAGGCA  
>P3822  
GUUUCUUUUAUCCACUUCUAUUGGUUCUGAUUUCUGCUCU  
>P3823  
GUAGCACUGGGCACUGAGCCAGGAGUCGGGGUGGGAGUCUG  
>P3824  
UCCUGGCCCCGCGGCCGGGAUCAAGCGUGGUCGGCGGGUC  
>P3825  
CGGGGAUGGAGCUGCGCGCUAGGCGCCAACUCCUCCCCGC  
>P3826  
CUGACUGGAGGCUGGCGGACAGGCGACAGCGACCUGCGGCA  
>P3827  
CUUUCUGGCCAAGGAGGAUAUCGGCCGAGUUUCCCCUAG  
>P3828  
GCUUGUGGAGCAGGAGCGAAAGUACCGGGUGCCGAGGAGC

>P3829  
CGCCAGGAAGCGGCGCUCGAACUCUGCAGCAAGAGUUCGG  
>P3830  
AGCUUCAGUCGGGCUGCUGGACACCCCUCGGAGCCGUGAGC  
>P3831  
UGCGAGGCCUCGCGAGCGCCAGGGAGGCGCCACGAGGGAGC  
>P3832  
UGGUCCGGCAUGAGACCGUGAGACGAGAGACGGGUCGGGGC  
>P3833  
GGCCAGGCAUGGGAGCUGGAGGUGUGGGGUAAUAACUGUU  
>P3834  
GCUGGAACUGCUCGACACUGACGGGCUAGUAGUGUGCGCCC  
>P3835  
UUCGGCGAGUAGAACCGCUGAGGCGGGCGCGGGCCCGGGUG  
>P3836  
AGAUGAAAGGAUGUUGAAUCACUUUGCAUGGCUGUAUGAUG  
>P3837  
UUGUCUAAAGUCAUUCUGAACUCGCGAAAUCUGACACUGGU  
>P3838  
AGGCGCCCCGGCCUUAUUCAGCCUGGGGAGCGCCUCGGUG  
>P3839  
CUAAGGCCUCCGCAAAGAAAAGAUGAAGUCCAAAAGAAG  
>P3840  
AGAGGGGCAAGGAGGGAACGAGUGGAAGAUUGCGUCACGAC  
>P3841  
UCAGGCACAGCCAGCCCGCCAGCAGUCUCAUCGGGGGCCGC  
>P3842  
AGUGAUCCAGGAAGGGCGCAGGGGCCGUUGGGACGAUCC  
>P3843  
GGUGACUAUGGAGGAGGAUAUGGGCUCGUGUAAAGGAGA  
>P3844  
GGCCAAGCGCCGCCCGCCAGAGAAGCGCGAGUCGCCGCCCG  
>P3845  
GAAGGUGUCUUGAGAUUAUCAUCUGCUGAGGGUGGAAGCGG  
>P3846  
AGACCAAGCAUGUCGGAACAGGAUUGGUCAGCUAUCCAGA  
>P3847  
GAGCGGCCGGAAGUAGCCGGAUUCUCUGAAAGACUGACCGA  
>P3848  
AAGGAGGCUCGCGAGCCUCAAGCCCUCGCGAGCGCCGCGGG  
>P3849  
GCAGUUUGAGGUGGACCGAGAGCCCUCGCUGGACCGAAACC  
>P3850  
UUUCUCUCGUGAGCAGGACCAGCUUCUCUCGGCCUUUCGCA  
>P3851  
UCCCGCUGACUGAGUCUCUGAGGGGCUACCAGGAAAGCGCC  
>P3852  
AUCAUCCGCAGACUCCGAAAAGGGUUCGAGGAACGCGCCU

>P3853  
GUCGGCGGGCGCCUGUGGGACAGCCCUGCCUCCAAGACCC  
>P3854  
GCAA AUGGUGAGGCCGAGUCAGGUGAGCUCAGCCGGCUUCG  
>P3855  
UGCGGCAUUGUGGAUGGAACAGCGGGAGCAAGUGAUCCC  
>P3856  
AAGAGGGAAAGGGGGAGGAGAGGGACGGGCCACUCUUCUCG  
>P3857  
GGAUGAGGAGAAGGUCUCACACCAGGCUGGGGACCACUGGC  
>P3858  
GGGCGCGGUCCAUGCUCCCGACGGCUGCGGGCUUCAGCAUC  
>P3859  
AGGUGAGCACCGUGCCCCGGAUCAGGUCCCCGUGGGGAUGCC  
>P3860  
CUGACUCCUACGAGGAAAAAAAAAAAAAAAAAAAAAACAAU  
>P3861  
AUGCAGGAGGGGAGCACACAGUCACCUCACAGCUCCA  
>P3862  
GAGAAAGAAGAGGAUGAGGAAAGGGGGAUUGGAAACCCAG  
>P3863  
CUGAAGGGGAAACCCUGUUGAGGAGGCAGGGAGAGGCUGG  
>P3864  
CACCCCGGCCUGGGCUGCCAAGGUCCGGGCUGGGCACAGUG  
>P3865  
GAAACAGGAGAAGGAGCGGGAGAAGGAGCGGCAGAAGCAGG  
>P3866  
GACGGCGCGGGCGGGCCACCAGGGGCGCCUGCCCGUCUC  
>P3867  
CCACCUGCCAGGCCGCACCUACAGCUGCCCCGACUGCGGCA  
>P3868  
AGCCCCGAAGGCCACUAGAGGGGAUGGAAACUAAGGGCC  
>P3869  
GGGAUCUACGCUGAGUUCGGAUGAUGCUCAGCUCGGGCCGC  
>P3870  
CCCCUGGCCAGGUACCUAGCACCUGGCCACCUGCUCCACCC  
>P3871  
GGCGGGCGGGCGGGCGACGACGAGGACGAGGAGCCGCGCG  
>P3872  
CAUACCCUACACCCACCACAUUCUUUGGAGUCAGCCAUC  
>P3873  
GGCGCCCGGGCCUGGCGCGGAGCCUGAGCCCGCCGGACGGG  
>P3874  
GAAGCGGUGGCUCUCUGUCAGCUUCCAUCGCUCCCCAAG  
>P3875  
GGGUGCCCAGACUGGCCUGGAGGGGCCUCUUCUUUCGUCC  
>P3876  
UGCACUUGUUGAUGAGCUCCACGAAUUGCUGGGACAGGACC

>P3877  
CAUGACGGUGGAGCAUGUGGAAUGCCAAGAUGCUGGUGUCC  
>P3878  
AUGGCGGUUCCAGGAGGUCCAGCCUCCACCUGGCCACCCA  
>P3879  
UUUUUUAGGUUUUGUCCAAGAUGAAGAUUCAUGCAGUGAUU  
>P3880  
CCCAGGCGCCGAGGCUGGCAGCGUGGUUCUGGGUAAGUGG  
>P3881  
AGAGAGAAGAUAAAUUCUACAGUAAAUAAGAUUUAGAAAA  
>P3882  
UGUCUGCAACUCGAGCCAAGAAGUGAGAUGGCCACCAA  
>P3883  
AAAAUAUCAUCAUGCCACCACCUCCGCCGUGCCUCCCCG  
>P3884  
CUCAGGUCCUGCGGCCCGCCAUGCCCGAGCCCCACAGUGGG  
>P3885  
GGAGGCGACUGGGGAUCUGGAUGGGGCUCACUGAUGACAUG  
>P3886  
CUCCGUCGCCAACCCCGCCACCGCGGGCAGCGCCACCGCC  
>P3887  
AAGCGGAAAAAGAGAAAGAAAGGAGAGAAGCAGAUUCCAGG  
>P3888  
AGGAGCUCUGCAUUGAAGGCACUGGGGUGAGGCUUACUGCC  
>P3889  
AGUCCUCCUCAGCCCUCCCCAAGUCGCUUCUGUGGCACCCC  
>P3890  
GGGAGGAGGAGCCACCUGCAGAGAUGGAAAGAGCAGGCG  
>P3891  
CGCUGCUCUGAGCCCUGGGCACGCGGAACGGGAGGGAGUCU  
>P3892  
GAGGAGCCGGAGACCAGGCACCUGGGCAUCCUCCCCUCG  
>P3893  
CGCGCCUCCAGCAGUCCUCAGACUCCUCUGGCAUGCUCUU  
>P3894  
GAAUGAGCGACUGAGGCAGGAGAUGCGGCGCUGUGAGGCCG  
>P3895  
GGGGGCGGCGCGGGGCGCAGAGGGUGGCGGCGGCGCGG  
>P3896  
GCCGGAGUCGGGACCCAGGAGUUUCCUGUGUCCAGCGCUG  
>P3897  
GCAGCUUCCCAGCUGCGCCAUGGCCGCGCCUGCCGCGCGG  
>P3898  
CGGAGCGGAGGGAGGAGAAAAGGAUCCAGUCUAGCGAUC  
>P3899  
AGGAGGAGCCUGAGGAGGAGACAGGACAGAGCGUCUGGAGA  
>P3900  
GACUUACCAGAGACGCCGGGAGGGGGCCAGGAAGAAGAUG

>P3901  
CUCCAGUCCACGAGCCGGGCAGCUGCUUGAGGUGAGCCCC  
>P3902  
CUCCCUCGCCCCGGCACCCUGACCCUGGCGUGCCCGCCACUC  
>P3903  
GCAUGGAUAUGAUCUCCAAACGUCCUGGUCAGACAUGGCU  
>P3904  
GGAGCUGAGCCGGCGCUUGCAGCGCCUGUAUCCCGCGGUCA  
>P3905  
CCUCCAUUUCACUCACACUCACACCUUCUUCUCCAUCUUU  
>P3906  
GUCUCGCCCCGUGGCGGGUGAGCGAGGGUGCGUGGUGCGCG  
>P3907  
CAUCCUGGCGGCGCCGGGCCACUGGGAGGUAACGGGCUGGG  
>P3908  
UGAAGAUGACGAGAACAGUGAGAAUAACUGGCGCAAUGAGU  
>P3909  
GUCGCUCCGGAGGCGUUUACAGCGAGCACAAGAGCCUCCG  
>P3910  
GGCCCGCCCGCUACUGCGGGACGCCCGCCUGCCAGCUGCCC  
>P3911  
CGGCAGCGAUGGGAAAGGGCAGGAAGUCGAGACCUCAGUCA  
>P3912  
GGCCUGGAAUAUCUCUGGAUAUGAGCUUCUUCCAUUUUC  
>P3913  
CAUCUUCACUGCCUCCUUCAAGUUUUUCCCAUUUCAGCUA  
>P3914  
UAGAGUAGAGUCCAUCUUGAAGUCACCCCAAAGAACUAAU  
>P3915  
UCCACCAGCACGAGCGUCCCACCCGCGCCUGGGACCAUGGC  
>P3916  
CUCGGCGAAGCACUUCGUCAGCCUCGGGCGGAGGAUCGUC  
>P3917  
GCUCACAGUAAUCCCUGGCAGGUUCCCCUUCACAUGUCGG  
>P3918  
CGGGCCAGCUGCCAACCCUGAGUGGAUGCGGCCCUUCUCAU  
>P3919  
UAGCCAGUCUCUUCUCGAGACCAAACCUACUUCUCCUAU  
>P3920  
AAGCUGAGCGCUUAAGAGUGAAUUUGAGAUUAGUCAUAAU  
>P3921  
AAGGAGCAUGGCGUGGAGACACCUGAAAGUGAGUCCCGCGA  
>P3922  
CUCAAGGAGCCAAAUCCACACCUUGAAAGCGGCCAUUAUU  
>P3923  
ACUCCUCCGAGGACUACGUGAGGAGGCGGGAGCAGCACCUG  
>P3924  
GGAGGAGAUGGCGCUGGCCGAGGAGCAGCUGCGAGCCCGGC

>P3925  
GGUCAUCAAGAAAAGGAAAAGAAAGCCAGAGAGAGAGGG  
>P3926  
GCCAGCUCCGGCAUCGCGACACACCCCGCUCGCCAGGCCUG  
>P3927  
GCUGGUAGGUGUUGGGGAGCAUGGGCGUGUACUGGGAGGCC  
>P3928  
GACCCUCGCGGGGCCUCUGAGCGGCGCGGGCGGACCCGAG  
>P3929  
AACAGAAAGAGCUCAGUGAGAACAGCUAAGCCAAGCCACU  
>P3930  
CGCGCGGGGUCUCGUUUGGAGCGGGAGUGAGUUCUGAGC  
>P3931  
GCGGCCCGCGGGGGCGACGCAGCAGCCCGCUGUCCCCGCGC  
>P3932  
GCGGUACCUGCAGGCCGGCAAGUCUUCCAAACCGGUCCCG  
>P3933  
CGUUUCAUUGGGACUCCGCGAUCCUCCGGCUGCUCACGCUG  
>P3934  
GGCUGAUACAUGCUGGAGCCACCGUCGCCCAGUGUUUGUCU  
>P3935  
CGGCCGCGGGCUGGCGGGGGACCCUUCAGGCCCGGCCCGU  
>P3936  
CAUAUGGCUUCUUAUGGCUGACGCGCCCUUCACACACACA  
>P3937  
UGACGCCACGGGCGUGCUCAGGAGGCAGGCUCGCCGGGG  
>P3938  
GCCGUCUGAGCCGAGGCCACCAGGCUGCGGAACAUAGCC  
>P3939  
GGUGGGCGAGGACUACGGGGAGCCGGCGCCUGAGGAGCCGC  
>P3940  
GCCUGUGCGUGCACCUGAAUACCACGCCUGGGGUGGGGAAG  
>P3941  
CCAAACUGAAGGAGAAAUUCAGGACGGUGCAGAGAAAGAA  
>P3942  
UUGUCUCUCCCCGCGUCGGCAGCCCCUCGGUCCUUUCUCCU  
>P3943  
GCUUGCUGGCUCGCUCCUCACCUCCUCCCCGCAUCGCCA  
>P3944  
GUCUGGGUGUCCCGGGCCCGAUCUGGAAUGGAAACACAUG  
>P3945  
CUGGCGCUCCAAGAUUGAGGAGUUGGGUGGAGGAGUGGCAG  
>P3946  
GCGGAUCCAGCGCAGCCGGGAGACAGAUGCAGGGCGGCGGU  
>P3947  
CCAGCAGCACGAAUCCUGCACCCCCACCCGGUCACGGGCG  
>P3948  
AAAUGAAACGGGUGGUGGCGAGGCGUGGAGGUCCUGGUGA

>P3949  
GAUUCUCCGGAUAUGGCCGGAGUGUUUCCUUAUCGAGGGCC  
>P3950  
UCUUCAGGAUCUCAGGGGGGAUCUGAUUGGCCACGCGGCC  
>P3951  
UGAAGGCAGCGGAGGCGAGGAUGACAUCAGGGAGCUUCGGG  
>P3952  
AAAAGGAAAGAGGAUGGGAAAGGGGAGGGGGUGAGGGAAA  
>P3953  
GCGCCCCGAGCCUGCCGGACACCCCGGGCUGCAGCUGAG  
>P3954  
UGUUAGGACACGAGCAGAAGUAUGAAAACAAGGCUGGCAG  
>P3955  
CAGAAGAAGCUGGCGGAGACAGAGAAGCGCUGCGCUCUCUU  
>P3956  
GGUCAUCAGCUGUUCGGGAAGCCUGAUCCACGUCCCCGU  
>P3957  
GGGAGGUAGAAGAAGGUGCACCUCCACCCCAACCCUGCC  
>P3958  
GUGGGCUCCAUGCCCUCAGCAGGCCCAUGCCUUCAGCAGG  
>P3959  
GGGAAGAGGCGAGAGCGCGGAGGGCGCGUGCGCAUUGGC  
>P3960  
CCGCGGCGCCCGGAUCGGGGAAGUGAAAGUGCCUCGGAGGA  
>P3961  
GGAGAAGCGGCGACGGCGGCAGUGGAGUAACCGAGCCGGAG  
>P3962  
GCAUCCAGCUUAAGGACCACAUUGACCGAUCCCGGAAGAAG  
>P3963  
GCUCCUCCUUCUGCUCCUCUAUGCGCCGCUGCCGCUGGUGC  
>P3964  
UCGUCCAGCGAGGAGGUGGAAGCAGUGAGGACGACGAGGA  
>P3965  
CUCCAUCCAAACCUCAGCGAAGACAUCCAGGUCGGGUGA  
>P3966  
AGGAUCUGGGGCCGGUUCGGAGCUGCCCCCGCCCCUCGCCG  
>P3967  
UGAGGCCUGGCCGCCUCAAGAUGCGGGAGCUGUGUCGCA  
>P3968  
CUAGGAGCCGCGACCCAGUGAUAGCGGCCGUGGAGGGGCC  
>P3969  
CGGUUGACGCCUCCUCCGCCAGCUGAGCCCGCGGGAGCCCA  
>P3970  
GCACACACAGGCUUCCGCCACCUCCUUAAACCGCCGCUG  
>P3971  
AGACAGGAAGGCAGAGAGAGAGAGAGAGAGAAAGGAAGA  
>P3972  
GCUGUGUCCCGUAUCUCAAUAAAGAGAAUCUGCUCUCUUA



>P3973  
CACUCGGGCGUCCUCCACCAUUAAGACCUAACAUAGUCUG  
>P3974  
CCUCGGGUCACAGCGUGUGGAGGUCAUGACUGCGACGGCUC  
>P3975  
GCCGGCCCCCGCCGCGCCUGCCACCUGCCUCCGAGCCCGAG  
>P3976  
ACGCGGCCAGAAAGCGUUGGAAUCCUGAAUUGAGACGGCUG  
>P3977  
AGGAGGAAGUGGCAGCUUGGAGGCUGCCCCCAAGAUGGAGU  
>P3978  
CCUGGAAUCAGAUGGGCCCAACAUGACAGAGAAUGGCCUGG  
>P3979  
GAUCCAGGAGAUUGUGGAUAAAUCUGGUGUGGUGAGGGUUC  
>P3980  
GCGGGAGCCGGGCCGGCCCCACGGCGGCCUCCACAGCCA  
>P3981  
CGCUCGGCAAGCUCCAGAGAUCUGGCCAAUCACAGGACUU  
>P3982  
CCGGACCGGGUCGGAAACGAAGAAGGAAGCACCGAGAAAA  
>P3983  
GUUUUAUUUUGAGUGGUGCCAUUUUUCUUUCCCCGAAGCUUC  
>P3984  
UGCCCUCUGGAGCCCGGUCAAGCUCAGGAUCAAGGCAGACG  
>P3985  
GUACCGUGGGGACAGAGAGAAGUCAGGUGGGUGCAUGGCCU  
>P3986  
CAAGGAAAGCAGCGACGCUGACGGAGAGGCGGAGGAAGAAG  
>P3987  
CGCUACACCAGCCUUCGGCCAGGGCCUCCACUCAAUCCCC  
>P3988  
UCUUCUUCUAGGGCAGCCCGAAGAGUCUCCAACUCUCGAUG  
>P3989  
ACCUCUCAGCCAUUCUUUCAGCCCCACUCCCCUGGAUCC  
>P3990  
UCAGGUCUGCUACCGCUGCCACGGCCCCCCCUGCUGCCCCG  
>P3991  
AGGGUGCUCAGGCCAGAUGGAGCCUGAGAAGGAGCAGGGGG  
>P3992  
GACGAGAUGUGGGCGCAUGUACGUAGGAAUAAAUUCAUCC  
>P3993  
AGCCUCCUGCAGCGCUGGUCAGGUAACCUAUUCCUUGAAGA  
>P3994  
AAUGCCCAUAACCCAGCCUCAGACCCAUGGAGCCCACGAGA  
>P3995  
AAGCAGAAGAGAUGAGGGCAAGACUUGCUGCUAAAAGCAG  
>P3996  
CGUCUCCUCUCCGCAUCAAACAGUGAAACAUCUUCAGUGU

>P3997  
CUGCCGCAGCGGGCCUCGAGAACAGGCGAGCGCUGCGGGA  
>P3998  
AGCCGUCCUCCUGCUCCCGACUCUUCAUUCGUUCUGAGGA  
>P3999  
CCAUGUCGGCAGCCAAGGAGAACCCGUGCAGGAAAUUCCAG  
>P4000  
CCCCAAGCCCACGGCAGGGAUGUCACCCGGGGUGGCGAGG  
>P4001  
CCGCUCGGGCCCGCCGGGGAAAACAUGGCGUCUGCCCUGG  
>P4002  
GCCAACGGCCUGGACGCCCCAAGGGCGGGCGCAGAUCGCGG  
>P4003  
AGAUCUUCUCUAAGAUCCCC AUGGUAGCAGCAGAGGUGGGC  
>P4004  
CCACGCCACGCACGAACGGCAGCACCCCGGUGGCCUCCAUG  
>P4005  
AGAAGGUGGGGAGGGGAAGAAGAUGGCGGAGAAUAAGAGGC  
>P4006  
UACCAAAGAAGGUAACGAAUAUAUCACACUUCCAGGUUA  
>P4007  
CAGCCUCAGCUGCAGAAGGAAGAAAGCGCCGGUCUCCUGG  
>P4008  
GCUCCCUGAGUGGGCCGCGGAUGAGCCCGUGGAGAAGACGC  
>P4009  
GGGAAGCAGGGUCCUAAAUAACGUCCCCUCUUGGCUCUUGC  
>P4010  
GCUGCGCACCUGAAGAGGAACUGCUGGAGGAGGAGGAGA  
>P4011  
GGCUGUCGCUGACCCAGGAGAGCUGCCUGUCUACAUCAGC  
>P4012  
CCAUCAUCCUCUCCACAAUUUCUUGGUGACUCGGGG  
>P4013  
UGACGAGGAGGAAUAUGGCAAGGAGGAACAUGAAAAGAAG  
>P4014  
GCCUGGUAGACAGGCUAGCAUGGCAGAUUGGCAUCAACAC  
>P4015  
CGGCACGGAGGGCCUCGGGACCGCACAGACCCGGACAACA  
>P4016  
UGUCUACUACAACCUGGUGAAGGCCCCGCGUGCGGCGGCA  
>P4017  
CGGAGGGGGGUGAGAGGUACGUGAGGUUGUGGUACGUGA  
>P4018  
AGGUUAUGGAAUUGGAGGUGAUGGAGGCCCGUCUCAUCCGG  
>P4019  
AGGGAGAAACUUGUGAGGAAUAAAGGAAGUUAGGCUGAGG  
>P4020  
AGAAGUGACAGAGUAUGGAAAGGGAGAAAGAUAGGGAGAA

>P4021  
UUUCCGGCGCUCCGGGUGCGAGAGACAGGUCGGGCCCCCUA  
>P4022  
GAUGUGAGCCGCCCGGGCCGAGCUCCCAGCAGCAGCAGGC  
>P4023  
CGCGGGGUUGUAGACCUCGGACCUCAUGGCAGAGAUAAUUC  
>P4024  
UGGAGAUGAAAAGGAACUAGAGAGCAGCGAAGAGGGAGGCU  
>P4025  
CCUGUGUAACACUCCGGUUAAGAGCGAGCUCCUGUGGCAGA  
>P4026  
GCCGAAGAGGAUGAGGAGGGACGGUUGGACCGCCAGAUUGG  
>P4027  
CCGCCUCGUCCUGCGCGAGCAGUGGGGGCGGGAGUCAGUCU  
>P4028  
UCCCCGCCCGGGGGGAGAGAGUAGGGGCUCCCCGCCUG  
>P4029  
GACGGUGCACAUUUGAGCGACGCCAUGGUUUUGUGGAAGG  
>P4030  
CUUCCGCGCUUCUCCCCCAGAACGUGGGAAGCUGCCGCUUU  
>P4031  
GCCCCGCCGCCACCAGAACCAGCUCCUGGCCGCAGCGCCAU  
>P4032  
GACCAGCGGGUUCUCGGCCCAGCCCCUCUCGUCCGAACAUA  
>P4033  
CCUGCUGGUGGGCAUCCACGACGUGGACCGGGCAGAGCAGG  
>P4034  
CCCCGAGGCGUUCGGAGGCCAGGCGGGUUUCUGUCAGGCC  
>P4035  
CGAGAAAAGCUGGGGGCGGGGACGCCUGAGCUCACGCGGUC  
>P4036  
CAUGGAGCCAGAGCGUCGGGAUUCACAGGACGGCAGCAGCU  
>P4037  
CCGACGGCCCCGGGGCUGUGGAGCCGACUCCAGCUCUGGGGC  
>P4038  
CAUUUUGCAAGCCUGGAAGGAGCGCUGGAGUGACUACCAAU  
>P4039  
CUUCUGUCCAUCACUUCAUCCAUCAGGAUGCCCUC  
>P4040  
UCGUAGUCCAGUCGCUGCUCAGGAUUGCCGCCGGCAGGGGC  
>P4041  
GCGGCAGCGCGCUUCGCAAGACACCGAGGACGAGGAAUCUG  
>P4042  
UCUUUCCACCUCUCAGUGCAGGAUCCUUCUCACGUCUCUC  
>P4043  
GGAGAAGAAAGACGACGAGACAUAUCCGAUGGAGACAGGUA  
>P4044  
GCGGCGGCUACGGUGGUGGCAGUUCGGCGGGCGGGCGGC

>P4045  
GUAGGUGUAUGUCUGCUGCCACUCAGUCACCUUGAUAGGCU  
>P4046  
ACAGGCCCGACGAACCCCGCAAAAUCCGGAGCACCCAGCA  
>P4047  
AGACUUUCAAGGAACAAGGAAUGCAUACUAUGCCAAGAAA  
>P4048  
GCCAGUCAGAGGAAGGCGCAAGUCCGGGGCUGCCGCGCGC  
>P4049  
GGUUCUGCGCCGCCUCGCGAAAGACUUGCUUGCUGUGGGCG  
>P4050  
CGAGUUCUGGCUUGGGCUCCAGCUCUCCUCCUGGGGUUUG  
>P4051  
ACCCGACUCGGGAGAAGCUGACACCCGAGCAACUGCAUUC  
>P4052  
UCGGGUCCCAGGUCAGCCGAGAUUUCUCAGGUCCCUCGG  
>P4053  
GGCCUCCGCCACCGCCCCACUGGGGCCAGCGCACCGCC  
>P4054  
CCUCACGUCCUAGGUUACGAAGGGCCCGGCGACCCCGCCAG  
>P4055  
AAGGUAGUAGAGUCCCGGAAAGGGACAGGGGGCCCAAGUG  
>P4056  
ACUUGACUGAGAUGGCGCCCACUGCCUCCUCCUUCUUGCCC  
>P4057  
CUGAGGAAGCGGAGCUCCAGAGGGAAGGUAGGGAAGGGCGG  
>P4058  
CGAGGCCAUCCUUCGGGGCGAGGCAGUCAGGCACUCAGAAC  
>P4059  
ACUGCUACCCUGGGGACCCAACCAUCUCCAUAAACUACCUC  
>P4060  
ACAAGGCUGACACAGAAGAGAAAAGCUCUAAGGCAGAGUCA  
>P4061  
CGCAGGAGGGGCAGAACCCCAGGACUCCCCAAAAGAGCUA  
>P4062  
AAGAUGAUGAUGAAUUGGGUAGAGAGACCAAAGAUCUUGAU  
>P4063  
UACUCCUAUCUUGUUUCUCCACCUGUUCGGGAGUUGGAGAU  
>P4064  
GCCUCCGAGGGGCCAGAUCCCAAAGGGUAAAUCCCCUGC  
>P4065  
GUAGGGCUCAGGCGUUGGAAUUGCACCGACAGGCAGUCGC  
>P4066  
GCAGCAGAAGGAACUCCCCAAGCCAAGGAGAAGACGCCGC  
>P4067  
GCUGCUAUAUGGCAAGCACUAACCACUAUGCUIUACCGAGA  
>P4068  
GGGGCCUGAGGCACUGCAGAAAGUGGGCCUGAGCCUCGAGG

>P4069  
UAGCAGCAGUUUCCAGGACAACCGAAUGAUAGCCGUCUGC  
>P4070  
GCCUGCAUUGGAAUCUACAGAGAGGACAACUAAUGUGAGUG  
>P4071  
GCUGCGAGAUGGAGGCGAGCAGGACACCUGGGCAGGCGAGG  
>P4072  
GGCGGCGGCAGAGCAGGCCCAUCUUCGGCUCGCUUUUGGCU  
>P4073  
GAAGUGGAAAAAGGAGAGCAACUGCUCAGCGGUCUCAGC  
>P4074  
AGCUGAUACUGAAGUACAAAUAUAUCAAGAGGCUGGAGCCC  
>P4075  
CCACAGCGCUCGCCCCGGCUCAGGUGACAGACUCACCUCCC  
>P4076  
AGUCCGACUGAGGAGGCGGCACGGCGGGCGCCGGGGCGGC  
>P4077  
AAGGCCAGGCCAAACUUGCCAAUGGACUCAACACUUUGGC  
>P4078  
GGAGGACUGCAGAGAUGCCCAGAAACGAGCCUUUGCCGCC  
>P4079  
CCACGGAGCCCCGCCGAGCCACCGUUCUGCUGCUGCCGCC  
>P4080  
CUUGGGCGCCCCUGCCAGGGACGCAUUCUUCAGCAGCGCCC  
>P4081  
AGAUGUGCCCCCAUCCCCUGAAGGAGCUGGCUGUCUCAGUC  
>P4082  
GCACCCCGACUCGGGCUCGUAAGGGGGCUCCCCCAUCCUCCU  
>P4083  
UGUCAGAUACGCAUCCAAGAAGUCGGGUGGUAGCUCCAAAA  
>P4084  
GAAGGCCGUGCAGGCAGAUCAGGAGCGGGAGAGGCAGCGGC  
>P4085  
ACAGGGCGUCCAUGGGGCCGAGGCGCGGCUGCAAGGAAGGC  
>P4086  
UGGGAACAGCCGCCCGAAGGAGACCAUGAUUUCGGCCGC  
>P4087  
AGGCCAGAGUGGAGUGGGACAGGAGGUGCCGAGAGAGGACU  
>P4088  
CGAAGAGCAGCGAGAGGAGGAGGGGAGAGCGGCUCGUCCAC  
>P4089  
GAGAGCCUUCAUUCCGUGUAUUCUUGUUGUAGCUGCUCCA  
>P4090  
UGCCCCGCGGCCCGGCCCGCAGCGCCGCGCUUCCGCAGCUC  
>P4091  
GGUUCGGGCCGGGGUGCUGAAGGAGAAGCCCCUGUGGUUUG  
>P4092  
CUUGCUGGGUGCCCCUGAGAAGGGCGGGUGAUCUGAGGAGG

>P4093  
GUUCAACCAGGCCAUGGACGACUUCAAGACCAUGUUCCTCA  
>P4094  
AGGGAAAAAAGGACACCUAUCUCCUACAAAUGGUCUUUA  
>P4095  
CCGCUUUGAAAUGCAGCGGGAUUUGGUGAGUUUCCCGCUGU  
>P4096  
GCAAUCAUCAUCUCCACUGCAUUCUAAUUUCCCGAACACG  
>P4097  
AGGGAGAGGAGGAGAAGGGGAGGGGGAGGCUGGGCUCAGC  
>P4098  
CCAAAAGCAAGACGAGCAAGACACACACAGAUACUGAAAGU  
>P4099  
CUGCCAUUUCAUAGAUCAGUACUCUUGAGGAGCUAAUACA  
>P4100  
CCCGGAAAGAGACAGCAGGCACUGGAAAGCGAGGCCGGUGG  
>P4101  
CCUCCUUCUCCCGCGCCAGAGGCCCGCCGCUCUGGCCCG  
>P4102  
CCUCCUCCGGGUCGGGACGAAGUGAUGCCUCCGGGGAGGA  
>P4103  
UCUCCAGCUGCUGGGCCUGACCUUGGUGGCAUGACCGGC  
>P4104  
UCAUGUCAUUUCUUGUAAGUAAACCAGAGCGAAUCAGGGUG  
>P4105  
CCUUCUUCAUCCUUGAGUCCACCACCUUGAAAUGACCUCUG  
>P4106  
AGAGGAGGAGGAGGAGGAGAUCCACUGCUGGUACCACUGG  
>P4107  
GGUUACGGGGCUGGGUGCGGAGCGAGCGUGAUCUGAGUGGA  
>P4108  
AGGCAGCGGACUCCGCCAAUAUUAUCUGUCCAAGAUUGAAG  
>P4109  
UAUGGGGUUAUGUGCAUGUGGAGGCCAGGGUAAGGUGAAUGG  
>P4110  
GAUGAAGUAAUGGAUCACUAUGAACUACAGUGCUGGUGAG  
>P4111  
GUUUUAGGAAGGAAGACUUCAGAAGUCAUUGAAACCCUUC  
>P4112  
AGGACGGCGACGCCGAGGAGACCAGGAUUCUGAGGACGAC  
>P4113  
CAGUCGCCCUACAGCCGCUGAUUCCCCCGCAUCGCCUCCC  
>P4114  
AGGGUUAGAGACGGAGGUACAACAAGGUGAAAAGGAGAGAC  
>P4115  
GCCAUCAACCGCUCGCCGGGAGCCACGCGGGGCCUGGCGC  
>P4116  
CCAGCACGUGGAGGCCGUGGACAAGCGGCUGGAACAGAGCC

>P4117  
ACGGGGUCUCAGAAUCCUGUAGGAGUUGCGUUUGAAAAUCG  
>P4118  
GAGCUCCUCCAUAAGCGCCGAACCCAGGCUCCUAGAAGUCG  
>P4119  
UGAGAGGAGCUAGCCUUGAAAGAGUGAGUAGGGGCUGAGAG  
>P4120  
GAGGGGCGGGCCGGACGCUGAGCGGAGCAGCUGCGCCACGG  
>P4121  
CGGGGGUCUCCUGGGAUCCGAAGAACCUGCCUUUCCGCC  
>P4122  
GAGGAUGACUUUUCUGUCUAGGGGGUGAUGAAGAUGGUUA  
>P4123  
CUACCCACCGGAAGAUAGAAGACCCAGUAGGCCCUCCUGC  
>P4124  
GGCCAUUGGAACCUCGGUCAGCGGCCCGAUGUCCCCUCC  
>P4125  
ACCUCUCGGUGUUAUUGACGAUCACUCCGCCGCCUCCGAG  
>P4126  
GGGCUCCGAAGGUCAAGAAACUGCCUUGCUGGGCGUCCGG  
>P4127  
GCACCACGUCCACCGCCGCUACCGCCGCCCCACUGCCACC  
>P4128  
CUCCAUCACCCUUGGGCUCCAGUCUGCUACCCCAGACUUG  
>P4129  
GCAGCCCGCGGCCAGCACGAACUGGUUGAUGAUGACCUGGU  
>P4130  
CCCGACACCAGGUCGUGAGAAACAGCAGGCGCUGCGAGCC  
>P4131  
CUGGAAGACAUGGCCACUCCAGUCGGUGUUGAGCACGGCGA  
>P4132  
GACAACAGCCUUGCUGGGUCACCUGGAGGAGCUGCGCUCUU  
>P4133  
AGCUGGAGGUAGGGACAAGGACUCGGCACUGAUGGGGUGGG  
>P4134  
GGCUAGUAGGUAGGGUUAGUAGGUAGGGCUAGUAGGUAGGG  
>P4135  
CAGAGGAAGGCGAGGCAGGCACGCAGGAACUGGGCUUUUUA  
>P4136  
GACAACCCAUCCGGCUGGGACAGUACUGAUUCUCCAGCUCCU  
>P4137  
GAGAACAUCGACGGAGAAAACAGGAGCUGCUGGCUGACAU  
>P4138  
GCGCCCACACCACACACACCACCCAACACACAUGUGCCAGA  
>P4139  
AUGAUUCCUUGGUCCAUCCAGCAACGUCAAGGUGGUUCUG  
>P4140  
GGGGGAAGCGGCGAGUCAACAUGGAGCUUUCAGCGGUGGGG

>P4141  
CGCGCUGUGCUCUUCGCGGACUCUGAAUCAUGGCGACCAC  
>P4142  
GGCGGCCACGGACGCGGCGCAUGUCGGCGUCCACGGGCA  
>P4143  
GCGUUACCAGCGCUCUCUGCAGCAGCAGCAUGGCCUGCUUC  
>P4144  
CUUCUCCUGCUGGUCCAGCAAGCGCUUUUGCUGCACCUGCU  
>P4145  
AGCCAGGGUGGGCAUACCUGAGAGCCGCGCUGCCUCCACCU  
>P4146  
AGGAGGGUGAGGGCCCCAGCACGGCCACACUGGCCCCGGUG  
>P4147  
CGCCAGGCCCCGAGAGGGCAGCAGAAGCCCGCCAGGUAGC  
>P4148  
AUGUAAACCGAGAAGCCAUAUUUUUGGAAGCCAAACUCCUU  
>P4149  
CCCCGCCCGGAAUCUGUGGAGGGGCCGCUUAGCCUUGGGA  
>P4150  
GGGUGCAGGCGGGUCCUGGGAGUCCCCGGCGAGCGCGGGGG  
>P4151  
CCAUGGCGACCUCAGCCCAACCCGACGCGCGGGCGCUC  
>P4152  
UCCACCAGGCCCCGCUCGCCACCCGGCACCUGGCCUCGCAG  
>P4153  
CCGACCCACCGCGAGCCGAGCGCACAGUCCUGGGCGGGA  
>P4154  
GAUACAAGAUGGUGCAGGCCAUCAAUAGGGUGGACGAGGUG  
>P4155  
CGGGGGGCGCGGGGGCGGAGGCCCGGGGGCGGCCUCGGCU  
>P4156  
GCUGGGAGCGGCGGGGCGACAGGAAAGCGAUGGUGAAAGCG  
>P4157  
CGCGGGCGGCCCCGAGGAGGAGGCGGAGGACGAGACACUGG  
>P4158  
CUGUGCCCCACGCUUCAAGGACUUCAGAGGAUGUACAGGG  
>P4159  
CUGGGUAGCAGGGUGGUGUAUAGCGGCAGCGAGGGGCUCG  
>P4160  
AGGGAGGUGUCCUUUUUCCAUUCUGUUGCAGUUUCCGAACC  
>P4161  
UCCAGCCGUUAUUGC UAAACAGGACGCUCUGAUCCAGGCG  
>P4162  
UCCUGCUCAGGCUUCGAAUAAGCUCACCAUCCACCUGACC  
>P4163  
UGGAGCGCCUCAUCACGGACACCGACAGCUUCCUCCAUGAU  
>P4164  
AGGCGGCUGCAGCGGCGACAGACAACGACAGCGACGGCU



>P4165  
GGAAGCGCAGGAGUCAUGAGAAAUGAUGGUUCAGGCAGAGA  
>P4166  
UGGGCUGGUUGUACAGCCGCAGGAUCUCCUCCAGGCUCAGC  
>P4167  
GCGGUUAGUCCUUGCUGGCCACCCACUGCGACCAUGUUCG  
>P4168  
GCAGGACGGCGGCGAGGGCC AUGUGGGCACCGUCCGGAGCU  
>P4169  
GAACAGAGCAGAGAGGUGGCAGGACGGGCAGCAGGCUCCGC  
>P4170  
CGAGAGCCCCGGGAGAGUGAAGGGCCGGGGAGACAAGGCG  
>P4171  
UCGCGCCUCCGAAGCACCC AACUCGCGCGGGCCCCGAAGC  
>P4172  
GGGCAGGCUGCGCAAAGGUGACUUAGGGAGACCUUGC GGGC  
>P4173  
CCAGCGCCGUGGCGGGCGGAGGCGCAGGUAGGGACCGCCG  
>P4174  
CAAUUUCUUUCAGAAUGAGGAAAUUGAAGCAAUGGCAGCCA  
>P4175  
CGCCAUCGCCUUGUUUCCCCAUCCCCCGCCAUGGCCGAGGA  
>P4176  
CGGCGUGAACGUGGUGUCGGAGGGAUGUCAGCCUUCUCUGA  
>P4177  
ACUACCGUUC CCGGCAUGCC AUGAAAUUGGCCUCGGCGCUG  
>P4178  
UGGCCCGGCGCUGGGGCUUCACCGCCUCGGCCAUAGACCCU  
>P4179  
GCGGCUC CCGCCACUUUACUAGGAACUCCUAGCGGGAGAUG  
>P4180  
CGCUGCCGGGGCUUGUUC CAGGAGGAGAAGGCGGCGGUGG  
>P4181  
AUUAGCGGGGGCCUUUCUGAGGACGGCGUACGGAGUGUGG  
>P4182  
CGAGCUGCAGGCCGGACCGGAGCCGGAUCUGUACCCGCUGA  
>P4183  
CUUGCCCGGAGCCUGAGAGGAUUAUGAAAACGUGGCGAGCG  
>P4184  
CCCGCGAACCUGCACAGACCACUCGGCGGCGUCCAGGCGG  
>P4185  
CCCCGGCCCCGGCCACGGCCACAGACGCCGCCGCCCGGCC  
>P4186  
AGAAGACGAUCUGGGAGAGGAAGGAGAGAUGCUCAGGAAGG  
>P4187  
UCAACUGUGAUUUAGAAUAACAUCCACCUCUCAUUUUCU  
>P4188  
CUGAGUCUCACCCACCUAGCACCAUGCCUGCAGUGGCCUG

>P4189  
CCGGCCGUCGCGCCGCAGCACAGCCGUGGGAGCGCCUCA  
>P4190  
UCAUCGUCCUCAUCCGAAUCACUGAGAAAUGGAUUCACGCC  
>P4191  
CCUGCACACCUGGAUCCAGGAUAACGGAGGCUGGGUAGGUG  
>P4192  
CCGCGCUUGCUGCUGGUAACAGGGCCUUGCCUAGUGGGCCU  
>P4193  
UCGUCAGCACUUUAUUAUGAUGGAUAGUGAGAAUAAACC  
>P4194  
GGUGGACGACAUCUUGGAGAGGCAGCGACGACAGCGACA  
>P4195  
CGUGCGGUGACAAGGGUCAGACUGGCGGCUCCACUGCAGC  
>P4196  
GGGCCCGGCGCGGGGGCCCAAGGUGUCGUUCUCGUGCCGCG  
>P4197  
AAUGUGGCAGUGGAGAUGGUAGCCUCCAGCCACCCAGGAAG  
>P4198  
UAGCAAGGGCACUUCAGCGAAGGCUCGCGGCUCGAGGGACU  
>P4199  
CGUACGAGGGGCCUUGUUGAACUGCGUGGAGCUCAUGGCU  
>P4200  
CUCGGCAGCCAGCCCUGCCCAGACACCAGCUAUGCCCCCGU  
>P4201  
CACCACGGAGCGAGAAGCCCAGAUAGACGCCCCGGCGGCC  
>P4202  
UCCUGGGGCGUGGUCGGCACAGAAGCAUGGCGGCCACCUCU  
>P4203  
CAGUUCAGAAUGCAGCCCACAGCCACCAUGGCCACAGCCGC  
>P4204  
GCGCUGCUCCGCCGCCCGGACUUGGCCGCCUCGUCCGCCA  
>P4205  
CCAUGGCAUCAGAUGAAGGCAACUUUUUGUUGGAGGGCUG  
>P4206  
GGCCGCGGGCGCCGCCCCCACGCGGGGCUGCAGUUCUCGC  
>P4207  
CCGCGGCUGUGGGGAGGGCGACGGAGCGGGUGACCUUCCGG  
>P4208  
GGCCAUGGACGGCCUGAGGCAGCGCGUGGAGCACUUCUGG  
>P4209  
CCCCACCCGAAAGACCCUCCACGCUCGUCCUCUACAGAGUC  
>P4210  
GAAGGAGCGCCGGGUGGCCAUUAACGCCCGGGAGCGGCUGC  
>P4211  
GCAGUCA AUGGCCCGGAAGAAGCCAGUGGAGCGUAGCAUGG  
>P4212  
GGCUUCCGUCGGGGUUCGCAGUGUUCAUCUUCUUGGGGCG

>P4213  
GAGCGCAGGGCACGGUGGUCAGCGUGCAGCGGGACGGGACU  
>P4214  
GCUCCUCGCUGCUGCACUCAAGUGAUACUCCUCUCAGGG  
>P4215  
GAGCAUCUUGGACUUGUCCAAGUACAUCGACAAGACGAUCC  
>P4216  
AACGAAACAUAACACACAAGCGCCCCGUGCCCCCAGUGA  
>P4217  
AUGAAGCCGAGCGGCAGACAAGACGCCUUCAGCAUGUUCUC  
>P4218  
GGGGGAGCGCCAGCCGUGGCAGCCCCGGGGGCGGAGGUGCC  
>P4219  
GGUCUUUCUUUAGGAGCGAGCGGGUUCGCCAAGCUCCUG  
>P4220  
GCCUCCGGGACGCCUCACCGAGCUCUGGAGACUCAGGACCC  
>P4221  
GUCCUGGUCCAUGGCGAGGCAGGGCUCGGCCCGCGGCAAGG  
>P4222  
GGCCAGUGGGCUCGCCGGCGACGGCGCGCACGCUCGUGGUC  
>P4223  
CAUGGAGCUGGAGGUACCGGACGAGGCGGAGAGCGCUGAGG  
>P4224  
GGCGGGGUUAGGAGCUCCCAGGCCCCCCAGCCGGCCCACG  
>P4225  
GCUCCCCGCUCAGCCACGACAGAUGGUUUUCUCUCCAGAAC  
>P4226  
GCACCCCGGCGCCAGGCUCCAGCAGCGCGUCUUUGAGGAGC  
>P4227  
CUUCUUCAGCCCCGCCACCGACAUGCUGCCGCCCGCCGCCG  
>P4228  
UCUCGCCGUCAGCAUGCCACAGCCUUCAAGCCCGGGGACU  
>P4229  
CCCGGCUCACCUCUCUCUCCAGCUCGGCCUCGGGCUCGGAG  
>P4230  
CCCGCGGGCCCCAGUGAGGCACUUUGUCCCGCCAGCGCUG  
>P4231  
CAGCGCCUCCUCUGAGGGGAAGUGAGCAGGCGGGGGCGGCA  
>P4232  
GCGGUGGUCUGGCCGGGGAAAGUCUGCACGAUAUCGGUCCU  
>P4233  
AAGAUCUGAUGAAAUUGGC AUCGAGUUAGAAGCCACCAGC  
>P4234  
CGUGUCCUUUGAUAAAGGUCAAGGAGCCUCGGAAGUCAAGAG  
>P4235  
CCUGCCGGGUCCCCGACCGCACCCCCUCCCGUAGGGCACGG  
>P4236  
GCCGCGGCUGCUCGCUUCCC AAAACCCCCGCCAUUGGCCCC

>P4237  
UCUUUGUGUUUCAGAAGGAUAAAGGACAAAAGGUAAGGGGC  
>P4238  
AGCUGGAGCGUGAGCAGGCCAAAAGCUCCAAGGACACCUCG  
>P4239  
CGCAGCGGCCCGCCGCAGCGGACACUCCAGAACGGCCUGGCC  
>P4240  
GGCCUUCGAGGACAGCGAUGAUGGGGACUUCGAGGGCCAAG  
>P4241  
CGGCGGCUUCCCCGGGAUCGAGGGACGCGCACGCCAGAGGA  
>P4242  
CGGCCGCGGGAGCCCCGCGGAGUGGGGGCAGCGGCUACUUC  
>P4243  
CCGCCCGCCCGCCGCAGCCACCACCGCACCCGGUCCCCGC  
>P4244  
GCUGGACCUGUUGGACAGAUUGUAAAAGUUCGUGAAAGAAC  
>P4245  
GAGGCGGCUGCGAGAGUGGCAGAGGAGCUGGCGGAGAGCGG  
>P4246  
GUCUUCGAGUUUCGACCUCGAUCCAGAUGUGAUUGGCCCCG  
>P4247  
UUUACUAUCACGUAGUAGUGAGUUAUGGGGGCUCUAUGGC  
>P4248  
CACCUCGCACCCCCACCCUCAGCCCGGCCCCACCCUGCU  
>P4249  
AGGUCUUGGGAGAGGCUGGGAGGCAGGAGAGACUCCCCAG  
>P4250  
GACCUGGAGCGCUCGCGAGAAGCGGCAGCUAGUGCGACUCC  
>P4251  
GCUCUGCCCCUGCUGCACCUAGCUCCGCACCCAGGACUCCU  
>P4252  
GCCCCUCGGCGGCCUGGGGCAACCGGUACUUUCGCCACCC  
>P4253  
GGGCAGACUCCACCACCAUAAGGCGAAACCGCACUGACGG  
>P4254  
GCUCGUGGACCGACGGGCGCACCCAGGUAGGGGGCGGCUG  
>P4255  
CGAGGACGAAGAUGGAGACGAGAAAGUAAAGGCGGGUUAUU  
>P4256  
GAAA AUUGGGUCUGGGGGUUAGUCCUGGGGUGGAGGUCUGG  
>P4257  
UCUUGAAGUUCUUCUGCCACAUAGCAACCUGGUGCAGUAUG  
>P4258  
AAGGACCUUGUGGGUGAUUAAGAGGACUUCGCUUUUGCUCU  
>P4259  
AUCGCUACGGGGACCGAGACAGCAGCAGCGACUCCAGCUCC  
>P4260  
GGCCGCGGCGCCAUGGGCAACCGCGGGAUGGAAGAGCUGA

>P4261  
GUCUCUGUCCUCAGCGAGGGAUGCGGAGACGCCCCUGAACG  
>P4262  
CCUCGCAGCUGCUUCUCGGCACCGUCUUGC GUUCCAGCAG  
>P4263  
GGGCGUGGGAGUGAGGUACCAGAUUCAGCCCAUUUGGCCCC  
>P4264  
GCUGGCAACAACGGUGCCUGAGAGCGCAGAGCCUGAGGCAG  
>P4265  
GGCCUGAGGGGCCUGAACUGAUCUCACUUGGCUCCGAAAGC  
>P4266  
AAAGCCGCCUCCCAAGAAGAAGAUGACAGGCACCCUCGAGA  
>P4267  
CAGGGCGCGGACAUGGUCCAGGGGCCUGCUGAGUCCAGGC  
>P4268  
GCAGCGGAUCAUAGCUGCUAUGGGGCUGAGA UCCAGGAAU  
>P4269  
GAGAUGCUGGUACUAAAGGCACUGCCUUGCUCACCCAGUA  
>P4270  
AGCGACGCGGCGGCCCGGGAUCCUCACACAACAUGCAACU  
>P4271  
CACCACCUUGUCCUGGGCGUACAGCCCCUCCGGCAGGGCCC  
>P4272  
CACCCACCCAGCCGGCCCCUAGAUUCGCGUCAGCCCCAGAG  
>P4273  
UUCUCUAUAGGGGUCCUUCAAUCCAGCUCUGCCUGGCUGG  
>P4274  
CCGCCCGGCACAUCUCCCGGAGCCGGGGCUGGGGGGAAGCG  
>P4275  
CCGCAUCGAGGGCUUCACCAACGUCAAGGAGCUGUAUGGCA  
>P4276  
GGGACUGGGGCGGCGGAAAAAGGCGCCCCUCUAGUGGAAA  
>P4277  
GCUGGGGGGCAAGUCACUUCACAUCACAGGGCCUCAGUUUC  
>P4278  
GCUGCCUAACUGCGCGGCACAGCACAGGCUCCCUACAGCGC  
>P4279  
CGGCGGCCGCGGGGUCUCCAUGAGGUGGUACC UAAGAGAG  
>P4280  
GGCCCAACCCAGCCAGCCAACGCAGCCAGCACCAACCCCC  
>P4281  
GGGCCGCGUCGAAGACAUGGACCAGGGCUACGGAGGUUUGU  
>P4282  
CCGCCACCGCCGCCGCCAAGAGGAGGAGGAGGGGCGC  
>P4283  
CUCGGGUGUGUGUGGAGGGGACCUGUGGUUAGCAGCAGCU  
>P4284  
GGAGGGGUCCAGGAUCCUGCAGCUGCCGGCCCCGGGGCCC

>P4285  
UUGUCCUUCUGCUUCUCCAUAAGUCAUCUUCUCAAAACUCGGG  
>P4286  
CUACUGGCAGCGGAAGCUCUACCGGCACCAGAAACAGAGCA  
>P4287  
UGGACUCGGAGACGUCGGCCAGCACCGAGAGCCUGCUGGAG  
>P4288  
UGCCAUCGCCUCGCAGCGGGAUAGCAGCCGCACCAGGUUA  
>P4289  
AGUGAGUCGGCGGCUGAUUUAGAAGGAGGUUCAGGCUACGG  
>P4290  
UAGGCAGAUUUUUGAAAGGACUGCCUGUCUACAACAAAAG  
>P4291  
CGCAGCCCAGCGUGUAGUGACGAGCAGCGCGCGGCCUUG  
>P4292  
GGAAGAGGAAUAGGGGUGGCAGUGUCAUUGGUGAAAAGAC  
>P4293  
UUGUCCAGCCUUGAUUGGAGCAGGUGGGCUAGGUGGCC  
>P4294  
CUGUGUUCACCAUGCUCAGGAUGCGGCCGCAGAAGACCUC  
>P4295  
AGUGCACCUUCUCGGCACCCAGCCACAGCACCAGCCUCCUG  
>P4296  
AGAUCGCGCUGCACAAUCAGAGCAGGCGGAGGAGACGGCG  
>P4297  
GGAACCGGCCCGAGGGCCUACCCGGAGGCACCAUGAGCGU  
>P4298  
GGCUGGUUUUCUAUGAACGAUUCGGCCUGGGAUGCGGGC  
>P4299  
UUUCUUGUAAUACAGCAUCAAGUCUCCUGUGUAAUUCGU  
>P4300  
GUGAGCUCGCCUGUGGCCCCAGCUUCGAGGACGCCUGCUGC  
>P4301  
GCAGCUGCCAGUGCGUCAUCAGAGAGCGCCGGAAGCGGUCC  
>P4302  
GCGCAAGUACCGCAGCCAGCACAUCAUCCCCUGGAGGAGG  
>P4303  
CGGGAGAGAGGUGGGCAAGGACGAGGGCGAGGGCACGGCCG  
>P4304  
CCUGCCAGCCCAGCUCACCAAGUCCAAUGCACCUGUGCACA  
>P4305  
GGGGAGGGAAGAGGCCUCCUAUCUACUCCUCUGCCCCAGUC  
>P4306  
CCAGUUCUUCAGCAGACUCAACUAUCAUGGACAUUCAGGUC  
>P4307  
GGCAGGAGGGCGCUCCGAGACCUGAAGUCGUCGUAGUGGG  
>P4308  
GCCCCAGGCGGGGACGGCCCAGGAGCGGAGGAGCAGACAGC

>P4309  
CAUCUCUUCGACCGCCAGCAACCCAGUUCCTCGCUUCCU  
>P4310  
AGCUAAGGCACCCAGCCGGAGGAAGUGAGCUCUCCUGGUG  
>P4311  
AUGGAGGAGCAGGACGCCAGAGUCCCAGCCCUGGAACCGUU  
>P4312  
ACCAUUCUGGCAGAAGCGAAUACCCACGAAGCCCGGCUCG  
>P4313  
GCCGCUCCCGGGCCUCCCGCAGCGUCCGGCUCGGAGGGCG  
>P4314  
GGGACGCAGACAGGGUGUGCAGGGCCGUAGCUCGGGCCUGU  
>P4315  
CGGCCUGCAAACCUGGCCACUCCGCGCUCUUUCCUCA  
>P4316  
CUCACCUGCUCCCAGGUCGAACUCCAUGGCGGUAAGAGAAG  
>P4317  
CCAGGUGCCCGCUGGGCCCCAUAGCCCCGGCUCUGGGCUGA  
>P4318  
UCGCGGGGCGCCUCAUGCCCAGACUUCAGGGGGCUGUGCGU  
>P4319  
UAAGGUCCAGUUCUUGGACCUGCCGGCUCUCCACUACC  
>P4320  
CGCGGCGAACCAGUCGUACCAGUACGGCCCCAGCAGCGCGG  
>P4321  
ACGGGACACAGUGGUUGGUGACGGGACAGAGCGGUCGGUGA  
>P4322  
UUGGGAAAAGCUGCCGACCGAGAUGAAUGGUGCGACAGCGG  
>P4323  
CUUCCCUCUGCCUUUACCCAUAUCCUCCGCACCCAUCAUC  
>P4324  
GAGGAGUGGUCACCUGCCUGAGGGCACUUCUGUCCCACCAG  
>P4325  
GCAGCAGUGAGAAGGAGGGCAGUGAAGAUGAGCACUCGGGC  
>P4326  
GGAGCUCUUCUCGCCCCGCCACCUCAUCUCAACCCACUUUC  
>P4327  
GGCAGUCAGAUCCAUGGUGUACGGUUGGCCAUGAGGGGUG  
>P4328  
GGGUUUUCUUCUCCAGGGAACCAGCGGGGAAACUGAGGCU  
>P4329  
GUCAGUCAGGCUGGAGCCCCAUCCGCAGAGAUCCCGCA  
>P4330  
CCCUCAGUGCUGCUUAGGCUAAGAGAGGUGGGGUGGAGGGA  
>P4331  
CUUUCUUGUGUUUCCCGGCAGCGGCAACGGCGCCGGCAGC  
>P4332  
AGUCGGGCCUUGCCACGGGGACAGAAAACAGAAGAGAAAUG

>P4333  
GGGGCACUGUCACGGUGGGCAUCUUAAAGACACCCUCACCC  
>P4334  
AGAGGUAGCCACCCACAACC AUCAGGAAACGGCGGCGGCA  
>P4335  
UGUGCCUACAGAUGUGGACGAGUGCCACCGUGCCGCCGC  
>P4336  
AGACGGGGCGGGCACCAUGACAAGUUACGGCAGAGCCUGC  
>P4337  
AGGAGGAAAAACGUGACUUUAGCCCUGGGUUUCUCCAAAUC  
>P4338  
CGGGGCUGUAGCCGGAGUGGAGCGGCUGCCAGCCGAGGAGC  
>P4339  
GCGCAGGGCGGCUGGCACAAACGGCGGGCGCCGGGGCCGGAG  
>P4340  
CGCUGCAGCGCUGGUCACCAAGGGGUGCCAGCGAUUGGCAG  
>P4341  
GCCUCGGGCCCUGGUCCCAGCAGCGCCAGCGUCAGCAGCA  
>P4342  
ACAUCCUGGCUCAAGCGCCAAUACCAGCACCCCCACCGUC  
>P4343  
GGAGCCUGCUUGGAGGAAGAGGAAGAGGAGGAGGACAGUG  
>P4344  
ACACAGGGCAAGGGUCACCAAGUCGGGGCCUAGGGACUCCU  
>P4345  
AGGUCGCAGCCAGGACCCGAGGGCUGGACCCUGUCCAUAU  
>P4346  
UGGGGAGAGUGCGGAGCCGAGCGCGGAGGCUUCGGUCCG  
>P4347  
ACGGCUCUUUUGCACGGCCACCCUAACGCUGCGCCCGCUC  
>P4348  
CUCUUGGGGCUCCAGAUGGAGUGGAAGGGUGCUUGGUGG  
>P4349  
GGGACCUCAAGUGAGGAGGUAAGAAUGGCGUUGAGAGAC  
>P4350  
CCCCACCCAUGGCCCCGACAGAUGCCUUUCCGCCCGCGGU  
>P4351  
CCCAGGGUUUGCCUCCCAGAUUGGGCCUACAAGCCAGAGU  
>P4352  
CCGGACCAUGUAUUCGGCCCACAGGCCCCUGAUGCCCGCGU  
>P4353  
AGAUCAAGUGUGAGGAGAUGAGGCUGGGGAUAGUCAGGGGC  
>P4354  
GCACGGGGGAAGGGGGCCUCAGGGGCCAGGGAGUAGUCGAU  
>P4355  
GCAGCUCAAGUCACUGGGGGAGCAGAUGGCAGCCGAGAGCC  
>P4356  
UCUACUUGCAGAAGGACAGGACAAUGGGGCGGAAGAUUCUG



>P4357  
UUCGCCUGGCCAGAAGGAUGAGGUAGAGUAUGGGGUCCGAG  
>P4358  
AGCGGGGAAGGUCCUGGGAAAGCUGGCAGCGAGGGUUUGCA  
>P4359  
AGCUGCAGGGGUCCUCUUC AUCUGCUUCACCU GCGCCCGC  
>P4360  
CUGUGGAGAGCUGGCCGGGGAGGGACGCUGCUCAGCUGCUG  
>P4361  
AGUCCUGUAGCGCUGUGGGAAGAGGGGCUAUGCGCGUCGGG  
>P4362  
UCUAAUCGUCCAGGGGCAGGACAGGAAGUACAGACAGAGAA  
>P4363  
CAGAGAUGGAAGAGCCGGGAACAGAGAAGUGUGGGGAAGAG  
>P4364  
GCCGAUCGGCUGGGCGGUUUAGUAGGUGCCUGUGGGGCUCC  
>P4365  
GGACUACUGGUGUCCAGAAGACGGGGUCCCAUUUCCCAAC  
>P4366  
GGCUUCCAUCGGUUAUACCUACGAGGACAGCACGGUGGCCA  
>P4367  
CUCCAGCCCAGACCUCACCGAGUACAUGGCCUUCUCCUCCU  
>P4368  
UUGCACUGGGGUGAGCGUCCAGAGCUGGGGCCGGGGAGAGG  
>P4369  
CCACCCACAGGUCUUUGCACAGAACUUGAGGACAUC CAGC  
>P4370  
GGGGUCGGGGUCGUGAGCCCACAGCUCAGCCACCAUCUCCG  
>P4371  
GGUGCCCCAACACAGGCACAGCUGGUGACGCAGAACAGGU  
>P4372  
GGCACCAUGGACAGCGAGGCAUUC CAGAGCGCGGGACUU  
>P4373  
CAUCAAGCCGCUGAACGAGGAGGCGGCAGCUGAGCUGGGCG  
>P4374  
AGAUGUCUAUUGCCGAGUAGAGUAAUAUAUACCCAGAGUAU  
>P4375  
CCAGCUCGUCUGGGAUCAUCAUGGGCACAGGGCGGCCCCUC  
>P4376  
GCUCCAGCAGCAGAGGGUGCAGGGAGAAUCUCGCUUGCUC A  
>P4377  
GCCUGCAGCGCCGGGACCGGAGGCGGAGGCAGGGCCGGGCG  
>P4378  
GGAGAGGGAGAGGGGGAGGAAGAGGAGGGGGCUCCCACUCC  
>P4379  
UGUACACAGAUAGAGGUGGCACUGGGCUGGGUCGGGGAGGG  
>P4380  
CGUCAGUUGAACCGCUCGCGAGGAGGGUUGC UAUGGAGAA

>P4381  
GCGGGUGAUGGUUUCUGGGCAGGUGCUGGAGCUGGAGGUGG  
>P4382  
GCUGGGCCGACCUGGGGGCCAGGAGCCUGGGCGGCCCCCC  
>P4383  
GACUCAGGGAAGAAGGAGAAAGAGCAAUCAUGCAGCUUGGG  
>P4384  
CGCAGUUCUGCAGGAAGGGGAUCUGCCCCAGCACUGAGCCG  
>P4385  
GGAAAGGGCAGGAGAAUCUAAGACGGACCUGGUGCGGCGG  
>P4386  
GGGACCGUGGCCGGGGGCGAAGGACCCCCGGGCGCCCCCGC  
>P4387  
GGCAUGGGCAGGGGCAGCCGAGGCAGGGGCAGAGGCUCUAU  
>P4388  
CAAGAGGAAGAAGGAGGAGGAGGUGAGCCCCAGAAGGAG  
>P4389  
AAGAAAAGUGCUGGACAGGAAGGGAGAAUUCUGACGCCAAC  
>P4390  
CUCUCAAGACACCCCCUCCAGUCCCCUCGGCUUCUGAUUC  
>P4391  
GGAGAGCAAGGGAGGGAGGAAGCGGUGAGAGAGGCGGGGG  
>P4392  
AGCUCCUCCCGCAGGCGCUGAAUCUCCACCAGCAGCUCCUG  
>P4393  
AGGCUGAGAGGAGUAGGAAGAUCAGGAGCUAGAGGGAGACU  
>P4394  
UAUCUUCUGGGACCACACAGAGCCAAGGGACAGAGAGAAG  
>P4395  
CCACGCUCUGAUCACCCCGGAUCCUUGGAGCCUCACACCA  
>P4396  
AAGAUUGGAGAGAGAGAGAGAGGGAGAGAAUGAGUGAGAGA  
>P4397  
GAGCCCGACGCCUGAGGGUGAGAUGAACGCGCUGGCCUCCC  
>P4398  
CAAGGAGGUGAGCAUCUUGGAGCCUCGGGCACCUGGAGGG  
>P4399  
AGGAGGACGACAUGC GGGAGAUGGAGGAGGAGCGACUGCGC  
>P4400  
GGAGUUCUCGCAUCCACUCAGAGGAAGGAGUUUGGGGACA  
>P4401  
GAGGCACCGGUCCAGGGCCAGCUCGGGUGCCUCCCCCCCC  
>P4402  
GUGGACGCCCCGGAGUGGAAGCCGAAGCAGGAGUUGUUGU  
>P4403  
CACUCCCUGCUGCCUGUAAUAUUUGUUUAUCCCCAGUU  
>P4404  
GUCCCCAGCGGCCUCGGGCUAUGGGACCCAGAACAUCGAC

>P4405  
CUCACAGGUGCCUCCAUGGCAGGCUCUGAAGAGCUGGGGCU  
>P4406  
GGCGGUCGGAGGCUCAUCCC AUUAGCCAAGGUGGCUACAAA  
>P4407  
UCAUGUCCUGCAGGAGGUGGACAUCUAUACCGUCAAGGUGG  
>P4408  
GGGAGCUGCCGCGGGCCACAAGGGGGGCUGCGGGCUCCACC  
>P4409  
CAGUGCGAUGUCGUGGAGGCACGGCGCGCUGCCUCCGCCA  
>P4410  
CAUCCACAUCAGGACAUCCCAGCUGGAGUUAACCUUCAUC  
>P4411  
AUCCUCAAAAUCACAGGAGGAGCAGGCCCAGACCUCAGAG  
>P4412  
CUGCCUGCGUAGCCCCGGCC AUGGCUCUGUAGCCUCGACCC  
>P4413  
GUGUGGUCACGGAUGGUGUGAGCACUCCAUGAACCCCUUC  
>P4414  
ACUCAGAGAGGGGAGGAUGGAGAGUCAGAGAGGGGAAGAUG  
>P4415  
AGUUGGGCGAGGGGCCAGAAGUGGAAGAAGUUUAGGGAAG  
>P4416  
CCGUGGAGCAGCCCCUGUAAACUGGCUCGGGCGCCCCACG  
>P4417  
CGCGCCGCGGUGGCACCGUCACUCCACGCUAUCGCUUCCU  
>P4418  
GUCGUCUUUGCUUCAGCCGCAGUCGCCACUGGCUGCCUGAG  
>P4419  
AGAUCUGGUGGUGGAGACGGAUUAAGCCACACUUGGAACAG  
>P4420  
CUGCCGGGUUCUGGGGGUGCAGGAGUCCUUCUGGGCGGGGA  
>P4421  
GGUCCUGAACAGGCUCCAUCAGGUGCAGAGGAUAACUCGGA  
>P4422  
UUGCGAACGGCUUAACCUACAGAUUGAAGAGGUCGGAAGCU  
>P4423  
ACUCUUUAUUGCCUCUGAUCACUCCUUUCCCUUCCUCCAGC  
>P4424  
GGCGCUCCCGGAGGGCCUGCACCGCCUCGGCUCCCCACACC  
>P4425  
AGGACAAGGACCGCACGGAAAGCUGCUCAAGGAGGUGCUG  
>P4426  
ACAUGAACAGAACAUGGCCAAGAAGGAUCUGGGGGAGCAGC  
>P4427  
GCCGCAGCGUGGUCUCGGUCAGGGCCUCGCGAAGCCGCUCG  
>P4428  
GCUUCUUACGCUCGGAGAGGAUGCGCACCUUCAUCUCCCGC

>P4429  
GGAGGACGAGGAGGAGGAGGAGAGACGAGGAGGGCAUUGGCU  
>P4430  
CGCCAGGUGAGAAGGGGAUAAGAGUCGGGCAAGCAGCUUCA  
>P4431  
GAGCAGGAGCAGGUGAGGGCAAGGCAGGCGCGGGGAGCCUG  
>P4432  
AGGGGCCGUUCCGGGCUCGACCCCGCACCUUCCGGGUAAG  
>P4433  
UUGGGAAGAGGAAGAGGACGAGAUGACGACGAGGAGGACG  
>P4434  
UGCCGCUCCCCAGAACCUGGACCUUCCUCCAUCCGGAUC  
>P4435  
GAGGACCCCUUCCCGUGGC AUUAGAAGGGGGAGGGGUGGC  
>P4436  
ACUCAGCCGAUCCGCACUCUAGCCUCUGUGUAGAAGGAACA  
>P4437  
GCGACCAGCGGCGUCGCCGACCCUCAGAUCGCCUGUGUGC  
>P4438  
AACCUAGAAGGUGGAGAGGAUCGUCCUCGGUGCCCAGAGG  
>P4439  
CCUAGCUGGACCGCCGAGGGACAUCGACGAGUAUCCUCCUC  
>P4440  
CCCCUGGAAACCGGACCCGACCCGCGGUCGCCAGCCAGA  
>P4441  
CCUCCGCACCUGGCACGCACACGCCAUACACGUUAACCUGU  
>P4442  
CGAGACCCGGCGCCAGGCCAGCUUCCCGGGUCCGGCGCCG  
>P4443  
GGCGCCGAACAAUAGGUCCAUGAUGGUAGAAGCUCACUGG  
>P4444  
ACAGUGCAGUUUCCGGAGACGCCGAGCCAGGGUCCAUC  
>P4445  
CGAAUGGCAUCUGUUUCUGCAGUUUGAGGUGUUAAGGCACG  
>P4446  
ACAGAAGCCGGAAUCGGAGAGGAACUGGCACCCCCGGGA  
>P4447  
CCUCAGCACGUUCUUCGGAGACACGGCCGCCAGCCACUCCU  
>P4448  
CCCGAAGCCCCAGGUCGCGACGCUUAGGGCCCCAACGCU  
>P4449  
GGCCCGGGCCGUGCCCGGACAAGCGCGCCGAGGCCGGGA  
>P4450  
GAGCACGCUGGUGGGAAAGGACCCGGGACUUGAACAGUGUU  
>P4451  
UUGUUUUUCCUCAAGCAGGAAAUCUAAAUCAAGGACCAA  
>P4452  
CUUAGGUGCUGGGCCCUUGGAAAUCGGCGGUGGGGGGCGG

>P4453  
UACUUUCAGAGAUGGGUGUA AUGCCUGAGAUUGCACAAGCU  
>P4454  
GGAGGAGGAACGAGGGGAGA AGGCGGAGAGCAGGAACGCGA  
>P4455  
CGCCUGGUGCAUGGGAGGGG AGCCGGGCCAGGAGUAAGUAA  
>P4456  
CUAAGCGUUUUUCUAAUUCA AGUUGUUUCUCCAUCUUGU  
>P4457  
CUUUUCCCCGCGGUGCCGGGA AGGUGGGAGAAAAGGGAAGU  
>P4458  
GCAGGGCCCUUCCUCGCGAC ACCCGAAGACCCGAGCGGGUC  
>P4459  
GGGGCCAGGCAGAGGCUGA AGGAGAUGCCCCGGGCCAG  
>P4460  
GGGAGCAGCAGCAGGAUUA ACACUGUCAUCGUCAAAGGUA  
>P4461  
CCGGCCAGGGCGGCGGCUC CAGCCGGGAGGGCGACGUGGAG  
>P4462  
GCGACGGGGCCGAGUUCACC AGCCGCCGGGCAGUAGUCGA  
>P4463  
AGCUGCAGCUUCGGAAGGAA AGAAACAGCAGAAGAAGAA  
>P4464  
AAGGAGGAGCAUGAAAAGAA AAAACUGGAGGAUGGAAGCCU  
>P4465  
GACAGCGGCUCGUGGGGCUC AGUAGAGCUGGCGCUGAGAG  
>P4466  
GUGAAACAGGAGCCCCUGGA AGAGGACAGCCCCUCGUCCUC  
>P4467  
GAAGAUGAGGAUGCCGAAGG AAAAGAUGAAGAAAAUGGCGA  
>P4468  
GGAGGAGCGGCGGCCAGG AGGAGGAGAUGGCAGCCGGGG  
>P4469  
AUACCUGCGUUUGUCCCUCC AGCAUCUGCUCUGGCUCCAUG  
>P4470  
GGAGCUGAUUACCCGCGCCC AGCCGUUCGUUCUUAAGAGC  
>P4471  
GGGAACCAAGCGACGGCGGC AGCCACUGCUACGGCGGGGGC  
>P4472  
AUGAGGUCACACUCCAUGCU ACUGUGGUAUUCAAAUUUCCG  
>P4473  
GCAGUUCUGGGCUCCUCGC ACUUGGACUCGUCACAGGGCA  
>P4474  
GGCCCCGGCCUGCAGCUUGG AGGAGAAGCUGAGCCUGUGCU  
>P4475  
UCCUCAUCCUCCUGUCCGG AUCUUCUACUGCCUCCUCGGG  
>P4476  
CGGUGGGGCGCGGCCUCGG AUGCCGCCGGCCAGUCCUCGC

>P4477  
CCGCCACCGCCACCACUCCC AUGAGAUUUACUGGCGUGACU  
>P4478  
UCUCCGGCAUGCCCUGAAAG AAGCGCACGAAGCCGACCUCG  
>P4479  
UGAAGCCUAAAUAAGACA AGAUUAAGAGGCUUGAAUUGG  
>P4480  
GGUGCAGCAACAGCAGCAGC AGCCCCGCAGCAGCCGCCGC  
>P4481  
CCAGCUUGUCCUGAUAGGGG AAAUCCACCUUCCAGAUCAGG  
>P4482  
GCUGGAGAAAGCGGCGGCGG AGGAUGGAGGAAGGAGGCGGC  
>P4483  
GCACACCCUGGUUGAAGCAG ACAUUGGCAUCCAGGCAGAGC  
>P4484  
AUUAUUUUCAGAUCCUCCUG ACCUUUCUCCUGUUCUUGUUC  
>P4485  
UGAGAAAGGAUAUGAGGACU AACAGAUACAAAUAUGGAG  
>P4486  
AGGCCUCAGUGGCUCUUGUC ACCCCUUCUCGCGGCUGAACC  
>P4487  
CCCGGCGACCGCCGCAGCUC ACGCUCCAUGCGCGGCGCCCC  
>P4488  
CUCUCUCCUCACACAUGC ACACCUUGAGCCCCUCCUAA  
>P4489  
CCUCCAGCCUCCACGUCGC ACCGAGGCUGCUGCUCACGG  
>P4490  
CCGCGCGCCGCGUCCACGU ACCCCGCCGCGCCGGGCAAGA  
>P4491  
CAUGGUGCUGCUGCUGAC AGGGCUGUGAGCAGCCGGCCU  
>P4492  
CUCCUGCGCCAGGCCCGGAG ACCCCGGGGCGGCUUCCAG  
>P4493  
CUUAUUUUGAAAUCCACACC AAUUGUGCUGAUGUAGCUUUC  
>P4494  
GCCACGGGUAUUCGAAAGAA AGGAAUGAGAUAGGCUGUUC  
>P4495  
CCGUCGAGCCGCACAACCU ACAGCCACCGCCGCCCGGCCG  
>P4496  
ACGCCUCUCCACCAUAAUA AGAGGCGUCUACCGUUGGCCA  
>P4497  
CAGCACCCGGCUGCUC AACG AUCCAUUGGUCACGGCUCC  
>P4498  
GUAACCUCUGGUCAGCCGAG AAACCCACUAUCCUGUAGCC  
>P4499  
AUGAACCACAUGGCGCCCCC ACCCGCCCGCUCCCCGGCCAC  
>P4500  
CGGGCGACAGCAGCGAGGCC AGGAGCGGGGCCAGCGUCCGG

>P4501  
CUACCCACAGGCUUGCUAUGAGCAAGAGACACAACCUCUC  
>P4502  
GCGCUUUUGGCCGACUUGGC AUUGGGUGGGCGGCUUCUUGG  
>P4503  
CAGCCUCAGUCACUGGGAGAGAACCUCUCAUACCCUCGG  
>P4504  
CCACUUCUCCUGCACGGACCAACGCCCGCCGACUCGGACU  
>P4505  
GUUGGGGUCACUGAACCCCGAGCAUGCCUGACGUCUGGGAC  
>P4506  
GACAGGUCGCAUGGCAGGGAAGGCCUGGGUGCCCCAGAGAC  
>P4507  
GGGAGGGGCCAUGCUGUGUGAGACCAGGGGACCAGAGGGAU  
>P4508  
GUGCAUCUCCACUCCACCCCACUUCCCAUUCGGAACACGGA  
>P4509  
UCACUUUGCAGGUUCCGCACACGAUCAUUUCCUCCACCUUC  
>P4510  
UUGGUUCGCGUCUCCUGCUCAGGGUCCGACGGCUCGCAGUC  
>P4511  
UGCUCUCAUAAGUGUCGUC AUCAGUGGGCAGCUCAUAGCG  
>P4512  
GAACCACGGCUUCGUGCACC AUAUCCGACGGAACCAGAUCG  
>P4513  
CUCUUGGGGUGUCGGAAUUCAAAACGGACCUGGAGGAUGUU  
>P4514  
CGCGGCAGCUCGAGUCCACCAGCAGCGCCGUCCGCUUGACC  
>P4515  
AAAAAGUGAAACGAUCUGUGAAGAUGCUGCCAAGAAGGGC  
>P4516  
GGAGGGAAAAAACCAUAUUAAGGCCCGAGACUGCUCUCC  
>P4517  
UCGCUGCUUUUUAAGUUUCAAAUUGACAUUCCAGACAAGCG  
>P4518  
CGAGCCCAGCAGCAGCAGCAGCAGCAGCAGCAGCGCCCGUACC  
>P4519  
UGC GAAAGAGGGAAGAAAGAAUUCGAUCCGUGUCUUGGUGG  
>P4520  
GCAGGCGGCAGAGGAAAAGAAGAAAUCUGGGCAGUGUGAC  
>P4521  
GCCAGUUGUGGUGCUGGUGCAGCUGGAGCGAGAGGAGGAAG  
>P4522  
UAGAUGAUGCCCACCAUCUCAUCAUUGCCUCCGACAGCAG  
>P4523  
CGGCUCGGGAUGGGUCCAGGAUGUUACUCCUUCUUCUUUG  
>P4524  
CAGCAGGACAGCUGGCCUGAAGCUCAGAGCCGGGGCGUGCG

>P4525  
GGACCUCCGCGCAGACUCUCAGCGCCUCCCGCCUCUCCGCA  
>P4526  
AAGCGCCGUCAUGCCUAAGUAUUAUGAGGACAAGCCGCAGG  
>P4527  
GUUCUACUGCCCGCUUUAGCACAGUGGCUGCAGCUGUGCUC  
>P4528  
AGAAAAAAGCGAGAUGAAGAAAAGCGAAACUGCGGAAGCU  
>P4529  
CCGCCCGCGGCCCGCGAGGAGAGUACCGGGCCGGCUCGGC  
>P4530  
GUACAGUGGGAGUGAGGAAGAGAGGAGGAAGUGCCUGAAC  
>P4531  
UCCGCUCUGCGGUCUCCGAGACCAGCCUCGGGGCCGAGUUC  
>P4532  
UCCCGCUCCACAGCAGAGACAAGCGUAAAGGCUUUGAUGCU  
>P4533  
UUUGACCUAGCAGUAGAGCCUACGUCAGAGGCUGGGCCAAAC  
>P4534  
CAAGAUGGGGUGGCUUCACCAGCUACCCUGGGACCGGGAA  
>P4535  
AUGGAGGAAGGAGGCCACAAACCUAGAAGCUGGAGCCCUA  
>P4536  
GUCUGCACAGGCACCACCGAAGGCACACGGAUCUCAGAGGG  
>P4537  
UUGAAACUUAAAAAGCAGCGACCAUCCAGUCAUUUAUUUCC  
>P4538  
UCAAUUGGCUACCGGAAAAAACCCAGGCUGGGCUGGGCGCCG  
>P4539  
UUCAGUUUUCUUGGCUGCAGGUACUCCUGAAGCUUUCU  
>P4540  
UCAGGACAAUCCUCCUCCGCAGGAUCCUCCUCCUCAUCCGC  
>P4541  
AGGCUGCUACACACAUGCAGAGUCAUGCUGGUGGCCUGGA  
>P4542  
GGGAAGCCGAAGCAGUAGCAAGAAAGCAGCAGGCUCGGUCG  
>P4543  
GAAUCAAGACUGACGCUUCACGGUACCACAUCUUGUCCU  
>P4544  
GGAGUUCUUGCAAGUCGGCCAGGAUGUCUCAGGUACAGCGC  
>P4545  
ACGCCCCACUCUUCGGCUUUACUCCUGGCCUCCUCCACAGG  
>P4546  
AACCAGCGCAAUCAAUCGCAACGGCCGCCGUACCGCCGCG  
>P4547  
GCCGGGGCCACCCUCCCAAGUCCCAUCUCAGGUAGGAG  
>P4548  
CCGCCGGGGCUUCCAGGUCAAAGAAUUCGCCUUGCCGCUA



>P4549  
UAGUGGUGUGGUUCUUUCAAAAGGGAGGUCAGGGUCA AUGGG  
>P4550  
CCAGAAGAUCCAGGACUAUAACAGGAUUCAUGAUUUCAA  
>P4551  
CCUGCUACGAUAAGAGGCUGACCCUCCGAGCCCCGCGUCUC  
>P4552  
UUCCCUUUCGUAAGACUCUUACUUGCACCCACCCAGCCCCG  
>P4553  
CCUUUGGCCUGCCUACGGAAGCCUGCGAGGGAGGGUGGUG  
>P4554  
AAGUUGUAGUACGGGUGGGGAGAACCACACUAAAGGGAGAU  
>P4555  
GCCGACUCCACCCUGGCUGGAGGAACUGGGUGCUCCUGCCC  
>P4556  
CUAGGCCCGUGACUGAGGAAUGCAGUCGGCAGCGAAGCAC  
>P4557  
GGCGCCGGCGACCUGAGGGGAGAGGGAACGCAGCUGAAAGC  
>P4558  
UGC GG CACCCG CAGCCCGCC AAGCUCUCCACCGCGCAGGGC  
>P4559  
GUCCUCUACCAUUAUGUAGGACAAUGCUAAAAACAGAAUAC  
>P4560  
GUAGAAGUAAAGAGAAGUCUAAACAGUUAGAAUCAAGAGU  
>P4561  
GCCGCGCCACAGGCUCACAAACAGCAACAGCAACGACUCCA  
>P4562  
GCGGGCGAUCGGUGUGGCCGAGCCGGGCUCCGCGCUGCUCC  
>P4563  
CAGUUUUUGGCAAAGCGGAAUACUUAAGGCCCCUGGGUUG  
>P4564  
GAUUAUAUGUUUCUAAGGUCACAAACAUGUCAGACAAAAGU  
>P4565  
CGGCGGCCAUGGGCGGACGCACGGGGAGGGGAGCGGGGACC  
>P4566  
GCGGCGGGAGAGGAUGCGGGAGCGGGCGGCGGACACGGCCG  
>P4567  
UGGGAGUGCGGGACGCCUCAAAUGUCUCCAGUGGCACCC  
>P4568  
CGCCAGAACCGCGCGGCUGCAGUCACCUCGAGCAGGCCGGC  
>P4569  
AGGGACGGCUCAGCGGCUGGAGGAAGAGCGGUGCGGAGCGA  
>P4570  
CAAACAAAUGAUAGGAAACA AAAAGAAAGAAGACAAGAACA  
>P4571  
AGAUGCUUCAACUGGUCCA AUAACAAGUACCCAAUGCUC  
>P4572  
UUUUGGCUUUUGUAGGUUUC AUCGAUUUCAUAGUAGAGCCA

>P4573  
GUUUCACCAUUCUUUCCAGGAGGACCCUAAAAACAAGAACA  
>P4574  
GACCUCCUCUUUCUCCAGGC AUUCCUUGCAGACCAGGAGUA  
>P4575  
UGUCAUCUCACCGCCCCACCACAGACCGCGUUCCCCGAGGA  
>P4576  
UUGGGGGCCGGCGGCCCGCCAGGCCGGCUAAACGCAGAAUG  
>P4577  
AAGCCUGUCCCAGCAAUGUAGCUCCACAGUCCCCUCCUGC  
>P4578  
GCAGCGGCUGGAGGAGCGCGAGCGGGCGUUUCCUUGCCCCGG  
>P4579  
AAAAGGGCAAUUGAAAGUCAGGAGAAAAGCGCAAAGAG  
>P4580  
AGCUCUUCUUCUCUCAGGCCACCAUGUUUCAGAGUACCUUU  
>P4581  
ACCACAGCCUGGCAAUCCCAACCGGACUCCAGUGCCUCC  
>P4582  
GAGCCGCCGCCGCCGCCACUGCCGCUUCACCGACAAGC  
>P4583  
UCCAGUGGGGGGUGUCAGCAGCAGCCCCGCUUCCGAUUC  
>P4584  
AACUAGGCCCUUGGAGGCGGGAAGAGGAUGUGUGGGUGGGGU  
>P4585  
UGUGCGACCGCCUCCGGCUCAGCCGCCUCUAGGAUAUUGGG  
>P4586  
AGCUCCAGAGAGACUCCCCAACCCUGCCAUGCCUGCCUCCAC  
>P4587  
AGGCAGAGGAGGAGGCGGCCACGGCCGAGGCGGUGGGACGC  
>P4588  
AGGGAGAGGAGGCCCGGAGCACCCUGGAGGGCAGAGACAAG  
>P4589  
GGCGGCGGUGCGCUAGGGGAGUGGGCGGUGAGGCCUGGUC  
>P4590  
UAUUGCCCAAGCGGAGGAGGAGAAAAAGGAAUAAGAAGGAG  
>P4591  
UCUCUGACAGGCUGUAGGCCAUGGCCAGCUGCAGGUCCUCA  
>P4592  
CCCGCCCCUGUGUUGGUCCCACAAUCCCUGGCAAUGAGAGG  
>P4593  
GCACAGCUGCCAGGGGCUGGAGCUGGCCCGGGAACUUGUUC  
>P4594  
CAGGGCGGAGCCACAGGAGGAGGAAGAGGAGAAGGAGGGGA  
>P4595  
UCGGCGGCGGGGAGUCGGAGGACGCAGCCAAGCGGCGGC  
>P4596  
AGCAGCUGUGGCUCACGGAGACAACCACCACCCAAACCCAA

>P4597  
GGGCCACUGGCGGUUCACGGAGUCAGAAAAGAAAAGGACA  
>P4598  
AGUGACCCCCUGGAUUGUUUUUAGGCCGGUUGGACAUUGG  
>P4599  
GCGCGGCAGUAAUCCACUAGCUCCCCCACCCCCCAG  
>P4600  
GCGCAGCCAUGGUGAAGAUUAGCUUCCAGCCCGCCGUGGCU  
>P4601  
AAGAAAGUGUACCCUCCAAGAAAAGCUUCUGAGGACUUUU  
>P4602  
UGCUGCAGAAGCUCAGGGCCAGUCGCCGCCGCUUCCAGAGG  
>P4603  
CGCUGCUCGCGGAGCAGCCAUUAAAGCCCAGGCAGCCGCC  
>P4604  
CCAGUGGCGGUGAUGGCGGAAGCGCCUUUAGUUUCAAAAA  
>P4605  
ACGCCGAAGUGCUGGAGCUGACGGUGCGGCGGGUCCAGGGU  
>P4606  
GCUACCUGCACGACAUCAUCACGGAGGUGGGCGCCGGGGAC  
>P4607  
ACAGACACAGAGAAGGGGAGAGAGAGAGCCAAAGCCCGG  
>P4608  
GAGGAGAUUGUACGUGAGAGAUAGUCAGAUCCGCGUGUAG  
>P4609  
GUCCCGGCUGUCGCCGCCCGAGCCCGCGCGCCGGC  
>P4610  
GAUCCGCAGCAGCAGGAUGCACUGGCCCGCCUGACCCUGGA  
>P4611  
UGGGACAGGGCCUCCCCACAGACACGUGACAACAGAUCAA  
>P4612  
AGCCCGGGCACAGGAAGGCCACGUCCCCGGGGAGGGACGCC  
>P4613  
GGCCAAGGCCCGCGAUGGUGAUCUGCUGUGCGGCCGUGAAC  
>P4614  
AGCUCCGGAAGGCUGCGUGGAGACGCCAGCGGCGGGCGGUG  
>P4615  
CGCGCUUUGAAGCAGAUCUGAAGGACAAGAUGGAGGGCAGU  
>P4616  
CGCCUGCCACCUGGGCCGGCACCUAGACGGCGACCAGGCGAU  
>P4617  
AUGGAGUUGGAUUAAGACAGAGAUGGCUGGAAGAAUUGUG  
>P4618  
CCUGCUCGCUCGGACACCCCAGCGCCUCACAGAGACCCCU  
>P4619  
CACUCCCAUGGCGGCGGGCGGACGCUGAGCGGGCGGGCGGCG  
>P4620  
CACCUUUAAGAGAUCAUCCACCAGCUCGUUGGGACUUUUC

>P4621  
CAUUCACUUACUUGUCAAGCAUUUACUGAGAGCUAUCAAUG  
>P4622  
GGAGGAGGAAGGUGUCGAGAAGCCAGCGGAAACUCACCUGU  
>P4623  
UCACUUCGCCACCAGCCGGAAGUUUUCUGUCACUGGACGC  
>P4624  
GCCC GCCGUCCUGCCCCGCGAGCGCUGCCGUCGCCGCCGUC  
>P4625  
CCUGCCACGCAGCUCCUGCCAGACACCGCCACUCACGCUCA  
>P4626  
GCGAAGGGGUGGAGAGUGAUUGAAGAGCGAGAGAAAAGAG  
>P4627  
UGCUUAUGCACCAAGGUCCAAGUUCAAAGCCGUAUGAGAAG  
>P4628  
GUGUGCGGCAGGGCGGGGACAGAACCGUCCUCUCGGGCUCU  
>P4629  
GACCUCUGUCCCAAGCAAGUAGAACUUUAGCCUUAGGAGA  
>P4630  
CCUCACUUCUCUCCUCAUCCACACCAGCAGCCAAGUUGUCC  
>P4631  
GAACUUGUGGAGAGACUACAAGUUUUGGUUGUUAUGGUCC  
>P4632  
CUUGAAGACUAAAAAGAAGAAGAUGGCUGCUGAUUAUJUCC  
>P4633  
GAUGGAAGUGAAGAUGAUGAAGAGGAGGAUGAAGAUGAAGA  
>P4634  
AGGGGAGAAAAGGGCCGAGGAGCCAGGAAAACCGAAACAGC  
>P4635  
CGUAUUGAGAGGAGAUACACAGGCACUACGAGAAUGGAGUU  
>P4636  
CUGGGGCGCGCCGCCACGAGACUGCAGGAGCUUCUGAAGAC  
>P4637  
GCUGGGCCUCGCCUCGUUGAACACCAUGCUCCCAACCGUG  
>P4638  
CGGCCAGGUGAGCGGGGCGCAUAGGUGACGGAGGGCCGAGG  
>P4639  
GAAUAGAAGAGGCUUGUGAAUGUAUACCAGAGCUGCAAU  
>P4640  
GCGACAUGGACAACGCGGGGAAGGAGCGUGAGGCAGUACAG  
>P4641  
GUUGGAGCUUGCCC GCGGGAAGCGAGUGGACGGGCCCUCC  
>P4642  
UCUACAGCAGCUGCGACACCACGGGGACUGGCUUUCUGGAC  
>P4643  
GGCCGGCGGCGAGCGAUGGCAGCGGGUGCUGCUGAGUCUGG  
>P4644  
UCGCUACGCGGGGCUACCGGAUCGGUCGGAAAUGGUGAGCG

>P4645  
AAUGAACUCGGCCAGACUGGAGCGGAACAAGGCCGCCCGCA  
>P4646  
CCUACUCGCCAGUGGACUACAUGAGCAUCACCAGCUUCCCG  
>P4647  
GAGCCGGAGGCCGGGCGCGGAGUUGGUCUCCGCCGCCCGAG  
>P4648  
CCGGCCGCCCAUCCGCCCAAGCCGCCACUGUGGCUGCCG  
>P4649  
UCGGCAGCAAUGUUGUCAACAUCCUGAAGUUGAGGCUCGG  
>P4650  
AGCCUCCUCCUGUCCAGCGAGAGCAGGAAUAGUGGUCCU  
>P4651  
CCAAGUCAAUCCUGUGGGCAACCAAUAAAACCAACUUUA  
>P4652  
GCAGCCCCGUUGAUGACUGAAAUGACAAAGCAUCCACCUA  
>P4653  
CCCGCCGGGGCAGCCGCCGACACCAGGACCGCGAGCCAGA  
>P4654  
CGCUCUGAGAAGGGGACCCGAGAUGGGGAGCGAGGGAGGGG  
>P4655  
CACAGCGGCUCAGCUCCUGGAGAGUGAGGGUUGAAGAAAGC  
>P4656  
UGAGUGCAGGGAAGUGGAGUAUUUGCUGGGCCGGGUACCAU  
>P4657  
UGGGCCCCGGAGACCGCAGAACCGGCGCCAGCUGUCCCCUG  
>P4658  
CAGUGAACAUAAAGAUUCUGAAAAGAAACACAAAGAGAAGG  
>P4659  
CUUUCCUGAGGAAUGAAAAAGGGAUUGAGGAGUUGCCUGA  
>P4660  
AAAAAGUGAAUGCUGAGGAGACCAAGAAGGCUGAGGAGAAU  
>P4661  
AGAGCCAAAGGAACCCAGAAAGGCCAAGGAGCCGAAGAAGG  
>P4662  
CUUGC GGUCCGCCGUUCGACAACCAGCCUUGGGUCCCCGC  
>P4663  
GGGAGGGUCUGAGGAUUGCGACUCCCCGUACGGGUCCUUGAC  
>P4664  
GCGGGCGGCCGUGCGGCGCUACCUGCCCUGGGCCCUGGUGG  
>P4665  
GCGGGUCAAUCCGGCGGCGGGAGCCUCGUCCGGCAGCGCACG  
>P4666  
GGGAUGGCCCCAAAUUCCCAGACUCUGUGGAGGAGCUCCG  
>P4667  
CAGCGCCAUGGAGACGGUACAGCUGAGGAACCCGCCCGGCC  
>P4668  
CCGUCGCGCCCGCAUCCCCAGCUCCAAGCCGCCCCUCUCG

>P4669  
CCAGCCCGGGGAGGCGCUGGAUCUCGUCCUGGUCGGGGGCU  
>P4670  
CUUCCUCGAAUUGGGGAUCGAUCACGCCUUGAAUCUCGACU  
>P4671  
GUAACUUCUUCAGCUCCUCAAGAACAGCUAUGGCGGCAUUU  
>P4672  
AGAAGGAAAAAAGGGAGAGGAAGAAGGGACGAAGGGAGGGA  
>P4673  
AGAAGAAAAGGAAGAAGUUUAUGAAGGAUGCCAAAAAAAG  
>P4674  
UUGAGGAGGAAGAGGUGGUGAGGCCCCAGCGGCGGAAGAAG  
>P4675  
AGGGGAGUGGAGGGGUUACAAUCUAUGCUUCGGCCAAGGGC  
>P4676  
AGACCCAGCUAACUGUGCCAUCUCCUACUCCUUUCUGGCC  
>P4677  
CAGCGAGGGCCGCGACAGCGAGGGCCCGGCCGAGGGCGAGG  
>P4678  
UCUGUGUGUGUGUGAGUGAGUGAAUCCAGAUUUUCUGU  
>P4679  
CGAGUGACGUCCUAGGAGCCACCGGGCAAGAGGCGGAGGAG  
>P4680  
AACUGCAGGGUGGCAAUGACACAGGGACGGACGAGGAGCUA  
>P4681  
UGCGGGGAUAAUUUGAUAGAAACUUCAGUGAAGGCCGGGCG  
>P4682  
CCAGUUCAUGCCUCUUGGGGAUUGUUCUCCCCGUCGCAACC  
>P4683  
GCAGCCCGGAGCCAGAGAGCAGGGGAGCGCCGCGCCGGCCA  
>P4684  
CCGCUUCUUGCGGUAAAGAAAUUGUAAGAGUGGGGAGUUU  
>P4685  
CGGCCCGGCGCUCCUCCCCACCGCGGCCCGACGCACCCCG  
>P4686  
GCUGGAGGAGAAGCAGAGAGAAGCACGGAGGGAGCGGGCCA  
>P4687  
GCUCACCUUCCCCAGCCCCAUCUCAGCCAUGGAAAACGGGC  
>P4688  
AAAUUCAACGUGAGGAAGCAAAGUGACAAGGACGCCCGAAGC  
>P4689  
AGAAGAUGCUGAAGAGCUGAACAAACAGAUCGAGGAGCAG  
>P4690  
UGGUUCGUUACAUCAGAAGGAUACAGUUCAUGACAAUGACU  
>P4691  
CGCCCUCACCUUGGGCGGCGACCCCUCGCGGGCCUCGGCGC  
>P4692  
GAGUGCUGGGGCCGGGCGGUAGAGAGCGGGGCUCUCACUGG

>P4693  
UCUCCUCGUCGGUGGAGUCA AUGACGUAGAUGACGCCGUGA  
>P4694  
CGAAAACCCGAUUUAACAAG AACUACAAGGGGAUGAGUCUA  
>P4695  
GUUUGACUUCCUCA AUGAAA AGCUGCAAGGUCAGGCUCCUG  
>P4696  
ACAUGGGGCCCCGCGGGUGCC AGGCCCGCGCACACGCCCCUC  
>P4697  
GAUGGAUGAAAGAAGAAAAG AAAGACGGUAAAAGAAAUUGU  
>P4698  
GAUCUUCCUCCUCA AUCCCA AUCCCAAUCACGGCACGCAUG  
>P4699  
ACACACGAGGGACGCGCCCC AGGAGCUGCAGGUGGCAGCCC  
>P4700  
GCGGCGCGGGCAGAGCAAGG ACGCGGCGGAUCCACUCGCA  
>P4701  
AAUUUUGAGGCUCCUUCUG AUGAAA UUGAGCUGUCCAUG  
>P4702  
AUGAUGAUAGAGAUAAUAGU AACCGUGACAGGAGAGAGUGG  
>P4703  
UUCGCAGGAUGAGGAAAAGG AGGCGGCGGCAGCGCUGGUCU  
>P4704  
UUGGAUAGCUUCUGUCCUU AUCCACAGAAACAUUACAGGA  
>P4705  
GUUUUCAAGUGAAGAAAUC AAGUUUAGCAAAAAGAUAGU  
>P4706  
AGAGCGGGAACGCGAUGAGG AGCAGGAGCCGCCCGCUUGU  
>P4707  
AGAGCUGCAAAGCAGGCAGG AAGGGAGGAGGAGAGCCAGGU  
>P4708  
ACUGGAGAAGCAACUGGAAA AGCAGCGGGAGCUAGAACGGC  
>P4709  
CCUGGCUUUGUAGCUCGCUC AAGAUGGCGGCGCAGCCACCC  
>P4710  
CCGGUCUUCAGUCUCGAGGC AGACGCCGGGCCCCUUUCCGC  
>P4711  
AUCUUCUCGUCCCGGUCGGC AGUGAGGAUGAAGCGGUCAUC  
>P4712  
GGAGGACGCGCCCUUGGACC AGGGGAGCGGUGCGAUUCUGG  
>P4713  
UACAUGGCGGGCUCUGUGGG ACUGGCGUUGUGCGGGCAGAC  
>P4714  
GGGAGCGUCGUUCUCGGUCU AGAGACCGUGGUCGUGGCGGU  
>P4715  
AGCCCGAGCGAGCGGCGGAG ACCGUGCCCCCGCCUCGGCCC  
>P4716  
GGCCCCUGGGCUGAUCUCGG AGCAGGGCCCCGCUCAGCUGUG

>P4717  
CCGGCUAAGACCUGCCAGGGAGAUGGGACCCUUGUGCCACC  
>P4718  
CAAGGUCGGGGAUGGAGAGGACGCGACCCCCGCGGCAGUCG  
>P4719  
GAGCCCUGAGUUAGAGCUCCACGUUGGCCGUGGCUUGUGCG  
>P4720  
CUCCUGUGCCCCCUCCUCCCAGCCCCGGGCAGGCCUCGCCU  
>P4721  
CGGGCGCCUGGGCGAGCCCACGCAGGGGCUCCUGAGGGUC  
>P4722  
UUCUCCGAAUGCGAACUGUCACCUUUUGUUUUUCUCUGUCG  
>P4723  
GCUGGAGUGUUUGAAGGAGGAGAGCGCAGCAAAGGCAGAGC  
>P4724  
GGUGCCAGGUGGAGCUGGACAGGCGGCAGGCCCGCAGAGCC  
>P4725  
GAGAUGCUCUCUGGAGAGAGAGAGGGAGAAACCAGCGUGGU  
>P4726  
AGAGCGAGCUUCGGAGAAGCAGUGGUGGGUCCAUGUGAUG  
>P4727  
GCUGGGAGGUGAGUGGAGUGAGCUUGUCAGGGAGCUGCUGG  
>P4728  
GUGAGUCUCUCUGCUCCACCACCUCCAGCAUCUCAUUGAGA  
>P4729  
AGAGGAAGAUGUGGACUCAGAACAGCCGAGAUAGAAGGGG  
>P4730  
CCAUGCCCUUCUGAAAGGGAAGUGAAGAGGAGCUAGAGG  
>P4731  
ACCGUCCGCCACCUCUCCAAGGCGCCCGCGUAGCGCUCCA  
>P4732  
GCUGGCACGAGAUGUGUGGGACUGGGACGCUUCCUUUGGGG  
>P4733  
CCCAGGUUCAGCUCGCGCCUGACCCUCCGCUUGGCACGGUCC  
>P4734  
CAUCUCAUCCCUCUGCCCCCAGUUCUGCUCAAAUCCCUGC  
>P4735  
GUCCCGUCAGGGUGAAUAUCACUGAAAAAAUCGGCUUGCC  
>P4736  
GCUCUGCCGCAGCGCCAGGCACUUCCUACACCACUACUACG  
>P4737  
CCUCUCAGGCAAUGCAACGAAGAAACCCCGCCGACCGCUCU  
>P4738  
GGAGAUGAAGAGGCUAGCUGAGGAAAGGGUGAGUGCCACCC  
>P4739  
GGCGCCGGCGCCAGACGCGGAGGGAAGGAGCUACGAGUAGC  
>P4740  
ACGGGCGGGGAGCUGGGGACAGGCAUGGACGUUUCGG



>P4741  
GCCCCGGCCCCGGGAGGCGGAGGCGGAGGCGGCGG  
>P4742  
ACCGGCAGCACGGGGGGCAGAUCGGGGCUGCGGCCUGG  
>P4743  
UAUGGCUGCACGUUGGCGCUACCGGACGGGAUGCUGUAUCC  
>P4744  
GCGGCGGUGGGACCCGGGCGACCUUAGAGACGGCGGCAGCG  
>P4745  
AGGCCCAUGAGGUCAUUCUGAAGGCCAAGGACUUCCACCU  
>P4746  
GACUCAACGGGUCUCGGCUGAGCCACCGGGUGAGCUCACCG  
>P4747  
CAUCUUUCGCAGCGGACCGAAGAGAAGAAAAGUAGGCCAGA  
>P4748  
GGCCUCGCUCGCGCCACAGACCCACUCACAAUCCUUGAU  
>P4749  
GAGCGCGCCCGCAACCCCGAAGGCCGGUCGGGGACCCCG  
>P4750  
CAGAUCGGUCUGAGGAGACAGCUGACCUGUUGGCUGAAAA  
>P4751  
CAGCUCCUACGUGCUGGCGGAUGCCAUUGACAAAGGCAAGA  
>P4752  
UGGUGCCC GCGGGCGCAGAAAGGCUCAGGGCGCAGGUCCGC  
>P4753  
CCCAUCGCUCCACGUUGAGGAGCCGACUAGGGCCGCGGUA  
>P4754  
GAAGCAGCGGCUGGAGGAGAAGCAGCGCCUGUCGCGGCC  
>P4755  
UAGCUCUUUCGGGACCCGACAGACGGAUUAGACACGCGCAG  
>P4756  
GGCGUUAGUAUUGGCCGUGUACCCGAAAACUGAUUGACUG  
>P4757  
AACUAGGGAGGAGCCAUCCCAGCCAUGAGCCCUGUGGGAA  
>P4758  
GCUUCAAGCAGAGGCAUGGAGGGCACGGCUCACACGGACC  
>P4759  
AGGGGCGGGCGCUCUAUUCAGAGACCGAGUGGCAGGGCGG  
>P4760  
AGCAUGCCCCAGGAUUUGUCAGAGGCCUGAAGGAGGCCAC  
>P4761  
CCCCCAAUCUAGCUAUUUAAGGGUGGGUAAUUGAUCUCUC  
>P4762  
UCACCUCUCAGCAGUUUCCAGGCACCCACACUGUCCUCC  
>P4763  
UUGAUGAAGUUUUUAUCCACAUAGAGAUACUUAUCGGCAGC  
>P4764  
CAGCCCCUCAGCACAGCCUACCCAGAGGGUUCAAGGAAGG

>P4765  
UUGGUGGAAGGGACUGAGCAAGGCCUGGCAGAGCCCUGGG  
>P4766  
UAGUAUUGCAGACAUGGGCCAGGAGCCAGAGGCCAUGCAG  
>P4767  
GAGCCUGCUGCUGGUCCCCGAGCCGCUGCUCCAGCCCUGCC  
>P4768  
CAAUGUGAAACUGCUCACGGAUGGUGAUGAGCCACAGCC  
>P4769  
CGACGUGCUGGGCCGGGCGCAGGGGUCCUGUUCGACUGUG  
>P4770  
CCCAUUACUAUGUGGAGAGCAUCGCAGACUUGACAGAGGGG  
>P4771  
AGUACCUGACAGGCUUCCACAGCGGAAGGUCGAGCGAAAG  
>P4772  
ACCCGAAGUCAGCGAAGGAGAGAGGCCUCAGCGUCAGUC  
>P4773  
AGGGCUAGAUGACUUGGAGAUGCCGAAGAGGUCAGUAUUC  
>P4774  
CGAGUUUCCGAGCCUCAGAUCCAGGAGAUACGCACAGCC  
>P4775  
CGCGCCGGGCGGCUCGCGAUCUCCGGCAUCCGCCCCGG  
>P4776  
GCGUCCCCGAACCCCAGCAAGGACUCUGUAGCCCAGAGU  
>P4777  
UGGUUCAAAGAAAUGGAAGAAAAGGAGCGAUGUGACCGAU  
>P4778  
AAGACCCGCUCGCCACUGCAGACAGCUCCAUCUUGCUCAG  
>P4779  
AAGAGAAGCCACAGCGCUUCAGAAAAGAGUGGGACAGGGAC  
>P4780  
CAAGCGUAUCUAAGAGGCUGACAUGAAUCCACAGAUCAGG  
>P4781  
UCCAAUCUAGAAGUCUCCAUCCUGCUAUCUAGAGCUGG  
>P4782  
CACGCCUCCGCUGGCGGCGACUUCUCAGCUCCGUGCGCCC  
>P4783  
CGACGCGUGAGUUAGGCCGUAUGCCUUGGCUGCUCUCAGC  
>P4784  
GGACAGGCUGGGGAGAGCGCACUUGAUUGGAGAGAGAAUUA  
>P4785  
AGAGGUAUGAUUACGUUAUUUAUUAUAGUAAUAAUAGAGU  
>P4786  
CGGCAAAAGAUCAAUCAGGAUGAUGUUUAGCCAUAGCUCC  
>P4787  
AGGAAACUGAGGCCAGAGGGAGGCACUCUCCGUCCACAGCU  
>P4788  
AAAAAGAGAAUAGUGUAGAGACCCAGGCCUUGGAUUGGGGA

>P4789  
CGGGUCUUUCCAUAUCUUUACUUUUUAACAGUCUGUUUCU  
>P4790  
CUCAGGGCUCAGGGGGCCACAGGAGGCAGGUCGGGAGGAA  
>P4791  
UCCUCGGCGGCCUCCCCACAGGCUCCAACUCUGCAAGUCA  
>P4792  
GGGGCCUCAACACCGACAUCACAGCCGCAGGACCAACCGUU  
>P4793  
GGGCUCUCCGAGCGGGCCUAGCUUGAGGAAAGAUGGCGAU  
>P4794  
AGAGCUACAGCUGGGCUGGGAGCAUGUGUGGCACUGUAAG  
>P4795  
GCCUGUGUCUUUUUCCGACUGAGGCAGCCAGCUUGCGGGUGC  
>P4796  
GCUCCGCCGAGCAAGCCGAAAGCAGUCGAGACCCCGCGAGC  
>P4797  
GCCUCCUCUCCUCUCUGGGAUUCUUGUCCUUCUCCCAU  
>P4798  
UGAGGGGCAGGAGCAUGAUGAGCUGAGCUUCAAGGCUGGUA  
>P4799  
UCAUUUAUAGGUUUGUCUACAGAUUUUGAGCGUUCGAAGUU  
>P4800  
CCACCGACAUGCUGGACCUCAGCUCUUGCACACCCGAGCCG  
>P4801  
UGACCGACCUUCCUCGCCGGAACUCCUCGCGCAUCGCCGGC  
>P4802  
GCCAGUUCCUCCACUCAGCAGCAGCCUGAGAGCCCAUGCU  
>P4803  
CAGUCCCCUCCCCGAGAACC AUCCCCUUGCCCCGCCAGCG  
>P4804  
UCGCGGCUCGAGGUUGGCAACAAAGAGGGAAAGAAGGAGG  
>P4805  
GAAUUCGCCGUUUUGCCGCGAUUUGGCGUUAACUUAUUGAC  
>P4806  
CGCUGUCCACGCCGCCGACAGGGCGCACACGACGUGCCGC  
>P4807  
UACAGACCCCAUGUUCAUCCAGUGAGUCCAGUUCUUCAUA  
>P4808  
CUCAGACCCGCGGCCAGACACCCCGAGUGCACCCGGCCCU  
>P4809  
GACGACGGCGGCGGGCGGACGCUCCAUUAUACCGCGG  
>P4810  
AGCAGGACGGCGGAAACAGAACAGAGCCC GAAUCUAAAGUC  
>P4811  
UCGGCACGGUCUACGCGGGUAGCCGCAUCGCCGACGGGCUC  
>P4812  
CGAGAGGAGACGGCCAGGAGAGGGUGCCACUCCGAGGGUCG

>P4813  
GACUCGAGGACGGCGCGCUC AUGGCCCGGCCCGGCCUGG  
>P4814  
GGUGGGCGAAGCGCGCCUCC ACGUCCUCAUGUCCGGGAGG  
>P4815  
CCCGCAGAGCCGCGCCUUGC AGGAGGCGCUCGUACUCUCCG  
>P4816  
GCCACCUGGUGCCCGCUCGC AUGACCGUGCGCGCACCGAC  
>P4817  
CUUUGGCCAGGCAGCCGCCA ACAGCCCCGCUUCCGGCCACA  
>P4818  
AAAGAAUUA AAAACUGGUGA AAGCUUGACCUGCGCCCCCA  
>P4819  
UCCGUUAGGAUGGAAGCGGA ACACCCACACCUCUCUCGGC  
>P4820  
CCAGCAUGAUGGCGGCCGGG AGCGAGAACGGACGGGAGGAC  
>P4821  
CCCGCGGCCCGCGCGACC AUGCAAUGGCGAGCGCUCGUC  
>P4822  
CUCUCUCCCCAAGCUGAAAC ACCAGAAGAGCCACACUCGGC  
>P4823  
UGAAUUGCUGCAAUCUCAUG AUCAAUUUGAAUGGAUGAGG  
>P4824  
GCUCCGCCUUUCUGCCCCC ACCCCACCUCACGGGUACGG  
>P4825  
UCAUGGACGCCUUUCGCAAG AUCAUGGUGCCCGGCAGAAG  
>P4826  
CUAGAGAACGAGGACUCUGA AGGCGGGACAUUUGGGCGACC  
>P4827  
GCGGCCCCUCGGGAGCUGGC AGCGCCUCGACCGCCAACUC  
>P4828  
GCUCCAGCUUGGGAUUUGG ACUCAGGACGGCCGAGGAACC  
>P4829  
AGCUUAUCAAAUAUGGAGUU AUUAGCACUAACGUUCUGAUU  
>P4830  
CCUGAAGAAAAAUUGGAGUC ACUACUCUUUCCUAAAAGUUU  
>P4831  
UGACCUCUCCUCUCCUCUGGC AGGGCGGGCUCUCCGAAGCC  
>P4832  
GGACCAUCUGCUGAACCCCC AGGAUGACUGCAGCCUCUUUU  
>P4833  
CCGUUGCCGCCAUGCCCAUG AAGGGCCGCUUCCCAUCCGC  
>P4834  
UCGCCGUCUCCCAGGGUUU AGCACAGUACCUGGCACACAC  
>P4835  
CUGCAUGGACGCGGCACUGA AGCGGAGCCGUCGGAGGAGC  
>P4836  
UUCUCCUUUACAGCCCCGA AACGCUCACAGCUGGCCGACU

>P4837  
CGCUGCCGUGCCGCGCCGACCGGCCACUGCUCCCGCCC  
>P4838  
AGACAUAAGAAGCGAAUGAAGAGAAAAGGAAUAAAAACU  
>P4839  
GCUAUCUCCUCCUCCUCACAUUUCAAGGCUCUUCGAAGCU  
>P4840  
GGACCAGCCACUACCACCCAGGUCAGUGCCCCGUUGCCGC  
>P4841  
CGCCGCGCCGCGGUGCGAGGGGUGCUGGGCGGGGACCC  
>P4842  
GCCCAAGGGCCGCCAGUGUAAGUCGAGGAUAAUCCCGGCG  
>P4843  
GGUCUGCAGCAGAGCUCGAGACAGGGAUCUGAAUGCACUUG  
>P4844  
GGAGAACUCCCCAGCCCAGCAGGCGGGCCUGGAGCCCUACU  
>P4845  
AGAAAACGGAAAUAUAAGAAAACGCUUCGCCUGGGGUU  
>P4846  
CCGAGCCUCCCGGUCGGCUAAGAUUGCUGAGGAGGCGGCG  
>P4847  
CCACCACUGCCGGACCAUCAUUUUCCGAGUCCCUCCGGCC  
>P4848  
GAGGUGGAGGCACCGGCUGCAUUGUUUUCGGGAUCGAGGGG  
>P4849  
AGGCACAGUUAGACGAUACCAGGUGCAAGAGGGCAGCCAG  
>P4850  
CAGGCAGUCGUGGGCCAGCCACCAUGUCAGGGGGGAGGCUG  
>P4851  
AGGGGGCCAGGGCUGGGGAAGGCAGAGCCCCUGAGUGGG  
>P4852  
CAGCACUGACAAAGAACAACAUGUGCAGGUACCUGGUAAGA  
>P4853  
GAGGACGAGGAGGAAGAGCUAGAAGAAGGGACCAUAGAUGU  
>P4854  
ACAGCAUUCAGCAACGAGCGACCUCCACAGCCAAGACUUGG  
>P4855  
UCUGGGUGAAGGCAGAGGCUACAUGGGGUGAGCUUGGGCG  
>P4856  
GCCCCCAGGGAGAGAAGGAUCCAGGACCCCUGGGGCCA  
>P4857  
ACCUGGGGACCCUGGAGAAGACGGGAGGAAGGUAAAGUCCC  
>P4858  
CCUCAGGGUGCUGCAGGCAAAGCUGGGGACCCAGGGAGAGA  
>P4859  
UCGGGGCCUGUGGGUGAAAAGGGAGACCAGGGAGAUCUG  
>P4860  
GUUUCACAGGGUGAAGUUGGAGAGAAAGGUGACGAGGGUCC

>P4861  
GAAAGCUGCGGACCUCGCGGAAAUUGCUGCGGCCAAUGGAU  
>P4862  
UCCACUGCUCAGACAGAUACAGGGCUAGCAUACAGUGUACC  
>P4863  
UCCCUUCGGCCGCCGCCGGCAUGAGCCACAUCCAGAUCCCG  
>P4864  
CCAGGACGGCCCGAGAACUGACAGACGGAGUGACAGACGGA  
>P4865  
UAAUAGUCCUCUAUGUCCCCAGGGUCGUCUUCUUCUUCUUC  
>P4866  
UCCUCAGUCUUAGGAGGCCGAGUUCCCCGACCUCCGGCGCA  
>P4867  
AGAAGUCUUAAGAACUCAGGACAAGCAGCAGAAUACAUGC  
>P4868  
GUGGUCCUCAUUAAGGGUCCAGCUCGGACUUCUGAGUCUC  
>P4869  
CGCCUCCACUCCCGCAAGAACUCGCUGCCAGCGCGCCCA  
>P4870  
CCGCGUUUUGGUGCCUUGCCAUUGUGAAAGGCUCCGUAGCCC  
>P4871  
CUCAGCGCGGGCUGGCGGCUAGGCCCGAUACAGAGCCGC  
>P4872  
CUCCAGCACCUGCGACAUGUAGCUCACGGCCAGGAUCACGU  
>P4873  
CCAGGCCCAGGCCGGUAGGGAUCCUCUAGGGUCCAGCUCG  
>P4874  
CUGCGUACACAGACAUGGCCACAGCGCAGGCACCGCUCCU  
>P4875  
UAGCGGUUCUGCGCCCCAGAACCUCCAACAAGGUUCGGCGG  
>P4876  
AAGCCCUCUGGCGGGAAGGAAGGCCAUUCACCAGGCAACCC  
>P4877  
GGCCCCAAAGGAAAAAGCACAGAAGCGUGAGACGCCACCA  
>P4878  
AGGCCCGGAUCACGGCGGCAGCCCCGGCCCCGCCCAUCUC  
>P4879  
CCGCCGCACCGCUGGGGGCCACGUUGUCGGACCGAGGAGU  
>P4880  
CCGGCGCCAGGGCCACCGCCAUCCCGGGCCAGCCCAGCCC  
>P4881  
AUCCCGCUUUCUUGGAGGAACCACCGCAUCAGAUCUGCG  
>P4882  
AGAUGAUGAUGACACCGAUGAUUUAGAUGAGCUUGACACUG  
>P4883  
UCGGGGGGGGCAGCGGCGGAGCCGCCUCGGACGGUGAGUG  
>P4884  
UGCCCCUGCCAGAGCCGGCCAGGUUGCAGCGCGGACACACU

>P4885  
GAGUCCUGUGGCAGAACUCAAAUGGAAGGAGGAGCAGCUG  
>P4886  
CCUAAGUCCAGGCCACAGUCAGGGAAGGGCGCUGAGAGGCG  
>P4887  
CCUGGCCUCCCGGGGAGCUGAGACUAGGGUCCCAGCACAGC  
>P4888  
GCGUUGCCGGGCCAGGGUCAAGCGGAGGGCUCCGACGGCGC  
>P4889  
UCACCUGCUACCCUCCCGCUACCCUCCCUUUCUCCUCCUU  
>P4890  
AGACCCUCGACCAAGCAGGAAGAAGAGGAGGAGGCGGCCCA  
>P4891  
AGGCACGCCUCAUAGUUUGCAAUCUCAGCCUCCACACACUU  
>P4892  
CCCCUGAGGAGCUGCAGGAGAUGAUCGAUGAGGUGGACGAG  
>P4893  
GCCGGGACCCGGGGGGCCGCACCCAGGGCAGGAGGGCGAGG  
>P4894  
CUUGGAACCCAUGGAAUCCAACUUCUUCUAUAAGAAUAAU  
>P4895  
AGCGCGGGUGGCAGGCUGCGAGGCGAGGGCGACCGAGACUU  
>P4896  
AAGGGCAAACAGUCAUUUGGAGCCACUCACCACUGUUUUA  
>P4897  
UCGGCGGGCGCUGACUGGGAUGGGCCAAGCGGCCAGUGAG  
>P4898  
AGCGGCCUGAAGCAACACGACCCCUAUAUCACCAGCAUCG  
>P4899  
AUUUAGAUCUUGUAGGGUGGAAAAUUGAAAGUGCCAUUUU  
>P4900  
UCCCGGGAUGGCCUUAUGGAGAAGCCGCCAGCCGGCAAGG  
>P4901  
ACUGGGCAACUUCUUCUCCAAGCAGAAUACCUUCUCAUCU  
>P4902  
UGGAGAUGGUGCUGGAGAUAUCGGAGAAUUAUCUGCUAG  
>P4903  
CAGCGGGCAUGCCGACCCAAGGACCGGGCGCCGGAGGGAC  
>P4904  
CCCUUGCGUCCGGUGCGGCGAUGCUGACCCCGGCGUUCGAC  
>P4905  
GAGCAAGGGAUAAGGGAGGAGGAGGAUCCGUCGUGCCGC  
>P4906  
CAAGCAAUACAAAUGCUGUAGCAAACGGUUAUCCAUUCU  
>P4907  
CGGGACCUGCGUCGCCGGGCAGGGGUCGCGUCGCGGUCCA  
>P4908  
AAGAACUUGCGCAGCGGGAGAGACCCAAACAUGUGCGUGU

>P4909  
GUGCGGCGGUCGCGAAGGGCAACCGAGGGGGCCGUGACCAC  
>P4910  
AAAUUUUAUCAAGCCAUUUCAACAACCGCAUACCCAAUUA  
>P4911  
AUUACUCAAGUGUCUCCUGGAAACAGAGGGUCGUUGUCCCC  
>P4912  
CCUUCUUAAGGGUGGGGGAGAUUACAAAGUACAUGAUCAG  
>P4913  
GAGGCCACGGUGGGGACCGAAGGGGACGGCUGCCCAGCCCC  
>P4914  
GGCGGCAGGCACAGCGCGCAAGACGGGGUGCGCGAUCCUC  
>P4915  
AAUGAAGAAGUCUGAGAAAAAGAGCAAGCAAGAGAAAGAGA  
>P4916  
AACCAGAGAGAGUCGGGUGAAGGUCCUGAGAAAACUGGCCG  
>P4917  
UGC GGUGCCGCCGGGCCUGGAGCCGUGGAACCGUGUGAGAA  
>P4918  
CGACUGCAAGGCAGGUUGAGAU GAUGGAUCUGAGGCUUGCA  
>P4919  
GAGACACUCCCGCCCCACCAGACUCAAGCCUCACUCGAC  
>P4920  
UUUACCAAGGCGAAUCCUGGAACACUCCACUACAGCUGCC  
>P4921  
CAUCUCCUGAUAAUUCAUGC AAAACAACAUUUGCUAAUCCU  
>P4922  
UAGCGCAGCGGGAUUCUCACACCUAGACCGUCGCGAGCGGG  
>P4923  
UGAGGACAAUUGAUGACAGAAUAGUACAUGAAUUAACACU  
>P4924  
GAGAAAUGUUGCUACAGCAGAGAAGAAGAAACAGAAGAAGAAG  
>P4925  
UUGGGGUCAGAGAUUCUCUCA AUGAGCGAGGAGACCUUUGC  
>P4926  
GGGAUCCUUUCCGGAAGCGGAGCUCGGCGGGCGGGCCAAG  
>P4927  
CUGGGGAGCCCAGCGGCUCCAGGGCGCCGGCUGGAGCUGC  
>P4928  
GGGCCAGGAGCGAGAGCGAGACUCUGGAGCGGUCGCCGCCG  
>P4929  
CAACAACCAGGUUCGCGCGAAAAGUGGUUCACGUGACCCA  
>P4930  
AGGAGGAGCUGCUCUCCUGUGAAUGGAUCCCAAGAAGAAGCC  
>P4931  
UCCGGGUCCCGCUUCAGCUCAGCUCUGCUCGCGUGAGGCG  
>P4932  
GCUGAAUGCGCAGCACCCCGACUCACACCACCCGGGCCUGG



>P4933  
CCUACCCUGUAAGCCCCGCCAGCCUCCGGACGUGCUGUCCC  
>P4934  
CCAGGACCACCUCGGCCGUCACCUUAGCCAGGUGGCUGCUU  
>P4935  
AGGAAGAGGAGGAAGAGAUCACAUCUAUGCAGUCACCGAG  
>P4936  
CCGCGGCCCCUGUCCAAGAAACUCCACAGGCCCAGAAGACG  
>P4937  
GGGGAGGGGCGGAGCGCAGGAGUCGGAGGCGGGAGCAGACC  
>P4938  
CGUGUGAGAAGUUGGCCUUCAGGGGCUCAGGUUAAUAAUA  
>P4939  
AGCCCGGGAAGACUCGACUCACGACUUCGGGGCGCCUGCC  
>P4940  
CGGGAGGCUGGAGAGGCUCCAGCCUAGCUCCUCCCGCCGC  
>P4941  
ACCCUGAGGCCGUGUAAUCAAUCUUCUUUUGCUCCAAUUC  
>P4942  
CAAGCAAAGAAGCAUGAGGACACUGGAAGACUCCUCGGGG  
>P4943  
CGUCGGCGCCACGGCCGAGACACAUCUUCGCCGCCGAGCU  
>P4944  
GCGAGAAGACAAGCUGCCUUAUGAGGAUGUCGAAUACCAC  
>P4945  
CCGCCGCGGCGUCUUGCACUAGAUCGGGAAGCCGUGCCC  
>P4946  
ACCCCCGGCGACCACCCCGUACAACCCCCCACAUCGGGA  
>P4947  
GAUGGCCGGUUGGCAGAGCUACGUGGAUAACCUGAUGUGCG  
>P4948  
AGGAAUUGGGCGCACCGAGGAGGAGCCGGAGAAGCCACCAC  
>P4949  
CUCCUAUUUCUGUGAAGUGUAUAGUCUACAGGUUCAUAAGU  
>P4950  
UCCUGGCCCCCGGGCUGCCAUCCCGCCGGUUUUCAUCUG  
>P4951  
AUGAACGACGAGAAGAACAUAUUGUACAGUUACUGAAUUCU  
>P4952  
GAGCCUCGGUUACCUCCAUGACCCCUUGCUGGCCCCCUCC  
>P4953  
UGCAAGCGCCGCAGUCCUGAGUCGUUUCUUAGAUCAGGG  
>P4954  
CGUGCUCUGCGCUUGCCAUGAGACUCCUGGGAGCUGCAGCC  
>P4955  
CGACCAGCGAGGGUACCGGGAUGACCGCUCUCCGGCCCGGG  
>P4956  
GGUACUACACAACCGUCUCCAGCCUUGGUCUGAGUGGACUG

>P4957  
GACCAGCCCUGGAUUUGCUGAAAACCCGCAACAAAAUAGAC  
>P4958  
CAAUUCUUUAUCACCAAAAAGAGAAGAAUAUUGCAGUG  
>P4959  
GUAGAAGAUAAAACCCAGCAGAUGACCCUAAUAAUCAAGG  
>P4960  
GCAGCUGCUGGGCCUCCUCCACCUGCUGCACUGCCAGUCUC  
>P4961  
AAGGCCUUGGAGGAGGAAGAAUUGGAGCAGGUCGGGCAAGC  
>P4962  
CGCCAACAUGGCGGAACGCAGGAGACACAAGAAGCGGAUC  
>P4963  
AACGGCAUUCAGACACGGACAGUGACAGGAGGGAAGAUGAU  
>P4964  
CCCGCGUUUCAGCCCUAGGGAGGUAAGGCGUGCAAGAGCC  
>P4965  
GCCGCUCCCCCUCCCGGAUUGGAGGCACAAGGAAAUUCC  
>P4966  
AGGGGAGAGGCCUGGAGGACACCAACAUGGUGAGGCACUGC  
>P4967  
GGCGGCAGCACAGGAGGAGGAGGAGGAACAGCAGGAGGAGG  
>P4968  
GACGAGCAGGGGGCGGGCGGACAUCUUGGGAUCCGGAGAGU  
>P4969  
GCCGAGCCCCACGCAGCCGCACAGACGUAGUCCACAACCAU  
>P4970  
AGGUGCAGCCGGCGAAGACCAGAAGGAGGCCGAGAAGCGGG  
>P4971  
AGUUUUGGAGCAGACAAGAGACUGCAGAGAGGCUUGCUGAA  
>P4972  
UUGCGGCCGCUUAGCCUGAGCGGGAUCUGCGGCUGCCUG  
>P4973  
ACUCUCAGAGCACCUUCCGGAAGACCUCGCCCGCCCCUGGG  
>P4974  
CGGCCUGCACUUCUGGAGGAUGCUCGAGGCCCGGCCCCCC  
>P4975  
GAAGGAGCCCCAGGAGGGAGAGGGACCCGGCGAGGGGCUCA  
>P4976  
GUCAAUGCAAGGAAGAGGAGAAAAGAGGCGCCCGGACCCAA  
>P4977  
AGUGACGCGGCGCCGGCCAGAAUCCGACCGGACCGGGCUC  
>P4978  
GGGCUUCUCGGUCCGGGCGUAGCUCGCGAUGAAGGCCUAGC  
>P4979  
CCGCCGCUUGGGCCUAGCGGUAGCAGCGGCUCUCCAGCGCG  
>P4980  
GCCCCUCUCCUGCGGGGAGAGCCGAGGGGGGGCGCUGCCG

>P4981  
CCCUCUGGGUCCCCCAAGAGGAGGAGAAAAAGCCCGUC  
>P4982  
GCUGCUGCAGUCGGCGCUCGACUUCUUGGCGGGUCCAGGCU  
>P4983  
GCAUGCACACGGCUGGAGAGAGGCUCUGCACCCGAGCACAG  
>P4984  
CAGAUGGACCCGUGGGCUGAGGAGAGGCCUGAGGAAAAGG  
>P4985  
CCGGCGUGGAGCAGACGCGGACCCCUCCUCCUGGCGGCGG  
>P4986  
GAAGCGCCGCGGGACGGCGAGAGCCGCGGCCGCGCGGA  
>P4987  
AGCCAGCCCCAACACGAGCGAGAGAAGGAAGUCGUCCUGCU  
>P4988  
CCUGUACCACGAGGCCGGACAGCGGCUGCGCCGCCUGCAGG  
>P4989  
GAGGUCACCACCGCAGCACGAGAAUCACCAUUCAUUGUACA  
>P4990  
AGGAAGCCAGUGACCCUGAGAGCAACGAGGAAGAAGGUGAC  
>P4991  
GCGCACGCGCACGCUCAGCGAGAAGCGCGCCCCGUGGGCC  
>P4992  
AAUCUUUCCUGUGUCCAGAAGAAAUCUCUCAGUUUGCCA  
>P4993  
CGCGCCAACCUCACGCACUGAGCCGCAUGACUGCCACUGC  
>P4994  
GCACAGCCGCCCCAGGAGGAGCAGAGCCUGGCCAGGGCCA  
>P4995  
CGUCGCGGAGGAGGAGGAGAGCCGGCGGGCGCCCAAGCCAC  
>P4996  
UACAAGUUGAAGCAUGCCAAUUUCAUUUCCUCUCCAGUA  
>P4997  
GCAAUGAGAAAGGAGAAAGAAGAAAGAAAAGAAGGAAAAG  
>P4998  
UGCUCCCAGCCUAGGAGGGGACUCCUGCGGAGAGGUGGGG  
>P4999  
AGGGUGUCUGUGGGGAUGUGACUAUCAGGGUGGGCCUGUGC  
>P5000  
AUGGCGGCGGGCGGCUGCAGGCGAGGCGCGCCGGGUGCU  
>P5001  
AGCCUUAUGGCGGCCGGAGGACGGGCCUCCCCGGCGCGGA  
>P5002  
GAACGGGCAGUUAUUAAGGAAGAAAGCUGGCUGCUGUAUGG  
>P5003  
CCGGUCUGCACAAGUGCAAAAUCCUUUCCUGAAGUUUGUGU  
>P5004  
AACAGGUCGAAAACGCAACAUGGGGACGGCCCUGCAACGA

>P5005  
CAGGGAGAUGAAGCCGCCGA~~AAAUGAGCGCGGUGCGCAGGU~~  
>P5006  
AGGCAGCGGUCUAGGCGAGG~~ACGCCCGGCUGGACCAGGAGA~~  
>P5007  
GGCGGAGGAGGCGGGUACGA~~AUCAGCUGCGGGCGGAGACAU~~  
>P5008  
GAAACCCCUAACCACCU~~GCAGGAAGGGACGAGAUAAAUA~~  
>P5009  
AGGGGCUGAAGAGCUUCCAG~~ACCGAGAGCGGGACAAGCCA~~  
>P5010  
GCUGAAAGAAGAGUGGGAAA~~AGGCCAAAAGGAGGUGGAAG~~  
>P5011  
ACUGGAAGGAGAGCAAGCAC~~AAAGUCAUCAUGGCUUCAGCG~~  
>P5012  
CCUCGCUC~~CCCCGUGACUGCACCGCCGGCCCGCUC~~CAGCUU  
>P5013  
UGGCACCGCGGGGAGAGGG~~AGGGAGCGAGCGAGCGAGCGG~~  
>P5014  
GGUUAUGAGCGUCACAGAGC~~AAGUCGAGAAAAAGAAGAACG~~  
>P5015  
UUACCAUCAGCAAUAACAAC~~AACACAAUGUCAACAUC~~CGCC  
>P5016  
CCUCCAGCCGAUUGCCCUC~~AGGCCUCGAGUCCCCACUAG~~  
>P5017  
UGGGGAGCAGAAAGUGAGC~~AGACAGUUCAAGCAAUGUCAC~~  
>P5018  
AGGAGAGUGCUGGUAUUGUG~~ACUAGUGAUGGGAGUUCGGUG~~  
>P5019  
UCCACGUGCUUUCGGCGGCG~~ACAUGGAGCUGGAGGAGUUGG~~  
>P5020  
CGCGCCGGGAAGCGAGGCAG~~AACUCUAGAAAAGAGGGGUGG~~  
>P5021  
GCUAAGGGCUGGAAUGAAGU~~ACAGAGUGGAGACGAGGAGGA~~  
>P5022  
CGCACCCGUGGCCGCCUCCC~~AGCCUCUUGCCGGACGAGC~~  
>P5023  
UUAUACUUGCCGCUUGUGUC~~AUGAUAACAAUGAAGAUCAUC~~  
>P5024  
AGGUGGAGGAGAUGGCGGCG~~ACGGCCCGGGAAGAUGGCGCC~~  
>P5025  
GAGGAAGGGGGCGGCGAGCA~~AUAAGAACCCGCCGCACCCGG~~  
>P5026  
GCUCCUUCUUCUUGUCUCC~~ACUUCUUCUUUUCUUCUUGG~~  
>P5027  
AGCGAAUAGUCCAUGAUG~~ACCCCGGCCUGAGGCCGCCG~~  
>P5028  
UGGAGUCGAGAGGCCGGAGG~~AGGGGCAGGAGGAAGGGGUGC~~

>P5029  
GGUCUAAUUCAAAUAUCUCAAGGGAAGCAUUCGUACUAAAU  
>P5030  
ACCUGGCGAGGACCUUCGGCAGCCGGAUCCUGCGUUAGUGC  
>P5031  
ACAGAAGAGGAGAAAACGGAAUCUAAUCAGGAGGUUGC UAA  
>P5032  
CCUCUAUCUCCUCUAUGGAGAGAGGCUUCCAGCCUCCCAA  
>P5033  
UUGGGGGAAGGGGGAUGGGGAGGAGAAGCGCACACACGAGC  
>P5034  
ACGAGGAGGACACGGAACGCUGAACUGCCUGGUGACGAAG  
>P5035  
UCCUUAACCAAUCGGCUGCCAUCCGAGGAGCUGAGGAAGCC  
>P5036  
UCGAGCACUAAGAACGGGACACGGUACAAAGUCUCCAUGUU  
>P5037  
CAUGAUUGAAGAUUAAAGCAAUUCCUCUCCUCCUGUGGUCC  
>P5038  
AGCCAUAGCUCAGGGUCAUCAGAAAAUAAUAGACAAAAG  
>P5039  
GCAGCUCCCCGGCUGAGCACAUCCCGCAGCCAACUCCUACC  
>P5040  
AAAUGUCCGAAGGCCGCAGUACUUGACCCUGUAUUUUGGGA  
>P5041  
AUACGGCACUCUCUUUAUUGACUACUGCUUCUCUCGGCACC  
>P5042  
CUUGGAGCAGCUGCGCCAGUACGACGGCUCCCGCAACCCGC  
>P5043  
CAUGGAGACAGUGAACAGGGAGAUAGUGAUCAUGAUGCCAC  
>P5044  
GGUGGUGGCGGCGGAUCGAGUAUUAAGGCUGAAGCAGCU  
>P5045  
UGUAAUACCCUCUCUUUGUUUCGAGCAGCUGAUCCGCUGA  
>P5046  
GCUGC GGGCUUCUCGCGGACACUUGGACCGCCCGUAGGGGC  
>P5047  
ACGGGGAGGCCUAGGCCUGGAUGCUACGUCGCAAUAAACUG  
>P5048  
GGAAGCCAUGGUACAGGCAGAGCUCAGGGCGAUCCCCAGGU  
>P5049  
CCACCUCGGCAGGGAAGAAACUCUAAUCACUAACGCAGUA  
>P5050  
CCGCACUCUAGACCCAGGUAAUCUCACCAACCGCAGGAGCA  
>P5051  
GAGAUGACUGCCGGCCACCGACACCGAGGACUCGCCAGGUG  
>P5052  
GUUCACGCCGAGCCCCGUGAGGGAAGCGUCUCCGUUGGGU

>P5053  
UGGGCCUGCAGGCCGCGAACACAGCUGCACCGGGAGACAGG  
>P5054  
UGACACGGAGGGAGAGGCUGACGACUUUGAUCCUGGGAAGA  
>P5055  
CCACGACUCCAGUUACUAUGAUGACAGGUCAGACCAUGAGC  
>P5056  
AGCAGGUGUGCACCACGUAGACCACGAACACGCCACCACC  
>P5057  
GCGGCGGCCCGGCGGCAUCAGCAGAGACAGGACGGGGCCG  
>P5058  
UGCACUUGUCAAUAUCCUGUAAGCCAGUAACAAUAAAAUUC  
>P5059  
GUUUGACCACCUAGAGGAGCACCUUGGAGAAGUUCGUGGAGA  
>P5060  
ACCCCAGUUGC UUUUCUGCAACUGUUGACUUCAAAACUU  
>P5061  
GGGAGGGGAGAGGAGGAGGGAGCCGGGCCCGGGCAGGUGCG  
>P5062  
GGCUUCCCUGCAGAAGCUGCAGGAGCGGCGGGACCAGGAGC  
>P5063  
CAGAAGGAGGAGUACUGGCGAGACGAGAAGAAGAGGAGCG  
>P5064  
UGACCUUGC GCCGAGGGACCAGGAAGGUCAGGUGCUCGCCC  
>P5065  
GUGAGAGAGUUAGAGGAAAAACUGGUAGAGAGGGAGAAAGG  
>P5066  
CCUCCUUCAGCUCUGUGGUGACGGUGGCCGAGGUGGAGGGC  
>P5067  
UGCAUUAAAUGUCUUGUUCUAAAUUUAUUCUCUGGAAGA  
>P5068  
UACAGCAGCAGAGACAGAAGAUGAUGAAAGUGAUGGGGAGG  
>P5069  
GACGCUCAAACGCGCGCUCCACCCGCAGCCUCCUCCUGCC  
>P5070  
GGCAUCCUCAGCGGCUGGAAGACCUUCUGGCAGUCAGUGA  
>P5071  
GCACCUGGGGCCCGAUCGAAACCGUCCGACAUGCUCUCCU  
>P5072  
CGGAAAGGGCAGCUACAGCCACUGCCCUUCUCCGCCACAAC  
>P5073  
AACAAAGAAACACAAGGCUCCAGCGGCCGCGGUGGUCCGGGC  
>P5074  
GACUCGACCACUGCGGCGGGACCAAAAAAGACAAGGAAAA  
>P5075  
GAAGGUUUUCGGUACUUUGAUAAUCCCUUUUGCCGCUUU  
>P5076  
GAAGGAGCACGUGGGCACGGACCAAUUCGGGAACAAUACU

>P5077  
UUUCUCCUGGUGUCCAGCAGAACGGCGGGCGCAAGGUG  
>P5078  
CUGGACUUAAGGAAGAGUGUACUCGUAGGCGGACAGCUUUA  
>P5079  
GACCGGGACAAGGAACGGGAAGAGACCGGGAAAAAGACAA  
>P5080  
AACGUUCAACGUCUAUGAGAAGAGUUCUAAUGAUAGAGAU  
>P5081  
GCGCGUCACUCCCCAUGGCAGAGACCCCGUCGGGCUCCUG  
>P5082  
AGCUCAGCGGGGAGAAGCAGAACACCGGAGGCCCGACCAGC  
>P5083  
UGGCUCAUGAGCAAGGUGGCAGAUCAUCAAGUGAGUCAGA  
>P5084  
AACCUCCGUCCCCGCCACGAAAACGCUCCCAGCCGCCUAG  
>P5085  
UGGCUAGCUAGGCGGCUGGGAGCGUUUUCGUGGCGGGGAAC  
>P5086  
UCCUCCUCCCCUAUGAGCCCAGGCAGGGCAAUUAACCUC  
>P5087  
UGAAAGAGAAAUAUCGCCACAGGAAAUGGCCAGAGGAGG  
>P5088  
AGGAGAGAGAGAGAGAAAGAUGAGAAAAGAAAGGAAUGCA  
>P5089  
GCCUCUGGCCUCGCCGAGGAACAGACAUCGACGUGGUGGG  
>P5090  
UCCGGCCGGUCCCAGGCCGCACAGCUCGCGGCUGCCAGGGC  
>P5091  
GCGCCUCUUAGCCGCGUCGCAGCUGCAGUGUCAGCAAGUGC  
>P5092  
GGCGGCGGGUCGGGAGUCCGAGAUGGUAGAUCCCCUCAG  
>P5093  
CCUCCUUCUCGCGGCGCUCGAGGGACCAUGGCCGAUCCUCG  
>P5094  
UUUUUACCGACCUCAGAGCUAACUCAUUAUCUCUUCGCAC  
>P5095  
CACUCCGCGAGCGGUGGCCAUUGUACGCAGCUGAUGGCGA  
>P5096  
AGGAGAAGAAGAAGGGGAAAACAACUAGUAGAAUAUGUAAG  
>P5097  
CCCCCCGCGCCAUCUUAACUCCCCGGGGUGCCGCCGCC  
>P5098  
UCAUGUAACGCAACUUGGCCACAUUCACUUUCCCCAUGGCG  
>P5099  
UUCACCAGUUCGUUUGUAAUUGCAAUCUGUUUAAGAUGAA  
>P5100  
CCAGGUCCGACCCGGUGCUGAGGACCUUGCAGGGAAGGCG

>P5101  
UGUCUACUGUAUUUAAACAUUUUUUGCAGGUUGGUCUCCCU  
>P5102  
CCAAAGUCUUCAACAAGGAGAGGGAAGUAAAAAGGGAAAG  
>P5103  
CACAGAAGAAUUCAGAAUAAGAAGGAAAAGGAAGAGGCG  
>P5104  
AGGAACAGCCCCGAGCGGCGAGACGGUCCCCGCAUGUCUG  
>P5105  
CGGCGGGUAAACAUGGCCGCACUGACGACGGUUGUGGUAGC  
>P5106  
ACUGGGGCUGAUUGAUGAGGAGAGUGGACAUGAAGGCGGCA  
>P5107  
GCAAAAUUGAUGAGGAGAGAAAAGCACUUGAAACAAAGCU  
>P5108  
UUUCUGAUGCCAGCUCCAUGAGAAGUUUGAGCACCUGAAGC  
>P5109  
CCGCCCCGACACGGGCCUACACGCACACGCCGCCCGCGGUU  
>P5110  
CCGCCGCCGCCGCCGAGACUGACAAACAACCCUGCAAU  
>P5111  
CCAUUGCUCUCGCUCUCUGAGUAGGAGCGGAACUGCUCCG  
>P5112  
ACUCCUAGCGGCACCGGCUUAGGUCCUGCGGGCCGACCGUC  
>P5113  
CUCCGACGCAGCUCCGCCGACGCUGGGAAGCCGACAGACC  
>P5114  
GUGGGGAAAGUUCUAAAGAGAGAAAAAAGACAAAGAUGAC  
>P5115  
GCUAAGGAGCGGCUCGGACGAGGGAGAGGAGACCGAG  
>P5116  
AGCGAAGAGGCGGGCGGGCCAGCGAGGAGCGCGGAGAGAAA  
>P5117  
UUAUUGAAGUACCUGUUGCUUAUUCUAAGAAUUAUAAAUG  
>P5118  
AGAGGAGCCUAAGGAAGAGGAUCAAGGAGAAGGCUACUUGU  
>P5119  
GCCCCACAGAGCCAUGGUCCAUCCGAGAGAAGCUAUGUUUA  
>P5120  
GCUCACAAGUGAGGUCUGGAAGAACAACAGGGAAGACAUCC  
>P5121  
ACCAGAUUUCACGAGUGGCAAAAUGUUAGCGGAUGAGUUU  
>P5122  
UGAGCUUCUUGAUCUCCAGAUCCACGUUCCUGUCGGCA  
>P5123  
GCUGGCACUUAUCAUGGCCGUAUAAUGGAGGAGUACGAGGC  
>P5124  
GCUUCGGGCCUCUGGAAUUAGCGCUCGCCAGCUAGCCGC



>P5125  
GACUCCACACACUCAGCCAAAGGCAGCACACACAUCACACG  
>P5126  
UGUGGGCGGAGAGGCCACAGACAUCCCCUCCUCAGACGCG  
>P5127  
UUCACCUUCUGUUGAGUGUCAUAACUUUGGCUUGAAGCUC  
>P5128  
GCAAGACAAGACACUCAAGAAGAGCGAGCUGCGCCUGGGUC  
>P5129  
GAACAGAAAAGGAAACAGGAAGAAGAUGAAGAAAACAAACC  
>P5130  
GUUAUCGUUCUUUCGCUGUCAACCAACAAUCGAGUCUCCAAC  
>P5131  
UUCUAGAUCAAAACUCACCAUGAAGACUUCAGGAAACUUC  
>P5132  
GGGACAAAGAUGAAUAUGAGAACUCGCCGAGAAGAGGCUC  
>P5133  
GGCAAGAUUUCGCGCUGCCC AUCCGGGCCCUUCAUCAGU  
>P5134  
GAGCAAAACUAGCCAAGGAGAGGCAGAGAAGGAGCGGCUA  
>P5135  
CGACGGCAUGGCCUGGCUACAGCAGGUGCAGCCCGGGGCCU  
>P5136  
CCAGCCGACUGUGCAAUCCACGACAAUGACCCUGGCGACC  
>P5137  
CCAAGGAGGAGGAAGAGGAAACAAGACAAACAGCCAGUGC  
>P5138  
GAAGUGAGGAGAAGGUGGAGAGAGAGAAGAGGAAGAGGAA  
>P5139  
CUUCCAAGGGGAAAGCAAAGAGAGACAAAGCAAGUGGUGAU  
>P5140  
UUGGGGGUUC CAGAUCUAACAUCACCCCGGUAAGUCCCAA  
>P5141  
CCGGUGUGGUGCUCGCGGACAGGAAGCAGGAGAGUUUGCCA  
>P5142  
AAGGAAGAGCUGAAGAAGCAAGUGGAGAAGCUGCAGGCCCA  
>P5143  
CCCGAUGCAGUCCUGAUGCAGGCUCCCCUCCUGAUCGCC  
>P5144  
GACGGCAGCCCCUGGCCCGGAGCUCUUUCCUCUACCCCG  
>P5145  
GUUGAUGUUGCAGGUGCGUU AUGGAUACAUAACCUGAGGAG  
>P5146  
GGUACCUGAGAUUGGGGGCGACCAUGGCAAAAAGCAAGUUC  
>P5147  
UAUGAAUUAUUCAGAGAUCGAGUCUAAGGUUCGAGAGGCAA  
>P5148  
GGCGGUGACCCCGGCCUGGAACUGCCCCGGUACGGAAGUGU

>P5149  
UAAGAAGGUGGAGACCGGAGAGCUGUGAGGUUGUGAGUAA  
>P5150  
GGUCAGGAUGUCCACGAAGAACCGGCGGCUCUUCAGGAGUG  
>P5151  
GAAGAAGAAAAAGAAAAAGAAGAAGCAUCGAAAGAGCAGUU  
>P5152  
AAAGAAUGAGUUUGGAAGAACCAAAGAAGAUGACCAGAGA  
>P5153  
ACGCUCGUCCUCACGCAACCACUGUGGCAGCUCCUUCUCCC  
>P5154  
AGUUAGCGUCCUCAAUUGGGACGCCUGAGCUCCCAUUAGG  
>P5155  
AGCCGCUGUCGUCCGAGAUCACGAUGAAAUCCUCCAUGGCU  
>P5156  
UGACCAGGAGAAAGAAAGAAAGAAACGGGAGGAGCGGGAGC  
>P5157  
GCGCCGCCUCCCGCUCCCUGAGGGCCUGGGCCGAGAGAGAC  
>P5158  
CCCACUGAGUCACAGGUUUGAGAUUCCAGAGAGGCCAAAG  
>P5159  
GGACCCUGUGCUGGGCGCGGAGUCACGCAGGCUCGAGGUGA  
>P5160  
UGAGUCUGAGCGCUCAGAGGAGAGGCCUGAGGAGUCCAGAC  
>P5161  
AAAAGAAGAAAGAGAGGUGUAGUGGGGCCAGGGCCGGGGCC  
>P5162  
UUGCACCCAGCGUCUCCCUCACAAGACGGCCCGGCCUUU  
>P5163  
CUGGCUGUCACACUUGGGGGACUGAGAGCCUUUUUGCUUCC  
>P5164  
UCUCGGGGCUCUGGGACUGGACGACUGCAGCCUCUCCCUC  
>P5165  
CAACCAGGCACUGGAGCAGGAACUGCGGGCACUGCGGGAGC  
>P5166  
GAGAACAGAAGAGAAUCCAGAGUGUUCAGACAGAACUAGG  
>P5167  
GGAACCGCCGGCCGGGAUGCAGCCUCGCGACCCGGCUCCGC  
>P5168  
GGUCGCCCAGACGUCGGAGGAGCCGGGUCACGAGGCUGGAG  
>P5169  
GGACCGACCCGGGGGAUGGAGGGGGCACGCUUCUACAACC  
>P5170  
CCGGCUCACGAAAGAGCUCUAGGCAGAUGGAGCACGUCGCC  
>P5171  
CCUUGGCUUUCAUCUUCUGCACUGCCUCCAGGUGCUUCCUC  
>P5172  
GCGGGACCAUUUCCCGCAUAGGCUCCGGUGCCCCUGCCCCG

>P5173  
AAGUACGACCCAACCCACGAACUCCAGCCUGUGCGGAAAC  
>P5174  
CUCCCUCUCCUGUGGGAGAAGAGGAGGAGGGGAAGUGACUGC  
>P5175  
AUGAGUUCACCAAACAUGUCACCAGUGAAUGUUUGGGGUGG  
>P5176  
AGCAAUUCAGAAUGACCUGAUCAGUGGAAGACUCAUAU  
>P5177  
ACGUCCGGCAGCCGCUCUCCACGAACUCGUUCAGCUCCUCC  
>P5178  
ACAGUCCAGGAAACCAACAAAUAACUCUGAAAGCAUUGA  
>P5179  
GGUGUACAGCGAACCCAAAGAGGACCUGCUCGUAGCAACCA  
>P5180  
GAGGGACGAGUCCUGCGGGAAGGAGGGAGGCGGGGGUAC  
>P5181  
CGGCCGAGAGAGGUCUGCUGAACGGACACGUGAAGAAGGAA  
>P5182  
GGCUGAAGACUUUAAGUGACAAGUCAAGAGAAGCAAAAGUG  
>P5183  
GUACAAGAACUUCACUUGACAUUGAAGAGUACUCGGAUACU  
>P5184  
AGUCUGUGCAGCUUCCGGAGAGUGGCGGGUUGAUUUUCUCA  
>P5185  
CUGCGGCAUCGCAGCUUGCGACCGAGGCAAACUCCACACAC  
>P5186  
AAGUGGCAGCAACAGAGGGGACUAGCAGCGAAUAUGUAAGU  
>P5187  
ACAGGGUUCACCAGGAUGUAAGAGGAGAGAGGAAUCCACAG  
>P5188  
CGUCACGGGCCUCAGCUGGGAUUCGCGCCCCUCGGACGG  
>P5189  
CUCCGCGCAAGCAGCUGGCCACCAAGGCGGCUCGGAAGAGC  
>P5190  
UAGGCUCAUCUCCAUGGCCAGACUUUGCUUUCUCCUCGCAGU  
>P5191  
AGAAGCAGCAGGGGAAUCAAGGGCAAGAAGGGACCCAGAG  
>P5192  
AUUAGGAACUCAAGGAUUAGAGUUUUGGAGAGGCGGGAGAG  
>P5193  
CAAGCAAUGACCUUGUAAACAGAGAGAGGGGCUCAGACAUG  
>P5194  
UGCCACUGCCUUCUUGUCCACCCACAGCUCUGACUUCUCC  
>P5195  
GCAGCCGCUCCUCGUCGCGCAGCCGGGCCUCGCCCCGCAGG  
>P5196  
GGAUGAUGAAGCUCAAGUCGACCAGACCCGCACCUACGAC

>P5197  
GGGCCUCUCUCCCACUCCCCACACACCGAUUUCUGAGUAGC  
>P5198  
CCGACAAACAAGAUUAAAUGAGCUUGGAUUGAACCUUGUAG  
>P5199  
GAGGGGACCGCCUCUUCUCCACAACUGAGGAGGCCACAGCU  
>P5200  
UGUCUGAGGGCGAUCGUGGGACUCUGCUGCUCCAGGCCGGG  
>P5201  
GGUGCCAAGAACAUGAAGAAGCCCCACAGCCACUGUUGC  
>P5202  
GGCUGAAGGGUUAGCGGAGCACGGGCAAGGCGAGAGUGAC  
>P5203  
GUAGGGGCGAAGGUGCAGGGAGAUCGCGGCGGGCGCAGUCU  
>P5204  
ACACUGUCGCCGCCGUGCCAGAGCCGCCGCCUCCUCCCUC  
>P5205  
UUGUUUCAGAUCGAUGGGCUAGAGGAGAAGCUGUCCCAGUG  
>P5206  
GAGCGGAGCCGGAGCGAGCCAGCAGCCACAAAGUGCCAU  
>P5207  
AGCCAGGCCAGGGGGCCGUAGAGGGGUGACAGGGGCUGCG  
>P5208  
GAUUUUGCAGCAAGCACGGCAGCAACAGGAGGAACUCGAGG  
>P5209  
CUUCGCAACACAGCAGCUCCAUACUCGGGCAGCGAACAGGC  
>P5210  
GGUAGAGAAGGAGAACAGCCACUUUUUCGUCGCCACCUUUG  
>P5211  
GAAGGCUUAUCAAGCCCUCAAGCCACCCAGGCAAAGCAGG  
>P5212  
CGGGCUCAGGCAUUGAAUCCAUUGGCCCGGCCGGCCCGGAC  
>P5213  
CGUCCACAGCUCAUAGGGGAUGUCCAUCACCACCUUGACC  
>P5214  
CCCUGAUUUUGAAGCUGAGGAGUCAGGGGCAUGGCUCUGGC  
>P5215  
UCAGCCACCGUCAUCCAACAAGCGUCCAGCAAUAGCACGC  
>P5216  
CGCAACGGGUUCUAGGCUGCAGGCAGCUCGAGGACCCGCGG  
>P5217  
CCGCGGGGCCCGGGACCGCGAGGAGGACGGCGGGGGCCUGG  
>P5218  
UUAUCCCUAGAUGAUGAACAUGGCCUCCUCCAACAGCCCU  
>P5219  
CUUGAGGGCUCGCGUGAACC CGCGUAGCCCCGCGC  
>P5220  
ACAAGGUCCCAUGCUGGUCACCUCUGAGGAUGAUGCCGUC

>P5221  
CCUCUCGUUUUCCUGCAGGAUCUAUCUUGGGAUCCAUGG  
>P5222  
GCAGAGGCAAAGGCGGCGACAGCUCCUCACCCCUGGCCUCC  
>P5223  
CCCGCGAAGAUGGCUGCCGUACGCCGGGCCCGCAGUUAUUG  
>P5224  
CUUAAUAGGUUUUCAAAUGGACAUIUUUGAUGCAUCACUUA  
>P5225  
GCCAGGGGCCGCCGCGGGGAGCCGGAGCGGGCAGGACCCU  
>P5226  
UUCAUUUUAUCCGUUGUUGACUCAGAUGCCUCAGGGCCAG  
>P5227  
GCGACGGCGGCGGCAGGGACAGCAGGAGCAGUGGUGCUGUC  
>P5228  
CGAGCCACACGGGCUCGAGGAUGGGCCGACAGGGGCUCGGG  
>P5229  
AAAAAGCAGGGAGGAAGGGCACAAAGAUAAAGAGAGGGCAC  
>P5230  
GCGAACUCCCCGGCAGCGGACUGUAGCCCAGGCAGACGCC  
>P5231  
GAGCGGGAGCAGGAGCGCGGAGCGGAGCGUCCGACCCGCC  
>P5232  
GUUGACCCGGGCCCCUCGGAACCUCCAGCUUGGUCCGGUCU  
>P5233  
GCCGGUUAUUCACAGAGAGGAGGUCCUGGAUCAGCAAGAGG  
>P5234  
GGGCAGGGGUGAGGGAGUGAGUGAAGCGGACGCGCGAGGG  
>P5235  
GGAGCUGCAGCGCCUGGGCGAGCGGCUCAGGAGCUGGAGC  
>P5236  
AGCCCAAGAGAAGGCUGAGCAGGAAAGCGGCCUGUAUAGAU  
>P5237  
UGGUUCCAGGGGCAGCCGACCUCCACUCGGGGGACUACC  
>P5238  
AAGCGUUAGUACAAGUAAAAAGGAUAAAAAAGAUGAGCGAA  
>P5239  
CGCUCGGUUCUCUAGGUUGAAAUUCCUGAUACCGCGAAUCA  
>P5240  
UAGUGGGAACAGUCAUAAGCAUAAAGGUGAGGCCUAAAGAAC  
>P5241  
GUUGGAGAGGUGUUACCGGACGCGGCGACAAGGGUGUUC  
>P5242  
GGCCCGUCCAGCAGGCGGAGACGCGGGCUUGCCCCGGCUAG  
>P5243  
CCCAGCCGCGCCUCGCGGCCAGCCGGCUAGCUCAGGUCCG  
>P5244  
ACAAGCAGACACCGCUCGCGAUCCAACGCCAGAGAAUCGAA

>P5245  
GGGCGGAGAGGGCGAAGUGACAGGGGGCGCGGGCAGGGGGCC  
>P5246  
UCACCGCCGCCACGACCACGCUCUGCACUCCCGCUCCC  
>P5247  
GGUGGAGAGGGCUGUACUAGAGGAGGUGCAAUUGGAGGAGG  
>P5248  
GGUUCAGGGUCCGAAUCGGACUCGGACAGUGAGAGCAGUC  
>P5249  
ACUGCCUCCCUUCACUGGCGACCCGGCAGCGGCAGCAGCAG  
>P5250  
GAAAAAGGGUGGAAAAGUCGAGCACAAAAAAGGAGCCCAA  
>P5251  
CGCCCGCUGCCGAAGGCGGCAGGACGAGGCCCGGGGGC  
>P5252  
GGUGGAGAGAAGGCCCUAGAUAUCUGUGGCGCCAGAGAUC  
>P5253  
CGUUCGGUUCGGCACCUGGAACUGGAUCUGGCGGCUGCU  
>P5254  
AGUGCUCCCGUGUAAAUAAAAGAGGAAAAAAGUUUCUCAA  
>P5255  
AGGGCGGGUGCAAUGGCGGAGGAACAGGUGAACCGCAGCG  
>P5256  
AUACCUGUUAAGGGUACACGACAGCGCCAUUGCAGCUGCCC  
>P5257  
CCUCUCUGUCUGGAAGGACAAAUUGC UACAUCAAACAGGA  
>P5258  
ACCACCGAGUGACCGAGGGCACCAUCAGGGAGGAACAGGAG  
>P5259  
AGAUAAAAAAGAGCCUACCCAGCUGUUGUUGAAGAACAGG  
>P5260  
GCGGCUGGGCGCGCUCUCUAUUUUCUUUUCUUCUCCUUC  
>P5261  
GAUGCCUCAGCGAGGAAUAAGAGGUCAACCCGGUGCCAG  
>P5262  
UCGGGGCAGGGACCGGGCGGAGGCGACGCUCCAUGGACGCC  
>P5263  
CUGGUUGCAGUCUAGCGACCACGGCCAGACGUCCUCGCUGU  
>P5264  
GGCUGCGGCGGUGGCUUCUGAGGCUGUCGGGUCUUUGCGGG  
>P5265  
CCACUCCUUCUUGGCCUCACCCUCCCAGUGCACUGAAG  
>P5266  
CCAUGACGGCGACCCGGGGAAGCGCCCCGCGGCCAAGGCC  
>P5267  
GACUGACCGCUACACCAUCCAUAGCCAGCUGGAGCACCUGC  
>P5268  
GGCGCAGCGAUGGAGAAGGAACCUGUUGCGCGACUCCCGG

>P5269  
AGCAGCUGGGCACGGCGUCCAGGGCAGCUAGGGCCUGGGCC  
>P5270  
CAAUUCUAGGCCUUAGUGGAAAUAGUACUCAUCUCUUCUGU  
>P5271  
UGGAUCGCAGGGGACAGCAGAGCGAAGCCCAGCCCGUGGA  
>P5272  
CCAGCUCGCGCCCGCCCGCCCCAGCCCCGGGCCUCCGCGCC  
>P5273  
UGAUUCUGAGCCGCGCAGGCAGGCAAGGGCGAGGGCGGC  
>P5274  
CUCCCCACGGGCCGCGGCGAGCUGGAGGAGCCAAGUGCC  
>P5275  
CUGUGUUGAUAAAGCGUUACCACCAAUUGCGCUUUCUAUAGC  
>P5276  
CGAAAACACGACUAUCCAGCAGCAGCGAAGACGCUGUCCCA  
>P5277  
GCGUCAGGGGCAGGCAACAGAGUGGGCGGCCGUACGGCCCU  
>P5278  
CGUCAUCACUGCGGGAUCCAAGACACAUUUAAGGGACAAGU  
>P5279  
CGGGGAGCUGGCGCUCAUCUACGGCACCCCCAGGGCUGCGA  
>P5280  
GAGGGCUGCCGCGCGCUGGCAGUGCACCUGCUGGAUCUGGG  
>P5281  
CGAGCAGGAGAGCGCCCGGAACGGCGGCCGCAACCGCGGCG  
>P5282  
GACUCCUGGUUCAGGAGACAGACAGCGGACGGAUCCAGG  
>P5283  
AGAGAUUAAAGGUGAUUACGAUUGUGGCUGAGGGCGCCACGC  
>P5284  
GGAGCUGAAGCAGCUGCGGGAGGAGAGCGCGCACCUGCGGU  
>P5285  
AGGCCGGGGCGGAGGAGAAGAUGCAGGAGCAGCUGGAGCGC  
>P5286  
CUCAGCCUCUGGACAUGAGGACCCUGAGACCCUGCUCUUGA  
>P5287  
GGCUGGGACCUGCUGCACGAUGGCCUGGGGCUCGAUGGCC  
>P5288  
GAGAACAUCACGCCCGCCACCAGACGCGCACGAACCUCG  
>P5289  
GUGAGGAGCCCUGGCCUCAGAGGGCAAGGCAGGAGCUCGGG  
>P5290  
GGCCGGCGAUGCAGGGGGGCACUCCGGGGUCCGCAAGCGC  
>P5291  
GCUCGGGAGUGGCCUCAAGAUGGAUGAAGACGGCGGGCGGC  
>P5292  
GCGGGCUCGGGGCGCGGGACGGGCGCGGGCUUGCGGGC

>P5293  
AGGGCUCUGGUCGGCGGCCUACGGCGUGGGGGACGUGCCUG  
>P5294  
CUCAUCCUCUGCGACGGGGGAUGAGGGGUCUGAGAGGAACU  
>P5295  
AGAUGAGGGAAGCGGGAGUGAUGAAGACGAGAAUGAUGAAG  
>P5296  
CUGCCGCUGCUGCUGCACGAUCGCCGCAGCCCCAGCCUU  
>P5297  
GGAAACUUGAACUCUUACUGAGUUGGUCUGCCCAUGUAGAU  
>P5298  
CGAGGGCCGAUGGCCUAAUUACCCGCUGACUGGACCGUGG  
>P5299  
UCUGCAAACUCGUGGCUCGUAGUUGAGAACUGGAAAUGCGU  
>P5300  
CGGCGUGUCCUUGGACUUAGAGAGUGGGGACGUCCGGCUUC  
>P5301  
GAGGGCCGGAGACGCUGCAGACCCGCGACCCGGAGCAGCUC  
>P5302  
AAAAGAAGGGAGGCUGGAGAAUCUGGACCCGAGACGUAGU  
>P5303  
GCAGGUAUUGGAGAAGAAGGAGGCGGGCGGCGAUGCCUGUCA  
>P5304  
AGGCGCUGCGGCCGGCCAGAGAGGCCCCGCACGUCCAGG  
>P5305  
UCCGCUUUUCCGCAGCCCAACAGGCUCGACCAAUCUGAG  
>P5306  
GAGGGAGGGUGCGAGGGGAAACCGGAAGGAAGAGGCGGCGG  
>P5307  
CGCGCCCCGGCCAGGACGACAUCCGCGCACCCUGCGGCGCGG  
>P5308  
AGGAGACACACUGAGCUGAGACUCACUUUUCUCUCCUGAA  
>P5309  
GGUGGCCUCUGCCGCUUUUGAGAUCGGACGCGCGAGUCCC  
>P5310  
CAAAGGGGACGUGUUUGACGAGAAGCAGACGAGUCGCUCC  
>P5311  
CCGGGAGCGGUCGAAGGAGGAGUCUGACGGGUGGCGGGGGA  
>P5312  
UCCCGUUUCCGGCGGGGGAGUUGGCCAGGAUCUGACCCGGG  
>P5313  
GGAGGAGCCCUUGGAGGAGGAGCAACGACCCAGAGCCGGG  
>P5314  
GGUCUUCUUUGUUGAUGGUGAAUAAACAGGCAUUGGGUACC  
>P5315  
UUACCUAUGAAGGCAACAGCAUGACAUCGCGUGGCUGGC  
>P5316  
GUGCCAACUACAGCUUUCACAGGAGAGUGGCCGCUUCCAG



>P5317  
CUCCGGCUCAGCUCCACCCGAAUGAGGCGCCGACACCCAC  
>P5318  
GGCGCGGGCCGGGGCCGCCACGGCGAGGGCCGGCCAGG  
>P5319  
GGGACCACCCCAUCUCCUACCAGUCUGACAUUCCAGCA  
>P5320  
CGUUUCUGCCUGCAGCCUGGAUUGUCUCGCCAUUUAACG  
>P5321  
ACACCUAAAAUGCCAGGGACACGUAGCACUGGAGCUUGCUG  
>P5322  
CAGCAGGGGCAGCAGCGGUAACCCAUGCCGGGCAUCAGGA  
>P5323  
GGACAACGGAGACCAGACCUACUGCAGCCACGCGGGCGAGC  
>P5324  
CCAGGAGUCGCCGCGGAGCCAGCGUCGCCUCCAGCUGUUG  
>P5325  
GUCUGAACGCCGAGGAAUUC AUGUGGAUCAUUCGGAUCUC  
>P5326  
CGCCGUCCAGCCUGAAGGCCACCAGCGCCUCGCGGUAACGA  
>P5327  
GGCUGUACGCUGCGGUGGCAGGCGUGCUGGCCGGCGUGGA  
>P5328  
CCAGACACCAACGGUCGGAAACCGCCAGACACCAACGGUCG  
>P5329  
GCCAGGUCCGCUACCUGGAAGUUGCUGGAGUACACCAACC  
>P5330  
GCUUGCUGAAGAUGAAGGGGACAGUGAGCCAGAGGCCGUUG  
>P5331  
AGAUGAUGAGAGUGAUGAAGAGGAGGAGGAGGAAGAAGAGG  
>P5332  
GUUUUGCCUAACCCAUUCUCAACUUUCCAUUUUCUUUAUU  
>P5333  
CUGAUAGACGUCAGACACGGAACUCUGGUUGCUGUUUCGU  
>P5334  
CGACAAUUUCAUUCAGCUUUACUGGCCUAUAUUUUUCAACC  
>P5335  
CGCGGGCGAGGUGGAGGCCAGGACUCUGACCCUGCCCCUG  
>P5336  
GCGCUCGGGAGCCGGCGCGAAGCGGCAGAAGCCGAGGCGG  
>P5337  
GGCACCGACAGCCGGCCCGGAGACCCGGGAGCUCGGCGCCG  
>P5338  
CGGGAGCCCCAGGGAGGCGGAUCUGGGCCCCGAGAAGGACA  
>P5339  
CGGAGGCGAAGUGGCGGCGGAGGCGAAGGGGCGGCGGGACC  
>P5340  
GAAAAGGGCGACGGUGGUGGAGUCCUCCGAGAAGGCCUACA

>P5341  
GGAGGCGAAGGGGCGACGGGACCUGGGCCUGGCCCGUGUGU  
>P5342  
GGGGGACGCGGGAGGAUGGAGCAAGUGGAGAUCUGAGGA  
>P5343  
AUAUCCACAGCCACUGGAGAAAAGAAGAAAUGUUAAAA  
>P5344  
GGUCCGGACUGAGGAGAAGAAGGCACCGCGGAGAGUGAACG  
>P5345  
AAAGAGAAAAAAGAAACAUAAAGUAAUGAAUGAGAUCAAG  
>P5346  
CCCCGUCGGGAGGCGUUCGACGCCCGCUAGGAGAGAGAA  
>P5347  
CGUCCCCGCACGUUCCGGCCAGGGCCUCCUCUAGGGCCG  
>P5348  
UCACGGCUCCCGCAUAGCCGACCCGAGUGGUCGGGGAAGC  
>P5349  
CCUCAGUGGUGAAAGAAGAAACUUGAUUCGGCAGAAUGAC  
>P5350  
CGGCGGCGGUCGCGUACGCAGAACAGGAGCCGGGGGAGCG  
>P5351  
GCUUCCCGCCUCCACGGGGCAGCGCCAGCGGCCUGGUCCUU  
>P5352  
AUUUGGCCCGUGUGUCGCAUACCGCCCUCUGGACGUGGUGA  
>P5353  
CCGAGAUCCGUCUAGCUUUACUUGCUCCCCGCCGGCUCAG  
>P5354  
GCCGCCGAGGGCCCGCUCCCAGCCCCGGCCGCCGUCGAGC  
>P5355  
CCCGGCCCGCGACCCCGGCGACCCCGAGCCGAGCCUCGUC  
>P5356  
CUCGCGCUCGGGGCCACCACAGCCUCUCCGGGCCGUCGUA  
>P5357  
GGGCAAAACAGGAGAAAGACAGCAGAAAAACCCUGAGGAGA  
>P5358  
CCAUCGCACUUCUGUCCAGACACUGGUGUCUGCACGAGCG  
>P5359  
UGGGACCUGUGCGGUUGGGAUAUUGCUUUUCCUUUUUUUG  
>P5360  
CAGCAGCCGGAGGUGUCGGGACCCUCUGGACCCACCCUAGC  
>P5361  
GGCGUCUCCAGGUGAUUGCGAUUGGGGAAGGUAGAGGAGC  
>P5362  
UCCCCGGACGUGGGGGAGGAGCGCCGGGGAGGGGGCGGGA  
>P5363  
CCCUCCCACAUCAGUCUCCAGACCCUUGGGGCUUCAGAGG  
>P5364  
CCAGUGAGAAGCCAGGGGGCAGAGGGACUGCUGGCCAGGAU

>P5365  
CCGCCGUUCCCGCUCCUGCCACAGCUGCAAGGUGUCCGGGC  
>P5366  
CCCAGGUCCCAGAGAAAGAAGGAUGUGGGUGCAAGCAGCC  
>P5367  
GCGGCCGAGGCAAGUACAGGAAGGUGAGGGCUGUGAUGGGG  
>P5368  
GCCUGGGGAGCCCAGCAAGAAGAAGAAGGACGGGCUGGAG  
>P5369  
CCUCCUCCACCUGAGUCCCCACCCGGGCCGCCUGCUCCCGC  
>P5370  
CCCGAGAAGAGGGAGCCCAGACCUUGGAGGAGACAGGGCC  
>P5371  
AACCCUCCUCCUUCAGGAAAUGUCCUCGGCCUCCACCUC  
>P5372  
GAGAACGCGGGAUUCAGCCGAGAAGCCACGGGGAGCCCGAG  
>P5373  
AUUAACAGGGUAUGAUUAUACCAAGCCAAACAUCAUCAUG  
>P5374  
CGACCACCGAGGCCCAAGAAAGAGCCGCAGACGCUCGUCAU  
>P5375  
GCAGACCGCAAAGCGCCGGAAGAAGCGGUAAGCGGCAUGGC  
>P5376  
ACGGGGGUUCUCUCACCAACAGCUGUGAUUUCAUCCGAAG  
>P5377  
AUCUCCUUGCGCACAUCCGCAGCCAGCAGCACCGCAUCCAA  
>P5378  
GCCGCGCCGAGAGGGGGCCC AUGGCGAGGAGGCGCAGCCCG  
>P5379  
GUUCUUGCUCUUCGAGGGCGAGAAGUAAGUGACGCCGGCUG  
>P5380  
ACAGUUUCUCAGAUUGAAAUAGAAAAGUAUUUCCAAAGUUU  
>P5381  
CUACUCCUCGGUCCUGGUGAAGAGGCUGCGCGCUGCUGUU  
>P5382  
GAGUCCUCGGCUCCAUUCGCAGCCAGCGUGGCCUGUGGAGU  
>P5383  
GGACCAGGGUUUGCCCAGAAACGCCUCCGGACUGGGCACUU  
>P5384  
AAUAUCCACCCAACAACAAGCAAGUUUAUUCUACUUUGAA  
>P5385  
GGAGGUGAAAGUAUUGGCGGAAGGAAAAUACAGCGGAAAA  
>P5386  
CCCUCACCGCGGCCUCCCGGAGCUGGCACGCACCCUAAUCU  
>P5387  
CAAUUGGGCGAGGGCACAAAUUAACCACUUACCCCUUCUC  
>P5388  
CCGUGCCGCAGUUGCCGCCACUGCGGCGUCUGGGCUGAGC

>P5389  
UCAGCGCUUGCCUCAGCUUCAGACUUCAGCCCAGGUGCCAA  
>P5390  
GGCGGCGGCGGGGGAGAGGAAGAGAAAGAAGCGUCUCCAG  
>P5391  
GUGGGUGUCGGUGUUGGUGAAGGGAGUCGAGGCGAGGGGC  
>P5392  
GUGCCCCAGAGCAGAAGAGAAGGCGGGCUCUACCUCAUG  
>P5393  
GGAAGAGGAAGAAAACGAUGAUGAUGACGAUGAUGAUGAUG  
>P5394  
CGGCACCGGCUACGUGCCCGAGGAUGGGCUCACCGCGCAGC  
>P5395  
CGUAGCCCCACAGCACAGGAUGCCGUGGCCGCGCUCACC  
>P5396  
UUCGAGGGCUGUGAGAGGAAGAAGGGCCAACGCUGGGGGU  
>P5397  
CUCUCUGUCAGUCAACAAGCACCGGGACUGAGCCUCACGG  
>P5398  
CGCCAGCAGGAAACCAGUCACCGUGUCCUCGUCUCCGAUC  
>P5399  
CGCCCGCAAUUGCAAUGGCACGGCGGGCAAAGGGAAG  
>P5400  
CCUGCGCCGUGGAGACUGCGACCGCGCCGGCUCUCCGCAGC  
>P5401  
AGCGUGGGCGCCGCCCGGGAGGCCUGUGGGUGGCUCCGGA  
>P5402  
AUACAGAAGCACAGUCAGCAAAGCAAAGACCCUCGGGGC  
>P5403  
CCGACAGGAACGGCUGCGGCAGAAGCAGGAGGAAGAAUCCU  
>P5404  
UUCAGAUGAGAUUCCCAUCUGAAAAGAUGGAAGAGGAAG  
>P5405  
AAGUGCAAGCUAAAAGAGAAAGCUCCAAGAAGACAAGCCU  
>P5406  
CGAGAUCAAGGCGGACAAGGAGAAGGGGUUCCGGGUGAGAG  
>P5407  
UGUCGGUGGGGAGGGCGAGGAGGGCGGAAGGACUGCAGCA  
>P5408  
GCAGGGCCGCGGAAGCCGGAGAGGAGAAGAAGAGAAGGAG  
>P5409  
GAGUCCCCACCACACAGCGAAGGCCGCGCCUCAGCGUUUCG  
>P5410  
CAGGAACGGCUGAAACGAAGAAGAAGAGAGAGAGAGAAGA  
>P5411  
CGGCGCCGGCCUCGGGCUC AUGUCCCCGUUGAACAGAGCC  
>P5412  
UGCGCAGCGGAGAGCCCGGAAAAGCGGGAAAUGGCGGCGC

>P5413  
GGAGAGGAAGGCUCAGGGUCAGGGAGGUCCAGAACAGGGAG  
>P5414  
CCGCUACCAUGAGGCCCGGAAAGCCUUCUGCUCCUGCUG  
>P5415  
GAGUCAGUGCGCAGCAGGGCAGGUUCCUGCGGAGCCGCCGG  
>P5416  
CUUGGGCAGCUGUCCGGGAGAUUAGAGGCCAGUAUGUACCA  
>P5417  
UCGAACCGGGAUGGCCGAGAAGAAGCUGGCUGAUUGCGAGA  
>P5418  
AGCCAGCGAGGAGCGGCGGCAGAGGAAAGGCCAGGCAGGCG  
>P5419  
CGAAGUUGCGGGGGGGUCCCAGCUCUUUCUGCCCUACCGC  
>P5420  
AGGGGAUGGAAGACGCGGGGAGUGAGCUGGGUGGGCCUGC  
>P5421  
CUACCUUGUCACACAGCUCUAGACCUGCUGUCUGUGUCCUC  
>P5422  
ACUGGAUCUGGCAGUACCAGAGCAGCAGCAACAGCAGGAGC  
>P5423  
GGACGGGCGGACGGCUCUACAUUCUCCAGUGCCAUGGCCA  
>P5424  
GAGAGAGAGAGAGUGAGAGGAGCCGCUGAGCCCACCCGAU  
>P5425  
UCAGGGAUGGCACAAAAGAAUAUCUUCAAGCAAAAUUGAC  
>P5426  
CUUUAUUUCCUUUGCCUGGAACAGAACGCCGCGGUCCGUA  
>P5427  
AAGCCAGUGUGUUAGAAGCAAGUUGAUUAUUAACACUGAGA  
>P5428  
GCAGUCCUGGAGCUGUGAGGAGAUUCGGGCCGUCACCCUGC  
>P5429  
AGCGAGUGUGGCCUCGAGACAGUCCUGACCGACGCUGCUAC  
>P5430  
CCUUAGACACGGCUUGUACAACGUCUCACGUUUUCCAUG  
>P5431  
GACACGGGCCAGGCAGGAAGAGGGUGCGGACGCCAGUGAGG  
>P5432  
CGAUUUUGACAGUGGAGAUGAAUCCAGAAGCGGACAGAC  
>P5433  
UGACAGGGCUUUGCUCCUCCAGAGAUUAUCUGCAUCCUCA  
>P5434  
GGAGCCGGGGCCGGGCGCCAUCAUGCUGAGCCGGCUCGGG  
>P5435  
CGAGCUGAGCGCCGAGCUGGACAAGGACCUGCGGGCAAUUG  
>P5436  
GGAAAUGAAAGGGCUGUGGGAGGAAUGCCUGUGAGUCGUGG

>P5437  
AGUCCUCCCUGCCCGCCUCCAGGGCCCUGGCCACCCCUCCC  
>P5438  
UCUUGAAAGCGGAGAACAGGAAGGACAUGC GCUCCUCGUCC  
>P5439  
GGGCCUGGGAUUCGCCAGCAACGCCUUC CAGGUGAGAAGCC  
>P5440  
GGUCCCACUUGUCGUCGCAGACGGUCCCCCAUUCUCCAUUU  
>P5441  
AGCCGCCCCUCUGCUCGAGAAAGGGGCUCAGCGGCGGCGG  
>P5442  
GCGGCGGCCGAGCCCGAGGAGCUGUAGCAGCCUAGUCGC  
>P5443  
AGGGAGGGGAACGUGUGGGCAAGAGACUUC CUGGUUUC  
>P5444  
UGGCCGAGGAGACAAGGCAGAACGAACUUCUGGCCGACGAG  
>P5445  
AGACCUAGCAGCAGAGAAAGAUGCAGAGAU CGUGAAGAGA  
>P5446  
UCAGGAAGUGCAAGGGAGAGACGGGGCAGGGCGGGCCGG  
>P5447  
UUGACCAUGCACAUCUCCACAGACAGUAACAGGGCAACGAA  
>P5448  
UAGAAUAAUAAUCCUUGUUAAUAUACUUGUGGCGUUGCA  
>P5449  
CCCGGCCUCCAGCUGACAGGAUUC CUCUCCUGUUUCUG  
>P5450  
GGCCGCACCGUGAGGGGAGGAGGCCGAGGAGGACGCAGCGC  
>P5451  
GUGCUGAGAGGAACCU GCGGAUCGGCCGAGAUGGGGUCUG  
>P5452  
GAAGUGGUAGCCAUGGAUGGAUGGGCUGACUCGUAGCGACG  
>P5453  
GCUGUAGUCUCGCUGAAUGAACACCUUUC CGGACACCGGCG  
>P5454  
CGUGGGGACGCAGUCGGGGCAC CAGGAAGCGGGAAGACAGA  
>P5455  
GGUGAGCUUAAUGAAUGAGGAUGAGAAGACUGUUGUCCGGC  
>P5456  
CGCCGCCGCUCUGUCGGGGGAUCCGGGGGCCCGCGCAGCUG  
>P5457  
CCCGGGUGGCAGGAGCCGCAAGAGGCUUGGGCUGCAGGUAG  
>P5458  
GCUGC GGAGCAGGGCAGGGAAGCCGGGAGGCGGGCCCGGCC  
>P5459  
UAACGGUCCGGCGGGAGGACACGGCGGUCCCUACAGCAUCG  
>P5460  
CCAGCACCCAGGCCGUCUCCAGCUCCAACACGUC AAUGGC

>P5461  
AGGCCUGAGCCCGGCGAGCAGGAGAGGAGGUCUUCGGGC  
>P5462  
GGCUCGCCGCCCGCAGAGUAGCAGGCCAGCACGCACAGC  
>P5463  
UUCGCUGAGAACCCAAAUGAGGGCCUCGCGCUCGGGAGUC  
>P5464  
ACGGCUCCAAAGAAGAGGGAAAUAACAAAUAUAUUCUG  
>P5465  
ACAUGGUUUAAGGGGCGCUACGGGGUCCGGCAGAGCCUGU  
>P5466  
GAUGGCUGAGAGGCAGGAAGAGCAGAGAGGGAGCCCGCCU  
>P5467  
AAGGAGAAGAUGUUGCUGCCACGAUCAGUGCCACAGAGACC  
>P5468  
CGGGACGCGAUGGCGGGCGGAGAGCCCGCGAGCUCGGGCCA  
>P5469  
UUUUA AUGGCUUUUCAGCCA AAUUCAGGGCAUGAAGAAUG  
>P5470  
GAGGAUGAGGAUGAUCGACGACAGUAGACAGUAUUCUGA  
>P5471  
CCUCCGCCAUCGUUUCUGCGAGGCUAGGGCGCCUGCGGC  
>P5472  
ACGUCCUCCUGACUAAAGGAAAACGAACCGUGCUGUAGC  
>P5473  
AGAGACCGGAAAGGGAGAGAGAAAGGGAAAUGAGGAGGAG  
>P5474  
AGAAGAGGAUCAUCAUGAUGAACAGGAAGAACACGGGGAAG  
>P5475  
GCGGCCGAAGGAGAAUAGAACAGCGCAGGCAAAAGAAGAA  
>P5476  
AUGAGAAAUGGAGAGAAGAAACUCAAGAAAUAGUGAGCA  
>P5477  
UGAGGACCGUUACCUACCACACUCUUCGGCUGCCCGGACUU  
>P5478  
GGGAGCUGCUCGGAAGCUACACCUCGCAAGGGCUCSCCCCU  
>P5479  
GGAAGGGGGGAGCGCGGGGAGGAGGAGUACCUCGGCCAAG  
>P5480  
GAUUGUCAUGGAAGUCAUGGAGGAGUUAGAGUGCUGAGCUC  
>P5481  
GUGAUCUGGGGGGAAGGAAAUUCSCGUCGGCGGCCAGUAG  
>P5482  
UAGUGGACAGCAGCGGGGCCAUUACCUUCCAUGGCCGGCUA  
>P5483  
AGAAGAGGACCGCCGCCUUGAGGGAGGGUGGAAACUGGGU  
>P5484  
AGGUGGGUCUAGGCAGGGGAAUUGGGGUGCCACCAGACGG

>P5485  
UACAACAUUAACCUUUAAAUAGAGAUCCUAAUUCUUAAAA  
>P5486  
CCCGUCGCGCGGGUGCCCGCAGCCGGCGGGCCCGACCGCGA  
>P5487  
UGGCGCACAUGGACACCGUGAGGACGCUGUGCUCGGCUGAG  
>P5488  
UGUGGAGAUCAGGGUCGGGGAGGUCAUGAGGUAGGUAGGGG  
>P5489  
GAUCAGCAGAGCAGGCAGGCAGAGUGGAGAGGGAGAGACGG  
>P5490  
ACUUCUCUACGUCUUGGAGAUCCAGGUCGGACGGCUGGGA  
>P5491  
GCGAAGUUGGGAACCCGCGCACAGUUUAGCAGCCGCGGA  
>P5492  
GGGACACCUUACCUGGCUCCACUGCCCUUCUGCGUCCUGCG  
>P5493  
GCUGACCCCGAGGGACCCCAAGCGCAGCGGGUGCGGCGAUG  
>P5494  
UGGCCUGAAGGAGGGCGACUACAUUGUGUCAGUGAAUGGGC  
>P5495  
CGGCGCGGCGUAGUGGAUGCAGCAUCCUAGUGGAGGACGCC  
>P5496  
CCCACUCUUCGGGCGCCCUACACCUCCCCGUGCCUGUGAG  
>P5497  
UGCCCUCCGGCAGCCAGAAAACUACAGCAGAAGAGAGCGCA  
>P5498  
AGACUGGGGGCCUGGGCAUCAGCAUUGCGGGCGGCAAGGGC  
>P5499  
GGAGCCACAGGGCCCUCCCCAUCAGGCUGCAUGCCCUGCAG  
>P5500  
GCAGCCUCAAGCAAUUCUCAAAAGACCAAGAAGAACCAC  
>P5501  
CCCCACACUCACUCCUGAGACCCUGGCCUCCGGCGUCAG  
>P5502  
ACAGCGAGCUGACCACACUGACGAGCCAGUACAUCAAGUUC  
>P5503  
CGGGCAGUCAGUGCGGGGGCAAGGCAGCAGGCAGGGUACC  
>P5504  
AAGCAGCGCAAUCUGUCCUGAGGCUGGCAGCAGGGCCAGGG  
>P5505  
AUUCGCAGCUUCUCCAGGCCACCUGCAUCCUUGUCUCAGA  
>P5506  
AAUCUUCAGGCCUGAGAACAACACUCUCCUCGCUGUCGGAG  
>P5507  
GCCCGCACCCGGCCGAGCCAGCGUGGGCCUGCCGGGUUC  
>P5508  
CGGUCUGGAGUUCUCAUGUACUGCAACUUCUUAACAACA



>P5509  
GCUCUGUUCCAGAGGACGACACCGAUGGCCUGACCCCGCAG  
>P5510  
CCUGGAGAGGCACCAGAAAGAGGAAUGCCAGGACAGGUAAC  
>P5511  
GGAUGAGACCCAGGGACAGCAGCCCCUCCAGUUGGAGGAGG  
>P5512  
AGGGCUGGGGGCGGGGGGUGAUCACUUCAGCAGGCACAACA  
>P5513  
UCCGCGCCUGGGCGUGGCCACACAGACGGCCAUUGCGGCG  
>P5514  
ACCCCAGCUCGGGAGGGAGACUCCAUCCUACUCCACCCCA  
>P5515  
CUGCCCACAGAGGUAAAGACAGGUCAGGUAGGCUGAGAGA  
>P5516  
AAGGAGUUCGGCAACUUCAGCAGACAUGCAAGCCUGGA  
>P5517  
CUGCAUGGUGCCCUUCUGCCAUUCCCCGAGUGUCUUCAUC  
>P5518  
ACAAGCAAGCCAGGCAGCCAAAGAGAAGAAGAAGAGGAGG  
>P5519  
UCCUCCUCUUCAUUGC UUUAUCCUCACUCUCUCCUCUUU  
>P5520  
GCUUUUCCCUUUAACUCCAUUCGUAGCAACUCUGGAAAAC  
>P5521  
AGCAACCGCCUCCGAUCACCUCGCCUCCAUCUCUCCUCC  
>P5522  
UUGGCGGGCGCGGCGGGUACCGGGAGGCGCAGUGAUUA  
>P5523  
UGACCCUUCUACCCACCCAGAUUUUAUCACUUCGUCGG  
>P5524  
CUGCUGCUGCUGCUGCUACUGCUGCUGCUGCUGCUGCU  
>P5525  
AGGGUAAUGAAGCUGAGCCCAGGUCUCCUAGGAAGGAGAGA  
>P5526  
CCCUGAAGAGGCCAGCACGAACCGGAGGGCUAGAGACAGCG  
>P5527  
CCGCAGCCGCUAGUGCUUCCACUGCUGCCGUGGCCAACGC  
>P5528  
CAGGUGGGGCGUCGCUUGCCAUCCACGCAAGGGACUCUGC  
>P5529  
GAGCUGGCGCAGCCGGGGUAGUUACCGCUCCUCCGCCUCU  
>P5530  
GCUGGAGAGCAGCUUCGCGGAGCGACUGGAGAGCCAGAGGU  
>P5531  
GAGUCGUGGACGUGGAAACAACAACCGGAAAGGAAGAGGCG  
>P5532  
UGUAUAUGAUGACUUCAGUGAGCAGUGACCAUUGUCGAGGU

>P5533  
GCUCCCGACAGCCCCUAGGGAGAGCGAACGCCACCACCUC  
>P5534  
GCGGCUACAGGCCCGAGUGGAGAGCUGGAGCGCUGGGUGU  
>P5535  
GCCUGCUGGCGUUGCUGAGGAUCGGUUCCACUGCGCGACAU  
>P5536  
GAGGAGACAGAAGAGGUGGCAGAGGCAGCCGGGGCUCAGG  
>P5537  
UGCCGGGAGGAAGGAAGCGCAGUGACAGUGCCUAAGUUGGA  
>P5538  
GAGCGGCGCCCGACAGAAGGACAGGGGCCUGCUGUCCUGAG  
>P5539  
UCCCUUCCCCGCAGCUGUGAGGUGGAGCAGUGGGACUCGG  
>P5540  
GCAGGCUCGGGCUCCGGUUCAGGAUCACGCUUGGGUUCUGG  
>P5541  
GGGAGGCAGAGCAGCGUCAGAGCCGCGCAGGGGACGGGAGU  
>P5542  
CCAGGAGGAGUAGGAGCAGGAGCAGAAGCAGAAGCGGGGUC  
>P5543  
GCCGAGGAGGAGGUGGAGGGAGGACCGGCGGCCGCAGCGGC  
>P5544  
CUGACCCAUGGAUGAUUCUCAUCUGCUUGAUAAACGUACUC  
>P5545  
GCGGCCGGAGCCUCGAAAAGAGGUGAGUGGGCGGCGCGCGG  
>P5546  
GAAGUGGGCAGGACUUGGACAAACUUUCCACCGGCUCCGC  
>P5547  
AAGAGAGGACGCGGUCGAGUAGGUGUGCACCAGCCCUGGCA  
>P5548  
CGACGAGGUCCUCGAAGUGGACCCGUUUGCGAAGCGCCAGG  
>P5549  
CCAGGCACGCGAGGCCCCUCAGGUACGCCUCUCUUCCUG  
>P5550  
UGAGUCCUCCACUUCCCCGCACACGUUUCCUGGCUGUCUA  
>P5551  
GGAGGAGAGCCUGAUCCAGGAGUCGGCCUCCAAGGAGCAGU  
>P5552  
GUCCUGCACCAGGCGGUCACAUAUAGGUCUGAUCUAAAACAG  
>P5553  
UUUUUGAACCUCAGGUCACGAAUGGAUUGGAGUGAACCGG  
>P5554  
GGGGCAGAGCGGUGCUCAGGAGUGCGGCCCGGGGCCCGCGG  
>P5555  
UCCUCCUUCUUUUCUCCUUGACCCUUCACAUUCUCCUCAU  
>P5556  
GUUGCAACAGUGAAGCAGAUUUCUUCAGUAAAUACCU

>P5557  
CAGCCCCAAAGAUAAUUGACACAGGAGGAGGCUUCAUUUUA  
>P5558  
AGUAGCCAUGCGCGGCUUGGAGGAGUCGGGGCCUCGGCCUA  
>P5559  
AGCACGGGUGUUGCCCGCCCACCCAGCGCCCGGGACACAGC  
>P5560  
CAGCGGCGGGCGGGCAGAAUCCCGGCUCCCGGCCCGCGC  
>P5561  
CCGCCGCCGCCGCCAGCACGAGGAGGAGCAGCCGGGGA  
>P5562  
ACUUUCUAUCCGUCCGCGUCAGCGCCUUGCCACCCUCAUCU  
>P5563  
CUAGGUUGGGUUGGGUUAGGAAGGGCUGGGCUCCGGGAGC  
>P5564  
CAAAGGCAGGGAACAGAACAACUCUCUAGCCGGGGCCGCUA  
>P5565  
GCUUCUCCAGGCCUGUCUACACCUCUUCGCCCUACUCCAAG  
>P5566  
AGUGGAGGGGCCGUUCGAAGAGUCGUGAGGGGGUGACGGGU  
>P5567  
CGGAACCUCGGCUCSCCCCCAACGAAACUACUGCUAAGCCA  
>P5568  
UUGUAAAAGACACUGGCACC AUGUUUGACUAAUACCAUUC  
>P5569  
CGGAAACCUCGCAGGGUCAGACCGUAGCGACGCGGGAAGUC  
>P5570  
AUGCUGCUGCGCUUGGCCUCACUGCGCUCUCCGUAGUUGUC  
>P5571  
CUCGGACUGAGGCCAAGAUAAACCAGCCAUGCCAGUAAGCCG  
>P5572  
CCAGGAAGCCCAUCUGGUCCAGCGAUGCCCUCGAGGCCUCG  
>P5573  
UCGGGGGCGCCGAGCCCCUAUGCCGCAGCCUCUGGGCACC  
>P5574  
GGAGUCUGGCCACCAGGCGCAUCGGUGGCGGAGGCGGCUGC  
>P5575  
UUCUGCAGAGAGCCCUCUGAAAGGAUGGAUGCAUUCUCCA  
>P5576  
GAAGGCUUGUUCUCUGGAACACACCUGCAAGAGAAGAGGAA  
>P5577  
AGGUCUAGCGGCGCCAUUUUAGAAUAACAAGCCGCGGCAA  
>P5578  
CAUGACGCCCGAGGACCCAGAGGAAACCCAGCCGCUUCUGG  
>P5579  
UGAGGGUUAUGGGGAGCCUGAGGUUUUAUGGGCCUGUGUAU  
>P5580  
AAAGCAGUACGACUCGGUGGAGUGCCCUUUUUGUGAUGAAG

>P5581  
AGGUGAAGAUGAUCAGGCUAACGGCGACGAGGCCGAGUCCC  
>P5582  
CCUCUUCUUCAUACCCUCGAGCAACCCACAGCGUCCACU  
>P5583  
AAGCGAUGUUUCCCCUCGAAAGGCCGUAGGCUACGCCGUCA  
>P5584  
UUCUUGAAGACAUCCUUGGCAUUCUUCUUGUUGUUGGCGCC  
>P5585  
UCUCGUGCUCAGUCUCAGCCAGUUCGUGGGCCACCUCUCC  
>P5586  
GCGCAUUUUGUCAUUUCAGAAAUGGACCCAAGUGGGGUCA  
>P5587  
ACACCCCAACCAAGCCCCACGCCUCUACCUCCCCAGGA  
>P5588  
UUGGUGCACCGCAGACCUGCAGGGGAAGGCGGGAGAGCUU  
>P5589  
AGAGGAGGAGGCAGCGGCAGAGAAGGAGGACCGCGGUGAGC  
>P5590  
CGGCCGGGCGCGGCGAGCCCAGGUGAGUGGACGGGGUGGGG  
>P5591  
AGGGAACUCCACCGCAGGUCACUUCUGCGGCCUGGGAGCUG  
>P5592  
UCUCAUUUJGCAGGAGCAGUAGAGAACUGUGGACUAUUCUG  
>P5593  
AGAAGAACGGUUCUGGGGAGCAGAGGCCAGGACCAGUG  
>P5594  
CCCGGGACCGAGAGAAGAAGAUGGGGAAGAGGAAGGGAGGG  
>P5595  
UUCAGAUGAAGACAGGUGGUUGGUGGAUAUGAAGAAACUG  
>P5596  
UUCUUUUGCUGCUUGGGAGACUGGGGGCCGUUGGGAACAG  
>P5597  
GCUUUAGGAAAUGUCUACUGAGGACCCUGGGACUUAAGAAG  
>P5598  
CACACAGCCGGCUGCCCUUGACCCGGGAGGCCCCGGCUCUC  
>P5599  
GCGACGGCGGCGGGGGCGGUAUGGCGGAGCUGGUGCAGGG  
>P5600  
GCGAGAGACUGGGCCGCGACACUAAGAAACAUCUAGUGGUG  
>P5601  
CCUCAUCUGUCCAGGCUGCGACAGUGACUGUCAUGGGAGCC  
>P5602  
AGCGUUGGCUGCUUCGACACACUGAGGGCGGCGCGAUGGGA  
>P5603  
GGCUGUCCUCUGACCCCAAAGGCUUGCUCUCAUAUAA  
>P5604  
UGAUCCGAAAACACUAGAACAAGAGUGUGGCAAAGAACC

>P5605  
AGGGACGCCGUGACCGCUGAGGGAUCUCUGGGAUGUCCGU  
>P5606  
CGUCCACAAAGUACUCCCAAGGCCUCGCCUCAAUUGUUC  
>P5607  
CGACGAACGCCUGCUGCAGGAGGCCUGAAGCGCAAGGAGA  
>P5608  
AAGAGAAGGCUGCUGAGCACAGGCCAAGUCCUUGGGGGAG  
>P5609  
GGUCAGGACUCCCCGAAAUCAGGCACCCUCCUGCCCCACUG  
>P5610  
GUGCAUCCUGACAGGUCACGAGCUGCCCUGCCGCCUGCCGG  
>P5611  
CGAGCGAGCGAGCCGAGCCGAGCCUCCCGCCGUCGCCAUGG  
>P5612  
CUUGGAACCUGAAGGAACAGAGCCCCUGCUGGCCUCCUGGU  
>P5613  
GGCCAUCGGAAUCCAGGGAGACCUGGGCCCCAGGGACCC  
>P5614  
GCGGCCUUCAGGCGGCGGGCACCGCGGCGGGCAGGGGCGCC  
>P5615  
GUGGAGAAGAUGGAGAACCAAUGAAAGGACUGGAGUCCAA  
>P5616  
CGCGUCCCACGUCCCGGGGGAGGCGGCGGGCCGGGGGCGGG  
>P5617  
AUGGCUGGGACGCGGGGCAGAGCGAGGUCUCCUCCAGGCC  
>P5618  
GGAGAAGAUCUUCGCGGGCAAGGUGCUGCGGCUGCACAUCU  
>P5619  
GCAUGGAUGGAGGGUGCCUGAGGCUGCAGGCAGGGGAUGAC  
>P5620  
CUGGGAAGUGUUCAGGCCAAGGCUGGGGAGGCUGGCCAG  
>P5621  
AGGGGCUGCCAGGAGGACACAGAUGGACGCCUGCUUCGGGU  
>P5622  
ACCCAGGGACUCGGGGAGUAUGCCGCAUGCCAGUCACACG  
>P5623  
AGCUCAGAAGCGCACACGGCAGCCACGGGGCAGCGGCAAAG  
>P5624  
CGGAAGCCUUCGGUCGGUGGAGAGGAGAAAGGGAGAGGCCU  
>P5625  
AGCCCCAAGGGUUGCCGCGCAGGUGCAGCGGUCUAGAGCG  
>P5626  
GUGGUUCGUGGAGGUGCUGCAGAACGAUCUGCAGGCCAACA  
>P5627  
GGAGCUGUGCCGGCAGAUCAGGAGGAGGAGGACGAGAAGC  
>P5628  
GCCACCAAACGUCAAUUAGAAUGAGACAUGUGUUGAAA

>P5629  
CAGGCACCGCAGUACCUGGAACAGGUAAUGACGGGCACGGC  
>P5630  
GCGUGUUGUGGUCAAUGUAAAGACGCGACCGUCGUAGUCU  
>P5631  
AUUUAAAUCCACUCAGGGGAGAAAGUGCUGUGCUUCGAGC  
>P5632  
GCAGAGAGAAGAAAGAAGGCAGAGUAACCUACAAGAAGUUU  
>P5633  
AGAGAUGGUCAGUGGUUUUAAGCCGGGAUCAUAAACACUGU  
>P5634  
CCUCUGCCCGCCGUCGCCAUGAUUCCGGUGUCGCUGGUG  
>P5635  
GGGAGAUUCGGGACCAUGGCACCUGUGCACGGCGACGACUG  
>P5636  
AACAGAGAAGAGGAGGAGGAAGAAGAGGGGAAGUAUCAGGA  
>P5637  
GGAGAAAUGGAGAGGCCAGGAGAGGGAGAGAAGGAACUAGC  
>P5638  
GGCCGCAGCACUGCGGGGCGACACGGAACGGGCCGGCGGGA  
>P5639  
GAGCCCCAGCCUGAGGGGAGAGGGGAAGAGGGCCGUCGCC  
>P5640  
GGCACGCAGGACUGGGAUCGAGGCCAGAAAACGGAGCAGC  
>P5641  
CCUGGCCUAGAGCGGCCUUAAAGUGCCAGGGAGAGGAGGG  
>P5642  
UCUCCAGCUGCAGGAGGAAGAGGCGCGGCGGCUGAGCCCC  
>P5643  
UCCUCGCACCUGCCCCUUAUCCCCUCCUCGCCCCCGCCC  
>P5644  
UCCUCCCCUUGCUCGGUCCGAUAGUCCUGGUCCCGAUAGUC  
>P5645  
AUGGAGACGGCGGCGGCUGUAGCGGCGUGACAGGUGAGGGC  
>P5646  
GACGUUGGAGUGGACGUGGAGCGGAUGCGCUGUAGGGGGG  
>P5647  
CCCCCGCCCCUAGCGUGGACAUUUUAUCCUCUAGCGCUCAGG  
>P5648  
AGGGGCGGUGUCUGUUCUGAUCGCUGUGUGUCACCCGGGC  
>P5649  
GGGGCCAAGCCUCCUCAACUAGACCUCAACCGGCCAGGAU  
>P5650  
CGUGUGGGCCCAGGUUUCGUAGCGGCGACACGAGAGAGACG  
>P5651  
GGGCAGACUGUCUCACCCGCACUGGCGGUCCCCGGCUCAA  
>P5652  
CCUGGAACUCCGGACAAACAACUACCAGCUUUCAGAUGAAC

>P5653  
GCCGAACACGGCCCACGGGCAGGGCGCCGAAGAGGAGCAGG  
>P5654  
GACCGCCCUACCCCCACGCCAGCCCCAAACUAAGAUUCCC  
>P5655  
UGAGCAAGGCAAGAAGUGGGAUUCAGGAAUGGGCCAAGCCA  
>P5656  
AGGGCAGUGAUGAUGAUGGC AUGAAGGUGACAAUGAAGGC  
>P5657  
CACAGACACCAGAGGCCUACAGCAAGAUCUGAAGGAUACGC  
>P5658  
AGGCAACCACACAGUUUGGAAGAAACGGAGCGGGACGAAGA  
>P5659  
GCCAAGCGGCGUAUUGAUGAAUCAUAAGGAGCUGAACCA  
>P5660  
UCAACAAGGAACUGGCCUCAAGAACAAGGAGAUCGAGAAG  
>P5661  
GCGAAAGAAGGAAAUGGUGAAGGCUGAAGAGGACACACAGU  
>P5662  
CUGGGGAACCCGGCUUCGUCACUCGGAUGUUAACUAAAGGC  
>P5663  
CAAUCCAACCCCCUCCACCACCCCAACGACUCCGUUCUC  
>P5664  
GAAAGAGAGAGCGCGAGGGAAGGAGGAAGGAAGGAGGCACC  
>P5665  
AGGGAUGGCUGCAGCGGCAAAGGCGCAGGCGGCGCAAGUC  
>P5666  
GGGAGGAGAUGGCCUUGCCAGAUGAUGAUGACGAGGAGGA  
>P5667  
CCACGGCUGAGAGCGCCGCCACCGCAGCUGCUGCCGCCGUC  
>P5668  
GGAGAAAGAGGUCUUGCCAGACCAGGUAGAGGAGGAGGAAG  
>P5669  
CCUCGCUAUUCUCUUUGGGACCAGAGGGCGACAACGCAGC  
>P5670  
GCUUUGAGGCUACAGGCUGUAGUCGGGAAGGGGAUCGGAGA  
>P5671  
CCCAGUGAUUCCCCAGUCCAUUUGACCCAUUGACCCUGCC  
>P5672  
GGGAGGGGGAGGGGACCGGGAACCAUUUGAAUGAGAGGAGG  
>P5673  
AUCUCCUCGGAGUAACGGCGACGCUACACGGCCUCUCCCGU  
>P5674  
UAUGCAGUGCAUAUGCUUCAUCAAAAGAAUGCACCAUACUG  
>P5675  
CCCAAUUCUCUAAUAACCUCACUGGAGGUUAACCAGGCAGG  
>P5676  
GAGAGACACGCCUGAAUGGCAGCAGCAGGCCUAGCGGCAA

>P5677  
AAAAGCGCCGGCACUCCGCGAAUUCUGAUCCGGCCUUUAGUC  
>P5678  
AGUCUCCUGGAAAAGGCAGAAAGAAAAUUCGGAAGAUUCUU  
>P5679  
AGUUGGAAGAAAAUCAGCGGAGCUAUAAACAGAAAAAGAAA  
>P5680  
GUUGUGACUCUUCAGAGGAUAAAAGAGUAAGAAUGGAGCA  
>P5681  
GCACUGGAGUCUUAGUCGUCACUGUAGCUGCUGCUGGAACC  
>P5682  
GAGCGAUGGAGGCCCGUGCAUGGAAGUCCGAGGGAUGGAG  
>P5683  
GUUUUCUCCUUCUCUCGUGAAACUUGUGCCGAAACCUACA  
>P5684  
GGAAUCCAUGAGACAAGACAAGGGGGGCAUGGUGUGAGAA  
>P5685  
CGAGGGAAAGCCAGAAGAUGAAGUAGAGCCUGAUGAUGAAG  
>P5686  
GCCUGGGAACAGGAAGGAGAAAAGAAUACCAAAGUGACA  
>P5687  
GCUCAUCUACUCCUCUUAUCAUUUCUUCAGGGUCCAAAUGC  
>P5688  
GGAGAAGGAGAAAAGUGCCCAGAUAUCCUUCAGGUUAGUAU  
>P5689  
AAGGACUCUCAGGAGGACUACAAGAAAGGCAUCUGAGCAG  
>P5690  
AAGAGAGGUAGACAGAUACAAGAUGAAAUCCUGUCAAAAAA  
>P5691  
GGUGGUGACGCGCGGCCUCACGUGACCCAGAGCUGCAGAG  
>P5692  
GACCUGGAAGAAGCUGGACCAGAAUUAGGAGCCCAGGAAC  
>P5693  
CCCAGCGCUCUGCGAGGCCUAAAAGGAGGAGCAACCUGUC  
>P5694  
UUCUGUAAGUCCUCCUGAGAGUCCUUGGGGAAUCGUCCG  
>P5695  
GGCCCUUUCUGUGGCCUCAGAAAGCAGCGACAGUCGCAG  
>P5696  
CGGAGCGUCGGCGACUGCGGACAGGUUAGAGUGGGGGCAGG  
>P5697  
AUGUCCUGGAGGAGCUGGAAACAGAAGGGGAGAGGCAGCUG  
>P5698  
CCCGCUGUAGGCCAGGUUGCAGACCAUUAGGUUAGACACAC  
>P5699  
CUUUGGGGAGGGGAGGGGGAGGAAGAGUAGCUCCUUCUU  
>P5700  
ACCCUCUGCUCGCCCCGACCACUUCACCCUGUCCUGGCGCA



>P5701  
AGUCUGCUCUGACACUCGGGACCGGGAGGAAUAUGACGACG  
>P5702  
GGCAGCUCAGAAAAACUGAAAGAAAGAAGAAGUGGUCAA  
>P5703  
GAAGAGAGGAGGAAAUGGAAAGAAGAAGAGAAACGAAAAAG  
>P5704  
GGCGGCGACGGCGGCGGUACACAACAGCUGCAACACCAGG  
>P5705  
AAAUAUCUUGUACCAGCCCAGGGGUGAAGAAGCCCCGGC  
>P5706  
GGUGGGUGUGGGGACGCGGGAGCCAGUGUCGUCGGAUCGGC  
>P5707  
CAAUGAGGAGGAGGAGGAAGAAGAGAGGAGGGCCUGCUGA  
>P5708  
GGCACCAGCUUCUGCUUCAAGCACCCGCCAGGCCUCC  
>P5709  
CUCCCCUCGAGCCGCCGCGAUGUCCCCUGCGCUCUGUUC  
>P5710  
GGCCCGGGCGGUCGUCGUGGAGGAACCCGAUCCCUUCCC  
>P5711  
CAGCAUUGAACUAGUACCUAGCAAAGUAGGUGGACAUAAA  
>P5712  
AGAGGGAGAGCUUCCUGCGCAGAGGAGACGGACGGCGGCGU  
>P5713  
CCCAGCUUUAUCUUUCCUUGAGCUGUGACUUCACCCAGCAU  
>P5714  
UCCAGGCCGAGACGCCUCUUCAGCAGAGUCACAGGAGUU  
>P5715  
UCCUGCUCACCUCCCAGGGACGGCAGAGAAGGGCUGGCC  
>P5716  
AUUGC GGGCGGCGAUGCGGAAGAUGAUGGCGGGCUUGGUGG  
>P5717  
UGUGGUAAAAGCCGUCCGGAAGAAUGGCCGCCGCCGCCGCG  
>P5718  
AAACCAGAGACGAGAGGGAAAGUGAGACAGAGACGGACAGA  
>P5719  
CGGGGCUUCGGAAGGAGCCACAGAGAGGGCGGGGCGUAGG  
>P5720  
GCCUGGCCAGGAGGGGCCUCAGGAACCCGUUGGCUCACGAU  
>P5721  
GAAUUUGUCUCCUUAUGCCACCCACAGACCCGCCAUCCCC  
>P5722  
CCUUGAUGCAGGAGUAUGUCAACAACAGGUGAGGAUGGGAA  
>P5723  
AGUUGAUCAAGAAGGAAAAGAGAAGAGUAAGAAGGACAAG  
>P5724  
GAGUAGUGAAGGCCACUUGAAGCUGGAGGAGAAACUAAAGC

>P5725  
GCAGGCGGUGCAGGCGGUUC AUCUCGAGUCUGACGCUUUC  
>P5726  
GGGUGAAAGGCUGCCUCCCG AGACUCUCCUUGCUUGGAAU  
>P5727  
GGACGAGGAGGAGACGCCGU ACCUGGUCAAGCUGCCCGUGG  
>P5728  
AGGGCGCAGGAGGCCUGAGG AGUGGCUACUGGAGCCGUGUG  
>P5729  
CAACCCGGCUGAUGAUCUCU AACCCGCACAAUCAACCCAGC  
>P5730  
GCGCUGCGCCCCGCGCCUGC AGAGCCUCAACCUCACCCGCA  
>P5731  
CGCUCGGGGUCCCGGUCGCG AGGAGGAGGAGGAUGUGGCGC  
>P5732  
CCACCUGGCUCGCUUCCCCU ACCCGCCUGGCACUCUCCCCA  
>P5733  
GCCUCGAGCUGCCUGAGCUG ACACGAGGGGAGGGGUCUGUG  
>P5734  
ACCUGGAUACCUGUGAGGUC ACGGUGGAGGGAGAGGAGCUG  
>P5735  
GCGGGGAGCUCCGGGGGUCC AAGGAGGAGCCGCCGCCGCCG  
>P5736  
ACCUGCUCGUUGAUCUGCCC AUCCCCGCCCGGCGGUCCUC  
>P5737  
UCGCCGCCACCGCCACCGCC ACCGCCGCCGCCGCCGCCGCCG  
>P5738  
GGUGCUIIUGGGAACGCGGG ACGGGCGAUCUGCGGCGCCAG  
>P5739  
GCCCCACUGGUGCCCGGCUC ACCUUGGUGCUCGCCUGACA  
>P5740  
GUCUCCUCUAAGGCCACCU AUCAAACCUUCUGAGAAAUG  
>P5741  
AGACGUACACCUUCAUUAUC AUCCAAGCAUAGGAAAGGGUC  
>P5742  
AGCCGGCGCGAUGGGCGGAG AGCAGGAGGAGGAGCGGUUCG  
>P5743  
CUUCCCCCGCUCAGCCCGGC ACCAGAGCCCCUCCUGGGUC  
>P5744  
GGAGUAGGCAGCGCACACC ACCAGCUCCAGCUCGGCCCCGCC  
>P5745  
CUCCAGCGGCGGCAGCGGCG ACGGCGGCGGCAGCAGGAGGC  
>P5746  
UGCCCGUUCUCGCCCGCCGC AAGCUCCCGGGACGAUGGUGC  
>P5747  
GGUUGAACAGGAAACACAUG AGCCUAUCAAAUAAUAAAA  
>P5748  
GCCGGGCGGGCGCGGAGCG AGCGGAGAGCGGGCGGCCGUG

>P5749  
CGAAGAUGGCUGAGAAGCAGAGCAGCACGACGGGCGGGUGAAG  
>P5750  
GCGCCCCGCCCCGGGAGAGCCAGGAGCGCAACAAGCAGCGGC  
>P5751  
GUCAAGUGCUUCUGCUCCUGAUGUGGAUGACCCAGAGGCAU  
>P5752  
CCGGAGCUGCGGCGGCUGGCACAGGAGGAGGAGCCCGGGCG  
>P5753  
GUCUCCAGGAGCCCUUAGAGACCGAGUCCCGGCGGCGACGG  
>P5754  
CGAGGAUGGGACCGGGACGGAGGCGCCCGCACGGAUUCCC  
>P5755  
GAGGUGAAGGAUGAGAACGCAGGCGUAUUGGAGGUGAAGCA  
>P5756  
CUCUGCAUGCCUCCGAUGAAACUCUGCCCCAAAAGCAGAC  
>P5757  
UCAGCUGAAAAGUUGAGAAAUAUGGAGGAGAAAUGUGAAUC  
>P5758  
CAGCACGAAGUCCCGCAGCCAGCGCAACAUGGUCCCAGAGG  
>P5759  
UUAGGCGAGUGCGUGCGCCCACCCUGCGCCCCUCCUCCG  
>P5760  
AAGGAGGGGACCCAGCCCUCAUCCGAGAGACGCAGGAGAAG  
>P5761  
CUUCGGGAGAAAAAGUAUUCACGCCCCUAUAAUUUAAAAAA  
>P5762  
GCGGCUACGCGGGGAUUCUGAGGACCAACACGACUCCACCG  
>P5763  
CGCGAGGUUCUUCUCAUCCCACUGCCUCUAUUUAUUUCUC  
>P5764  
CAAGGCCAUGGGCAUCAUGAACUCCUUCGUCAACGACAUCU  
>P5765  
AGGUGGCAAGAUGGUGUUGGAAGCACUAUGGUGUGGUGAG  
>P5766  
CCCUGAGCCGCCGCCCGAAGAAGCCGCAGCCACCACCGC  
>P5767  
GUGGUGGGCGCUUUGGUUCCAGAGGAGGCCAGGAGGAGGG  
>P5768  
GAGCCUGAAGCUGGGGCUGAGGACUGCUCAGGGAAGCCUG  
>P5769  
GGAGAAAAGGGAAAAGCAGAAAGGAAAAAAGGAAGAGAGA  
>P5770  
CCUGCUGCUGCAGAACCUGGAUCUUGCGCUUCACCGCCUCG  
>P5771  
CAGAGACUGGCGGUGUCUUAAGACUCCGGGCACCGCCACGC  
>P5772  
UAGCAGAAGGAUGACCCAAGACGGGAAGCGGGCUGCUGAGC

>P5773  
ACUAGAAUAUAAAUAUCCGUAAACAGCAUCUGAGCAUUAGU  
>P5774  
CCUGCCUCAGGCGUCGCGUCAGCUCCCGUGUCCGUGCCCUU  
>P5775  
AAAACAAAGAGAAAUGGAGAAGAAAGAAAGCAAGAAAAAG  
>P5776  
GGAGCUAAAGUUGAGGCUGGACCCGGAGCUGAGGUUGAGGC  
>P5777  
GGAUAGUUGGUGCUGUGAUGACUGGGGCAGCUGGGGAAGAG  
>P5778  
GGCUCCCAACUUUGAGGCCAUACCACCGUCGGCCGCAUCC  
>P5779  
UGGAGGAGGAGGCAGAGAGGAGUGGAGGGCGGAGUAGACGG  
>P5780  
AGAAUCUGUGAGUCGCCUGGAGGCAGCGCGGCGGCUGCCGU  
>P5781  
CCCACCCCGCCUGUCCCGCAGCUGCCCGCGCCUUAGUCUG  
>P5782  
GGGACGUUUUUCAGGGCGGAGAGGCGGACGCGACGGAAGC  
>P5783  
GAGGGGGCGGGGCCGCGAGGCCGUGGGUGCGGCACGAG  
>P5784  
CGCCGCCGGGUAUGCGGACAGUAACGAGGGAGGGCUUCGG  
>P5785  
GCCGUCGGUGCUUCUGAAUGAGCCCCACCAGGAAGGUGCAG  
>P5786  
ACUAUUCAGGUAAUUAUAGAAAUGCCAAGUAGGAAUUU  
>P5787  
CCUAUGGGACGCAGGGCCCCAUCUGUCCUCGGUCGCCGUG  
>P5788  
GCGCACGCCUCCACGACUGGAGCCGAACAUGGCGCCGGGAA  
>P5789  
CGGGGGCGACGGCGGCGGCGACGGCGGGGGCGCGGCCCGCG  
>P5790  
GCGGGCGGCGGGCGGGAGCCAGGCCCGGGCGGGGGCGGGGG  
>P5791  
CCUUCGCGGUCCUGCCGCCACCGUCCACGCUCAGCGUUGU  
>P5792  
GUCAUCUUUCACGCCAGCGGAGUUUUAUGACACGGGCUAA  
>P5793  
CAAAGAAGGGGAGCGGGGGCAGAAGGCGCUAGGCAAGCAC  
>P5794  
CGACGAUCAGGGUUUCCAGGAGGGGAAGAUGAGCUCGGGG  
>P5795  
GAAACAAAGGGUGCUGGCGG AUGUCUCCCCUCACGCCCAGC  
>P5796  
UGGCAUGACAGGCGUGAGCCACUGCGCCCGGUCCUGAAACA

>P5797  
GUGGGCUGCAUGGGUGGCGGAGGUGGAGGCGGAGGUGGCUG  
>P5798  
CCUGUGAUGGGUACACCGGG AUGUUUAACCACUGGUUUUCU  
>P5799  
CUCCACUGUAAUUGUUC CCCAUUCCAUUCUCC AACUGAU  
>P5800  
CCUGGAAUAUUCACCCAAC AUCCGUGCCCCGCCUCCUAUU  
>P5801  
GGGCCGGACGCGCUGCGCGGACGGGACGGGGCGAAGGAGGC  
>P5802  
UCUGAAGAAAUUCCGGAGUAGGGCUGAUGGCUGAGCUCUG  
>P5803  
ACCGCUGCGCAGCCGCCCGCACCGCAGCAGCAGCUCAGCAG  
>P5804  
GAGUACCGCGGCGCGAGGUAGUGGUAGCUGGGUGCAGACG  
>P5805  
CCCAGAAGCCACAGGCGCAGAGCGGGGCGGGCAGUGC  
>P5806  
GGGCGCCUCGCCUCCGGCCC ACCUCCGGGAGCGGCACCUG  
>P5807  
UCCUUGUCAUUCUCCUCCG AUUCUUGAUUAUCUCUGUCCU  
>P5808  
GAGGACAGGUCUCAUAGAAGAGAUGAAGAGCGGCCCGGCG  
>P5809  
GCAAACGCGAGGAAGAGCUACGAGAGUAUCAGGAGCGGGU  
>P5810  
AGACGACGACUUCUACUCCAAGUUCUCCACGGGCUCUGUGU  
>P5811  
UGACAGUCUCAGCCAGGUACAUUGGAGGGUCCAGGUCACAA  
>P5812  
CCCGCUGCGGCUCAGCCUCAUCCUCAGACCCUGCGGCAGC  
>P5813  
GCGCGGAGGGGAAGGCAUCCAGGAUGCGGUGCGGGGCGGCC  
>P5814  
UCUGGCUCCAUGUUGGGCCGACAGACACAGCCUCACAAA  
>P5815  
CUGGAUGAUCUCCUCCGUGGACAUCUUGAGCACCUCUCC  
>P5816  
CGCCCCCGCGUCCCCCAGCGCGCCACCUCUCGCGCC  
>P5817  
CCCACCGCGCCCCUCCCCAGCCUUCUCGCCUGCGCUCGG  
>P5818  
CGGUGGCUGCGCGGCGCUGGAGCGGCGGCGGGGCCUUGGG  
>P5819  
AAGAUGGAGGAGGUGGAAGCACGCAGGAAGCAGGAAGAGGA  
>P5820  
CCUGCUGGUUUUGACUUUCACUAUCCUGGUCAUCUCCUAC

>P5821  
CCGACGGCUCCGCCAUGGCUACGCGAGCGAGGGUGGGAGAA  
>P5822  
CACGCACUCUCGUGGCCACAGAUGUUCUGGUUCAGUCGGC  
>P5823  
UGGGGAGACAGCGCGACGCCAGGGUCGGCUACUGGGGGGCC  
>P5824  
AACACGGACGGUCAGGAAUGAGGGGCUCAGACCCCGGGUUG  
>P5825  
UUUGUGGCACAUGUGAGACGAGGUAGACUCUCCACUCUAG  
>P5826  
CUGCCCACCACCCCAUCUCAGAACAGAAGGGUGGGAAGCC  
>P5827  
CUCCAGGACGCCGCCGCCGAGUGUCACUCUCCCGCCGCU  
>P5828  
CACCCAGCCACCACCAGCUGACUCUCCCCGACCCGUCCAC  
>P5829  
GCGGACACCUCGGGCCCGAACCGUCCGUGACUCCACCUA  
>P5830  
CCUGAACCCUGCCCUUUCGAGCCAGCCAGCCUCCUCAC  
>P5831  
GACCGAGCCGAGCCAGGCUAAGGGACCAGUGUCUCCUGCC  
>P5832  
CCUGCAGUGGUGGGCAAAGGACAGUCCGGUGAGGAAGGGCG  
>P5833  
CACACUCAGUCCCCACCACACUGAAUCUCCCUCCUCACA  
>P5834  
AGAAACUGCCGAGGAUGGAGAGGAGGAAGAUGAAGGGGAAG  
>P5835  
CGUGCAGAGGGUGAGGAAGCAGGGGGUUAGGGAGAGUCCA  
>P5836  
GGCAGGUCCAAGGGGAGGCACCAAAGGUGGGCGCAUCAUG  
>P5837  
CGACCCCUGGCCUCCCCAGGUCCACCUCAGGUCUGCC  
>P5838  
CGGGGAGGACGAAGACGAGGAGGAGGACGAGGAGGAGG  
>P5839  
GGAAAGGCAGCCCAAGGAUAGCAGGAGAUGUUGUUGGGU  
>P5840  
CCGUCUCUCGACCUCCAAGCACCCGAGGUAUCCCUUUCUCC  
>P5841  
AAAACUGUUGUUGGCUAUCACUGUCUCCUUUAGACACUU  
>P5842  
CCGUCUCCUCUGGCUCCCCAGCCGACUUCAGCCCGGCUGC  
>P5843  
CAGCUUCAGCACCUUCAUGGACGGCUACACAGGAGAGUUUG  
>P5844  
GGCUGCCAGACUGGAAGGUGAUGGAGGACUGCCGAGACAUG

>P5845  
ACGCCGGGAUAUGGAUCGAUAUGGUGGCCGGGAUCGCUAUG  
>P5846  
ACCUGCAAAGAUGACCGGAGAGCUGGACGGCUUGGGCCGGU  
>P5847  
AAAGCAGGUACUCACCAAGGAGGGAGUGGAGACAAACUUGG  
>P5848  
GGAACGGUGUGCGACAUGGGAAGAAAACCAAGCGGACAGC  
>P5849  
AACCCGGACUAGGGAGGAAGAGGCGAGGGAAAGGUCUAUG  
>P5850  
UGGAGUCAGCUAGACUACCAAUGGGAUGAUGGAUGGAGCA  
>P5851  
AACCAGCGAGGCUCCCAAGAAGGAUGAGGAGAAAGGGAAAG  
>P5852  
UUGCGGAGACUCACCCCUUCAGCGUCGCUGCCCCAGCUCA  
>P5853  
CUAGGGUGGCGGGAGCAGGCAGCGGCGGCACCGGAGAGUCG  
>P5854  
GGCCCUUUCACCUCGUCCACCCGGUCCACUUGGGCCACC  
>P5855  
GCCGCGAGCAGAUGGCGCUA AAAAGACCCAAGAGCCCGCC  
>P5856  
GUGGCGGCUGUGGCAGCGGGAGCAGCUGCGCCGCCAGCGUG  
>P5857  
AGACUCACCGGCCGCACGCCAUGAGGGCCUGUGGGUGCUG  
>P5858  
CCUUCUCUACUUUACCCAGAUCCUCUUCUACUGUACCAUC  
>P5859  
GCAGCAGUCAGCCAUUUACCACGCGGGGCUUGCGCCAACUC  
>P5860  
GCGCCGCCGCAAACCCCGAGCCCGAAGCUGUUGCAGCCG  
>P5861  
AGACCCCUACUCAUACCCAACUGGAAACCACACAUACCAG  
>P5862  
GCCGGCGGCGGCCAGCGAGGAGGCUGCAUUCCCGCCCGUGG  
>P5863  
AGGGACGUCGCGCGGCACAGAGAGGACCAGCCUGGACGCC  
>P5864  
CCUCACUGCGGCUCGCCAGCACCGCCUCCAGCCGGCGGCC  
>P5865  
UGGCGGUGGAGUCGCGCGUUACCCAGGAGGAAUUAAGAAG  
>P5866  
CAGCCCCGUUCCUGCAUCAGCCAGCUCCACGCACGCAGC  
>P5867  
AUGCAGAUGGUCAGUAGGACAGAAGGUAACAUGAUGACUC  
>P5868  
CAGCACCGCUGCUACUCGCCAUGGCUAAGGCCGAGGGAGGC

>P5869  
GUUUCAUCCUGCGCCCUGCAAGAAGGAGCCGGCCUGCCUCU  
>P5870  
GGGCUCGGGCGGGGUAGGCAAUCCGCCUGACCGUGCAGU  
>P5871  
AGAAGAACAGGGCACACAGGAGGUCUGCACGGCCGACAACA  
>P5872  
UUUUCUCCAGUUCUCCUCCACCCUUUUUGCUACCAAUUCU  
>P5873  
GGGACCCUGGAGCCUCCGAAAACACCCAAGCCUGGAGC  
>P5874  
GAGGUGUCUGCAAGGAGAAUACACAGCAGCGAGGGGCUGCA  
>P5875  
AGAAAAUUGCACCUUCUCCAGAUCUCCACCAUACCUGCC  
>P5876  
CGCGGCUCCGUCAGGCCGCCAUUCUAUCCUGUGGCUAAGA  
>P5877  
UUCUCUGCAUCACUAUGAACAAUCGCUAUUCCUUUCCUC  
>P5878  
GUGAAGAAGAUGGGUGGGGAAGAAUUAGCCGGCGUUACCU  
>P5879  
CCUGUUGGUGCUGGUCCAAAAGGCACAGUGGAGGGUGUUGC  
>P5880  
CCUUAGGCUUUGCAAAGGCGAAAACCGGAGUCGGAACUUGG  
>P5881  
CGCCAGUAGCAGCCUUCGCCAGCAGCGCCGCGGCGGAACCG  
>P5882  
AGCUGUGCCAGACGAGGUUGACGGAGACUCGUCAUCACCGU  
>P5883  
GGAAAGAGAACGUGAACGAGAAAAGGAGAAAGAACGGGAGC  
>P5884  
AACGAAGGCAGCAGAGGAGCAGGAAAGUCGGAGAAGCGAGG  
>P5885  
GCCCUACCUGCCUCCUGCUCAGCCGUCCCCUUCGCAGUCCC  
>P5886  
GAUAAGAUGAUGGGUAGAAGAAGAAGAUAGUCGAGAGAAGAU  
>P5887  
UCACCUCGUAGUCGGCAACC AUCCGAAGCUUCCCCAGAAAA  
>P5888  
GGGUAAGCCAAGCGCCGCGCAGUGCUGAGUUC CGCACGCC  
>P5889  
GUCGGCUUCUGACGUUAAAACAGGGGGAGCGGAAGGGAGC  
>P5890  
GAGACACUAAGACCCAAGGGAAGGUCCAUGUGCCUGGGGCC  
>P5891  
UGAGGCAGCAAGCUCGCUAGAGAGGGAGAAGCAGUCGGGCG  
>P5892  
CCGACCUGAGCGCCACAACAACCACAUGGCCAAGGUGCUG



>P5893  
GGUCUCCUCUGUGGCCAUGUAGAACACGUCAUCCGGGGCGU  
>P5894  
AUAGACCUUCAGUUACAGAGAGAGGGAGCAGAGUGGGACCA  
>P5895  
GGGGCCUCCCCGCGAGCGGAGCGGGGACAAGAUGAAGUAC  
>P5896  
CUUGAUCCUCACUCACAUCCACUUACACAGACCCGCUUCUC  
>P5897  
UUACUUGCUGCUCCAACUGCAGUGCGCUCUUGUUCUCGUGC  
>P5898  
GAGAGAGGGAGGGAGGUAAGAGAGAAGAGAGGAGGAGGAGG  
>P5899  
CGCAACCUGCCCUCGGAGCUACAGAAGCGACCAAGGCACGU  
>P5900  
GCCGCCGCCGCCGCGGCUUCAGCACCAGCGCCCGGACAGCG  
>P5901  
GCGCCCGGGAGCGGCGGGAGAGGCGGGGCGGCAGGUGAGGG  
>P5902  
GGAACGGGCAGAGGCCGUUCAGGGAGGGUGGCAGCUGCUC  
>P5903  
GCCAUGC GCCUCCGCCGCCUAGCGCUGUUC CCGGGUGUGGC  
>P5904  
ACCCGCUCCAAGUCCGCCGCACCGCUGUCAUGUUCCGUGG  
>P5905  
CAGGGGGCCCAUAGAGGAGAACUCCCUUUGGUUGUGUCAGG  
>P5906  
CCGGGCCCGCUUACUGGGUGAAAUGGCGGGUGUCUCUUCAG  
>P5907  
UGGCACGUGCCUAUAGUCCCAGCUACUUGGGAGACUAGGGA  
>P5908  
UGGCCAGAGCGCCAGGCAGGAGCAGGGGGCCGCGAGCAGCC  
>P5909  
GCAGGCAAGAAGCCUGUGGUAGGUAAGAAAGGAAAGAAGGC  
>P5910  
CUCAACUCCAGAACCUUCCGACCUCCGCUAGUUCUGCGGG  
>P5911  
GGUUCUCGUUUUCGCUUCUGACCCCUUUCUUCUUCUGGAAA  
>P5912  
CCACCCUUGGGCUCAAGUCCACACACCAACCCCAAGGAAC  
>P5913  
GAUCCGCGUCGCCAUCCAGGAGGCCGAGGACGUGGACGAGU  
>P5914  
GCAGGACCCCGCCCGGCCCCAGGAGCCCACCAUGCCUCCCC  
>P5915  
GCCUCUGCUCUCCUGCUUUCGCAGCCUCUCACCCUGCUCCUGU  
>P5916  
GUGGGGGUGGGCGUGGAGAGAAUUCUUCUGUGGGUCCUCUG

>P5917  
UGGGAUUGGCAGCGGGCGGGGAGAAGGGCCGGGCUCAGAGGA  
>P5918  
CCAUAACAUAAGGCUUCAUUCAGCGCUCCAUAUGUCAUGACA  
>P5919  
CGGGGCGGGCCCGGGCCCGGAGACGCGCCGGCAGCCCCGGC  
>P5920  
CGAGGUGGAGGAGCUCCUGGAGCAGGAGAGGCUUCGGCAAC  
>P5921  
GCCAGGAGGUUGCCACCGCAGUUGGGCCGGCCUUGGAGA  
>P5922  
GGUUGAGCGGGCUUUUUGGAAGUUUGUGGCGGAGGUGAGGC  
>P5923  
GAUGGAGAAGGUGCUACAGCAGCGGCGGGCGCUGGAGGAGC  
>P5924  
GGGGCCCGGGGAGGGGCCCGACGCUCCGGGGCGGAGCCCCGG  
>P5925  
UUUCUGCAGACAUAUAUGGACUCCUCCGCCAGCACCUCAC  
>P5926  
ACCGCCGACAGAAUGCAGAACUGCGAGAGGAAGAGCAGCA  
>P5927  
GGGAGCGGCGGCUAUGUACACCAUCACCAAGGGGCCAGC  
>P5928  
CUAUGAGGCGGGACGUGCGCAUCCUGUACUGGGCGAGGGU  
>P5929  
AGCCCCGCGGAGCGUAGCGGACAGGUGGAGGACCGAGCGGG  
>P5930  
GUGUCUCAGGUCCUUGGAAAGCCUGUGUCCACGGGAGGCA  
>P5931  
AGCAGGAAAGCCAGUUACCUAAAAGAGCCUAAUCCCCAAU  
>P5932  
CCUGAUAGGGAGACUUGGUGAAUACAGUCUCCUCCAGAGG  
>P5933  
GCGGCUUGCUGAUUGGGGGCACAGGCCCGGCGGGGGUGGG  
>P5934  
UCCCCGUGCGCCGGAGAUCACGGUCCCCGGGCCGCCGCCG  
>P5935  
CUUCUAACUUGAUUCUGAGAACGAUCCUAAUUGCAUUGCA  
>P5936  
CGGGGAAACAGACGAUGGGCACUAGGACACUGCGCAUGUAC  
>P5937  
GCAGCCCCCUAAGCCGGAUACCCUCCCCACCCCGAGGAG  
>P5938  
UUACAAUGUCAGGAUACCGCAGCUGUUGAACAUUGUCACU  
>P5939  
ACCCCCGCCACACUCCCCAUGCCGCCACCAGCAGCUCUG  
>P5940  
GAACAUGGACGAGCUCAAGCACAGGUCAUGAUCAACCAGU

>P5941  
UUUGUGUGUGUGUACGUGUGAGCGCAUCUGCGUGCCUGUGC  
>P5942  
UUCUUCAAGUCCUUUGGUGGAUUAACAAUCUGGAGGAUAAA  
>P5943  
CCCAGCAGAGGCCACUGCAGAGCCAUGCAGAGAUGGCUGGG  
>P5944  
ACGGGCCUUGUCAGGAAGCGAUGGCUCAAAUGGUACUGAC  
>P5945  
UGUUGCCUUUUUUUCCAACACCACCUCUAAGUCCGUGUCU  
>P5946  
UCCACCCUCAGCGGAUGAUAUCUCAAGACACCUCUGAGU  
>P5947  
GAGUGGAGAGGCCCGGGGCCAGGAAAGCAGAGACAGACAAA  
>P5948  
UGGGAACUGCUGAGGGUUGUAGGGGAUGUAGGAAGAAUAGG  
>P5949  
GAUUGACAAUGCCCCGGAGGAGCGAGCUCGGGGUAUCACCA  
>P5950  
CGUCCUCGCUGCUUCCACUCAACCUCUCCCACCCUUAAGC  
>P5951  
GGCCAUGGCGGAGAUACAGCGACCUGGACCGGCAGAU CGAGC  
>P5952  
GGUGGAAGGGGAGUGAGCAGACACUCAGGAGGUGUCUUGAG  
>P5953  
AUUCGGUCAUUACCUCACGAAACUUCGGGACAGUGUGGAG  
>P5954  
GUUCUGUGCCUUGGGAAGAGAUGAAUGGGAAGCGGCCAGCG  
>P5955  
CAAUUAUCCAGUGGGCGAAAGGUGGAUCAUUUGGGUGCAU  
>P5956  
CCCGCCGCGCCGCGCCGCCACCCUCUGCGCCCCGCGCCGC  
>P5957  
GGGGCCUGGUCGCAUGGCGACCGGCUGUACGCUACCACAG  
>P5958  
CCCAUGUUCUAUAGCGUGAAACAGGCGGGCAAGUCACGGCA  
>P5959  
UGGGAGCACUGGCACCCCACAGUGGGGGAGGGGAGGGGAGG  
>P5960  
CCAACGGCAAAGCUCUAGGGAGAGACCAUAGAGCCCCGGCG  
>P5961  
GGGGUUGGUCGUCCUCUUCGACGGAGCGCGCAGCUUCGGGA  
>P5962  
GGGAAGCGGGAAUCCUGCACAAACUGAGCUGGGGGAGAGGCC  
>P5963  
CCCACCUGCCCUCGGCUCCAUUGGUGAUGCAGUCGUCUGUGC  
>P5964  
GAACACGGACGGACCGGAGAACGGGUGCUGGAAGUAGUUGG

>P5965  
GUCGCGGCUUGGGACCCGGCAGAUGGGCAAGAAGGGCAAG  
>P5966  
GCCGCACCCCCAGCCCCGCCAGGCCCGCACUCCGCGCCCCG  
>P5967  
GAAGCUCACCACUGCUCAGGAGGUGCUGGCCCGGGCCCGCA  
>P5968  
CCCUUUCUGUGUGGGAAGCAGACCACGUUUGAAGGAGGGA  
>P5969  
AGCGAGGCGGCCGGACCCGCAGCCCCGAUGCUGCUGACGCU  
>P5970  
GCCAGGCUGCAGCAACGCCAGGAAGCUGGAGUGGCCACUG  
>P5971  
CCGACCAUGGCUCCACCGCCAGACUCCCCGCGGACCCCG  
>P5972  
GGAAGAGGAUGAAGAGGAAUAUUUUGAAGAGGAAGAAGAGG  
>P5973  
GCACAGGGCCUGCUGAGGGCAUGGGGCCUGCUGAAGGCAUG  
>P5974  
GGUCCUAGGCAGCUCCCCGUCACGAGCUCCCGCUGCCGCC  
>P5975  
GUACGGGGAUAAAACGCGGAAGGGGACGGAGCCUAACACA  
>P5976  
CCGAGAGCAGCCCCAGUAGCAGCGCAUGGCCGGGUGGAAC  
>P5977  
AGCGCGGAGGCCGGCGACGGAGGAGCCAGCACACGGGGCA  
>P5978  
UCGGCCCGCAACCUCCCCAGCCGUCGGUGCCACUCCAG  
>P5979  
CCUCUCCAGCUACUCACCCACUCCCCUAGCUACUCGCC  
>P5980  
GAAGCUGAGGUGACGAAGGCAGCGGCGGCGGCGCCGUUUC  
>P5981  
CGGGCGGGGCCGGGCCACGACCGGGGCCGCGACCGCCACA  
>P5982  
CAACUAAGGGCCCCCACUGUAAGCCCCGCACCCCCACCCC  
>P5983  
GACCAUCAGGCGACAGAUUGAAGGGCAGAGGGAGGCAGCAC  
>P5984  
UCUCUCUAAGGAUGGCCAGAGGAGAACUCCUACCCCUGG  
>P5985  
UUUCGUUGUUGAAUUUUCUCAGCAAUUUCUUGGGCAAUUUG  
>P5986  
GGGACAGGAGGACGAGGGCAACGGGGCCAGUACAGGGGUA  
>P5987  
GGCAAAGAAGGCGAGGAAGCACCGCUGAGGCAGAGGAGAA  
>P5988  
GGGCCUUGGCCAGCCUGGCCAGCCGCGAGCAGCCCCACG

>P5989  
UUCGUUUGUUCAACGAUUAGAGUCCUAUGUGAUCUGAGUUC  
>P5990  
GAUGGCGCCGAAAGCGAAGAAGGAAGGUGUGUGUUGGUGAU  
>P5991  
GGUGGCGGCGGGAGCCGGAGAGCACAGCCCAGGUGGUGGUG  
>P5992  
UGGAGGAGAUCGAGGUGGCUAUGGAGGAGACCGAGGUGGAG  
>P5993  
GAGCAGGCGGCGAGCGAGGGAGGGGGCGGCAGCUGCCAGCC  
>P5994  
UCCGGUAGGAGCUGUAAUCAAUUGUGCUGACAACACAGGUG  
>P5995  
UCGCUGCUGCGGCCGCAGCC AUGAGGUGAGGGCGAGCUGGU  
>P5996  
GUUAGACCCCAAUGAGACCAAUGAAAUCGCCAAUGCCAACU  
>P5997  
CCUCUGGAACCAAGCCAUCUACACUCUACCCCAUCUUUCCC  
>P5998  
GGAUGUGGAGAUGAAAGAGGAGGCAGCGACGGGUGGCGGGU  
>P5999  
CCUGCACUGAGGAGGUGGAAAGAAGAGGAUUGCUCGAGGAG  
>P6000  
GCGGCGGCUACGGGGGCGGCAGCUCCGGCGGCAGCAGC  
>P6001  
GGUACAGGAGCAGGUUGUGCAGCGUGGUGAUGGCAUAGAAC  
>P6002  
UGGAGGUCAGGGCCAUCUUCACGGGGUACUACGGGAAAGGC  
>P6003  
CAGCCCCUGGGGGGGUGCCAUCCAGCCUGGCUGAGUCCCA  
>P6004  
CGGACGGCACAGAGGGAGGGAGCGAGCGAGCAGUGAGUAAG  
>P6005  
GCGCGUAGCCGGGACCAUGGAGGGGCAGAGCGGCCGCUGCA  
>P6006  
GGCUGGGCAAACGCGAGGGGAUAGGCAGGGGGAGGAGGCC  
>P6007  
UGAGGGACGUGGGUGGAGGGAGACGUGGGGAGCUCAGUCGG  
>P6008  
GAAGCUGGUGCGGCGCUACAAGCUGGCGAUUGCCACGGCGC  
>P6009  
CAUCUUUUUCCAGGUGAUUUACUGUUCUUUUGGUGGAACAU  
>P6010  
CUAGGUGGGUUGGGCCUGAGACCAGGGCACGGGUGUGGUG  
>P6011  
UUCUCCCAUUUUUCUUCUUCACUUCCACUCCAUAUAUCA  
>P6012  
CCGCUCGGCCGUCGCCCAACGCCGCCGCCACCGCCGCC

>P6013  
CGGCUUUAGUUC CAGUUGCUAGGGAUCUGUGGAGGAUAAUG  
>P6014  
GCCCCGCCACCUUCAAAUUAUAUGAUCGUUGUUCUCAGUC  
>P6015  
CCGCGUCCUCUCCCCUCCCAACCCCUCCUCACUUCACGUC  
>P6016  
GCCUCGAUUC CAGCCUCGCCAUCAGACUCGGGCUCUGAAUC  
>P6017  
ACCUACGAACCCUACCUACUAGCCCUACCUACUAACCCUAC  
>P6018  
CUUCACCCACACCGUCAUGUACUACGGCCACUACAGUAACG  
>P6019  
CGUUCUUGUUCUUGUUCUUGACUAUCUUCAUCUUGCCCCCA  
>P6020  
AGGAGCUGAGGAAGAGGUCGAGAAGAGCUUGGCGGAGCGC  
>P6021  
CAGGGCGGCCACGGCCAGGCACAGCAGAGCGCGGCAGCA  
>P6022  
CACUGGGUUCGCCACCGGGGAGGGACGGGGAGGCCACAUG  
>P6023  
CGGGUGGGUGGGACAUGCCUACACCUACAUCUAGCAGCCU  
>P6024  
CUGCGGGAGCAGGCACAGGGAGUGUGGAGCCUGGCGGGCGG  
>P6025  
GGCCCGCCUGGAUGUGCACGAUCUCCUCAUGGCGGGCGCG  
>P6026  
CGGGGCAGGCGGCGGCGGAGCGGUGCGGCGGGAGGC  
>P6027  
GCGUCGUUGGCGGCAGCGGGAGUGGGUGCGGCGGCAGCGGC  
>P6028  
UGUGCCGAUGCCGAGAAACAACUUGCCAAGUAUGUGUGGAU  
>P6029  
AGCUGCAGGACGCGAGCUGAACACGAACAGUCCUGCAGGCA  
>P6030  
AGCUCCGGGGCCCGGGCCCAACGGCGGGCGGCGGGCCCGG  
>P6031  
GGCCACGUGCCCACGCUGCAGGUCCUGCGGCCGGGGCUGG  
>P6032  
GGAAGCCCUGGGGAGGGGGAAGCCUCCAGGAGGGGUGGAC  
>P6033  
GCUAGCGUCGGUAGGGGUGGAACCCUUGCACGUUGUGGUUC  
>P6034  
GGACGAGGUGCUGUCCUGGAGGAGAAAGACCUGAGGGACC  
>P6035  
CGCCAGAGAGAAGGAAGGGUAUAACCCAGCGCCACCAUCC  
>P6036  
GUGGUUGUCAGCAAGACUGGAUAUGUGUGAGGUGUCUGUGU

>P6037  
GCGCCUUUGUCCCCGGCGCCGAUCGGCAGCUCCCCGGGGCCGC  
>P6038  
GCAGGGCCCCUGCCUCCCCGACCCCCGACCCACUGCAAUUC  
>P6039  
CUGGAGGGCUGGGUGGGGCCAGAGCGGCGCUUCGGGGGCC  
>P6040  
CACCAUCACCACCUUCGAGCACGCGCACAACAUGCGGGUGA  
>P6041  
GUGGAUGGUGAUCAUCUGCAACAAGGCGUCUCCGGCAGGCA  
>P6042  
AAGAGGAGACAGCAAACUGAUAGAGAAACUGGACAUCAAA  
>P6043  
UCGACUUCUCCUCGGAGGUGACUGCUGCCUCCGAGUCACC  
>P6044  
GGAGAGGCGGGAGAAGCGGGAGAAGGAUGAGAAGGAGAAGG  
>P6045  
GGCCGAGAGAAGCCGUGCCAGGGCCCGAGUCGCCCGACCC  
>P6046  
CCUCUCUCUCUAGUUUUGGGAGGUUAUCAGUGACGAACAUG  
>P6047  
CCCGCAUGGCGGUGGCGCUGAGGGUGGACGCGGCGGCGGUG  
>P6048  
CGGGGAGAGGCCGAACGCGCAGCCGGCGCGGGUCCCUGAGA  
>P6049  
UGGAAUUCAUGGACGACACGAGCCGAUCCAUCAUCCGCAAU  
>P6050  
GCAGGCCCAGCAGGCCCAGAAUGUGCAGCGCAAGCAGGAGC  
>P6051  
UCCUGUUCAUCAUCGUCCUCACCCAACUCCAGGCUCGCCGU  
>P6052  
GUGGGCCCUGCCCCAGCCCCAUCCCAGUUACUGGCCCAGC  
>P6053  
CAGCGAGCAGGCAGAGUCCGAUAACAUGGAUGUGCCCCAG  
>P6054  
UCUGGAUUUGAGUCCCACUCACUCCUCCUAACCCCCUCA  
>P6055  
GGAGGACAAGGAGGAAGAUGAGGAGGAAGAUGUCCCCGGCC  
>P6056  
CCGGGGAGGCCCCACACUGAGCCCCCCCCGCGACGCGCGG  
>P6057  
UGCAGGUCCGGUGUUUGUGGAGCUGCCCGUUGACGUGCUGU  
>P6058  
AUCUGGGGGGAAUGUAUCAUAAGCGGGGAGGGGGCUUCGCG  
>P6059  
CUGCCGUCACCCCGGACCUCAUCGUCCAGACCCUGUCAUG  
>P6060  
CACGGCCCUGCAGAAGCUGGAGGAGGCAGAAAAAGCUGCAG

>P6061  
AGAUGCAGCUCAAAGAGGCCAAGCACAUUGCAGGAAGAGGCU  
>P6062  
AAAGGGACCCCUGAAGCUGAAAGGCGUCGCAGAGCUGGGAG  
>P6063  
UGGGCGCAUGGGGGGUGGGAGGCGGAUGUCUUUAGGGUCC  
>P6064  
AGUGGCCGGGGCAUCCCCGAAGGCCCCCUUCUCCUCUGGGG  
>P6065  
UGCCCACCCCAAUGCCACACGCGCCCCUCUACCGCAUG  
>P6066  
CUUCCUCACAGGACUCCAAGAUCAAGUCCCGCUGCCCCAC  
>P6067  
UGGGGACGUCCAGCAGCAGCAGCAGCGGUGGCAGGAACAGC  
>P6068  
GGUACUGGAUGGGGUUGAGGAUGCAGAGGGUGAGGAGGAAG  
>P6069  
GCCGGCGCGAACCCGCACGACCGCCGCCACCAACCAGCUC  
>P6070  
GGAAAGAACCACCUUAUUUGACCUUCUUCUUGGGACGCAGG  
>P6071  
CUCUCUGGUCAUCGCCUGGGAGGAAGAUGCCACCGCCGAG  
>P6072  
GGUCCACUAAGACGGGGAAGAGCUCAAGGGGGGGCGACCGG  
>P6073  
CUGCCGCAUCUCACACGUGC AUGUCCCCGCCGCCGCCGCC  
>P6074  
AAAUCCUCGAGGGGCAGUGAAGGUACCACCUCUGCCACCAC  
>P6075  
GCAGCUGUUCUUCCCCACAUGGACAGAUGGACACACAGAGCCU  
>P6076  
CCCGGGGCGUGGCCCCGCCCAAGCAUCGCUGCCGUCGUCGC  
>P6077  
GACAUGUCCUGGACAAGGCAGAGGCGGCACUGGUGGCCAA  
>P6078  
GUCGGAGUUGC GGGUGCGGAGGGGGUACGGGCCGGGCGCU  
>P6079  
GGAAGCCCGAGCGCUCCAGGACGCGCGGCGGCCGCGCCGG  
>P6080  
GUCCUUCUCCACGGCCUUGUAUGGCGAGAGCGACCUGUGAG  
>P6081  
CGGGCGCCGGGAGGUGUAGAAGACAGAUUCGAAACUGGG  
>P6082  
CAGGGCCGCCACCAGGCUCACAUCCAUCAGCUCCGGGGGU  
>P6083  
GGCGGCGGCGGUGGAGGAGGAGGAAGAGGUGGUAAGAUUGG  
>P6084  
UUGGUCACUAUGGAGGAGAUAGGCAUCUUGGUGGAGAAGGC



>P6085  
GCACCUACAAUAAGAACAGCAACAUCCCUGGCUCAAGCGCC  
>P6086  
UGGGAGCUACGGCGGUUACAACCCGGCCCCUAUACCCAC  
>P6087  
UGGCCCCACCCCUCCACUAUCUCCUGCCGCCCCACUCU  
>P6088  
GCUCGGGCAGGGCGCGGACUAGCUCGUUCGCGGAGCCCGGC  
>P6089  
GAGCGGCCACAGAGCUGGCAAGGCUGGGCCGGGGCUGGGC  
>P6090  
CAACUGGCAUGGCCCGAGCCAUGGCCGCCGCGUGGCCGCUG  
>P6091  
UGAGGCCAAAGCCACACUGAACUUGUUCUUGCGGUGAUUC  
>P6092  
UCCCCGCCCCUUGGGCCUAGCCUUUCUGCUCACUCCCG  
>P6093  
GGAUUCUCACGAGUCGCAGAGUUGGAGAAAAGUUCGGUCG  
>P6094  
CAUCCCAGCCUCAGUGUCCAGACCCAGGCAGCCCGGGUC  
>P6095  
CGACCAUUCUUUCCUCGACCUCGGGAGCCCCUGCCACG  
>P6096  
GGGAUGCCGAGGUCUGUCCCACGCCCGCCCGCCUGGCCACC  
>P6097  
GAAAGGAGAGAGGGAGGAGGAGGAGGAGGAUGCGGGAUGGAG  
>P6098  
CCCACCCACAGAGGCCUGAGGAGACCUCUGCCAGGGAU  
>P6099  
GGAGCAGCAGCAGCAGCGGCACAGAAGGAGGGUUCCUCGG  
>P6100  
AGGCUAGGUGACCUUGGGACACUACGCUAAGGGAGGGAGGC  
>P6101  
GAAGCGGAUCGCAUGGAGUGAUGGUCCCACCGCAGCGGUGA  
>P6102  
AACAGUGGUGCGCGGAGAGGAGAGGUGAGUGUGAUGGAGAC  
>P6103  
GGCCUCUCGGGUCCGAGGAACGGGCCGAGGUCCCAGGGCGG  
>P6104  
GGUAGCCCGGGCCGCUUGGAGUCGCCCGGACCUGAGAGGC  
>P6105  
UCACCUUGAGCCAGCGCAGCAGGGGGCCUGCAAAGACAGA  
>P6106  
UUUUUCAGAUUCCAUUCUCAAUAACGUGAAGCUGCAGUGU  
>P6107  
GGGACUGGUCCAGGAGGGGAGCCGUGCCGGCAGGGGCAGG  
>P6108  
AGAGAAUGAGGAAGAUGAGGAUGACACCGAGGAGGCUGAAG

>P6109  
GCCGGCGGGGCGCAGAGCGGAGCCGCCUCGGAGCCUGAGCC  
>P6110  
UCGCCGCCGCUCCGCGCCGCAGGGCCGCCCCCGGCCCA  
>P6111  
CAUGGCGGUGCAGCCGAAGGAGACGCUGCAGUUGGAGAGCG  
>P6112  
GACUUGGAAUGACUCUACUUAAUUGUGUGGUUAUUAGUCAU  
>P6113  
AAGAAGGCUCGCAGGCUGAAAGUCACCUCUGAGGCGCCUU  
>P6114  
GCCAGGGAAGAGCCGCUGCAGCCGCACAACCUACAGCCAC  
>P6115  
AAAGUCUUCUAAUAAAAGGUUCAUAUUACCACCGUCUUGU  
>P6116  
UGC GCGCUUCGGCUCCGGCGACACACAGCCGCCACCGCCGC  
>P6117  
GCCUCCGAACCUGACUUGCUGAGGCUGUCUUUUUGGGUCUU  
>P6118  
GGGAUGCAGACGGAGGUUGGAUGUGGAUGGAGGCUGGCAA  
>P6119  
CCUCCAGGCAGAAGCCCAGCACUCGCGGGCCCGGCGCGGCC  
>P6120  
UGUAGACCCCGCGAGAAGGAAGGUCGAGCCAGGUACGCGUG  
>P6121  
AUCAACGAAGUGGUAACCCGAGAAUACACCAUCAACAUUCA  
>P6122  
CAGCGGCUGGAGCCACGGGCACACGGCCCGGGUCGGCGGCA  
>P6123  
GAACGAAUGUCUGC UAAUGAACUAAACAAACAGGUCUCUUA  
>P6124  
GCCUGGGCCCGAAGGGAGCGAUGCUGUGGUUCCAGGGCGCC  
>P6125  
GAGACUGGGAGGGAGGGAGAAGCCCCUUGGCCUGCCUAC  
>P6126  
GGGGCGGAGGCGCAGGCAGAGCGAGCGGGAGGUCGCCG  
>P6127  
UGAAAGCCUCUCAAAUGGUGAAUUCUGCAUCACCAGCCCU  
>P6128  
UGACGAGGACGAGGAUGAGGAUGAAGAUGAAAUUGAACCCAG  
>P6129  
AUUUUAGGCAGGUAAAAAUCAGGUGACCCCAAGAAAUGG  
>P6130  
GGUAGACGAAGAAGAGGAAGAGGUGGGGAGGAAGAGGAGG  
>P6131  
CGUUUAGA UUCUGAGACGGGAGUGGAGGGUGAAUAGGUCA  
>P6132  
CUCCUGCUUCCCCAUCCCGAGUUCUCCUGCUCCCCACCUC

>P6133  
GGGUACGCUGCGCGCCAUGGAGGGCGAGGACGUGGAAGACG  
>P6134  
ACAACGAGCGACAGAAAGACAGAGGCAACAGGGAGCGGGAC  
>P6135  
CUCCCGGCCAGCCAGCCCAGAGCCCGAGCUGCUGCCAGAGG  
>P6136  
CUUCAGGGGCUCUGUGGAGAAGGCCUCGUCGUGGCGGUGGA  
>P6137  
UCUUAGCACGAAUGCUCUAUGACCUUGGUUUAGUGUAAACA  
>P6138  
GCGCCCCUGGUGUCCCUCGCAGUGGACUGACGCCGCAGGGG  
>P6139  
CGAGAAGAUGGGCUGGGCCCAGGUGGUGAAGAAUCUAGCCG  
>P6140  
CACCUCAUCCUGUAAUCAAU AUGCUGCAGCAUCUUGCUGCU  
>P6141  
UCUUGCGGCCGCGCGCUGGCAGCACCAGAGGGGCCCGGGC  
>P6142  
ACACGCGGCGCUCUCCUGGCGAGCUGGCACCCUGGCGCUCC  
>P6143  
CAGCUUCGCGCUGGGACUCGAGUCGUUCCGCUCCUCACGU  
>P6144  
GCAGCGGCGGCAACUGAGGCAGGCUGAGGAGGAGGACGGC  
>P6145  
UGUCUGAGGAAGGGAGAGGGAGGGCCUGGGGUGGGUCCCCC  
>P6146  
UUGGCCUCACUUCUCUCCUCAUCCACACCAGCAGCCAAGUU  
>P6147  
GCUGAUCACAGAACAGGCCGAUAUCGCAUUGACCCGGGGAG  
>P6148  
AUACUGGCUAGAGAAUGUUCACAUGC UUAACAAGCUGAGGA  
>P6149  
CUCGGUCCACUGUAAUUUGGACAGGCAGGAGCGCCUACUUC  
>P6150  
GCAGGAUAAACAGCAGCUAGAGGAGCUGGCACGGCAGGCCG  
>P6151  
GGAAAUGGACAGCUGAACCAAGGUCACGCAGUGGGCCAUCU  
>P6152  
CUCUUUCUGUCCACCUUCUUAACAUAUACUCGAAUCAGCUG  
>P6153  
AUUCCGGUGGAUAUCUUUAUCUACAAAGGUUUGAUGAUG  
>P6154  
AUUCAGAUGUGCCGGAGCAGAGGGAUAGCAAGUGCAAGGUC  
>P6155  
CCCGAGGGCGAGAGCGCCAGAGGAGCGGGAAGAAGGAGCGC  
>P6156  
UCUAAUACUGGUAAUGCUCUAGAGGUGAUGUUUUUGGUAAACA

>P6157  
UCCCCUCCCCCUGCCCCACAGUACAUCACCCCCUCCCC  
>P6158  
UUUACAGGGUGGGGGGUGGGAGGUGGGGAGGGGGGCGAGGG  
>P6159  
UCCUUGCCCAUCAUCGCCUCAGGAGCAGCGACCCCCGCGCC  
>P6160  
UCGGCCGGGCUCGUCGUCCACGACCCCGCACGUGCCGCCG  
>P6161  
GGAGCCGAAGAGGGGCGCCAGGCACCAUUCGCGUUGC  
>P6162  
CUAGCGAGUUAUGGCGACGAAGGCCGUGUGCGUGCUAAGG  
>P6163  
AGGGUUGAUGUAAUGCAGUAUCCCUCCAUGGCUUGAGUUU  
>P6164  
CAGCGAGCCUCGAGGCCACCAGGACCCUCACAGCCGCCAUU  
>P6165  
AGCCAUGGCGGGACGGCGGUACCCGCCGGGCCGUUAAGU  
>P6166  
CAGCGCCCGGCUCGCGCCGCACGCGCCCGCCCGUCCGCCU  
>P6167  
GCCGCCCCCGCCAUGGGCCUAGAGCUGUUUCUUGACCUGGU  
>P6168  
AGAGAACGAGGAGGAAGGAGAGAAAUGGCGUCCACGGGUG  
>P6169  
GGUGGCCGGGCAUGGACCGAGGUGGCUUUGGUGGAGGAAG  
>P6170  
UCUGUGGUCCGGCUGCCCCAGGCUCAGUGAUCGCCCCAU  
>P6171  
AUGUAGCUUCCAUGCCUGGAAGAGGCACAU AUGGUAACAUG  
>P6172  
CGCUAGCCCUCCCGCCGUCAGUCCGCUCCCCGGUCGCUGC  
>P6173  
GACAGUGUGGGGUGCCUGGAACUGCUGAGGAGGUGAAGAG  
>P6174  
ACACCGAUGAUGGAUGAAGCAUGUCCAUGGCUGAGGGGAGG  
>P6175  
UCACCAGGAGUCCCCGGAGACAGCUGCCCCAGUGGAGGAC  
>P6176  
ACGCUCCCAGGAUUACCAAUUUCUUCGGGGGAAGGCCAC  
>P6177  
GUCGCCGCCUCUCUCGUCGGAGACGGGAGCAAACACAGAG  
>P6178  
GGACGGGUCAUCCUAGGGAAGCUCUUCACCUUCCCACGAU  
>P6179  
UCGCCACCACCUCCCUACC AUGGACCCCGCAAAGUGAAC  
>P6180  
GAGGGAGGCACUCUCCGUCCACAGCUCGGGUGCGCGCCCG

>P6181  
UGGGAAGACAGGAACCUUGAAUGCGAGUGUGGAAAAAGUUA  
>P6182  
CCCCUGACGCUGGGCGGGGCAGGGGAUGGUUCUCGGGGAG  
>P6183  
CACAUCCUGCUGAUGCCGUCAAAUAAGUAACCCGUCUUGCA  
>P6184  
CGAUGCGGCUACCCGCGUAGACCGUGCCGAAGCCGCCGCUA  
>P6185  
CAGCCCCGGCCUCGACAGUAUUGAGGCCCCGAGCCCCAG  
>P6186  
AGCACUUCUCCAGCAUGGGCAGGUAGGCAGUCGCUGAAGGU  
>P6187  
GCGGCCGGGAGCGAGAACGGACGGGAGGACGGACGAGCGGC  
>P6188  
CCGCCUCAGACCCCUUGUGAAGCCAAGAUCGUCAAAAAG  
>P6189  
CGGGCUCCCGGUGUCGGCGGAUGGCGGGAGCCCGGGGGCCG  
>P6190  
GCUGGUCCCGGCAGCGGCCAAGGCUACUGGGGCGGGAGCA  
>P6191  
GCCGCUUCCACAGCGAAGGGAGCUGCUCCGGGCACGUCGCG  
>P6192  
GGCGGGCGGAGAGAGAAGGAAGGAGGUGGUUGUGCAGGAUG  
>P6193  
GCAGGACAAGGAAGAUGGGGAGCCAAAGACCAAGCAUCUCA  
>P6194  
CAAGCCAAGGAGCCAAGACGAGAGGGACACACGGACAAACA  
>P6195  
ACCUGGAUGGGUUGCUCAGUAGGCUGGUGAACGGUGAGUUG  
>P6196  
CUGCCGCACCAUGGAGAGCUACCACAAGCCUGACCAGCAGA  
>P6197  
CAACAGUCCUGGCCGAAAAAGAAGCGCACUUGGCCAACCU  
>P6198  
GCCACCGCCCUCCUCCGCCACGAUGCCGGGAUCGACAAG  
>P6199  
CCCCGACUUGCGUAUCGCGCAGCUGCGCUUCCUGCUCAGCC  
>P6200  
UAAUAAUACAUUCUGCCACAACCUAAAGAUACUGAGGUAAC  
>P6201  
GCAACUACAGGUGGCACUGGAGCAGACUGGUUCCUGGACA  
>P6202  
AGUGGCCUUUGAGAUCUCCAGGUUCUCGAUGCUCUCGAUC  
>P6203  
CAUUAUACACCCUAACAAAAUCUCCCCUACAAUAAGUUCU  
>P6204  
CAGGACAGUCCACUCAGACCAGGCUGGAGACGGUUGUGUA

>P6205  
ACCUUCCGGCGGCCGAAGACACUGCGACUCCGGAGACAGCC  
>P6206  
CUGGGCAGGCGACCCGCCGCAGGUCCCCGGGAGGGGCGAAC  
>P6207  
CCCCGGGGGAGGGGUUGGACAGCGGCAGUGACGGCGGGAGU  
>P6208  
CCAGCCACAUCCUCAUCUGGACCAGUUUCUGACCACCCAAU  
>P6209  
GCAGGACAGGGAUCACAGGGACAGUGGGAGGAGAGGGAAGA  
>P6210  
CGGGGGCGCGGCCAGGAGCGAGGCCAGGAGCGCCAGCAGCG  
>P6211  
GGAGAUUGCGAAGAUGGCAGAGAUGCUGGUGGAGCUGGUCC  
>P6212  
UCUCUGUCUGAUAGCUGCGGAGUGAGAAGCGGAUUGGCUGC  
>P6213  
UAGCCGAGGCGCCGGCAUAUAGCAGGACCAGGCCCCACCGC  
>P6214  
ACCGCUGUCAAGGUCAGGAGACCGUCCCCAAACCGCUCCAA  
>P6215  
GGCCCGGAACCCAGCCUGGAGCGCUCUGAGCGGCCGGCUC  
>P6216  
AGACCAGCAGCAGCAGCAGCAGGAGGCACCUUUAGGCCCGG  
>P6217  
UUCGCGGCAGCGGCGGGUGUAGUCUCGGCGGCAGCGGCGGA  
>P6218  
CCUUGUGACACUGGGAUAAAACUUCGACAUUACUGGAAGA  
>P6219  
CCCGACUACAGAAGAGGAGAAACGGAAUCUAAUCAGGAGG  
>P6220  
GGACCCAUGGACAGUCUACACAAACGCCCUUUAACUUCUU  
>P6221  
GGAGGAGGAGGCGGCGGGAGGAGGAUUUCCUGCCGCCCC  
>P6222  
AACGCAUGAACUGCCUGGUGACGAAGGCCAUGGUGUGGCAG  
>P6223  
UCGGAGUCUUUGGAGAAGAGACAUUCAACGGCCGCCGGCUG  
>P6224  
GGAGCUGCUGCGGGGCGGCGACGGCGGGGAACGCGACGAGG  
>P6225  
AGGGAACAAGCGAUUAUGCUACCUUUGCACGGUCAGGAUAC  
>P6226  
GGAGGUGUCCGGGUAGGGCAACGCGGCGACACCCGAGGCCU  
>P6227  
GGGCGACGGGAGGCUGGACGAGCUGGGGCUGGAGGCCGGCG  
>P6228  
GGGAGGGGAGAGGAGGAGGAGGCCGGGCCCGGGCAGGUGCG

>P6229  
GGGCGUGCGGAGUGAGCUCAGGUGUGAGCGCCGGGGAGCG  
>P6230  
UCUCUGUCAGAUUUUAACCAAUCAGUGUGAUGUGAUCUGC  
>P6231  
GACCGGGACAAGGAACGGGAAGAGACCGGGAAAAAGACAA  
>P6232  
GGAAAACACACUAGGCAAAGAACUUGCGUCAAAAUCAGG  
>P6233  
CCAAUUUCAAAUAGGGAAGGAAAAGGGAAAAGAAGGGAAGA  
>P6234  
UAGCCGCCCGAAGAUCUGCGACCCACUCCCUCGGUGCUCUC  
>P6235  
AAGUCCCUAUUUAAGGAACAAGUGAUUAUGCACCUUUGCA  
>P6236  
GCAAAUAGUGGAAGAUUCAUAGGUAGAGGCGACAAACCU  
>P6237  
UGCUAGGAAGCUCCGUAGUCACCGACGAGACCAGAAGUGGC  
>P6238  
AAUUGGGUAAGGAACAAUCAAAUUCAAUUCGGGAAGAAUUA  
>P6239  
UGAACUGGAUUGAAGGUCGAAAAGGAAUAAAUUCUAUUA  
>P6240  
CCGCACACGGGCCUACACGCACACGCCGCCCGGUUCCUC  
>P6241  
CCCCGCGGUCAGUCUGAAAAAAAAGUCCCGCGCAGCCC  
>P6242  
CGCAGGGGCGCGAGCCGGCGAUCAGCCUCCCGGCGACCGU  
>P6243  
CUAGGGAGGAGGAGGCGAGAAGAUGGCGGACGCCCCAGUG  
>P6244  
GAGCGGCGCUGCCUGUGGAGAUCCGCGGAGGCCGACAGGAU  
>P6245  
CCGGACCCGCGGCGGGGACCAGCAGCGGUGAGUGGGGCCGC  
>P6246  
CGGGGACGGGGCGAGAGUGACGAUUCAACCCGGGGGAGC  
>P6247  
UCGCGCGCCAGGGCGCACCACCGGCCCGCCGGCUCGGAUG  
>P6248  
CUCCACGGGGAGGGCCUCUCAUCCACCACCCAGCCCACCU  
>P6249  
UUUUGCCAUGGUCGCCCCCAUCUCAGGUACCGUCUCAGAG  
>P6250  
GGACCCCGGAACACUCCGUACCGGGGCAGUUCAGGCCGG  
>P6251  
UUGGACCCCGAUAGGGGUGCAGCAUUAACUGCAUCUACAAC  
>P6252  
CGGCGGGGGCUGGAGGCGCGACCGCGGCCCGCCCGAGCGGG

>P6253  
AGCCCCGGACCUUCACCACGAAUCCCUCUCCACCUUCCGUG  
>P6254  
AGCGACUAAGGCGGCAGAGGAGCGGCGGCGUGGCGGCGCU  
>P6255  
CGCUCCAGGCCGCCUGAUGAGCCCGCCGCCGCCGCCGCC  
>P6256  
UCCCAUGCUCaucacUGAUGACCUCCCAAAACUGAGACAGA  
>P6257  
UCUAUGGAGAUCUCCCGCAGAGGACAGCACGAACAGUCCC  
>P6258  
AAUUUCUAGAAAAGAGUCUCAUCGUGGAAGGCAAGAGGGAA  
>P6259  
CGGGCCUUCUUCUUCACGGGAGUCUUCUCGGCAGGGGCCGG  
>P6260  
CAGUCACCUUCAUUGGCAAUAGCACAGCCAUCCAGGAGCUC  
>P6261  
CCGACCAAAGGGAAGCAAAAACAAGGGUGCUGCCAAGACCC  
>P6262  
CCACCUGUGCCUCACCACCACACUACACAGCACACCAGCC  
>P6263  
GGGGGCAGGGAGGAGCAGGAGGGGGUUGGGAGCGGGCAG  
>P6264  
CGUCUGUAUACUGCAGCGCAGCCAUGGCAGAACCGCAGCC  
>P6265  
GGAAGAUAAAGAUGAUGAAGAAAACCCAAGAUCGAAGAUG  
>P6266  
AUUUUCUCUCUCAGGAGUUUAGAAAUGGUAUACCAAACAUG  
>P6267  
UUACCAAAAACAUCACCUCUAGCAUUACCAGUAUUAGAGGC  
>P6268  
CAGGGCCAACAGGGGCCUCCAGGAGAGGUGGGACCCCGAGG  
>P6269  
AGUUUAUCCAAGACCCAGGC AUACUUGAAGGAGCCCUUCC  
>P6270  
CCCUGGGUGGUCCACCUGCAAUUCGCGGAGCGGCGCCCCAG  
>P6271  
GGAGGUCCUGGAUCAGCAAGAGGCGUUCGAGGUGCGAGAGG  
>P6272  
GGUCGGGGACGGGUGACGAAAGAAGAGGGUGAGGGAAGGGG  
>P6273  
GCGGCGGCGGGAGCGGCACGCUGGGCUCGGGCUGCUC  
>P6274  
AGCCCGGGCGCCUGGAGUGAGGAGGACCGGGAGCUGGCUC  
>P6275  
AUUGGACAAGUAUAUGAAGA AUUCAGGUAACUAAAAUAAC  
>P6276  
UUGGAACAAAACUACCGAACAGUGCUGCUGAGAGACAUGCG



>P6277  
GGACGCUCCCAUCUCCACAACGUCACAAGAGCAGCGGAUA  
>P6278  
UUCAGAAGUGCCUCCUGCCCACGGCUCUGCUCUCCUCACGG  
>P6279  
CAGCAACAGCAGCAACGGGAACGCGAGCCUGGGGAGCUCCU  
>P6280  
GCGCGGGACGGCUGGUUCUCAGGGGACACGGAGCUGCGGCU  
>P6281  
AACUUUUUACAAUAUUGGCAUUCGAAGCUGCAGCCAUAACU  
>P6282  
GGACAGCGGCCCGGCACCCAGCGCCCCGCCGCCCGCAAGC  
>P6283  
GGCUCAGCCUUGAGUAAGUCAGCUUCACAUUCUCUCUGUUU  
>P6284  
AAGGCAAGAAGAUUUUUUAUUUGAAGUGUUCCAGUGCCAC  
>P6285  
CAGAAGCGCUACACGGCGGCAGGGGCGGGCAGGGGGCAC  
>P6286  
GCUGCUGCCUCCUGCCCACUUGAAACCCUCCGGUACCUAA  
>P6287  
GGCGUUGGGGAGGUGGCGGAGGUGGAGGUGGUGGCGACA  
>P6288  
GGAGGAGGUUGGGGUAGCGGAGCAGCUUCCGGGGAACCCC  
>P6289  
UCCUCCAACUCCUCCUGGGGAACCCAAGCCUGCAGCUCAU  
>P6290  
CCGGAACGGGCCAGCGCUGCAGAGGCCUACGUGCGGGUGG  
>P6291  
GGCGCGGGCCGGGGGCCGCCACGGCGAGGGGCCGGGCCAGG  
>P6292  
GCCUUCCACUGUCCUUUCCAGCUUUGCCUCCAGCCUAAAU  
>P6293  
CUAGAAGAUGGCGGACGGCGACAGCGGCAGCGAGCGGGCG  
>P6294  
AACCAGAAUCUCUCCAAAGAUAUCCUCAAACAGAAUUUCA  
>P6295  
CCAACCACAGCCCCUGCACAGCUUCACACCCACCCUCCAG  
>P6296  
GGAGCCAUGGCCGGGGUGAAGCUGGCAGCAGAGGCCUGGG  
>P6297  
CCGUGCGCGUGCGCGAGAAGCGCGCGCACCCGCCCGCC  
>P6298  
UAAAUUUUGUGAAGAAAACAACAAAACAACUGGGAAGAA  
>P6299  
GGGAGGUGUUGGGCGCGGACAGUCGAGAUGUCAGAGAAAA  
>P6300  
UGGGCGAGAAAGGGGAGCUCACUCUGGGGCUAGGCCGGCC

>P6301  
CAAGAGGCCCGGAGACCCGAAACUACUCGAGGACUCAACCG  
>P6302  
GGAAGUGGCGGAGCAUGUCAAGCACAGACUGGAACCACAGA  
>P6303  
CUAUGUGCCCCAGCUCUCAAAACGACACCUUGGCGGGGAGGC  
>P6304  
UUCCUAGGAUCACCAUUAACAAAGGACACCAAGGUACCCAAG  
>P6305  
ACUCCCUUUCACCAACACCGAACACCCACAUUGACACCUCCA  
>P6306  
AAGACGUUGUUGGGACCUGGAGUCGGGCCAGAGUCCGGCCU  
>P6307  
GGAGGGCGAGGAGGGCGCGAAGGACUGCAGCAGCUCCGCGG  
>P6308  
CCAUCAGCUCCUUGUGCUGGAAGGUGGACCAAGACCCCGCG  
>P6309  
AAAGCCUGUCAAAACAAGUCAAAAGGCUGGUGCCCCAGAAG  
>P6310  
CCUGGGGGAGAUCAUGGGGCAACCAGCUCAUGAGUCUGUCUA  
>P6311  
CCUGCCUUGCAGGCUGGAAGAGCAGACCCGGAGGCUGCAGA  
>P6312  
GCGCGCCGCGGGAGUCGGUGAAGGACGCGGUGAGGUGCCGG  
>P6313  
GGGGUGCCCCGGGCUGCAGAAAGCCUCGGCCGGGGGAGGAG  
>P6314  
GACCGGUGUGAGCGCUCAGCAUCUUCAGGACCCUGAUCGGG  
>P6315  
CGCCUCAGCACCACCCGGCAAUCUCUACAUGACUGAAAGU  
>P6316  
CACGCGCCCCUCAUCCAAAGAAAGACUCAGUCCUGCGCCC  
>P6317  
UUUCCAGCAGGAGCUUCACCAUGUUUGUGUGGCCGAUGCGA  
>P6318  
GGCCGUGGCGCCUCCGGGCCAGACGCGCUGCAGCCUCCAGC  
>P6319  
CGCCGCCCUACUCUCCCGCCAGCUUUCUACCCUCUAGCCU  
>P6320  
AGAUGCCGCAGACCCGCCUCAUCCACCUACGACGGCCCCC  
>P6321  
CGGCGGGCUGGCUGACCCCGAGGGACCCCAGCGCAGCGGG  
>P6322  
GUGCAGAGUGUCGAUAUCGCAAGCUUUAACAAGAUCUGAAG  
>P6323  
GGAGAAGCUGCUGUCGGCCAGCGCGCCGUCACCGGCUACA  
>P6324  
UGGCGUCCGUGAGGGCUGUGACGGAGGCGGGGCAGGUUCA

>P6325  
GUGUAGUCGGUCUGUAGGAAAGACCUUCUUUCCUCAGGGU  
>P6326  
ACCGGCUCUUGAGCGAGGGCAGCUCCCUGUCACCUUUUCAC  
>P6327  
UGCCGCCGCCGCGGGCCGGGAGCGGGUCGGAGCAGCAGGCG  
>P6328  
GAAUUUGGACUUGAUGAAGAAGAUGAAGAUGAGGAUGAGGA  
>P6329  
AGUCAGCUCCCACAGUCCGCACCCAGAGUCGGCUCCGAAUU  
>P6330  
UCACUCCCACUGCCUCGGCCAGGUCUGGAGGGAGGUCGUCU  
>P6331  
UAAAUGAUGGGGUUCAUGGCAGAGUUGAAUUCAGCAAGGAG  
>P6332  
GAUCUGUUUCUUUUGUAGGCAGAAUCCAGAGACCACAUUUG  
>P6333  
GGACCUAAGACCACAGGACAACGCAAGACACCCCGACAAGG  
>P6334  
GUAUACCUGAGGUGCACCGGAGGUGAAGUCGGUGCCACUUC  
>P6335  
UCCGCAGGCGUCGCGGGACGAGGAGAUCGGAGCCGGGAGAC  
>P6336  
CGGCGGGCGACAGGGGAGGCAGGCAAUGCUGUGGCAGAAGG  
>P6337  
AGAAAUCAAAAGCUUUGCGCGAGGCCACGACGCCUUCGCU  
>P6338  
AGCGAGGGGGAGGGAGAGCGAGCGAGCGCCGGGAGGAGGCG  
>P6339  
GAGAGCUUGGUGCACCGCAGACCUGCAGGGGGAAGGCGGGA  
>P6340  
AGCCGGAGGAGGCCGCGCGGACUCCGGGCUUUCGCGGUCG  
>P6341  
CAGCAGGGCGGACAGCAGGGAGGACAGCAGGGCGGGCAGGG  
>P6342  
CCGCCGCCGCCCAUCAUGAGGAAAUCGUGCACUUGCAG  
>P6343  
CCCUGUGCAGAACCUGCCGCAGCAUCCUAGAGCAGAGCGGG  
>P6344  
CCACCUCUCCUACUGUUCAAGUACAGGGGCCUGGUCCGCA  
>P6345  
GGGAGACUCACCACUAGAAGACGAUGAAGUCGGGUAUUCAC  
>P6346  
CCAAUGCCCCCUACAGCGCAUCCGCUCCACGUCCACUCCC  
>P6347  
CGUCGCCGCUUGCUGUGCCCAGGCCGGAGCAGCAGCCGCC  
>P6348  
AGCACACUCAGGAAGAGGACAGCAGUGGCAGUAACGAGGAU

>P6349  
 GGACCGGUGGAUGGACGAGGAGCCUGUAACGUUAAAAAUGA  
 >P6350  
 UCAUGUCUCCUUUUUGGGUCACAUGCUGUGUCUUUUUGUC  
 >P6351  
 AGCAAAGAGGCAAAAGGGGCAGGGCAGAGGGAAGGGAAGAG  
 >P6352  
 UGUGGCCUUCCTGCCACUUGAACACUGCGACAGAACUGGAU  
 >P6353  
 CCAGUAGCAUCAGCAGCAGCAGCAGCAGCCGCCGCCGCCAC  
 >P6354  
 GGAGUCUAGUCGUCACUGUAGCUGCUGCUGGAACCUCCCC  
 >P6355  
 GAAGGAGAUGGUGUUUGGAACUUGUUGUAAGUAAGAUUUU  
 >P6356  
 GAAGACGGAAAAGGAAAUGGAGAAGAUGGAAAAGAGAAAGG  
 >P6357  
 CCUCCAGGUCUCUGGCCACCACCUGAACCGUGCCCACCUGC  
 >P6358  
 CGCCGCCGGCGCAGAGCAGCAGCGCCACAGCCCGCAGAGC  
 >P6359  
 GGAGCGAGAACCAAGGUCGGAGCUGAAGGGGGCACAGGAGC  
 >P6360  
 GCCUCCUCCUCUGCUCCGCCACCGGCUUCCUCCUCCUGAGC  
 >P6361  
 UCCCCUCUGGGUCCCACCCCAGAAGCCACGCACACCUCUU  
 >P6362  
 GCGCCCCCUGUCUGGCCUCAGCUCGCAAGCAGGCUGCACC  
 >P6363  
 AGCCCCGCCUCUCCCCUCACCCCCGGCCCAGGCCGCCCU  
 >P6364  
 AUCUUCAGUGGCUGCAACGAAAAGAGAGAGUCGGAACGGA  
 >P6365  
 UGGACGCGCCCCGAGCCCCACCGCGGCCCGCUCGCACGU  
 >P6366  
 GAGCGUGGUUGAGACAAACGAGGAAAGCGUCAGACUCGAGA

**II. Negative subset  $\mathbb{S}_{\xi=20}^-(m^1A)$**

>N1  
 UUUUCUCAUAAUAUGCAUAAACUUGGUCCUAACCCAGCCC  
 >N2  
 CGUCAUAUAGCUAUCUUCAGACUUGAAUGCUCACGCAUUG  
 >N3  
 AUUUACUGGAAUUAACAAAACUGAAAAAGAAAUAAGACU  
 >N4  
 UUUGUGACGAAAGCUCAGAGACUGAAUGUUAUUCUUUAAU  
 >N5  
 GCCCAAUGUUACUACUUGGACUUGAGCUAUAUCUGCAGCC

>N6  
GACUUAUCAAUUUUUUAAAAACUUGUAGAAUUUUCUUUGUG  
>N7  
AUUCUACCAGACUUCAAAGAACUAAUGCCAAUAUCCAACC  
>N8  
CUUAUACCAUGGCCUUAGGAAACUUUAAGCAUACAUAGUUUC  
>N9  
AUGUUUUUAUCAAUCAGAGGACUCAGCUAAUUAUGUACCAG  
>N10  
UUAGCGCCUGAGCUUCCAAACUCCUAACACAAUGGCUCAU  
>N11  
AAUAACAUAAGCUCUAUGAACUUUGAUUAUGCUGUUCCA  
>N12  
AUUACUCUGGGCAAAAUCAAAACUGACUCUAAAGCCUGCAUG  
>N13  
AUUGUUGAUUAUGUUUUUAAACUGGCAUCUAGGCAUCUGAG  
>N14  
UGUAUUUCACCAGUCCUGGAAACUGACUUUAGAAAACCAGC  
>N15  
CAUGUGAUUUUCUCUGGAAACUGUCUUUUUUUUUUUCUUG  
>N16  
UCUGCAGUGGUUUGGAUGAGACUGUCCCUCGUGUCUCAGU  
>N17  
AUUACUUCGGGAGCUUGGAAACUGGAGGAAAAACACGCUU  
>N18  
UGAGUUCUGUGGCAGCCAGGACUGCAUAGCAGAACUGUGUC  
>N19  
AUAAAAAAAAAAUCCCAAGAACUAAAUCUUUCUUAUAUCUU  
>N20  
UUAUAGAGGAGCGCAGCGAGACUAAUGAUUUGGUGUAGUA  
>N21  
GUAUAUACAGACUCUAGGAAACUAGAAAGGGACCCAUGUUG  
>N22  
CAGGUGACGAGCCAGUAAAAACUGCUGCCUCCUUUAUAAAG  
>N23  
UGCAGCUUUGGGUCAGCUGGACUGGCCCUUUCACAUGUCUC  
>N24  
CUCUUUAAUAUGAAAUGAGACUUUUCUGUGUGCUGUGCUG  
>N25  
CUCUGGUCUUAUACUUUAGAACUCCCACUAAAAGAAAUGA  
>N26  
UAAUGGUCCAUAGAAUUUGGACUAGAAGGAACGGUGCUAAG  
>N27  
CCCGCAACCCCCACGGAGAACUCCAUACACACCAGAGGAA  
>N28  
AAGAGAGAGAGAGAUGGGGAACUGGGGGAAAUGGCUGCUC  
>N29  
CAUCUUCGAGGCACCAUGGGACUCAAGUUGGGGCCAGCACU

>N30  
GCUGAGCUAGCAAGCAACGGACUGAUUUGAGCAGAUGUGUG  
>N31  
CUUUGGUGUGCCAGCCAUAGACUAUCACCACAGAGAGCACU  
>N32  
AGGGCAUCAGGUCCCCUGGAACUGGAGUUAUGGAUGGUUGU  
>N33  
UGAGGACCCAUGGAAUGGAGACUGACCUAGCAUCCUGUGUU  
>N34  
AUGCCUUUUUCCUGGGGAAGACUGUUUCUCCAGCUCGACCA  
>N35  
AUGGAGCAACAGGAAGCAAAACUGUAACAUGCAUGUAAGAA  
>N36  
CUGGUCAAAGGAACAGCAGGACUGCUCUUUCAGUUAACCC  
>N37  
AAGAGGGAUCCAGAACUUGAACUCUUAGGUUACAUGUAAAA  
>N38  
AGUAAAGGACGCCAUACAAAACUGAAGAGAAACUACAAACA  
>N39  
AUCUGAAGAAUUGUGUUAGAACUUUUUAUGGAAUUAUUUG  
>N40  
ACUCACAUCUUUGUAGAAAGACUAUUCUAUGUGAUGGUGAU  
>N41  
CUUUAGGAUCAA AUGCUUAAACUCAUUGUUCUUGCUAGUUA  
>N42  
UUUAAUCAACCAAUAUGUAAACUUACUUUAGCUGUCUCUAU  
>N43  
GUAGACUUAAGACAUUAUGGACUUUCCCCAUCCCGUGUUG  
>N44  
GUUCUGAACUGUAUGAGGAAACUUGCUGAGGAGCCAGGGUG  
>N45  
AUCAUAGUCUUACAUCUGGGACUGUAUCAGAUACAAUUUG  
>N46  
UCUUAGGAUAAGCUUGGCAAACUUAGGUAAAUGUGAACAAA  
>N47  
ACUAUAUAAGAGUAGAAGAAACUCUUAGAAUGCGUGUGAGC  
>N48  
GCAAACAAUGACCAGCAAAGACUGGUAAGGCAAACGAAUAC  
>N49  
CCUCCCUGAAGAAGAAUAGGACUUUCCAAGAAGUUAAGUG  
>N50  
UGAGGACCGGGGAUGUGGGAACUGAUUUCUGGUGGUUCCAC  
>N51  
UUAUGAGGUUCUGAGGUGGAACUCAGAAUCCCUGUUUACG  
>N52  
UGAUUGCAUAGAUGGAUAAGACUUUGAUUGAAAUACAACUG  
>N53  
AUAAAGAUGACUGAGCUCAGACUCUGCUGUCUUUCCAUCU

>N54  
GACCAUUAUGCUGAUCUGAAACUAAAGUUUGUUUUUGUUUG  
>N55  
CGACGGCCCCGAUGCCCAAGACUCUGAUUAUCAGGCUUACG  
>N56  
GUAUCUGAGAAUACAUGAAACUAAAUCACCAUGGUGAAUG  
>N57  
GUUAUCCAGACUGGCCUUGAACUUGAAAUCCAACAUCAACA  
>N58  
AUUAUAAAAGGACUUAAGAAACUAGACACCAACAAACCAA  
>N59  
UACUACCGUUUCAUUUUUAGACUCCAUUCAAUCAUAGGAAG  
>N60  
GCAACUGACGGAAACAGGAAACUGACGGAAACCCACAGCCA  
>N61  
UCAAAUUUACAAAGGUUGAGACUUUUUUAAAAAUAGAUUUA  
>N62  
UUUUACCCUUUUAAACUGAGAACUAAUUUAAGUAUAUAUUUU  
>N63  
GGGGGUGGAUCUUGACUUGGACUCUGAAGGGUGAUUGGCUG  
>N64  
GAAGUGUGUGAUCAGCAGAGACUUGACACCUACACCUACAC  
>N65  
AGCUAGAAGUACACAAUGAGACUAGACCAUAUGUGUGUGUA  
>N66  
GUCAGUUCAGACAGCCAGGACUGAAACUUGAGCUAUUUUCA  
>N67  
ACAUUUUACUGUUUCCUGAGACUCAAGGAGAUGAUUAUGUC  
>N68  
AUCCUCGACAGAUAAACUGGACUGUCCUCUACAGAAGGAAA  
>N69  
CUUUUAUGUAUUUUUUUGAGAACUGUCCUUUCAAUCCUUUG  
>N70  
AAGGAAGGCUUUUAUACAGGAACUGAAAGUUGAUUGAAUUUC  
>N71  
UUCUACCAUCUGGGUCCCAAACUUGGCAUGAGUGCCUUAAC  
>N72  
UCCAGCACAAACUAUCUGAAACUCCAGUUCAGUGUAUCUG  
>N73  
CUGACAUUGACUGAUUUUGGACUAAUUCGUAGAAUUUGCAG  
>N74  
CUAAUUUUUAAUGGCUAUAGACUUCUUAUCUCUUUCCUGG  
>N75  
CUAAGGCGCUUUCAUCUUGGACUUGUCUCCAGAUAGACAU  
>N76  
GCUUCCAGGAAAUUCAGGAAACUCAAGCAGGAAGGGUAAAU  
>N77  
UUUUUAAAAGAAUUGUAGAAGACUUUGGGAUUUUGAAAAGUU

>N78  
CAAACGGGAGCUGAGAUGAAACUCAGUUGUGGAGUGCUUGC  
>N79  
ACACAUUUUUUUUCACAGAAACUUACUUUAUAUAGACUUGG  
>N80  
UGUGGGGUACAGCAUAGCAGACUGACUGUGAGAUGGGUGUA  
>N81  
ACAGACCUCACGUGCGCGAGACUCUUGGUGCAAUCCAGAGU  
>N82  
CUCUAUAGCACUUUAUAAAAACUUAAGAAACAAACAGAAUA  
>N83  
UCCAGACUCUUGCAAUCAAACUAAAAAUGUAGUGCCUACU  
>N84  
CCUGUCUCGAAAAAAAAAAAAACUUAGUUGGUAAAUGUGAGA  
>N85  
UCUCUCAGGAUUUGUGAGAAACUGGUGCAGGCAGAGAAAGG  
>N86  
UGAAGGGAAGGAAAUGUAGGACUAAGUCUCAUCGCUUCCUA  
>N87  
GCUGUGGCCGUUGAGUAAGGACUGCACAGGCAAGCCGCGUU  
>N88  
AAGGGAGCCUGGAGGUUAAAACUUGGGGAAUUCUUUUUAAU  
>N89  
UGAGACCCUUAUGCCACAGGACUUCUUGACAUCUCGAG  
>N90  
CUCCCUUUCUUCUACCUUGGACUUUCCUCUCCCUCCUCCC  
>N91  
CGCAGACAGAGACUACAAAGACUCAGAUUCUCUUCAGCAG  
>N92  
GAAAAGACUCCAACCAGGAAACUAUUCUCUGCCCGGAGGGG  
>N93  
CAUUCUUUCCUCUGCAAGGGACUGCAGCCAGGCUGGUUUC  
>N94  
GAAAUUCGAUGGCUCCUGAGACUGUCCUCGAGCUCCUACAU  
>N95  
GCCAGGUUCACAUUAACCAAACUCGUAGCGCCAUGAGCACG  
>N96  
UGGAGCUUGCCCCUUUUUGAACUUCACAUGGGUUCAGGGA  
>N97  
CGCAACAUGGAGAGAACUAGACUUUUCCUUAGGAUAGCUUG  
>N98  
AAGUCAGGGGAGUUCAGGAAACUUUCCAGUCAACCUUCAG  
>N99  
UUGUAAAAGAAUCAAUCAAACUUUUGUUUACCCCAAAGGC  
>N100  
AGAUGUGGACAUGAACGAAAACUUGAACAUUGUUUCCUAAG  
>N101  
UUAUUGGGCACUAUAUCUAGACUUGUUUAAGAUUAAGACC



>N102  
CCUCCAUGUGGGUGCUGGGGACUGACCCUGCAUCCUCCACA  
>N103  
UUAGCUUUCUUUGGCUGGGGACUUGGCUUUCCCUCCCCUG  
>N104  
UGGAAAGCAUUGCUUCCAAACUCCUUUAUGAACACAAUUC  
>N105  
UGUUGAGGUUACAGACAGGAACUCCCAAGUCUGCCUUUAC  
>N106  
CAAUGUGAAAAUUCUUCAGGACUUCUCCUGUCAUUUUGAAGG  
>N107  
AGAAUUUCUUGUUCCAAAGACUUGUUUUUGUUUAAGUUA  
>N108  
CACGUGGGCAGGAGCAUUAACUUCUCCAGAGCUGGGUUAC  
>N109  
CUAAAUCACGCACGGAGUGAACUCCCCGGAGCAUGUGAUGC  
>N110  
CUGUCUCAUCCCCUAAACAGACUACAGAAUUCUGCUCCUUC  
>N111  
UUCUACCUGAUUCUAAGAGGACUAAGUCUGUUAACAUCAC  
>N112  
UAAUUUAGUUGGUAGGAAAAACUUUUAGAAUGUUCACAAC  
>N113  
CAUGUGUGUAGUUAGUGAAGACUAGCGAAGCAGAGCAAACC  
>N114  
UAAAGGUUCCCGUAAAGCAGACUGUUAAGAAGGAUUCAACU  
>N115  
GGAGAGCUCUUUGGCAUGAAACUGCACAAGUGCAGGCCCGA  
>N116  
GACAUGGUGCUGGAGAAGAAACUGAGAGUUCUAGAUCUUGA  
>N117  
UCCCCCGAAACCAACCCAAACUUUCAGCAGCCUGAGUCU  
>N118  
CCACCAGCACUCCUCCUGAACUCUGCAUCUUGUAAAAGUG  
>N119  
UCCUGUUUCUGCUUCUUUGAACUUGCAAUGUAGCUCGACAC  
>N120  
UGGUGAGCCCUGGGGAUCAAAACUCAGGUCCUGCGGAAGAAU  
>N121  
UGAAUGAAAUGCAGGAGAAAACUCUAGCAGGAAGAGACACA  
>N122  
AUGUAAAGUCAGGUGUGAGGACUGCUUGCACUUUGAAUCAC  
>N123  
GAUAAACAUACAAGGUAGAGACUGGGCUUCCUGGUGCUGAG  
>N124  
CAGGGAAAGGGAGAGUUCAAACUGAAACAUAGUAACAUCAGG  
>N125  
UGGAGGGUUAUAUGGUAAAGACUUCUACUGACAUUUGGGGC

>N126  
AUAGCUAUUACAGACAGAGAACUUCCAGUAAUUUCCUCAAG  
>N127  
CAUGUUUAUACCAAGAGUCAGACUGAAGGAAAUAUCUGCACC  
>N128  
ACAAUGGUCUAAACAUUUGGACUGAAAGCCAGCCCCAAGUA  
>N129  
CCCUUUGUUUAAACACUUAGAACUGAAAAAGGAGAGAUUGA  
>N130  
CACACGAAAAGCCCAGAGGAACUGUGCGCUGAUGUAAGCGA  
>N131  
CGGAGGGUGAAGGUCUCCAGACUUUUUACUGCUUCUCCUUC  
>N132  
UGGGCUUUGAGGUUUCAAAAACUCAUGCCAGUCUGUCUGUC  
>N133  
UGUGGGGUUAAUUAAUAUGAACUUAUAUGAAUUAUGCCUU  
>N134  
CUUUACAGUAAUCAUGUAGGACUCUGAUUAGGGCCAAAUCA  
>N135  
AUAAGCUAAAGUCCUAAAAACUAUCAACAAAACUUUGCA  
>N136  
UGGGCGGUAGAGACAAGAGAACUUCUAAAAGCUGAUCGGCC  
>N137  
ACCAUUGUUGGGUAGUUGGACUACAAACUGUUAAGUUAUC  
>N138  
AAUAAUUUAAAUAUUUUAAACUAAUAAUUAACUAAAU  
>N139  
UUCAGGCUAGCUGGCUCAGGACUUUUAGUUCUCCUGUCUCU  
>N140  
UUUCCACUGCUAGAGUUAAAACUUUUGAUUAAUACAACAUG  
>N141  
CCUGAGAAUUUUUCAGGAGAACUUGGCUAGCCCGAGGGCCC  
>N142  
GUUCCCACCAAGUUGC UAAACUACUGGACUGACUUGGAAU  
>N143  
UUAUAUUGAACUGUGUUGAACUAGAUAGCCUUGGUUAUUA  
>N144  
GGCAAAAAGCCACCAAAGAACUCAAGAAGGUGGACUCCAG  
>N145  
CCACACUCCCACCCUUCAGGACUAUGAGCCCUAGUCCUGAG  
>N146  
AUUUUUUAUCAGAGAGUAGAACUGUUUGGAAGGAUUAGGA  
>N147  
CUGAUUCAUUAUGGGUAUGAACUGAAAGAAUUUUAGUUUUU  
>N148  
GAUAUCCAGCAACAUUAAAAACUGGGCAUGGUAGUGCACAC  
>N149  
UAAGUCCUUUGCUGUUAGGAACUCACAGCUCUCUUGUCUUG

>N150  
AGCUCAGAGAUUAUAAAAAGAACUGUAGUAAAGGUGUCACAA  
>N151  
UGUUUUUAUUGCUGUGAAAAGACUGUAUGACUACAGCAACUC  
>N152  
AGGACUCACUGUUUGUCGAGACUGGCUGGCCAGCAAGACCU  
>N153  
UUUUGGAAACCUUGACGAAGACUUUAUGUGGCUAAUGAAAC  
>N154  
CGGAUCCCCAAUACCUGAGAACUUUGCAUGGAAAGACAUGG  
>N155  
UAAAAGACUAGAUACAGGAGACUGGAUAUGUAGUUAGCUUU  
>N156  
UUCACAUGAUGAAAGUCAGGACUUGCAGUGCUCACUCACCG  
>N157  
UAACAAUUUAUGCUGGAAAAACUCUAGGUAAGGACAACAUU  
>N158  
AAAUGAACGAGGAUGGGAAACUUAAAAACUUAAGUGGCAG  
>N159  
GGUGGGCUCUGAUCCCAGGACUCAGGAGGUUGAUCAGAGC  
>N160  
GGAAUCAGGUGAGAGUUGGACUUCAGGGGUGCUGACAGA  
>N161  
AUGGUGUCAGAUACCAAGGAACUGGAUUUACAGAAGGUUGG  
>N162  
AUUUUAUCCCAACUCACAAACUUUUUUGAUUUCGUCCUCA  
>N163  
CUGAAAUGAUUCCUGGGAGGACUUUAGAAUAGAGUGCUGGC  
>N164  
AAUGACUGCUGAGGGAGAAGACUGAUCAGGGAAGUUGUAGA  
>N165  
UCUGAGCAAGAAUGAACAGGACUAAACCACUUGUAUGAAGA  
>N166  
UCUUUGAAAAGGGUACAGAAACUAGCAAUUUAUAGCUCAAG  
>N167  
UUAAGAGUUAGAAAUUGAAGACUAUGAAUACUAACAUUUAA  
>N168  
GGUGAGUGAAAGAAAUAUAAACUUGAGACCUGUGAUUCAUG  
>N169  
GGUGCCGACUGUGGACUUGGACUGAUGUUAGGACAGAAUUU  
>N170  
GGCGAGGCGCCACGUGGGAAACUGUGGCCCAGGGGGGAACA  
>N171  
UUCUAAAAAACUGGUGCAGACUUGGUGCUCUCCUCCCCAUG  
>N172  
UGUACAGGCUAUGAAUGAGAACUCAAUGCAAAGACAACAUC  
>N173  
UAAUUUGGAUGACACUCAGAACUGGCUCUGAUUGUGAUCUC

>N174  
UCCCUUCCGCUCGACUCGAGACUCGAGCCCCGGGCUACCUU  
>N175  
UGUUUUUAUCUGAUUUUAAGGAACUUAGAUUCCUUGCUCAUA  
>N176  
CUGCUGAUAGCUGAGGAUGAACUGUGGCUCGCCCCAUUAUA  
>N177  
CUUCUCCCAUUGUGGAAGAAACUCUCCUACUGGCUGCUUGC  
>N178  
AGGUGGUUACUGAGAAUUGAACUUAGGACCACUGGCAUAGC  
>N179  
GCAAUAGAGCAGUGACUAAAACUGUCUGGCUCAUGGAAACC  
>N180  
UUUGUUUUCUGUAUUUAAAAACUGAUGUUCAUUUUGAGACA  
>N181  
CAUUUUAAAAUUUAGUAAAAACUGGUGGCACAAUUAGUAA  
>N182  
GUAGAUUCCUUUGCAUUUGGACUAUAGAUAUACAGAAUUGA  
>N183  
CUAGAGGUCCUUGGUACUAAAACUGUCAAUCAAAGAAAACAC  
>N184  
CUUAUAUGUACGACCUAUAGACUAUCUGAGAUUAAAUCUA  
>N185  
AAGUACAGCCAGUCCUCAGAACUUUUUGUUUGCAAGGUUGU  
>N186  
UGUAGUCUCAAUUAUCUGGACUCCAGAGAUCUUUCAACA  
>N187  
UGUGAAGUUUGCAGUUUAAAACUAAUCAUCCUUCACAAACU  
>N188  
AUCACCAUGCCGGACCUAAAACUGAACUACAGAGCAAUUGU  
>N189  
GUGAGACUCCCAUGAAUAAAACUAAAUUUCAUUUACAAGC  
>N190  
UAGGAGACUAAGGCAAUAGACUUGUGAGCUCAAGCGCAGC  
>N191  
AAUUCCCGUACUCUAUAGAGACUAACCAUAAGUUCUGUGAC  
>N192  
ACCUACUAUGCAACCCAGAAACUCA AUGUGUUUAUUAUGUA  
>N193  
GUUUGGAAGAGCCUGAUAGGACUAUAAAAUCCUGGAAUAAU  
>N194  
GAAAAGUAAGUUC AAUGGAAACUGUAAAUGUUUAAAGAUAA  
>N195  
AUAAGGGAAUAGUUUUAAGAACUAUUGAGUUCUUAACUUCA  
>N196  
CAAAGAACUCAAGAAGUUAGACUUCAGAAA AUUGGGCAAU  
>N197  
UGUGGGUUCUGGGAAUUUGAACUUGAGACAUCAUGGUGUGU

>N198  
CAUAACAUUUCCCUUCUGAACUUAUUUACUCAUUAUUUAC  
>N199  
CCAUUUGAUGACUAACUAAAACUUCUCAACCUGUAGGACCU  
>N200  
GGGAAAAGGAAAUAUUCAGACUUUUCGGGGUCUGCUGGAU  
>N201  
AAUAAAGAUUUAAAAAAAAAACUGCCUGAUUAUUGAUACAGA  
>N202  
CUAGAGAAAGCACCCAAGGAACUAAAGGGAACUGCAACCCU  
>N203  
AAUCCUUAUUACUAACUUGGACUGAUUUUUUAAAAUUUAC  
>N204  
UAAUGUUGUUUCUAGAAGAAACUACUGAAGUCUGUGGUUUC  
>N205  
GGAUGACUACAGAAUGAUGAACUAUAUUUGUUUCACAGGAC  
>N206  
AUAAUUAGGUGCUCUUAGAAACUGUCUUGAGAAUAACCCA  
>N207  
UGACUAAAUGAUUUCUCAAACUGAAUUAUCAUUAUUUGUA  
>N208  
CACACCAACCCACUCACAAAACUCUUGACCCAAAUUUGUC  
>N209  
GAUCAAGCUGAUUCAUGUGAACUGAACUGUAAUAUCCUGAC  
>N210  
CAGUCUCUGGCGCCUUUGGGACUGCCGCCACACCCGCUCCC  
>N211  
CUCUCUUGCUCUAUGGAUAGACUUUGUUAUCAUUUUCUUA  
>N212  
ACUUGGAGAGCUGGGGUUAAACUAUAGCCUCUCAUUCUCCU  
>N213  
CCUGAAUUCUAUCCCUUGGAACUCCCAUGGUAGAAGGAGAC  
>N214  
GUUAGAGCUAAAUGUGCAAACUGACCAAGAAGAAAACAA  
>N215  
GGGUUGUGUUUUAGGAGGAACUGAAGUAUUGCAUUAUUCA  
>N216  
AUUAGCUAACUUUAGAUAGGACUGUUCUUAUCUCAGUUGUA  
>N217  
UCCCCAAUUCAACCAUAGGACUUAGCAACUUCUGUCCACU  
>N218  
AUUCAUAUGUUAACUUAAGAACUAGCAAGAGCUUGUCUUA  
>N219  
CACACAGUUGAUACAGGAGGACUUCUUCUGAGGUCAGCUAU  
>N220  
UGUAAACAUGAUUUCUAGAAACUUAUUUUGGCUUGUAACUA  
>N221  
UCUCUGAAGGAAGACACCAGACUCAGACAGUAUGCAGCUUA

>N222  
AGUUUUAGAUAAUUGGGAUAAAACUUAGUCAUACAAAAACCU  
>N223  
GCUGCCAGGGCCUUGUGCAAACUAUGGACACUUUGAGGUUG  
>N224  
CACAGACUACUGCAUGUAAGACUCCUGACUCGUUCUCUUUC  
>N225  
CCGUGGGAGAACAACAACAAACUGGUACAUAUAAAAAUUA  
>N226  
CAUAAAGGGAACUAUCGUAGACUGUUUUGGUCUUCAACUGG  
>N227  
UCAUGUUCAUAGCACUGUGAACUUAUUUUAAACUCCCCUC  
>N228  
CUCUCACAGUCUUUCUGUGAACUUACAGCAGCCAACCAGGG  
>N229  
AUGUAAUUUCAAGUUCCAGACUGUAUGAAUGACUCUCACA  
>N230  
AAGGACCAAUAUGAAAGGAACUUUUUCUUCAUAUGUGAUA  
>N231  
CUUUAGAUUAUUCAUCGAAAACUCUAGUAUUUGGUUUUCA  
>N232  
CAUAAUUCAUAAGUGUAGAAACUUAGGUAUGCAGAUGCUC  
>N233  
UUUAAGCUAGCUUCUGGGAAACUGUCUUGGUGAGUUUCUUC  
>N234  
AGUAUCAACUGAAUUCAUGGACUAUAUGGAGGGAAGGGAAG  
>N235  
ACACUGCCAUUUACACACAAACUCGAGGUCAUUUCCUUUG  
>N236  
GAGAAUCAAGUCACACUCAAACUUCGGGAGGGGUUGUGUUU  
>N237  
GUGGUGAGCAGAAUAUCAGACUAAAACAGAGAAGACAGAG  
>N238  
UAAUUUCCUUCAUAUUAAGACUUUGAAAUGAAAUCUUCA  
>N239  
GAUUUAUGAUAGGCACAUAACUGUGAAGGAAGAAACACUU  
>N240  
GAAGGAAGAAGGCUGAGUGAACUCCCAGUGGUGUUCUCAGA  
>N241  
CUGUCUGUAAAUGAUUCAAAACUGGUCCAUGAAGACCAGAA  
>N242  
GGAGGCUAGAAGCUUCCAGGACUAGCCUAGGUUAACAGACA  
>N243  
UUUCCAAAGUGUCUUGUCGAACUUUACAAUGAGAACCAGAA  
>N244  
UGGAGGGUACCAUGCAGGAAACUAGCAUCCUUUGGUUCUAC  
>N245  
UGUCUUUUUCUCUUGUAGAGACUGGAUUUCUUGUAGGAGGA

>N246  
CCCAUAAUCAACCUCCAAAGACUCUUGAAAUUUAAGGAUCU  
>N247  
UCCUCAGGCACAUGUCAGAACUAAAUCAUCUCUCUCUCU  
>N248  
GAUGGUGAGAGGGAAGCAAAACUGGUAGGAACUUGCUGAU  
>N249  
UUCUGUCCUAAAAGAUUCAACUUCUCCAGGGUCUUCUACCU  
>N250  
GGGUGCCACAUAUUAGGGAGACUCCCAGAAAGAGUCCUCU  
>N251  
AUAAGCUCUAAAGCCAUAAGACUGUCUCUGCUCAUCGGGGA  
>N252  
UCAGUGGGCUCGCAUCUGGGACUGAGCAGAGAGGGAGACUA  
>N253  
UCCUCUGAUACACAUAUGAACUCACAGACGCUGAGAGGGG  
>N254  
ACGUCCUCUCUAAACACCAGACUUGAUUUCAUUUCAAAGG  
>N255  
UCAGGAUACAAUUGAAAUGAACUGAAGGUGCAAUUGUUAAG  
>N256  
CAAAAACCAAACAAACCCAAACUUGUACUAUAUAAAUACUG  
>N257  
AGACAGAAUAUGAAAGAGAAACUCAAGUCCAGCUGUUGCA  
>N258  
UCAGUGUGUGGCCUCUGAGACUCGAGCCUUGAAAUUUUA  
>N259  
CUCUGCAAAAUGAACUUCAAACUUAACUAUUUCACAUGAUU  
>N260  
UCCUUUUGCUAGUCUGUUAACUCAACUUUUCUGAAGCCA  
>N261  
AGGUCACCACAACACAGGAAACUGAAUUAAGGGGCGCAGC  
>N262  
GGGUCCCACAACAUAGGGAACUGUAUUAAAAGGUUACAGU  
>N263  
CUAGUCAUUUGCCUAGAGGGACUGAUUGAGGGUUGACCCUG  
>N264  
AAAUUCUGGUGAGUUUGGAGACUCAGGGAUUUUCUUUAAC  
>N265  
UAGAACAUAAGACAAUGCAGAACUGGAUAAAUGACCUACUCU  
>N266  
CCAGCUACCGGACACUUUAGACUCGCCAUAGGCCUUGAAUG  
>N267  
CAAAGUCCCCGAGGGAGUAAACUUAUACUUAGGAAAGGUUA  
>N268  
CCCAUUAAAACCAUUGAAGAACUUUUAAAACAUCUGAAGA  
>N269  
AAAGUCAACUGUUUCACCAAACUAUAGUCCCAUUGGCUGU

>N270  
AGCCACUAAAUAGUUUAUAAAACUUGCUUAAAGAUUAUGAA  
>N271  
AUUCCAAUUGGGUGCUACAGACUUUUUGAGGUGCCCGGGAA  
>N272  
GCAACUAAAGUAGUUGGAGGACUUUUUUCCUGGACUCUUA  
>N273  
GGACCUUGGGGUGUCCGAAGACUCGGUGCCCAAGGUGUGUU  
>N274  
UAAAGACUAGGCCUCCUGGGACUAGCAACCAAACAUGGCAU  
>N275  
CUAGACAAUUUCUCAUGAAGACUCUUCACAGGUGAUUCUCG  
>N276  
CUUUGAAUUCAGUAGUUGAGACUUGUGAUCUUUCAGAGGAA  
>N277  
GUUCAAAACGGAGAAUAAAAACUAAAAACUGUGUUUCUUCU  
>N278  
GUAGCCACGAAUGACCUUGAACUUCUGUAGGACCAGUUUAA  
>N279  
AAAUAAACUACAAAAAAAAAACUUUUGGAGAUAAUAAUU  
>N280  
UCCAUCUUUGUACAAUAAACUCAAGGGUCACAGUUGUGU  
>N281  
GAACAGCAAUAAAAGAGGAACUGUGUGUUUAUUGUCCCU  
>N282  
AUGGCCAAUGAUGCCCUAGGACUGAGCAGCAACACCACAGC  
>N283  
AUUUGCAGUUCCCCCGAGGGACUGGUUAGUGAUCCAGCAA  
>N284  
GGCUUCAUCUACCAGAGGAAACUGGGGCUUCUGGAAAUAU  
>N285  
UCAGAAAAGCAGUGUUCAGACUGUCAGGUCUGCCUUGACA  
>N286  
CUCGCUACCCAAGCACGAGGACUUGAGUUCUGCCACCAUCA  
>N287  
ACAGAGGCCUUCUACGGGAGACUUAGGCAGUGGCUCUGAAG  
>N288  
CUUAUACUGGGGUUCUCAGGACUCCUUGGUUCUUUAUACA  
>N289  
ACUAACCAGCACAAUGC UAAACUGUACCAUUUUUAAACGA  
>N290  
UAUGAAGAGUCCCUAUUGGAACUCA AUGAAUGUGUUAGUUA  
>N291  
AAAAUCAUCUUCAGUGAAAACUUGGAAAUA CUUUGCCAC  
>N292  
UCAGAGUUACCUGGAUAGGAACUGCUCUGAAAUGCUGAGCC  
>N293  
UAUGGCAAGAGGAAGGCUGAACUUCAAGAGGGUUCAAGGAG



>N294  
GUCCCCAGUUCUGCUCCCAGACUCUAGCUUUCAAGAUCAGC  
>N295  
CUAACUUCUCAAUGAUAGACUACAAUGUGGAUGAGUAAG  
>N296  
CCAGAAAGAGAGCCUAAUGAACUCUAAUCUUUCUUGUAAAA  
>N297  
CAUGCAUAAGACCUGCUCAAACUCUAAACCAGACAAAAAUC  
>N298  
AUGUGAGAUUGUUAUACCAAACUAACACAUUCAUAAUAAGA  
>N299  
AUCCCUAGGGUGUAAUCAGGACUUCAAAUGUGUAAUUAUU  
>N300  
UCCAUUCCAUCCCUUACAAAACUAGCAUAACAAUAGCUCUG  
>N301  
UCAGGAUUUAGGGAUAGGGGACUUCUAGAAACAUGUCUU  
>N302  
AACGGUACCAAGCUGGGCAAACUCAGCACAGGCCAGGUGCC  
>N303  
UGGGGGGUGGGGAGGGGGGACUUGCCUAAUUUCAUCAAGA  
>N304  
CCUGGUUCCCUUAGUAAUAAACUGUUACCUGGAAGUGUACG  
>N305  
AUGCCAACAAACUGAACGAAACUCAGCAAGUGCCAAUAGG  
>N306  
CACAGCUAGACAUCUGGAAACUCUCAGAGAUCAAUGGCCU  
>N307  
GUAAGGAUCAUAAGUUUGAAACUUUUAAAAAUCCAUCACU  
>N308  
AAAGGUAUCUGAAUUUGAAGACUUACAUAACAAGUUUUUUAU  
>N309  
CCCAGAAGCUAGGAAAGCAGACUUCUCCUACCCACGCG  
>N310  
CUCUGGGUCCUGGGGGUUGAACUCAGGUCAUCAGACUUGGA  
>N311  
AGAUUCUCUUCAGUUGUAGAACUGUGCCCUAGGGAUGCUGA  
>N312  
ACCAAUGUCUUAUUCUGAAAACUUGUAUAUGAAUAGAGAGG  
>N313  
AUGUAGGGUAGGAGAUACAAACUUUAAAGACUGGCAUACAU  
>N314  
AAGCCACCUCUCCUACGGAACUCCUGUCCCAUGACUGCC  
>N315  
UUUAACCCAAAUGAAACAAAACUAGGGCUGAUGCUCAGCC  
>N316  
GGUCAGCAGCAGUUUCCAGACUUUCUAGCUACUCCUCA  
>N317  
AUGUAAACAUGAGUCCAGGACUCCCUAAUCGCUAAUCUUC

>N318  
ACAAAACUGUAGUCAUUUGAACUCCAACACCUAUGUAACAA  
>N319  
CAGGACAACCUGGGAAAGAAACUAAGUGUGUUCUCCUGCUU  
>N320  
AAAUGCAAAGGAAAAGGGAAACUGAGGCCACUGAACCAUCA  
>N321  
UAGAUAGCUGAACUGUUAAAACUUGAUUACUCUUAGCUAUU  
>N322  
UGGUGUCACCUGCAGAAAGGACUGGACUGCAGCAGAUGGUU  
>N323  
AGGUCUGGGCAUGACCUUGGACUGAGGGCCAAGGUCCCAU  
>N324  
AGAACUGUGAAAUGUCUAAAACUAAAAUUCUAGUUGGUAAA  
>N325  
UGUUCAAAUAUCUACAUUAAAACUUCUGCAUCCAACAAAAAU  
>N326  
AUUAGGUAGACUCAUUAAAAACUAAAUGACUCGGCUGAGGC  
>N327  
UCCAAUGAUUUUCCCAUCAAAACUAAUUGUCUGUGCAGAGCC  
>N328  
CAUGGGAUGGCAGCAAUGGACUCACAGACCACAUUUACAC  
>N329  
AUAUCUUUUGAGUUUCACAAACUUCAGGAUGCAGAUCUUGC  
>N330  
UGCCCAGGUCCCAGCACAAAACUACAAUCAUAUGAAAGCA  
>N331  
ACCAAUGUCUCUCUAAUUAACUUAAGACCUACUCAACAAG  
>N332  
GUACUAAACACAGUCAUAAAACUAAAGGAGCUAAAUGAAUA  
>N333  
AAAAAAAAAUUAGAAAGCAAACUAUUCCCAGCAUAAAAUUC  
>N334  
AGCCAAAGGUAUGUAGUAAGACUCCGUUGGGUGGAGGGGGG  
>N335  
AAAGUUCAAGACCAGUGUGAACUGCAUAGUAAUUUAAGGC  
>N336  
GGCUGUUAGAAUAUAGAGAAACUUUGUUGUUCUGUUUUGUU  
>N337  
UAUCACAGCUGUCUGUUUGGACUUGUUC CAGCUACUGCCCA  
>N338  
UCUUCACCUAGGGUAAUCAGACUAAUUUAUUAAGCAUGUUUG  
>N339  
CAGCUACUUUCCCCUUAUGAACUGCACUUCUCAUUCGGGCU  
>N340  
UGUAUAUACUUGAAUUUCAGACUUACGGCAAGUAUGUUAA  
>N341  
UGGCUGUCUAUCCAUUGGGGACUGUGUGGGUCUCAUCGAGG

>N342  
CAGUCAGGAACAACAUUAGGACUUGAGCAAGAACAUAACA  
>N343  
CUUAAGUCCAAAAAGGUAAACUUUGAAGAUUGUUUGUAUC  
>N344  
AGGGGAACUUGGUUCUGUAAACUGUCUUGGAAUAGUUAAGC  
>N345  
CUCCAAAACAUCCCCACUAAACUUGUUCUAGUACAAAUUCA  
>N346  
UUUACGAAUUCUGACUUGAACUUAUUGCUCACAGUCUUA  
>N347  
ACUUCACACUAAGUGAGGAAACUAGAAUGUGCCUCUCCCUU  
>N348  
UACCCAGGCCCAGAUCUAAGACUCUGAAUUGGCCACCCCA  
>N349  
GAAUAGAGGUCACACCAAGGACUAGCAAAGUAUAGAGGUUU  
>N350  
GUGCUGAGCAUCCUGUAGACUCGUCUUUUUAGUAUAAA  
>N351  
CAGAAACAUGUACGUGGGGAACUUACAUCGGGUUGGCAAG  
>N352  
CGUGUGUGGAACCGAGAACUAAGCCUUCUUUCCCCGG  
>N353  
GCUAAGUUGGAGAGAAUGAGACUAGAGUAAAGGAAUAUGA  
>N354  
AGUUUCAGGAACUUCUGAAACUUUUGAGUUGUUUUCUUC  
>N355  
GUAUCCUUGGCUGUCCUGGAACUAUUGACAAGACCAGGCU  
>N356  
ACCUGGCUAGACAUGGAAGAACUAGUGAUUUUACUUUGAA  
>N357  
UAGUGUAGGACAUUGGUGGAACUGGAGUUGUGAGACAGUUG  
>N358  
AAUAAGAACAUCUGUAAAACUACAAAGAUACAAAAGAA  
>N359  
CUACAAAGAUACAAAAGAAACUGGAGCUAAUAUGUCAGUA  
>N360  
GGUAUUCAGCUGUGGCAGGGACUUACCUAACAUUCAUGUCU  
>N361  
AGGAGGAUUCUUAAACAGAACUAAUACAAACAUCUCUAC  
>N362  
AUAGUACCUCCAUGAAAAACUUCAUCUGCAAUAGAAGG  
>N363  
AAGAUGCAGGAUGCAAAGGACUGACCAGCCAUGGGGCUCA  
>N364  
UACUCUACAACAUAUAUAAACUUUGCUGUGAACUGUCUC  
>N365  
AUUUUUUUUCAUAUAGAAACUUUAAAAGUAUUUAUAGC

>N366  
AGGACCAAAGGAGAGAAAAGACUGUCCUGUGACAGCCACAG  
>N367  
CCUUUAAAUAUUCUGAUUAAAACUAGCCAGCAAGGCAAAGAA  
>N368  
GCUUUUGGUCACUGUGUUGGACUGAAUGAGAUGUCCCUCGU  
>N369  
GAAGCAGUGAAUGAGUGAAGACUCGGGGUCUCCAGGAAUCU  
>N370  
CAUACUCUUAAGAAAAUGGACUCCCUCCCAUCAGGAAUAA  
>N371  
GGGUAGUGGUUCCUCCUAGACUGAAACAUUCCAUCUCUCA  
>N372  
GAAGAUGGCUCGGUGGGUAAAACUGUUUGCUGUGUGGAUCAG  
>N373  
GAAGCAGAAACCAACUUGGAACUUUCUAGUACUGUCCCUUU  
>N374  
UGCACCAGACAAAAGAAGGAACUGGAGACAUGACAGUCAUC  
>N375  
AGUAGUAAAGGAAUCCUAAGACUUAUGUGUGAAAUAUUUU  
>N376  
CUCUCCACGCUAGACAAAGAACUAGAGGCAACCAAGAAAUG  
>N377  
CUCUAGACUGAGUUAUGUAAAACUCCAAAAAGCAGGGGACAA  
>N378  
UUGUUGCACAAGUACAAAGAACUUGUGCAAUUCUCAAUUGU  
>N379  
UCUAAAGUUUUCUUCUGGAAACUAGGGAUUAUACUUGUCUC  
>N380  
GCUUCCAUUUCAUAAACAAAACUUGGUCCCUCUGACCGAUC  
>N381  
ACCAGGGCGAAGAGAGAGAAAACUGACAGAGUUGAUGUUUGA  
>N382  
UGAUAACGUCUGUUUAAUAAAACUGACUUAAGCAUGACAAGA  
>N383  
AGAGCUGUUCAAGGGAGGAGACUGCAAGCUCUGUAAUGUCU  
>N384  
GCAUCAAUAGACAGUCAGGAAACUAAAUAGCUUCCUGAGUG  
>N385  
UUAUCCAGGCUAGUCUCAGACUUGCUAUGUAGCCAAGGCU  
>N386  
AAGAGCAAUGAGGGAUCUAAAACUGCUGAGCCAUCUUUGCAG  
>N387  
GGUCCUGUGAAUAUUCAGGAACUGUAGUCAUCUGUCAUUGC  
>N388  
UCUUCAUGACAGUGUAAUGAACUCAGAUUGUGUGGUUUCCA  
>N389  
GGAUUAAACAACUUUUUAGAACUGAAUGGAAACAAAAGCAU

>N390  
CAAUACUGAACAAUAAAAGAACUGCUAGAGGUAUCACCAUC  
>N391  
ACUCAUUGGCACAGGAAAGGACUUUCUGGAUGGAACAGUUA  
>N392  
CCAGCCUGACUAUCACCGGACUGUCUUGGAUCUGCCAGUU  
>N393  
ACUCCAGCCUAGCCUCACAGACUGCUCCAACUGGGCCUGUA  
>N394  
CUCUGUGAUUGUCACUUCAGACUCUGGGAACCCCAUGAGCC  
>N395  
GGUAUCUGCCCCUGAGCAAACUGAAACAGCACAAUUGGUG  
>N396  
CCCCGCCCCCUUACAGACUCCUGAUUGUUUAUCAGUA  
>N397  
AACUGAUUUUGUCUGUAUGAACUUCUAACUUAGACUACUCA  
>N398  
UUGGGAGAAGUUAGGGAAGGACUUUAAGUUUGCAGAAGAAC  
>N399  
CUGUCUGGCUUUGGCUUUAGACUGGUAAGCUAUGAUAUAUGA  
>N400  
GUAUGGGGGUUGUGGGAAAAACUCUGUUAUUAAGGUUGAA  
>N401  
AGGGUGUUUCUCAAGCCUGGACUAAUUUGAUAGAUCUUUUA  
>N402  
CUUAUCGAUUUCUCCCGGAAACUCACAUGAACCCAGAAGUU  
>N403  
UCCUUUGUUUCUUUAAAAAACUGUAAUUUAAAGCCGGGCG  
>N404  
ACACAUACAUAACUACAAACUAAAAUGCACAAUCAGGAA  
>N405  
CAUGAUCACUGUGUCUAAGGACUUACCAGGAUGACCAAGAU  
>N406  
GCCUGUAACAACACUGUGGACUGGAGACUAAUACUUAUA  
>N407  
AUUAAGAAUUAUCCCUACAGACUUGCCUACAGCUUUGUCUU  
>N408  
GUGACUAUUAAAUUUCAAAAACUGUCUCACCAGUUGAAGAG  
>N409  
AAACUUCAGGUCUUUAAAAAACUCCUGUAAGGGCUGGUGAG  
>N410  
GCCACCCACCCCUCUUCGAAACUCACACAAUAUGUACUCAC  
>N411  
GGCUGCUAUUUACUCUCUGGACUUCUCUGUUACACAGCUCC  
>N412  
AAAAAUUUAAAAAUAAAAACUGGGUAAAAGCAAUUUUA  
>N413  
CCAGUGCUGAGCCAUGUUAAACUCUCGGUCAUGCUUAUAUGA

>N414  
AUAUGUCUAGUCUUACACAGACUCCUUGAUUUACAGCUUUG  
>N415  
AGCAACGGUGAGCACUGGGGACUGUGGGUCUGGGACUCCUA  
>N416  
ACAAGUGGUGCCACAGGCAGACUGGUUCUGUCUCUAAGUAG  
>N417  
GUCAUCACCUUGUGCUCAGAACUUGGCCACUUGCUCUCUUC  
>N418  
UUGUGCUCUUUGGUGGUAAACUGACCCUUUCCAGGUUGC  
>N419  
CCAGGUGUAACUCCAGAGGGACUUCAGAUGC UAAACUGCC  
>N420  
ACAGAAGCUGCAUUCAGAGAACUUGUGGGUUAUGAAGAGCU  
>N421  
GGAACAAGAGAGAUUCAAGACUUUUGACCCAACUUAUUAG  
>N422  
CAGCAAGGUUAAUAGACUGGACUGUGAAUCUACAUAGCCUG  
>N423  
UUUAAUUUAAUCACAUCAAACUUUAUUAUACACUGUAUGA  
>N424  
GGAAAAGCAAACAGAAAAACUGGAAAAGGUUAGGAAGU  
>N425  
GGACUUGUAGUGACCUAUGAACUUCAGGCAUCUCCCAAACC  
>N426  
UGUUGGGCCUUUGGAAGAGAACUAUGGUCACUUAACCUCUA  
>N427  
CGUCAGAACCAUUAUCCAGGACUGAAUACUUAUUGAGACUUA  
>N428  
UUACCAUGUAACUAAGGAGGACUUUGAAUACUUGAUCCUUC  
>N429  
UGACACUGACCUAAAAACAAACUCAUAGGUUGGUGAAUAG  
>N430  
CAUCAUAACUAGGUGGUAGAACUCCAUGGGUGAAGAUACCA  
>N431  
GAAGCAGUUGGAGGGAGCAGACUUGUGAGGGAUUGGAGAGA  
>N432  
CUUACUUAUUACUUCUAAGACUCUGGUUGCAGGAAUGUAU  
>N433  
AGUCGCUGCGUUCAGGAAAGACUUCCUAUCCUAAUGAAUGG  
>N434  
GAGAGAAACAACUUCUGCAAACUGUCUUCUGACCUUCACAU  
>N435  
AUCUCAUCUCACUGUAAGACUCCCUCUGAUUAGUAAUUAU  
>N436  
CUAGGAGAUUAUGACCCCAAACUCAGUUUCAGCUCUAAUGAA  
>N437  
GACCCUCCACUAAGCAGAGACUCCAGGUGAGCUGUGAUCA

>N438  
GAAGAUGAAGGGAAAAGUAGACUCUUACAUAGUAUCGGUGG  
>N439  
GCAACAAAAGAAGCACUAAGACUGUUGUCUGAGACAGUGUU  
>N440  
UCCCUUAAGGAUGGACCAAAACUAGGAAUUGUAAGUCAAAU  
>N441  
AGAGUUACAGGCUGUUGUGAACUUCUCAACAUGGGUGCUGG  
>N442  
UUUCAAAACUUUCUGUGCAAAACUCAAAUAAAAUAAUUACGG  
>N443  
ACCUAAGAAUUCUAAGGUGAACUAAACCCUUCCUCCCAA  
>N444  
CUAAACCCUUCCUCCCAAACUGCUUUUGUUCAGGUGUCU  
>N445  
UAAUUAACACACCUGGUAAAACUCAAGUGGCCACAUUCUUU  
>N446  
AUUGUAUCUCCAGUUUAUGGACUUAGCAUUGUUUAGUCUC  
>N447  
UAUUUCUCAAGUUAACAAGACUCCUUUAAAGAAGUAGAG  
>N448  
CUUGGUGCUUUGCUGGGAGAACUCCAUGAUGCCUCUCCUUU  
>N449  
UGCUCUUGGAUGUCUACUAAACUUGAUGAUAGACUAUUUC  
>N450  
ACUCGUGUAAAUCCCUGGAACUGGAGUUAGAGAUAGUUGU  
>N451  
UCUAAGGUAGUUAGAAGCAAACUCACUCGGUUAAGAUAAAC  
>N452  
CUGCACCCUGAAGAGUAAAGACUCUUCCCCAUACUGUCUCA  
>N453  
ACAUACAAGCUUAUUGGGAAACUACUCUCAGGCAGGCGAGC  
>N454  
UUUAAAUACUUGAGACAGAGACUUUCACUGAAUCUGGAGUU  
>N455  
UGCAUACUUGCAUCCUUGGAACUGACGCAGUGCAUACUUGC  
>N456  
AUCUGUAUGAGUGCACAUAACUAUACAAAACAUGGGUUU  
>N457  
ACUUUAUGUAAGCUGCUUAGACUCCAAUAUCAGGAUUUGAA  
>N458  
GAUCUAACUGGGAGUUGCAAACUAGAGUUCUACUAUGUCCU  
>N459  
AAAUCCUGCAACUCAGAAAACUUCCAAAGUGGGUGCACUA  
>N460  
GGGAGCUGUAUGACCGAAGGACUUGCAAUCAGCACUUCUAU  
>N461  
GACAUUUGCAUGGGCACUGGACUGUGACAGUGCUGGGCUGA

>N462  
GCAGCAAAAAAAAAACUUUCAAAACUAAGGACAUGGUUCACUGG  
>N463  
ACAGAUGAAGAAACAGAGAGACUGGAAGUGAGGUAGCUUCC  
>N464  
CACAGUGAGUACCAGGAAGGACUAUGCUUGAGUGGAUGCUG  
>N465  
CUUGAUACACGUUCCUCCAGACUUUAGGUAACUGUUUGUUU  
>N466  
UUCCUUAGUAAUUCACGAGAACUCUCUGUAUAGUGAGCCUA  
>N467  
GAGUUUACAGCCAGUGAGAGACUCUGACAAAGAAGAAGGUU  
>N468  
UAAAAGUUUCCCAAGAAAAACUAGAGGAAACUAAUUGUUA  
>N469  
AACUUGUAGAAUGAAAUUGGACUAGGAGUUAGCACGGUUUU  
>N470  
GGAGUCACUGUACCACCGGACUCAUCACAGGAAGACUGGC  
>N471  
CAUUGUGAGGCAGAGACAGGACUCAGUGACUCUAGGUUAUA  
>N472  
CAUAGUCAGUGCACCCUGAAACUCACUGCUUAGGCUAGAAU  
>N473  
UCCUGAGUGUAUGUGGGCAAACUUCUACUCAAACAGAUAGG  
>N474  
UCUGUUUUUCUGAUUUGAAAACUGAGUCUUGUGAAUCUAAA  
>N475  
CAUUGCACUUUUGUGAUCAAACUCACAUCCACACAUUCACA  
>N476  
AAAAUCAAUUAGAAACGUAAAACUCGUGAAGUUAAGGCAUUC  
>N477  
UGUCUUUCAGAUACAACAGGACUGAUGCAUUAUUAAAUUCA  
>N478  
UGGGGAGGUUUAUUGUGAAACUUAGCAACACAUCAUAGCC  
>N479  
AUUAAUUGAGGCAUUCUAAACUGACCAAAAUAACAGAUUA  
>N480  
CAUUUUUAGCAGAUUUGUGGACUCAAGGAAAUUGAAAUUU  
>N481  
CUCAUACCUGUAAAACGAGAACUUAGGCCAAUGUUAAAUCA  
>N482  
AAGAAGAGUUCUACCUCAAGACUCAGUUUAUACUACUCCUGG  
>N483  
CAGUUUUUCUCAAACAGAAAACUGCAAAACAUUGCCUGGGG  
>N484  
UAGAUUAUAGAUAAUGUCCAAACUCCAGCCUGCACAUCUAU  
>N485  
AGAAUUAUUUAAUCAAGUGAACUUUUAAAAAUGUGUAGUA



>N486  
GGUUAGAGGGAGUAAAAGGAACUGGGGAAUAAUGAAAGUAU  
>N487  
GUAGAGAGCAAUUGAAGAAGACUUACGGCAUCAACCCUCAU  
>N488  
AGUGCACAAUACAUUUAAAAACUUCAAUUACAUAUUUUGU  
>N489  
AACAAUUUAUCAUUUAACAAACUCAGAGAACAAUUCUAGGU  
>N490  
UCUAGUGAGGAAAGAAACAGACUUAGAGUUUAAGGGCUGUG  
>N491  
GCUCAUCAAUCACUGCAGGACUAGGCACAUCCUCUCCCAC  
>N492  
UCUAUCCUCCACAUGCAUAGACUAGUAUAUCUGUGAGUAGA  
>N493  
AUGAUCUUGUUAUUGUAGAGACUUCUUGGCAGUAGAAGACU  
>N494  
UAAAAAAGGAACAUGUGGAACUUGAGACAAGAAGAAGGUU  
>N495  
UUUUUCUUUUGCAGAGGUGAACUAAAUAUUUAUCAAGUAU  
>N496  
UCCCCUAGCUGAAUGAAAAACUUCUGCUAUGCCUUUCUA  
>N497  
CAGAGCACAUGGGGUGGAGAACUACCCUUGGCACAUGCGCA  
>N498  
UCACUGUAUAUAUAGCAGGAACUUGGACUGAGUACUGUCUC  
>N499  
AGUUUCUUGACAAGUUACAGACUUUCAAGUCGCUAGAGUGG  
>N500  
CCCAUGGUCCAGAAAAGGACUAAACUCAGGAAUAACAGU  
>N501  
GCUUAUUUCACUUAGUGUAAACUCCUCAAGGUCUACCCAUG  
>N502  
AGAACCUCUGCAAUGAAGAAACUCCAUCUAUUUGAAGAUUA  
>N503  
AUUUGGUAUUCUAGCAGAAACUGGGAAUUAAGCAUAUACA  
>N504  
UGCAAUGAAGUUACAUAAGGACUUAUCUAAUGGCUAGUUGU  
>N505  
GGCUUAUCCAAGCCCUAAGACUAAACACAGCACUGAACUC  
>N506  
UCAUGGCACCAUGCAGGCAGACUUGGUGCUGGAGGAGCAGG  
>N507  
GACACCGCAGAAGGUAAGGAACUCUGGGAAGUAGAAUCAAG  
>N508  
UCCAACUUUCACUGAGAGGACUAUGUCUGCCUUUCUCUAC  
>N509  
UUAUGCAAGCGUUAUCUAGAACUCAGAGAUGUUGUAAAUA

>N510  
UAAUGUGAGAUUGGUUUAAAACUAGCUGGAGCCUAAGAAAU  
>N511  
AACCCAAGGGAAGGGGUGAGACUCCAAACUUCAGGCCACAA  
>N512  
AAUCUGUUUUAGUCAGUAGAACUGAGACCAGUGGGUUACCU  
>N513  
CUAGAUACAUAAGGUAUGAGACUUCCCACAAGGCUUAUCUC  
>N514  
AGGAUGAAAGAGGAAAGGAAACUGGGCUAGAAGGCAGAUCU  
>N515  
CUGCAACUAAUAGAAAAGAAACUGCAGAAGAGCUUCGAGGA  
>N516  
UUAAAUGAAUGGCUUAGAAAACUUAUUGUCCAGCAUCUCU  
>N517  
GGAUGAACUGUGGCCUAGACUUAAGUCCCCAUCCACCAA  
>N518  
GCACAGGGGAGGGAGCAGAGACUGAGGGGAUGGCCAACCAA  
>N519  
UUUGUAGGCAGAUGGAUGGAACUAAAAUGAUCAUCCAGAG  
>N520  
ACCAUGGUAGCUUAAAGAGACUGAACAACCAGAAAGCAUG  
>N521  
CAGCUAAGUCUUUAUGUGGGACUCCUUUCAGCAGGAAUAGA  
>N522  
GGGAGGCCUCCUUUUCGAAACUUUUCUGAGGAGAAAGAGU  
>N523  
GAAGGAAGGUGAAAAACAAAACUGCCAAUGGCCAGAAGCAA  
>N524  
UCUAUCCCUUAUUUGGCAGACUGAAGCUGACUACCAAGAU  
>N525  
AAAAAAAAAUUCAGGGACAAGACUGUGGAAAUGUGUACUCA  
>N526  
AAUUCAGGGUGUAAGGAGAGACUGACCUGCUUGAAAACAA  
>N527  
CCUCCCCUAAAACCCAGAAAACUCCACAGAACAGGAGGCAU  
>N528  
UCUUAUUGACUUAGUUUUAAACUCAGUCCAAUACUACUAAU  
>N529  
UUCACCCAAUCUGUUCACAGACUGAGUAGAACAGGAAGAUC  
>N530  
UGUUUCUCCAGAGAACCAGACUGGAAACAAAAGGGUUCUA  
>N531  
GCAGGAACCUAGAGACAGGAACUGAUAACAGGGGUUAUAGA  
>N532  
ACUGAGCCUCCAUUUUCUAAACUGUAAAAUAAUGAUAAAAU  
>N533  
AAGGACAAUAUUUAAUUGGGACUGGCUUACAGGUUCCGAGG

>N534  
CCGUGAAGUAAUUCUCCAGACUGUUAGAUAGACCACAUG  
>N535  
UGUCUCACAGCAUCUAAGAAACUACAGAUGCCAAACUAGAC  
>N536  
UAGAUUUCAUUAUUAGCAGAACUAGCUUCACUGAUUUAGAA  
>N537  
ACCACAGAAAUAUACACGGGACUCUACCCACUGCCUUGCUA  
>N538  
AAUCUAUUUACUCAAUUUAAACUCUUUCUCAUUAACCAAGAA  
>N539  
CAAGGUAGACAGUAGUUUAAACUCAUUGAACAGAACCUUGC  
>N540  
CAAGGCUUCACAUUCACAAAACUUCUACAGAAGGAGUUGC  
>N541  
AUGAAAGUAACAAAUAUAAACUUACCUCACUCAGGAUGAU  
>N542  
GAAUUUCAGAAUAAGGAUGGACUGCCUGGAAUUUGGAGCAG  
>N543  
AAAUGUAGAUUAAAACGUAAACUAAAAUCCAUGAAAGGAG  
>N544  
CUAAAAUCCAUGAAAGGAGACUAGCAUUGCCUCUGUGGCC  
>N545  
CCAUGUCCAUUUAGCAGAAAACUAGUAGUGUGUUCUCCUA  
>N546  
AAGCUCGAUAGCACUGAGAGACUCAGCAGAUUUCUAGUACC  
>N547  
UCUAAAUGGAAGCUUAGAAGACUAGGACUGACCUCUGGGUA  
>N548  
GGGAGGGGGAGGGAAGAGAGACUGCAGGGAGAAAUCAGGGA  
>N549  
AAAGCCCCUUUUAUGAAAGGACUUUGUAGUGGGAAGACAGG  
>N550  
ACCCAAUAAAUAACAGAACUUUAGACAUUCACCGCUUA  
>N551  
UCUGGUAUACAGACUGCAAAACUCAGUGUAGUCAGUAGAUG  
>N552  
CAAUUUUCUGUCCUAUGUGGACUGGCUACACAGUACUUGAU  
>N553  
CCCCACAACAGCACUGUGAACUGCUUCCACCUUCACUGUG  
>N554  
GGACAACCUGGAGACAUCAGACUCAUCCACGUGUUAUUC  
>N555  
CUGAGUUUCCACACCAGGAACUGACCACAUACUGAUACAC  
>N556  
AGAGCCUUGGGUGAGGUAAAACUAUAGUUAGAAUAUAAUUAU  
>N557  
UGAUUUUAAAUGAAAGAAAACUAAUCUGUCCACAGAAAUG

>N558  
GGGAAUUGGGUGAGACGGGGACUCCUGAGGAUGGCAGCCAG  
>N559  
UUAAGAGUGUGUUUUUCUGAACUUGAAAUUGGUCCAUAAAA  
>N560  
AAGAUACAAGCAGAGCAAAAACUCCACAACAGCAUGAAGUC  
>N561  
ACAUUGGAGCCUAAAUCAGACUGGACCUGAGCGCCAGCCC  
>N562  
AAGACAGAAAUUGGUACCAGACUCCUGGAACAUUUCUGUAA  
>N563  
AUUCCUUUAUUUAUGUCAAAAACUCUGAAUGCAUUGGGAGAG  
>N564  
UAUCAAUUAAAAUGACAGGGACUUACCUAGACAGUUACCCG  
>N565  
AGUUUGAGAACCAACAUUGAACUUUUAGGUUAUAUCUGAUU  
>N566  
AGGUUCCUGAAUCCUCUAAAACUCGUUCUCUUUACCUAACC  
>N567  
UAUCCUUAUUCAGAUAGGGGACUGAUUCCAGUAUAUAUAA  
>N568  
ACAUAGCUUCGAUGCCUGAAACUCUCUCUUUUUAUCUCGUGU  
>N569  
GCAGAAACCUGGAGGCAAGAACUAAAGCAGAGAAAUAAAAG  
>N570  
AGCUUAUGCCAAAGCUAUAAAACUGUGGUGCAGAUGCCUGAG  
>N571  
GUCAAUUGUACCUCCAAGAAACUGCCAGUGCUCGUUGGAUG  
>N572  
GAACUUCUGGGAUCUUUGAACUUGUAUUCUGUAUGUUUGU  
>N573  
AAGACGAGUGCAGCAAUGAACUAUGUUGGUUCCAGCAGUG  
>N574  
UGUGUUCAUGGUAAGAGCAGACUGCCCACAGUUUAUUGUAA  
>N575  
AAGUUUAAAAAACAAUCAAACUGCAUGGCUCUGGAACUCC  
>N576  
CAUUUUUUUAUAAUAGCAUAAAACUUUAAAAGUUUUUUUUUU  
>N577  
UUUUGAAAAGUAUGAUUAAAACUUGUAUAUAUCCAUGUGUA  
>N578  
AACUUGAUGAAGUAAUUGAGACUGUUAUUAUGUCUGAAUGA  
>N579  
AAAGUAAAUAGAUACACAGACUUACUAUAUUUAUACUCUGU  
>N580  
AAAUUAUCCAUUUUUCAAGACUAAUAGUUUGUGUUGAGUU  
>N581  
AGAAAAAUUACUCUUGAAAACUUAUUAGAAUAGAGAAU

>N582  
UGCACAGUGGGAAAUUUCAAACUACUGGUUAGUUGCACCA  
>N583  
AUGAAAGGAGGAGCAUAAAAACUACAGGACAAGAACCUUAA  
>N584  
CUAGAGGCAUCCCUACAGGACUUCUGGUGUCAGGGGCUAA  
>N585  
AGUCUUCCEAACAUUCAUAAAACUAGAGUCUGAGGUGUGAGU  
>N586  
CGAAUGCUUUGGGAGAGCAAACUCUUCCECAGGUUAUAGCC  
>N587  
UUUGGUUUGAGAAAGAAGAAACUAGGAGAUUCUUGUAAUAGG  
>N588  
AAAACUUAGAUGUGUCUAGGACUAAAAGCUUGUAAUUAUUA  
>N589  
AGCCUGGGGUGAGACUGAGACUCUGGUACAUGACAGUGAU  
>N590  
UCCAGGAACUAGGAAAUGAACUUUUCUCUCCAGGGAAAG  
>N591  
GUCAUGCAAACCCACCCAAACUGGGCUUUCUGAGUCUCAU  
>N592  
UUAUGGAUCAACAAAUA AAAACUGAUACUAUAUGAUUAUUC  
>N593  
GUUUUGGAAUAAGUUGCAAACUAAGGUGGGUUUGGGGGGG  
>N594  
CUUUUGAAUAAAAGCCGAAAACUAUCCCUAAGAGGUAAGU  
>N595  
UGAGUUUGAUGUAGCCUAGACUACAUGAGACCCAAUCCA  
>N596  
CUCUAAAUCUGUCAAUAGAGACUUAUUGUCCUCCACCCCGC  
>N597  
UAAGUGUUCAAAUCUGCGAGACUAUGGGGAACAUUUCUCAU  
>N598  
CGUGAUAACUGCAUCACAGACUAGCACUGACUAGAACUGA  
>N599  
UCCUGUCCACAGUAACACAGACUGUAGUGCAUGGUGACCUG  
>N600  
CAAUCAUGAACAGUACAAGAACUGCUGGGGAUCCUGCUGUA  
>N601  
CUGUGCUUCUUGUAGGCAGGACUAAUCUUGGAAUGAAGGUU  
>N602  
UCCAUCAUUGCCUGCAAACUUCAUGAUGCACUGUAUUU  
>N603  
UACAAGAGACAACGUCUUGAACUGGGCACUAAUAGCCCGGG  
>N604  
CAAGUUACUAUGCGACCUGAACUACCCAUCAUGAGCUGGGU  
>N605  
GCUAAAACCACCAUUCAGGGACUGACAGAAUGCCUCAUCUA

>N606  
AAAAAAUUCUGGCUACUUGAACUGUAUCUCCAUUCUGUCCC  
>N607  
GGUGGAGAGAGGGGGUCCGGACUGGGGAAUCAAGUCAACU  
>N608  
AUUUGACCCUGUUUGCCUAGACUUUACUGUUUGGCUUUGGU  
>N609  
CACCUGAUUUGGUGGUCCGAACUUCGCUCAUUGUUGUGACU  
>N610  
AUGGGAAUGUCCACACUAAACUACUCUGAGAACUGGUGAA  
>N611  
CUACUCUGAGAACUGGUGAAACUAACUUAAGGUUUUAAAC  
>N612  
UGCUUCAAGCCUUGGUGAAACUGCUUGCGGCUUGGCCAGA  
>N613  
AUGUGGAUGCUGCGGACGGAACUCUGGUCCCCCUGCCUGUC  
>N614  
UUAGAGUUUUCUUUUUAAAAACUUUUUAAAAUCUAAAUG  
>N615  
UAAAGAAGACAAGGAAAAAGACUAUGAAAUGAAACAGCCAA  
>N616  
AUUACCCAAACCAGCCUGGAACUGAAACCUAUCUAAGCAA  
>N617  
ACAAAGGAACAAAUGUGUAGACUUCAAUGC UAAUAAAGUU  
>N618  
UUGGGAGCAGAAGUAGGUAGACUUCUGGGAAUUUGAGGACA  
>N619  
GGAAUGCUGUGUGACAUAGGACUGUUUCUUGAUAAUCUGUC  
>N620  
GACUCUGACUCCAGGUUAGACUUUCAAAAGGCUUGAAAGCA  
>N621  
GCUGGAGUUAGAGGCUACAGACUUAAGGAUAAGUGCUU AAC  
>N622  
UUCAGAGAACAGAAUGAAAAACUCACAGCAGAAAAGCAAGC  
>N623  
AUAACAAAUGAAAGACAAAAACUACAGCACUUCUAGAAAUU  
>N624  
AUAAUAUAACAAAAAGAAAAACUAACUAGAGAACUGGAAGG  
>N625  
AGAGACCUGGGAAAUAGGAGACUCUCAGGACUCAAGGGAG  
>N626  
AUGAUAAAAAUACUGUUUAAACUAUUUUUGAUAAAAUAAC  
>N627  
CCCUGACAACAGUCGCCAAGACUGACCGCCUGAGUCUGAUC  
>N628  
AUAGACUAGGCUAGUCACAAACUCAGAGAUUACUCUGCCUC  
>N629  
CAGGAGAUUUUUUUUGAAAAACUCAAGAGUUAUUUUAGACA

>N630  
CCACUCUACUACCCUCUGGAACUUUGAACUCCAAAUUAAA  
>N631  
GUGACUUCUGUAUCCCAAGGACUGGUAAAGAAACUAAGGGA  
>N632  
GCAAUAUCUCCAUGUUGGAACUUUGAAGUAUUAGUAAUUG  
>N633  
AUCUUGUCUGUCUGAAUUAAACUAGAUUAUAUCUUAGUGAU  
>N634  
AGGGUCAGGGCUGUUCUCAAACUUGGUAUGUAGCUGAAAUG  
>N635  
UUCAGUGUGCCCAUGAAAAACUAGAAUCAUGUACUUGACU  
>N636  
AUUUUUUGAAAAAAGAAAACUUAUUUCUUUAACAGUUG  
>N637  
GGAAACAUAACAUAUGGGAACUAAGGACCCUUGGUACUGG  
>N638  
GUAACAUCCAGGAAGUGAAACUUUGGGUUGGUUGAUUAU  
>N639  
AGCCAAGCAGAGUCCACGAAACUAGAACAAGGAGCACAACU  
>N640  
UGACUGUCAAUAUAAGGAACUCUUUCAAGUGGUCGGUC  
>N641  
GUGUCCAGCUAAAAGCUUGAACUCUUUCUGUUUUAUGGUG  
>N642  
AUGUCCAUUGAUGUGACAAACUAGUGACAGUGAAAGGUGU  
>N643  
CACAGCCUUUUACUGUAAAACUGACCAUUGUCGCACUGGG  
>N644  
GGAAUAACUAUUGAUUAAAACUUAGUUUUUCUAAAUGUU  
>N645  
AGAAUUUUGUGUCUGUUGGGACUUGAAGUGUUUACCAUUA  
>N646  
AGCUGAGACACUUGGAUAGGACUUAGUAAGGAUUCUUUUU  
>N647  
AUGCAAACCUAAAAAGUAAAACUCAAAACAAGCCGAGUUG  
>N648  
CAACCAAAUAUCUAGCAGAACUGUAACCCGUUAUUGGAAG  
>N649  
AGUGAUAGGCCGGUCACUGGACUGCCUUUCCUAGUCUCUU  
>N650  
GACUGGCCACACUGGCCAGACUUGAGCUUCUGAGACCUCA  
>N651  
GUGCUUUGCAAUUUGAUGGAACUUCGACUUCAUCCUGAUU  
>N652  
AAAAAAAAGGACAAAUGAACUCUGAAAAAAAAAAACCCU  
>N653  
GAGGGAGAGGGAGAGGAGAGACUGGCAAUUGCCUUUGAAAC

>N654  
AAAUGGCUUUGGCUUAUUGGACUCUUUGUGGUUUCAUAUAA  
>N655  
CUCUUUGUGGUUUCAUAUAAAACUUUAGAGCGGUUUUAAUAU  
>N656  
CUGGUUAGUUUUUGAUUCAGACUAAAGUAAUCUGAAAAGAU  
>N657  
CCAGGGAAUAGCUUCAGUGAACUCAGCCAACAAAGGAGCUG  
>N658  
ACACAAGCUCCCGGGGUGGAACUUUGCCAUUAGUAUUGUUU  
>N659  
UUCUUGCUGUGUCUGCUCAGACUGUUAAAAGCAAUGCCCG  
>N660  
GGAGUGGAUCAUGGAGAGAGACUGGGAGGAAAAGUGGGCGU  
>N661  
GGUAAAGAAGACAUACCAAGACUAACUGCAGGGAGACAGAU  
>N662  
AGAGAUGUGGGGGAUUUUGAACUACCCAGACAAGGUCAGAG  
>N663  
GAUAGAGGAGACUGAGGUAGACUAGGGGAAACUAAGGUAAG  
>N664  
CAAUUCUCAUGACUGAAAGAACUAUACCACGAUGUGCUAGC  
>N665  
UGAGACCUACAGCUGAAUAAAACUCACCCCUUUCUAGUUCU  
>N666  
UUUAAAGCUCUUUUCUUCAGACUGACACUUUUCUUCAAGUG  
>N667  
GUAGAACAAAAUAUAACAAACUCUGCCAAGUAUUUUUUUU  
>N668  
AGUAGAUCAAUCAAGUCCAGACUGAAGGACGCAAAGACUGA  
>N669  
UUUUAAAAUUAUUGUUUAUAAAACUCAGGGCUUCACUCAUGAU  
>N670  
UUGUCAUACGGAAGGCUUAAAACUCACUGCCCGUGCUAAUGA  
>N671  
AGUGUAGAAGGGAGAUGGAGACUACUCUGUCCAUUUUUAUAG  
>N672  
CCCGGCUGUUAAUAGUUGAACUCCCCAAAUAACAGAUUACA  
>N673  
UGCACGCCACGUACUAUAGACUAGGCAAAAUAUUCAUGA  
>N674  
UAGACAAGAGAUACUCAAAAGACUCA AUGCUGAAACUCCUC  
>N675  
CUUGGAUGUCUCAGUAUAGAACUUGGGGAAAUCUGGUCUA  
>N676  
UCUUUUGAUUGAUAAUAGGAACUUGGAUACAAGGUGGCUGA  
>N677  
UCCAAUUCUGAUCCUUUGAGACUUCCAGAUACUGCUCCCAA



>N678  
CACAGCCUGGCAACAGCAAAAACUGGUUGUAUGGUGUAGAUG  
>N679  
ACGGGGUUCGGUCUCCAUGAACUUAUCUUCAGAUUGUUUCC  
>N680  
GGCUGAAUGGUGGCUGCAGAACUGGUUACCAUGGGCUGUCA  
>N681  
AAUGAGCCCCAGUAGUCCAGACUCAAGAAUAAGUCCAAUAA  
>N682  
UGGAGAUUAUUAAAAUCUAAACUCAAGGGUUACACACUCCU  
>N683  
UUUAUGGAGGACCAUAAAAAACUGUAGGCUUCAGUGAUGCC  
>N684  
UUUAUUAUGCAGCUCACAGAACUGUUUCAUUAGAAAAUCU  
>N685  
GGGAAAGCUUGGAGACUGGACUAGUUGC UUCCUCUCAGC  
>N686  
UUUUUUUGUUGC UUUGUAGACUUAGAAGAGACUCAGAAAA  
>N687  
CAUGGCAGUUUGUCCAUGAACUGAAAUAUACAGAAAAAA  
>N688  
AACUUGGACUACAUAAGAACUCCAUCCAGCUCAGGGGG  
>N689  
GGGCCAUGCAGAGCAGCCAAACUUGAAGAAUGCUUCUCUAG  
>N690  
UGGUGACCAAAGCUCUUAACUCUCUGGACCUCUGCAGUC  
>N691  
GAACAAGGUGCUUCUCGCAGACUAAUUAUUUACGACUGUA  
>N692  
GGACUUGCUCUUGUAGGAGAACUGGAUUCUGAGGAUACCAU  
>N693  
CAUGAGGCAUCAUAUGGAAACUGUAAUUCAGUGAACAUUGU  
>N694  
UGUAUCCUGUGUGUUCUAGACUUGAUCUCUUGAUUAUAUG  
>N695  
GCUCUCUGCCUCCCAGAGGACUGUGGUCUCAUCCCCAUG  
>N696  
UUCAAGUAGAUAAACAUGAAACUUAUUGAUUUUCACACA  
>N697  
UAAGUAAUAAAGUAAGACAGACUUGCACACUCCUUUGCAA  
>N698  
AUUCUGUGGGGCUAGUAAGGACUUUGGCAUGAGUUUGCCUC  
>N699  
GAAGCAUAGCUUCCCUCUGGACUAAGGGCACAUUAUUAUUC  
>N700  
GAGCCACACCAUAAGGAAAACUGACUCUCCCUCGAAUCA  
>N701  
ACACCUCUGGGAAAGGGAAACUCAGUUUUCUCCAAUUGAG

>N702  
UAAUUGC UAGGCCAACUUGGACUACAGAAUCUCAAAACAAA  
>N703  
AUCCAGGUUCAGUUUCCAGAACUGACAUCAUGCCUCACAAC  
>N704  
CUAUGUUUCUCACUACCAAGACUGUACAGUAAAAAGCAACC  
>N705  
UAUUUGCCCACCAAGCUCAGACUCCUGAACAUUUCAGCGUG  
>N706  
CUAACACCUGCUGCUUCAGGACUAGGCACAUGGAAAUCGAG  
>N707  
AGCCAGGCAGGAUACUAUGAACUAGUACACGCAAUUGCACC  
>N708  
AAGGCUACGUGAGAGUGGGAACUCACACGCUUACCUCUCAG  
>N709  
GCUAUAAACAGACCGGAUGGACUGGGCAUCUGCAUGGCCCA  
>N710  
UCUUGAUAGAAUAUCUGUGGACUGAGGGACAAGGGAAGAAU  
>N711  
AAGGUUAGCCUUCAGAGCAGACUCCCACUAAGUUAGGAAGA  
>N712  
CCCUGAACUAUGUAAUCAGAACUUUUCAAUAUCAAUAUCUA  
>N713  
GGCAGGGUACCAGCAGGUAGACUCUCUGACCUGGACCUCCA  
>N714  
CUGGCAGAUCUGCCAUCUAAACUGGGGGCCUCUUGUUAGCU  
>N715  
GGUCUAAUUCUCUCUUCUGAACUCUCGAGGCAUUGCACACA  
>N716  
ACGACAUGACUAGAAAAUGGACUAUGGGGAGAAGAAAAAGC  
>N717  
UCUUAGUAUGGCUGAGUGGGACUCUGACCUAUGGGUAUCAC  
>N718  
CUCUCCGGUGCGCCUGAAGACUGUGACAGUGCUCACAUAC  
>N719  
CUUGCUCUAUAAGCAGAAGAACUUAGGUUUGGUUCAGCAGC  
>N720  
AAACAUCACAGUUUCCAGAGACUACCCCACCCGGGGAUCAU  
>N721  
CUAUAGUAGUGUAAUUCAGAACUAUUAAAACAUCAAGGGCU  
>N722  
AUGUGUGGAUGUCAGAGGAAACUUUUUAUAGUCUCUCAUUC  
>N723  
AGGCAUCUGGAGCCUAGAGGACUACACGUGUGCUACAAGGG  
>N724  
AUUCCCCAGCAAGGAUGGGAACUUAGAUGCAUUUCCCUUCC  
>N725  
UGC UUGAGGG AUGCUAUAAAACUGUAGCUAUGUGCCACCCA

>N726  
AGAGUGACACAAAUAUCCAGACUAGAGUGAGCUACCUAAUU  
>N727  
UAAAAGAAUAGGAAGAUAAAACUCCCCAAAAGCUGCCUCUA  
>N728  
ACAAAAACAAAUAAAAAAAACUGUCUCAAAAAACCACAAU  
>N729  
UAUGUAGGUCUUGGGAUAGAACUCGAGUCCCCGGGCUCAG  
>N730  
ACAUGAGAUCUGUUGUAGAACUGGGAAAGGCAGUCUGGUU  
>N731  
UAAUUGCCUAAAACCACGGACUGCCUCUUACACUGGGAU  
>N732  
CCAGGGAAGCCAGGGCAGAAACUGAUGCAGAGACAGCGGAG  
>N733  
AAUAAUAACAAUAGUAAGAACUCACACUGGACUGUGAGAA  
>N734  
UUACCAGUACACAUUUCAAACUGAAAUAGUAAAUUGAAA  
>N735  
CCACCUCUUGAACUAGAGAAACUAUUAGCUAAUAAGAGGCU  
>N736  
CUGAAAACAUUUGUCAGGAAACUCCAACACUGCUGUCACC  
>N737  
CAUGUUGGCAUCCUUGUGAGACUCACGGGCUGUGAUUAGGC  
>N738  
CUUAUGAGCCCCACUCAGGGACUGGGCUCAGAGCUGUCAAC  
>N739  
UUAGAUCUCCUUUAUUGAACUCCAAAGAAAGACCUAGA  
>N740  
CUUAGGUCUCUGAGCACUGAACUGCGAUGUGGCUUUUGACU  
>N741  
AUGUGGUUGCUGGAAAUUGAACUCAAGACCUCUGGAAGAAU  
>N742  
UAUCCCUAUCUACUCCUAAACUGAAGGAGAAAAGCGAAUG  
>N743  
UAAUGCAGGUCUGCAUCCAAACUCACCCUUGGAUAAGGAGA  
>N744  
GAUGGACCUCUAGGUUCUGAACUUUCCUCCUGUGGAUAUAG  
>N745  
AUUUUCCAUAUAAAAGAUAAACUUAUGCCUUGUGUGUCU  
>N746  
GAGAUUUUUUUUAUUCUGGACUGUAAGACCUGAUUUUCUA  
>N747  
UGCUGUCUAAAAGAACAAAACUAAACAAAACAAAACAUC  
>N748  
UACCACUACUCCAGGAGAAACUUUAUAUAAAUAACUAAUU  
>N749  
UCCUCAGAAACAUCUGUGAAACUUCACAGAGGCAGAAGUAG

>N750  
ACUCAAGCUUGCCUAUAGAGACUUAUUUCUCUAGGUGCCUU  
>N751  
UAUGCUGUAAGGUAAAGGGAACUAGGGUAAUCCCAACUUCA  
>N752  
CAAGGGACAACUAAUUUCAACUUCUUAGGGCUGGGAUGGU  
>N753  
GCCUUUGUUAGAACUGCAAAACUAAUCUAGUGCUGAUCAA  
>N754  
AGGCCCCUCCACCUUUGGAGACUAGGAAGGCCGCCAAACAG  
>N755  
CAGUCUGGUCAAUGAAGGGAACUUAGGUCAGAGGAAACCUC  
>N756  
UUAAUUUCUGGGGAGAUAAAACUCUCAUAGCCCUAACUGUC  
>N757  
AUAAUUUUUUCUAUUAAAAACUUUCCCGGAAAUGUGUUCG  
>N758  
CAGCUCUCUGGUCAAAAUAACUGUCCCAAGAAACUUUCCA  
>N759  
UCCGGCUCCAUCACUCCUAGACUGUUCCCCUCCACUGCAAC  
>N760  
UGGAUCAUGAUGGAUGAACUCUGCUGUUUCCUCAGUCC  
>N761  
AGCUCACAGCAAAACAAGGAACUCUGCUUUCAAAAGUUACA  
>N762  
GCAAGUUUUUAUAUCUUUAGACUAAAAACAAAACGUUAGAA  
>N763  
GUAGCCCCAGCUGACCUAGAACUUCUGUCUAUCAACAACU  
>N764  
GCAGCCAAAGCUGGCCUUGAACUCAUGACCCUCCUGCUUCC  
>N765  
UGGCUGGCCAACCAAACUAGACUGUUAAACAGUUUGUCUUU  
>N766  
GACAGAGUCACAGAAUUGGGACUGCCUUUGUCCUCCUGCU  
>N767  
GGUAGGGAGUUCAAGGCCAGACUGGACUACAAGUGAGAAGU  
>N768  
AGUAUAUUGGAAACAAUCAGACUAAUCUUUGAUUAACUGUU  
>N769  
UGAGAUUGAGGUUAGCCUGAACUAUGUAAGAUCCCAUUUGC  
>N770  
UGGAUCUGAGAGACACAGGGACUUAGAGAAGGGAGUGGGCA  
>N771  
UUCAGGUAAGAUGAUCAAGAACUUUACCCACCGAGAUUCAU  
>N772  
GGCCAUUCUCACUCCAAGACUCAUGAAUUUUGCAUUAUU  
>N773  
CUGAAUGCCGAGCAUUGCAGACUCCAUCUCAUUUACUCCCC

>N774  
GGUUCUGUAUAUGACAGAAAACUGUAUUUGCCUUUCUGAGU  
>N775  
AUAUGUGUGUGUGUAUGGGGACUGGGGGAUACAUUUGGACU  
>N776  
UCACCAUGUGGUUGCUGGGAACUAAACCUGGGUCCUCUUAC  
>N777  
UUUGUAGAGGUAAGAGAGAAACUUCUAGAAUUGGCUCUUUC  
>N778  
UAAACAAAGCCCCUGGGAGAACUCGGGCAAACUGAACACCU  
>N779  
UUACUCUAAAAUUCUUCUAAACUGGGCAGUCCUUUUCCAAA  
>N780  
AUUCUGAGGGAGAGAAGGGGACUCCGUGUGUGUGUGUGUGU  
>N781  
CCACACUUUUGAUUCUGAGAACUUCAAACAUGUUAGAGCUA  
>N782  
AUGACAGGCGGUACCACUAGACUAUCUCUUAUUUACUGCUU  
>N783  
UCCUUCAGUGGACCAGACAGACUUCAGUUCCAGCAUCCAG  
>N784  
CUUGAGGAAGCUCCUUGGAGACUUGUUUUCUCCUGCCUUG  
>N785  
GGUGUGUGUGUGUGUUAGGAACUUCUUUUUUUUCUCUUU  
>N786  
UGUUGUUGGAAGGUCAUAAAACUCUUAAGUUAAGGUCUG  
>N787  
GGGAGACUUGAGGGAGGAAACUAAGUAGGGAGGAGAAUGG  
>N788  
ACAUGGCAUUAUAAGAAUAAACUGCACAUGAGAUUUGAUC  
>N789  
GUUCAAGAUUUAAUUGAAAACUUGGCUCGCAUUUCCAGU  
>N790  
GCUCAGGAAAUGUGUCCUAAACUGAACCAUUCUGUUGUCAG  
>N791  
UGAUGGGUCCCUCAGGAAAACUUGACCUCGUUAUUUAUAA  
>N792  
ACAAAGAAAAACCCCAUGAACUCCAUGCAAAGCCUCUGAA  
>N793  
AAGCUCUUUCUACCUGAGGAACUGAAGAACACCGCCAACAA  
>N794  
AGCGUGCUUUAUCUUCUAGAACUUCACAGCACAUGGUUAUAG  
>N795  
CUUCCAUCGGACGCUCAGAACUGAGGGGAGAGAUGCAAGC  
>N796  
GGACUCCAGAUGAGUGAGAGACUUUGACACACACACACA  
>N797  
UUCUUGCAUGUAGUCAAAAAACUCUACCAAUGCAGCCACAC

>N798  
AGCUUUUUGUGCAGUUGCAAACUCGAAUUUUAAGCUCAAAC  
>N799  
AUCUGCACUGAUGCAUAGAGACUGGGGUGCUCUCUGGGAAU  
>N800  
CUCCGUCGGCUGCUAGGUGAACUUACAUCAUUAGGUAAAG  
>N801  
GCUCUGGAGUGCCUCUGGAGACUGUAAACCCCAUGUACAGU  
>N802  
CUCUCUAGCUCACCAUUGAAGACUGGUAACCUUCUAGACCU  
>N803  
GAGAGAGAGAGAACCAAGACUACCUAUUAUCCAAAUUCUA  
>N804  
AGUGUGGGCUGAGUUGUGGGACUAGAGGGGACUAGAUAACG  
>N805  
UCUGGCCCAGAGAAGGCUAAACUUAGUCUUGGCUGCUUGGA  
>N806  
GAGACUGGCUUGUGAGAGAAACUAAAAGAAGUAAACAUGCC  
>N807  
UGAGAGUUGAGAGAGAAGGAACUUUGGUCUGAAAAUUUGAA  
>N808  
ACUGAGAUGGCGGCUCAGAAACUGGAGGGCAAGGAAACAUG  
>N809  
GCCAGAGCAGGCACCUGGGGACUGGAGUUACAGAUGGUUUU  
>N810  
CUAGGUGUAUAAGAAAACAAACUGAGUAAUCCAGGGAGAGC  
>N811  
GUUUUAUCACAGCAGUAGAAACUCUACCUAAGACAGAAAU  
>N812  
CCAGAGACCACAGAGCUGGAACUGAGGUCUAUGUCCGCUCC  
>N813  
AGUGAGAAGGGAUGAGAGGAACUCAUUAUCCUUGGUUCA  
>N814  
AACAGCUGCUUGCUUGGGGAACUUUUUGUUCUCUCCCAGA  
>N815  
UCACCAGAGAACUCAGGAAGACUCCAUCAUGCUGAUCUUUA  
>N816  
CUCAGAUGAGGAUGCCUCAAACUAGCAGAAUCCUUUCUGGU  
>N817  
ACUGGACUCAAUUCACCCAGACUUGUAGACACAAGCAGGUC  
>N818  
ACAUUGAAAUUGCCUUGAAGACUCAAGAUGUAAAGAUGC  
>N819  
CAUUGUUGAGACUGCUAUAGACUAUGAGGACUUUGAACAUU  
>N820  
ACCUCCAAGGUCCCACUGGACUCUCCACAGGAUCUUAGAA  
>N821  
AUGAUCUGAGUGGUUCAAGGACUUGCCUGAAGAGGCAGAGC

>N822  
CCCUCAAGAUUGAUUCUGGGACUCAACCAGCCAUGCAUGUU  
>N823  
CUCAUGAAAAUAAGCCAAGAACUAGGCAUGACUGGGGAAUU  
>N824  
AUGCUUUUGGGAAAACAAAAACUUUGGCUGUUGUUGAUCUA  
>N825  
AAAACUAAGCGGAGACACAGACUCUCACACUCACGGGAAGA  
>N826  
ACUCGGUGCUCAUUGGAAGGACUGUGUGGGAGGGAAUAGGA  
>N827  
UUCUGGAAGAAUAGAGAAGACUUUCUGCUUCAGUAGUUGA  
>N828  
GUGCAGCCACCGUCAGAGGACUUCAAGUAGAAGUAAGUUC  
>N829  
GAUCUGCAGUCUACCUCUGAACUCCUGGCUGCUGCCAUUGG  
>N830  
CAUUCUGUCACUGUUGAGGGACUGAAGUUGGGGACAAACC  
>N831  
GGGCCAUACAGGAGGGGAAAACUUUCUGGCAUGGCCCGGAA  
>N832  
GAGGACACGGGAGGCUCAGGACUGCUUUGGAUCUUAGUUA  
>N833  
GCAGCCAUGAAUGACCUUGAACUUGUCUUUGCCUAGCUUCU  
>N834  
UGUUAAGAAGCCAAUGAAGAACUUGAAUUUCCGAUCAGUGC  
>N835  
GGAGUUUUGUAGCAAUAGAAACUCUAAGACACUGGUUGAGG  
>N836  
GUGAAGUGCUGUGGGGUCAAACUACGGUCCAAGGAUGGUC  
>N837  
AACUUUAGAUUUACAGAGGAACUGUGGUUAGUGCCUGCACA  
>N838  
CCAUAACUCUCGAGGUUCAAACUUUAAAUAUAAGUUGUGGG  
>N839  
CUAAAGCGACAGAGUCACAGACUUUCCAGAGCCCGUAGGAG  
>N840  
CUUUCAGAGCCCGUAGGAGACUGAUGCUCUUCAAAAGCUG  
>N841  
CCCACGUGUGAGUCCUGGGAACUUAGGUCCUUGAGCAGCUG  
>N842  
GAGAGUGUUUUGAAAAUAGGACUAUCACCCAUCUUUGACGC  
>N843  
UGCAGAAGCAGCUAGAAUAGACUAAGCUGAUUUCUACUAAA  
>N844  
AAACCUGAAGUUCUGCUCAGACUACCCACUGGUGUUUGCCA  
>N845  
UUUUCAUUAUCUGUACUAAACUCAUCAAAAUGGUGUUUUG

>N846  
CGUGGAUAUGAUGAGGCAGAAACUCCUGGCCCCACAGCAGGA  
>N847  
CACUUUCUCUUCUGAGAAAGACUGGUUUCUCAGCGUUAAC  
>N848  
AACCCAGAGUUUCAGGUAAACUCUUGCAGGAAUAUCGAUG  
>N849  
CAACAAACAUACAGGAGAGGACUGCUGGGUCUGUGUUCAUU  
>N850  
CUCAGUGUAGUGCCUUUAAGACUGAUCUAUAUUGAUGCAGU  
>N851  
GGAACUUGC UAAAAAGGCAAACUCUCAUCCAUCUCUUAAC  
>N852  
ACUCCCAGUCUUGUGCUAGAACUUUUGAGUAUAUUUGACAC  
>N853  
GUGUGGGGGGACC UUGGGAACUAUGAGCCACAACACGGUA  
>N854  
CAUACUUACACACAAACAGGACUCUACUGUAAAAGCAAAGA  
>N855  
UCUUGAGUUGAAUGCCAGAACUCACAUAUAAAAGCAAGGU  
>N856  
CGCUUUGGUGUAUCACCUGGACUUGGACAUAUCCAGCCUGA  
>N857  
AUCAGGAUCACUGUGGACGGACUGAGAGGUUCUCCAGGCAU  
>N858  
ACACUUGUUUUGCCAAUCAAAACUGUAUGCAAGUUUAUUAAG  
>N859  
UGC UUGCAGCCAACCAUUGGACUGAGUGCGGGGGCUCCCCA  
>N860  
AGAGGUAAGUCAUACUUGAGACUUACAGCCUUCUACUACAU  
>N861  
AUCUGGAUUACACAAAGUGAACUCAGUGUGGACUAAGGCUG  
>N862  
GACCGAU AUGGACCACUGGAACUAGCUAAUCGGUCAUGGUA  
>N863  
UAACGGCCUGUAGCAA AUGGACUAGCUGGAUGGCCAGAGAG  
>N864  
CAGCUAUACCACUCUUGGGAACUACCCAAAGGACACUCCA  
>N865  
AUCUCUUGUAGCCAGGCAAAACUCCCAGAGGAGACUGGG  
>N866  
AUGUAAAGGGCCCUAUAGAGACUGGGAUUUCAUACAGCGUG  
>N867  
UGAUGAAAACUCAGGACAGAACUCACAAACAAAUCAUGC  
>N868  
AUAGGCCAAAACCUUGGCCAAACUUAUAGCUCCACAAUGAGG  
>N869  
CAUUCAUACCAAGCGUCAGAACUUCUGGCAGUGAGGUUAG



>N870  
UAGGCUGUUCAGCCAAGUGAAACUCCAGGGACCUACCAAUCU  
>N871  
AAAUGGGAAGGAAAGAAAAAACUGUCUCAGGUAGGAAAUGG  
>N872  
UGUGCCUGUAAGCUAACCAGACUUCCUACAUGGUCUGCCUA  
>N873  
UCCCUUGGGAUCCACCAGAACUUGAAGGUAAGACCUCGUU  
>N874  
AAUUCUGUGUGUAUAAACAGACUUCUCAGGCAAGGCAGAC  
>N875  
CAACUCCAAAGUCCAUAGACUAUAUAUAAAAAACAAAAC  
>N876  
AUGGUGCCAACUUGCAGGAGACUACCACCCAGUGGAUUAU  
>N877  
CUUCAAUGUUCUAUCUUGGACUCUAUUUGUCUGAGAAGCC  
>N878  
GUAUUUUUAAAGAAGCCAAAACUCUUACUACAAUCAUGUAA  
>N879  
UCCAAACAGGGCAGUGAGAACUGCUAACUGUCCUGUCUA  
>N880  
UGGGAUGGUACUUUCAGAAAACUGUGACCAUGUUCAUUUGG  
>N881  
ACUCAUAACAACAACAAAACUGAGAUGC GCCGUGCAGUG  
>N882  
GGCUAAUAUCCUUUCGGAAACUAGCCUUGGGAUCAGGUUU  
>N883  
CAUUAGACAUUAGAAAUGAACUGACCCUAGAAUUAGCGC  
>N884  
UGGAGAGGGCCGCAUGGAAGACUGAUCAGCUUCUGUACCUA  
>N885  
CUAACAGUUCAGGAAGAUGGACUAAGUUCUAUUCUUAU  
>N886  
GCAUUUCUUCUACAUUGGAACUUGCUGUAAGACCAAGAGA  
>N887  
CAAAGAAAACGCAUGGUGGAACUUGUGGCUCUGCCUAUUA  
>N888  
GUUCUAUAAGACUUUACGAAACUCUUUCCAUGUUGGCACAC  
>N889  
ACACCUAUAUAUUUGAAAAACUCCUUGAAGACAAAUAAGA  
>N890  
UCCAUUUGCUGUAAAGAAAGACUUUUCUCCUCCUCCAA  
>N891  
UUGCAGGGUGUUGGAAUAGACUUGGGGGUCCAUGGGUUAG  
>N892  
UGUUCUCCCAUCAUGAUGGACUGCACGCUCAACCCCAA  
>N893  
AGAAUGUCAGAUSCCCUGAGACUGGAGUUACAGAUGGUUGU

>N894  
UCACAUAAAAUAGGUUCUGAACUUCAGGGUAACAUUUAAAA  
>N895  
AUAUAUAUAAGAGUUUUAGACUGACUCUUGGAAAGCAUGG  
>N896  
GUAUCAUCUUUAGAAUUGAACUUAGCAAAAAGUUUAGUAG  
>N897  
AUCCUAACCUUGCACAAAAAACUUAAAAAUUAUGGUUAAAA  
>N898  
AUACUAAUAUACCCAGCAAAACUAUCUGUCAUAAAUCAAGU  
>N899  
AAGAAGAUUAAAGUAGAUAAACUACCCUGAGAACUCUCCAG  
>N900  
AUGACCAAGCAUGGUACAGAACUCCUGAGGACACUUCUGAG  
>N901  
UCUAGACUAUACCCAGCAAAACUACUAAUUGUAAUAGAUGG  
>N902  
CAGAAGGUGUUAACAGAAAAACUUUAACUUGGAAAGGUUAG  
>N903  
GUAUUGAGCCACAAAAUUGAACUCAUGACAAAUUCACCUG  
>N904  
AAGAGGGAAUAGGUGGGAAGACUGCAAGAGCCAGAGGACAC  
>N905  
CAGAGGAAUUGCAAUAGGAGACUGUUUUAAGUCCUAUCUU  
>N906  
CAGGCACAAUCACCUGCCAGACUGGAGCAGACAAGCAAACG  
>N907  
GCUGUGGACUCAGCCUCUGAACUGUAGGCUAGCUCUCAGUU  
>N908  
UUGGUCUGUAUCAUAACCAGACUGCCGCUUUGGCAGCAUCA  
>N909  
CUGUGUGACAAAUUUCACAGACUGAGGUGAUAGACCUCAAC  
>N910  
UACUUGCUCUUUAGCCAGAACUUAUAAAUGCAAGCCACU  
>N911  
GUUGCCAAGCCAGUGGAGAGACUCAGUUAUGAGUGGAUGGA  
>N912  
GCUUUGGGGAGAGGACAGGAACUGCUUCAUUGAUUUUAUUUA  
>N913  
GGUACCCAGUGUAUGCACAAACUUGAUUGGAUGCCCUCACC  
>N914  
UUAGAGGAUAAAGGAGAGAGACUCAUUUUGGUCCAGAACCA  
>N915  
CAGAAGGGAAAAAGUCCAAACUCAGGCAACAGAAUGAGAA  
>N916  
CAAAGUAAGUUGUAAGUCAAACUGUUAGAAUCCUAUGUGAA  
>N917  
CUGUUAGAAUCCUAUGUGAAACUUUCAUAGAUUAGUGUAUG



>N942  
GAGGCAGGAGAGUCACUGGGACUUGCUGUCUGCCAGCCCAG  
>N943  
ACAAGGUUCUAAUUCAGUAGACUUCAGAGCAAAGAAAGGAA  
>N944  
AGUUACUGCACCUUCAUUAGACUCCUUUCUUUUUCCCUC  
>N945  
GCCAGUGAAUCAAUUCCAGACUUGAGACAGUUUGCAGAU  
>N946  
AAUUACUGCCACUAUCAAGGACUUGAAAGACGCAGGGGUGG  
>N947  
GGAAGUAGCAACCACUUUGGACUCAUUGGUAACACAUAUGC  
>N948  
UAUCUAUCAUACUGCACAAGACUCAAGUCCAAGUGGAUCAA  
>N949  
AACAGAGGGAGAGGAGAAGAACUUCUGGGUCCACCCCUUGG  
>N950  
CAUACCAACAAAAACCACAGACUUUUGAAUAGUCUAGUUUC  
>N951  
AUCUCCUGUAGCCAGGCAAGACUUCCAAUGGACAGAUUGGA  
>N952  
AUCCAGAACUGCAUAGCGAGACUCUGUCUUUAAAUAAGU  
>N953  
UUUGCAGGCAAAUAGAUGGAACUAGAAAUAUUAUCCUGCA  
>N954  
GAGAAUGUCCUUUCCAAGGGACUCCAUUGGACUAAACCUCU  
>N955  
AUGUUUCAUUCUCAGGGGAAACUGCUACAUAACAAGGAAG  
>N956  
ACUGUUUUCUUAUCUAGAAAACUCCAGGACAUCUCCGAGUU  
>N957  
UUUUGUCCUGACAGUUUGGACUUUCAUAUGGUCUUCACAU  
>N958  
AUUUUUAUUGGAGAGGAAAGACUUUAUUUCAUCUUAUAUCU  
>N959  
CACAUCAAAGUGACACAAGAACUAUUUACAUAAGCCAACAGG  
>N960  
UUAAGAUUCUUAUCUGUAGGACUUCACAUAACAGGUCAA  
>N961  
AAUUGAACUCAGGUUAUCAGACUUGGCAGCAAUGUCUUUA  
>N962  
AGUAAAAGCCAGUGACCCAAACUUACUGUAACAUUGUAUUA  
>N963  
ACUCAAAUACUGUUUCCAAACUCCUACUUCUUUAUUUGUU  
>N964  
GGGAGAUUCCUGUUGGUGAAACUAUAAGUAUACAUUUGAAA  
>N965  
AUGGUGUGUAUGAUGGCUAGACUUGAGGCUGGAUCGUUGUA

>N966  
AGGACUGAUGGAAACUGAGAACUUUCAUUUAUAAUAUCUGUA  
>N967  
UAAUCAGGCAUUUAUCCAUAAGACUGACUACUGGCCAAGAGUA  
>N968  
GGACGAUGAUGGCACCAAGGACUUAGCCAUUCAAAAAAAAAA  
>N969  
UGCAUUCAUAGGCCUUCUAGACUGUUGCUGUCAUCUGUGGU  
>N970  
AUAGAAUUUAGCUAAAGGAGACUUGAUUUUUACUAGCCCGU  
>N971  
AAUCUUGCUIUUUCUUGAGAACUUGGAAUUCUAGCAAAAA  
>N972  
AAUAGUGGUUUUAACCUGAACUCGGCCGCACUAGCAUGGA  
>N973  
UUGAGCUUGUGGGAGCACAGACUGGGAACUGAUGAGAGCCU  
>N974  
CUUGACUCUCUCGCCAAUGGACUCAUCUACUUGUUAAAGGG  
>N975  
GCUAACCAGACCCCGAAAGACUAACAUGGUGUAGACUCAC  
>N976  
ACCAGGCAGCUUCCUAUGGGACUGGAACACAAAUCCACUCA  
>N977  
AUUCAUCCAAACUUUAAAAACUAAAGCAGCUGAAAAUACU  
>N978  
UGUCCAUAAGCAUUCAAGAGACUGGAAAAAUGGAUAGCACA  
>N979  
AUGAAAUAUCAAAACUCAGGACUGAAAUCAACCAAGUAGAA  
>N980  
GCCACAAUUCCAAUUUGAAACUGUGAGAGUUUGAAAAUGAA  
>N981  
AGUUUUGAUUUUGGUUCAAAACUUUCCAUUUUCUUUGAAC  
>N982  
AGUUAGAAGAUAAUACACAGACUGCAUAGGGAGAGAGGAAU  
>N983  
AGACACCAAUAAUGUAUAGACUCAUGACAUUUUUCAAG  
>N984  
CUUCUCUUGUACUGCUAAGACUUUGAGCAGUUUACUGAAC  
>N985  
ACUAUGGAGCUUGGCUUGGAACUAACAAUCCCCAGCCUCA  
>N986  
AAGCUUUAACAUGUACCAAACUACUUUCCUCCUAGCAAUG  
>N987  
AAGUAAAAUUAUAGAUUAAACUGAAGUUGGGGACCCCUAU  
>N988  
GGCUCUCUCUUGGUCUUAAGACUGCAUAGAGCUGUGGGUUAU  
>N989  
UGGGUGGGUCAUCAUAGAAAACUCAGACUGUCACUGCUGAU

>N990  
GUUUGAUUCAUUGCUAGUGAACUAUUCCCCCAAAUCAGGGA  
>N991  
UUCUUCUGUGUCCUGUGUAGACUGCCACCAGAAGUUGUGGC  
>N992  
CAGAAGAGAAGCUACCAUAGACUUGAUGUUGAUCCAAAGCA  
>N993  
UCAGACAUCCAGCCUCAUAAACUGAACAACUACUAGAUUUA  
>N994  
AAAUUCAAAAGUAGCAACAGAACUUGGAAAACUAUAGCAAAG  
>N995  
UUCGAGUCGGGGGAAGUAGGACUCCUUCACUCCUUGCUUCA  
>N996  
UAACUGCUGGUGGAACUAGAACUGGGGAGGUAGAGGAUUGU  
>N997  
AAACAUCAAUGUCCAUAAGAACUGACACACAGGUGUGUAUA  
>N998  
CAGACUGAAGUGCCAGGUAAACUGGAGACUGCUGUCCACCC  
>N999  
UCAGGUGCCUACAGCAUUAACUCUCAGAGACAGAAAGCAG  
>N1000  
AGGUGGGGUGGGGGAUGGGGACUUC CACAUGAAGACAGGUG  
>N1001  
AGCUAAUGGAGACUAUGUAGACUAUGUGGCCAUUUGCUC C  
>N1002  
UUCUCUAAAAGGCACAAGAAACUGACAGUCUGGACACACAC  
>N1003  
GCAGGAGAUGUGGAGCAGGGACUGCACAUAUUAUAAUGGGAA  
>N1004  
AGCAAUGGUCUAGAAUGUGAACUCUGGCAUCACCCAAAUUC  
>N1005  
UGUUUUCUUGAAAGAUUCGAACUUUUAGAAAGUCUGGAUAC  
>N1006  
UCUGCCUCCCAAGGGCUAGGACUGAAUGUGUGCACCACCAC  
>N1007  
AAGAAGUCUAAGUGCAUAAAACUUUGUGAUAAAUGUGUUCA  
>N1008  
CUUAUAAUUAAGGAUGUGAACUCUCAGCUUACAGCUCCAG  
>N1009  
AGGAAAGGAUGGAAGAUAAAACUAACCUUGGUCUUGCAAUU  
>N1010  
GACAUAAAGAAUCGUAGCAAACUGCUACUCUUCUGGAAUGG  
>N1011  
CAAAAUGACAGCAAACCUAGACUAGCAAAACUAUCUACCAU  
>N1012  
UAGAAAUGUUUAUAUAUCUAGACUGGAGCUUUGUACACUGUA  
>N1013  
CCUGGCUCUCUAGGUUUCAGACUGGAAUAAGGACUUGCUC A

>N1014  
UUUUCUCUGCCCUGCAAGGACUGGGAUUGCACACACUACU  
>N1015  
UGUCUAACAUGUAUGUCAAAAACUUUUUAAAUGGUACACAUU  
>N1016  
CUGUCAUGAAAAUAUGUUGGACUUAGUCAAAUGCUUUUUCU  
>N1017  
UUGCAAGUACUUUGUUGAAAACUUUGCCUCUAUGACCAUUA  
>N1018  
GACACCAUUUUGACCUUAGAACUCAGUACAUAGGCAACAAC  
>N1019  
GUGCAACGUUCAAGCUAGAACUUUGAAGUGUGGGGACCCU  
>N1020  
UUUGAGUUGUUGUUUUUGAGACUGGGUCGUGAUGUGUAGUC  
>N1021  
CCAGAGGUCAGUCAACAUGAACUUAGUGAAAUCAUCAGUU  
>N1022  
UAAAUGAACACCUCUGGAAACUCUCUCAAGGCACACACA  
>N1023  
UAUCCAUGUAAAUUAGCUGGACUUUCCUGGGAAGGAGUGCU  
>N1024  
GAGCUCAUCUCUCAUGGUGAACUUGAUGGCCCUUGGCAGAA  
>N1025  
AUACUGAACAGCCACAAUGAACUGGUGUCGGGAUCGUGGCU  
>N1026  
GGAGCAAUUCUGGGUCAAAAACUUUGAAGAUAGUUGGAUGG  
>N1027  
AAACAUUACAUCUCUUAGAAACUGUAUUCAGUGAAACAUC  
>N1028  
CACAUUCAUGGCUUCUUGGGACUUGGUUGAGAGAGAGAGAG  
>N1029  
AUAAACAGGAUGAGAAAGAAACUAGGAAAACAUCCCUUC  
>N1030  
ACUAUGGGAUAAAUAACAAGACUCAGGAGGAGGUAGAGAGG  
>N1031  
AGGGACUGGUUCCUGGAAGAACUUUUAGCUAGUUUUUGAGC  
>N1032  
AUAUAGGGAAAGCCCACCGAACUCAUCCUUUGUUUCAGCUG  
>N1033  
CCCCUGAGGGCCUAUAAAAACUGGGACCUCUUUCCCCUCG  
>N1034  
CCAAUGCAACAGGAUCUGAAACUAAGGCUUCUCCUAUCAA  
>N1035  
AUUAAAAGUAUCAUUUACAGACUGAGAAACAUUCAGUACUG  
>N1036  
UCCAAGUAGAAUCAUAUGGACUACUCCUCAAAUAUGGCA  
>N1037  
UAGCCAUGCCCUGAGGAAGAACUUUCCAUGAUUUCUUUC

>N1038  
AGGUCCAGAAAAUCCAAGAAACUUUCCGAGGAGGAAUUUGG  
>N1039  
AUUAAGCAUGUUGUAGCAAACUAAGAUUACCUUAGUUAAG  
>N1040  
GCAAGUGCCAGGACAGCCAAACUUAGGCAAUGAAGGAAUCA  
>N1041  
GUUUUCUCAUCAUAGCCAAGACUUUUCACCAGAGCAGAACA  
>N1042  
CUGUCAUUUCGUGUUGUUGAACUCGGUUCAUCCGGCUUUGC  
>N1043  
UAUGCAGUCCUCAACUAAAAACUAAAGAGGAAAAAAAAUUA  
>N1044  
CAGGCUUGAAUUGGUUCAGAACUUCUACAUUAGUCUACUAC  
>N1045  
AAGGAAGUGAGGUCACAUAGACUUGUUGAAGUGCUCUUGAG  
>N1046  
UGCUGCAGAGCUGAGAUGAAACUAGUGGGUAAUUUCAUUGG  
>N1047  
CUUACAAAUUUAUUUGAAAGACUCCAGAGAGGUCAAGGGCC  
>N1048  
CCAGCGAGUCCUGUCACUGGACUCCAGACUGUCUAAGGCCA  
>N1049  
UUCUCUGAGAUSCCUCAAAAGACUUCAGGGUGUUUUUUUGUU  
>N1050  
CUACACAACGGUUUAAAAGAACUACAAGCAUGAAAUGCUUU  
>N1051  
GUAGCCUUGGCUGUCUUGGAACUAUGUCAGAUCUACAUCU  
>N1052  
AAUUCUUGUGAGCUACUCAGACUUCAGUCUAGCUUGGAGUA  
>N1053  
ACACUCCAAGCAUCAAAUAAACUAUUUCAUAGAGUACAGUG  
>N1054  
GUGAGUGAAUUGC UAAUAAAACUUUUCAGAACAUCACACA  
>N1055  
GAGAGAUGAUGGAUAUUGAAACUAAACACAGAGUGAAACUA  
>N1056  
AUAUUCAAAAUGAGCUAUAGACUUAAGGGGAUCCUUGUCA  
>N1057  
CUCUAGCCCCUCAAAUGAGAACUUUAAAACCAUGGAUGUGG  
>N1058  
CCUGCUGUGCGUGGAUGAGAACUGAGAGUAUAAAAGAGUGA  
>N1059  
GGGUGGGGGAACUAGGGAAAACUGUGUUUGGGCUGUAAUGU  
>N1060  
UGGGCAUAAAACAGGAUAAACUGUUCAGUAACUGUGGUGG  
>N1061  
AAACUAAUUAGAUGAAAGAAACUCAAAAGUUGUUUAGAAUU



>N1062  
UUCUCUUCCUCAUCAUGUAGACUCCAAAAAUUCAGUUGCAC  
>N1063  
UAUGUCAGACAAUUAUAUAAAACUUUCUGUACCUCAAGAUUU  
>N1064  
AAUACUGGCCAGGUUGAUGGACUGGCCAACUCCAUCUCCAG  
>N1065  
CAUCCUAACUAAGACUGUAGACUACAUCUGGAUCUCAGAAA  
>N1066  
UUCUGGGAGUUCUUAUAAGAACUAUGGAGUGUUUUGUUUUC  
>N1067  
CUGCACAUUUCACUGUAGAAAACUGAUUAGUUUUGUAAAACU  
>N1068  
GUUAUAGUCCAUCAUUAUAGACUUGCAGCGGUAGGAAAUAC  
>N1069  
CAAAUUGACAGCAAUAAGACUCUACUAAGGGCAUAAACU  
>N1070  
AUAGGAAAAGAAGAAGCCAAACUAUUCUAUUUUUAGAUGA  
>N1071  
UCCAGAUAGCCAAAAUAAAACUCAACAACAAAAGACAAGC  
>N1072  
AAUGAGUCAAAAGUGCUGAGACUAUGUGAUUAUGAGAGGUC  
>N1073  
UAUUUCAUAAAUCUGUAAAAACUCACCGUGCAAACACCAGC  
>N1074  
AAAGAUGAGUUAAUAAAGAAACUAAAAAAGACAUACAGGAU  
>N1075  
CAACUCAGGCUAUUGCCAAGACUAUAGUUUGCUCUCCACAA  
>N1076  
CUAUAGUUUGCUCUCCACAAACUGACAAUAAGGUCUCAUUA  
>N1077  
AUAAAUGACAUGAUGUCAGGACUGUUGUAGGGUCCUGGAGG  
>N1078  
AGGGACAUAGAAAUGAGGAAACUGAGUAUCCCCUCAUAGAC  
>N1079  
CUCUCUCAGUCUAAACCCAAACUGUGCACUGCAUCAUGACA  
>N1080  
CUUAACCAGGCAACUGGUGAACUUCUGGAAUGAAAUGCAAC  
>N1081  
AAUCUUCAGCUUAAGGAAAACUUCAUGCAGUUUGUUAAGA  
>N1082  
ACUCAUAGGGAGUGGAGAAAACUCUCCAUAAGAAAAGACCU  
>N1083  
UUAUUUCUAAAAACAAUCAAAACUAAAAACAAAGCAAAGAA  
>N1084  
UCCUCACCUUAAAGGUACAGACUGUUGCAGGAAAUUUUAA  
>N1085  
ACCGUGCUCUGGAUGUUGAAACUUAUAUUUUGUAUGUAUUAU

>N1086  
UCUCUGUGUGUACUCACUGGACUCCGUUGCUCGUUCAUCA  
>N1087  
GAGCCUAUGGGGAACUCAAAAACUGCUUUAAGAAUAAAGAC  
>N1088  
AUUGCCAACUGUUUAGGAGAACUAGAAGUACAAGCUAGUUG  
>N1089  
GCUGACAGCAUGCUGUCCAGACUGUGGACAAGCAGGACACU  
>N1090  
AGGUCUCUGAUGCAUUGAAGACUAGAAAGCUAGAGUCUAC  
>N1091  
CUCAUGAUUCCAGGUUCCAGACUUUUGCUGAGGGGACAUCA  
>N1092  
UGCUCAUGUGC UUUGUCUAAAACUUUCAGUUGUUUCAAGAAA  
>N1093  
UCCAGUCAGUAUUCAGGAAACUGAAUCAGAAGGGUCACAA  
>N1094  
UAGAUAAUGAUUUGAACAAAACUUUCCCUUUUUUUGGUCAU  
>N1095  
CAAAGUAAGAGAAUCCUCAAAACUGUUGCAGUUGUAAGAUGA  
>N1096  
GUACUCACAGGGUUUCCAAAACUCACCCCACCGCCCCACCC  
>N1097  
CUCCCCUCCAGAAGGGAGGGACUAAUACA UCCAAGACCA  
>N1098  
GGAAGAAA UAGAUUUGGGGACUUUGGAUUUGUAAAGCAGU  
>N1099  
GUUGCUGUU AUUUAGAUAGAACUUAGGGAAAUGUGCAGUUU  
>N1100  
UGGGGGGGGGGGGACUGAAAACUGUUGCUGGGGAAGUCUGG  
>N1101  
AUUUAGGCCUAGUCUCCUGAACUGCCAAUUUGAAGCCUGUC  
>N1102  
UUUUGCUAUCUGGUUUGGAAACUCAGCAGCUGGGCUUCAUG  
>N1103  
CUAGCUAUAGACUCUAAUAAAACUAAAUGAACAAUUUCCUU  
>N1104  
UUAGGUUAUCGUUAAA UAGACUAUCAUGAUGAGAGCCUUG  
>N1105  
CUGAAUAGAGGAAGUUCAGAACUAAUCUUAUCUUUCUCCUC  
>N1106  
ACACGUUAUUUGUAAAAGGAAACUGCACUGUUACACAUCAAA  
>N1107  
AAAACUCUGUAGGCUAUAAAACUGACAAUCCUUGAGCUCUG  
>N1108  
AUUCUGAGCACUUAUCGAAACUCCAAAUUAUUUAACCUGG  
>N1109  
ACCAGUCACCCAAAUACAAAACUUUGUAGGCAUCGCUGAUU

>N1110  
GCCUCCUCUAAGAACUAGAGACUUGAUACCCUCUCCUCCU  
>N1111  
GCUGUGGGUGUCUCUGUAAGACUCGACAAACGACACCAACU  
>N1112  
UAGACAUUUGAUCCCCUGGAACUAGAGUUACAGGCAGUUGU  
>N1113  
GUUUGUGUAUAUGAUGGGGGACUACAGGCUCUGGCUGUCAC  
>N1114  
GGGACCCAGGCUUGGGAAGGACUCUAGGCUUGAUGUCAUUU  
>N1115  
AUGCAGUUUCUUCUCUUUAGACUGGAGCAGGAGCAGGGCAA  
>N1116  
AGUGUUCAGAGGAAGGCAGGACUCUAAAGGGAACAUGGGUU  
>N1117  
CGAUGUCAUAGAUGGGGAAGACUCUGUGUGGACGAAGACAG  
>N1118  
AAUAGACAUCUAAUCCAAAGACUUUAGUUACCACAAGCAGU  
>N1119  
UACUUACAGCUCAGAGGGAAACUCAAGACCAUCAUCUAAA  
>N1120  
CUAAGAAAAGUACCCAGAAAACUGUCAUUGCCCUGUUAGUG  
>N1121  
AGAGCCUCUGAGAGAAAAGAACUCAGCCAGAUCUAUGUCAU  
>N1122  
AAGAGACUUUCCAUAACUAAGACUUUCUGCUUGAGUUAGUGG  
>N1123  
UUUCUGUCUCCUGUCUCAAACUAACCCCCACAAAGGUGAG  
>N1124  
AAAACAAUUUUUAGCAUCAGACUAUUUUCACACAUUUUAAA  
>N1125  
CUAUUUUCACACAUUUUAAAACUGUGGUCAGGCUAAUAUUC  
>N1126  
UGUUGCCUGUGGCAUCUGGAACUCAGGAAGAAUAGAGCUAU  
>N1127  
AUAGAUAGAUAAAAUUUAAAACUGAGAGAAAAUUUGCUUCC  
>N1128  
GUAGUCCUGGUCCCCGGGAAACUCUUUAGAAGGAAGAUGGA  
>N1129  
CCACUCCUAGGCACCUGAAACUUUUGAAGGACACCUCAUA  
>N1130  
CCUAGGGUCUGGGGGCUUGAACUCCAGAGAAAAGCUUCCUG  
>N1131  
CAAGAAGCAUAUAACAUUAGACUCUACUCCCAUUAGAAGG  
>N1132  
UGAUCCCUUCUAAUUCUGGGACUCUGUAAGUAGCUAACGCC  
>N1133  
UCUUGCCUUGAUCUUUGCAAACUCGUUCUGUUUGAAACACC

>N1134  
AUAGACUAGACUGGCUUUGAACUCACAAAGAUUCACUGGCC  
>N1135  
UUGAAAAUGCUUGCUGUGAGACUUAACAGACAACAAAGUCU  
>N1136  
UUUUUCACAGGUCUCUCCGGACUCUGCCUGAUGUUUGGCAG  
>N1137  
CCCUACAGCUGACUUGAGAACUGGAGAAUAUACUUCAAGU  
>N1138  
UUGAAUAAACUUUCUGGAAAACUUUUCUGUUGCACAAGCUU  
>N1139  
CUCUGAACCAAACUAGGUGGACUUACGAAGCUAGCAGCAUA  
>N1140  
UAGAUUACACAAUGCUUAAAACUGUAGCCUCAAGGAGCACU  
>N1141  
UGAGUGCAAGGCCAGCCUGGACUGCAGAGUUAGUCCAGGU  
>N1142  
CUAAAUUUAGAACAAGGAAACUUCAAUUCUAUUUGAAAGA  
>N1143  
AUAAUUUUAACAUAUCAUGAACUGAACCAUUCUAUCUCAUA  
>N1144  
GUAUACUUGUGGGCAUGAAACUGGGCAAUCUCUAUCUUGU  
>N1145  
CUCGAUAGGCACUUAAGGAAACUUGCUAUUCAGUGAUCUC  
>N1146  
CCAGCUGGGCUACAUCCAGACUCCACAUAUAUCCUUAUCU  
>N1147  
UCUCUCCUGAAGCACCUUAAACUGCAGGUGUUCUAUUUCAG  
>N1148  
UCUAGGUUUGCUCUGAGGAACUAGUAAUAGUCACUAGCUC  
>N1149  
CUGGGUAAAGUUGACACAAAACUAGCCAGUACAACCACCAU  
>N1150  
AUGUUAAAACAAGCCACAAAACUUUGCUCUUGUCUCCAGA  
>N1151  
GAUGAACCAAGGAGCUCUGAACUAUAAUAAACCAUGGUAAC  
>N1152  
AAAGCACCAAUUCUCCCAAACUAUUUCCUAAAAUUGAAAG  
>N1153  
AUAUGCAGAAUAUACUGUGAACUGAAAUUCUAGAUUAAAA  
>N1154  
UAUUCUUUCCGGAUCCCGAGACUCUUAGGCCGUCCUCGGAU  
>N1155  
ACAUCUCCUGCAGUGGCAGACUCCCAUAUCUCCAAGAGAU  
>N1156  
UUCGUCUCCUGGAUGAAGAACUACCUCUCAAUAUGCUU  
>N1157  
UAAUAGUCAAUAGAAAUGAACUAAACGAACAAGAUGGUUU

>N1158  
UUAUUGAACAAAACUGGGAAACUCAAAUGUUCAUAUCCUCU  
>N1159  
UAAUCAGAUCUUUGGAGAGAACUGGGUUGAAGAAUGGAGCU  
>N1160  
CAAAAGUCCUCCAUUCCAAACUGUAGUCUUUCGACCUCCA  
>N1161  
GAUUUUGGACUAGGGACCAGACUGAAGGGUGGAGGUAAUGU  
>N1162  
UCAUCCUGUUACAAAUA AAAACUCAUUGUUAAAAGUAAAAA  
>N1163  
AGAUGCCCUGGCUGACUUGAACUGUGUAGCCUGGGCAGGCU  
>N1164  
GGCCAGGAACACCAUCUGAAACUGACCCAGUUCUAGAGGAA  
>N1165  
AUGUGGAUGCUAGGAAUGAGACUUGGCUCUUUAUGCUCGAA  
>N1166  
ACCAUUACAGAGUGAGCUGAACUGUCAUUUUAUAAGGUGCA  
>N1167  
CUGUCUGUGGCCAGUCAGGAACUCAUGGUGACAUGAGAACU  
>N1168  
UAAAUGUCCAAUUCAGAAACUGAGUCUUAUACCAUAUGA  
>N1169  
AUUCUCACUGUACAGUUAGACUGUUCUGGGACUCACUAUG  
>N1170  
GCGAAUUCUAAAGCAGGAGGACUUGGAUGUUCAAGGCCAGU  
>N1171  
CCAUGUAGUGAAGGAAGAGAACUGGCUCUGGUAAGUUGCUU  
>N1172  
GCCCCUCUGUGGAAGGCCAGACUCCCAGGUGUUCACCCUGU  
>N1173  
AGACGUUUGGUUUCAGGCAAACUUCUUAUCCCCCUUCUCU  
>N1174  
CUUUGUGUAACUGACUUCAAACUUCAGAAGGGAGAGCCAUA  
>N1175  
UCCACAUGUGGAAGGAUAGAACUGACGGAGUCUCCUGAUCU  
>N1176  
GGUAACAUUAUACAGAUUGAACUGGCGUAUUUAUGUAUUUA  
>N1177  
UCCUCCCCAAGCAAAGCCAGACUGCAUGUGGGAGUCCCACC  
>N1178  
AAGUGGGGUUUGGACUGAAGACUUCAGCUGGGCCAGUAAGC  
>N1179  
UGGAUAUGAGCCUGAUGCAGACUUGACACCAGGCUGGAUGC  
>N1180  
CAUUUCCAGGUAGGUUGUAAACUCCUGAGGGGAGGGACUUC  
>N1181  
CGUUCUGUCAAUCCCACGGGACUCCAGGAUCUGAACCCUGA

>N1182  
CUCUGUCUCCACCUCUCCAGAAACUUCGGUUACAGGCAGAGAG  
>N1183  
AGUUUUGUUUUAGGCUAAGAACUUAAAAGAAGAAUGACCAU  
>N1184  
AAAAAACAAAAACAAAAAACUUGCACGAAAAAUUAUAGA  
>N1185  
AGCCACUUGGGAUUAUCUAGACUGCUACUCUAUAGUCUACU  
>N1186  
UACCCCAAUAAAACUAUUAAACUGGCUUUAAAACGUUUUA  
>N1187  
AAGAAAGAAUGGCUUUCAGAACUUUAAAUUUCAGAUGAACU  
>N1188  
GGCAGAACGGUAGCCUUCAGACUGGGAUUUUAACCCGGGUA  
>N1189  
UGGACUUGUGUCCUCUGGAACUAUACGUUGCAAUAAACAU  
>N1190  
UGAAGGAAGUCAGGACAGGAACUCAAACAGGGCAGGAACCU  
>N1191  
UUGCAUCAAGUUGGCAUAAAACUAUCUAGCACAGUCUCUUA  
>N1192  
GGAGGCGAGGACUUGGAAGGACUGGGAAGGGGAAGAAUUAU  
>N1193  
GCUGUUGAGACUGUCAUUAAACUUUAUGGACCAUAAGCCCC  
>N1194  
GUGAGACCCCAUUGGAGAAGACUAAGUUUUUCUUUCCCAGC  
>N1195  
GAUAGUGCCACAAGGGAUAAACUUGUGCAUGUGUUUUUA  
>N1196  
AAAUUUAGAAAUUGCUIAAAACUAGGGAAGGUUGAAGGUGU  
>N1197  
UCUGCUGUAAACAAGAACAGACUCUAUAGCCUUCUCAUCAC  
>N1198  
ACCAGUGUCCUACCACAGGGACUGAGACGAGGAAUCCUACC  
>N1199  
UUAGUACAAAUCCUUUAUGAACUUACUUUGUGGCUAUGUAA  
>N1200  
ACCUGAUUUAUUUCUUUUAAACUCUAAUGGAAUUGUCUUCA  
>N1201  
GUGGGUAGCAGGCAGUAAGGACUUAAAAGAGAAAAGAAAGAA  
>N1202  
UAGAUUCCUGUCUCUCUGAAACUGGAGGCCCAAUAAACC  
>N1203  
CUGACUUCCCUGUAUGCUGGACUGUAACCUUUAAACUGAAA  
>N1204  
ACUAACGGGGUGCCACAAAAACUGCUGCAGAGAAUUUUAUC  
>N1205  
UAGUGACCUGUGUCUCUCAGACUAGGCUACGCCUGUGGAC

>N1206  
UGAUAUGCUGGUCUUUUCAGACUUGUUAAGAUGAAGCGCUG  
>N1207  
UCAUCCAUCUGCAUUUUGGACUGGCUGAUACCUGGAUACCU  
>N1208  
AAAUGAUGGAGAUUAUGAAGACUUGUUUAAUUUAUAAAUAU  
>N1209  
UGCAACGAAAGUUUGAACAAACUUAAGAUUUUACUGUGAUG  
>N1210  
GACUAUUCAUAACUAACUAGACUAUCAUUUGCUCUACCAUA  
>N1211  
AUUACCAAGUGAGAGGGUAGACUAUAUAGGGCUUACAUAUU  
>N1212  
UUUAUGUUCUUGUGGCUUAAACUUAUAUAAUUAUUUGAUAU  
>N1213  
GCUUAAUAUUUCCUAGUUAGACUCUGGUACUGUAAGAAUAG  
>N1214  
UACUGUGCAGCUCUAUUGAACUCAGAUUCUGGGAUUUUAG  
>N1215  
UGGUGAUUUAGUCCCUGGGAACUCUGGUUGAUUGAUUUGU  
>N1216  
AUUAAAUUUCUGACUUGUGAACUACAAAACAGAGUACCAUG  
>N1217  
CUGCUGAGCUUGACUCCAAGACUGGGGAUGGUGUGUUUUG  
>N1218  
ACUGCAUGGAGUAAAUAGAACUUACACAAAAAUGUUGCAA  
>N1219  
ACAGAAGAUGACCAGUUCAGACUCUGUAUCCUCCAAGCCUA  
>N1220  
ACGUGCUUUUGUGAUAGGAAACUUCACAGUGUGGCUUCUCC  
>N1221  
GUGGCCGAAGAGCCAUGAGGACUGCCUAGAAGCCUGCAGGC  
>N1222  
AUGAAACAUAACUACCACAAACUCAAAAGAUCUUGUGUGGG  
>N1223  
GCAAUUUUUAUGCUGUGGGGACUAAAAGGUGCACUAUCUCU  
>N1224  
GGAUAUCUAAACUUGAAAAACUUAUUUAUUAUCAAUAUCU  
>N1225  
GAAAGUUGAAUAGUUGUAAGACUUUCAGGCUUAUUCUUACA  
>N1226  
GUAUGCACAUCUGCACAUAAACUCCUGAGAGUAAACAAUAA  
>N1227  
UUCUCCCACCAGGCAGUUAGACUAGGGGGAGGGGAUCCAGU  
>N1228  
UUUGAAAUGUUGUAGUUGAACUAUGCAGUUGUGAAUUUUA  
>N1229  
GACCUUUUUGAAUCCUGUGGACUAUACCUUGGGUAUUCUGU

>N1230  
AUUGAUAUCCUCCUUAAGGACUCUAUUUAUCUUCAUGAGAU  
>N1231  
UUCAUUUUCAGGAACUUUAGACUGCCUCAGAGCAGAUUUUG  
>N1232  
CUUCCUCCUCUGUUUUUAGAACUGUGGUCAAGUGUAGUAUA  
>N1233  
GAAUUUACAGUUUAAGGUAAACUUCCAUAACACUGAUGCUC  
>N1234  
AUA AACUAGGCUAGUCUUGAACUCAAAGAUCCA AUUACCUC  
>N1235  
UAUUUUAAAACUAGAAUUGGACUAAGGAACGCCCUUCGAGA  
>N1236  
CAAACCAACACAGAAGGUAAACUGUACAGUUAAGGACAAGG  
>N1237  
CGUGAGGCACUAAGAGAGGAACUGAUUUUACUCAUAAAAG  
>N1238  
AAAGGAAGGAAGGAAAAGGAACUGCAGCCCCAGUUAUUUA  
>N1239  
AUUUUAAAUGAGAUCAUUAACUGUUAUUUAGUAAAACUAA  
>N1240  
UCCUGGAACUAGCUAUUAGACUAGGCUGACCUCUAAGUG  
>N1241  
UCAGCAUUUAUAAAGUAUAGACUUGUUAAGAAACAUCUAA  
>N1242  
AUUUCAGAUUAAUUUCUUGGACUGGAAGAAAGAUUGACCCU  
>N1243  
GAAUGAUACCCAGACUCAAAACUGUAUGCAAAAGCAAAGAG  
>N1244  
CACAU AUGAAAUUCUCAGAAACUAUUUUUAAAAGUUUCUUCA  
>N1245  
CAGCUAACAGCUUCUGUAAACUGCUUGCUUGCUUAAAACC  
>N1246  
GUACACACAAGGCUGUUGAAACUUUAAA AUAGGUUUAACUG  
>N1247  
AUCCA AACUGUCUAGUAGGAACUUGGGGGAAAACAUGCUU  
>N1248  
AGAACCAGCAGGUAAGGGGAACUGAUGUGUAUGCUUGAGUG  
>N1249  
AGGUGGUUCAGUAGUUAAGAACUUCUACUACUCCUGUAGAG  
>N1250  
AUAUCUCUCCGUAUCAGUGGACUCAAUUCCCCAAUAAAAG  
>N1251  
UUUAGUGGGAAUAUGGGGAAACUAUAUCAGUAGUCAA AUG  
>N1252  
GGGUUCUUAACA AUGGGGAACUGUAUUAAGGAUUAGGAA  
>N1253  
AUAGCCAAGGCUGAUCCUAAACUUUUUGGCAAGGGUAAGGG



>N1254  
AUACCCUGACUGACGUUGAACUUGCUAUGUAGACAAGACU  
>N1255  
AGAAUCCUUUUUCUUGAGGACUAGAACUAUGGUAAGUUAU  
>N1256  
CAAAGGAAAUAAGAUGGAAAACUGCAACACAAGGAAGGAAA  
>N1257  
ACCCAGUUUUUAUAGAAUAGACUAUACAUGUGCAUGCACAC  
>N1258  
AACUACCUUUUUGACUGUAAACUAAAGGCUGACAAAGACUA  
>N1259  
UUUUUAUUUGAAGUGAGAACUCUCCCUACUGUGUUUGGU  
>N1260  
GCAUUUCCCUAAUAGUAAAAACUGGAAAAAUGCAAGUUCAU  
>N1261  
GUAACAUC AACUCCUGAGAACUUCAACAAAUAUUUUUUUC  
>N1262  
AGUUGUUGCUCAGGGUUAGGACUUGUGUAGCAUGUGCUAUU  
>N1263  
AAUGCAUAGCACAAGUUCAGACUAUUGUUCCAAUCUACAAA  
>N1264  
GUAAGGUACCUGCCACCAAACUUGAUGAUUUGAGUUCAAU  
>N1265  
GUCAGUUCUCAAGAGGGAAAACUUGGAUAGUGUCCUGUUA  
>N1266  
CAUAAAACUCUACCAGUAAAACUGCCUCUUAAGUUACCUUU  
>N1267  
UGCUUUUAAGUGGGACUAGAACUUUACAUAUUAAGAACCA  
>N1268  
ACCUCGCAUGUAGCUUUAGGACUUAACUAAGCAACACUACU  
>N1269  
CUUCAAGAGGAGAACUGGAACUCACCAACAUGUGACUUGC  
>N1270  
AUAGCAUUCAGAUGUACAAAACUACAGCAUUCAGAGGUACA  
>N1271  
AGACUGUGUGCAAUGGGGACUAAACACCUUACAUGUAU  
>N1272  
UGCCAACAAGAUGAAAGGAACUGGGGAUAUGAAAAGCGCC  
>N1273  
UCAGCUAUGUCCUGAGAAGGACUUCCACACAGAGCCUCACU  
>N1274  
CUGUUUAUUGAGCUCUCUAAACUCAGAUGUCAGCAGAAGAA  
>N1275  
UACUUGUUUGUUUGUUGGAACUUUUAAAAUUAAUAUAAU  
>N1276  
CAGAGGGAAAUCAAGUUAGGACUGAGUUGGAAACUUUCUUC  
>N1277  
GAUGCAAGCCACAGUGAGGAACUGAAUCAGCAUGAUGUCA

>N1278  
GGGUAGCUUUCAGAGGGGACUGGGCCACCAGCUAGGGCU  
>N1279  
GAUUAUCUGGCUAUCCUGAGACUUGCUCUGUACACCACGCU  
>N1280  
AUGUCCUAAAGAAAAGUUGAACUUGAUGGUUAUGUUAUUUU  
>N1281  
CUUUCAGGCAAACUGGCUGGACUAGUAGUUGCAGCAGGCUG  
>N1282  
GAGCGAAGGCUGUGUACUGAACUGUUGACAUUUCCAGAAG  
>N1283  
CCAUAACUGAUUCCUCUGAACUCCUAUGACCUACAACAAC  
>N1284  
AAGGGAUAAAUACCUCAAGGACUAUAUAUCAUAAAACAUGU  
>N1285  
UGUUACAACUAACGGGUAAGACUUAUCUUAUAACUAAAUG  
>N1286  
AAAUGC UUAUUUAUAGAAACUAUUUAUAAACGUUAAUUA  
>N1287  
AUAUGGCAAUUCUUAAGACUCUAGAUUCGAACUCAGGU  
>N1288  
UGGCGUCGAGAAACCCGGGAACUACCAUCACACCAGCGCAA  
>N1289  
UGCACAGGAGUCCUUCUCAGACUUGUGGCCAGAAUGACGG  
>N1290  
AAAGAGUAAGGGGUACAGGACUGGUUAAAGGUUUGCCGUG  
>N1291  
GGUGUUGCCAUCUGCUGUGGACUUGUGUUUAUGCUCUGGUU  
>N1292  
UACUUAAGAGCCACCAAGAGACUACUAGGUUUAAAAAAG  
>N1293  
UUUUCAUCAUUGCAGUAAGAACUCUAACUAGAACAGCAACC  
>N1294  
UUAAGGAAUCUAUGUUGAGAACUCCAGUCCAACUCAUCCA  
>N1295  
AGACGAAGGACAGCGAUGAACUGAGCCGGACAUGAGAAGU  
>N1296  
CAAUGUCACAGCAGGGUAGACUGAUCACAAGUCAGCUAGG  
>N1297  
AAUUUAGUAGGAUCAAAUAGACUAUUAAAUGAUUCUGGACU  
>N1298  
AAGGAAAGUUGACCUGUGAAACUGGUGAAAACAAUCCA  
>N1299  
GGGAACUGUUUAGCUAGUGGACUAUAGACCAAUUCUGUCA  
>N1300  
CUGUCUUGAAGAGAAAGAGGACUUUAUGCAAGAUGGUUUGC  
>N1301  
UAACCUCCACUCUUCACAAGACUCCCCAAGCAAUGCCUUGU

>N1302  
GAGAAGGCUCACUGGGGCAAACUUUUAAAAUCCACCCACUG  
>N1303  
UUUCUAGAAAAUUAUUGUAAAACUGUGAGAAAUGAAAUUUAU  
>N1304  
CUAAGUAGCAGCAGAUAGAAAACUAAAGUAUGUAUUUAAAAA  
>N1305  
AGUACCCGGAUGAAUUUAAGACUUUUUUUUUAAUCAUUUGC  
>N1306  
CGCUGGGCCAACCCUCAUAGACUGCAGGCGUUGGUGGAUAA  
>N1307  
AAGUCUGUUGUAUAAGGUAAAACUCGAAAGUUUAGCAGUGA  
>N1308  
UUGUUGC UUAAGCAGAAAAAACUCACUUGUUUGACCAACAA  
>N1309  
ACUGUUUUUCUAAAAGCCAGACUUGAAAACGUGAGUGUACU  
>N1310  
UAUUGCAACAUGUCCUUUAGACUAUUUCAGGCUAUGCUGGU  
>N1311  
CUUCUGAUAAUGAAGGAAAGACUGACCUUAUCCUAGAACAG  
>N1312  
UGCAACAGGAAAUAGUCUAGACUAGUCCAGAAUAGCUAGC  
>N1313  
AGUGGAGAAAGAAGCAUAGAACUAAAACUACAUAUAGUAAA  
>N1314  
AAGAGGCAAGCAGAGUUUGGACUGUGUGAGUAUGAUGGAAG  
>N1315  
GAGUUAUUUUUCUUUCUGAGACUGAUGUACUUCACUUAUUA  
>N1316  
AAUUUAUGGGAGUGAAAUGGACUUUUUCUUAUUGAUGAUUG  
>N1317  
UGCCUUCUUACUGUGAUGGACUUAUACCUUGGCAUUGUAAG  
>N1318  
AAACAAGAGACCCUAUACGAAACUGUGACAAGCAAUACCCAG  
>N1319  
AGUUAGAAACUUGCAUUUAAAACUUUAGGAGCUGCGUCACCG  
>N1320  
GGAGCCAAAACAGACAAGAGACUAGCAAACCAACCUUGUGAC  
>N1321  
CUUACAAUUUUAAACAGCAAAAACUUUACCUGGAUGCUUCCU  
>N1322  
GGCAGGCCUAAUAUAUAUGGACUCUUCAUUGGCACAGCCCA  
>N1323  
CAUGGCUCCCAGUUGAUGGAAACUAUUUGGGAAGGAUUAAGA  
>N1324  
CUUUAUUUACAGAACCUAAAACUAGAGUCUGUCAGCCAGAA  
>N1325  
AAUGUAUAAUUUAAAUGAAAACUAGUAUUCUUAUACACCCA

>N1326  
AGGCAUCUGGAGGAGUCCAGACUGAGUAUGGCCAGCAGAAU  
>N1327  
UUAUAUUUUAUUUAGACAAAGACUGAUUUUGUUGCUGAAACA  
>N1328  
GGUAUGUGGCACUGAAACGAACUGGGCAGUAUAAACUCGGA  
>N1329  
AAGCAAAAUUUGUCUCAAACUGCUUUCUGGACAUUGUGA  
>N1330  
UACAGCCAAUAAAUGUUGAACUGUUCAUGAUGGCAACAUI  
>N1331  
GUUUUUUACCCACCUUAGGAACUCAAGGACUUCUGGGAAC  
>N1332  
ACCCGCUAAGCUUGAGCUGGACUUGCCAUIUGGUAGAGCUU  
>N1333  
UUUUUUUCCUUCACUUUAAACUUGUAGGUUAUAGUCAUA  
>N1334  
AUAGUCCUUUAGUUGAAAAACUACUACAGAUUAUUUUUCC  
>N1335  
AAAUGUACUUCUAGAUGAGACUGAAAAUGAUGAAAGUUCU  
>N1336  
AUCCAGCUGCGAGUCCUCAGACUUGAGCACACCCUUGGCUU  
>N1337  
AAUAUUAUUGACCUAACUGGACUUUUUGUUGUCUUAUCAGU  
>N1338  
UCUUCUGUAAUCUCCUAAACUUUUGGCUUGGCUUUAGUG  
>N1339  
AUUCUUCAUCACACUGCUGGACUAUAGAAAUAUCUUGCCA  
>N1340  
UGGGUUUAGCCCUUCCAAAACUUGAUUACUUUAGGUACGU  
>N1341  
AGUAGUUUAUAGUGAAAACAGACUUC CAGUUGUUGUCUUUUC  
>N1342  
AAUAUACAUGCAUUGGAAAGACUGUGUAAAGCUUUUACAUI  
>N1343  
UCAGCUUAUAUUUAAAACAAACUUUACUGAUCCUGAGUUGA  
>N1344  
GGUUCUGCCUAAGAUAGUAAACUGUGAAGUUCUGGGCAAGC  
>N1345  
CAACCAUGCCGCCAGGGGAAACUCUACCGUGUUGUCCAGAU  
>N1346  
UCAGCAGAGACAAAGUAGGAACUCCUGGCUCAAUAGCCAGC  
>N1347  
UACUUUGAGAUUUCAGAAGAACUCCAGCCAUIUCCAGUGUC  
>N1348  
UGUUCAGAAAGUUUCCUGGAACUAUUGUUUCCUAUCUUUA  
>N1349  
AUAGACAUUUAGUGCUGUGAACUUIUCCUCUAGCACCACUI

>N1350  
UACUUACAUAUUCUUUGAAAGACUUAUGAGCAAUUUACGUG  
>N1351  
GUUGGUUAGUUCUCUGCGGGACUAACAUAUCAAAGGCUCAGGG  
>N1352  
UCCUUUUUAUUUGAUCCAGGACUCUAAAUGCAUACAAUGGUG  
>N1353  
AGGAGGGGAUAGGAAGCUGAACUUGGUUGGAAGAAUAGGU  
>N1354  
AUACUUUGACAGAGUAGAAAACUAGUGUUUUGAAUUUUUA  
>N1355  
UUACUGGGCAUUAUCCUGAACUAAUUUUUAUGCUACUCUG  
>N1356  
AAGAGAUUAAAGAGGAUUAGACUUAUGAAUGUUAAAUAAA  
>N1357  
ACGUUGGAGCUUACUGGUGAACUGGGGUAGCUGAAUUGAUA  
>N1358  
CAGAUGAAGGUCCAGGACGGACUUGCUGGUUUGCAGAGUCC  
>N1359  
GGGACAGUCCUUGGUUCCAAACUAAUUUAUUGGUUGUUCAUU  
>N1360  
CCAUGAAGUACAAACUAGAACUUGACCUGACUCAAGCUGG  
>N1361  
CCAAGGACCUAGCAGUAGAAACUAUGCCAGGUAUCCAGUG  
>N1362  
GCUUUGUGCUUGAAGGAGGGACUUCAGUGCAAAAACAGUGC  
>N1363  
UAUUACUAAAAUAAAGCAGACUUUUCUGUGAGGACCUCAA  
>N1364  
UUUAAAAAAUUAUCUAUGGACUCCAAUUUUACUGCCCAUA  
>N1365  
CAGCCGCGCGCAUUAAGAAAACUAACAUAAGCUUUACCAUU  
>N1366  
CUCUCAACACUUCUGUAAGGACUUUGUCACUUACUUUUUG  
>N1367  
UGACCAGCCUCGAAGUGUGAACUUCCUUGGAUUCAAAACAA  
>N1368  
CAAAACAAAACAAAACAGAACUUAAGUUCUGCUGUCC  
>N1369  
UGAUGGACUGAACUUCUGAAACUGUAAGCCAGCCCCAGUGA  
>N1370  
GGCACUGUCUGGGGUCCCGGACUGAGCAAAAAGGAGAAAGU  
>N1371  
UUUAUUUAACAUCUAGGGACUUGUAUAUGUGAAAUCAGU  
>N1372  
ACAGUGGGACACCAUUGAAAACUGUUUAGACUUAAGCAA  
>N1373  
GUAGACCAGGUUGGCUUCAACUCACCAGAGAUUCAUAUGC

>N1374  
GUAGUCAAGGAUGACCUUGAACUCCCAGCCAUCCUGCUUCA  
>N1375  
ACAGUUUGUAGUCCCUGAAGACUGAUGCAAAGGCCAGGGGG  
>N1376  
AGAAAGCUUCACGUGGGAAAACUCACAAUAUUUUGAUGCCU  
>N1377  
CAAAGUUGUGGUAACCAAACUGAUAAAGAGGAAUAAUA  
>N1378  
AUCUUAGCUUCUGUUAAGAAACUGUCUGCUUGUGCUACCCU  
>N1379  
AUUCCUAGUCUGAGGGUAAACUGCCUUCUUUGCUCCAAGC  
>N1380  
AAAGAGCAAACAACAAAAACUCCAUGCUGAGGGACUUGA  
>N1381  
GACUUGCGGAUAUUCUUUGAACUGGCUCUCAUUUUUUUCUAU  
>N1382  
UACAGCCCGUGGAUAAUCAGACUUGCCCAUGAGGACCAAGU  
>N1383  
UGCAUCAUGGCCACCAGAGACUCUCUUUGCUGGGUUUCUC  
>N1384  
UCACAGAGUUACAUAUGAGAGACUCUGAUUCGAAAACAAAGA  
>N1385  
AGAGUUUGGGUUUUGUUUGAACUGGGGCCUGUGAGUUCACU  
>N1386  
GGCUGGGUGACCAGUCGAGACUCUGUGGUGGCCAAAACUC  
>N1387  
CCUCUAAAUCUACCUAUUAAACUACGUUCCACCUCUCAAGU  
>N1388  
GGAAUAUGGGCCUGUCUAAAACUACCAGACCAAUGGCUCGA  
>N1389  
GGUGUUCUUGUCCCUAGGAGACUACAUUUUUUUCUGGCAUU  
>N1390  
CAACUGUAAUUAUUAUAGAACUGGGUGAGUCGCAGGUCAA  
>N1391  
UGUAAGGUCAGUUUAGUUAACUUCCCAUUUUUUUCUUAAG  
>N1392  
CCUUUCCUUUUCCCUCAAAAACUCUUUCAUGUGCCAUUGUU  
>N1393  
GCUCUUAUGCUCUGUUGUGAACUUGGAGGCCAUGGGACAAC  
>N1394  
UUUAGCUAUUGUCAGACUAAACUCUUCACCCCAAGGUGGUC  
>N1395  
AAACCCUUAGCAAAAAGGAAACUAAAUGCUGGUAGCUUUGA  
>N1396  
AAGCACAAAGUGUUCAUUAACUCGAAGCCUGUGAAGCCC  
>N1397  
AGACUUUCCAGGACUGUGGACUUUAAUGGAUUAGGUUUUU

>N1398  
AUUAUCCAUAUGUAUGGAGACUAGAGGUCAGCCUUGGGUC  
>N1399  
GAAUAUAUGAAUACGUAAAACUAUCACUCCACCUAACAGA  
>N1400  
AUCUGUCCUGUCACCUUGAGACUGCCCCUGUCACUCUAAGA  
>N1401  
CCACCUCUCCAACUCCAGAGACUUUCUUAUGUAAAACUUU  
>N1402  
UACUUUCCUGAACACUUUGGACUUCGUGCUCUUUCUCCU  
>N1403  
GAGGAAGAUGCUCGAUGUGGACUCCUGGCCUCCACAGGUAC  
>N1404  
CCAUCAUGGAGGCAUGAUGAACUUUGUCAAGUGUCCUUUCA  
>N1405  
CUAAAUACAUAUUACAAAAGACUUGGUCCUAGAUGGUGGC  
>N1406  
ACAUGGCCAUUCCACUGGAGACUGUCUGUGGGAUUCUGAUU  
>N1407  
CAAUGCAGGCUCUUUGUGAAACUCGAUACUGUCCCUUCUG  
>N1408  
UCAACGAUUGCUCUAUAGGAACUAGAAAUAUCUGAAACCUG  
>N1409  
AAUUUGAUCCUAAAUCACAAACUACAAAAGUAUAGCACUG  
>N1410  
CCUUUACACCUUUCUAUGGGACUGGCUUCAUGGUGAGCACA  
>N1411  
CAAUGGAACCUAUUCUUCAGACUCACUCCGAGUUGCACAA  
>N1412  
GGAGGCUCACAAGCACUUGAACUCCCAGUUACAUGGGAUCU  
>N1413  
AAAUAAGUUACAAACACAAAACUGUUAAAUAAGAAAAG  
>N1414  
GAGCAGCCAGAACACAGUGGACUUAGCAGCAGCGUGAAAGU  
>N1415  
AAGGUAGCCACUAGGCAAGAACUGUCCUAAUUCAUCUACAG  
>N1416  
AUUUGGUGGUGAGGAAAUAAACUGAGAGGUGGGGAAGUGGC  
>N1417  
AAAAGGGGAUUCUAAACAGAACUUGAGCAUAAAACAUUAGC  
>N1418  
AAAGAUUCCUGAUAGGAAAGACUGAGUAGUGCUGAUCAAAC  
>N1419  
AGAUACAUAUCUUAACUGAAGACUUGCAAUACCAAAGGGGU  
>N1420  
CUUGAUCUUGGAUGCCAUAGACUCCAGAAUUCUAAGAACUU  
>N1421  
UAGGCAAUUGUUGUAAUUGAACUGGACAAGUGUUAUGUGA

>N1422  
UAGGCAAGACUCUUUCUUGGACUAAGUGGGAGUCGCUCCCU  
>N1423  
GACAUCGGCUUAGGAAUGAAACUUAUGCCCAAAGUAGAGU  
>N1424  
GUGCAUUUGUCAUUUGGGGGACUUGUCCGAGCUGAUCUGAA  
>N1425  
AAAGAAGCAGAGUGAGAUGAACUAGUUCUUGUGGUUAUCUU  
>N1426  
CUUUGGCCAUUCUUACACAAACUCUGGAAUUGUCACUAGUG  
>N1427  
UAGCUGUCUGUCAUAUUAAAACUUGGCAAGUCUCACGGCUG  
>N1428  
UAUAGGCACAAUUGUCUUAGACUCCAUAUCUCUAGAACUG  
>N1429  
CAAGUUCAAGACCAGCCUGGACUACACAGUAACAGGUCAAC  
>N1430  
GAAGAGAGAAUAGGGAAGAAACUUCUCCAGCCAGGGGAAG  
>N1431  
GUCUGGCGCAUCACAGUGAAACUGGUCUCUAGGGCCAGUG  
>N1432  
UUGUGUGCAUAGUUUGUGGGACUCAGUGUUCUUCUACACGU  
>N1433  
AAGUGUUGUUCUGGUGAGGGACUGGGCCAAUCUCCCACGCU  
>N1434  
GGCUGCUGAACCAGAGGUGAACUCGCUCUUGACACAGCAGC  
>N1435  
UAAAAAAGCAGAGCUAAUAGACUGUAUACACACAUGUAC  
>N1436  
GAGAAUGCCAAAUAAAACAAACUCUACAAUGCCCUGCUCUU  
>N1437  
GAAUCUGUGGUUUCUAGAGACUGCAGUACUCCUAUAUAGG  
>N1438  
ACCUAAAAUUUAUCUGGAAACUUCUUGAACAAAGUGAAAU  
>N1439  
AACCUAAAUCCAUGCCAGACUCUUUGGUUUUGUUCAUUU  
>N1440  
UGACUCCCGGCUGUAGUAGGACUACAGACCUCAACAUGGCU  
>N1441  
UAAUGGACCAUCCUAGUAGGACUAUAGAAAACAUAUCAUGCU  
>N1442  
CAUAGCACUGAAAAAAGAAACUGAACAUAGACAGUCAUAG  
>N1443  
GGUCUCUGUCGGGGUUGAAGACUAGAUAGUUAUAGUCUUAG  
>N1444  
GGAGCCUCACCUUGAGCAGGACUCUACUUUGGGCCUGUCAC  
>N1445  
GGGAAUGGGCGCUGAAUUAAACUCCAUCUCCCUGAGUUGC



>N1446  
CUUUCUCAGAGAAGGAAGAGACUGAGUCCUUUCAUGUGACC  
>N1447  
AAAAGAGUUUAAAAAAAAAAGACUGAGGUAGUGAGGUAGGAC  
>N1448  
UAAAUCCUAUGUGCAAACAGACUUGGAGAAGCACCAUUUAA  
>N1449  
AAUGGAGGAUGUGGCCACAGACUAAUUCAACUGACUUCUUG  
>N1450  
GACAGUUUAUAAGGCUUUGAACUGUAACCAAUUGCCUUGGU  
>N1451  
GGAGCUUAUAUUAGAAAUGGACUUGCAAUAACCCUUCAAG  
>N1452  
AAACAUCUUAGUAAUGGCAAACUGUUUCCUUUCUCCAGAU  
>N1453  
CUGUUAGUUAAAUGGUUUGAACUUCUUUGGAAUUUGCUCUU  
>N1454  
CUUCCCUAUCUCCUGCUAAGACUUUGUUUGCAUCCUUCUUU  
>N1455  
AUAACUUUGACCAUGUUUAAACUCGAUCCUUUCAAUAUGA  
>N1456  
CAUUAUAAAUCCCUUAGAGACUAAGCCAAGCUUUGUCAGC  
>N1457  
GAAAUUUUACUGUUUGUAAACUAGCCAGAAUGGAAGCUGC  
>N1458  
GAGCAGCUCAUGUGCUGCAAACUGAGGAGAAGGCUGUCAUU  
>N1459  
UAUAAAAUGUAGUCUCUUAACUCUUGAUUUUUUGGGCAAUA  
>N1460  
CAGGCAAUCUUAGAAGAGAGACUUGUGUAACAGCCCCAACA  
>N1461  
CAGGGCCCUCUGUCAGUUGGACUUUCUUUUUUUAUUUUUAU  
>N1462  
ACUUGGUUUCUUAUGUCAGGACUAUGGCUGUAGGACUUGCA  
>N1463  
CAAGUCUUUGCUGCCAGGAAACUCCUGUCAGGAAUCUAAU  
>N1464  
GACGUCACAGAGAUGCAAGGACUCCACAGAAGGGUGUUCAC  
>N1465  
CAAUUUGGUUUUUUAUUUUAGACUUGCUUAUGUUACUGGGAU  
>N1466  
CAUAAACGUCUCUAAUACAGACUCGCAGCAUCCACAAACA  
>N1467  
GUCUUGUUUAUCUAUUUUAAACUCCUCCUCUGUCCAUAUUU  
>N1468  
GUCAGAGGUAGAGAACAGGAACUAUCAGAAGGAUACUCAA  
>N1469  
UCUCCCAUUGCUGACAGAAACUUUUCGAUGCUGUUAUAAC

>N1470  
UCCUACUCCUGUGGCCAUGAACUCCUUGCCACGUUAGGCUA  
>N1471  
GAAGGAAGGACCAUCCAGGGACUGCCCCCGGGGGGAUCCA  
>N1472  
UACCCCCAGAGUUCCCAGGGACUAAACCACCAAGCAAAGAG  
>N1473  
AGUUUCCUACUGAACCUGAGACUCAUCAUGAGCAAGACUG  
>N1474  
GUUUCUCAGGUUCCAGAGAACUCUUAUGAGUUCUGUGGGG  
>N1475  
AGCACACAGGGUAAGUAGGGACUGCAUGGGGACAGAGUCAC  
>N1476  
CUAACAGACAACAUAAAAAAACUCAAUCAACAAGAACCAGG  
>N1477  
CCUCCAUGGACUAAAGCUGGACUUCAACAACAACAGCAGAA  
>N1478  
ACGCUAGCUUUGCUAUAAAAACUCACUUAACUGUUAAGAG  
>N1479  
AAUGAACAGGCCACACCCGGACUGAAGGAGUCUGAUGACUC  
>N1480  
AAAAGUCACCUCACAGGUGGACUCAGAAGUAUAGCCUAAAG  
>N1481  
GCAAUGUGUUCUUACAAGGACUGUUUCACCAUCAGGGGCU  
>N1482  
UCAGACAAGGUCAGAGAAGGACUGAGCUGGACUCUGCUAGC  
>N1483  
AAGUUACACAGCCCCUGAAGACUGUGCUGUUCUCUCCAGAG  
>N1484  
ACAUCUCCAAGUCAACUUGGACUUCACUUUCAUAGCCUCUU  
>N1485  
AGACAGCUUGAAUUUUUAAAACUGCAAGCAUUUUUAAAAU  
>N1486  
CUGAUCUUUGAUGUGGUAAGACUGCAGCUGUUCACCCAACA  
>N1487  
UUAAGAGCAGCCUCCAGAGACUGGCCAGGAGGCAAGUUGU  
>N1488  
AGAUUCAAGGGAUGGCAAAACUUUCCUCCUCCUCUAGU  
>N1489  
GAUCAACAAGACCCACACAGACUGUGGGGAGAAGGAACUAC  
>N1490  
CAUUUUGGUUUGCCUAUCAGACUGCGAUCUUGCAGACAGCA  
>N1491  
UGAAAACAGGAAGGCACUAGACUUAUUCAAAUCAUCCAUCU  
>N1492  
AGCUCUCUACAGUGAUGGAGACUAGAGACAAGCUACUAUGG  
>N1493  
UGCUUUUUAAAAAGCCCAAACUCAGUUUAAUGUACUCAGC

>N1494  
UAAACUGUGUGUUGAAAAAGACUACGAUAUGCUGGUUAAAA  
>N1495  
CUGGCUUAGAAAAAAAUAGACUUUUUGGUGUGAAUAUUUC  
>N1496  
CAGGGCAACUAAGAAAUAAAACUGAAGUAAUAGAAUUACU  
>N1497  
ACUGAGUGCACCCAACACAAAACUGUUUAAACUAUUUAGAAC  
>N1498  
GGGACAGGGAGAUGAUGGGACUGGGGUUAUAUCAUACAAAA  
>N1499  
CUGGGGUACUGAGGACUGAGACUCUCCUAUGUGGGGGUGGA  
>N1500  
ACUUGAGUCAGAAGGAAGAGACUAUUUAUUCUCAAUUGCUC  
>N1501  
AAAGCUGCAGGAGAGACUGAACUUUCAAGCCAUCUAUCAUA  
>N1502  
GGAAGCUGGCACUUGCUCAGACUAAAACACAGACAAGGACA  
>N1503  
AGAACGGAAGAAAGGGAGAAACUUUAUUUUUCAUGUUAA  
>N1504  
CUUUAUUUUUCAUGUUAAACUUUCUAGUAUUGUUCAUAU  
>N1505  
ACAUCUGAGAACUAAGUGAGACUCAGUCUUUGAAUGUUGGA  
>N1506  
UUAAGAUUUUGUGAUCAAAAACUAGAGAAAAGUAACUAAAA  
>N1507  
AGCAUGGAUGCUUCUGCAGGACUUGGGUAAUGGGGUGAAGA  
>N1508  
ACCUAGAUGCUGAGGAUUAAAACUCAGGUCUGCAAGCUUGGG  
>N1509  
GGCAGGACUACUGGAUUAAGACUCUGUCUAAAAACAACAA  
>N1510  
UGCCUUCCCAACUGUGAUGGACUCAAGCCUCCAACCUGCAU  
>N1511  
UAAGGUAUCGUUCACUAGGGACUUUUACUCCCUAUGACCCU  
>N1512  
CUAGAGAUAAUGACUCUAAGACUGAAUUAUAUGAAUAAA  
>N1513  
UACAUCUCUGCCUACACAGAACUGGGGUUGCAAGUGUGUAC  
>N1514  
UGUCACAGUGAGAGGCAGAAAACUGUGGUUAGUAGAGCUCCA  
>N1515  
CCAACAACAACAAGAAGCAAACUAACAGAUAAAGCCAUCUC  
>N1516  
CAUACAUAUAAAAAAGAAGAACUGUGGGUUAGAAAUGUUUA  
>N1517  
CAGGAAGGGGCAGGAAGUGAACUUUUGUAGUUCUAGAAUGA

>N1518  
CCGUGAGCCUUCUGAGAGAAAACUCCUGAAGCAUCUACAUA  
>N1519  
GUAGCCCAGGCUAUCCUCAAACUCGCUAUCCUCCUGCUCCU  
>N1520  
ACUUUAUCUGCAAUGAUCAAACUACUUCAGUGCUUCAAGAC  
>N1521  
CCUCACUUAGCAACAUCCGAACUGAGUGUCCAUCACUAGG  
>N1522  
GGACUGAACCAUGUUGUAAGACUUGGCAGUAAGUCCCUUA  
>N1523  
GAGGGGUCAAGUACACCAGAACUCAACCCACAAAGAUAAC  
>N1524  
AUACCAGACAAUGCGAUGGGACUGAGUACACACCACAACGC  
>N1525  
UAGGUGCUGGAGUUUGGAGGACUCACACUGAACACACCACU  
>N1526  
AUAGAAGCAGAAGCAGGCAGACUGUCACAGGCUCAAGAUCU  
>N1527  
UAUUGGGUCCCGGGGAUGGAACUGAGCACCACUCAUGCC  
>N1528  
CAGGACCCUUUUUCAUGGAGACUGUAUCCUAGAUGAGAGGA  
>N1529  
ACCUGGGUGCUAGCAAUUGAACUUGGCAAUGUGUAAGUGGU  
>N1530  
AAAAAGAAAAAGAAAAAGACUAUAGGAUAUUUAGUUACA  
>N1531  
AUUUUUAAAAAGGUUACAGACUACAGCGAGGCUCCUGUG  
>N1532  
GUAUGCAGUGACAGCCAGAGACUCGCUGGACCUGCAGAGAG  
>N1533  
CCUGCUUGGCUCACCAAGAAACUCUGCUAGGAAUCAACCC  
>N1534  
AUCUCACGUGAUCAUUAAGGACUAAAGAGCAGAGUGGGGUG  
>N1535  
GUAGAACAAGUUGCUGACAGACUGGUGAAUGGAUGAGUGAC  
>N1536  
AAUCUGAUGGCUAACAGAAGACUUGUCCAGUGUCUACUGG  
>N1537  
CUUGUCCAGUGUCUACUGGACUGCGUUUAUACUCAUUUA  
>N1538  
ACAUGGCUUGCACUAGGGGAACUCCUCCUCCCUUUCU  
>N1539  
UAUAUAUGCAUAUACUAAAAACUCAACCCUGCCCCAUGUA  
>N1540  
CAUAACAACAUUUUUGGAAGACUCAUUAGCAAACAUUUUU  
>N1541  
GGAACUGGAAAGGUGGAGGAACUCAGCUGAGAACCAGCAUC

>N1542  
AAGACUGUGACAUCUCCAAACUUC CCCAAACAAAACCACC  
>N1543  
UUUUCUUCUCCCAGCAUGAAACUCCAGGAGAAAUCUUGGUC  
>N1544  
UUAGAUUUAGCAGAAAUGAAACUCUGUAAGUUCAAAUAGUU  
>N1545  
UGGCCUGGGCUGGGCACUGGACUACA UAAAAGUAGAGGAUG  
>N1546  
AGACUCACGGGAAUGACUGAACUCAAUACGUUUACUGAUG  
>N1547  
AACCCAGACUUUUGUGAAGAACUUCACUCUCAGUACCUGAC  
>N1548  
UGCAGAUUCUGUGUCUGUAAGACUCUUAAGUGUGAGUGCAUG  
>N1549  
CUCAGAUACUAACAAAUGGACUCCAGGGUGAGUCAAAAUG  
>N1550  
AGCUGUAUCGGGAGGGUGGGACUGGGCUUCUGAGAGCACUG  
>N1551  
AACGGUUAGCCAGAAGCAGAACUACAGAAGCCAAAAGCAA  
>N1552  
AGCAUAGUAGAGACAUCAGGACUGGGGGAAUGGAAUGGGGA  
>N1553  
GAGCCUCCACCCAGCUUAGACUGUCUGACUUUCCUCCUG  
>N1554  
UCCCCGGUUUCCCUUCAAGAACUCCCCUUAUCCCAUCCUCC  
>N1555  
AUUAUAAAAGAACCCAAGAAACUAGAUUUAAAAACUAAA  
>N1556  
AUGAAUUGGCUUAGGAAGAAACUCCGCUAAUAUUCAGGACA  
>N1557  
AAACAGGUGAAGGAAAUAAAACUAUGCAAGACCUGAAAGUU  
>N1558  
UUUUCAGGUAAAUGAAUGAAACUUAAGAAUAUCAUUCUGAG  
>N1559  
GUGUGUCUAGCCUCGAAAAGACUUGAAGUGCCAGGGGAGGG  
>N1560  
CAGCCACAUUAAGAGGAAAGACUUAGCUGGUCUUGUGACAA  
>N1561  
CAUGUGGAAAUAAACCAGAAACUACAGUCAGUGUGAGAUAC  
>N1562  
CACUGUAAAACUUCAUGUGAACUUGGUAGCAUGGAAAUAAG  
>N1563  
AGGGCCUUUUUAUUCAUGGAGACUCCUCCUGUCCAGGUUAG  
>N1564  
CCCAGAAUCCAAACAUAACUAUCUUCAGUUGGCAAAAU  
>N1565  
UUCAACUGUGCCAGGCUGGGACUGGGACACUGAAUAUUAUA

>N1566  
ACCCACUGAGCGGUCUAGAACUAAAUACUCAAUAAACUUA  
>N1567  
GAAGAAAGAAGUUUUGAGGAACUAGUGUUUUGC AAAAGUAC  
>N1568  
CGCUAAUUCUGAUGAAGAAGACUUCGCUAUCAGCCUGUGCC  
>N1569  
GCAGUGGGAAGGUAUGUCAGACUCUGGCUUCCUUCUGUUGU  
>N1570  
AAUACACUUUAUUGUAAUGAACUCAAAUGAAAAUAUCACAC  
>N1571  
GAGAGGAUUUAAAACCAUAAAACUCGACUAUAUAAUGUAAGG  
>N1572  
AGGCCUACUGGUACUACAAGACUAUGAUGCAGCCUAAGAAA  
>N1573  
UAUGAAUAGAGCAGCAGGGAACUUGGUUGAGUAAGUGUCUC  
>N1574  
AUGUUCUUGUAUCUGUUUAGACUUGC UUUGUGUCCAAGUAU  
>N1575  
GGCCUUUCUGGGGUUAAAAGACUGCUUUGAGAAGCCAGGUG  
>N1576  
UCCUCCUCCUAUAUCUGGAACUCAAACAGUCUCACAGUUU  
>N1577  
AAAACUCUGGCCCCACAGGAACUGCAGGGCUUCUAUAAACC  
>N1578  
AGCAGAGAGAAUGACCUAGGACUCAGCAGGACGCUUAGACU  
>N1579  
AGCCACUCCUCUGUAUGGGACUGAAGAGUAAAGUGCUCUG  
>N1580  
UUUUACAACACAAACAUA AAAACUCUGGAAGUCUUUGAUAGC  
>N1581  
AACAUCCCAGAUGUGUCAGGACUGUCCUGUGACCAAGUCAC  
>N1582  
AUGUGGGUACUGGGAGCAGAACUCAGUCUUCUGGAAGAGCA  
>N1583  
GCUUAAGUCACAAGGAUGGGACUCAUCUCACCACUGAACCA  
>N1584  
CAAUGUGUAACAAAGAAAAGACUGCCAGCCCCAUGGCGUGA  
>N1585  
CUGCCAGCCCCAUGGCGUGAACUGUGACCUGGGUUGGAAUG  
>N1586  
AAUCCAGGAACCUCACUGGGACUCCUCUCGGAUAUCCUGUU  
>N1587  
CAGUCUUACAACAUAAGUAGGACUCUUGAUCUGCUUUAUGAA  
>N1588  
CUUCACAGAGCCUUAGCAGAACUUAGUCCCAAGACAUAGCU  
>N1589  
AGGUAGAUCAAUGGAAUAGAACUGAAGACCCAGAAAUAUAC

>N1590  
CCAUCUCAAAAACCCCUCAAACUGAAUGCCCCUCCCUUCUC  
>N1591  
GAGGUUAGAGGCAGUUGUGAACUAUCCCAAUAGGUACUGG  
>N1592  
AACGGAAGGGAUGCCUACAGACUUCUACUUCUGGACCCUCA  
>N1593  
UAAAAAAUUAUCA AUGUAAAACUGCUCACAGUUGCACCUAU  
>N1594  
UUUUAUGGAAAAAAUCAAGACUGUGUUACAGGACAUUUAA  
>N1595  
AGUACUCUCUACCAGUCAGGACUCUGAUUACCUGCUCUGGA  
>N1596  
ACAUAAGCAAUCUCAUGAGAACUUGAUGCCAUGAUUCAUA  
>N1597  
CAGGCAGAGGAUACCCUUGAACUAGAGUUUCAUGUGAUUCC  
>N1598  
GUUGGGGCCACUUCAUUCAAACUGUCACAGAGCCUAUGUUU  
>N1599  
AUGCCAGUCCAGGUAGCAGGACUGCAUUCAGAGUUGAUUCU  
>N1600  
GCCAACCUCAGAGCUGUAAAACUUAAAAAAAUUCAGAAAG  
>N1601  
UAGGUAAUGAGGUGGCAAGGACUUCCCUUGUCUGUAGGUGG  
>N1602  
AGCUAAGCUCUAAGAAAGGGACUAUUUUUGGCCAUUCUCAU  
>N1603  
UCUGACAAAGGAGAACACAGACUGUGGUGAACCUGAUUCA  
>N1604  
UGCCAAAACGGUCAUGAAGAACUCCUGUGUAAAAGCCAUUA  
>N1605  
GAGAAAGGAAAGAACAAAAACUCAGAGCGGGGGGAGAAAG  
>N1606  
UACUGAAGCAAACAUGAAAGACUGUUUUUCUGAAGCAGACA  
>N1607  
UUUCAGAGGGAAGAUUAAAGACUCUUUUUCAGGGCCAUUGCU  
>N1608  
AUCUCCCUAUUGGUACACAGACUGUUUGGUGAGUGUCCGAU  
>N1609  
UCUGCAAGACAAGUCCAAAAACUUGGCUGCAGUCCUAAGGC  
>N1610  
GACAUCCUCAGACUGCUUGGACUGGUUUCACAGAUUCUCC  
>N1611  
UCCGCGUCCAGGACGCUCAGACUUGGGAUUCAAUCUAAGA  
>N1612  
CAUUCUGGACACCGCCACGGACUCUGACAUCGGCUCCAACG  
>N1613  
GACUCUUGUAGGCAAGCUAGACUAUGAAGCAACCUCAGCCU

>N1614  
CUUUCUGGCCAAAAAGUUGGACUUUGAGACACAGUCUUUUAU  
>N1615  
GCAAUAUGUCGAAAAGGGAACUUCAGGCCUUAUUCAGGCU  
>N1616  
UACUGUAAAUGCCUUUUGAAACUCCUGCAGUAUUUGGGCAU  
>N1617  
GGCCUGAGAGCCGCCUGAGACUAGCAUGUAAGAUGGACUG  
>N1618  
AAUAAGUUGGGAGCUGUGAACUACAAAUGUAGUCAGAGUG  
>N1619  
AUUCAAGCUUCAGAUACAAAACUCUCUGAACUAAGUCAAUU  
>N1620  
AAUGUCUAGUUCUAUAGAAAACUUGGCAUUCAGUCAGAAUG  
>N1621  
AUUUUAGAGUUGUGAAGUAAACUUAUUGCAUUUCAACAGAU  
>N1622  
AGUGAUUCCAUCUUGGGCAGACUUUAGAAGAGAAAUUGUUC  
>N1623  
UCUUAGGAGAAUUCUGGAAACUAUAGUUUUUAAGGUAUUC  
>N1624  
CUAUCUUUUGCUGUUGAGGGACUCUUGAUUUUGAGAUUUGUG  
>N1625  
UUUAAAAGCAAACUAAAAGAACUGAAAAUGCACAUGCUCUCC  
>N1626  
ACAGGGUAAGCUUUGCCCAGACUCAUGACAACAGAAUUCCC  
>N1627  
AUACAUCUUUCUUCUGAAAACUUUACUUAUGUAGGGAAAC  
>N1628  
CAGGAUUUUAUUUUUUUUUAAACUAUGGUUAAAUGGUUCAUA  
>N1629  
GCAGCCACAGAGAUACAGAAACUGUAAGCACCAAUCUCUU  
>N1630  
AACAAAUGUAUAGCUUAGGACUAUUGUAGCAACAUGUUGG  
>N1631  
GGCCUAGUGAAAGGAUCAGGACUUUCCCAAGCCAUACAGCC  
>N1632  
GCUCUUGGAAGAGCUUAUAAACUCUAGUAUCUGCUGGAAGA  
>N1633  
UGAGACAUCAGAGACAAUAAACUUUAUGCUGAUCUCCCAG  
>N1634  
UUGGUGAAUAUUUAUUAUAAACUUAGAUGUUACAUGAAAG  
>N1635  
CUGGGCAGUGGGACGUACAAACUGACCACCAUGAAGAAGGU  
>N1636  
ACCCUUGCUCUAGGUGUUGGACUCCCUCUACCUUGGGCUAU  
>N1637  
GCUUUGAGGAUAGGUGUUGAACUGUGAGGCUCAUUCUCAA



>N1638  
AAGCAUGUUACUGCAUUUGGACUCUAACAUGGUCAUUUAUUA  
>N1639  
AAAAAAAAAUGAGCAAAGUGGACUCAGAGAGCAGCUGUACUG  
>N1640  
UGUGGGUGUUGGGGAUUUGAACUCAGGUCCUCUUGCCUAUA  
>N1641  
UUCAUUUUUUAAAAAUGAAACUUAGUGAUUUAAACAUGCUU  
>N1642  
AGUUGGCGCAUCGCUGAGAAACUCUUGGGUGUCUGUGAGGG  
>N1643  
AAAUGCUUGUGAACAAACAAGACUAAUGAGAAGCAGAAUCCU  
>N1644  
GUAGAGUGCUGGGGAUGAGACUCAAAUAGAAGGAGUUGUU  
>N1645  
UGCUCAUUAACCAUGACCAAACUCUUGGGAAAGUCUUUUCA  
>N1646  
CCAAAGAACUUCACCAAAGAACUUCUCAUAGUGUUCUGGCU  
>N1647  
UAUCACCGUUUCCUAUUAAACUUUCUUCUCCCUACCUUU  
>N1648  
GUUGAUUAUUCUAUUGGAACUCUCUAUCGUAUGUGUAAA  
>N1649  
CUAGUUUGGAAUAAUUGAAAACUGAAUAAUACAGCAAAAUG  
>N1650  
GAAUAUUCUGUAGCCAUAACUCUAAAACUGUAAGACCCCA  
>N1651  
GGUUUAUGAUCCAAGCCCAGACUGUAAUAUCGGGCACAUCU  
>N1652  
CCAAGGAAGUCAGGACUGGAACUCAAGCAGGUCAGAAAGCA  
>N1653  
UGCUGCAUGGGGAGGUAAGAACUGAAGAGACAUUUAUCCA  
>N1654  
CAGGCAAGACAAAGUAAAGGACUCAUUGAAUCUGGUUCAAU  
>N1655  
UUUAGUUUUGUGAAACAGAAACUGGGUUUUCUCCUCCACA  
>N1656  
UUCACAACACUGCCAACAAGACUGCCGAGCAGAGGGACAAC  
>N1657  
AAGGAGGACAUGCACUCUGGACUAUUGGGCUCUAGGCUGGU  
>N1658  
CUCUGGGAAGAAAAGAAGAGACUCCUAUACUUUGACCAAGU  
>N1659  
UAACUGAUUUGAAACUUCAGACUCAAAAUCUGAAGAUGUGU  
>N1660  
AUAUCUAUAAAGUGAACUGGACUUUUUCUUUUUUGUGAUGA  
>N1661  
AUAUACUAUUGGCCUAGAAACUAAGGCAUAACUAAAUGUU

>N1662  
AAGCUGAGAAGGUGAGAGAGACUGUCACAGGAAGGUCACGC  
>N1663  
GGGGAAGGCAGGAAAAGAGGACUUGAGAAAUCAGAAUAGCA  
>N1664  
GUGGAUGAACAAAGGAACAAACUGCAAAGAAGACUAUGUGC  
>N1665  
AUCAGUUGGCUGGACCAGGGACUAGAGAGAUGGCUCAGUGG  
>N1666  
CAAAGUAGAGGCAGUGAGGAACUCUGUCUCAAGAAUAAAGG  
>N1667  
UUUCAUUUGUGGUCAUCCAAACUAGAGUUAAGCAAGGUGUC  
>N1668  
CAUAAUGAAGGGAGAAACAGACUUGAAGACUAGUGUAGAAA  
>N1669  
UAUCUGGUCAGUCCUCAAAAACUGUGAUUUCUGAAAAACA  
>N1670  
CCCUCAAAGAAAGAAACCAAACUAUCACUGGCCUUUAAAAU  
>N1671  
AAGCCAUGACCAUCGUGAAAACUGCGCAGGUGCACCAUGAU  
>N1672  
UCAUGAAUUAUACUGGGGAGACUCAGUAAAACUAGGAAAA  
>N1673  
UCCUUCAUCUCCCCCAGAACUCCCAUUAUCAUCUCCUCC  
>N1674  
CUUUGUGAGUUUGUGGCCAGACUUAUUUACACAGAGACCUA  
>N1675  
AGGCACCUGAUGAACAUUAGACUCUCAGCUUUCAUAUACC  
>N1676  
UACUAAUGUGUGUGUAAAGGACUUCCCAUGCACAAGGGCC  
>N1677  
AGCAGCAUAUUCAUCACAGAACUAAAUGAGGUUUUGUUGC  
>N1678  
AGGACCUUCAUUGGACUGGAACUUCUAUAAGUAGGUUGACU  
>N1679  
CAGGGUUUUUACUGCUGUGAACUGUCCCGAAGAGCUGUUGA  
>N1680  
GCCAAAACCAACCAACAAAACUGAACAUCCACUAUUUUCU  
>N1681  
UACAGAAUGGUUUUUAUAGGACUAUUUUGGAUUUAAAGUAU  
>N1682  
CUUGAAGAUGCCCCCUGGGACUUCAUCCAGGUGGAGAGGG  
>N1683  
AUUGUUCUGUUUGGUCUCAACUAACUGACAAUUGUUUUA  
>N1684  
AAUUUUACUAAAUAUAAAGGACUCAUCAUAUUCUAAUUCAU  
>N1685  
CAGUCUUGACAGGGACAAAGACUAGAUGGCUUUUGGAGUCU

>N1686  
AUCUAAAAGAAAGAAGCCAGACUGAGAAAGACACAUAGGCU  
>N1687  
AAAUAACGGGAUUUAUUGGAAACUUUCCAAUAAAUAUAAGAU  
>N1688  
GCCAGAAUUUAAAACAAUAGACUCAAAUAUUGGAGUUUCAG  
>N1689  
UACGAGGAUGUCCUUGUGAAACUCGGUGGCAUUAUGACAAU  
>N1690  
AACGUUGACUUUGGUAAGAGACUACAGUGAUUUUAUAUAAU  
>N1691  
CCAAAAGAAUUUACUUUAAAACUUCUCUAUUUUUUUGGAU  
>N1692  
GUCUGAGCCUCAUUUCAUAAAACUUCAUCAUUCUGUCAGAGA  
>N1693  
GAUUUCAUUUAAAUCUAAAACUCACUGACAAGGAGAGGAG  
>N1694  
AUAGUAGUUUGGAAAAGGGGACUAAGUACACUGAUGC UUUA  
>N1695  
UGGGGAUGGGAGUUUUAGGACUUCAGGGUGACAAGGUGAU  
>N1696  
GCUCACACCACACACACAAAACUCACAGAACUUAACACUGU  
>N1697  
AUGGAUCCUAACACAUGAAAACUGCCUCUCCAGAGCUUCCU  
>N1698  
GUUCUCCUUUACCUUGUGGGACUUUGACACCAGCUAUGGCA  
>N1699  
UGAGCUUUUCCCUGGGCAAGACUGUUUCUCCCAUUCUCAGC  
>N1700  
CCUUAAAAGCAUUUGGAAAACUAAAAAUGUUAGUGAAGUU  
>N1701  
AUGUCUGUUCUUGAGAAGGAACUUGUGCUCAUUAACAUUUU  
>N1702  
AAAGUUAUAGCGUCUACCGAACUCCCCAGCACAGUGUGCGA  
>N1703  
ACACACAAGCUCAGGCACAGACUCCUACUGUCUGCUGCAA  
>N1704  
CUCUACCUCUGUCUGUGGGAACUAAUUCUACACUGCCUGUC  
>N1705  
UCUAUAGUGGGAGCCUAAGAACUGAAAACAAGAUCAUUAAA  
>N1706  
AACUCAUGAGCCUCAGCAGAACUGACACACUCCAAUCUCUA  
>N1707  
UUCCCUCUUUCAGCUGAAGAACUGAUUCAUUUCUUUUGUUA  
>N1708  
AAUUGCGUGAGCUAUUGAAAACUGUGUUCUAAGCACAAACU  
>N1709  
GGUUCUUAUAUAUUGAGAAAACUUUAAUGUUGCUAGGUUUU

>N1710  
AAUAUUGUCCAAAAACAUGGACUAAAGCAAAAUGAAGCCU  
>N1711  
UAGGAAGCUUUCAAAUAUAAAACUGACAUGUUAUAACCAGA  
>N1712  
AGUCUGCUAACUGCAUAUAAAACUGUUGUCUGCAUAAACCUG  
>N1713  
AGUGUUUUUAGAAAGCCAGAACUGGCUCCACCCUCUAUUG  
>N1714  
UCUUUCCCUUCUGUUUUUGGACUGAACAAAUUCAUAGUCU  
>N1715  
UCACUACAUACUUGGGCAAGACUUUAAAAUUGAGGUGGUGG  
>N1716  
CUGUAAAAGAGGCGUUAGAAACUAAGAAAAUCUUUUCauc  
>N1717  
AGGGAGCAGUGUUCGGAGAACUAAUUUCUGUAACAUCAG  
>N1718  
GCAUGGUGGCAAUUUGAGGAACUCCACUGUUGCCAACUACA  
>N1719  
CUAAUGCACAUAGGACAGAGACUAAAAGAAAGCUUCCACA  
>N1720  
AGCCAACAUCAUUGCUGAGGACUCUCUUCAUUUCUCUCAGA  
>N1721  
AUUCCGUACUUAUGUAAGACUGAGCAAUUUAACACUU  
>N1722  
CAUGGAAAAAUGGAUAAGGACUUGAAGUGAUCUCAUAAA  
>N1723  
AGUUUUAGAUCUCAUAAGACUGAGUAGAUCACAAUCCAC  
>N1724  
AAGAUCAUGUUCGUGUUUAGACUAGAAACCAAAGCCACA  
>N1725  
UAAUAUUACAAUCUAGUGGGACUUAUAGUUGUACA  
>N1726  
AUCAUCUUGGUUAAAUCAAACUGAAAAACUAAAUAU  
>N1727  
CACUCAGUUGGCCGCACAAGACUAUGUCACCACAUACAGUA  
>N1728  
GAUCUUCUAAAUCACCAAAACUGUGAUCUGAGCAUAGCU  
>N1729  
AAAUCAAGUCCAUUUUACAAACUACAAAACAUUAGCAGUUC  
>N1730  
GUUAGAAAUGAUGAGGUAGAACUCUGCUUUUUCUACAUCU  
>N1731  
AUAGAUAACCCUAGCUAGACUCACUAGAGGGUACAGGGA  
>N1732  
AGCAUUUUUAUGACAUUGAACUUGGUCUAAGACACAUCAC  
>N1733  
CAUCCUACCAUAGUGCCAAACUGAGGCUGGCUGUAAUGUC

>N1734  
CAAUCCACAGACCCAAGGAAACUAAGAAUAAAAGAAGGCCU  
>N1735  
UGUGGGUGGACAUCUCUGAGACUAUCUGGAGAUCUGGGACU  
>N1736  
GCCCAAGGGGACUCACAAAAACUAAACCACCAAUCAAGAG  
>N1737  
ACAUUUUUUUGAACUGGCAAACUAAAAUAAAAUUGCUUCUA  
>N1738  
UGUAUCCUGUUGCUCUAGAGACUGAAAUUGUCUCCUAGGG  
>N1739  
GAAAACAGGAAGAUUCCAAACUAGACAUCAGUAACUAAU  
>N1740  
GAAGUGACCAUGGAGCGGAGACUCAGUCCCAUGGGACUGU  
>N1741  
CUGUGGCUUUAACUGGAGAAACUCUACCUUGUAAAUUGUU  
>N1742  
UACUCAAUAAAUCCCGCAAACUGAAUCCAAGAACAUCA  
>N1743  
GUACAAAUUUUUAUCCCAAACUUGGACACUAGAAUCAGGA  
>N1744  
CCCUGCUCUAGUCGUUCAGGACUCACAUGAAGCCAAGCU  
>N1745  
CCCAGGAGUGUAUAACUGAAACUUGAGGCAGAAGACUAU  
>N1746  
GGAUUGUAUUGAAUCUGUAGACUGAUCCUGCUAGACGUUUA  
>N1747  
UGCAUUUCAUCAUGUUUGAGACUUUAAAAGAAUUGCACAAGU  
>N1748  
CAUAGAUGUUCAGAAUUGAGACUUUCUCUUGGUGAAUUUUC  
>N1749  
UAUUGGAUAUUAGGAUGGAAACUUCUGCUUGUUUCCUGGGA  
>N1750  
GAAAUUCCCAAACAACUGAGACUAUUGCCAAGACAAUGGU  
>N1751  
AACUAUUUGGAUAUGAGUGAACUUCUUUAGAAAUUGUUCU  
>N1752  
AUGUUUGUGCAGGAAUAGAAACUCUGACUUAGACAAAUUGG  
>N1753  
ACCAGUGUUGC UUUCAUGAAACUAUGUGGCUGAACAUAGACU  
>N1754  
AAACUUUAGGGAUUCAUGGAACUGUUCGUUUCUUUUAUGA  
>N1755  
GCAUUCAAACUUUUUGUUGAACUGCAUCAACCUGCCACCAG  
>N1756  
GUAGGAGCUAGGAACUAUAAACUAUGCAUUAUGUGAUUUGA  
>N1757  
AAGAACAUAUAGUCUAAAAACUGGUGAAAAAAAAAAAAACAC

>N1758  
UGCAUGCCCCACACCACUGGACUCCUAAGAAUUUCACUGAG  
>N1759  
GUAGGUCCCUCUGGGGAAGAACUGGAGAAAGGGUAACAGCA  
>N1760  
AGUUGACCAAAGUGUAAAAGGACUCUGAGUGUGCAGCUAUGG  
>N1761  
AAUUAAGAUUACUACAUAACUAAUGAUUCUACAUAUA  
>N1762  
UUUACAAUGACUAAGACUAGACUUAGAAUGGACAGGGAAUG  
>N1763  
ACACCUGAUAAAAAGAAUAGACUCACUGCCUGGAAACAUUA  
>N1764  
CUGUAAAACGAAUGUCCAAACUUGUCCUUGCAUUAGUCAG  
>N1765  
AUUAUAGUCAUGUAUGGCAGACUACAUAUACUUAUUAGUAGA  
>N1766  
AGAGGUAAAUUUCCUCAGACUCUCACCUACCUUUAGUGC  
>N1767  
ACAGAGGCUUGGAGUAGCAGACUCAAAAUGAGCCUUGAAGU  
>N1768  
UGUUUGGCAGUGAAAGCAGGACUGCUAGCUUGCUUCUGCUC  
>N1769  
GAGCAUACUUUUAUUAGAAAACUGACUCAGAAUGC UUAGAA  
>N1770  
CAUGAAAUACAACCAUGGAAACUUCUUCAGUUUUGGUGGCU  
>N1771  
AUGACUAACUGGAAUCCAGACUUUGGACCAUAAGUCCCU  
>N1772  
ACAAGGGUGCUGGGAAUUGAACUCUGGUUCUCUGCAAAGU  
>N1773  
AUGAUCAGAAAAGAGUGAGAACUACCGAAUCUAUCACAAGU  
>N1774  
CUCAGAUUAUUAUUGAUGAGACUGUUAUCUGCUGUGACUC  
>N1775  
CAAAACAGAGGAAAAGAUAAACUAUUACUGAAAUAUAACA  
>N1776  
CAUCCUCACAAUGUGUGGAACUCAGCUUUGCAGUGUCCCU  
>N1777  
UAUUCAUCACGUAAACAGAAACUGUUGUUUGGGUUAUUUAU  
>N1778  
AGAGAGAAUUAUCAAAGAACUGAAUAACCAUAACCUGAU  
>N1779  
AGAAUUUAAAAAAAAACUGAACUACGAAUUUAUUGAUUCA  
>N1780  
UGCAGAAUUGUUUGUGAAGAACUGGAAUAGAUCUUCUUG  
>N1781  
AAAUCCCCUUAAGGAGGAGACUUUGCAUAUGUUUUACUGC

>N1782  
UGGUAGAAUUAGGAAACAAGACUGCAGUUUGUCUCCUGUGA  
>N1783  
UAAUGUCUAGCAACUGCCAAACUAAACACUUCAUUACAAUC  
>N1784  
UGAAGACCUACUGUGAGAAGACUGUAGUAUCUUUCCCCUGG  
>N1785  
UCAUAAAUGGAGACAUCAGGACUUCAGCAGGUGAUGUUAUC  
>N1786  
CAGAGGCUAGAAGCUCCAGGACUGGACCUAGAAGACAAAGG  
>N1787  
UGACUUCUAGUGGUCAGAGGACUUCUGGGGUUCUGGGUAAAC  
>N1788  
CUCUCACUCACUCCACACAGACUGAUUUUCCACUUUAAAGA  
>N1789  
CUCAUUUCAUUUUUGACUAAACUCUAGUGACAUAUGCAUUU  
>N1790  
UCUACAAAAGAUAAAUACAAACUCUGAUGUUAAUCUUAAAA  
>N1791  
ACUCUGAUUUCAUUCUGAGAACUCACAUCUUUCUCCUAAG  
>N1792  
CAAAGGCAAUUUCCCAAAAACUGUCUCAUAGUACUGUGUA  
>N1793  
GGACCUGAGAAAUGUGGUAAACUUAACAUGCCCAGAGGGCC  
>N1794  
UGCAUACAUUAAUGGAUAGAACUAGAAAUGUUAUCCUGAG  
>N1795  
AGAGACCUGGGACAUGAGAAACUGCAACCUCAGUAGGAAG  
>N1796  
GUGGAAUAGCCUGGAUCCAGACUAUUCUCCCUCCUCACUAU  
>N1797  
ACUGGGGGUGGCAUACUGGGACUUAACACACUGGCUGGAGCU  
>N1798  
CAAUAGUGUUUAUCAUGCAAAACUUAAGAAUGUUUAUUCUAC  
>N1799  
GGUUUAUGGGAAAUA AAAAGACUAUAUUCUAUUCUCCAUGU  
>N1800  
AGUGAUACCUCAGACUGUGAACUAUGCAUGCUUGUAUAAUC  
>N1801  
CUGAGUCAAUUGAUCUUGGAAACUACUUUAUUUGUGAGCAA  
>N1802  
CAUCCAGCAAUAAAGGGGAAACUUGAGGAGUAUAAACAGGC  
>N1803  
UGC UUUCUUCUAGACUUGAACUUCUUC AUGGUA AAUAAUC  
>N1804  
AAGGCACGGUCUCACAGAAAACUUCUUUUCCUCUGACUCU  
>N1805  
CAACACAAAUCUCUCCAAGACUUCUGUUUAUAAGGAGGUA

>N1806  
UGAUUUGUUUAACACACAAAAACUUUAUGAUACAUCUAAGU  
>N1807  
AAUUAUGUCUAGGGUAAACAGACUAAGUGUUUAUCCCCUCCA  
>N1808  
GUAACCAAGGAUGAUUUUGAACUUCUGUUCUCCUCCACAC  
>N1809  
AAAGCUCUUUGGUCACAAGGACUGUUUAAAGCAACAAGAAA  
>N1810  
CUAUUUCUUAUAUUUUCUAAACUUUGGUCACAAUAACCUUC  
>N1811  
GCUGUGCUGGUGCACAAGAGACUGUGGGCACUGUGAGCAGA  
>N1812  
UAUGGUCACCAGUCAGCUAAACUUGAUUAUGCACAGUAGCAA  
>N1813  
UGACCAGCUGUGAACAGUAGACUGUGAACAAAUUGAGACCU  
>N1814  
UUUUCUUAUACAGCAGCAGACUGAGUAAUGAAACCUGAUG  
>N1815  
CAUGAACAGGUAACAUACAAACUUGGAAACUAUUCCAGCU  
>N1816  
CCAGAACCAAGGUAGCCAGAACUCCAGCCCCUUAUAGAGUU  
>N1817  
AAGUAAGAUUAAGGUCAAAAACUAUUAGAAUUAUACCCAAC  
>N1818  
UCUCUGCUUCAUCCAGUAGACUAAAAACAGAAGGAACUCA  
>N1819  
UAGAACCCGAAGUGGUUUAAACUUAAAAUAUUUAUUUAAGA  
>N1820  
UAGGGAGUUUUGGAGAAGAAACUGGGAAGGAGGAUAACAUU  
>N1821  
UUGCCCAGCAAAUUAACCAGACUAUAAAAAUGGGUUUAUUG  
>N1822  
UGAUUAAAAACAUCGUUAAAACUGUUACUAAAUAAAAUAAC  
>N1823  
UGCUGAGUUAAUGAGCAGAACUGGCAUUCACUUUUCUAU  
>N1824  
AUAAAAUAACGCAAAGCAAAAACUGUGUGUGAUCAACAGUA  
>N1825  
CUUUUUCAGAUAAUAAGAAACUAGAAGAAUGCCACUGUUG  
>N1826  
ACAGACAUCCACAAGUGAGAACUUAAUGCCACAGAUAAACU  
>N1827  
GGAAUAUUCUAUCCACUGAACUAGCAUUUCCAGGUUUGAU  
>N1828  
GAAUUCAAACAUCAUUCAGGACUACACACAAUGCUUUCGAU  
>N1829  
AGAAUUUCUGGUUCUCGAAGACUGCAUUAUUAAACUCCUUC



>N1830  
AAAAGAGAGAGCACAACAGACUCGUGUGUGUGUGUGUGUG  
>N1831  
UUACAAAUUGUUUAAAACGGACUUGAAGGGAUUACUGUCAC  
>N1832  
UUUGAAGACCCAUGGUUGAAACUAUAUUCUGAACUAAAAGA  
>N1833  
AAUAACUGCUAGAUCUUGGACUUCCAUUCACAGCUGCGAC  
>N1834  
AAAGUGAGGAGCUAAAGAGAACUCAAAAUUAAGGUCAACGU  
>N1835  
UUAACUCAAAACAUUGCAGAGACUAGUAAUAUUUCUUGAGAC  
>N1836  
AUGAUGAUCUGUUUCCACAAACUGUGACCCAACCGGAACCC  
>N1837  
GUGGGGACAGAUCUUGAAAAACUCAAAACAGCAUUUGCUUG  
>N1838  
UGUAUAUACUUUGAAAAUAGACUAUUGGACUUUCAAGUAU  
>N1839  
CUUUAAGCACUGCUAAUGGAACUAGCUCUAAGGGGAAUUGA  
>N1840  
AGAAUGACAGCUGAGGUGAGACUCUGGUCUGCAUGCAUGCG  
>N1841  
CAUCUUUGGAACUUUCAUGGACUUGGGUUUAAGUGUCUGUC  
>N1842  
CAGCUGCUUCUGAGCAAAGGACUCUUCUUCAAGAACCAUGA  
>N1843  
UAAUUGCCCAGAAUGAUAAGACUUAUAGCAUCUCAUACAUG  
>N1844  
UACUGCUGGGAAGAGCAAAACUGGCUAUUGUCAGGUAAGU  
>N1845  
AGCUCUCAAUCACGCAUAGACUCCAGUGUUUCGGGUCAGU  
>N1846  
ACCUGGAUACACACGAUGGAACUGGGUGCCCACUGAGGGUU  
>N1847  
AUAUCCAGGAAGCUGGCAGGACUGGGCACACAGUAUCUGGG  
>N1848  
GUUGUGCUCUAUAAGAAUAGACUGCAGUAUAGAACACGUUA  
>N1849  
UGAAAACCCCUAGUAAUAAAACUCAGAACCAUGAAUUUGCU  
>N1850  
UUAAAAGAUGCAAAGGAAGACUAUGAAAAGUAGAGAGGAG  
>N1851  
CAUACAAAUUGUACAAAAUAGACUUUAGAGGGAAAGUCAUUU  
>N1852  
UAACGCCAAUGAAGGGAUGGACUUCCCAGCUAAAGCAACAG  
>N1853  
GAUAAAAGUGACACACAAAAACUCAUAGUGAAAAGUCAUUA

>N1854  
AAGCCAUAAAAAGUCCAAAACUUUACUCAGUGGUUAAUGG  
>N1855  
GUUUGUGAUAGCCAUUUUGGACUAGGGUGCAAUGGAAUCUC  
>N1856  
UCCCAAUCCCCCUCAGAAACUCCCUAUUCCAUCCACCCU  
>N1857  
UGCUCAGGGCACUGGCUCAGACUGGAGAACCUGUACCACUG  
>N1858  
CAAGGAACUCAAGGCAGGAGACUGACACAUAGGCCAUGGAG  
>N1859  
CCUGGCUUGCUUAAAAGGGACUGUUUGGCCUCUAUGCCUA  
>N1860  
UGGAUGCCAGAAGAAUAAAGACUCCUACUUAAGGGAAUAGA  
>N1861  
CCAUGUACUGGGUCCAAAAACUCAAAACAAUAAUUUCCA  
>N1862  
AACUUGAAUCAAUUUGAAAAACUACACACGGAAAAGUCAGU  
>N1863  
CAAGUUGCAAUUCGAGAAAACUGUGUUUUGUUUUUGUCAU  
>N1864  
GAGCAACACACCUGCCCUAGACUUUUAAAAGUAAGCUUUCA  
>N1865  
UGGGGCCCUUAUAUGUCAGGACUCAGAUAGUUCUGUUUCUU  
>N1866  
CAUGC UUUGCAGUCCAUGGACUUAGUAAGAUUCUGUAGUC  
>N1867  
UCUUGUGUGUGAAUACAGGAACUUACUUGGUAGGCUCACCA  
>N1868  
GCUUUGAUAAACAUAAAAAACUUUAUAUGAACCAUGAGAA  
>N1869  
AAAAAAUACAACAAAUUAAAACUGUCAAAUAUCUAGAAUGC  
>N1870  
UCGACUGGGCUAUAAGGGAAACUGCAUUGCAUGAAUAGACU  
>N1871  
ACAAUAAAUUUCCAAAGAGGACUACCCAACCCAAGAGGGUG  
>N1872  
CUUAACAUCAGAGAAUGAGACUUUGUCUCCUGCCAAAUU  
>N1873  
AAUUUUAGGGCUUCCCCAAACUACUACCAUUGUAUCUCCU  
>N1874  
CUUAUGAGCAACAAGAAUAGACUCAGUAGGUUGUGUGUGUG  
>N1875  
GGAAAAUAGCUGUAUCAGAAACUGAUGUGAGAGCCAGAGGA  
>N1876  
ACCAUCCAACUCUUUACUAAACUAGCCUUGAUUUUCAAGCC  
>N1877  
UGCCAGCGAAGAAAGAGAGAACUAUUGAAGUGUGAUGUGGU

>N1878  
AAGACAUUACAAUAAGUCAAAACUAUAGAAAUGCCAUCAUGG  
>N1879  
UUAGCACAGCUGAAUCACAGACUGACUGUCAAGGCCAGCG  
>N1880  
AAAGGUGUGUCAGCCGUCGGACUCGAAACUUCGCCUGAUUU  
>N1881  
UGGUUGCGAGUAUCUAUGAGACUGAUAGUUUCUCAAAGCGC  
>N1882  
AGGCAGACCAUGCCAUAUAAAACUUCAAAAUCCAUCAGUU  
>N1883  
CAUUCUGGUAAGUGCUGAAACUUAUUAAAACUCUGUUGAC  
>N1884  
CUGUGGAGGCUCUCCCACAAAACUGUCUAUUCACUCCUCCC  
>N1885  
CAAAGACCACUCUGGCCUGGACUUCCAUUAGCGCCCAAUUC  
>N1886  
AACAAAGGCCUUGAGCCAUGGACUUAUGAGCUCUUAUAAA  
>N1887  
CCAUUCUCCUCUGCAAUAAAACUUGGAUCAUCUUGGGUACC  
>N1888  
CAACCCUCUGACA AUUUGGAAACUGAAUCUGAAAAAAUAAA  
>N1889  
UUUAAAACACAGCGUUUAAAACUCCCCAAACAUCCCAACCA  
>N1890  
GGUGCACUGAAUUUCAUCAGACUUCUGUCCAGAGUUCUCC  
>N1891  
GGCACCCAUUGAUGGGGAAGACUCAUCUGCAUUGUGGGUGU  
>N1892  
CAUGUUGCCUUUCUCAGGAGACUUUGGAGGAGACAGCUCAU  
>N1893  
GAUCCCCCACCACCCAGGACUGCCAGUCUUUGAAGUGCA  
>N1894  
AAGUCAUGCUGUCCAGAGGAACUCCCCAAGAUAAACCAGCUC  
>N1895  
GUAGACCAGAUUGGACUGAAACUCACAAAGAUCAGUUUGCC  
>N1896  
GAUUUUUAUUAUUAAGAAAACUCAAAACCACUGACAACUGC  
>N1897  
AACAGAUUGCACUAGGAUAAAACUUUCAAUCCACCAAAGUCA  
>N1898  
GUAGCAAACUGAAACUCAGACUCAUACGGGGCCUCAACUC  
>N1899  
UGUGUGUGUUUCUGAAAGAAACUCUUGCUGGCCUAGAAUUC  
>N1900  
UUUCUACAAAUAUUUCCAAACUAAAUUUAUCUUAGCUCUA  
>N1901  
CCAGCAGUACUGACGAAAGACUGGAGGGUCCUUGGAAUUU

>N1902  
CACCAUGUAUUUGCAUAGAAACUUGAUACUUCUAAAAGCAU  
>N1903  
UUAUCACCAAUAGCACUAGAACUUGAACCCACAUCUCUGAG  
>N1904  
UGUUCCCAUCUGACCCUCAAAACUUGAACAGUAAAUAAGCCU  
>N1905  
AACUCAUAGUGGUACUAUAAACUAGCCAAGAUGUCAUGACU  
>N1906  
CUCACUAGCAUCCUCUGGAGACUUAUCUGGCUUAUCAGGAAA  
>N1907  
GCAAUAUAGACCCUGAUGAGACUUAUACUUGUCUCUCAUGA  
>N1908  
GCAUGAAAGAGUCCUCAGGAACUCUGAGGAGACAACCUGAG  
>N1909  
UCAUGGGAGUCUAACCCAGAACUUUAGGGUUUGUUUAUCUC  
>N1910  
AACUUCAAGCAAUAUGAAGAAACUGAUACACACAUAACAAAU  
>N1911  
GUGUGUGUGUGUGUGAAGAAACUUGGGGAGAAAUUUAAAUC  
>N1912  
CUAUGCAGGUGAGCGUGCAGACUCGAGAGGCAACAUAUCUU  
>N1913  
AGAAAGUGAACUGAGCACAAACUUAUAUGCAUUCACAGUUU  
>N1914  
UGGAUAUGGGGUUAUUGAAGACUUUUUCCCAAUCUGUAGGU  
>N1915  
CUAUCCAGAAUCCGUAGAGAACUAAAAAUAAAAAAGUAACA  
>N1916  
UAGCUGGGUCUUGAGGUAGAACUCAGUUUCUUAGAUACUGA  
>N1917  
GAUUGGUGGUUGGAUUAGAAACUUUGGAAACCAGUCUGGUA  
>N1918  
AAAAGAAAAGGCAUUUAGAAACUUAUAAAAAAGAUAGCUGU  
>N1919  
GCUUUUUGCUUACAGUUAGAACUGUGAACUCUCAACUUGCU  
>N1920  
CUUCCUAAAAAUUGUUCAAACUAGGUAGUCUAAACAACUC  
>N1921  
CUAAUCCUGGUAAACUCUAGACUCCUCAACCAAAGAAGGUU  
>N1922  
UUUGGAUGACCUGAGUCAGGACUUAACAAACGACCUAGCUAC  
>N1923  
AACUUGACUUCAACUUUGGAACUGGGGUAAUUGGUGAAUUG  
>N1924  
UUAUUUAAAAUAACUUGCAGACUUCAUCUUGUAGGAAUGG  
>N1925  
UAUCAUGAAGGCAUCUCAAAAACUAGAUACAUGAGCUGUACU

>N1926  
GGAAGAAGAAAAUACCUUGAACUGGGAACCAAAAUCAAG  
>N1927  
CAAUUAAAUCUUGCAUUGAACUAUGGUAGCAGGAUCUUA  
>N1928  
AUAAAAUCCAAGUGGGAAGACUGAACCCAGGCAGAGGUAAA  
>N1929  
UCUUACUAAAAGUCACUUUGAACUGCAAUCAGAAACAUAUU  
>N1930  
AGUGCCUAAUUCAAUUAUGGACUUGCUUGCAUAUGUGCAGA  
>N1931  
AGAUCGUGAGUCACAGUUAAACUGCACACUAAAGAAUGGGU  
>N1932  
AUCUUGGAACUCAAGAAGACUUAGCUGGAUUUUAAGCCA  
>N1933  
UAACAAUCACUAGAUCUGAGACUGGGGCCUGCUGACACCU  
>N1934  
AGUGUUAUCUAAAUGAUAAACUUAAAUCUGUCAGGAAAAG  
>N1935  
AUCGAGGUUGUUACUUAAGAACUAAAAGAGCAUGAACUAUU  
>N1936  
GUCUGACAGCCACUUUGAGAACUCUGGUCCAGACCAUUUGG  
>N1937  
CACCACCGACAGUGGGUAGAACUUCUGCCUCCAUUUUUA  
>N1938  
CACCAGUCUUAUUAAGAAAAACUUUUUCAUGUUCAUGUGUU  
>N1939  
UAUCCAGCUACUUCACUGAAACUGUUUAUCGGGUUAGGAG  
>N1940  
UGACACACAGCAGCCAUAAGACUUUGCUUUCUGAAAUAUAA  
>N1941  
UGCUAAAAGUCUAAUUAGAACUCAUUCUAAUCCACUAAA  
>N1942  
CUGUUCUUGCUCUGGAUGGAACUGAAGGAGGAGGAAAAGGU  
>N1943  
CAAGCUCACUGCUCUGGACUCUACUCAUGCAACUGCAU  
>N1944  
AGCAGACAGUCUGGGGAGAACUCUGCCCUGCCGCUAUACU  
>N1945  
UAAGCCAUGUUUUAACAAAACUAUAAAUCCAAGCUCAUGA  
>N1946  
AGAUUCAACUCAAGAAAAACUGUGUUCUUCAUAAAAGAU  
>N1947  
UCUUGUUGUAUAAUGCUCAAACUAACCUGUAGAAUGUCUCA  
>N1948  
UUUAGAGGAGAAGCCUGUGGACUUUUGGAAGAAGCUUCCAG  
>N1949  
UUUCCUUGUUGAGGGUGAAGACUACACUUGUCCAUAAGGAAU

>N1950  
GACUGAGAACUGACAGCCAGACUGUAAAUGCUUUCAGUGC  
>N1951  
UGAUCUGUAUUUUUAAAAAACUAUCAACUUCUUGCCUCU  
>N1952  
AUACCUGCUGGGAACAGGAAACUGAGUUCUCUCAAUGGGG  
>N1953  
CCCUAUGUUUAUAGAGCAGAGACUGUAGUGCAGAUCUGUAUC  
>N1954  
GUCACUCCACCCUCUCCUAAACUUAACAUAGGAGAACACCAU  
>N1955  
AAUCGGGGCUUUUAUAGUGAGACUAUGUCUCAAUAAUAAAGG  
>N1956  
AUGAGGGAGAAGAGAGGCAGACUCCGCUAGGAUUGUUAGAA  
>N1957  
CAAGCCUUGAAGAGCUGAGGACUGAAUAAGUAAUACUGCC  
>N1958  
CCAUGCAGAACUGAGACCAGACUAUGGUGAGAAGGAAUUGA  
>N1959  
UACUUCUGAUGGAAGUGAAAACUUUUUCAGCCACUAUGGGA  
>N1960  
AGAUGGGAACAGAGACAGAGACUGAGAGACCUUGGAACACU  
>N1961  
CACAGAAGAAAGAGUCAGAAAACUGAUAAGCUUCCAUCAGUA  
>N1962  
UCUCCAGCUCCCACUGAGAGACUAUUAGCCAACUAAAUAUA  
>N1963  
CACGGUCUUAAAGACCAUAAACUUUAGAGCCCGGCCUUGUA  
>N1964  
AUUCACAGCUAGGCUAACAAACUCUUGAGGACACAGCUUUA  
>N1965  
GAGGCAGGGCAGGGAGGGGACUUUGAUCGAGUUGUAAAGU  
>N1966  
ACUCCACAUAGGUGUUAGGAACUGCACUCAGACCCUCAGCA  
>N1967  
GCCCUAGCCAGGAAAGACGGACUCUCUCUGCAGAGCUGUAA  
>N1968  
AGCUCAGGGCUCAGUGAGAGACUGGUGAAUAAGAUUGAGAA  
>N1969  
AGUUUAUUUCUAUUUGUAAAACUAGCUUAGAAAUGGUGACU  
>N1970  
GUAGAACAUAUAAUGGUCAGAACUACUCCACGUGCAGACCG  
>N1971  
ACUGGCGACCACGGUACUAAACUUGGCUCAACCAUGCAGCA  
>N1972  
UUCUCUCCAGUUAAGUUGGACUCCAGGAGAAAUAUUUUUAU  
>N1973  
UACCUCUGCCCCCAGCUUAGACUCUCUCCCUUAUCCUCCCA

>N1974  
GAACUGUGGAGAAGCACUGGACUUGGGAAAACAUAGAUUUU  
>N1975  
GAGAGAGAGAUAUUACAAAGACUUCUUCUGGUGACUAUUU  
>N1976  
CAUACCUGAACAGACAUGGGACUGUUGUCUUCAUGUCCCAU  
>N1977  
GUCUACUGACGUUCCCACGGACUGAGGAGAAAAGGCUCACA  
>N1978  
UUCGCAUGAGUAGCAGAUGGACUCCAAAGUCUGGUAACCAU  
>N1979  
UAUGAACAUUUUCAGGGCAGACUGAGUUUGGGCUGUGAGUG  
>N1980  
AUGAGGCAGUCUCACAGAGACUUCCCAGUACCCUGGUUCU  
>N1981  
AGACAUCAAAGUCGGAGGGAACUCCCUGAGAAGGUUCCAGA  
>N1982  
AUGUUAUGUGAAGGUAUGAAACUGUCACACAAUAAAAACAA  
>N1983  
CAUGUGUCUUUUAUCCUGGACUGAAUGAUCAAGGUGGGGU  
>N1984  
ACCUGGCUUGAGAAUUUGAAACUGCAAAGCCCACCCCAGAG  
>N1985  
CUGCAAAGCCCACCCCAGAGACUCAUUUCCUCCAACAAGAU  
>N1986  
CAAGUCACCAACCUUAGGGGACUGAUUUAGCCCCACACAUU  
>N1987  
UUUCGUGGUACUCCGAGAGAACUCUCACUAAGCAUGUUCAG  
>N1988  
UCCCACUCUGACAACAAUGGACUGAACCUCUGUAAGCCACC  
>N1989  
AGCUCCUAUAGCCAUGCAGGACUCCCAGUAGAGGAGUAAGG  
>N1990  
CUCCCAGUAGAGGAGUAAGGACUCUAACCCACCCACAAAAC  
>N1991  
ACAAGGGCACAAGGAACUGAACUGGGAGUCCUCUGUAAGGGC  
>N1992  
AAGGCAGGAGCUCAAGCAGGACUUGACGACUUGCUCGCCAU  
>N1993  
AACAGUCCUGUGCAGUAGGGACUGCUCUGAAUUUAGAGAAC  
>N1994  
GGAAAGUGACAUAUGUAGAAACUAAUGUGCUGGAGGGUGGU  
>N1995  
GGCCUCAUUUAAAACAGAGACUUAGGGGCUGGAGGGAUGG  
>N1996  
UGCCAGUAUGCCACAUAAGAACUCUACCAACUGAAGGGCAU  
>N1997  
AGAGUGAUGCACAAUCUAGAACUCGUUCCAUUCUGGAACUU

>N1998  
ACUCAUAAGCAUGCCUAGAGACUAAUCUAACAUAACCAUC  
>N1999  
UGUCACUUUACAGGAGGCAGACUGUAACUCCAAAUAGGACA  
>N2000  
CCAUUCCCCUGCCGAGCAAACUGCAAUACUGUGUGUACUG  
>N2001  
AUAAGAUUACGAUUCUAUAAACUUGUACCAGCACAAACAUU  
>N2002  
CUACCAACCCACAGUUCAGACUAUUCCAGAAAGACAUCU  
>N2003  
AGUUGAAUCUCAAGUUCAAGACUGACCUGGGUACACAGUG  
>N2004  
AGGGCAUAGGAUCCCUGGAAACUGGGGUUGUAGGUGGUUGU  
>N2005  
UGUGGGACUCCUGGGAUCAAAACUUGGGUUGUCAGGUUUGGU  
>N2006  
CUGUUUGUCUCUAUUAAGGAACUAACAAUAACCUAACGUGU  
>N2007  
AACCCCCUGUAACUCCAGGGACUCCUUUGGCUUUUGCCAGG  
>N2008  
UCCUCUCAGCCAACCUUUGGACUGAGCACAGGGUCCCAAU  
>N2009  
UUUUGUUCAAAAAGCCAAAACUCAUCCAGCUCUCAAACC  
>N2010  
CUGAAAAAAAUUUAGAUGGACUCUUACUGUGCAUUGAACU  
>N2011  
CAGUAGAUUUGUUUAGAAAACUUUUUACUAAUGCAAAAUU  
>N2012  
AAGAGUUAGAAAGGAUGUAGACUGACUUGUAAAGAGUUAGG  
>N2013  
AAUAAUAAAGCAAGCUCAAAACUAUUGUAAUGAGCCUUUUU  
>N2014  
UUAGCACUAUAAAUAUUAGGACUGACUUCAUUGCUCUCAU  
>N2015  
CACUUAACUCCAGUGUUUAAACUGUUUAGAUUUUGUUCAGA  
>N2016  
GGCUGGGUUGACUAGCGGGAACUGUAUUCUCAGAAAGAUAA  
>N2017  
GCUUUAGGAUACUCUAGUAGACUUUGUAAAUUUAUUUUUA  
>N2018  
AUUUUAUGAAAAUUUAUAAAACUUAGAAUAUAGGUACAUG  
>N2019  
AAUUUAAGCAUAUCUCCGGACUUCUGAACUGCAUAUGAAU  
>N2020  
AAAGUUUAUGAUCCCUGUGGACUGCCAUGUGGUUGCUGGGA  
>N2021  
UUUGCAAAGCAGUGCAGAAAACUAUAAUCAAAUGUGACAUG



>N2022  
UAGUGGCACUGAGGAAAUGGACUCAUGAGAUCUCCUAGAUC  
>N2023  
UUAUUUUUUUUUUAAAAGGACUUUAAGGUUGGAAAUCUAC  
>N2024  
AAUCUAACCUGCAAGCUAGGACUUUAAUACUCUGGCGUGUA  
>N2025  
AUAAAAAUUGCUGACUUUGGACUAGCAACGCAGUUGAAUUA  
>N2026  
GGCAGCCUACUUGACAGAAGACUUUUGGUUGGUCAACCACU  
>N2027  
CAUAAAGAUUGAAGGACAGAACUUACUCCAAAUUUCAUUUU  
>N2028  
UGGUUUGGUGUAAAUACAGGACUGUCUGUCUGGUGGCCAUG  
>N2029  
GUUGACUCUUUUCAGAAUGGACUUAGGGAAAUAGAAUAAUU  
>N2030  
UUCACUGUUGAGUUCAUGGGACUCCAGUAAAGUAUGAUUG  
>N2031  
AAAAUAAUUACAUGACAAAACUCAAUUUUAUCAUGCAUUC  
>N2032  
CAGAUCACUUAAUUUCAGAACUUGAGAGGCAGAGACAGAU  
>N2033  
UUGAAAAAAAACAAAACAAAACUAGUGUCCUCCUGCUAA  
>N2034  
CACAAGGGCUACAAUGUGAAACUGCUGUGACCUUUGUGAAG  
>N2035  
CCGGCUCCUCACUUGAGGGGACUGAAGGUCGGGUCUGAGGA  
>N2036  
GUUUUACUAAAAAUUGGGGACUUAGGUUUUUGUCCCCCA  
>N2037  
CCUGGCUGGGCUGUCCUAGAACUCACUUUGUAGACCAGGCU  
>N2038  
UAAUAAGUCCAUUUCUAAAACUUGCUAGAAGUUUGGCAUG  
>N2039  
UUUUAGCUUGUUAGUUUAGAACUGGGCAUGAUGAUACACAC  
>N2040  
ACAGAAAAGAAUUUGCAUGAACUAAUAAAUGUUUACAUA  
>N2041  
UGCUGAACCGGAUGUGAGACUGGGAAAGGAUGACACAGG  
>N2042  
AAUUUGAGAUACUGGACUAGACUGCUUAAAUUUCCGGCAG  
>N2043  
ACACAGAUCAUGCCAUAUAGACUUCCAAUCUAGAUACUGUU  
>N2044  
UGAAAGCAUGCCUCUCAGAGACUCACAUAAAUUUCUUUAUA  
>N2045  
UCUCAAGGGAAGUAAUAUGAACUAACUUACUUGAGGAUGCC

>N2046  
GCCUGAACCAACAAACCUAAAACUAUACACCAAUGGGUCUAU  
>N2047  
AUACACUAUAAAAAGAAAGAACUAUAUCAUUUAGACAUUCA  
>N2048  
UGUCUAGCUAAUACUACAGAACUAUGUGGCUAUCAUCCUU  
>N2049  
UGGUAACAGGAUCCCAGGAACUGGAGUUGUGCAUGAUCAU  
>N2050  
UCAUCAGGGCAGCAGAAAAGACUUGGAACUGAACUGCAACC  
>N2051  
AUUAGGAUGAACUCUGUGAAACUAUGUGAAAGCUAAAAUUC  
>N2052  
AGUGGGGUCUUUCAAUGGACUGUGAUCAAUUUGAUGGA  
>N2053  
UUGAUUCAGAAUAAUAGAAACUAUUGGUUUUUAAUAGAA  
>N2054  
GCUCGCCAGAGAUCCUUCAGACUGGCUGGAGCGCCGCGUUG  
>N2055  
UUUAAAACUCAGUUUUCUAGACUUUAAAACGUUCAAAGUG  
>N2056  
CUUCUUGUUUCCUAAGAAAACUGAAUAGGGUGGGCUACAG  
>N2057  
GCUAGUCCUUUAUACUCUAGACUCACUUUUAAAUUGUAUAG  
>N2058  
UUUAAAUCAAUUCUUUGUGAACUUUGUGCACCAUAGUCCCA  
>N2059  
CCAAGUUAGUCAAAAUUAAAACUAUAUCCAUUGUGAUAAAU  
>N2060  
GAAGGUAUGAAAAAAAAAAGACUAAAACUUCUGUAUAUUUAU  
>N2061  
GUUGCCAAAUGAGUGGAUGAACUCAUGUCCUCUUUCUCAG  
>N2062  
UCAGACUUGUUCAAACUGAACUUCUUAUUCUCCUAUACUU  
>N2063  
GUGGUGACUUUUGAAGUCAGACUGAAUUUAUUUUGCUUUUAU  
>N2064  
GUUCAAUUGUUCAGGUUGAAGACUUCACAGUUUUGGUCCUCA  
>N2065  
GUAUAGGUCCUGAGGAUUGAACUCAGUCCUUAGGCAUGUC  
>N2066  
GUUCGGGAUGGUAGCAUGGAACUGUAAGUCAAAUAAAUCCC  
>N2067  
UUGCAGGAUGAGGAGACUGAACUUGGCUUGCUUGGAUUACU  
>N2068  
UAACAAAUACCUAGUCCCAAACUGUACAUGUCAGAGAACUC  
>N2069  
AGAUUUUCAUGAUAAAAAGAACUGCUAGUGAGAUGGCUAAC

>N2070  
GUGGGAAGGCAUCACACUGGACUGUGCUUUGAUUUGGCAGG  
>N2071  
AUUAGAUUAUUCACUGGGAAACUUGUUGAAACAGGGCUCCU  
>N2072  
UGAAGAGAAUGCUCACACAAACUCACCCAUAGAUAGGCCCU  
>N2073  
UUUUGAACUUUUGACAUUGAACUUUGAAAACAGGCACAAGA  
>N2074  
AUGAAAAGAAAUAUAUAAACUGACUAUGAAUCUUAAGUG  
>N2075  
UUGCCUACAGAUAAAGGUAGGACUGUUUUUCCUGUCUUGUUU  
>N2076  
UAGUGCACACAGGUGAGAGGACUGGGCUACUGAAUACACUA  
>N2077  
GCUGUUUUUUUCAUAUUGGGACUAUCAGUUUAACUACCAA  
>N2078  
AUUUUCCAUCUAGAAAUAAAACUUAGGCUAAGUGAAUUAAC  
>N2079  
CCCUACUCCCUUUGUGCAGAACUCUACCUGCUUUGUAGAGA  
>N2080  
UGUCCCCUCCCAUGCACAGACUUCUGAGGGCGCCAUCUAC  
>N2081  
AUGUUGCAACUCUUGC UAAAACUGCAGGUUAUAAA UAAA  
>N2082  
GUAGAUGAAGAUGGCCAUGAACUUGCAUACCAGCAAGCACA  
>N2083  
UGUAACCAGGCUGUCUCAAACUCAGAAAUCCACCUGCCUU  
>N2084  
CUGUGGCUCAGGACCAAGAAACUGACAUAGAGAAUGUGUAG  
>N2085  
CACCUCAGAUACGCUUUAGGACUCAGACUUGUUUAGGAUCC  
>N2086  
AUGAGUAAAAGUGUUAGUAAACUGACCCAAUUGUCCUUAAG  
>N2087  
ACAUAUCAUGACUGGAAGAGACUGAGUUCGAGACUAGCCUG  
>N2088  
UGCCAGUUAUCUCUCUUGGAACUGGGUUCAUCCCUGUUAC  
>N2089  
CACUCUAGAAGGUGAUGGAAACUUUAAGAGGUGGGGCCUAG  
>N2090  
CUCAUAAUAAAUCCAAAGGGACUAGGCCAACAAUCACAUAU  
>N2091  
CAUUUAGUUUUGAAGGGUGAACUAAA UUCUAGUUGGGAUC  
>N2092  
CUGAGAAAGUAUUCUAGCAAACUAGUAUUCUAGAAGGUUAU  
>N2093  
AAAGGGAUUCUUAACUUGGACUUUAUGAAGAUCUCAAUG

>N2094  
AAAAGAUAAACAGAUUAACAGACUGGCUACAUAAGAGGACC  
>N2095  
AUAGUAGUCUCCUUAUCUGGACUCCCUUUUCCCUCCUGCUU  
>N2096  
CCUAUAGUAAAUCAUCCAGACUCAGAUCGAAAACAAGACU  
>N2097  
UCAUUGGAAGAUAAAGAGGAGACUCUUUGAAUUGCUGUGCCA  
>N2098  
ACACUCCUGAAACGCCUGGACUUUAGAUGCUGUUCAGUAU  
>N2099  
GAACUCGUUUAAUUUUCAGAGACUUAGGGAGUGUGAUUAUUU  
>N2100  
AGGGAGGAGGGAACCCCGGGACUGAAGUUCAUUCGUAAGAG  
>N2101  
CUCUGUCACUGUGUGGGGAGACUUCAUUAUCCAUUUGAUG  
>N2102  
UGUAUGUUAUGUAUGGUAGAACUCUGUGGUAUGUAUGUGUG  
>N2103  
UACAUGAAAGAUGGGACAAGACUGUGGAGCUAUUUUGGAUA  
>N2104  
CAGAAAUUUUAUUGCAUAAACUAGCUGUUCUUUACUUUCU  
>N2105  
AAUCUUUUUCACAGUCCAGACUUUAUCCACUCCUGUUCA  
>N2106  
UGCACAGCCCAGAGGGUUGAACUUUUUUUUUUUUUCCUUU  
>N2107  
UGGACUGGCACACAGCAGGGACUGGUCAGGACAAUAGGGG  
>N2108  
CCCAGCCUGCCUUUGGGGAGACUUGCUCACCGGAGAGUUA  
>N2109  
CUAUGUGUCAUUGGACAUAAACUCUGAUUUGGAGCAGGUCC  
>N2110  
UCUCUGCCAAAGAUGUACAAACUCCCUCAUUCCACUGCAG  
>N2111  
AUCCAAGUCAGGAGAAAGGAACUCUGGGUCCACUGAAUACC  
>N2112  
AGUGGCAGAGCCAAGGUUAGACUGAGCAUCCAGCAGCCCA  
>N2113  
CCUGACUGGUCAUAGCAUAGACUUCUUUUCUGCAAACUGAA  
>N2114  
AUUGUCUCUCAAUGGGUGAAACUCUCCUGGCAAUUGCUA  
>N2115  
UAUUCUAUCACUGCAUAAAACUGGUUGUGCUGGUGCACAC  
>N2116  
CUGUCUCCUGUUAUGGUAGACUUUCUCAGCAACCUGCACU  
>N2117  
CCAUGAGUUACUCUAGAAAGACUGGGGGUGACUCAAUUGU

>N2118  
CUUUCUCUGAAGCACAAAAGACUCCCCAGACAUUAUAUAAA  
>N2119  
CUAUUAAUGUAAUAAUAAAAACUACCCAUGCAGUCUAGGUA  
>N2120  
CUUUUUUCUUUUGAAAAGGAACUAUACCUUUAAGAUAAA  
>N2121  
AAACUAAGGAAAUCUUAGAACUUGCCAUGUAGACCCGACC  
>N2122  
GCUUACAUCUUGAAAUGAAAACUAUGAAGAAAAUAGUAUUG  
>N2123  
UAGAAUCCCCUGCACCCAGAACUGCAGCUCUGGACUGACCU  
>N2124  
CCUCCAUUCCAAGAUGGAGACUUCAAGUGAGCUCGAAGGC  
>N2125  
CCAUGGCACCAGACAGAAGAACUGGUAAGUUUGACCAGGUU  
>N2126  
UUCUUUUACCAAUGUACAAAACUGAUUGGUUAUAAGAAAA  
>N2127  
GCCACAUUGCUACUCAUGAGACUCAAUUCUCAAAGACCACU  
>N2128  
UUUCGUCCAUCUCACGGAGAACUCACUGCUACCGUUGCAGA  
>N2129  
GUUGAUGGGCGUGCACCUAGACUGGUUCCAUUUCUCAGCCA  
>N2130  
UUGGAAAUUCCCAUACAGAACUGGAAACUUCGCAUGCCA  
>N2131  
CCCUUCGCUCUCAGUGGGGAACUUCACACUCCAGUAAUA  
>N2132  
UGUCCUGCGGCUACAGUGAGACUUGAGUAAGGGAAAAGCAU  
>N2133  
GGGACAUUGUCUCGUGACAGACUGCACCUAGUCAUCCAGCU  
>N2134  
AAACAGAUCUUAUUUAUUAGACUGCCAUGGGAAGAGGGGU  
>N2135  
CUGUCAAGUUGAUGAUAUGAACUAUUGAACUGAAUUCUUA  
>N2136  
CUCAGCAGCCAACCCAGCGAACUUCUUCUCAAGUCUUUGG  
>N2137  
AACUCUUCAUUUACAUA AAAACUGUUACCAAUCUGUUGUA  
>N2138  
CCCAGGUAAUAAAUGCUAGGAACUGAACCCAGGUAAUAAAUGC  
>N2139  
GUGACCAGUGGCUGUAAAAGACUCACUUGAGGCUUGCAGUA  
>N2140  
UCCAAGCCAACCCCGCUAAACUCUGCUUUA AAACACUCA  
>N2141  
CCCCACAACUGGCAAUGAGAACUGAAGGAGUCCCACCUCG

>N2142  
AACUACACACUUAGAUUAUAAAACUUAUUGUACAUACAAGCUA  
>N2143  
CCAAAAAUUAAAAUAAAAAACUCUGAGGUCUGAGGUUAGA  
>N2144  
UUGUACACCAUGUACCCUAAAACUCUUGAGUGUCCUAGUUUG  
>N2145  
CAGCUUAAGUCUUCUGAGGGACUCUGGAUAACAUAUCAAU  
>N2146  
AAUCCUUAUAUAUGCCAGGACUUCUCUGGGAAUCUCCAAG  
>N2147  
GUAGAGUCUGGUCUUAGAAGACUUAGACUGCAGAAAGAGCA  
>N2148  
AAAGGAAAAAAGAAAACAAAACUCUGAGUGUCAAAGAUUCU  
>N2149  
GUCCUUUUACUUGUGGCCAAACUCCUGGGGGCUCUCCCAU  
>N2150  
AGCAUUAGACAGCUCUUUGAACUUAUUAUAAAAGAUAGUGACU  
>N2151  
CACAAAAAAGGUAGAGAGAACUAAUUUUACAAAAAUGAUC  
>N2152  
AUUAAGACUGCCUCAAAGACUAAAGACUAUGUAUAUAGU  
>N2153  
AGCUAUACCCUCAGUCAUAAAACUGAGGAUGUGGGAUGAAAA  
>N2154  
AGCACAGAGGAAAGCAGGAGACUAAUUUUUAGGUAAGAGG  
>N2155  
GAGGUCAGAGGACAUCUUGGACUGGUCCUCACAUUCCAUC  
>N2156  
AAUGCCAAAAACCUGCCAGAACUUAAGCAAUUAACAACUGAA  
>N2157  
ACAGAGACUUUAAAGAAAAAACUGGACAUAGACUACAAUGG  
>N2158  
UGACAGAUCUGUCUAAAAACUUAUGUGGGGAAAAAUGG  
>N2159  
GGGUGUGUCCUACUCAAUGGACUCACAGUGCAGGACUUCCC  
>N2160  
UCCCCGAGGUGCUAAGUCAAAACUCGCAGUCUCAAGCAUGCC  
>N2161  
CCACAUGGUGGAAGGAAAGAACUGACUCCUUAAGUUGUCA  
>N2162  
UGAAAGAUUAAAUCUCUGGACUUGGCAGAGAUCAUCGACC  
>N2163  
GCAGCUAGUGCAUUUCAAGGACUUCUGAAGUUACUUGGUG  
>N2164  
AACUGUUAUUGAGGAAAGAGACUUUUAGAUGUCAUCUUUCU  
>N2165  
AAAGUACCUAUUAUCAUGAACUUAAAAACGGAUUGCAGAU

>N2166  
CGCGGGCGGGGGGAAGGGACUGGGUACGCCGGGGCACGA  
>N2167  
GGUGAUCCACAGUUCCAGAACUGUCUGGGGGCGGGAGCGC  
>N2168  
GUGCCUAUCAAGCUAAUGAACUCAUUUCAAGACAGAAUAA  
>N2169  
GAGUUGCUGUGUUGGUAAAGACUGUGUUUAGCUCAUGCCA  
>N2170  
GAACUGAGGUGAGCUGAAGGACUGGCCAGGUAGGCUAGGCU  
>N2171  
GAUUUGGGCUGUCUGGCUGAACUGUGGCCGUUGCUGUUGAA  
>N2172  
CUGCAGGCUGCGCGCUGAGGACUCUUCUCGCCUUCUCCCCU  
>N2173  
GCAGUUUUGUGAUUUAGAAAACUGUCCUGACGUACUUUUCU  
>N2174  
GCGGCUGUCUGUUCGAUGAACUCUGUUGGACUCCAGUAGG  
>N2175  
CGUAUGUAUGACAUUUCAAACUAAGUCUUAACUUCUCAAG  
>N2176  
UCAAAAUGUAGGCUAGUUGAACUUUUGUAAAGUUGCCUGGA  
>N2177  
CUCAAGCUGUGCUGAAAUGAACUCCUGCUUCCUCUAAUAG  
>N2178  
CAACAAUGCCUAAUAUUAAGACUAAUGUUUUGACACUUUAA  
>N2179  
GGGCAGGAUAUGAUUAUUAAGACUCAUGAAGGUGGCUGAUGA  
>N2180  
AAGUGAAAUAACUGAAUGAACUUUAUUAAGGAAUUAAA  
>N2181  
AAAGAAUUUGGAGACUACAGACUGUCCCAAUUUGCAUAUUU  
>N2182  
UAGGAGCCUUAAGUCUAGAAACUGUUUGCUUUUAUAAAGCC  
>N2183  
UGGGGGGGGGGAGAGUAAAACUAUUUUUGCAUCUGAAUCU  
>N2184  
AUAGAAUAAAACAAUGUAAAACUGAAUCAUUAUAGUGGGA  
>N2185  
UCACUAUUCAAUAACUAGGAACUGCCUAGUCUAUCUGUGUU  
>N2186  
UUUUAAAAUUACUUGAAUAAACUCAAAUUUAUCAUAAUA  
>N2187  
UGUGACACACAACUGCAAAAACUUGUGGGACUGGGAGUGAC  
>N2188  
ACAGAACACAAUCAACAAAAACUAGGGCACCUCCAAAGUAC  
>N2189  
AUUCAAAAAAAGAAAAAAAACUUUACUAAAGCUCAAAGCA

>N2190  
CAAUGC UUAGUAUUUCUGAAACUAGAAUGGGACAAGAGAAU  
>N2191  
AACCCACAAAUAACAUA AAAACUAAUCAUCUGAUCAGUAAG  
>N2192  
AAUGAAAAAGCAUGCAAGAAACUAAUUUUUAUGUUUUUUACU  
>N2193  
AAAAAAUAAGGCAGAGAAGGACUGAGGCAGACAACCAAUGU  
>N2194  
AGAAGGACUGAAGCACCCAAACUUUGGUCUCCUUCUUGAG  
>N2195  
GUAAAAUUGUUCUGGCAAGAACUUCAAGUACUAUAUUGGAU  
>N2196  
UCCACUAAAAAAUAGCCAAAACUCUUAUCAGUUUUAUCAGU  
>N2197  
AGGAGACUGUGCAGGUAAAAACUAAAUAAGCAUGACUAGGA  
>N2198  
UAUAUGCUUAAAUCAAGAGGACUGACAGAAGGUGUCUUUUG  
>N2199  
UACUUGGCAUGAGUGUCUAGACUCUAAAUGCAUUAUAUAAU  
>N2200  
GAGCCUUUUGAAUUCUGUGGACUGUAUUUUUUUUUUUUUUU  
>N2201  
ACAGUUUAGCCUGGUCACAAACUCAGAGAGCUCUGCCUGCC  
>N2202  
UGAACAAACUUCAGAAUUAACUAUACCAUAGAUCAAAUGG  
>N2203  
GUUGCCUCCUCACUGAAUGAACUCAUGGCUGAUGUACAUAU  
>N2204  
AUAUCCUGGCUGUCCUGGAACUCACUUUUUAGACCAGCUG  
>N2205  
GGCUUUUUUGGUGACAUCAGACUUUGACCUUAGCAGCAGAG  
>N2206  
GCACUAGGCUUUUAGUAUAAACUAAAACCAACCCACUGGCU  
>N2207  
AGAAAGAAUAUUUAAUAAGACUUCUCCUUUGAUAAAAUU  
>N2208  
AUACAUUCAAAUUUCUAGGACUAUUUAUAAACAAAGAAAG  
>N2209  
AAUGCAAGUACAUAUAAAAGGACUAUAACAAUAAAGCAGAAA  
>N2210  
GUCUCCUGGCUGUCCUGAAACUCUCUAUGUAGCUCAGGCU  
>N2211  
AUAGAGUGAAUUCAGCAGAAACUUUUGACUUGCACUCCUA  
>N2212  
AGUACUGGAUUAAAAGGAGAACUGAAGCUAGUGUUUAUUAUAG  
>N2213  
CAAUCUGCAAAACACAUGAAACUCAAGAAGGAAGACCAAAG



>N2214  
AAAGCAGUCACUAGGAAGAGACUCGAAAUAUAUGAAAAUUG  
>N2215  
GAGAAGUGAUUAAUUUUAAAACUGCCAAGUAUGUAUAGCAA  
>N2216  
CAUAGGUCAACAUCUUUUAAAACUAACGACCUGAGCAAUGCC  
>N2217  
AUUACGAUUAUUUCUUAUAAAACUUUCAUGAAAAGUAGGAAA  
>N2218  
AGGGAAGGUUUAGUUAGAAGACUGAGGAAGCACAGUAGUGU  
>N2219  
AGAAGUUAUGAAACAAAUGGACUUAACAGAUUUCUACAGAA  
>N2220  
GCACAAUCAGAAGCUCUAGAACUAAAGGAAGCAAUUCACG  
>N2221  
GGUCAAGGACACCACUAGAAAACUCUACAGCUUGGGCCCAUA  
>N2222  
CAUAAUUUUAAAUAUGAAAACUCUUAACUUAUCAUUACAC  
>N2223  
UUUCUGAGAUGACAUCUAGAACUAAUUUGUUCAUGUAUUUUC  
>N2224  
UGCUGAUACAUCUAUUAAGGACUCUAUGAAGGCAUUUUCAC  
>N2225  
GUUGGAAUGUUGCUGUAGUAAAACUGAUAGCUAAAUUGAAC  
>N2226  
GAAAAGCAUAAAACUCCAGACUGGAAAUAAGGAGACCACU  
>N2227  
UUUGUAGGUAAAUGGAUGGGACUAGAAAUAUCAUAUUGAG  
>N2228  
UGGGCUUGUCUGGAUUAAGGACUAGUCUCCUAAACUGCCAG  
>N2229  
AGACCAAUUCACUUCAUAAAACUUUUUAUAAAUACCACUAAU  
>N2230  
AUGAUAGACUCUGGUUAUAGAACUAUGAGCUGAACUAAACUC  
>N2231  
GUGCUCACAGAUAAAGCCAGACUAAGAAAGAAAGAGAUAAU  
>N2232  
AUCCAAGAGUUUUACAGUAGACUAAGCGAGUAUUAUUCAAA  
>N2233  
AAUCUCAGAAGAGACCUUGAACUUUGGACUUUUAAACAUUGU  
>N2234  
GUCCUUGCGGGUGUCUGGAGACUCCGCAGGCAAGGCACCCC  
>N2235  
AGAGUUCAUUUUGGGGGCAGACUGCCAGAUUAAAGGUGGUG  
>N2236  
UUCUUCUCACAUAGGUCUGAACUGAGAUGCAGCAUUGAGAGA  
>N2237  
UGUUUAUGCUGACAUAACAAAACUUCUCUGUUGAAUCUUCUC

>N2238  
AAGUAUGUAAGUCCUGAAAGACUUGAUAGAACACGAAUUUU  
>N2239  
GAAUUGAUUUGUUUCAUGGACUUCUGGUCUCCCCUCUGUU  
>N2240  
UGAGUGAAAUAAAACUUGGAACUUUAAAUUUGGUAGCAGCA  
>N2241  
UGGGGAAUGCAACAAAUAAGACUUC CAGUGCCAGAAAUGGG  
>N2242  
AUCCUCCCUGAAAUAACAAACUCUUUAAUCCCCAAACUUU  
>N2243  
CUUAUGCACAUGGGUGCAGAACUGCUUACUCAAGUAGCAAU  
>N2244  
AGUAAAGGCCUGGACUAAGGACUCUCGCCUGCAUGGGAACC  
>N2245  
GUCUUGUACCUGUUCUUCAGACUGGUGUGGCCUCAUAUGCU  
>N2246  
AGCAUUCUGGUUAACAACAGACUGGCAUUAUGUAGCUCAAC  
>N2247  
ACUGUUUUGUCCUUAAGUAGACUGUGCCAGAGCAUCACAGA  
>N2248  
UUCAGAUUCUCACCACUAAAACUCUCAACAUCCAUUCUAG  
>N2249  
UCUGAGUUCUAGGGGGUUGAACUCAGAGCUUUGUGCUUGUG  
>N2250  
CUCAUGCCUAAGAUAAGAACUGAUGAAUGGGACCUCAUG  
>N2251  
UUGUGAAUAGUCUCUGAGAACUGCAACCAGUCUAGGUUAG  
>N2252  
UCCAUACCGGACAAGGAGAAACUCCACAUAAGUGCUGAUUU  
>N2253  
CAUCUUCAGCACUAACUAAAACUCAUCACUUUGCUGAGGCC  
>N2254  
UUCUGGUGAUGACUAGGCAAACUGGAGAGCUCCCUUGACAC  
>N2255  
ACUAUAUGUUCUCUGAAAGAACUAUCACUUUACUGAAGUGC  
>N2256  
UAGUCUAGUAAGAGAU CAGAACUCAAAAUCUGAAGUAUGUU  
>N2257  
AGAUCUGGCAGGCUCCAAAGACUUCUAGGACCAUAGGGAAU  
>N2258  
AUGUACAAAGAGCUCAAGAAACUGAACUCCAGAAAUUCAAA  
>N2259  
CAGCCAUGUCAGAGAAAAGGACUUGGCUAUUGCUUUACAUG  
>N2260  
GGUAAGUAGCCUUUCAAGACUUGAUUUUGUGAUUUUAUG  
>N2261  
AAUAUGGGGUCCUAAAAGAGACUCCCCAUAAAACAGGACUC

>N2262  
GGAACUCGCACAGGGUAGGAAACUUGGAAGCAGGAGCUAAUA  
>N2263  
AAGAGCAGAAAGAAGUAGGGACUGCGGCUCUGGUCCAGGUA  
>N2264  
CUAAGGACAAGUCUGGAGGAAACUCUGGAAAAGCCACUUUAC  
>N2265  
GUGUAGGCCAUUUCUUUCAAAACUCACUGAAAUUCUUUUGUC  
>N2266  
CAUCUAAUGUGUGACAUUAAAACUCAUUCUCACAGUACAGUG  
>N2267  
AGAUUUCUUUGGGAGACAAAACUUGAGGUGGCAGAAAUGAA  
>N2268  
UAGGGUUUUGUCUGGUUUGAACUUGUGUGGACUAGAUUUGG  
>N2269  
CGGCUGAAGCAGUCCUGAGAACUACUUGAAGUUUACCAGAC  
>N2270  
GAGCACACAGCAGGGGAUAAAACUCUCUCCUGCAAGGAAUGC  
>N2271  
CUUUGCAGACUAUAAAAUGGACUGUGAGGUUAGUUCUGGAG  
>N2272  
AGCAGAAGGAAUCAUAAAAAACUUUAGGAUUCUGAUACCA  
>N2273  
UGUGUAAUACCAGCCUUUGGACUUGAUGCCAACCUCUAAG  
>N2274  
AAAUAACAUAUAAUUAACAAACUGAAUUGACCUUGAACUUU  
>N2275  
GGAAACUAGAGGCAUCAAAAGACUGGAGUCCCAUGGAAUUU  
>N2276  
UGGGCAAGUUUACAAAAGAAACUGCCUACGUUUUGCUUGGC  
>N2277  
GGAACUCCUAAAGCUGGUAAAACUCCUUUAGUGAGGAGGUUG  
>N2278  
GAAAACAUGUUCUGAGUCAAAACUCUCAUCUCCUUUAAAAU  
>N2279  
UUUCCUCUUGAGAUUCAAAAACUGUAUUCACUCUUGCUCU  
>N2280  
UAGACAACUUGUAUCAAAAAACUUGCUACUCAGAGAACGCA  
>N2281  
AACAGAAAGGGAAAUAGUGGACUGGGUGAGAUGUUUUGUGA  
>N2282  
UGCAGGUAUGGCUUUUUAAGACUUAGUUGUUUUUUUUUCUU  
>N2283  
CUCAUGAAUAUAGAUCCAAGACUGCAGGGUCAUGAGGCCAG  
>N2284  
AUCCAGAAUAGCAUCAGAAAACUAAAUAGAAUUUUUAUUCAC  
>N2285  
AUAGCCUCUUUAUUCUGGAAACUCAUGAUUACAAAUUUUUU

>N2286  
UCAAAUAUGCUGAGCAGGAAACUCCACCAGACUGUUUAAGA  
>N2287  
UGAGAGAGGAGCAAGGGUGAACUUCAGAAAGGGCUAGCAUA  
>N2288  
UGGUCUGAU AUGUGGUAGGAACUGAACCUGAAUCUUGUAUA  
>N2289  
AAGUAGAAACAAUAAAGAAAACUCAAGUGAGGCAACACUG  
>N2290  
AGUAGGGUCUCUGCUUAAAGACUCAAGUGAGGCAGGGCUGG  
>N2291  
AGAGACACAGAUACAUAAGAGACUCAGACACAGACAUACAAG  
>N2292  
AGUUAUUUAAGGCAGAGAAAACUUAAGUAUCUGUCUAAAUA  
>N2293  
CAUGUUUUCCUUAGACUGGGACUCAUGACUUUGAAGAUUUU  
>N2294  
GUGUUCUCUUGACCAUCAGGACUUCUCUCCUGUCUCUCCC  
>N2295  
GACCAGAGUAGAUACUUAGAACUAUAGAUAGCUGAGUUACA  
>N2296  
GGCUGAGAAGCACCUAAGAACUGUUCAAAGUCCUUAGUGA  
>N2297  
GAUGUGAAGAUUCAGGUAGAACUGAGAUGUGGCUCAGUUGU  
>N2298  
UUGGAAUCCCACAAAAGUAGACUCUAAUGCCAGUAAAGGUA  
>N2299  
CAGUCAACAUUUGAAAUAACUUGACUUUGACCUUGACUC  
>N2300  
UUCUGUUCUGUUUGUCAGAACUAGGCUCUGUUGCUUCCC  
>N2301  
CAUUUUCUUUCAGGACAUGAACUCUUCUAAAAUUUGCAUA  
>N2302  
UAAUGAUUUUAAAAAAAAAAACUUUAAUUUUGUUAACUUG  
>N2303  
GUGAGAUUAUGUCUCCUAAGACUGUCAAGUAGCACCAUUA  
>N2304  
UAGCUCAAUGUUCUGUGAAACUCUGAAUAGUGGGAAUAGG  
>N2305  
AAAACAUUUCAUUAGUCAGAACUGGGAGGAACAUAAACUUCA  
>N2306  
GUAUCCACCAUUAAGCAAACUGAAAAACACCCAAAUGAU  
>N2307  
GUGGAAUAGUGCAAUAUAAACUCCCUGCACUAUGCUCUG  
>N2308  
CCUAUGGGAUUCUUGUAAGAACUGAGCACUGUCAAGCUUGU  
>N2309  
AAAAAAAAAAAAAAAAAGGAAACUAGGCAGAAUGCUUGCUG

>N2310  
UAAAUGGGACCAAAAAAGAAACUCCUCUUGUCACAUAAUUA  
>N2311  
CCUCAUAACAAAGACAAAAACUAUCUCAGAGUAAAAGGAU  
>N2312  
ACAGAUAAACCCCUAGAUAAACUAACUAAAGGGCCCAGAGG  
>N2313  
AUCAUGGGGGGAAAAUAAAACUAUUUCUAGAUACAAUUG  
>N2314  
AUUUGCAAUGCAUGCUGCAGACUGAGAAUUUAACUAUUGUU  
>N2315  
AAAAUCUUACCAGCUGUAAACUUGAUGGAGGAUUAGUAUC  
>N2316  
UUUGGAAUUCUCCUCACAGACUGUUGUGCCCUCUCCAGA  
>N2317  
CCCUGGGCAGUCCUAAGGAACUUCAUCCCUUAUCCCAUGA  
>N2318  
GGCUUGGUUAUAAAUUUAGAACUGGUUAUAGAAAAACAGCUA  
>N2319  
ACAGUGGUGUGGAAGUAUAAACUGUGAGGAGCCGCCAUGC  
>N2320  
UUACAACAAAAAUUUUAUAAACUAAUGCUUAUAAAACAUAA  
>N2321  
CGCUGAUUUGUGGCUUAAGAACUGUUUAUGUGGUGGGUGGG  
>N2322  
GUCAAGACAUCAAUUCAGAAACUGGUUGCAGGGUUAGCUGU  
>N2323  
AUACGUUACUGGUGCAGCAAACUGUAGUUAAGUAUACACAC  
>N2324  
UGGAAUCAUCUCUAAUUCAGACUCUGCUCUCCAGAAUUACGA  
>N2325  
ACCAGACAUGUAAGUUACAGACUUCGGUAUCUACCAGUCU  
>N2326  
AUACCAUUAUUCAUUUAAAACUGUGACAGCAUCCAUUCUU  
>N2327  
UCCUGGACUGAGUAGACUGAACUCACAUUCAAUUUUAGAUG  
>N2328  
UAACCUUGC UAAAGACCCAGACUUGUAUUAAGAGUUUUAAA  
>N2329  
CCCUGCCCCAAGGGUCCAAACUGGGAAAAAAAAAAACAACU  
>N2330  
AUUGCAACCACUUUGCAAAAACUCCUUGGCUGGCAACCAUA  
>N2331  
AGUGUGGGAUUUAUCGAAACUCUUGCUUUCUCUAUUGCU  
>N2332  
AGCUUUUGCCUCCAUGAGAACUUGGCCUACUGUGCUUCU  
>N2333  
ACCUACCAAUUGCGGAAGAAACUCUCAAGCAUGAACCUAU

>N2334  
UAUAAGUAGAGUAAGAUGGGACUAAAUACAAGGCACUGAUC  
>N2335  
UUUUUUUCAUUCAUUAGAAGACUGUUCAGUUUCACAAAGU  
>N2336  
CUGUCAUUCUCUACCAGAAGACUGGGGAGACUAGCUCUCUC  
>N2337  
AAUUCAACAAGCAAUAAAAACUGUAAUUAUGAUUAUCUGAA  
>N2338  
AUUUUUUCCUCUGAGUAUAGACUGAGACAAAUUAACUUG  
>N2339  
CAAUAUAGCCAGAACUCAAACUAAAAACCAAAGCACCCAA  
>N2340  
UUGGACAGGGUCUCUCAUGGACUCAAAACUCACCAAGUAGA  
>N2341  
GAAAGGUUAAUUGAAAGUGGACUCCGUGAUGCAGCAUUCAU  
>N2342  
AGAUAGCAGCAAUAAAAGAACUCAAGGCUGAAAUCAACUG  
>N2343  
AAAUAUCAAUGACUAGACAAGACUGCCUACUUUCUCCCUACC  
>N2344  
AUUCUGUUUGUCUGAGCAAAACUUAUUUAUAGGGGAAGCAA  
>N2345  
UAGUUCUAGUUGAGCAAAGACUAGAAAUCCCAUGAUCCU  
>N2346  
AUUCAUUGUGUCCUGUGAGACUGCUACAUAUUUGGUGCUA  
>N2347  
UUUAGUGUGUUUUAGUUGGAACUAGAGCUAAGAUGAUAAUU  
>N2348  
UGAUAAAUAUUUGAAUCAGAACUGGGAACUCAAUACAAGG  
>N2349  
UCAAGAUGGACUUAGUUGGAACUUCUACUUUGUUCUGUUGC  
>N2350  
AAGGCUAUUAUGAUCACAAAGACUGUGGAGGCAAGAGGAGAC  
>N2351  
AAAAAAUAAAAUAAAAUAAACUCCAAAACAGAAAAUCCA  
>N2352  
GCUACCAGCAUUCAGUGGAGACUUAAGUGGCCAGUGGGU  
>N2353  
CUUCUCUGACUGAACCCAGGACUGGCAUUCUCUGCUGUAU  
>N2354  
GAAAGCUGUGAACCCUCAAACUACAAUGACAAUUGACCUG  
>N2355  
AUUAUUAAGGGAGUCAAGAAACUGUGGGUAGACCAAUGCCA  
>N2356  
AGUGAGACCUGGGACCAGGAACUUUGGGUACAAGAUGAGAA  
>N2357  
AAAGUAAAUGGUAAAUACAAACUAGAUAAAGAAUAUUGGUU

>N2358  
CUCCUCCUAAGGACAUGAGGACUAUCUUUUUCAUAAGACGGC  
>N2359  
CAAUGUUCUCCUGGAGUGGACUUGAUAGAUUUUAUACAAAA  
>N2360  
UAAGGUCCAUCCUUCCCAGACUCAUAGAUAGUAUGCUCAA  
>N2361  
GAGUAGUGCUGGUUUCUAGAACUUUUUUUUUCUCAAUUA  
>N2362  
AAAGUCCAUAAGAUGCUGAGACUUUCUGUAUAAAUCCUAAA  
>N2363  
ACAAUCAAU CGCUGUUGAAAACUUGGCCACGAUCUCCACAU  
>N2364  
GAUUAUUUUUCCAGGGACUCCAGACUGCUGUAUUUAU  
>N2365  
CAAUGGUUUUGUGUGUAAAACUGUAAAAAUGAGUCACAAU  
>N2366  
ACCAUGAGGCUCACAAAAGGACUUUAAAGUCCUCGAACUA  
>N2367  
CAAGGACUACUCAAGUGAGGACUGCCUUUAAAAGAUUAAA  
>N2368  
AUUUUCUGGUGAAACAUUAGACUUUUUUAUUGUGUAGAACA  
>N2369  
GCUUGCCUGAAAGUGUUUAGACUGAUUUAAUUGUCUGACAU  
>N2370  
ACUUAUAAAUAUUAUCCAGACUUGUAUUUGACCUAUUCAG  
>N2371  
AAACUGUUUGGAUUUCUAGACUUGUUGCUUAAUCCCAUUA  
>N2372  
ACUUCUUAACAACAUUUAAAAACUACCACUCUCUACCUAUCC  
>N2373  
UAUAAAGUUUGUUAUUAUAAACUAAGGAAACUAGAUUCAA  
>N2374  
GUGUCUGAUGACUAGAGGGGACUAUCUUGGGUUGAUUGAUG  
>N2375  
GGAAAGAGUUGUAAAUCUGAACUCAUAUGGAAGUUACUCUC  
>N2376  
UAACUUAAGCUCUCUUAAGAACUGAAAUGUGUCCAUGAAUA  
>N2377  
UUGAACUCUAGCUUUUAUAAAACUUGAUUGACAACACCCUG  
>N2378  
UCCUGGCCUUGUACAAGACUGUACUGUCAGCCUGUGCU  
>N2379  
GUUGCCACUGUUAGCUGAGAACUUAUUGAGCUCCCAACUCU  
>N2380  
UGCUGAUACAAAUAUUAUAAACUUACAAAUGUAUAUAAAAG  
>N2381  
AAUUCAUUUACUCCUAGGAACUCAUGCUAGUUCAGGUUA

>N2382  
UUUAUUUUUAAAAUUAGUAAACUCUUACAAUCCAGAUUUUA  
>N2383  
GAAAGGAAAAGAAAGGAAAAACUUGAAUGAUUUUGUUACGU  
>N2384  
AUUUUCAUUGUGAUUUUGAAAACUAACUCCUCAUAAGAUAAA  
>N2385  
GAUCAUGAUGGGUUGAUCAGACUGUAAGUAAUACCAAUCCU  
>N2386  
GUCUGGUUCUUUUGUUGAAGACUAGUGGCUCAAAAGGCCGG  
>N2387  
GAAGAGCAAGCAUAGUUAAAACUAUGAGAAGUAUAUGUGAU  
>N2388  
UAAUCAGCCACCAAACACAGACUCUAUCCAUCGCCAGCA  
>N2389  
AAUGGAAAAAUAGAGCACAAACUAGAUUCUCUCAUCACCA  
>N2390  
CUGAAAGAUGAGGCAGGAGGACUGAAAGUUUGAAGACAGUC  
>N2391  
AAUAAAUGCUCUGGAGCAGACUUGAUUUGUUUAGAGUCC  
>N2392  
UAAUGUUCUUCACUUACAGGACUGAAUUCAAACAUCAGCU  
>N2393  
CAAUUAAAUCUUAUUUUGAACUGAUGACAUAUCUGGAGAA  
>N2394  
GUGCUUUUCUAUUUUAGAGGACUUUAAAAAUGGAUAUUGU  
>N2395  
AUCUUUAGCACUGAGUUAAAACUAUGACAAGGAGGACCAGA  
>N2396  
UAAAGAACUCAUUUAACAAAACUAUUUAAAAAUGUCUUAU  
>N2397  
GCAACAAGAAUAAAAGACAAACUUUAUUUUUCUUUCUUUU  
>N2398  
GUCAAGCGGAAAGGAAGUAGACUGUAUGACAUCAGAGAAAA  
>N2399  
GUUAAAUACAUCACAAAAAGACUACAAAGCAUAUGUGUGUA  
>N2400  
UAUUUUGUUUAUAGGACAUAGACUAAAUAGACAGUGAGGAGG  
>N2401  
GAUGGAUUUAAAUAUAGAAAACUAAGACACACUACCUCAGA  
>N2402  
GUUGUCGCUAUGCUUUAAAACUCUGGCCUCAUGCAAACA  
>N2403  
GGAGUACUGAGAAUUUUAAAACUUUCUUUCAUUUAAAUUA  
>N2404  
UAGGCCUGCUGCCAUCAGAAACUGCCAGUUCUCCUGCAUU  
>N2405  
UGCUCUUUUUAGUUCUGGAGACUUUAGAGAAGAGAAUCAA



>N2406  
CCUUCCUAACAUCUGUAAAACUGAAGACUUUGACAUUAAU  
>N2407  
GGCACUUUUCACCACCAAAAACUGAAAACUUCAUGGCAGAC  
>N2408  
UAUACCUAAGUACCACAAAAACUUUACCAGAGAACUACUAC  
>N2409  
ACCAUACUGUCCUGGAGUAAAACUCAGCAUUGAGCAGGAUCA  
>N2410  
UUUAUGCAUUUUGUCCAAAACUGGUCAGAUUCUCAUAUGU  
>N2411  
UUUACAAAAUAUUAAAAUAAAACUGACUAGUGGGUUUUUAUUC  
>N2412  
CAUUCUCCAAGUCACAGUGGACUUCAAUUGGGUUCUAUACA  
>N2413  
CAUUUCUCCAACUCCAUAAGACUACAUGCAAUUCACAGAUU  
>N2414  
CAAUUUCCAUAAGACUGAAAACUCAGUAUUUUAAUACUUCA  
>N2415  
GAAACCUUCUAGAUAAACAAAACUAAUUGUAUCUGCUGAAAA  
>N2416  
AAGUAAUGGCUAAAAUUGAAAACUUUUGAAGAUGAUAAAGCCU  
>N2417  
CUGUUUUAAUUGC UAAUAAAACUUCACAUUACACAAUAAU  
>N2418  
AUAACUCAAGGCUGUGAAAACUAAAGAAGAAACAUUAGUC  
>N2419  
GUGAGCUCAAGUCAGUAUAAAACUGUACAGAGAGUCCAUGG  
>N2420  
AACAUUCUGAGUCUAAGGAAGACUUAUUC CCAUUCAAAACUC  
>N2421  
AGAUUUACAUGAAUUAUGAAAACUCUCUACUUUCUUGUAAU  
>N2422  
UAUUCACUUCUAUUCUAUGGACUUCAUACUUUAUUCUACU  
>N2423  
CUGCAUUAAAAAAAAAUGAAAACUUCAUUUCAGAUUCCUUCU  
>N2424  
UGAGCUCAUUGGAGAACAAAACUAAGCUUAUGGCCAAGAGG  
>N2425  
AGGAGUGGAACCAUGUCUAGACUGGUAAAACCUUGUCUGUAU  
>N2426  
AUGACCAACUUUCAAUAAAACUGACAGUAAUAAAUAUA  
>N2427  
ACACAUGCAGUUUAAGAAAACUGUCAGGCAAAACCAAGGG  
>N2428  
ACCCUGACUGGUGAUGAGAAAACUCAUAUUUAUUCUGUCAAU  
>N2429  
GUGACUAGAGCAGGUUCUGAACUUCUGGAUCUCCAGGGUU

>N2430  
AUCAACUGCAGAGGAGCUAGACUGGUUUAUUGUAGAAAAACUA  
>N2431  
AUUAUUC AUGAUUGAUCAGGACUGUUGUGUGUAUAAAAAGA  
>N2432  
GUUUAUUACCAAUUGACAGACUCAGGACAGCAAGCAAGUG  
>N2433  
AUCCCAUUAACAUCACCAAACUCAGACACUACCAUGGAUG  
>N2434  
CAGCAACUAUAAUUUCAAAAACUAUUUAAAAGUUAGAUACA  
>N2435  
UCUGAAUUGACUGGCUGAAACUCAACAAUUUUGGGGGGAA  
>N2436  
GAACAAUGUGUUACCUCUGAACUCUAAGCCUCAUUCAAAUA  
>N2437  
UGAAGCUUUUAUGAAGUGCAGACUAUGAGAAAGAAGCCAGAC  
>N2438  
AUGUGACUGAGAGACCAAAGACUUCAGCAUUACCUACUAAC  
>N2439  
AAUCAAAAUGUAGAACAGAGACUGAGGGAAAGGCUGUCUGG  
>N2440  
AUCUCAUUAACAGCCAUCAAAACUUGAAUGCUAUUGUGGAUG  
>N2441  
ACAUAUGUGGCAGAGGAUGGACUUGUUGGACAUCUGUGGGA  
>N2442  
CCCGGUUUUCCUCUGCAAAAACUCCUAUCCCAUCCUCCUUC  
>N2443  
UUCUUUCUUGGCAUCUGAGACUUUCUGUUGCCUAGCCCAA  
>N2444  
AGCUAAGCUGAAGUGGUUAAAACUUUAUUGUCUGGUAGAAAU  
>N2445  
GGCUGGGUUAUAGUAGCCUGGACUUGCAUUUGUGUUCUCCUA  
>N2446  
CCAGCAACAUGGCUACUUAGACUGGAAUAUAAAUGUCUUUA  
>N2447  
AUAAAUUGUGAUUACUUAAGACUAACUCUAUUCUUUAAAGU  
>N2448  
AAUAUGUGAGGGAACACUAGACUGACCAGCACUAUCAGUAG  
>N2449  
CUUAUGAACUCAUCAUAGAAACUAAUAUAUUAUUGUCUUGC  
>N2450  
AUGCAGAAUGAUGAAACUGAACUAUAAUAGUUCAUACACUG  
>N2451  
AUAACAAUAAUUUCUAUUAGACUGUGAAAUGAUGAUAGCAG  
>N2452  
AACUUUAACAGAAUAAUAAAACUUUUUUAUUUAGAGAAAAA  
>N2453  
ACCUGGGAGACUCACACUAAAACUGUUUUUAUACCAAUGUUAA

>N2454  
UAUAGGAUAGACCCAAUUAACUCAGUAAUUUAUUAACAG  
>N2455  
AUCUUAAUUAUGUGAUUAAAACUACCUUCAUCCAUGUCUU  
>N2456  
AUCUUGUCAUGGUCUGCUGAACUGACUGACUUAAAUCACA  
>N2457  
CAAUUUGAAAACUGUCUUGAACUUCUCUCUUAAAAGCAUUG  
>N2458  
AGGAGAAAUAUUUGGUAGACUGAAGAUGAUUCCAGGAAA  
>N2459  
AAUAUAUUUACAUUCUAAAACUGAAAUAGAUGUUUUAAAU  
>N2460  
AAUAUUUAAAAUUUAAAAACUAUAAAAAUUCUUAAAUUU  
>N2461  
GAGCAUAUAUUUAGUCUAGAACUCUCCUGGUACACAGAACA  
>N2462  
AAUACCUUCUAUAUAUGAGAACUAUAUUUGUGGUGUGUGUG  
>N2463  
AUCCUGGUUUCUGCAUUCAGACUAAUGUCCUUAUCCUACU  
>N2464  
CUUAGAUUUUAACACUGAAAACUAAUUUAUAAAUAGAAAA  
>N2465  
UUUUUAUUAGGUAAAGGAAGACUUGUGCAAUCUUAUGAAAU  
>N2466  
ACAAUAUUAAAGAGGGUGGAGACUUAUGCCACAUCUCAAGU  
>N2467  
CUGCUCUUCAUCAUGUGGAGACUCAACAUCUACCUCUCCU  
>N2468  
CUUUUCGGUUGGUGGUUCAGACUAUAGGAACUCCAGGUCC  
>N2469  
CUUCAAUUUCUUUCUUUGGGACUUGAAAUUCUAAUCAUAAA  
>N2470  
UGCUAAAUGACCUAGGGCGAACUCUACAAGAGAGGCCAGCC  
>N2471  
UUAAAAAAGAAAGCUUUGAACUCACCUUUUAGAUACAAUA  
>N2472  
UUAUAGAUAGAUAUGGGAACUUGAAGCUCAUGUCAGGGG  
>N2473  
UACAGUAUAUAUCCAUUCAAACUAAACUUUAAAAGUUUUA  
>N2474  
GUAACUAUCUAUGAUCAGAAACUACUCUUCUUGGGUGCAAU  
>N2475  
UUGUCCAGCCUUGAUUAUAAAACUUUUUGACUUGUCUUAUUG  
>N2476  
AUUAAAAGCAGCUUUUUAACUAUAAAUAUCUUUGAGUUA  
>N2477  
UUGUCUUCUCAGGAUGCUGAACUACUUUAUGGAUGUAUAC

>N2478  
UCAUCUCUGAAUGAACACAGACUGUGCAGUCUGCUACUGUA  
>N2479  
GGGGUUAUUUCCUAAACAGAACUCCAAUGGCUCAUGCUCUA  
>N2480  
AUUCUAUUGUUGUCUAUAAAACUAACAGCCUAAAAAGCUAU  
>N2481  
CUUAUUUAUAAUAGCCAGAAACUGGAAAGAACCCAUAUGCC  
>N2482  
GGGUGGGGGAACAUGGGGGGACUUUUGGAAUAGCAUUGGAA  
>N2483  
AACUAUCUAACAAAUCAGAACUUAUAUUGCUGUCAAUUCA  
>N2484  
AAAACAGUAGUUUCUUGCAAACUAUUGUUUCUAAGUAUCAU  
>N2485  
AUUAAAAGAGAUACCCAUGAACUAAAGCUGGACUACAACAA  
>N2486  
UUAUUUAUCUUGACUUUUAAACUAGGGUACAGAGCUAUGUC  
>N2487  
UGGGGGGUAGGGUCUGGGGGACUUUUGGGAUAGCGUUCUGA  
>N2488  
AUUAAGUGAGGUUAAAUGGACUCAGUAACCUUUAUUCAUA  
>N2489  
AAGUGAUUAAAACCUAUCAGACUUUCUUGUAUACUGUAGC  
>N2490  
ACUUAGAUAAAGAACUAUGAACUCAUCAAGAUAGGAUAAAU  
>N2491  
UAUCUGUGAUGUCGUUUUGAACUUAUUAAAACUUUGGCAA  
>N2492  
UAAUUUAUGUAGCUGUCAGACUGAUACCCUAAAUUACAUU  
>N2493  
CCUCUGAUGACUGGCAAUGAACUGUAUGAACUCACUGACCA  
>N2494  
CCAAUAUCACAAUAAAUAACUGGCAAAAUGCAUCUGGUA  
>N2495  
UGUAAAAUUAUUUUUCAGAAACUCACACAGCCACUUCAUAG  
>N2496  
AUAAAGAAAGCCCAUGAAGAACUUAUUGGCCUGUCAUUCU  
>N2497  
GAAACCAUCCUUACCACUGAACUAAAAUGACUUCUUCAUUU  
>N2498  
AAGUCUACGGAUUCCUAAAACUGUUCCAGCACUAAUAAA  
>N2499  
UCUAAAAACAAUAGUAAAAAACUGUACCUGAAUUUUCUUUG  
>N2500  
ACUAUUCUGUUGAGGUUUAAACUGUCCA AUUGUGUGAAGCC  
>N2501  
CAGUCUGAAAUCAGAGCAAAACUUAACAUAAGCAAUAUGU

>N2502  
UGCUGGGAAACCUGGAGGAGACUUAGGGACUCUAACUUUUU  
>N2503  
GUCUGAGACAUCUCAAGUGAACUGGCUCUGUUGCAAUGACAA  
>N2504  
AUAUUUCAUAUAUUUUUGGACUGGAAGAUCAAGGAAAAUU  
>N2505  
CCAUAUUCUAUACUAUAAAGACUAAAGAUUUUGAAAUGUUA  
>N2506  
UGUAUCAUUAUUAUCUUGAGACUUCUUUGCAUGAAUGUCUA  
>N2507  
CAUAGCAAUAGGGUUUUUGAACUUACAGUUGUUGACAUUCC  
>N2508  
UAGCAGCAACUUCAUUGGAAACUACACAGAACUAGCACAG  
>N2509  
UUAGGGUGAGGCUGUUGCAAACUGGCUAAAUACUGUGGAAA  
>N2510  
CAGUCUGUCUGUUUUUAGAACUCUUGACUGUGUCUCCUAC  
>N2511  
UGUCUGAACAGAACAUAUAAAACUAUCUACUGAAUCACUAAA  
>N2512  
GCUGGAAGGACUAUACAGAGACUGCUCCACCCGAGAUUCCA  
>N2513  
AUUUUAUGCUUAGUUUGAAAACUGAUGUCUAUUUCCUGCUG  
>N2514  
UUCAAUCUACAACAGGGUGGACUCAUGUCCAAGCUAUAGAU  
>N2515  
CCCAAGAAACUGCAUUCUAAACUUAUUUAUUAUCAAUAUGU  
>N2516  
GAGGUCCUUGAUCCAUUUGGACUUGAGCUGAGAAGCAUAAU  
>N2517  
AUUUUUUUUAUAAAGGAAGACUACUUUUUAAAAAAGUUA  
>N2518  
UGGUAGAACUCUUCACUUAACUAUCUGAUCCUCGGCAUUU  
>N2519  
AUGUAUCUUUUAAAAAAGAAACUCUCUCUCUCUCUUUCUCU  
>N2520  
AGGGAUAUAUUAUAAUUUGAACUAAUACAUUUGAAUUUUUA  
>N2521  
UAGAAUCAUUGCAAACAUAACUCUUAGAGCAUAAUUCUUC  
>N2522  
UUACUUGAUGAGGAGUGAAGACUAAUCUUAUAUGUGGUUUA  
>N2523  
UCCUGCAAUACCUCUCCUGGACUUAUAUCUAGAAGAUGUUC  
>N2524  
UCAUUAACUCUGACCAAGAAACUCAUUCACAGCCAAGGGAG  
>N2525  
CUUCCUGACUGCUCUUGAAGACUUCAAUAUACCUGUGCCCU

>N2526  
GUGCAUAACUUGCUGGAGGAACUGACUGAUGUCUGAUUUGA  
>N2527  
AAACAUAUUCUAAAUUUAGAACUUAACACUACCUGGAAUUU  
>N2528  
AAUCACUGAUUUGAUAGAAAACUUCGCCAAAAAUGGUGCAA  
>N2529  
UAAACUCUGUGGUUAUAGGAACUUAGAAAAUUCCAUUUAA  
>N2530  
GAGUACACACAAGCCUGAGGACUCUUGGCUCCAUUUUAUCU  
>N2531  
AAAUGAAAAUGGACUUUAAAACUGCAGUAAUUUAAAUAUUU  
>N2532  
AAUUUUGUCAUGUGAUUUGAACUAGGAAUGCCACCUUCCG  
>N2533  
AUCAGUGUUGGAUAUCUGGAACUCAUGAAGAAUUUAGAAU  
>N2534  
UCCACAAAGGAUCUUCUUGAACUGCACACAGUUGCCACUUA  
>N2535  
GAAGGCUAUUAGCAAACAAACUGGAUAACUAGAUAGAUAU  
>N2536  
AUCCUGCAGUCCCUACUUGAACUCUCAGGUAAUUAAUUUGUG  
>N2537  
AGCAUAAGCAUGUUUUAUAAAACUAAAUGUUCUAGUAAAGAA  
>N2538  
UUGUGAAUGAAAUAUUCAAACUAUUGGAAAAUUUAAUGAU  
>N2539  
AUACCACCCAAUAACCAUAAAACUAAUGGUUGCUUAAGCUUU  
>N2540  
UUUGAAUAACUAGUCUUCAGACUGCAAAGAUUUUGUGUGAU  
>N2541  
AUUGGUGUCCAUGUUGGGAAACUCACAAAGAAUUAUAAAA  
>N2542  
AGAGCACUUAUAUUUAUGAAACUCACUAGCCAAAAUACUUA  
>N2543  
CAAGCUAAAUAGAGAAUUAACUAGCCAUAUUUAUGAAUCA  
>N2544  
GUAAAGCACCAUCCAGUGAGACUGAACUAAAUUUAUGAGAC  
>N2545  
CCUGAUAGAAUUACAGAAAAACUCAACCAAACAGGUGAAGG  
>N2546  
UCUCCAAUAAAAUAUUUAGACUAACAGACUGGCUAGGUAA  
>N2547  
CUCUCCUUAAAAACUCUUAACUCUUAUGUAGUACAUUGGCU  
>N2548  
CAAAAACAAGAAACUCUGAGACUUUUGUAGUUCUUUGGAGA  
>N2549  
UACACCUCUAUAUUUGUUGAACUCUGGCAGGAGACAGCUCU

>N2550  
GAUCCCGGGGUGGGGCAAAGACUUAUGAAGUUCUCUUAUGA  
>N2551  
AUUUUACUUUUUCUUUUCAGACUUAACAUGGUAGAGUAGA  
>N2552  
UUUAAUAUCUUUAUAUAAAAACUAAAGAUGGAGAAGGAAAU  
>N2553  
UACCUGUUUUUAAAAAAAAACUUUGUGAAAAGUAAAAUUAU  
>N2554  
AUGUACCUAACCCUCAAGAGACUGAAGGUCCCAUGGAGUUU  
>N2555  
AUUAAAAUAUAAGAAUAAAACUUUAUGCCUUAUGAUAGGG  
>N2556  
AGAGUUUUUAAGGGGUUAGAACUUAUAGAAAGGUUUUGAAU  
>N2557  
UAAUCUGUCAUGAAAAAAAAACUGUAUUUUCAAAAUAAUAA  
>N2558  
UUGUAUGUUAAGUCCAAGAGACUCCUUGAUUAUCUUAUUUG  
>N2559  
AUCAUGGCAAAAUUCAUCAAAACUCAAUUACACUGGGACCUG  
>N2560  
UCAGAAUCAUUCUGUUAGAACUCAAGGAGAAUCCCCUUU  
>N2561  
UCGUUUCGUGUUUGUGUAGAACUCAUAAGUGUGUGUGUGUG  
>N2562  
AUCAAGAAUGAUAAUUGGAAACUAGAGGACAGCAAUCAGA  
>N2563  
CCUUAUAUUAUUCUGUUGAAACUCACUUCUGUAUAAUUGCU  
>N2564  
AGGCUAACAUGGUAAGGAAAACUUAUUAGGAACUCAAUCCU  
>N2565  
AAAUAAUAUUCAUAGAAGAGACUACUAAUAAUUAUUUAGC  
>N2566  
CUUUCUGUAGAUCAGCCAGGACUCUAACUCAGAGAUGUGCC  
>N2567  
UGUUAUAUUGUUCAAUAUGGACUGCAUACUUCUGUUUUCUA  
>N2568  
GCAACACAUAGUCACAGCAAACUAUAGACAUUAAGAUAG  
>N2569  
AGGGUUACUCCCACUCCCAGACUUCCUGGCUUCCAACUUCU  
>N2570  
AGUUUUUUUUAAGGGGUAGAACUUUGAGCAGGUGGUCCCCU  
>N2571  
GUAACAGAACAACAAAUGAACUAAAUAAGAUAGAAUUAU  
>N2572  
CAAAAAGAAAAGGAGGGAAACUUAUACUCAUCAAAGGUA  
>N2573  
UUGAUGAAUUAAGGGCAUAGACUCAUGAAGGUCAGGAUCUA

>N2574  
AACUAUCCAGUACCCACAGAAACUCCUUGGGACUAAACCACC  
>N2575  
CACAAGUUAACAUGCUGGAGACUGCAGAUUAAAUAUAUG  
>N2576  
CACUCAUGAUCUUGGAGCAAACUCUCCUGACUACCACAGGU  
>N2577  
GCCAACAGCUUUCAUACUGGACUAAAAAUAGAGAAGAGAA  
>N2578  
UUUUCAAGAAACAAAUAAGACUUAUUUGCUUAAGAUAAAG  
>N2579  
UUAAAUGUGAAUACUCUGAACUUUGAAAGACAGCCACACC  
>N2580  
ACUUACCUUGAUGACAAUGGACUGACACUGAACCUGUAAGC  
>N2581  
CAUGGACCAAACACAUAUGAACUCAUAGGGAGUCAAGUGUU  
>N2582  
AAACAAACUCAGGCUAACGGACUAUGUACACAAAUGGAUU  
>N2583  
UUCUAAAAACUGAAACCAAAACUUCAAUACAAUGACAAAA  
>N2584  
UUUCUCUAAUAAAUGGUGAAACUCAGAUGUUAUUGUGCCUG  
>N2585  
GAUGAAAAAAGAACCAAAAACUAUAGCUUAAUGAAAGACU  
>N2586  
CAUGCUGUAGAGAAUAAGAGACUGUGGAAUGCAGAGACCUA  
>N2587  
GUGGGAGAUCUGAGACUAGGACUUAAAAUACCUACUUAAGG  
>N2588  
UUCUGGCAAUUAUAAAUAAGACUGCUAUGUACAUAGUGGAG  
>N2589  
UCCUUGCUCCAAUUUGGAAACUGGAAUAAUUUGUGUCUGA  
>N2590  
GUGAUCCUGAUGGCAAAGGACUUCUCAGGAAUUCAGGAAG  
>N2591  
GCCAGAGCUCUGACAUUAAACUACCUCGUGUAUUUACAUC  
>N2592  
UUGGCAAAAUGCAACUCAAAACUACAUUGUGAUUCCAUCUU  
>N2593  
AGAGGUGAGAGACUUCAAGGACUCAAUUGGUAGUGAACUUA  
>N2594  
CAUGAACUCAUAGAGACAGAACUCUCUGCUUGUAUUUUGGU  
>N2595  
CAUAGAAUGACAGUUUGUAAACUUUUGGGUCUCUGACCCUU  
>N2596  
ACCACCCAUAACAACCAGGGACUAAGACAUCAACAAUGGAG  
>N2597  
UUGCGUUUGUUUCAAGCAAACUCUAAUUUCCAAGAUGCC



>N2598  
CCACACUCUCACCUGUGCAGACUACUCUCAGUGGAGUCCUG  
>N2599  
AGCCUAUUCUAUAAAUGAAACUCAUUCUGACACUGUAUG  
>N2600  
GAGAUGAAAGCAAGAACAGGACUCUCAAGGUAGUAUAUGCU  
>N2601  
UAAGAAAGAAAAGCAGAAGAACUGACCAGAGGUUUUCUGUC  
>N2602  
AUGAGGGGUUUCAAAACAGAACUCAGAGAAACUGUGAGAAG  
>N2603  
AUACUUAAAUAUUUGCAAACUAUUUUUGGAAUAACAAAA  
>N2604  
UGUGCUAACAUGCUAUUAAAACUAACACCAUCCCAAGAAAA  
>N2605  
AUAGUUUUGAUAAUAAAGAACUCAGAUUUAAUUCAGUAUU  
>N2606  
UAAGAAUGAAGAAAUGACAGACUAUAUAGGGCAGUUUGCUA  
>N2607  
AGAUAAAACAUUUUGAGAAACUCUGGUGUCAGUUUAACAG  
>N2608  
CAAAGGAAUUAUCAAAGAAACUGUGAAGAUAAAGAGCAA  
>N2609  
UUGCCAGAACAUCUAAACAAACUUCAUUGCUACAUAUGAA  
>N2610  
UUCGGAUGACCCCAGUAAAGACUCCUAGUAAAGGGGGAUUU  
>N2611  
GUCUUGAGUCUAAUUAUUGAACUGGUUAUAGAAAACAGUAAA  
>N2612  
UUAACCCCGCCUUUGAAAGACUCUUCUGUGUAACAAAUU  
>N2613  
CAGCUGCCUACAAUUUAGGGACUAUGGCCACAAUGUGCUGG  
>N2614  
AUGCUUUGGAAACAAGAGAGACUUGCACUGAGGGCAUUUUA  
>N2615  
CUAAACCAGACUGGUCUUGGACUCAGAUCAAAGAGUAUUCU  
>N2616  
UUUAUUUAACUUUUCUCAAACUAUAAUCUUUACUCACUA  
>N2617  
AGGAGCGCCAGCAAUGAAGGACUAUCUGUCAAUACAUUG  
>N2618  
AAAGAACAAGGUUACAAGACUGGCUCAGGGUUUGUCGGG  
>N2619  
UACUGCAAUAAAAGAAUGAAACUCAUUUUACAUCUGAUCAU  
>N2620  
CUACUAAAAGUGUAAACAAACUAUUUUUGUAGAUAAAUAU  
>N2621  
UUGUGCCAUGUGUGCAGCGGACUGUAGAGUUUGAUGUGAGG

>N2622  
UGAUUAGGGGACCAUUAUGGACUUUUUAUUGAUUGCCCUUCA  
>N2623  
AUAAUUUCUGUUUAUUCUGAACUUUUAGCUUAGCAAGCAGU  
>N2624  
GCAUCGCAGUCUUAUGAGGACUGAAAUGCCUUUAUCUCAG  
>N2625  
AAUAAAUUUUGCAAUUACAAACUAGGGCACCAUAGAAUUUA  
>N2626  
UUUCUAAUAAUCCAAUAUAAACUUGUUCUCAUGUAAAUUAA  
>N2627  
CUUUCACUACUUAUACCCAAACUGUCUUGAACCCAUACAGU  
>N2628  
AGAAUACUCUGCCACUGAAACUAAGGAGAGUGCUACCCUC  
>N2629  
UGGGGCUUUUAGAUCAUAAACUUGGUCAUGAUUUAAACUUU  
>N2630  
ACCAACGUAUCAUUGAGAAGACUGUUGUCAAUCCCAUGU  
>N2631  
AUAGGAAAUCAAGAAGUUAGACUCCAGAGAACCAAAUAACC  
>N2632  
CUACAAUGUAUGGAUGAAAAACUAUUUUGUCUACUAAAGAA  
>N2633  
AUAGAGGAGUUGGAGAACGGACUGAAGAAGCUAGGGCAAUU  
>N2634  
UCUGAAGUCAUCAGUUUAAAACUUUCUCCAUAUACCUAAAU  
>N2635  
GAAACAGUACAUGCUACUAGACUGCUCAUAGUCCACAUGA  
>N2636  
CUGACCCAAUAAUGGAGGAAACUAAGAGCUGCCUCCUGGG  
>N2637  
UUGUCCCCUCAUGAAGGGAACUAUGAAAUGACCAAUGUGG  
>N2638  
AGCAAACUGUCCCAUUUAAACUGAUUCUGCUUCUGAGUUU  
>N2639  
CCAGCAUUACAAGUUUUAAGACUAUGCAUGAACACUCAAU  
>N2640  
GGUUCUUUGCAGAGAUUUAGACUUACACUCACUGUUGAAUA  
>N2641  
AAGAUAAAACUUGCCAUAAGACUCUGACAUAAAGCCUGACU  
>N2642  
UAAUAUUAAGCUAGUAACAAACUAUUGUUGUAAAAUAUGA  
>N2643  
UCAGCCACUUCAGUUGAAGGACUACUCAAUUCUGCACAU  
>N2644  
CCACUAAUUCUGCUAAGUGGACUUUCCUCAUGACCACAAA  
>N2645  
GUGAGUGC UUAAGAUGC UAAACUAUGUAAAAUAUUAUUUGAU

>N2646  
GGUUGUAAAAGGUGUCAAAAACUUUGACAGAACAUCUUUUA  
>N2647  
AAUUGAAAUAUCAAAAUAAACUGAAUUAUGCCUAUCAA  
>N2648  
UGACAGCUCCUACUUCCCAAACUCCAGCACCCUCCUCUUA  
>N2649  
AAGAGAGAGAAAAAAGAAAACUGACUGUUAUGUGGCCAG  
>N2650  
UCCUAAUUAACAAAUCAGAACUGAAAAGGGAGACAUACA  
>N2651  
GCUCCAAAUAGAUUUUAAAAACUUGGUUAGUGCAUAUAUG  
>N2652  
GUUUCAGGUAAAUAGUUUGAACUGAAAUAUUCUUCUCUGU  
>N2653  
UGCUGCAGAUAGAAGCCUAAACUUUGUCUUGUUUGUUGAUG  
>N2654  
UAGCUGCAUAUUAUGGUGAAACUUAUUUAAAUGCAUUGUC  
>N2655  
CUAUUAUUGCAUGAUUAUAAACUUUAUGGUUAUAGGAACUAU  
>N2656  
AAUGGUGUCAGCAAUUUGAGACUGAUUAUGGGAUGGAUCCA  
>N2657  
AUUUCUUUAAGGGAUAUAGGACUGGUUAGAUCACUAACCUG  
>N2658  
UUUCCAUUGCAUAUAUUAAAACUUAACAGCAAGCAAAAUA  
>N2659  
UCCUUUUGUCUCAGCUACAAACUUCAUAUCUGUAACUCCUU  
>N2660  
GGAAACCCAAACACCUUAAGACUGAUAGUGGACCAGCUUAU  
>N2661  
UGGGUAUUCUGAUUAAGUAGACUCUUUCUCCAUUGGAAUA  
>N2662  
GCAUGGUUCACAAGAAUGAGACUGUUUUCAGCACAGAUCCU  
>N2663  
AUGUAUCAAUAUGAAUAAACUCUUUAGUCAUUGAACUA  
>N2664  
ACAUUGGCAUUGAGAAGUGAACUGAUGGAACAAACUGACCC  
>N2665  
UUUGUGAAGUUCUGAAUAAACUGCCUUGAGAAGGAUGUCG  
>N2666  
ACAAAGAAAAAAAUCAAAGACUAUAGAAUUAUUGAAAAU  
>N2667  
AUAUCUGGUGUUCGAACCAGACUCCUGGCAGAAGUUGUGUU  
>N2668  
UUUUAUAUAUCUUAUUUAAAACUUUUCUAUAAAUAUUUU  
>N2669  
UUUAUCUUAUUUGACUCUGAACUCAAAACAUACCCCUUAC

>N2670  
AAUUAUAAUUGCUUUGCUGAACUUAAGCUUCUCCUUAUAGU  
>N2671  
CAAUUGGUCAGAUGCUUUGAACUGAUUAUGUGAAACUGACC  
>N2672  
UUCUAAUCUCCUUGUACAAAACUCAAGUCCAAGGGGAUCAA  
>N2673  
GCACUGCAAUCAGGAUGUAAACUGAAUAAAUAACUAAAAU  
>N2674  
ACCAACCACUGAGUGAACAAACUAGAUAUUGUCCAUAUAGU  
>N2675  
GGACCAUUCAGAAGUCAGAAACUUUAAGUUUUAACCAUGA  
>N2676  
CCAAGUUGGAAUCCUGAGGAACUUGUUUCUACACCAGCAA  
>N2677  
GCACCAGUUGCCUUCUGUGAACUCUGGGAAGCCUGGCAAG  
>N2678  
UAUUUGUCUAAGUAAUGGAGACUUUUUCCAUGCAAACCUU  
>N2679  
UAGGUGUCUAACAUAACUGAAACUAUGAAGAAAUCAUGUCUU  
>N2680  
UGACAAUGUUAAACCUAUUGAACUAAAGUUUUGCAUAAUUC  
>N2681  
UUUCUAUAACUCAGGGUAGGACUUUAAGUACCUACUACCUU  
>N2682  
ACUUACAAACUGGGUAAAAGAACUUCACUGAUUUACAUCUA  
>N2683  
AUCUCCAGAAAGUCCAAGAGACUUGGGAUGUGAGAGGCUAC  
>N2684  
UUUUAAUUUUUAUGGUUAUGAACUAUUGCUAUCUCAACUACC  
>N2685  
UAAAAGAAAAAUGUUUAAAGACUCUUCCAAUUGAAGUAUUU  
>N2686  
UUCAGUACAGACAUGAAAGAACUUCUACCAUAGUCACGAU  
>N2687  
AGAAAAAAAAAAAAACCCAAACUUAUACAAACAAAAUAGA  
>N2688  
CCUAUUCCAAACAUGGAAAACUCAGCUAAUGCACUUCUAA  
>N2689  
GGGCCUUAACUCAGACAUAGACUUAUGGUUAGGAUAUGUGU  
>N2690  
AAUUACUUAGGAAAUGGGAAACUGUCUCUGAAUAGUAGAC  
>N2691  
CUUUUAAAUGACAGUGGCAAACUGUACUUAAGCAUUAUAUC  
>N2692  
GUAGAAACAAAAGAAAAGGACUAAGGGAGAAAAUCUGAA  
>N2693  
CUAAGGGAGAAAAUCUGAAACUAGAAAACCUAGGAAAGAA

>N2694  
UUAGUGCAGAGUUCUGUCAGACUUUCAAGAGAGCUAAUU  
>N2695  
GUACAUGGCAGGUUAAGGGGACUUUAGGGAUAGUAUUUGAA  
>N2696  
UACUGCACACGUCUGACUAAACUUUCUCUCCUCUUGGAAAG  
>N2697  
AUAGACUUUUUCCAGUGCAGACUUCCCACACUCAUGCAAUG  
>N2698  
UGUUUAAGGUGUAAGGUAGAACUAUCAGAGUCAUUUUGAUU  
>N2699  
GCUCUGUAUCUAAUAAUUUGAACUCCUUGAGUUCUUUAUAUA  
>N2700  
AAAAUGCAUCCCUGCUGUGAACUGUCUUUGUUAACAUGUA  
>N2701  
UCAACCAAGUGGAAACAAGAACUAUUCAAGAAUUAACCAA  
>N2702  
GCAGAACAACUGGCAGGAAAACUGCCCCUGCACGUGUGCAG  
>N2703  
ACUUAACAACUGACACUGGGACUAUCUUUUAACUGGGCUGC  
>N2704  
CUAAAUGUGGUCCUUGUAAGACUUGCCUUGGUCAUCCUGUC  
>N2705  
UAUUCACAUUCUACCUGAAAACUACAAAGUAUCACCAAGAU  
>N2706  
AUGAGGUGACUCUAGCUCAGACUCCUAUCAGUUGGAGAUCU  
>N2707  
AAGAAAAAUUAUACCACCAAACUUCUGAAGACAGGAAUAA  
>N2708  
UAGAUAGAUGAAUUAGAAAAACUAUUUAUAAAUUUAUGAG  
>N2709  
AUACAGACAAUCCUAAGUAAAACUAGGUAGCUUGAAGUUUGA  
>N2710  
CAAUUCUGCACUGUGCCAAAACUUCUGUCUCUCCUAUACA  
>N2711  
UGAGAGGGCUGAGAAAGAGAACUGAGCUGAUGGGGCAUAGU  
>N2712  
UCUCAUUGUCAACACAAUAAAACUAUUUGUGCAGACAAAAAA  
>N2713  
ACAUGCAAGUCUUUCUUUGAACUCCAUCAGUAUACCAUGAA  
>N2714  
GUAGCUGAGUUUAGGCUUGAACUUUAGAUCACAUGCCACA  
>N2715  
AGUCUGUUGGUCUUUACCAAACUAUAUUUCUGUGACACAAA  
>N2716  
AAAUAACAUCUCUCUAAAAACUUGAUUUUAUUAUUUUUA  
>N2717  
GUUUUUUAACACCAAGGAAAACUAAACAGCUAUUAAAAUA

>N2718  
GUACAUUUACACAAUGGAGAACUACUUAGCUAUUAAAAAGA  
>N2719  
ACUAUGCUGGGAACAUAGGAAACUCACAGAGACUGAACCACC  
>N2720  
ACAUCAAAAUGAGUGAGCAAACUUGUUUCAAGGGAGUAAGG  
>N2721  
UCCAAGAUAAAAUUCACAGAACUCACUAAGGUUAACAAGUC  
>N2722  
CACAAACAGUGGGGAGAGUGAACUUGCAGAGUCAACCUCAG  
>N2723  
GAAGAACUAUGGGAGAGCAGACUGGGAUGGGGUUUCGACUG  
>N2724  
GUAAAGAACUUGACUAAGAAACUAGUUAGGAAAGGCAGAGG  
>N2725  
AGAAUUGUAGAAACGGUAAGACUUUUACAUGAAACAGGUUU  
>N2726  
CCCCCAAACUAAAUAGGUAAACUACAUCAAAGAAGACAGAG  
>N2727  
UGAGUGUAAAAUUAACCCAAACUCAUGGGACAUAUAUGAAGA  
>N2728  
UCCUCUCAGUGGUGGUUGAACUUUGUGAUAUGAUAUGCAG  
>N2729  
AAUGACAAAUAACUGGCCAAACUUGAGACCCAUCCCUUGA  
>N2730  
UUAAAAGUGAGAAUUUAUGGACUAAGAGACUCUGGGCAUCC  
>N2731  
UACAAAAGAAAAUAAAAAAACUUUUUCUCAGAAGCCUUUG  
>N2732  
UGUACCCAAACAAUUGCUAGACUAAGAACCUAUGGUUAAAG  
>N2733  
AAUAAAGUCCUAAAUUAAAAACUCAGUAACCUGGAGCAUGU  
>N2734  
UCUGGGUCUUUAGACAAUAAACUAACAACAUUAUUUUCUA  
>N2735  
UAAAAGCAGCAAUGAGAAGACUGGCUCUCAAUCCAGUGGU  
>N2736  
AAGAAAUGCAAACUGGGGACUCCUGGAGAUUCAAAGAA  
>N2737  
ACAUUACCUCAGAGUAAAAACUCGGACAAAGCUUCCAAG  
>N2738  
AUCAGUAAUCUGUGCCUCAGACUUUACAUCAUAGAGUCAGA  
>N2739  
UUUUGAAGUUACAGGAAUAGACUAUACCACCUAUGUUUUUU  
>N2740  
CUGUCUUUCCACUUCUAAAACUCUAAAUUGGUUACUAUUU  
>N2741  
UUUAGUUGUUGCACCCAGAGACUGAGUUACCAUUGUUUCUG

>N2742  
AGAACAAAAGCAAUUAUGAAACUGGAACUAAGACAAUGCUU  
>N2743  
UAACUGAGAAGUUAUUUCAACUGAUAACUGUGGGGAGCGG  
>N2744  
CGCUCAGGCUGGUAAUUCAGACUGGGAUAGCAACAUGCUUU  
>N2745  
GGAGCUGCACAGCACUCAGAACUGUGCAUACUGGUUUGUGA  
>N2746  
AUCAGAUCCUUCUACAAAAGACUAUACUCAACAAAACUGGA  
>N2747  
GCAGGGGAUGGUUAUAGGGGACUGUCAAGGCAAGUCUUAUA  
>N2748  
CAAAGAACUGAAGAAACUAGACUCAAAAACCAAUAACCCU  
>N2749  
UCAUUUAAGUUGAUAAAUGAACUUUUUCAAGGUUAUAAUAA  
>N2750  
AAUCUAUCUAUAGGAUAGGAACUUAUCUGUGGGAUGAGAUG  
>N2751  
AAGAAGUAAUUGGACAAAGGACUUGGACCAUGAAGCUGUUU  
>N2752  
AUUGGAAGUCACCUUAUAAAACUCUCCCAUGGUUUCUUUGU  
>N2753  
AAAACCUUAAAAUCAUGGAAACUGCAUAGACAUUUAAGAUC  
>N2754  
AUUUCACUUACAUGGUUAAAACUACACCAAGAUGC UUUAUG  
>N2755  
ACCAAACAGAAUAAAAGAAAACUGGUUAUUAGGUUUUAAAA  
>N2756  
AAACAGUAAAUA AAAAUAAAACUAUUCUUUUUUUCUGACAU  
>N2757  
GCAUGCAUUAUUUUCAUGGACUAAUGCUAUCUGGUUUUAUA  
>N2758  
AGCAAGUCUGUCUUCAGGGGACUCAGCCUCUCUUUCUGACU  
>N2759  
AAUUUACUUAGUUGCUAUGAACUUUUUCAUAACUUAAGAUAA  
>N2760  
AUUUUCAAAACCUAUACCAAAACUUAUUGAAUUAACAUC CCC  
>N2761  
UAUUUAUUUUAAUUUUAGAAACUAAAGGUAAAAAUUGGUAA  
>N2762  
UAACCAAAGAGUAUACAUGGACUCUCCAAGGUCCCUGGAA  
>N2763  
GUUGUAGGGCAAAGCAGAAGACUCAUUUGUUAUUAUGAGGCA  
>N2764  
UGCAUGCCAACCAAUGUCAGACUUAACUUAAGGCCCAGAAC  
>N2765  
ACUGAGCAAAGCUAACAUGAACUCACAGAGUCAGGGACAGC

>N2766  
AGCUUACCCAAGAGGGGUAGACUGCAAGAAAUAUCAAUU  
>N2767  
AUGAAUGGAACUAGGAAAAACUCAACCUGAGGCAACUCAG  
>N2768  
AAUAUAAUACUACAGUAGACUGGGGAAGGCAAGGAUGGG  
>N2769  
UUUAGCAGCGGGGAAUUAAGACUCAAUUACUUUUUUUUUU  
>N2770  
UAGUGUAGCAAAAGUCAGAGACUUCAAAUUGGGUAAUUAU  
>N2771  
UAUUAAGUUAUUUAAGAGGACUUAUUUAUGGUUUCAUAAU  
>N2772  
AAUAUUAGUAUUUAAGGAAAACUACUGAUCCAUGUAUUA  
>N2773  
AAGUGACUGUAAUUUAAGAACUCUGUACAUAUGGAAAAUU  
>N2774  
CACUAUAUAAGUAUCAGAGGACUGCCUCAUCAGGAAUCAU  
>N2775  
AGAAUUUGGUAUUGUUGGAAACUUUUGCUAUAGCUGUGUUA  
>N2776  
GAGAGACCAAACUGUGGGAAACUAAGCCCUGCAGUUACUCU  
>N2777  
UUUUUUUGGAAAUAAGCUAAACUGCUCAGCAAUUAGGUGA  
>N2778  
UUACAAAGUGUCAUAUCUGAACUAAGUUUGUGUUAUUUU  
>N2779  
UUUAAGAAUUUGUUGGGAAACUGAAACUCUAUAUUUUAAA  
>N2780  
ACAAAACAAAACAAAACAAAACUCCUAUAUAGAAUUUGGAG  
>N2781  
UUUACUAACUGCCUACUUGAACUUGGCUGCUCAUGUGCAUU  
>N2782  
UGC UUUCUAACUCUGUGAAGACUUGGAUUGGAAUAUCGACA  
>N2783  
GGUAGGGAGAAAGUGGGCAGACUUCUCUAGUCCUGAUUUC  
>N2784  
UUUCUCUGUAUAGCCCUGGAACUCACUCUGUAGACCAGGUU  
>N2785  
AAUCCUACAUCUGAUAGAGGACUAGUAUCCAUAUAUACAA  
>N2786  
GGAGGAAAGGUCAUCCAGAGACUGUCCCAUCUGAAGAUGCA  
>N2787  
CUAGAGAAAGGAACCAAGGAACUGAAGGGUUUUGCAGCCCC  
>N2788  
AAUUGAAAAGUCAUAUGAACUACCACCUUUGGCUGAAC  
>N2789  
AUAUGACCAGCUCAGUCCAGACUUAAGCAGAAUUAACUAU



>N2790  
CCCUCUUUAUACUUGGCAAAACUUUAUCAGGAGAAACAAA  
>N2791  
UUAACAAGCAAUUCAUCUAAACUGUCAGUUAAAUGAUUAAA  
>N2792  
UUCUCCUGUCUUUAUACUGGACUCCUAUAACCGUCCAUC  
>N2793  
GUAGAUGAGGCUAGCCUCAAACUCAGAAUCCGCCUACCUC  
>N2794  
GUUAUGGGUUUUUAACCAAACUUCAAAAGAGACACAAA  
>N2795  
UUGUCCCGCAGUCAUGUGGAACUGAGUUUAGUGGUGUCAGC  
>N2796  
AUGUAUGUUAGAUGCACAGACUCAUACACCCACAAGAAGA  
>N2797  
CAUGAAGGAGAUUGAAUAAACUCACCAAAAAUUCAGGUGC  
>N2798  
UCUGUGAACUCAUUCUGUAGACUAGAUUGUCCUCUAACUUA  
>N2799  
UGACUUUGUUAAUAAGCAGAACUGUAAUCAGUAAUUAUCA  
>N2800  
AAAAAAUUAUUAAGGUGAACUAAUAUGAAGUUAUCACA  
>N2801  
AAUUUAUUCAAAUAUUGAAACUAUUACUCAAUAUCAUGA  
>N2802  
UGUCAGCUUCUGUGGUGCAGACUCUCACCUGUGCAGACUAA  
>N2803  
GAAGUGCAAUCAAACAAAACUGAGAUUCCACUUUACACC  
>N2804  
UAAGGUCCUAGCACUAACAGACUCUCUUCUAUAUCCGUGAC  
>N2805  
AUAGAUCAGAGUGUUCUAGAACUCAACAUCUACUUGC UUUG  
>N2806  
AGGUGAACAGCACUUAUUGACUCUCAAAGAACAGUGUUUUUU  
>N2807  
UGUGGGCCAUGUGCAGACGAACUGGCACUCCUAGGUCUCUUC  
>N2808  
GGAGUCAGCCCAGACCAGGGACUUCACAAAGUCCUUCAGUG  
>N2809  
AUGAUCUCCACAUGAACAAACUCACAGUCUACA UAAAACU  
>N2810  
CUGAAUAUGUGUAGUAUUAAACUAAUUCUGAGUGAUUUUUC  
>N2811  
AUAUCCCUAAAGAAAUAAAACUGUCAUUAUUAUCUCCCA  
>N2812  
CAUUGCCACUAAAAGCAAGGACUAGGCAAUGCUGCCACUC  
>N2813  
AAGCCUACUUAAUUGCUGAACUUUAAUAAAAUAAUAGUG

>N2814  
UAGGUCUGAUAGAACUCUGAAACUAAAACCACCUGGCCUGG  
>N2815  
UUUCCCAUCUAGGCAGUAAACUCGUGACUUGGUACCGCUC  
>N2816  
UCAUUCUCAAGCAAAGAAAAACUUUAUAUGGAAUUUAAUGA  
>N2817  
AUGUGCCUUUGAAAAUUCAGACUCUAGUUUGAUACCGCUCU  
>N2818  
AUUGGGGGACCCACAUGAAAACUGAGCUGCACAUCUGCUAU  
>N2819  
UCUCAUAGAUGUUUGCAUAGACUACAAUUGCAAUUACCUC  
>N2820  
GAAAGGGGAUAACAUUUGAAACUUAAAUAACUAUCUAAUA  
>N2821  
AACAUAAUAGCUAUCAAAACUAUCCUAUAUAAAAGAAUG  
>N2822  
AACUUCAGUGAAGCCCAUGAACUUAGCUAAAUUCCACAAU  
>N2823  
UUUCCUUAAUAUAUAAAAGAACUCCAAUAGAGAGCACACAA  
>N2824  
UUUACCUCUGACUUGCAAGGACUCAGUACCUCUGUGCAUCA  
>N2825  
UUUGUGUAAGAAUAUCUAGGACUUGCUGUAGUGAGGUAGCU  
>N2826  
GCAAUAAUAAAUAUUGAAACUUUUAAUUCCAAUUACUUU  
>N2827  
CCAAUCCACCUUGGGUACAAACUCUGCAGCCAGUCCCACAG  
>N2828  
ACAUCAAACUGAAUAGAGAAACUUGAAGCAAUCCACUAAA  
>N2829  
UGGAGUUCAGCUUCUUGAGAACUUUGUAUAUAUUGGAUAAU  
>N2830  
GGGAUUCUGUGUGUUUGAACUUUAGUAAAAAUUAAUUUA  
>N2831  
GAUCAUUUUUGUAAAUAUAGACUUUUUGGAUAUAUGUAAAGA  
>N2832  
GAUAAAGGGUUGAAAUGCAGACUAUGUAAAAAAUUGCAAAG  
>N2833  
UUCGUAGGAUAAUGAUUCAACUAGGUAUCACUGUGUUAAA  
>N2834  
CCUCCAAGGAACCCUUCUAAACUUCUCUCCCAUCUUCUCUC  
>N2835  
GAUCCAUCCUUAGAAAAAGAACUACAGGCAGCUAACAAUUG  
>N2836  
GUUCUCUCCUGUGGAUCAGGACUAAAUCAAUCAGAAGCCU  
>N2837  
AACAUCAAAGCAGAUGUGAGACUGGAUAAGCUAAGAAUUCU

>N2838  
AUGCUUUUGCAUUACAAAAGACUUUUUGAUAGGAAUGCCUUU  
>N2839  
AGCUGGGAGGCAAGCCGGAAACUAGGCGGUGGAGAGAAAA  
>N2840  
AUGGACAAGGAGGACUUCGAACUGCUUUUGUGGAUCAAUCG  
>N2841  
AAGGUCACCUUUUCAUUAGAACUUUACCUUUUCAUUAGCUU  
>N2842  
CCAAAAGAAGAAGAUUGUAAACUGUGAUUUGUAAAUUUAUC  
>N2843  
GUGUAUAACUCAAUGAUAAAACUACUAUGUAGUGUGUAUUA  
>N2844  
UCAACUUGAGCCUUGGCUAAACUUUGUCCACCUUUUGCAA  
>N2845  
CAUACAGUAUCACUGUAGGGACUCAACCUGAGUUAUGGUAA  
>N2846  
GUGAAUUAUCAGAAGUAGGAACUGAUCAGGCGGUUGCCGC  
>N2847  
AACAUUAUUGAGGAAAGGGGACUGCCCAGCGGAGAGCGCU  
>N2848  
ACUGUCAAUAAAGACAAAAGACUACCAACAGAUUGGGAAAG  
>N2849  
UGCCUUUGCCCCUAUUUAAAACUUACUACAGAGGAGUUGAA  
>N2850  
CCAACCCACCCACUCCUGGACUCUUCCUAUUUUUACACCU  
>N2851  
UAGGAAAAAAAUGUGAAAGAACUCAGAAGAUCUCCAUGC  
>N2852  
CUUGACAAUAAUUUACCUAAACUACAGACAGACUCACAAAA  
>N2853  
GAGCAUCAAGAAUCCAUAAGACUAAGUGCCUCCUCACCCAC  
>N2854  
UUGAGAACUCAAGGGAGGGACUUUAGAUGAAAUGUCAAAU  
>N2855  
AACUGGAACUCUGCCCUGAGACUGUGCCACUUCGAAAGGCA  
>N2856  
AUUGUUUUUUGUCUUGUGGAACUGCAAUUUAAAAUCCAAG  
>N2857  
AUUGUUGUUUUAAUUUGUAAACUUCAUGCUUGGACUCCUCA  
>N2858  
CAGACAUC AUGACAAAGGGAACUCUUAUAAAGACAAUGUUU  
>N2859  
GAAUCCUGAU AUCACCAAGACUUUAAUAUGUAGGGGU AU  
>N2860  
GUGCUGCUUGUUGUGUGUGAACUAUUCCAAACUGAACUGA  
>N2861  
UCCACUCAGCAUCUGGUGAACUCCAACACAGAAGUGACAU

>N2862  
UCAGAAAUAAACACACCUGGACUAAUUGUAAAUGUUUUUAU  
>N2863  
UCACAAAUUUUAUCAACAGAAACUCUCCAUAUACUGGAGGAUC  
>N2864  
UGUGCCUCCAUAUCAAAGAGACUACACAAAGGUUCCUAGA  
>N2865  
AGAAAUGUUAAAUUUAAAAACUUCUGACAAAAGUCCAC  
>N2866  
UCUCAAGUGUGGCUUGGCAAACUAGAGAAGUAGUCA AUGAC  
>N2867  
CAAGUGGAUCCAUAACACUAGACUAAGGAAGGUUAUAGGGUGU  
>N2868  
UGAGAAAGGCACAGCUGAGAACUUCUCCUGGCAUUCUUGUG  
>N2869  
AAGGAGUGAAAGAGACAAAGACUGCAGCUGAGACGAAAGGA  
>N2870  
AUGAGUGAGUUCAACACCAAACUCGUUUUUUAAAUUUUUAU  
>N2871  
AGCCAGGGCUAUACAGAGAAACUCUGUCUAAAAAAAAAAAA  
>N2872  
CCCUGAGAAAACUGUCAGAGACUGAGCCAGCAACCAAAGAG  
>N2873  
GUUCCAUUUCAUGUUGUGGGACUUAACUCUACUCAGACAUU  
>N2874  
ACAAGAGAUGGACAGUUCAGACUCUGUCUCCCUCAUUUUUU  
>N2875  
GUGCUGGAGAAACAACAUAGGACUAAGUAUGCAGUCUUCAU  
>N2876  
UUAAUUUUUAUUUAAGUAAGACUGAUUUUAUUUAUCAUUG  
>N2877  
GAGGAGUAGAAGGAAGAGAAACUAUAUGUGGGAUGUAUGAU  
>N2878  
AGACAGGCCACUAACAGCAAACUGUCACACACCAUAGUCUC  
>N2879  
UAUUGACCGAGGUAAGGAAAACUAAUGUUAACCAUGC UUA  
>N2880  
CCCAUUUCACAGUUCGAAAACUGUUAGUGGAUGUGUGGGU  
>N2881  
AGCACAGUAUGAGGCACUGGACUGUCUGCUUCAAAUAUGAG  
>N2882  
GCAAGACCAUUGACUUCUAAAACUGAUAUCAUAUUGC UAAAA  
>N2883  
UGAACUCUAUUUCAUGGAGACUUGAAUUUGGUAGCUGAAU  
>N2884  
AAGAAUAGAAUUUAUCAAAAACUCUAGGAUUUAUUCCUAUU  
>N2885  
UCAGUAUGUUAGCUUGCAAAAACUCAGACUAGGAAGGAAAAA

>N2886  
GGUUUGUGUUGCCCAUACAGACUGAAAUUCAUAAAUCCUGU  
>N2887  
CAUUUCAAAAAACCACAAAGACUGCUGAGAAAGGAGUCUAU  
>N2888  
GUAGUUGAAGAAUCAAUCAAACUGGAUGAGGAAUGCAUUA  
>N2889  
GCAUAUCAAGUUACAGUAAAACUAAGCAUAUCUCCUCAUUA  
>N2890  
GUUAAUUUGGAAAAAAGUGAACUAAAACACCUGUUAGGAAU  
>N2891  
GAUAGGGUUUCUUUGUGUAGACUUGCCUAUAGUGGAACUAG  
>N2892  
GUUUAAGUGGAAUAGCUAAAACUCCGUUUAAAUAACCUGCA  
>N2893  
AACUCUAAGAACAAAUCAGAACUAAACAAAACAAGCAGAGA  
>N2894  
AAAAGACAAUGGGUAUUCAAACUUAUUUCAGAGUACUUUAA  
>N2895  
AUGCUUCUCUCCAUAUAAGAACUUAUUAAUAAUGUAUCCCU  
>N2896  
UGACACCCCUCCCAUUUGAACUAUUAAAUUCUUAUACAA  
>N2897  
AAAAAAGAAAAAAAAAAAAACUAUGAAGACACAGUUGAAA  
>N2898  
UGACACAAACUGGAUAAGAAACUGUCACUGAUGAUGUGUGA  
>N2899  
CCCAGACACACACCUGAGAACUCUGUUUAUGGCAAGCUAA  
>N2900  
CUCUGUUUAUGGCAAGCUAAACUCAAACUAUAGACUUUGAG  
>N2901  
GCUUUCACAAUUUUUCUGAACUUCUCUGCUAAAUAUACC  
>N2902  
CGCCGAGUUAACAGGUAUGAACUAUUUCAAUCCUUAGUUU  
>N2903  
UUUCAGAGACACAGUUUUAAACUAUCUGAAGGGAUUUAUGCU  
>N2904  
UCAAGUCAAAACUAUGAUAAACUUUACCUUAUAGUGAUCAU  
>N2905  
AUCUCCAGAGGAAAUCAAAACUCGUAUCAAACUCUGGCU  
>N2906  
CUUUAUUGUUUAUAGAAGAAAACUGAAGACUUAGGGUCUAAA  
>N2907  
AAAAAAGAAGUCUCACUGGACUAAAGUUAUCCCAUUUAUUAU  
>N2908  
GAAUUGUGCAGACUGUAGAAACUCCAUAAGGCAACCGGUGUU  
>N2909  
GUGUGCACCUGUCACUUUAAACUGAGGUUUCUCAGUUUAAA

>N2910  
GGCAAACAAGACCAGUAAGAACUCGAGGGGCACUGAUAAAUU  
>N2911  
AGGAACUGUUAGCUAAACAAACUCCUUCUUUCCCAACUUGC  
>N2912  
UAUCUAAUAAAAAAAAAAGAGACUGAACUUUUACUGUGAGUU  
>N2913  
CAGGCACUAUUAGAUUGGAGACUCCAGCAGGGACAAUUAUAG  
>N2914  
GUCACCUUUUAAUUGGGUGAACUCUAAUCUGCUAGCAAUGC  
>N2915  
AUACGUUGUAAUUUUUAAAAACUGGCACUUGAACACAAAUA  
>N2916  
GCUUGGACCAAUACAGGAGACUAGAUAGGUACCUAGGUUA  
>N2917  
UAAGAAUUGCCCAGAACAGAACUCUGUGUGUAUGUGUGUAU  
>N2918  
UAGCCAUUUUGAGUCUAUGGACUGUAGCAUGAAUAUUCUUU  
>N2919  
AACCCCAAGGUCCCUAGAGGACUCUCCAUGUGAUCCUAGGA  
>N2920  
AAACAACAACAACAUAUAAAAACUGUAUAGCACUGGGUGAUG  
>N2921  
GAAAGAUGAAGCUAGCUUAGACUCACAAUCAGCAAGAAUCU  
>N2922  
UGCCUCACAGGAUCUCACAAACUAUUCAGUUUCAGUGAUAU  
>N2923  
ACAGUAGUGAUCAAUGUGAAACUAGGUGAUUUAAAGGUAGC  
>N2924  
GGCAUUUUGAGUGAUGCUAGAACUAGGAAUCUGAGGUAAGAU  
>N2925  
CAUAGUAUAGUGUAAGACAAACUUUCCUAUCGUCAAUACAG  
>N2926  
CUCUCUCAACAUGAGCUAGAACUAAAAUUAACAUAGAAAU  
>N2927  
AUACAAAUAUAAUCCCAGAACUUGGGAGGCAGAGGCAGGC  
>N2928  
UAUAAAUAUCUACAGUAAAAACUAGUGUAGAGGAAAGAAAC  
>N2929  
UCAUUGAGAAGGAGUAGAAAACUUAGAUUAACCCACAGC  
>N2930  
UGAGUAGCCAAAUGUAGAAAACUUCAGCUGGAUCAAUACCU  
>N2931  
GGGAAACACAGAUCUGCAGGACUCCUUGACAAGUCAAUUA  
>N2932  
CUUCAAUUCUAUCCAUUGGACUACUUGUCUGUCUCUAUAC  
>N2933  
CAAUCAUAAGAGGCAGAAAAACUUUAACAAAAUCAACUUC

>N2934  
GAGAUUUAAAGUGUGUCAGGACUCUUGCAAGACCAGUUCUC  
>N2935  
UCUAUCUCAUGACAAUACAAACUUAUUUAAAAGGAUAGCCA  
>N2936  
CACUGAUGGAAUAUGUUAAAACUUUCUGUUUAUGGUAAAUU  
>N2937  
CUGGCACAUAGAAAGCAGAAACUUAUUGCUUGUAAUAUAGU  
>N2938  
GAAGUGUGGUUAAGAUAUAAACUUAUAGAACCUUACUUGCAA  
>N2939  
UUUCUAGUUGGUUUCAGGGAACUUCUUUUUCUAGCCUUA  
>N2940  
AAUAAUAAAAGAACACUCAGACUUUCCCCACCACACACAAA  
>N2941  
UUGUGAUAAGGUAAUUAUCAAACUGUUGAAUUUCUAGUAAUG  
>N2942  
UUCAUAGAUUCCUUGGAGAAACUGUACUACAGCAGCAAAGA  
>N2943  
CAACAAAUGGUGUUGGUCAAACUGGAUGGCUGCAUGUAGAA  
>N2944  
CAUAAGUUGGGCCGGGAAACUACUAAUGACAUCUACUGG  
>N2945  
CCAACAUCACAAGAAUUUAGACUGGAUUGGUCUGAGUAUCC  
>N2946  
UCCCUCUCUCUAGCGUUGAGACUGCAGAUGAACUAUUUGCC  
>N2947  
AAGUACCAGUUAAUUGGAAACUAAAGAUAUACUCUUUUUC  
>N2948  
GCAUAAAUGAACUUGCAGAGACUGGAGCAGCAUGCAUAGGC  
>N2949  
UCUAGUCACAUUCUUAGAGAACUAAGCCAAUCCCAGUGCUU  
>N2950  
UUCUGGUUAAUUUCACUUAGACUAGUAUGUUCUACCAAGAG  
>N2951  
GUGAAUUGUGGUUUUUUGAAACUAUCUUCUAGUAGCUGUCC  
>N2952  
GUGAUUAACAAGAUACCAGAACUAUCAAGUGAAACCUUUG  
>N2953  
GUUGACAAGGGGUCUAUUGGACUGGCUGGGUUUAUGUGUCA  
>N2954  
CAAACUCUUUGUCAGAAAGAACUUGGCCAGGUAGUCACUUG  
>N2955  
CCAAAGGCUGAUUGAUCAGAACUUCAGUUUUGUGAAGCUUU  
>N2956  
UUUACAUGUUGCCUUUUAAAACUCUUCUUUUCUAGUAAA  
>N2957  
CUUGAUUUUAAAAGCCACAGACUUUAUGAGGUACAUAUAUGA

>N2958  
GUAUAUUGUUAAAAGAGGAGAACUUGGAGUGAGACAGGAAGG  
>N2959  
UUCAUAAGGUUGUUUAUAAAGGACUAAAGGUAGCAGCUGGAAA  
>N2960  
CUUUGAAUGGGAAGAGUCAAAACUCUUCUCCUCACCUCUUC  
>N2961  
GCUGGGUUUGGAAAUAAAAGACUAGGCUAUGGAUGAGCCUA  
>N2962  
UCAGACAUUUUUAGAUUUAAACUUUUCUUUGACAGAUGUAU  
>N2963  
UAAAACUACUUUGAUUCAGAAACUGACUGCAGAAAUCAUUCA  
>N2964  
CUGUUUAUAGUCCUAGUGUAGACUCUAAAAUACAUCUCUUA  
>N2965  
CUUGAAUGCUGUCUACCAAAACUUUAGAACAACUAAUCAAU  
>N2966  
AUGGUGCCAUUCUUAUUCAAACUACCAUAGGGUCUUGCCAU  
>N2967  
GUAAAUCUAUGAGUACAUGAACUGGUAUUGUUUAUUAUAAA  
>N2968  
UCAGAAGUCACUACAUUGAAACUCUUUGUAAACUGCAUGUG  
>N2969  
AAAUAUAUUAAGCACACAAACUUAUACUAUAUUAAGUAG  
>N2970  
GGUAAGAGUCGAUCUUAAGACUUUAUGCUAAAGUUAAGAU  
>N2971  
GAGUAUGAUGACAUGUUUAGACUUAGGAGAAUACAUUGUAA  
>N2972  
AGCUGAGUAAAAGAUAAUGAACUUAACCAGUAAUAAUAAUA  
>N2973  
AUCCCCAACCUAGACAAAGACUCCCUACUAGAUCAGAAGU  
>N2974  
AAAACAAGUAGUGGGCCAAAACUUCAUGCUUGAAUUAUACA  
>N2975  
UGUACUUUAUUCACCUGUAAACUGGGUCCAAGUGACAUCAU  
>N2976  
AUUAAUGGGUAAAGGUUAAAACUUUGCACAGUGUUCUAUGA  
>N2977  
CAUUAACAUGUAGAUUAUAAAACUGGGAAUAUGACUAAAAU  
>N2978  
CAGACAUCUUCUGGUUAAGAACUUGUCUUAUGAGGAAGAAG  
>N2979  
AUGGUCAUGUGCAAUGAAGAACUAAUUUUCUUUUUCUUAAC  
>N2980  
AAGUAAAGUAUGAAACAAGGACUUACUGUGUAAACUUUGAA  
>N2981  
UAGAGAAUCUACCAACAAAAACUGCUAAAGGAUAUUCUGUA



>N2982  
CUUGGAAACACCUGCUAAAAGACUAAUUAUGUGCUGGUCAUU  
>N2983  
GCUUAGCAACAGCUUGACAAAACUCUGCAUCACACGGCCUCA  
>N2984  
CCAAGAUUACAUCCAAUAGAACUGAUUCUAAAUAUGACCU  
>N2985  
GUUUGACACGCUAUCUUGAAACUUGCACCUCUUCCAUCU  
>N2986  
UCUUUGAGACCAGCCUUAGAACUCAGUAUUCAUUCCAAUAC  
>N2987  
UGGCACAUAAGGGAUAAAAACUUCAAUAACUCACUUUGGA  
>N2988  
CAAUACAAGACUAUAGAAAAACUUCUGGCAACAUAACUU  
>N2989  
AUCAGCUUUCUUCUCUGUGAACUGGAAGGAAGAAUAAAACC  
>N2990  
GUACAUUUCUUCAGCCUGAAACUGAGAACACAGAGAGCUCC  
>N2991  
UUAUAGAUCUAAAGCAGAAAACUCAGGAGAAAAGAAAAGAA  
>N2992  
UUCACACAAAAAUACCCAAACUGGCACUAGGGAUGUAGCUU  
>N2993  
CAGGACCUUUUAUUAUUGUGGACUGGAGGAGGGCUCCAUAU  
>N2994  
UAAUGCUGUUUCACCAAUGAACUUAUUUAGUACUUAUACUG  
>N2995  
CAAAAAGUUCUACCAAAGAACUUCUCCAGCUGAUAAACAA  
>N2996  
CAAUAAAUGUUGCUGGUCAAACUGGCUAUUUGUAUGUAGAG  
>N2997  
GGAGGGGGAUUGGAUCAGGGACUCUGUGAGAUGGGGAAAGG  
>N2998  
GGGAUCUCAUAAUUAUAAUAAACUGAAAGCUAGGAAAUUAU  
>N2999  
GAAUUACACUAAGAAAACAAACUCAGAAUAAAUAGUAAUAA  
>N3000  
CUUUUCUUAUUUUCUGCAAACUAAUUUGUGUUCUUUGCCA  
>N3001  
UUAAAUAUCUAAAAUUAAAAACUAAGUUCUUAUCACUCAGU  
>N3002  
UUGGGGGUGUGCAUUAGUGAACUUGAUGUCAGCAGGUCAGA  
>N3003  
AUAAAACCUGCUCCUUUGAACUCCUCUGCCUGCACUGAA  
>N3004  
UUAGUCUCCAUCUGGGUGAAACUAUGAUUGAACCUUGGAUA  
>N3005  
UACAUAGAACUACAUAGAACUACAUAGAACUACAUAG

>N3006  
CUACAUAAGAACUACAUAAGACUCCUUGGUGGGGCUGGAG  
>N3007  
UUAGUGUAUGAUUAUUCAAACUAUAAUUAUCCAAUAAAUA  
>N3008  
UUAACUCAUCUGAUGCCAAAACUCAGGAAUAACUAAAAGA  
>N3009  
UGCUCCAAACACGCUGCUGAACUAAUUCUCCUAUGGUAUGU  
>N3010  
AAUUCCUGAUUAUCAUGAACUUUAAGGACUUCUUUCA  
>N3011  
UGAAUACAACAGACACACAGACUAUAUAUAGGACUCUAGAC  
>N3012  
UAUAAAAACAAACAUUUCAAACUAAAUCUUGACACAGUAAA  
>N3013  
AUUUUAUCAUGAUGGUUGGAACUCACUCAGUUAUGUGAAUC  
>N3014  
AAGAUGAGGGAACAAAGAAGACUGCAAAGUAGAAUUUCUU  
>N3015  
GAAUAAGCCAGAGGAUGAGAACUAGCUAGAUAAUUAGAAUA  
>N3016  
AUUACCAAAGUGACUGUGAGACUAGACAAAGCAAUUCAUUG  
>N3017  
AUAGAAAAACAGAGACAUGAACUGAGAUUUCAGAUGUAUUC  
>N3018  
UUGAUUAGAAGAGACUAAAGACUCCCCGAACAGUAUAGGCU  
>N3019  
AAACAUGUAUACAUAUGUAAACUUACUUCUAUAAAAGCUAU  
>N3020  
AAUUGUCUCAAUUGGUGUGAACUCAAGGGCAUGCAAGACAU  
>N3021  
ACACACACUAACUCAUCAAGACUGGUUAGUGCUUUACCUCA  
>N3022  
UUCAUUAUAAAUCUCAGAGACUGAAAACAUUCUAGGCCCA  
>N3023  
AAUGUAUGAGCAACACAGAAACUCCAAGCCUACAUAAAAG  
>N3024  
CCAUGAUGUGUACUUUCUGGACUUUAUGAUGGUGCAAAGA  
>N3025  
AUGUGGUAGAAAGGCAGGAGACUGUAGAAUAUUGCCUAC  
>N3026  
ACCUUAAAUAUAGAAGUGGACUUCCCAGCUCCAUUGAGUU  
>N3027  
GGUGAGUGCUCACUGGAAGACUAUAAAACAGCAGAGGCUG  
>N3028  
CUUUUGUGGUUCCAUAUCAAAACUUAAGGCUUUUUUUUUUC  
>N3029  
CGGGUGAAUAAGGAUGUCGAACUUUUUUUUUUAUGUUUCU

>N3030  
UACACACUUGAAUUGGGGAAACUCCCAGCAGCUGGAGUAGA  
>N3031  
CUCCCAGCAGCUGGAGUAGAACUUCGGUAAAGGAAGCCUUU  
>N3032  
CCUAAAGAAGACUAUUUUAAACUGAACCUAUACAUUACCU  
>N3033  
UUUAGCAAACAGUGAUAGAACUGGAAAAAAAAUUGAAAGGU  
>N3034  
GAGUCCUGUCAAUUUAAGAACUUAUAACUUAGGAAUUUA  
>N3035  
AGCACUUUGAACUUUGCUGGACUUAACCAUAGUGUCACAAA  
>N3036  
CACUGCUGGUGAGAGUGCAAACUUGUACAGCUACUUUGGAA  
>N3037  
AAAGUGUUUUAAUAAGAAAACUCAAAUUUCAGCACAAGCU  
>N3038  
GGUUGAGCAGGGGGUUAAGGACUGGAAUACCGCUGAGAGUA  
>N3039  
AACAUUUUUGGCUUUAUGAACUAAAACUUACAUACUACUA  
>N3040  
AAUAAAAUAAAAUUUCUCAGACUGUGAUGAGGAUUAAAUA  
>N3041  
CAGAGGACUACCGGAUAUGGACUCAGUCAGAGAAGAUGCAC  
>N3042  
AUAUGGGUUCAGAGCUCAAACUUCCAUGACGAGUUUAUUG  
>N3043  
GGGAAAACUUCAGAACAGACUCAAAUCCAGACCAACAUC  
>N3044  
GGCUUGCAGCAAACCAUUGGACUGAGCACAAAGUCCUCAU  
>N3045  
AAUAUAACUAUUGACUAAAACUUACGCUAGAUGUAUUUA  
>N3046  
AUGCUGUAUUAGCAUUAGAGACUGCCAGAAUUAAGCAG  
>N3047  
UGGCACAAUGCUGGAAUGGAACUAAUUUCUUAGCCUUAGUG  
>N3048  
UCACUAUCAAACACUUGUGAACUGCAACAAGCACUUUUGAU  
>N3049  
UCAUGUCUUUUAAUAAUAGAACUCCUGAGUCUAGCUCCACA  
>N3050  
AGAAACUGUAGGGGAAAAGACUAAUUCAGAAGGAAAUGUA  
>N3051  
CCUGGUACUGUGGAAGCUAGACUGCAGCAAAAAAAGGUUUC  
>N3052  
GGGAAUGGAGGGGAAGGGGACUGGAAGGAAAGGGAUGGAA  
>N3053  
GUUUGGUGAAGCAGCCCCAAACUCUCAUUAAGAGAGUAUUU

>N3054  
AGAGAGAGAGAGAGAAUGAAACUGUACAAAAAGGAAAAGU  
>N3055  
CAUCCAUC AUGACCAAGUAGACUUCAUCCCAGGGAUGCAAG  
>N3056  
CUGGGGCGGGGACCUCCAAAACUCUCCAAUCUAAAUGGACA  
>N3057  
UAAAUUAUCUAAAUGGGAAACUCAGAUAGAAACUCUCCC  
>N3058  
UUCUUUUUCACCUACCAAGAACUACUGAUAGCAGCUUUGAC  
>N3059  
AAAGGGCAACAGAGCAAGAACUUAUAUUUGAAAAAUAAA  
>N3060  
UCUAACAAAAUAAACUUCAAAACUGAAACUAAUAGAAGGGGA  
>N3061  
AGAGAGAAACACACCAAAGAACUUAUGGUACUGUCCAGCU  
>N3062  
UAUGUGCACUAUCCCUAUGAACUGUGUUUAUGAAAAAAU  
>N3063  
ACUUCAAUUUAUCAAAAAAGACUUGAUGGAGCUUAUUUAUA  
>N3064  
GUUUUACUUUAGUUGCUIAAAACUUUCCAAGAUUGAAUCUU  
>N3065  
AGUUCUAACUCAUUGCAGAAACUGCAGUGCACACAUACACA  
>N3066  
AUUAACUCAGGAAUACCAGAACUAGUGUGUCUAGCCAUGG  
>N3067  
ACUCAGAUUGUAGAACGUGAACUUAUUGUUAAAAUUAUAGA  
>N3068  
ACCCACCUUAUAUGUACUAGACUAAGGACCUUUUAGAGAUG  
>N3069  
AAAGCAUCACUUGGAGAAGAACUAGUUCUGGAUGUAAAGGA  
>N3070  
AAAAAGAAUCAUCUUCUAGACUCCCUACAGCUGCCUUCAU  
>N3071  
CCAUCCAUUCUGGAAUGUAGACUGCCCUGAUUUUAUGUUGU  
>N3072  
CUUGGAUUUGGUUAGCAAGAACUUUAUUGAGGAUUUUUGCA  
>N3073  
UGGGACACAAGCACCCAGGAACUCAGCCCAAUCAUGACAU  
>N3074  
AUUACCCUAAAAAGACAUAGACUAAGAGACUGGAUUAUUAA  
>N3075  
ACAUCAUGCAGGAAUGACAAACUGUAGGUCUGAUUAUAUAU  
>N3076  
AAUACAUGCUGUGCGACUAGACUGGCCAGAUACUGCUAC  
>N3077  
UGUCUAUGCAUAGUGAUUAAACUUAUUUUCUUAUUAAAAUAU

>N3078  
CAGGAAGCAACCUUACUUAACUCUAUUUUGGGUCACCUCUA  
>N3079  
CAGACAAGAGAGUAAAAAGGACUUGAUAAGAUUAAAAUACA  
>N3080  
UAUACCCGAGGUGAUGCUAACUGUGUAAGUAACUAAUACU  
>N3081  
GAUAUGCUUGCAGAUGGGAGACUGGAUGGAUGACCUCUGAG  
>N3082  
AUAACUUGAAGGCUCUAAGACUGUGGACUUGGCUUGACUA  
>N3083  
CUCUUGCGCCACCGAUGAGGACUGCACCGGGGUGACUGCCA  
>N3084  
UCUUGCCCCAGGGCAUUUGGACUUCGGUUACUCUCAUGAA  
>N3085  
AAGCGAAAGAACACUGAUAGACUAAAGAAAACCUAAAUAUG  
>N3086  
GCCGGGAUGUGACAUAUUGAACUGUGGCCUAAAAUCAUUU  
>N3087  
AGAGCACUGAUGUGCCAGGAACUGUACUUGGUCGUUUUACA  
>N3088  
UACAACAAACAUUUCAUUGAACUGGAAGCUCAGACUUCCCC  
>N3089  
AUAUGCUGCUCUUGUCCAGGACUGACGUUCUGUUCUAGCAC  
>N3090  
AUGUUGGGGGAGAACUGAGAACUCUUGAGUCAGGAGUUGGC  
>N3091  
GAGUCUGGCAAGUUAAUGGACUUACCUCAAACAAAUAUCU  
>N3092  
UCAUCUGCAGUAACUCAUAAACUGGGUAAGGUGGCUACUCC  
>N3093  
GUGGCGAUGAUGAAACCAAGACUAAUAGAAAUGUAGUUUG  
>N3094  
GUAUUGAGCAGCCAAUCCAAACUCUUCAGUUCGCGCUUGG  
>N3095  
UGAGGAAUGCUUCUCAGGGAACUUUUUAUUUAUGUAUAUGGU  
>N3096  
CCCUUCUACAGUGUGUUGAACUCUCAGAAAGCCUAGGAGA  
>N3097  
UCUGCCAGAUUGCUCUUAACUUGGUCCAGUUUCAUUCAG  
>N3098  
CCACCUGCUCUGCAUAUGGAACUCCUUCUCAGAAACCCUAG  
>N3099  
UAAUUUAUGUGUCUGUAUGAACUGAUUUUAGCAUAAAUGUA  
>N3100  
UGAUUUUUAAGGGACCGGAAACUCCACAGCCUCCUAAAA  
>N3101  
AAUGCAUUUCCCAGUGCAAACUGUAUGAACUAAAAACAC

>N3102  
ACCUUGAGACUGUUUGUGAAACUACGCUACAGAGGCAAUUU  
>N3103  
GGUCAGGUUCUUACAGUAGAACUCAGUUCUACAAGGUUUG  
>N3104  
UUGCUGGUGUUGGGCUGUGGACUCUGGCUGUCGUGCAGUCU  
>N3105  
ACUUCUGGAAAUCCCAUGAAACUUAACUUCUAGGACUGUC  
>N3106  
AUAAGACACCACUUUAAAAACUAGUAAAGUGUUGGCUCUA  
>N3107  
GGAUUAAGAGUCCUGAGAGACUAGGAUAAGGAAGGGUGGG  
>N3108  
GUACCCAGAUGCUGCUGUGAACUUUGAGAAGUUGGGAACAG  
>N3109  
UCCACACCAUCAGUACUUAACUUCCUAUCCUGUUUGUCUC  
>N3110  
AUUUAAGUCUUUAAUGGGAACUGGUUUC AAGGAAGCUAUA  
>N3111  
UGUCCUAAAUCCUUUAAAGACUACUAUAACGUGGAAGUCU  
>N3112  
CACUGAAGUUUAUCUCUUAACUGGCUAACUAUACACACUA  
>N3113  
AUCCUUAAGUCACUGGAAGACUAUCACUGCAUCAAAGU  
>N3114  
CUAUGUAUCUAAAUAACCAAACUUGCAAAGAAUCCAUUUCU  
>N3115  
CCUGAAGCUCAGACAAAAGAACUGAAGGCUCCAGGCCAGCC  
>N3116  
GACUGGCAGCAAUGGUGAGAACUGGAUCUAAGCAGCAGAAC  
>N3117  
UCAUGUAAUUUGAAACCAGGACUGUAACAAAUAAAACCCAG  
>N3118  
GACAGCUAACUACUACCUGGACUAAGCGGACACUGAUGUUA  
>N3119  
UGUCAUGUAGACAGGGCUGGACUGGGUUCUGAUCCCGCCU  
>N3120  
GAUGUAGUUAUCCAAGAUGAACUGCGUAACCUGAGUGGUUU  
>N3121  
GGAGAGGAAGAAACAAGCAGACUUCUGGGAGUUCAAGGCUA  
>N3122  
CAUAAUUGGAAUGUAGUAAAACUGAGCCACACAGAAUCCCA  
>N3123  
AGCUGGUUAUCUCUCAUCUGAACUGCUGUGCAGUCAUGGAUA  
>N3124  
GCUCCAGACACCAAGAAUGGACUGGCAGGGGAUGAACCUUC  
>N3125  
UUUCUGUGUCUCAUAUCAGGACUUGAGAAAGGGAGCUUGGA

>N3126  
UCGACCUUAGAGCAAAGAAAACUUCCAGUGACAGGAAAGAU  
>N3127  
GCUGCUCUUUCUGGAACAAGACUUUAAUUCUGUUAGCAUUC  
>N3128  
AGUUAUGUGAGCAGUUAAAAACUCAUUUCAAGUCAUAUAUU  
>N3129  
UUCGAGAAACCAUUAGGCAGACUAAGAGUUAAAAAAGGAGA  
>N3130  
UCCCUAAUUGAUUAUGGGAAAACUCAGUCAGAAGGUGUGUGA  
>N3131  
ACUAUCUAGAAAGUCAUCAGACUCACUUGGCUAUCAAGUAU  
>N3132  
AUCUCUGGCGGUUCUUCUGGACUAUCGAGCUUUAGUCCCA  
>N3133  
AUAUAGAAUAGAAAACAGGACUCUGAAUGCUCAGAAGGAA  
>N3134  
UAAAAUAAAAGAACUGGAAACUCUGUUGGAGUUAACUAUU  
>N3135  
UCAAAAUUGAUCACCUUUGAACUGCAAUCCUAUAGGUGGAA  
>N3136  
UGGUGGGACCUCUACCAGAAACUCCAAACUUGUCACUUGUU  
>N3137  
GAGGCAGCCUACCUGGCCAGACUGUCUUCAGCAGCUCUUUC  
>N3138  
CACACAACAUAUAUGCAAAGGACUACUAUCUCAUACCAUAUG  
>N3139  
GAUAGUAGCUUUUAUUUCUGAACUUACUCUUACACAAAACAG  
>N3140  
UUGGACAUUCAGCUUUGUGGACUGAGCAGUUACUGGGCUCU  
>N3141  
GGCAUAUCACCAACUCCAAAACUAAGAAUAUCAUCAGAGAG  
>N3142  
GGUACCUCUCAUUGGCUUGGACUAAGAACUUGGGGGAAACU  
>N3143  
GCAGCUGAGCAGUUAGACAAACUGCAAAAAGCACUUCUUGAA  
>N3144  
AAUUUUGCCCGUGUCAAAAAGACUGGCACUCUGGACAUGUCUG  
>N3145  
UUUCCAUGGUAGUUUUUGAAACUAUAGUAAGUGAGAUUAUU  
>N3146  
CUUUUACUUUAGAGGGAAAGACUGACUAUUCUAAGGCUGUA  
>N3147  
GAGGGAGAUGAGGGAGAAGGACUUGAAGGACAAGAAGGGGA  
>N3148  
CUUGUUGACUUUCUUAAGAACUAGCUCUGGUUUUGUUGA  
>N3149  
AUAUCUAUCACAUACAGGAAACUGCAUACAAUGUAGUCUUA

>N3150  
ACGCUUUCAUCAUGGAGGGAACUCUUAUUGCUUUUUCUUUCU  
>N3151  
UAAUGAACUAAAUCUCUGAAACUAUAAGCAAGCUUCAGGUA  
>N3152  
CUUGCUIUUAACGUGAUUGAACUUCAAGUUUCAUGAGCAUA  
>N3153  
ACUGAGCUAUGCUGAACCAGACUUGCUCUUGCCUCACAUG  
>N3154  
CAAGGUGGGAAUUAUUGAAACUUAAGGAAUUAUAAGACC  
>N3155  
CCCUGUUAUGAUGAUAAUGGACUGAAACUCUGAACUUGUAA  
>N3156  
UUAUUGUAGCUAUUCCAGAACUUCUGGAAUAAUUAUAC  
>N3157  
GUGAGGGAUUAAAAGGGCAGACUCCUUUCCCCGCCUGAUAA  
>N3158  
UUUAUAGAUGAUUGUUAGGGACUAUGCUGGUUAAUAAAUU  
>N3159  
UUCAUAGACAACUGGGCAGGACUCUUUGUUAUCCCCUCCU  
>N3160  
CCCUGGGAAAAACACAGAACUAGACUACUUUUGUCCUUU  
>N3161  
CUUAUUAAUAGUCUAGUAGACUUAAGCAGUGAAUCCACAU  
>N3162  
UUUCUUAUAGCUCUAGAAAGACUUUUAUGGGUUUGUGUGG  
>N3163  
AGACAAACAGAUCUUAGAAGACUGUUAGCCAGUCUAGUAAA  
>N3164  
UUACUUGGUUAUAUACUCAGAACUAAGUAAAUUUCUUUUUAU  
>N3165  
UGUGUAUGGUGCACAGACAAACUGCAUCCAGAACACAUAAA  
>N3166  
UUUAAGGGCAAGCACUUUGAACUGAAUUAUUUAAGGAAA  
>N3167  
AUAUGUAUUUUUAUUUCAGACUUUAUUUCUUGAGAUUGCU  
>N3168  
CUAAUGUCAUAUCAAAGGACUGCCUAAUACACUUCAGA  
>N3169  
CAUGCUIUUAUGGUGAGGAACUGUUAAGAAAGCAGGAAC  
>N3170  
ACGGAACUAGAUGUUAGAGGACUUUGUUGGUGAUGCACCC  
>N3171  
UAUUCCAAGUGUUAACAGAACUUAACUCUGUGUUUAUAGAU  
>N3172  
GAUGUAAACAUGAGGUCUGAACUCUACAACGCUACAUUUUG  
>N3173  
AUGAAUUCCAUCAUCCUGGACUCUCCCUUGGCAACAUAG



>N3174  
GAAAGUUUAUAAAACACAAGACUACUGAAUUUACACAAGUA  
>N3175  
GGUUCUAAAAGAUUUUCAACUGAGCUGCUAUUUUCCUA  
>N3176  
CCACACCACUCCAGUGAAGACUUCGUGGCAACCCCAAAG  
>N3177  
UUAGUUUUCUUUCUUCAGAAACUCUACUACUGAUGUUGUGG  
>N3178  
AAUAUCCACAUGUAGAAAAGACUGCAAUGUUCUUACUCAU  
>N3179  
UAAUCUAAUUUAAAAUAUGAACUAGAGCCAUGAGUAUUCAU  
>N3180  
UCACUUUUUGUGUGUUUGAAACUUGUUCUUUUUAUUGGUU  
>N3181  
UAUAAACCCAAUAGGAUUAGACUCUCCAAAGGCCACCUG  
>N3182  
GGACACAGUUUAUAGCUAGGAACUAUACCAUUCAUUCAU  
>N3183  
CCACCUCAGCCACCACUAAGACUGAUACUGAAAUAAAUCAU  
>N3184  
CAUUCUUAUAUAUAUAAAAACUGGGGGAAUCACCACCCCU  
>N3185  
CCUGAAGCAGACAUUUUGGAACUCAUUUUUUUCUUCCUC  
>N3186  
UUAUUGGUGGGCCUUGUGAACUUUCCCAUUCACCUUUGA  
>N3187  
AAAAUAACUCAAAUAUAAAACUCUAUUUUGUUAUUGAUUU  
>N3188  
GAAGCAGAAAAUGAGCCAAACUCCAGGUCAGCCGUCUAAA  
>N3189  
AUGGUUCUAUUCUCUCUAAGACUAUUAGGAUACAGGGACAC  
>N3190  
UCUAAUACUUAGUUCAUUAAGACUAAGCCAGCCUUCAUUA  
>N3191  
UACUUUUGAGAAUUUUGUAGACUGCAGUUUGAGCAUAGUCA  
>N3192  
ACAUUUUUGAGAAAAGGGGACUAGGCUUCUCAAGGGGAAA  
>N3193  
UUGUUAUGGAGAAGUUUGAAACUAAAGACUAAAGGGGUUGG  
>N3194  
CAGUCCUUUACUGUUUGGGACUGUUUUAGAUGUCCUGGGG  
>N3195  
AUAAAACCUCUACAAUGAAAACUUUAAAUGUAUGAAGAAAG  
>N3196  
AGACUAACCUUUGGUUGGAACUUCUUGGAACCACGCAUUU  
>N3197  
UAAACCUUGGAUUAUGAGAAACUUCAUAGGACAGAUGGCUA

>N3198  
GGGAUGGAAAUGGAGAUGAGACUGAGAGAAAGGAGAUC CAG  
>N3199  
ACAUUUCUAGUAAGUCAUGGACUUCUUAACUAGAUUCUUG  
>N3200  
GACCAUUAAGAUGACCAGGACUGCUGUAAGAAUUUUUGCU  
>N3201  
UUAUUUAAUUUGGGCAUGGGACUGUUUCUUUGACUGAGUGU  
>N3202  
AGGUGAGAAGGGAGCCUCAGACUUGGAGGUCAGGUUAUAAC  
>N3203  
GAAAAGCUAACAUAAGAAAACUCAACCAAGCUGAAGUCA  
>N3204  
AAUUUCCAAGCUGCAUCUGAACUGGCUUCCAAUCCAUCUAU  
>N3205  
UCAGCUCCACUGGAGACCAGACUGUCUGUUUAUAGACCAUU  
>N3206  
CUAAAGAUGUACAGAGAUAAACUGACAGUGUUACCAAUUG  
>N3207  
UGAGUUAAAAACCAACCUGAACUACAUAUGAUAUUGUCUC  
>N3208  
UUAUGUGUAUGGUGAGAUGGACUAUAACGUUCAGCCCUUGA  
>N3209  
CUAGCCAGAGUUGAGAAAGACUAGAAAGAGUGAGGUUAUU  
>N3210  
UUACCAUCAAGGAUCUGAAAACUGUGAGACUCCACUCUUC  
>N3211  
AUUUCGAAGUCCUGGGGAAAACUGUCUGUUUGGGCCCCGA  
>N3212  
GUGUGGCAUGGUUCUCCAGAACUGUAGGUUAUAGAGUUUUA  
>N3213  
UUAGAUGAUACAUAAGAAAAACUAAGUUUAUUCUAAAGAAA  
>N3214  
AUGUUUUGCCAGAAGACAGGACUACUGGCAAUGAAGAUUGG  
>N3215  
UAUAAAUGAAAUAUCUCUAAACUUAUUUACCAUAAAGACU  
>N3216  
UAGAAGUAAGCAAAAAUAAGACUCUAGAUUGUUAAUCCAA  
>N3217  
AGGAAAGUGGAGGUAGGGAAACUGGGAAGACCAAAGGUAGG  
>N3218  
AUACUAUUUAUAGAACAAAACUUCCAAUCAUCAUAUGUGG  
>N3219  
AAGCAUAUGGCCAAUAUUAAACUAAAGGAAGAGAAAGAAU  
>N3220  
UGGAAGACUAGUAUUUGGAGACUGGACCAAAGUCUUAGGAU  
>N3221  
UGCAAACCACUGGAUGAAGAACUGUCUCACCCACCACCAAU

>N3222  
CAAAGUAAAAAAAAAGUAUAGACUGAGACAUUGACACUCGGA  
>N3223  
UAUAGUUUACAGUUUUGUAGACUGAAAGUUCAAGAUCAAGG  
>N3224  
ACAGGCAAAGGACCUGAGAGACUGCAGUGAGCCUCUACUG  
>N3225  
GAACCAUCCUGGGGAUGAAGACUACUUGACCAUUCUGGAUA  
>N3226  
AGAAAAAUAGAGAUUCAAAACUCAAAAGAACAUAUCUUGGC  
>N3227  
GCCUGCAGAAUCCUUGAAACUCCCAGGGCAAAAUGACGG  
>N3228  
GCAAGUAAGAGGUCAUGAAAACUUGGAAAGUGGUAGAAAAU  
>N3229  
GGUGACUUUGCUUUUGAAGAACUUUUAAGGAAGGAACUCCU  
>N3230  
GGAUGUGGGGAGGGGCAAGACUGGGAGAUUGGGGAAACAG  
>N3231  
ACCUCCUGGCACAGUCUGGACUGUUGUACUGGCUGAAAAC  
>N3232  
CAGGGCACUUAGUGCUAUGAACUUUCUUCUAGCACUGCUU  
>N3233  
UAUGUUCUJCCCUJGGGAAGACUAAUUCUUCUGCUCCACA  
>N3234  
AGGUACUUUCUAAAUUUGAACUGACAGUAUCAGCUCACCU  
>N3235  
CCUJGGUGUUUGCCUAAAAGACUUGACAAUUGUGUCCGCUA  
>N3236  
GAAUGUAAUCAUAUAACAGACUAGAAGACAACAAUCCAGA  
>N3237  
ACAAAACAAAACAAAACAAAACUAGAGCCCUAACACCAAU  
>N3238  
AUAGCAUACAAAUGGUGAAAACUAGGCAUUUGUUCUUUUUG  
>N3239  
ACAGUCAAAUAUUAGGAGGAACUCAAGUAGUCUUCUGAAAG  
>N3240  
CAUUUUAGUAUCUCACAGAGACUUGAAUAAGCUAGCUUGUC  
>N3241  
GGGAGGAAGACCUGAGAAAAACUUGCUAAGUUCCAAUCUGA  
>N3242  
UUAAGGAGGAAAUJGCUAGAACUCAUCUGUGUAGUUCUUU  
>N3243  
CAUGGCAUAACAAUAUAUGAACUCUCCAGGAACUGGUUAUA  
>N3244  
ACAGCAUGAGAAGCAGUAGAACUUUAAGUGUUUUUCAUGC  
>N3245  
AGCUGGACUCCAGGAGGAAAACUUAGCAGAAAUAAGAAGU

>N3246  
UCAACAACACAAUCUCUAAACUACCUGAACCCACCUUU  
>N3247  
UCCUGGCAGAAGAAACCAGAACUAAGAAAGACCUCACUGAC  
>N3248  
UAGAAUGUCAAUCUUAAGAACUUUUGGCUUAACUUGAAU  
>N3249  
UGCAAUAAGUAUUCAUUUAAACUGAGUUCUCAGCUUAGAGU  
>N3250  
AUAUACCUGUCCCAUUUAAGACUGAAUACUCAGUCUCUGAG  
>N3251  
GAGAAGAGAGUUUAACUAAAACUAAGCAUCUAUGGAAAAGC  
>N3252  
CUACCAGCUGCUGGGUAGGAACUCUCAGAAGACAGUUAUGC  
>N3253  
AGCAAGUUUGGCUGAAAGAGACUUCAAAAUAAGAUUGAUA  
>N3254  
CAUGAGAAAUCAGGACAGGAACUUAAGCAAGGCAAGGAGGG  
>N3255  
UCUGGGCAUGUCUGAGAGGGACUGCAUAGGCUGAAUUAAGU  
>N3256  
UCAGCAGCCAGCCAGAAUAGACUGGAGCUAAGGCAACAAAA  
>N3257  
GAGCCUCUCUUGGAGACAGGACUCGGAAGACCAGAAUUGGA  
>N3258  
CUCGGAAGACCAGAAUUGGAACUAUGUGGAAUGUGGACGUG  
>N3259  
GGGGCAUUCUAGUACAUGAACUGUUGCCUGUAAGUAGUAU  
>N3260  
GAAAAAAGAAAAAAGAAAACUCAUACUUUUUGGCUUCCC  
>N3261  
UUACUCCCUGAUGAGAACAAACUUCUUCUAAUAUCUGUAA  
>N3262  
CUUCUGCAAGUCCCAAAGGGACUUCUUCUGCCACUUUGUG  
>N3263  
UCUUUCUCCAAUUGUCCAGGACUCACGAUUCUUGGCCAAA  
>N3264  
CCACACUCUCCCUGUGCAGACUUGUCUCAGCAGGAUCCAG  
>N3265  
GUCUGGUCCCCGAAACAGGGACUGUCCCAGAAGCUCUGUAG  
>N3266  
CUCGUGGAGGUCAGAAUAGACUUAUAAGAGUCAUGAACUU  
>N3267  
AAUUGACUUUUAUAUGUUGGACUUAUGUAUUUCAACUUUU  
>N3268  
GAGUUUAAAAAAAAAAAAAACUAUUUUUAACUUUUACUGA  
>N3269  
AAGCAUACACUCAUGUAAGAACUUGAUCGUAAAUUUUCAUA

>N3270  
ACUGGUUACACUCCAGAGGACUGGGUUUGACUCCCAGUAC  
>N3271  
UUUUUUUUUAUAGUUUUUGAAACUUUUACAUUUUUUUACUUUG  
>N3272  
GAGGCACUGUUGGGAAUAGGACUCACUGUUGUGAAUUCACU  
>N3273  
UGAACUUUAGUGAGAUUAAGACUUGUAUUAAGCCGGACCU  
>N3274  
UAUUGAGCCCAAACUGCGGACUUGUUGUUUAAGGUGUUCU  
>N3275  
AGAAGAGGGACAGAGGCUGAACUUAAGACUACAUCAUAAUU  
>N3276  
UGCAACAACCAAAAAGAAAAACUCUUCAUAUAUCCUCAAAU  
>N3277  
GUUUCUCUGAUCCCUUGUAGACUUCUGACAUCUAGGUCUGU  
>N3278  
CGACAGUUUAUACACUGAAAACUUUCCAGAGAACCCUGAGC  
>N3279  
AAACACAUACUCAACAACAAACUCACAUA AAAACCCAGAGA  
>N3280  
GCAA AUGGAAUUCUUACAGAACUCUCAAAUUGCCAAAGACU  
>N3281  
ACCAGGCUCACUCUCCUGAAACUCAUUCAAAACAAAUCUG  
>N3282  
CAUACAUUCAGGACCAGAAAACUGUCAUCUAGGAAAUGUUC  
>N3283  
UACAACUAAAUAGCAGCAGAACUUUCAAAUUCAGAGCAAGU  
>N3284  
GAAGACACAUUAAAGAGAGAACUUAGGAUGAAGGACUCAUG  
>N3285  
UCAUGAUGCUAUCAGAAUAGACUAUUUUUAUAAAUACAAGAA  
>N3286  
AUGUCCUUAAGAACCCAAAACUGAAGACAUAGUAGCAGUG  
>N3287  
UCAAGUGAAUUGACUUCAGACUCUGAAAGUGCUGAAGUCA  
>N3288  
CGGGGGAUAAACAAGAUAGACUUCUUUGUUAUUGUGUUCU  
>N3289  
UCCGGGAAGUUUUUAUUCAGACUUUGGAUGACCUUACUUGG  
>N3290  
UAUGAUGUUUGCAUUUGAAGACUGCGGUUAUGGAGAUAAUU  
>N3291  
GUGAUUUAGCUAGGAAGAGGACUGGACUAUAAUGUGUAACA  
>N3292  
CUUGAAGUUCAUUGUCCAAACUAAGGUAUCCAAGCUCUCA  
>N3293  
GCUGGGUAGAAUGGUUGAGGACUGAGUAGGAUUAUCUGGUC

>N3294  
UCCUGCAAGCUGACCUUUGAACUCCACUCAUGUAUCACAGU  
>N3295  
GCUGUGAUUAUGAGCUUCAAACUCCACAGAAAGAUUUUAUUAU  
>N3296  
ACAAUAAAAAGGACAAGAAGACUUCUAUGGUUUCAGUGUG  
>N3297  
CCAAAGCCACGGAAACAGGAACUCUUCUCCUCAGAGAAACUG  
>N3298  
UGAACACUCUUAGAGCUUAAACUAGAGUAUCUGAAACGGUU  
>N3299  
UCCAUCUUUAUUUGAUGGACUUUUAAAGGACUCCAUGAAC  
>N3300  
GACAAAUGGUUUUAUGUCAAAACUAACCUGAGGGAAAUCAUU  
>N3301  
AUAUGAGCAGCAACAAAUGGACUUAGUAUAUAAUAGUUUUA  
>N3302  
AUAUGACCCAUCCAAAGAAAACUGUCCAUGAAAUAUGCAUC  
>N3303  
GAUAAAAGAACAGCAUGGGAACUGGAGGGAAGGGCAUUUCU  
>N3304  
ACUCUGAAUAAAAUACUUAACUUUCAAGCUUUUAUUUUUC  
>N3305  
AAAUCUUUUAUUUCAGAGAAACUUUCUUAACACUCCCACU  
>N3306  
AUGCAAUGUGGCUUUAAUAGACUUC CAGAUGAUUACAGAGA  
>N3307  
GGCAAAGAACAGAGACCAGACUGAAGUGUCUUGGCAAAGC  
>N3308  
AGUCAUGGGGGCUGGGUGAGACUGCUGUUGUCACCACUAGG  
>N3309  
ACAAUUUUCUUUCAUAGAGGACUUCAUAAGAGAUUUUUUUU  
>N3310  
AGCUGGAUACUGGAUACAAAACUGCCCUUACCUCACCUACC  
>N3311  
AGGUCUUUAUAAAUCCAGGAACUGUCUCAGUCCUUGGGCUG  
>N3312  
UAAAAAAUAAAUCCUUUAAAACUUUAAAUAUCUUCUUGGGA  
>N3313  
UGAGGGUGAGUUUGAUUGAAACUCA AUGUGUACAUAUAUAA  
>N3314  
AUGUGAAUCUCAGCAGUGGAACUACACUCAGGUCCCUUCAU  
>N3315  
AAAGGCAGAUAAAUACUGGGACUCUAAACUGUUUCCCAUUA  
>N3316  
GGCUAUCUGAACAUUGGAAACUACAGUCACUCUACUGAAA  
>N3317  
UUACACAUGGUAACAUUUGGACUUCUUUCUUUUUUUUUUC

>N3318  
AUGCCUUUACUUCCCACGGGACUGAAACUAGCAAAGUGUUG  
>N3319  
UGCCUCUCAGGUACUCUGAAACUCCCAGGAUCACAGGAUCG  
>N3320  
ACCUCCAACACCUAGAGAAAACUUGACUCCCAGGAACUCUG  
>N3321  
CAGGUCAGUAGGGACCUCAGACUGCACUUCACAUAGCCCGA  
>N3322  
AGAACUCCAAUUCCCUGGAAACUGACAUUGACGGGGGUCCA  
>N3323  
AUUUUUUUAUGUCUUACAAACUCCAUUUUUUUCUUCAGUG  
>N3324  
CAACCAGGAGAAGAAUGGGAAACUAUGAGGUGUGGUGAUGUU  
>N3325  
AUUUGACAGUCAUAUAUAGACUCAGAGCAGUGAGAGAGCC  
>N3326  
AAUGUCCAUUGAACCAGGAACUCAGACAUCCCCUGGCCA  
>N3327  
AGAGAAGUAAAUCAGGACAAACUAGCAUGACAUAUAUGUAU  
>N3328  
CCUGUUCUCAUGUGCUUGAGACUCUUCCCUAUGUUCUUUUC  
>N3329  
ACAAGGUCUGACCUUCCAGACUUGCUGCCACCUGCGAGGU  
>N3330  
UUUUCUUGUUGACCUAUAAAACUUUGUCUGGCAGAAAUACC  
>N3331  
AGAAUGCCCAUGUUCCCAGAACUUCCCUAUGAGACCACUGG  
>N3332  
GAAUCUACCUAUUCUAAAACUAAACAUUCUACAGGUUC  
>N3333  
UGUAUAAGAUAGAAUAGGGAACUCUGUGUAGAAUUUCAA  
>N3334  
CUCUGUGUAGAAUUUCAAAAACUAAGAAUACUACUCUCUU  
>N3335  
UAAGGUACUCUGCUUUGAGAACUAGGUACUUAACAUGCAGU  
>N3336  
AGAUAUCCAGUUCAGCAGGACUAAGUAUAUCCUCUCCCAC  
>N3337  
ACACAGCAUUGCAAGUAAGGACUCCUAAAUGGACUACAUUU  
>N3338  
GGCACAUCUAUCUCCUCUAAAACUAAAAUAUCCCAACAAUCU  
>N3339  
GGACAUCUCUGCAGUCCCAAACUUUGGGUUAAAACCCCUGG  
>N3340  
AUGAUGUCCUACGUCACAGACUAACCAUUGAAAUGUUCC  
>N3341  
CUAAAUCACUGUUCUAAAACUGUAAUAUAUAUGAAUAU

>N3342  
AUUAGACUUACAGAAAUUAGACUUAUUUUUCAAAGAUAAU  
>N3343  
ACUUUAAUAGACAAGAGAGGACUCAUGAUUUUUUGUAGU  
>N3344  
AGACUUUUUUUAUUCAGAACUCAAUAAAUGGCACCAAG  
>N3345  
UCAUUUUCAAACCCAAAGGAACUGACAGUGUAAGAGAGUAU  
>N3346  
UAAGAUACUGAAUUCUUCAAACUGUGAUUUUAACACACA  
>N3347  
UGUAUACACAGGGCAUGGAAACUCUGCUCCCUUUUCUCAU  
>N3348  
CUUUAUCCUUAAAAGGAAAAACUAAUGAAUAAAAGAAUGAG  
>N3349  
AUAAGGAAUUACAAAUUCAGACUCCAGGCUAGGAGACAGUC  
>N3350  
AAAACUAAGAAUAUCUAGACUAUAACGAAAUAAUCCAG  
>N3351  
CCAUGCCUCACCCUACAAAAACUGAGAUUACAGAUGUGACC  
>N3352  
CCCUAUGCAGGGGAUCCUGAACUUUAUAAGAAUGGAAACUG  
>N3353  
GGUAUCUGACCGCCUGAGGACUUUGCCACAGCAUCUGGGC  
>N3354  
AUUCAGAAUGUGAGGAAUGAACUGUCAGUUAGGAAGCACAG  
>N3355  
UCUAACAUACAGUAGUGUAGACUAAGCAUCCCAUUUCAAG  
>N3356  
GGUUUCUGCAGGAAACCUGAACUCAGGUUGCUGAGUACUAG  
>N3357  
GAACAACAAACGGCUUCAGAACUCAUGGUCUCUGUCCCACC  
>N3358  
GAUAAGCACCCUAGGAAAGAACUUAGAAGUGUAGGUUGCCA  
>N3359  
AAGUUACAUAUAUGCCAUGGACUUGUUUUUCAGCUGUAGUG  
>N3360  
UUCUUCACAGAUCUCCAGAAACUUUCCCCAAGAUGUUAAG  
>N3361  
ACGGAGGAAUGUGGUGAGGAACUGUGGAAGGGGGACUCGG  
>N3362  
CCUUAUAUAUUUCUCAGUAAACUAACACUUAUUAUAGUGA  
>N3363  
AUGACAAUACCUCCUUUAGGACUGUGUGUUCGAGAGUCUUU  
>N3364  
UUCAAUAGCUGCCUAUAUGGACUCUUCCCUCCCUCCCUU  
>N3365  
UGCCAUCUUUCUAUUUUAAACUGUUAUUAAAUAACUUAU



>N3366  
AGAAGGGACUGUACCCUUGAACUAUAAACCAAAUAAAUCU  
>N3367  
GAUCUGAAGGCAGCCAGAAGACUGUCCCCUGCAGGCAGCCA  
>N3368  
GUGCCUCACUGUGGAGGCAGACUUUAAGUUCUCAUAUGCUU  
>N3369  
CACAUUGGUUUAUCAGUGAACUACUGUGAAUGUAACCAGA  
>N3370  
AUCCCUAGGUUCAGUGAGAGACUCUGUGUCAAAACAAUAUG  
>N3371  
UCCCGGAUGUUUAUGGUAGAACUCAUAUAUAUCAAGGAUAA  
>N3372  
GUGUUUGUCUUUACCGUUAACUCUUCAGCCACCUCAUUG  
>N3373  
AACCAAUCACUCCACAAGGAACUGCGUUUUUUGCCAGUUUG  
>N3374  
GUAAAGACAGACUAUUAAGAACUUUGUAUUCUGAUUUCUUC  
>N3375  
CACAUUCUAUCAUAAGAAAAACUUGUGUUUGAAAUGACAGC  
>N3376  
UUUUUUAGAAUUACAAUAAAACUCAAAAUUUAAUGGCCUUC  
>N3377  
GAAAUCCAACAGUAGAAGAACUUCUUGAAGAAUGUUAUAU  
>N3378  
CUGCAUCAUUCGCCUUCAGACUGGUAGUUCAGAGCCACUG  
>N3379  
UGC UCCAUCUUUGUCCUAAACUUAAGAGUGAAGCUGCUAG  
>N3380  
GGAGAGAGAUUGAGCCAGAGACUGCUGAUGUUUCACUAAAU  
>N3381  
UGGUAACUGCUGGCAGAAAGACUAUCAUUGGCUUCUCCAC  
>N3382  
GGGGGAGAGGAAGAGGGGAAACUGUGGUCAAGACAUA AAAA  
>N3383  
UGCCAGCACCUCUCUGAUGGACUCUGGAUGGAUACUUCUAA  
>N3384  
UCUAAUUAUUUCCCUUUUAAACUUUCUUUUUUCGUCAACAA  
>N3385  
GCAGUUGC UUACGCUUGAGAACUAAGGGGGAAAAAUAGUGU  
>N3386  
UUGGUACAUCUUUUGGUGGAACUGUUUGGGAAAGACUAGGA  
>N3387  
UUGCAUCCUCAUACCUCAGAACUGGUAAGAUAAAUCCUCA  
>N3388  
CCAGAAUGAAGCAUAUGUAAACUCAGUUGAAAACCUUUUGU  
>N3389  
CCACACCUGAGCUUAGAAAAACUAUACUUACCUUCCACGCA

>N3390  
AGAAUGAGGGCAGCCUUGGGACUGUAGCUCAAUGGUAGAGC  
>N3391  
UUAGCUUGUCUACUAUUUAGACUUAACACACAUAUCCAUUU  
>N3392  
AAUCCUAGUGAUUAUAACAAACUUGUGUCUAAAAAGAUAA  
>N3393  
UUCAUACUAUGUGCGUGGAGACUUAAAUGAGAAAUAAGU  
>N3394  
AGGCUAGCUAGUCACUGCAAACUUAACAAGUAACAACAGAC  
>N3395  
UUUCUACAGUGAACUACCGAACUCUUAGGACGAGACAAGGG  
>N3396  
AACAAUAGCCUGUGUGUCGAAACUAUAUAAUUAUGAGUAUG  
>N3397  
GAGAAGGAAAACAGACCUGGACUAGCCAAUACUCUCAUUU  
>N3398  
AGCUUUCUACAUUUCUACAGACUUUACAUAUUAUCAUCUUA  
>N3399  
CAUAUUUUGAGAGUUUAAGGACUCAAAACUAUCUCUAGAUUG  
>N3400  
GUAUUUGGAAAAAAAAGGAAACUUCAGGAAUUAUAAUGGAG  
>N3401  
AGUGAAAAGGAUCUUCGGAAACUCUGGGAAUUGAAACUUUU  
>N3402  
CCUGCCUAACAGAUCAUAGGACUUGUCAGCCUGUUAUCAUG  
>N3403  
UCCCCAACGUGGAACUCCAGACUUUGCAUCCUCAUGCUCAA  
>N3404  
UGCUGCACCCUGACUCUAAAACUAUAAUUUACUCAAAGCC  
>N3405  
UGAGGUGAUUCACUUACUAAACUGUAGCAUUGGGCUCCAUG  
>N3406  
AGAGCCUAGAAAAGGCAUAAACUGCCAUCCUUUCUGUGAAG  
>N3407  
AAGCAUCUCUGUGUUAUUAACUGUCCAGAGCAAUGACUAU  
>N3408  
GAUUCGGCUGUGGUUGCUGAACUUGGAUGCCUGAUUGUCUU  
>N3409  
UGUUUUGUUUUGUGUUCAAGACUGGGUUUCUCUGUGUAGUU  
>N3410  
ACAGAUUGGCGGAAUCUGGAACUAUUAGACAAAAGGCCCGC  
>N3411  
GGCUCUAAAUUGC UUUGAGAACUCUUUCUAAAACUAGACUC  
>N3412  
UAGACUUCAGGAGAAUUCAGACUCUAUCAUUGUUACAUAUCU  
>N3413  
UCCCCAACCCAU AUGGGAACUCACAACUCUAUGUAACUC

>N3414  
CCUGCCGACUGGAAGUUGAGACUGUGCUCUCACGUUGCUCG  
>N3415  
UGAUCAGUAUAUACAUGGGAACUAUAGUUAUGAACAUAGGC  
>N3416  
AAGAUUCACUCUAACUGUGGACUUUGGAGCUC CAGAAUGAA  
>N3417  
AGAAGAGGAGAUGCUAUUAGACUGAUUUUGUUACACUGCCA  
>N3418  
CUAACCAUAAAAUCAGCAAAACUGAUGAAAAUCUUUUUU  
>N3419  
ACUAGCAACCGGAAUAAAGACUGGUGAGAAGAAACCAUGA  
>N3420  
GAGGCUUUAGGACUGCCAAAACUCCAGCUUCGGGCUUGACU  
>N3421  
GCAUAUGGGUAGCCCAACAGACUGCUUACAGAAACCUUUUG  
>N3422  
CCCACAGCAAAUACAGUAGACUAAAAACUAACAGGUGAAC  
>N3423  
UAACUUUAAAAACCAUUUAAACUACUAUAUAAGAGAUGGAA  
>N3424  
CCAUGCCUGGCUGACCUGAAACUCAUCAGCAAUCCAGGCUG  
>N3425  
AUGUCUCAA AUGCUGGCUGGACUCUCCACA UCCUCCUA  
>N3426  
GUGCCCUUUGUCGCUCCCAAACUCUACAGUUAGUACUAGAA  
>N3427  
UGUACUUUCAUAUCUACAGGACUAAGUCAUCAUGGGUAUAU  
>N3428  
AGAGCAACACAUCUCUUGGGACUGGGGUCACAGAGGGUUGU  
>N3429  
ACGAUGACACCAUUGCAUAAACUAGCAAGCAUUUGCUGAAA  
>N3430  
UAAAAACCUACAUAUAUUGGACUUUGGAUAAUAGGUAAAAGA  
>N3431  
UUUUCUGAACAAUGGGUAAAACUAAGAUUAAGCUAUGGUU  
>N3432  
CCAGCUGUGCUGGGCUCUGAACUGUCAACAGCUUCAACAGU  
>N3433  
AGCCAGGGCUACAAAAUUAGACUCAGUCUAAAAAAAAAAAA  
>N3434  
ACUGUGGUUCUAUGAACUGAACUCAGAUGGCCAGGCUUGCA  
>N3435  
CAUAGGUAAAACUACUUCAGACUUCUUGUGCUUUAAGGGA  
>N3436  
AGCAGUACAACUCAUUUAAAACUCAAGGUUGAGGGCCUUGG  
>N3437  
ACUCGGGAGGGUGAAGCAGGACUGUGUCUCAAGCUGGAUUAU

>N3438  
GGAGCCAGAGCAACUUAAGACUGAAUGGCCAGAAGACAAA  
>N3439  
CUGAAUGGCCAGAAGACAAAACUGAAGAAAGCCUGAUCUGU  
>N3440  
AAGAGGCAAGCCUGUAAAGAACUAUCUAAUUAAGUUAGUAG  
>N3441  
GUUGCCUAAGCUGGUCUGGAACUCAGGGGCAACCUUGCCUC  
>N3442  
AGUCAGAAAUGGCACCUUGGACUCACAGGUUCAUGUGUCCA  
>N3443  
GAAUUGUUCACAAUCCAAAACUAUUUGAUUACUAACAAAU  
>N3444  
GACUGUACAGUAGAAACAGAACUAAGUGACAUUAAACGGUG  
>N3445  
UUGGUUACAAAUUCUUGUAAACUUUCCUUUCCUCUAGUGG  
>N3446  
AAUAAACUUCAUUAAGAAAAACUUAUAAGCCUCCUCCUCC  
>N3447  
GCUAUGUCUGCCUGUAAGGGACUCUUUGAUUUGCACUUC  
>N3448  
GAUGGUUAUGGAGUGAAUGAACUUAUAAGAACUGAACACUU  
>N3449  
CGCAACUUAUGUACGAUAAACUAUUUAAGUUCUACCUAUG  
>N3450  
GAAUUCUUAUUCUGUAUAGAGACUGAAGGUUUUGGGUAAAA  
>N3451  
CUUGGAAAAUUGUUUCCAGACUCUUACCCUGAGGUAGUGU  
>N3452  
AAGAGGGGACUAUAAUCAAACUUUUAGGGUCUUAGGUGCC  
>N3453  
UCUGGGGCCACGGAGUGGGAACUCAACAGUGGCAGAUAAAG  
>N3454  
UCCGGUUAAGGAGAGGCAAACUGUGGGAAGCCACAAUGUG  
>N3455  
GACACUAAAGACUUGAUAGAACUCAAUGAAGAAGAAUGCCC  
>N3456  
ACACACAAACAUAGCAUAGACUAGCAUCAGUUGUUAAUA  
>N3457  
GGUCAUUCACAUUGUUCUGAACUAAGGGUUCUGAAGUAAA  
>N3458  
AUGGAUUUACAUGUAGUGAGACUCAAUUCUAAACAAGAAGG  
>N3459  
UCAGAAUCUGUUUUAGAAGACUCCUGUUGCUUCAUGAAUG  
>N3460  
UUCUUUCCCAGCAAUGUAGACUGUAAAGGCUACUACAUAG  
>N3461  
UUGACAGCACAGACCAAAGAACUCCAUCAGCAAUUUCCAC

>N3462  
UGACCAUUGAAUUCUGGCAAACUGCUUUUAACUGUACCUGG  
>N3463  
GUUCCUAUCCACACAAUGGGACUUCACUUUGUAGUCUUUCA  
>N3464  
UGUGUGUGUGUGGUUUUAGGACUGAGCAAUCUGUACUGGAU  
>N3465  
AGAUUCCACAGAAAACACAAACUUAUGAUUUUUUUAGUU  
>N3466  
GGUUUUUAAUUUUGUAUCGGACUCCUGAGUAGCAUGGGAGG  
>N3467  
UAGUGGGCAGAUUUGUCCAGACUGCAGAUUAUUGUGAUUUC  
>N3468  
GGAAGCUAGCAAAGAUAAAGACUGUAUAAAACUGAGCAA  
>N3469  
GAAAGCAAUCUACAGAUAAAACUCAAUCCUCAUCGAAAUUC  
>N3470  
GCCCAAUUGUCAUUAGAGAGACUUCAUCCAGGAAGUGAUGG  
>N3471  
UUGCAGACCCCUUAAGGGAAACUCUUUAAGUAGUAAGCAUA  
>N3472  
CCAUAGAAGAAAAAAAAAAAAACUCCUGGAUUCUAUCUUGAU  
>N3473  
GGCAUUCUUUCAUAUAUAAAACUCCCCACACAUCUCUCUCU  
>N3474  
GAAACCUCUCCCUCUAUAAAACUUUAACAAAGUCAGAAAA  
>N3475  
CAGAAACAACUGAAUGAGAAACUGUAAGAACUGGAACAGAA  
>N3476  
CUUCAUAUCCACAAUGGUGAACUCACAGUGGAUCCCAGCAU  
>N3477  
CAUUGCCGUCGGGUUUGCAAACUGGUACAACCACUCUAGAA  
>N3478  
UGUUCAAAAUGAAGUUUAAAACUUAAGAUCUAUGAAAGGUC  
>N3479  
AUGCAUGUCAAAUUGUAAAAGACUUGUUCUCAAUAUCCUCAG  
>N3480  
UAUGUUGAGGUACUUGAUAAAACUUAGACUUGAGCUUUGUAC  
>N3481  
AUGUUCUGGUUGAGCUUCAGACUUUAUUACAACGAAUUUAU  
>N3482  
UUCUGAGAAUUUCUAAAAGAACUUUAUAAAGAAGAUUCUAA  
>N3483  
AAUGGAUAUGAAAAAAUAAAACUGCAGUUUUGUGAUGGCAA  
>N3484  
GUAGCUCAGGCUGGCAUUGAACUCUCUCUAAUUCUUUCUCA  
>N3485  
UUCAGGCUAGGGGAGGGGAGACUACACCGGGGGAAAAAAC

>N3486  
ACUCUUGAUGAUUUCAUGAGACUUUGCAGUGACAUAGAUAC  
>N3487  
GUUUGAUAUCCUUAUGGGAGACUCAGCUCUGUCGUCUCCGC  
>N3488  
CACCAACAAUAGAGAAACAGACUUCUAUGUCUGUUCUGGAG  
>N3489  
UUCCCCUCCUUCUUGAGAAACUCCCGACCUUUUGAAAUGA  
>N3490  
UGUUCACUUUAUCAGAAGGACUGAAGCAACCACGCUUUGA  
>N3491  
CAAAGAAUGAGCCAAUAAGACUAAUUAACAUGGAAUAUGU  
>N3492  
CAGUAUCCAGAACUCCUGAGACUUUGCCAAUUCCAGAAUC  
>N3493  
AAGAAAUAAGACAUUAAAGACUUGCUGAAGACUCAAUGAAA  
>N3494  
CAAAUGCAUUCUCCAUA AAAACUAGAAUAUUGUUCAGUUGU  
>N3495  
CAAAACAAAACAAAACAAAACUCGAACAUAUUGGAUCAA  
>N3496  
AGUGCCUGGGCUCAUAGGAACUCAGAGAGAAUAAACCAAU  
>N3497  
AAAGACUCCACAGUUUGAAACUUCCCUUGAUCAGUCUUCU  
>N3498  
CCCAGUAAUUUUUGUGGGACUGGUUUGUUAUCAUUAUUC  
>N3499  
UUUCUCUGGGUUUAAAAUAAACUAUUAUUUUUGCUAAUGUA  
>N3500  
AUUUUUAAUUAGUCAAGAACUAAGUAGUUCUUCACACAC  
>N3501  
CUGAAUGGCCUUUCUUCAGACUCUGCCAUACACUUUAUCU  
>N3502  
UUUCUCUGAAAGUAUUUGGAACUUAGGUUUAAGAAUCCUG  
>N3503  
GAACACACAAAUGUUAGAAACUAGCAUGGCAUACUCCUAU  
>N3504  
GCGUGGCAGGAUAAGAAUGAACUGUAUUAGGGUCACAAAUC  
>N3505  
ACCAAGGAACUCCACAUA AAAACUAGAGACAGUGAAAUAUA  
>N3506  
CUUACUACAUCCUCAGUGAACUUAUAUACUUUAACCAG  
>N3507  
AAGGGAAAGAAAUGUAUAAAACUGUUCAAGACCUGAAAGUA  
>N3508  
UGUAGGAACUGGAACAGAAGACUUCACCUAAAUCUGUGUU  
>N3509  
GUAAA AUGGUUUCUAGUAGACUCUACUGUACGCAUAGGUC

>N3510  
UUCUUAGGUCUCAGACCAGAAACUGGCCAGGGACAUAUUGCU  
>N3511  
AACAAGUUCUACAAGCUGGAAACUUUGAGUUGAGAAAUUUGG  
>N3512  
CCUUCAUCCCAUUUAGUGAGACUUAAGUCCAAAUAGAUAGC  
>N3513  
GUAGCAGUGAGAGAUGGGAAACUGGGGUAAACUAGCAGAAAG  
>N3514  
UUUGCAGGCCAAAUGGAUUGAACUAGAAAAUACCAUAAAUGA  
>N3515  
AAUCUCAGCCUAGUAGAGAGACUGGAUGGUCAGGCUCUAAA  
>N3516  
AUUUCGUGAAGAAAAUGUAAAACUGCUUGGAGAACAUUAGAA  
>N3517  
UAGGAAGAUAUUCUGUCCAGACUUGUCUUUGCCAGUAAGAA  
>N3518  
GCAUGGUUGCAUAUUACUAGACUAUUAAAGUGUGAGCAAUG  
>N3519  
AGCAGUGAGGU AUGACAUGAACUGCUUUUUUCCCCUGUCAAG  
>N3520  
GUAUAAGGAACCUUUUAAAAACUUCUAAAACCACCAAACAU  
>N3521  
UUAUUUUAAGACCUUCAAAAACUAUGUUUUGUGAGCCAGGC  
>N3522  
AGGCCUUCUCAUAAGCAAGGACUUCCACAAGCUUUGUCACA  
>N3523  
AGGUCAUUCAGUUACCCAAACUCCAGAAGCAACAGGAAUC  
>N3524  
CCCUAAGCUUUUCUGAGCAGACUGCUAUCACAAGUAGACCU  
>N3525  
AUGCCACCAUGUGGCAAGAAACUGCUAUAAGAUGUGUAAAUG  
>N3526  
UAACUGCAACAGAGAAGCAAACUAGGAAUAAGUAAAUGUU  
>N3527  
CCCAAUAUGGAGCACAGAAACUCUAUAGAACCUUCACUGC  
>N3528  
AUUAGAGGCCAAAUAGAUAGAACUAGAAAAAAAUUCGAGUGUU  
>N3529  
CUGAAUGAGAAACUGUAAGAACUGGAACAGAAGACAACGCC  
>N3530  
ACACCAAUCCAGUUUCAAAAACUUCUUUCUACAUUGGUUAC  
>N3531  
AAAGAAUGAUUUCUCUAGGACUCUGGAAAAAUUCCUUA  
>N3532  
CUACUCCAACAGACCUCUAAAACUCCCUAGGGCUUUAGGGUU  
>N3533  
UGUCCCUGACCUCAAGCUGAACUACAAAGCAAUAGUGGUAA

>N3534  
AUAUCCAAUAUGUACAAAGAACUCAUUCCAGAGAACCAAAC  
>N3535  
AAGCAAUAUAAUGGUCAAAGACUUCUACAGUUUGACCCUUC  
>N3536  
UCUAAAUAUCAGUAUGUUAAACUGAAAUUUAGUUCAUUCU  
>N3537  
AGUUAUUUUAGAUUGUAGAAACUCUUCUCCUCUUGUUUGGCA  
>N3538  
AGUGCUGAAAUUUAUACAAACUAAAAUCACUGUAUCAGAU  
>N3539  
UGGUGGUUACAUAUGUAUGGACUGAAAGGCAUUAGCAAUGA  
>N3540  
AGAUAUAGACAGGGAAUAGAACUUGGUGUCUCAAAGGGACC  
>N3541  
AUUGUGAGGCUCUGUCAUGGACUGCUGGAUGGCUUGGUGGG  
>N3542  
AACAAACUCAAGAAAAAAAACUACAUGAUCUAGUUAG  
>N3543  
ACCCUAAAACAGAAUACUGGACUCAAUUCUAGCAUUGCAG  
>N3544  
UGUAUCCUCACCUCUCUGAACUAGUCUGCGCUUGGACUCA  
>N3545  
GACACUGUCAAUAGGACAAAACUACAACCAAAGGACUGGAA  
>N3546  
CUUUUCUACAAGAUUCUUGAACUCCAUCUAUUGUUUGUGUG  
>N3547  
AUCACCAUAUUGUUUCAAGACUUUCUAAAGAAACAACACC  
>N3548  
CUCCAGAGCAGAGAGAUUGGACUUUUGACUUGUUAACGGGU  
>N3549  
GCCAGAGUUAGCAGAGGGAAACUUGUGUGAUUGCCUAUCAA  
>N3550  
AAAGUCUUAAGAAGCUGGAACUCAGGGUAUUGAUCAUGGG  
>N3551  
GUGUAGGGGUGUCUAUAUAAACUUCCUCUUAUGUGUUGGAA  
>N3552  
GAUAGGCAUACAUGC UAAAAACUGUUAUUGAUUUUGAAAGA  
>N3553  
CUUGUUUGAUUAUAGCCAGGAACUCGAAAUAGCCAGAUGCC  
>N3554  
UCAUUUCUCAUUGGAGUAGACUUUUGGAAUGGUUUCAGAG  
>N3555  
GUCUUGUAAGGGGUUCUCAAACUAGGAGAAUUUGCAUUUCA  
>N3556  
AAUAUUCAUUCUACUCAGGACUUACUCAGGACCUCUCAUA  
>N3557  
GACUAGACUAUAGACUAUAGACUAUAGACUAUAGACUAUAG



>N3558  
GUGUCUUUUGCCUUGCAGAAACUUUGGAGUUUCAUUAGGUC  
>N3559  
AUUUUCUGAGGAACCGCCAGACUGAUUUCAGAGUGGUUGU  
>N3560  
GUUGUGUCGGGGUGCCUAGGACUAGGUGGGGUGGGAGUGCU  
>N3561  
ACCAAUAGAAACAAAAGAACUGUACAAAGAAUCUACCAA  
>N3562  
AGAGAGACUAACCACAGAAACUGAGGAAAUUCACAAAUC  
>N3563  
CUAAUUACAAUACUCUUCAAACUAUUCUACAAAUAAGAAAC  
>N3564  
GUAUAUUUUACCCUACAGAAACUUUGCAAUUUAUGAGGCC  
>N3565  
AUAUGGCUGGCCUGAUUAAACUACCUGAUUGAUUAUUCAA  
>N3566  
UUCUUUGAAGGUCUGAUAGAACUCUGCACUAAACCCAUCUG  
>N3567  
ACCUGGAGUCCUAAUCAGAAACUCCUUGUAGACUGCUUUCU  
>N3568  
GGUACACAAUCACAAAAGAACUCAAAUGAUUGUACUCAC  
>N3569  
AAAUUAGCUAGUAGGAUGAAACUUCAGGUAUAUACCCAA  
>N3570  
AGCAGAGACAAUAAUAUGGACUACACCACCAAGGACCUCU  
>N3571  
UUUACAUGAAGAAUAGAGAACUCAAAUGAUUUGGCCUAAG  
>N3572  
GUUUUUUUAUACUGUCUAAGACUCACACUAACUAUUUGUAC  
>N3573  
GGAGUGUGUGUGUGGGGGGACUUUUGGGAUAGCAUUGGAA  
>N3574  
AAACAGGACCUUCCCAGAAACUGUGUUGCUUUGGCCUGUC  
>N3575  
ACACUGAAAUGACAACAUAAACUAAUUCACUUUAAGCUUU  
>N3576  
GAGGCCUCUUGGUCUUGCAAACUAUAUAUGCCCAGUACGGG  
>N3577  
CACAGUAAGCUUAAGGUGAGACUACACACAGGGCCUAUAUG  
>N3578  
ACGGAAACUCACCUCUGGAACUUUGGCAUUCUCAUAACCC  
>N3579  
CCUAUUGACAAAGAAUAAGGACUACAAAUAAAUAAGCCUUU  
>N3580  
CCUUUCUAACUAUAUGAAGAACUGAGUUGGAAUUUUGAUGA  
>N3581  
CACCAGACAUUCACCAGAAACUAUGAAAGCCAGAAGAUC

>N3582  
ACUUCAUAGAGUUUAAUGAAACUGAAGCCACAACAUACCCA  
>N3583  
AAAAAGCUAUUUAACAAAACUGGAAAUCUGGAUGAAAU  
>N3584  
GUAACCCACUAUUAACAAACUCAAAGACAAAACCACAU  
>N3585  
CACCUGCAAUACUUUCUAGAACUUUACACAGUCAGCAUGCA  
>N3586  
GCUUGCUGAAAAUCCUGGACUUUAAUUGCACUUUCUAAA  
>N3587  
AUAAAACCAGAGACACUGAAACUUAUAGAGGAGAAAGUGGG  
>N3588  
UGCUCUGAAAGGAAUAAAACUGUAAUUC AUGUAAUGUAU  
>N3589  
CGUAGGAGCGAUCCAAAAGACUUCAACCCCCACAGUCCUG  
>N3590  
GAAGCCUCCUCGAGCUGGGACUAUAUAGAGUAACAGCCA  
>N3591  
UUUGCAGCUUCUAUUCUGAGACUCGGUGCUACAUUUCCAC  
>N3592  
AAGCAGGGAGAACAGAGAGGACUCUAGCUGCUUGCAGAGAC  
>N3593  
CCCACAGGGCAGCCUCGGGGACUGCAGUGGCUGGAAUGCUU  
>N3594  
AACCUAGAAGGACUCAGGAGACUCAAAUUGUGUUGAAAAGC  
>N3595  
UUGUCUUUGAAAAGACAAAGACUGAAGUCAUUGUCACCCUU  
>N3596  
UGUGAGACAGAAGAUGUUGGACUCCCCAGAAACAUUUUUA  
>N3597  
UGCACUAAUUGCUCAUUAAGACUUGACUAAUACUAUAUGU  
>N3598  
AGGGUUCAUUAUUGGACAAAACUGAUACUUACUUUCUCCU  
>N3599  
AAUUGUUCUUUUGGAAAAGAACUGCAGGGACAAA AUGGAG  
>N3600  
CCUAUGGUGAGUGGAAAAAAACUUCUGCCAGGAGGCAGGUU  
>N3601  
UAAUGAGACAU AUGUAUGAAACUCUCACAAGAAAUCUUACU  
>N3602  
CAUCCAGUUGCCACUGGAAAACUUGCACAGAGAUGGCAGGA  
>N3603  
AUUUGUUCUUAAGGAUAAAACUGGCCAAUUUUGAUAAUUC  
>N3604  
UUGUUGAAUAACUGC UAAAGACUAAGUGAUGUAAUAAAA  
>N3605  
AUAUGGUUUUAGGGAAUGAAACUGGUGUUUCCGGAAUGAGA

>N3606  
ACUCAUUAAGAAAACACAAAACUUAGUGGUGCAAUAGAUC  
>N3607  
UUUAUUCGUAAUAGCCAGAAAACUGGGAAGCAACCUAGAUAU  
>N3608  
UUAUAUGCCAACAAAGAAAACUGACAAUCAUGGAAUAAUC  
>N3609  
GGUGCAUCCUCAAAGGGGAACUGCUGCUACCUGCCCUGCA  
>N3610  
AUCCUAUCAGAUACCAUGGACUAAGGCUGAUCUCAAUAA  
>N3611  
AGACUGGCUACACAAACAGGACUCAACAUUUUCCUGCUUGC  
>N3612  
AGAGUCAACAAAGAAAGAGAACUUCAUACCAAUUCCCUUA  
>N3613  
GGAGAAAUGAUUACAUUAAAACUGAAUGAUUAUGAAUAAUUC  
>N3614  
AAGAGGUUGCAAAGGUAAAAACUGCCAGUCACAAACAGCAA  
>N3615  
CUUGC UCCAGCCCACAUGAACUGUUGCCAUGGCAGCAAGU  
>N3616  
UUUGGAUGCCUGAUUUAAAGACUUUGCGCCACACUGCGCU  
>N3617  
AGACAGAUCAAACUCACCAAACUCUAGUCUGUACCACACAG  
>N3618  
ACUUUAGUGAUUAAGUAAAAACUAGCUAAUUAUUUCAUAGA  
>N3619  
UUAAAACUCUUUCCUUCUAAAACUCUAUUUAUUCUUCAGACUG  
>N3620  
GAGGAUAAAAGACAGGCUGAACUUCUAUCACAGCAAUGCCC  
>N3621  
GAAUUCUGAUCUUUCCAAGACUUUUUAUCAUGAAUGGAUGU  
>N3622  
CACGUGUUAGGGUGCCCUGGACUGGGCGAAGUGGGCAUUCU  
>N3623  
UAGAUUUGAUACUUAGUGAAACUAUAAAACUUUUCUUUGUA  
>N3624  
UUACCAUGUACACUGAAAGAACUCGUCCCAUAGACAUGGUA  
>N3625  
CCUUGAACUACCUUUACAAAACUUUAAAAGCAUGCUCCCCA  
>N3626  
GAAGGGAGUCUUGAGAAUGAACUGAAGAGAUAGAAAAUAAU  
>N3627  
CAUUCCCUCAUGCUCUGGAAACUCUGGCCCCUGCCUAGUU  
>N3628  
GAAGAGCGCAAGAGCAGAGAACUCAGAUGUCAAUUAAUUCU  
>N3629  
UCUCAUGAUCAUGAUGGAGGACUAUAAGGAGGACAUAAAUA

>N3630  
GAGGCCCAUUGGACACACAAACUUUAUAUGCCCCAGAACAG  
>N3631  
UUUUAAUUUAAAAGAUUAGACUCUUAUGGCUUUGAGUACU  
>N3632  
UGAGUUGUCCUCUUAGAAAACUUGAAAUCAGGUUACAAUG  
>N3633  
AUGGCUCAGUGGUUAAGAGGACUGACUGCUCUCCAAAGGU  
>N3634  
CCACUUUAAAUCAACAAGGAACUUUGC UAAUCUAGAAUAGG  
>N3635  
ACAACUUUAAUAAAUCUUGGACUCUCUGUGAUUAUUGGG  
>N3636  
CUAGUAGAUAGAAAUCUAGAACUUAUAGAUCUAGUAGAUC  
>N3637  
CUAGGCUCAAGAAAGUCAAAAACUGAUACAGGAAAUCACUG  
>N3638  
AUUAGCAGGCUGCUUCAUAAACUCUUUUAGUUUGAUUAAGC  
>N3639  
CCACAUGCUCUCCUACAUAGACUUGUCUCAGUGAUCCCAAG  
>N3640  
GGGACAGCUUAGUCUAAGGAACUGUAGCAUCUGAUUAGCAG  
>N3641  
GGGGUAAAUUUUUUUCCAAAACUGGUGAUCAUGUCAGUCUU  
>N3642  
UAGAGUUUUUACAAACUGAACUAAGUAACA UUGUGAGAG  
>N3643  
GUCACAACAUUAUUAAGCAAACUAAGACAGCCUACCAAGAA  
>N3644  
ACAAAGAACUCAAAAAGUUAGACUUUAGAGAACCAUACAACC  
>N3645  
AACAAAGGACACAUAUAGCAGACUUAUUUGUAAGAGCCAGAA  
>N3646  
AGGAAAUUUUUGGAGGGGAAACUAAGAAAGGGGAUAACGUU  
>N3647  
AAAUGUACUAUAAGAAAUAACUCAGUGAGUCUUAGAGUGG  
>N3648  
AAGUCCUGAAGGUUUGUGGAACUUAGGCACGGUGAAAAACA  
>N3649  
ACUACCCUUGAGUGGUCUAAACUCCCUCAUUUUGAUCUAAG  
>N3650  
AACAAUGAAUUUGAGUGAAGACUUGAAAGCUAAGAGGACAU  
>N3651  
CUUUGAUAAUAUGGGACUAAACUAUACCCAUCUUGGUGCA  
>N3652  
UAGGAUAUUUAGAAUGAAAAACUGGACACAAACUGUGCUCU  
>N3653  
UUGUCAGGACGUCUUUGAAAACUGCAUUCUUCUGCCCAGC

>N3654  
UAAACCUCUCUAUGUGGAGGACUUUUACUUCUCCCAAUUU  
>N3655  
GCUCUUUUGGAGUUCUCUGGACUGUAUCUUGGGUAUUCUGG  
>N3656  
GGGAUUGCUGUGGAGGGAGAACUGGGUUCUGAUGAUAGGCA  
>N3657  
UAAAAUAUGCACAUAUAAAACUAUUUCCUCUAGGCUCACA  
>N3658  
UGUAAGUAUAAAUCUGAUAAACUUAUUGUUAUGCAAUAAA  
>N3659  
AAAAGGAAUUAUACUAAGAGACUGGCUACAUAUUUGGACC  
>N3660  
AGACAAAUUGAAAUGGGGGACUCUGUACUUCAGAUAAAAC  
>N3661  
UAAAGAAUUCAGAAGGUAGACUCCAGAAAUCAAAUAACU  
>N3662  
AAGUGCAUUUAGCCCAGAAACUUAGGAUACCUAAGAUUA  
>N3663  
GAAACUCAAGAAGAACGAAGACUAAAGUGUGGAUACUUUGC  
>N3664  
AGAAGGGGAAAAGUGUCCAAACUUUGGUCUUCAUUCUUCU  
>N3665  
AAUCCCACCAACAAUGGAGGACUAUUUCUCUUUCUCCACAU  
>N3666  
GUAUCAUAUUCAGUAUCAAAACUUAGAAUGAUGCAAAACAA  
>N3667  
CAGCAACUGUAAGCAGCAGAACUAGUAUGUUGCUUAAAUG  
>N3668  
UGAUUACCAGGAGAAAACAGACUCUAGAGUAGUGUAGUAGU  
>N3669  
CCUAAAAAUCCAACUGAGAACUCCUAAACCUGAUAAACAG  
>N3670  
UUUACAAAAAUGCAUGGAAACUAUGAAUAUAGAACCAUGA  
>N3671  
GGGAUCCAUUUGGCAGAAAAACUGAAAACAGAGCUAUUUCA  
>N3672  
AUGUCAGACAUUCCAAUUGAACUGUUGUCAGAUGUUGACUG  
>N3673  
UGAGCAGAUUUUAAGAUAAACUCAUGAACCUUAGAGAACU  
>N3674  
AAAUGAGUACAUUGAAAGAACUUACUGAUGUGGCUGUGUU  
>N3675  
AUAUGUCCAACAAUGGAGAACUAAAACAACUUGAUGCCUC  
>N3676  
CCUACUUGUGUGGACAACAAACUGUUCUCAUUUUGUGCAGA  
>N3677  
AGGCUACUAUACCCAGCCAAACUCUCAAUUAUCAUAGAGGG

>N3678  
AAUAAAAGAAAGAAAUUAAAAGACUUUUUAGAGUUUAAUGAAA  
>N3679  
GACAAAAAGACCACCAACAGACUGGGAAAGGAUCUUUACCU  
>N3680  
GACACAUACUACUCCAACAAAACUAUACCUCCAAUAGUGCA  
>N3681  
AAAAACUAUCUUAAAAAUAGACUAGAAGACACUAUCAAUUG  
>N3682  
UUAUUCUGCUGUAAAAAGAAACUUUUUUGAUUAAACAGUAAG  
>N3683  
UGUGUCCAGUUUUCUGAGGAACUGCCAAACUGAUUUCAGA  
>N3684  
AGUGAUAAAAGUUAAAAAGAACUGUGGCCAAUAUGGGCCUG  
>N3685  
GAGAUUAUAGAUCUAAGAGAACUUAGUACUGCCACUUUGCA  
>N3686  
CAAAGGAGAAAGAGAAACAGACUGUGUAGAAAGAGGCUGAA  
>N3687  
CUACAAAACUCGGGACAGAAACUCCAGGCCAAAACAGGAAG  
>N3688  
UUCUGAAACUUGUUCUUUAGACUGACUUUGAUCUCAAGAU  
>N3689  
GGAAGUGCCAGAAAACGUAGACUAUCUAUAGGGAAGACUCU  
>N3690  
UGGUACGUACCUUCUCCAAAACUAACCAUAUAAUUGGUCAC  
>N3691  
UAAAGAUCUGUAUGAUAGAACUUCAAGUUUCCGAGGAAAG  
>N3692  
UGACAUUCAUUGAGUUUGAAACUUGAAUAAAAAAAAUUAGGG  
>N3693  
UCACACAAUAAUAAUGGGAAACUUCAACACAACACUUUCAC  
>N3694  
UGGAAAGAGAGGCCAAUUGGACUUGCAAACUUUAUAUGCCC  
>N3695  
UUUGUCAGGCUGUGGCAGAGACUCUCAAGAGUCAGCCCUUU  
>N3696  
UUGAAUCUUGGGUAUUCUGAACUAUUGGGCUAAUAUCCACU  
>N3697  
ACGGGGGAUACUAAGUAAGACUUCUUACUCAGGAAGUCAC  
>N3698  
ACACUUUUGCAUCAUCUUGGACUGCUGAGCUUUGGUUCAG  
>N3699  
AGGAAAAGGGCUGGACAAGGACUGAUACAUAGACAAUAGUU  
>N3700  
UAAUGUCUGUUUAGAAAAGACUUUCCUAUCUGAUUAUACU  
>N3701  
CAAUUUCAUUACAAAUAAACUUGAUAAAAUUGCUGUGAA

>N3702  
AACACAACAAAGCCCAGGAACUGAUGGCCUUAGUGCAGAG  
>N3703  
AAUCCUAAAUUUGAUUUGGGACUAAUAUCCAAUAAUACCAA  
>N3704  
ACCCUAUUAUAGGAAUAUGAACUAGCCAGUACCCCCUGAGC  
>N3705  
CACACACAUAGACAUAAACAAACUUGACUCAGUAUAUCACAA  
>N3706  
UGAUGAACACACUAAGUGAAACUGCCAGGGCAAUGUAAAG  
>N3707  
UGUAAAUCAACAUCCAGAGAACUUAUAUUUCGGAUAGCCUG  
>N3708  
ACAGGACAGUGAAUUAGAAAACUUUAUACAAGUCAGCUGAC  
>N3709  
AAUACUGAUCACUGAAAGAAACUCAGGUUCAGGGCCUCUAU  
>N3710  
GCAUCUAAUUUAAUUUGGGACUUGCCUAAGCAUUUAAUUG  
>N3711  
GGUUACUAACCCACAGUCAAAACUUUCUGGCCCAGAACUGUU  
>N3712  
CAUUUUGCUGCUUACAGGAAACUCAUCUCAGAGAAAAGAU  
>N3713  
CAGCCACAUUCACUAAAGAAACUUUAGUAAAGCUCAAAGCA  
>N3714  
GCAACAUCUGAUCCAAAAAAACUCAGAGCAUCUUGUGCCAG  
>N3715  
CCUCUCCAUCUUGGGCACGAACUCAGCAGGCCCUAGAACAC  
>N3716  
AUACACACCCAAAAAGCAAGACUCAGAUUUAAAAUCAUAUC  
>N3717  
ACAUAUAUAAUAAAGAACAAAACUACAAGAAUAGAACCAGUA  
>N3718  
AUAGAUAAGCCCUUAGCCAGACUUUCUAAAGGGCACAAGGA  
>N3719  
UAUCUUCCUACUACAGAGAAACUUAUGUAUUUAUGUUCAUU  
>N3720  
CACCACUGCUGCUCAGAAGAACUGGCCUGGAACUCUCAGGA  
>N3721  
ACAAAAAACAGGUGAAAGAACUGAACAAAACCAUCCAGGA  
>N3722  
GCAGACUCUACCUGUGCAGACUAAAUCCUAAGUUCGCU  
>N3723  
ACAAAUAAGAAACAGAAAGAACUAUACCCAACUCAUUCUAU  
>N3724  
UGACAAAUUAUCUCUCUGAAACUGAAACUGGAGCUCAGUAA  
>N3725  
CUGGUAGAGCCACUCAGUAGACUGCUAUAUCAUGCUUCUGU

>N3726  
UAAAAGCCAUAUGGUCCUGGACUUUGACUGAUUGGGAGACU  
>N3727  
GGAGCUGGAAGAACAUAUAGACUUCAGGGGACUAAGUAGGA  
>N3728  
ACAGAGCAAUUGUGAUAAAAACUGCAUGGUACUGGUUAUAGA  
>N3729  
UGAAAAAGAAUGAAUUGUAAACUCCUACCUUGACUAUAGUG  
>N3730  
GAGUGUUUCUGUCUAAAAGAACUCCAGAGACAAAAUGGGA  
>N3731  
AAGUAUCCUUUGAUUCUAGAACUUGC UUUAUUUUUCCAU  
>N3732  
UGAUUUCACUUUGCCAUGAACUCUGACAAGGUGAUUAUUAU  
>N3733  
GUUCUUGUGAGCUCAGCAAAACUAUACUUCUAUCCAAUUUU  
>N3734  
GUAAGCCAGCCUGGCUUUGAACUUGAAAUCCUCCUGUUUCA  
>N3735  
CCUUUAUAUAAUAACAAAAACUUUCUAAAAUAGAUGUGGU  
>N3736  
AAAGAUCCUCAUGGUCUUGAACUCAGUCUGAAUAUAACUU  
>N3737  
GCUAGUGCAGACUGGAAGGGACUUGUGACCCUGGUCAGGCC  
>N3738  
UUAGUGGAAGAACUGAAGAAACUGAAGGGGAUGGCAACCGA  
>N3739  
UCUUUCUCCAGUGAUUACAGACUAUCUCCACAGAGGCUGUC  
>N3740  
CAGAUAGGGUUAACAACUGAACUCCCUCAUUACUAUUAACA  
>N3741  
CUAGUAGGUCUAAGUUGAAAACUGUUUGGUCCUUGUAAACU  
>N3742  
AAUCCCACAGAUCUUUUCAGACUCUCAGUUUCGAUAUUUAU  
>N3743  
CUUAUUAGGGGCUCACAGAGACUGAAGUAGCAAUCAUAAAG  
>N3744  
CCCGUAGACAGAUGCUAUGAACUAAAUGAGAGCCCUUGAAG  
>N3745  
AGGGCCAUCAAGCAGUAGAACUUGGCAGCCUCAGCCACAU  
>N3746  
UGGCUGUGAGUCAGGCUGGAACUCUCAGCUACUUUUUCAGC  
>N3747  
GUCACACAAUCUAAAUGUAAACUGUUAUUCAAUAGUAAGCA  
>N3748  
CUGCACAAGUGAGUGUGUGGACUACAGAAGCUAUCAGAUUC  
>N3749  
AAUCAAUGAUCUCUAGAGAACUUUGAAAUACUCAAAUACU



>N3750  
CCCAAGCAUCUAAAUGUUGAACUAUGAAACUUGUUAUAGGU  
>N3751  
AGAUGGAUUUAAAUUCAAGACUUUCUAUGAUAAAUGACAA  
>N3752  
AAACCCCCCAAAAAAAAAACUUCAUAAGUUGUACAAAGA  
>N3753  
UAAUAUAUUUGGCAAUAUGGACUUGAUUAUAGACCAGAAGU  
>N3754  
AAAAAGACACCUAAGUCUGAACUUAGUUUGUACUUGCAGCA  
>N3755  
CCCUUUUAAUGUUUCAUCAGACUUGCUCUCCACAAAGGCC  
>N3756  
ACUAGCUGCACAACAAGAAAACUACCUGGAAAGACAAGGUA  
>N3757  
UGUGUCCUUCACAACUGGAGACUGAAGCAUGUGACCUACUC  
>N3758  
GAGUUGCUCAAUGAAUCUGGACUCAGCUACCACAGCUUCAG  
>N3759  
UAUGUGCAUAGUUUAAAAAACUGCAGUGAUUAAAUGUUC  
>N3760  
ACUCAUGUGCAAAGAAAGAAACUGUCAAAAGCAAAAAAAAAA  
>N3761  
UCCAGAAAAGACACAGAGAACUGUUGUUUUACUGACAUG  
>N3762  
UUCUUUCCAGAUAAAUUAAAACUCUCGUGUCCUGGGGCCUA  
>N3763  
GAGUCAAGGCUCUGUGAUAAACUUGAAUGAAUCCUCCUUG  
>N3764  
AGCUUCAUUUACAUGUAAACUUCAAAAACAGUAAGUUA  
>N3765  
AUGUCUGAAUGUACUAGUGGACUCCUAUCUGAGUCCAGAU  
>N3766  
AUUAAACAUCUUUAAAAAAAAACUAAAGCAGAAAGAAAGCCU  
>N3767  
AAUCAGGCUAAAAGGCACAGACUUUCUGUUACAGACUGUUC  
>N3768  
UGCCUUUCAGUUUCCAAAGACUUACGCAGGGAACUUAGGG  
>N3769  
GUUUUGGAGAGACUUUCAAGACUAAUUUAGUAAUUAGGUAA  
>N3770  
UAAUUUUUUUUUUUUUUCAGACUGGGACAUCUGGUCUCUUU  
>N3771  
AAAAAUGCAGGGAGCAAAAACUGAGAAGACAAUGCAAUGC  
>N3772  
GGGACUAUUUAGAUCAUUAAACUGAUCCAGAUUUAACUUUG  
>N3773  
GGAGAAAUACUAUUAGUAGACUUUUCAUGUUACCCAAUGA

>N3774  
AUCAAGAAUUGACAAUUGGGACUUCAUAAAUUGUAAAGCUC  
>N3775  
UAAUAAUUCAAUUGCUUUAAAACUUGUAAGUUUGUGAUUUA  
>N3776  
CAAGUAGGGAUAAAAGCUAAAACUACAGCCAUACAUUUUUUAU  
>N3777  
AGUCAGUUA AUGGUGGAGGAACUUUCCUAUACACCUUAGCU  
>N3778  
UACCACUCUGCCAAAGGGAGACUAUCACAACAUAAGCAUC  
>N3779  
GUCGCCAUUCUUGGUUCCAGGACUCCCUGGAACUUAGGAAUU  
>N3780  
UCCCCAAUAAAAAGACAUAGACUAACAAACUGGCUACACAA  
>N3781  
AAAUGCAAAGGAAGCAAGGACUCUCAAUUUUUGUUUCCGU  
>N3782  
UCUUAGCAACCUGAAGUCAGACUUCUAUAAAAACAAACAA  
>N3783  
GGCUUUUAUUUGGUUGGGAGACUUUUAUGACCGAUUCUUU  
>N3784  
AGGCAAAGAGUUUCAUGGAAACUUAGCCUCCUGGAACCUUG  
>N3785  
GGAUAAAAGUAGCCAAUUGAACUUUUUGAUAAUGUCUAAA  
>N3786  
UGUUUCAACACUCAGGUAGGACUCUAGAAAAGAGCAUGAAU  
>N3787  
ACAACAACCCAGGAUUAAGGACUCGCAAUUAUGCACAUAG  
>N3788  
GAAAAAAGAGUGGAGCAGAGACUGAAAGAAAGGCCAUCCAG  
>N3789  
UAACCUCUAUGGGAGGAAGAACUCUUGCAGUCAGUGGAUGG  
>N3790  
AGUACAAAAAUGGAGAAGAGACUGAGGAGGUCCAGUGACUG  
>N3791  
GAAA AUGGCAGUACAAUAAAACUCAAAUAUUGAAUAUUUCC  
>N3792  
UUA AUCCC GAUGACCUUGAACUUGAAGAUUUAUCUUCUG  
>N3793  
AGGCUUUUAUACCAGCAAUGAACUGCUCUAUCCUAUGGUUAC  
>N3794  
GUAUUUUUACUUCUUAAAAAACUUUCAUGCUGUUUUCUACA  
>N3795  
UCUUUUUGAUAAAAGUGUCAAAACUAGAAUGGUGUAGUAAGAC  
>N3796  
GUGGGGGGAGGGUAUGGGGGACUUUUGGGAUAGCAUUGGAA  
>N3797  
UUUUGAUAGGGGACAGGAAAACUGAAAUGAUGCAAAUACA

>N3798  
CAUUGCUCUCCCCGUGAAGACUGUGUGGAAGCUGGAGUAG  
>N3799  
CAUUUCUCUGAACACUAAGAACUUUGAACAUUUUUUUAGGU  
>N3800  
AUUUCUUUAGGGGAUAUGGGACUGUUUAGAAGGUCAACUUG  
>N3801  
CCUAGUAAUACAUGUGGAAACUGGGGUGUUAAACAACUUU  
>N3802  
UCAUCACUGCAAGGGGGAGGACUAUUAUAUAAUAGGAAAA  
>N3803  
AAACAAAAAGCCAUCCAGAGACUGACCCACCUGGAGAUCCA  
>N3804  
UCAGAGCAAUAGUAAUAAAAACUGCAUGGCAUUCGCAUAAA  
>N3805  
ACAGACAGGUUGAACAAUGGACUUGAAUUGAAGAACCAGAA  
>N3806  
UACACUCAUGAAAGUGAAAAACUUCUAUAAGGCAAUGGACA  
>N3807  
GUGAGUACUUGUAUGCAAGAACUCUAUUUUUCCCCAAUUC  
>N3808  
AAAAGAAAAAAGAAAAGAAAACUUACCCUGUGAAAGGCUGG  
>N3809  
UUGGUAGAACAUAUAGUGAAAACUAUCCCAAAGUUUAAGAGU  
>N3810  
AUUGAUGUCAAGAUGUUUAAACUUUACAACAGCUAGAGCAU  
>N3811  
AUUCCAAAUAACUGACCAGACUGAAUAUGACUUUUUAAAA  
>N3812  
CUUUUAUAGCUCAGAUUAAAACUUUCUUUAUUUGCUUAUUC  
>N3813  
UCUCUCUUUUGGCUUUCUAAACUAAGGAAAUAUUAAUUC  
>N3814  
ACACAGUUUUUCUGAUGAAACUGGGUAUUUUUUUUAAAA  
>N3815  
UUUAUCAUAACUCUUCAGGACUGGCCCAUGCCCAGGAGU  
>N3816  
UCUAUUAGUUUGAAAUAGAAACUUUUUAUUCAAUUUAUUC  
>N3817  
CCAUAACAAGUUGCAAUAAGACUAGGCACAAACCCACAUAU  
>N3818  
UCAAGAUGUGGGCAUGGCAAACUUUUUAUGCAGGUUUCUCAU  
>N3819  
AGCUUGGUUUUGUUUUUUAAAAACUGCAUGCUGCAAAACUGUA  
>N3820  
UUUUAUCAGUGGUAAUAAAGACUUGUAAAGUUCUUUCCUUA  
>N3821  
AAGGAAAGAAUAGAAGAGAACUGGGCAAGGAAGGAGGAAA

>N3822  
UAAAGUUACUUGGACUUCAAACUGUAGCCAGACAGAUCAAC  
>N3823  
UGGCUUGUUCUGUUAGAAAACUAUAUCUCCAUAUCAAUAG  
>N3824  
AAAGUGCAAUAGUCAUAGAGACUGAUUUUUAAAUAAGAUUUC  
>N3825  
GGAACCAAGGAUGAUCUCAAACUCAUGACCUAUCUGUCUUA  
>N3826  
AUGAGAAACCUAUAGCUGAGACUGAAGCCUCUGGAUUCACC  
>N3827  
ACACACUUUUUAUAAUAUGGACUUCUAAAAUCAUUAAAAGU  
>N3828  
CACUGAGAUAGAUCUCUGGACUUGGAGCUAGACCAGUGGC  
>N3829  
AGGCAAGUUCAGGGUUAAAAACUCCCCGAGGAAGCACAGAC  
>N3830  
AACAUUAAAAGAAGGGUAGAACUGGAAAUUACUGGGGGCUU  
>N3831  
GUUGAAUUAUCUCUGGCUAGGACUUCAAGUACAAUGUUGAAU  
>N3832  
CAUGGAGAUACUCUUCUGGACUUUUCACUUAUUUCCACC  
>N3833  
AGGAAAGUUAUUGGAAAGAAACUUUCCAUAUAGUAGGCAA  
>N3834  
CAGAAGAAUUGGAGGAAGGAACUUGAGCAAGAAUUGGGGAC  
>N3835  
GAUAGGCCAUUGAAACAGAAACUAAACAGAGACACAGUAAA  
>N3836  
CUAAACAGAGACACAGUAAAACUAAUCGAGGUGGUGAACCA  
>N3837  
GAAGGAAAGGCCAUCCAGAGACUGAAUACAGAAAUGUGGU  
>N3838  
AUCUUGUCUCAUAGCAGGAACUGAUUGAGCAUGAAGGUGU  
>N3839  
UCUAAGCAGAGCAUCUCAAACUCCUUUCUCAAUAUUACA  
>N3840  
UUACAUGUCAAUUCAUUAACUAUCCAUGCCUUUUUCCA  
>N3841  
UGUGGCUUCAUUUUCAUUAAACUCUAAAAAGUCUUUAAUUU  
>N3842  
UCUCGAGUCGAGCGGAAGGGACUUGUGCCCAGAUCCAGGCC  
>N3843  
UUCACCAUUGGGGUCCCCAGACUCAGCCCGAUGUUUAACUA  
>N3844  
GUGAGCAAUAAGUGCUGAAAACUGAACCCAAAUCCUCAGGA  
>N3845  
UAAUUAAAUAUUAUAAUAAACUUGAAGUAUAAUAUGCUGC

>N3846  
CCGAUGAAGAAGCUAACGAGACUUGACAAGCAAUGGUGCUC  
>N3847  
CAUUGUUUUUUUAAAAAAAAACUUGUAAACACAUUCUGUAU  
>N3848  
CUGCUUAGGAUUUCACUAAAACUUCAAACUCUAUUUUCAUG  
>N3849  
UGGAACUCAACUCUAGGGGAACUUCCCCUAUUUAGUUGAUU  
>N3850  
GUGGAUGGUCAUUGCGUGGGACUAGGGUGCCAACUAUUCGC  
>N3851  
UAUUUGCACCCAACCAAUGGACUGAAGCAGCUGACCCCUGU  
>N3852  
AACAAAGAAUUAUUCUCUGAAAACUUGUGCUGCACGAUGAUUU  
>N3853  
AUGUAUGGCCCUUUCUGGAGACUGUGUAUGCAGUAAACAGU  
>N3854  
UGAAGCCACAACACACCCCAAACUUUUGGGACACAAUGAAAG  
>N3855  
ACCCAGUUCUUGGCUUCUGAACUUAACAUAUUUGUUGAAGAAU  
>N3856  
CAUUUCACUAAACUCAGGGACUAGAAAAGGCUGCCCACUU  
>N3857  
UGGUGUCUUCUGGGAAGCAGACUAGCUAGCAGUCUUUCCCA  
>N3858  
AUGCCCAAUAGCAGAGAAAAACUUAUAUGAAUACUAUUUCU  
>N3859  
AGGGGACUUUCAGAGAGGAAACUAGGAAAGGUGAUAGCAUU  
>N3860  
UCGUGUCUGGCGUGCUCAGAACUUCUCCUCAUAAACUUUUC  
>N3861  
GGAGUCUCCUUGGCUCAGGACUCCACAGAGGGCAGGCUGC  
>N3862  
AGUAGCUGGAUAUAAAAUAAACUCAAAACAAGUCAUUGGCCU  
>N3863  
AUAUCCAACAUAUAUAAAGAACUCAAGAAGGUGGACUUCAG  
>N3864  
AUGUAGCUGUCUCUUGUGAGACUAUGCCGGGGCCUAGCAA  
>N3865  
UAAAAAUGCAGAAGCAGGAGACUCCAGGGCCAAUCUGAGCU  
>N3866  
CAUAACAGUAACUCCUAGGAACUGUUCUUCAGAUACAAAA  
>N3867  
AUAGGUUUUAAGACUAAAGAACUCAGAUUCAGAAAGCUAGC  
>N3868  
UGACAUUUGAAAUUCUGGGAACUUUCCAAAGGAUAUACAAA  
>N3869  
UAUUUAUAGAAAAUAUUGGGGACUGUUCAGGUGGUCAGCUGU

>N3870  
AAAGUUACCAAUACUAUGGACUGGACAUUUUAAAUGUAUA  
>N3871  
AGGAGGUUAACAAUGUCAGAACUUGCCUGCACUGGGUUGGC  
>N3872  
GAGAAUGCACUGUGAUACAAACUCUCUGGAGAGUCAGGAAA  
>N3873  
GUUGGAAUCGAUUAAGAGGAACUAGGUAGGUAGGUGAAGUU  
>N3874  
GAAGUUAGACUUUAAUGAAGACUUUUAGCCAGUCUGUGCAG  
>N3875  
UGGAAAUGAAACUAUUCAGACUCGCGGCCAGAUAGCGCUU  
>N3876  
AAAGAUAUUGCCCUUCCAGACUUUGAAAAUAAUGUAAG  
>N3877  
UCCCUUAUUUGGGCAAGAAAACUCUGUUCUCCAUCCCUU  
>N3878  
UCAUGUAAAAUAAACCCCAAACUCCCAUGGCUACCCAGGAU  
>N3879  
UCAUCCAUCCAAAACAAGGGACUAUAGGUAAUAAAAGGUCA  
>N3880  
AUCUGUAAAUGUUUUAUAAAACUUAUUGUGCAUAAUGGAUU  
>N3881  
CCUGACAGCAGGGAAAGGGAACUUAUAAAGCCUACCUCAG  
>N3882  
AUCAAAUAAGUAGAGAGAAACUGAAAGUAAUACACUAAA  
>N3883  
CAUUUCCUAAACACAUGAAACUCAAGAAAAAUGAAGACUG  
>N3884  
AAAGGAUGGGCCAUGUAGAGACUGCCAUAUCCAGGGAUCCA  
>N3885  
UAGGUGGAACAACAUUAUGAACUAACCAGUACCCUGGAGCU  
>N3886  
CGCUGAUAAUCGGCUGCUGAACUUCUGAAAGCUAAUUGUU  
>N3887  
UCCUCUCUCCUGGAUGAAAACUUCUUUUUAUGAUUACUGG  
>N3888  
CUCCUACGUUUAGGCAGCAGACUCAGAUUAAGUUCCAUA  
>N3889  
GGUAGUCCAGAUUACCACAGACUAAUAAGUACUGUUUGAAU  
>N3890  
CUUUUCAGCAACACACAAGGACUGAGACAGGGGGUCUAUAA  
>N3891  
UACAGAUGAGAUUUGAUUGAACUCCAUGGCAUAGAUUCAA  
>N3892  
UGGGGGUUUUCAGAGGGGAAACUAGGAAAAGGAUAACAUU  
>N3893  
UACAGCACAGAUGAACUGAACUGUGAAGUUUAUAGACUAAG

>N3894  
ACACUUCUCACUAUCAGGGACUAUGGGUGAGUCUUUUCAC  
>N3895  
ACAUGAAACCCAACGUGCAGACUGGACCAUUGCCUCUACGC  
>N3896  
ACAAUAGACUCUGGCACAAACUAUAUGGAGGGGUUCUAG  
>N3897  
ACAUAUGCAACAUUCCAAACUGCCCUGUAUUUCCAACC  
>N3898  
GGUGUGUUAUAGUUUAGGGACUCUAUUGACCUGAGUGAUC  
>N3899  
CUUUAACAUAAGAAAUAACUUAUUCAGUUCGUCACAU  
>N3900  
GAAUUGUAAAGACUGUGGGACUUUAAAGUUAUUUAGAUC  
>N3901  
AAAUGUGGUUAGGGUUAUAAACUCACAUAUCCUUUGUCUAU  
>N3902  
UCCUGCUUUUUCUUUGAGGACUUUAGCUCUGGUGCCUUC  
>N3903  
GCCAUUCCCCAGCUCUAAAACUUUUGUUUAAAUAUGUAA  
>N3904  
CUCAGAGCCGAGCAGGAAGACUGUCCUGUGUUCUAGGCCA  
>N3905  
UCAACACAUUUGAUUAAUAAACUAUACAAUCAUUAAGCCUG  
>N3906  
AUCUAGCCAAGAGGUUAUGAACUCUCAGAACCCAUGAGCCA  
>N3907  
GCCACACUGUCUAAACAUAACUGGCCAGUGGGCCUUCUG  
>N3908  
AAUGCCUUAAGCUUGC UAAAACUAGUUUAUAAAUGAUAGCUU  
>N3909  
GCAGUGUCUUUGUAUUUAAAACUGAUUCAUCAGCAGGAGUG  
>N3910  
GUGAUCUUGAGGUAACCUAAACUAUUCAUACUGGAAGAAAA  
>N3911  
ACGCCACUGUCCAGCCAGAAACUCUUAAAUAACAAGUAAAA  
>N3912  
CACCUUUGCUCUCACGAAAACUUGUGAUAGCAAUACUGU  
>N3913  
AAAUGUCUUCUUUCAAAGACUAUGAGAUGAAGUGAACAG  
>N3914  
UCUCAGGGUUAGGCCUAUGGACUGUUGACCUUCACUCAUAG  
>N3915  
GAAGUUCUUGAUCCAUAUGGACUUGAGCUUUGCACAAGAAG  
>N3916  
AAGGCAUACAUCUGUGAAACUAGAACUGCAGAUGGUCAC  
>N3917  
GCCUACAGAACUCCAAUAGACUGGACCAGAAAAGAAAUUC

>N3918  
AUAAGUGGUUACAGGCUGGACUGGCACACAGCAUGUACAU  
>N3919  
GCAACAAAGCUAAAUAGAAAACUGUAACUCAGCUGCUCCAU  
>N3920  
GGGUAUGUAUCACAACUGAAACUAGAGUGAAAAUUAUCAGA  
>N3921  
UCAUAGUAAACAGCUAGAAAACUAAUUUCCAAGCAAUGGU  
>N3922  
AAAAAAUUCUACCAAGACAAACUCAAUUUUAAAACAUCAUG  
>N3923  
ACCCUUCACAACAGUCACAAACUAAUAAAACACCUUGGUA  
>N3924  
UAUGACUGC UUUCUUCAGAGACUUGAAGUUCUUAUCAUACA  
>N3925  
UAGUGAAUUAUUUGAAUUAUAAACUAUCAAAAGGGUUGCCAG  
>N3926  
UCAAGAAUCUUGCCAACAAACUAGUCUAAUUGUUGUUAUA  
>N3927  
GACUCCAGGAGCUCCCAAGGACUGAACCACCAACCAAAGAA  
>N3928  
GAAUAAUGUUAAACACUAAAAACUCAUGGAGCUUCUGAACAU  
>N3929  
GUAGACCAGGCUGGCCUCGAAACUCAGAGAUCCACCUGCCUC  
>N3930  
AAUAAUUAAAACAUUCCUAAACUUACUUUCUACAGAAACA  
>N3931  
UACAAGGAAUGAUUCUAGGGACUUGCAAUCUCCCGGAUGCA  
>N3932  
UAUCAGAUUGAAAAUGAUAAACUUUUUAGUCAAGGGAGGAA  
>N3933  
AAAGCUGCAAGCACAUGGAGACUGACAGAAGGUAAAUUGCU  
>N3934  
UAAACGAAUGAAAGCAGAGAACUGACUUAAGUAUGGAAAU  
>N3935  
AAAAAACAGGAGUGAGCAGACUGGCAGAAGUGACAGAGCUU  
>N3936  
AUAGGCUCCAACUCUUUAAAACUCUAAGACUUGAGCAAACU  
>N3937  
CAGAGAGAACACUUUUCUAGACUCUUACUUUCCUAAGGAAU  
>N3938  
UUGUAAGUAUCCAAGAAAGACUAAUUUCUUUUAAGUAAAGG  
>N3939  
UGAGCAGUUUCUGAUAAAAGACUGUGUGUUUAUGUAUCCU  
>N3940  
CAAUGAAGUAACACUAAAGACUCAUUAUAAAGAUAAUUU  
>N3941  
UUAAUUAUUCCAUGAAUUGAACUAAAUACAUACCACAUUCA



>N3942  
GCUUUGGAGGAAUGUAGAAGACUUUGGAACUUUGGCUAGAA  
>N3943  
UGAGUAUUUUUACGAUAGAAAACUGUACCUGGCAAUAAAGA  
>N3944  
AGCUAUUGUACAGAGGGAAAACUGUCACAAUGGUCGACUUU  
>N3945  
CAGAACAAACUUCGAGAAAGACUGUUGGGAGGACAGGAUGG  
>N3946  
GCUAUAUUGGAGUUCUCAGACUGGUUAAUUUAUCAAGAAC  
>N3947  
UGUCUUAUUUGACUCACAAGACUGGACAAGGAUUAUUCUUGA  
>N3948  
AACAGACAGGUUUUGUGGAAACUGAAGGAGAAGUAGCAGUU  
>N3949  
GAAAAGCUGUGUUGAGGAGACUGAAAGAGAAUUCUGGAAA  
>N3950  
CCUGGAAGGAGCCUAGUGAGACUGUCUGUAAGCCAAUGAAA  
>N3951  
AAGCAACAGAAUUAACCAGACUUUGCAUUCUAUCAUAUCU  
>N3952  
AAGGGAUUUGUGAUGUUGGGACUUGGGGGAGGGUAUGGCCA  
>N3953  
AGCAGACAGAGUCCUGUAGGACUUUAUCUUAACAAUAAAGC  
>N3954  
UCAGCUGUGAUUAAGCAGAAACUAGUAAUAUUGAAAUGAAA  
>N3955  
ACUUUGGAUUAUUUCUAAGAGACUUUGAACUUCUAAAGUGUU  
>N3956  
AAUCCCACAGCAAACAGCAAACUAAAUAAGACAAACUCAG  
>N3957  
AAAGAAGGUUACAGAAGUAAACUUGUCAAGACGAUAUUCAC  
>N3958  
UUGAUCUUGUGACUCCUGAGACUCCUCCUGAUUCAAGUCUU  
>N3959  
CUAAAAGCUACAAUAAUAAAACUAACUCAUAAGAGAAAAGU  
>N3960  
AGCAUAAAAGAUUCAGCAGAACUAAAAGUUCUACCCUGAAA  
>N3961  
UAAUGUGGGCGACUGUCUAAACUUGGUUCCCAAGGCAUAGU  
>N3962  
CCUUGCGGGUGUUGGGCAAGACUCUGCUGUCAAGGUAGCCC  
>N3963  
AGCUCCAGGGCAGGUGGAAACUGGAAGGAUCCUGACGAUA  
>N3964  
CAGGGGCUGAGAAUAACUGGACUUGCCCCUCACUGUAUGCU  
>N3965  
UGAGGCUUGAGGGCAGGUAAACUGGAUCUGAGGGCAUGAGA

>N3966  
GUGCCAACCUAGUGGGCUGGGACUGUCAUCCUGCUGGAGAGC  
>N3967  
AUUGCACCUGGGCAUUUUAGACUUUUCACCUGGCUCCUGUG  
>N3968  
UAAUGGAUGAUUAGUCUGAACUGGCCAUUUUGGUAUCCA  
>N3969  
AGCUUGUAUAAAACCUGAAAACUAUCUUCUCAAUAUAUUU  
>N3970  
CAUGGGAACUAUAAGGGUAAACUAUUUCAUUACUGUGUAGG  
>N3971  
CAACAAAUAUAGAAGAAAACUUCCAAACAUAAGAAAG  
>N3972  
AAAGUGAUUUCAGUCUAAAACUAAAAAUACAAUAUGGUA  
>N3973  
GUAGCGCUGAUUGUCCUGGAACUCACUCUGUAGAUCAGGCU  
>N3974  
AGAUGAGUGAGUGUGCCCAAACUUCUCUACAAAUAUACAG  
>N3975  
CACCCCACCUGACUUCUAAACUCCCUGGGACCUCCAAUCU  
>N3976  
GGUUAAGACUGAAAUGGAAAACUGCACAAUAUAAUACCCAA  
>N3977  
AACAUUAGUAUUAUAAACAAACUGAACAUCCUAAUCUAAA  
>N3978  
GUUUUCUUCUCUGUCCACAAACUCUGAGUUCAAAGUUAUU  
>N3979  
UUGUCCUCUAGUGAGGACAGACUGAACAAACUUUAUUCCAU  
>N3980  
CUAGCCCAAACCAUUUUCAAACUCUUAAAUAUAGUUCUGUUC  
>N3981  
CUCUUAAAGAAAGACUCAGAACUGCCACCGUUAGGAAGCAA  
>N3982  
CAGCCAGCUUGUAAUAGAAAACUCCAGGACCAGACACAGAU  
>N3983  
AAGUUCUUUACUAGGACAAAACUGGAUGAUUAACUGUUGGG  
>N3984  
UGGGGAGCAUGUGUGGGGAAACUACUGAGUCAGAAUCCUUU  
>N3985  
UUGUGCACAAGAGACCUAGAACUGAAGGAGCUUGGCAAAGC  
>N3986  
UAUCCAAAGAAACUUUGAAAACUCACAUCAUAGCAUUUUA  
>N3987  
AUGUACGUGACCAGAGGUAAACUGGCUAGGCAGAAGCCCAG  
>N3988  
UCUUUCAUAGCUGAGGAUAAACUAAAUGGUUCCCUAUGGU  
>N3989  
AAAACACAAAUCAACUCAGAACUACAGGACUCCACCAACAU

>N3990  
GUGUUAGCACUGAUGACAAAACUUUUUCCUUUUCUUACUAUG  
>N3991  
UAACCAGGAAUGAAUAUGAAACUUGCGAGUGGGUCCAACC  
>N3992  
GUACUGUGAUCUUCAGACAACUCCUGAUACCAACAAGUAA  
>N3993  
AAGCUUCCAGAGCUGUGAACUUUGAUGAAUCAGGUCUUU  
>N3994  
AAAGUAUUGUCUAGGACAGAACUUUAAAUAACCUCCAUC  
>N3995  
ACAGUAAAUCUGGAGGAAACUACAUUUCACUCAGUUUGG  
>N3996  
GAGAUUCAGUUUCACAGGGACUUAAAUCUGAUUAGCACCA  
>N3997  
UUUCAUGUAAAUCAUACGAAACUGAAAAAUUGCAGUGUGUG  
>N3998  
ACAUACCUAUUCAAUAAUAAACUCUGAACAUUGGUCACAAGC  
>N3999  
CUUUCAGGAAUUUGUUUAAACUAUCUUCAGAUCAAUUUU  
>N4000  
GCCAUUAGGAAUAAACUGGGACUGUCCAGAGAGAAAGGAC  
>N4001  
UAUUGUACUAUUAUUAUUAGACUACAGCAAGUUUUUAUUUU  
>N4002  
UGCCAGUAGCACAUAUGAACUCCAAGUCAUGAAAUCAAU  
>N4003  
GUGGUAGAAGAUAAAGGAAGACUUUGUUGAAAAUUAUGGC  
>N4004  
AAAAAUGAACAGUUAAGAAGACUUUCAUACACCUGGUUCUG  
>N4005  
GCCUUUACAGAUUUGCAAAGACUAUUAUGAAUCUUUUUUUAU  
>N4006  
UUGGAAUAGAAGCCUGAAAAACUGAAGACCUAACCUGGUUC  
>N4007  
ACUGAGACUUAGAUAAAGUAAACUUUUUAUUUAUACAGCAAC  
>N4008  
CAUUGUUGUUGGAAUGUAAACUGCUAUAACUACUAUGGAA  
>N4009  
UCAUCUGUAAAGAAAGUGAAACUACAAAAGCUUCAGGAAAA  
>N4010  
UAGUUAACCCAGGUCUAAAGACUCACUCCUCACUGUGGAUU  
>N4011  
GGGAAGGAAAGGGACAUAGACUUGAAGAAGGGGAUAGAGA  
>N4012  
AAACAGGAUAAUAUACAAAAACUUCAAGUGGUUCCUGUGA  
>N4013  
AAAGGAUGGACUAUUCAGAGACUACCCCACCCAGGGAUCCA

>N4014  
CUAGGAAAUGGAGUUUCAAAACUCAGGACAGUCUUACUCCA  
>N4015  
CAGAAUCAGAGGAUUGCAGGACUUUGGACACACCAGGAUCU  
>N4016  
AGACAGUAGGAAAUAUCAAAACUCAGGGCUAAAAUCAACCA  
>N4017  
UACAAUGAGAAUAGGACAAGACUAGAAAGAUAGAAAAGCA  
>N4018  
UUCUUUGCCUAGUUUCUGAACUAUCAAAUAGAAACAGUGU  
>N4019  
UGCUCACAGCCACACAUCAGACUGAGCACAGGAACCCCAAU  
>N4020  
GGGUUCUCUAGAGUCACAGAACUUACAGAAUGUCUCUCUAU  
>N4021  
GUAAAACUCAAGGGGGGAGAACUGGGCAGGGAAAGUACAAG  
>N4022  
CCUCCCUCUUUCUUUUUAAACUUUCUAUUUCAUUAAGCCC  
>N4023  
GCACGUGUUGGGUGCUCAAAACUGAAGCUUAAAGGGCACCU  
>N4024  
GACAAAGAAUAGAGUAUCAAAACUUGAUAAAUUUUGCAUGGU  
>N4025  
AAGCUCAGGGCUUGAUGGGGACUUACAGAGAUAGGACUGGU  
>N4026  
GACAGGUUGAAGGGACCAAGACUGGC AAAUUAACAUGAACU  
>N4027  
GAUUAUCCUGCUUGUAAUAAACUCUUAUUUUAAAAUAGUUA  
>N4028  
GCUAGGUUCCCAUGAUUGGGACUUUACUGGAUCAUAUCCCU  
>N4029  
GACUUAACAACAAGCUAGACUUCUGUUACUUUCCUUGUU  
>N4030  
CAGAUGGAGACAUCAUAUAAACUCAAAUAUGCCUGGGUAAA  
>N4031  
CAUAUUCACACAGUUCCCAAACUCAAUCCCCCUUCCUCUCC  
>N4032  
CCAAUCGCGCGGAACCUGAGACUGCGGUACAUAGGGAAGCA  
>N4033  
CCCGCAAGGGCCACACGGGACUCCCCACGGGAUCCUAAGA  
>N4034  
UCCUCCAUCUCAGCUCCAAACUUUGUCUCUAUAAACCCUU  
>N4035  
UCUCAUGAUGACGACAGAGGACUUUAAGAAGGACAAAUAUA  
>N4036  
AAACCAGUAGCCAACAUCAAAACUAAAUGGAGAGAAGUGGUG  
>N4037  
UGUACUCUUUCUGCAGCGGGACUUGGUAAAGUGUAAGGGUC

>N4038  
GUGGAACCCACAGUUAAGAGACUUUUAAUUGUAAAAAGACU  
>N4039  
AAAAAGUGAUAAACAGAAAGAACUCCUGCCCAGUGCAAUUGG  
>N4040  
GCAAGCAUUCGGUUAUGGAACUCCUCUGGACCCUCAGCAA  
>N4041  
UCCACACAGUGGCUUUUAAACUUGUUUAGCACAAGAAU  
>N4042  
UUAUUCUUUAUGCUGACCAGACUCUUUUAAGUAAAUAUCA  
>N4043  
UGAGCUACAGCAAAAAUAAAACUACAAUGGCUGAAUUACUG  
>N4044  
GAGGUCCUAUGGAACCAAGAACUAAGAGUGUGAUAGUCUG  
>N4045  
UACUCAGCGAAUUGCACUGGACUGCACGUUGUCAGUCCUGC  
>N4046  
GUAGGCAGGCGAUGAUGAGAACUCUGCGUGGCUGGUGAGGA  
>N4047  
AUGGUUUAUGGCCUUGCUGAACUCUGGGGUACCGUUUCCU  
>N4048  
ACGUUUUUUGUAGAAAUAAAACUUGUUAGCAUUGUACUGA  
>N4049  
CUUUAAAUGUAUAAUUCAGACUGGUGAGAUGACUCAGCAG  
>N4050  
AACAAUGCUCUCUGCAUGGACUGUGGCAGGUUAUACACA  
>N4051  
CAAGGGAUGAACAGUAAAAAACUCACAGAGGUUAGAGUUCA  
>N4052  
AUUUCUCUUAAGAUCAAUGGACUCAAUUUCUCACUAAAAAG  
>N4053  
CAAUCCUGUAAUUUAAAAGGACUUCCCAAGGUAUCACCAUU  
>N4054  
CCAUUUCUGGUGAAUUGAAAACUUAUACAGCCAUUUUAGAA  
>N4055  
AUAGAGUUUUCAGAUUCUGGACUUCUUUAGAGUUAAGAGUG  
>N4056  
GGUUCUGGAUUCCAUCAAGACUGGUCUGUGCAGGGGAGAG  
>N4057  
UGGACUAGGAAAAAACAGACUAGUCUGGAGCAUCCUUUG  
>N4058  
AGCUGGCAUCUUGAUCUUGGACUCCUGGCCUCCAAAACCA  
>N4059  
CGUAUCUCAAACCCUAAAAACUUGUCUUCAGUGAGGCUGC  
>N4060  
AAAUGCCACUCUACCCAAAACUCCGCAGUGGGCCUAACAA  
>N4061  
GCAGCUAGCAGGAUGCUIAAAACUAGCUUGGAAGCAUGCUGG

>N4062  
AUUAAAAAUGGGGCUCAGAAACUGAACAAAGAAUUCUCACC  
>N4063  
UCUACCAGAGAACUCCUAAAACUGAUAAACAACUUCAGUGA  
>N4064  
AAAGGAAACAGGGAGAGAGAACUGAGAAAGAGCAGUGAAAU  
>N4065  
AGAACCCAUUACAAAGGAGAACUGUCAGCAGCUGGGUGAGC  
>N4066  
GGAGACUUGGUCUGUGAAAAACUCACACCAUAGUAUGUGAU  
>N4067  
UAGUGUCCAAAUUCUCCAAAACUAAUCAAUGAUUAAUUA  
>N4068  
GUUAGAGGCUAGAGCCAUAACUUGGGAAUGCUCCCAUUUC  
>N4069  
AAAAGAUUAAUGUAGUUUGAACUUUUAUAGAGGAAUAUCAU  
>N4070  
CAUGUGUACAAGUAAAUAAGACUUA AAAAUGUAAAGCAUUU  
>N4071  
ACUCAGCUAUGCCUCACUGGACUUCUGGCCUACUUCUGAUC  
>N4072  
GAGGACAAUAACUUUGGGACUCUAACACUAGUAUUUAAG  
>N4073  
UGACACAGAACCCUUCACAAACUCGGGAGCCAAAGAUGGUU  
>N4074  
UACAUGGCCAGUAACCAUGAACUUAUAGGCAGACAGAAGAUC  
>N4075  
GGGAGCCUCCAUGGGUCUGAACUGGUUACUCUGCAUAUAUU  
>N4076  
UUGUACAUCCAGACAGGUAGACUUAUAGUGACUAAUGCUAGC  
>N4077  
GAUGAAGUAAAUCAUAAGAACUAAAACCAGGUGAUUCCAA  
>N4078  
AAGGCAGACACCACACAUGAACUGGCAUCUAUAGUUCAGUA  
>N4079  
AACCAGGGCUACAUUGUGAGACUGUCUAAAAUAAUUUAUU  
>N4080  
GAAUGAAAAAGAAAAGUGGACUUAUACUAGCCACAUAUGGC  
>N4081  
UAUAAUUGACACAUAUAGGACUAAUUUGCCAUCCCCUGAGG  
>N4082  
UAUUUAUUUAUUUAUUUAAAACUCCAGAUUUUAUCCCCUC  
>N4083  
CUUGCAACUAUAGAACUAAGACUAUGUGCCAUAUAUAUGU  
>N4084  
CAGAAAGGCUAAGAUCAAAAACUCAGGUGACAGCAGAUGCU  
>N4085  
GGACAUUGAAGCAUUUCAAAAACUUGAAUUUUUAGUUCAAGG

>N4086  
ACACCACUAGUUUUCAGGAGACUAUAAAUCAAAACCAUUA  
>N4087  
AUGUGGUUGCUAGGAAUUGAACUCAGAACCUUCAGAAGAGC  
>N4088  
UGAGUUCUAGGACAGCCAGGACUACACAGAGAAACCCUGUC  
>N4089  
AGGGGUUCAGGUCCCUAAAAACUGGCAUUUUGGAUACUUGU  
>N4090  
UACUGCAAGUCUAGUCUGGGACUACAUAGUGAGUUCUAGGU  
>N4091  
UGUUUACUUACACAGUGCAGACUGGCCUCAGACUCACUGCG  
>N4092  
CAAUGAAUAAACUGGGAAAACUGGGAGUAGCAGCAAUUCU  
>N4093  
AUCUGGCUGAGUAAGUGAAGACUUGCCCAAUAUUCUAAUAA  
>N4094  
CCACAUCAAGGAAGGAGAGAACUGAUUCCACAGCCUUGUCC  
>N4095  
UGGGUAUGUCUGCCCUCAAACUGUCUCUCCAUCAUCAAC  
>N4096  
UGGGAGACCCAUCCAGUUAAACUAAGUAAAUAAAAGCUAUC  
>N4097  
CACUAAUGAGACACAUAAAACUUCAGCUUUGAGGAAGGCA  
>N4098  
CUGGGUGAGGUAAACAUAGAACUUUUCCUACCCCUUGGCAC  
>N4099  
CGCAGUUUGCGUGUAGCCAGACUACAGAAACUUUGAGAUCU  
>N4100  
GGGUUAGGGUCACCAUCAGAACUGUCUGGGGGGAGAUGUAC  
>N4101  
UGCUGUAUGUAAUUGAGUGGACUCUGACUUUCACCCUCU  
>N4102  
UCUACUUUUCACUGUAAAACUUAGUUUGUUUGGAAUCC  
>N4103  
AGUUUCAGCUUUUCUAGAAAACUGGGCAAACAUUUGAGUGG  
>N4104  
UGCUGGGUGUUCUCCCAAGACUAAUGCUGUCAGUUCUUUC  
>N4105  
UUUAUUUAGUCUGACUCAAACUCCUGGCAAUCCUGCUAUC  
>N4106  
GAGACUCCGAGCGAGCAUGGACUUGGAAGCAACAUCCAAGC  
>N4107  
AAGAAGCAAGCACUCAAUAAACUUAUAAAGUAUAUAUUAUA  
>N4108  
ACAAUACAACAAACACAGAACUCCUUUCUACAGAGGAGGG  
>N4109  
AUGAUCUCAAUAGCAAGGAACUGAUUCAUAAAGCAUGCCU

>N4110  
UGUGAGGAUUAUGUCAUGAAACUAGGUUAGACUAUUAGGGU  
>N4111  
GAAAAACCAUUCAAAUCUAAACUAUUUUCUCAACACCAUAU  
>N4112  
UAGCUGGGUCUUGAGGUAGAACUAUUUCCAGUUUUCUGAGA  
>N4113  
GCCACAACAAUCCACUCAGACUACUCUUUCUGCUCACUC  
>N4114  
UUAUCCUGAGGCAAUUUAAACUACUGUAAAGUUGUAGUGA  
>N4115  
UAUCCCCAGCACCACAUAAAACUAGGCAUGGUGAUACACAC  
>N4116  
GGUAACAUCAAUGUCAGAAAACUUUGUAGAAACCCUCUGCU  
>N4117  
GGCUGACAAUGCUCUCCCCAAACUCCAUAACUAGCAGAUAC  
>N4118  
GACACUGAUCAGGACCUCAAACUCCAUUUUUAAGUUUCUU  
>N4119  
UCCUCACUGUUGUACGCUGGACUGAUUCCCAAUGUCAGAG  
>N4120  
GGUACUAUGACAGGACAGAAACUGGACAGAAAGCCAAAACA  
>N4121  
GCUAGUGAUUGAUUCCAAAGACUUUAUCUAGCAGGCACGAA  
>N4122  
CCCACCCAAAUACCAAUAAACUGUGACCUCUGUUCAGCUC  
>N4123  
CUGUUGUUUCUCCAUUUCAGACUGGGCCUAUGACAGGUGGC  
>N4124  
UCUGUAGUUUGAGAAAGUAGACUGGAAUCACCAUUUUUAUU  
>N4125  
GUAGAUCAGGCAUGUCUGGAACUCACAAAGUUUUGCCUCC  
>N4126  
AAUACAAUAAACUAAAGCUGGACUAGUGAACAUCAAAGGUGU  
>N4127  
AAGUGAUUUCUUCAUAUGGACUAAAAGGUCUUCUCUGUGU  
>N4128  
CUGCACACUCACCUUUGCAGACUAGUCUCGGAGGGUUAAGC  
>N4129  
CUGAAGGCUGCUAUGAGGAAACUACAAUUCUAGGCAGCUAG  
>N4130  
GGGAAAUCUACCAAGAUGAACUCUCAAUUCUGAACAUUA  
>N4131  
AAAGCAGUGCUAAGAGGAAAACUCAUAGCUCUGAGAACCUC  
>N4132  
UUACAGAAAUUGGUACAAGGACUAUGUGGAAUUGCUGUGAU  
>N4133  
AUAAACCCAAUGUCUUCUGGACUAACCGCCAGCAUUCACGC



>N4134  
AUGUGGGUGCUGGAAAUUGAACUUUGGUCCUUUAAAAGAUC  
>N4135  
UUCCCUGGAAUCAAGAGCAAACUAUUUAGCUGUACUUUAUG  
>N4136  
CUUUAAAUCUGAGUGCUUGGACUGUCAAUCCUGGAGUUACU  
>N4137  
CAUUACAUCCUGCUCCUAGAACUCAGUAGGUCAGCAUGUAA  
>N4138  
GGGCUUUGUGAAGCUGCUGGACUCCACAGAGAGAAAUGAAC  
>N4139  
UACUACUUCUACCAAACUGGACUGCUGAAGUGUUUGCAAGU  
>N4140  
UUUAGUAAUUACAUCCAAAACUAUGAUUGGUGGUAGGGUG  
>N4141  
GUUUUCUCACUCACCUGGAGACUGAUUCCAAUAGAUUUCUU  
>N4142  
AUA AUGGACUAAACUUGUAAACUGAAACCCAACCUCAAGUA  
>N4143  
CUGUGGUCUCUUGACUAAGGACUGCCCGGAUAACUGGGAAU  
>N4144  
UGUAAUCUUAUCUCAAGAACUAGCUCUUAUAGUUAUGUU  
>N4145  
UGCUAAGCCUGAUAAACUCAAACUCAGUACCUGUGUCCAAA  
>N4146  
AGAAGAUCUUCGGGAGGUAGACUGCUGUAACCCAGCUGAAC  
>N4147  
AUGAACAAAACCAUACUAGAACUAAAAGGGGAAGUAGACAC  
>N4148  
GAUAGAGGGAGAAAGAGAGGACUAAACUGAUUUAAACAGACA  
>N4149  
GUUUCUUAUUUUAAAUUUGGACUUCUAACUACCUCUUAUU  
>N4150  
CUAGCACGUUUGAGCACAAACUCUAUGUAAGGAAUACUUC  
>N4151  
CAAUAUAAUUCUUCACAGAAACUGUACGACAAUUUUAAACU  
>N4152  
CUGUGACCGUAUGUUCAGGAACUGCACAGGUUUGUUACCAU  
>N4153  
UAAUGAAUAACUUGAAAUGAACUCACCCUGUCUACUACAC  
>N4154  
CUUUGGAAUAAUAAGGCUGGACUUGUUUACACAACUAGAUG  
>N4155  
AUAAAGCAAUAGUGCUAACUACACUAAAUAUCA AUG  
>N4156  
UUCCUAAA AUACUGCAAAACUUGCAGUUUGACAAGUGGU  
>N4157  
UUUGCAGAACUGAGAGUUGAACUCAGAGUCUCAACAUAACA

>N4158  
AUGGAGGGUCAACUGGAGAGACUGGUCAUGGCUGCUGAGUU  
>N4159  
ACUGACAUGAAUCCAAAGGGACUAUUUUGUGAGCAACAAUG  
>N4160  
UGGUGAUGAGUGUCAGUGGGACUGCUUCCAGGAGAUUAC  
>N4161  
CCCUUCCAACUAAUUCAAGAACUUGAGUGUCUAGGGUUUU  
>N4162  
AGGGCAUUGGAUCUCUUGGAACUCAAUUUAUAGGUGGUUAU  
>N4163  
AAAGGAUUUGAAGAAGAGAGACUGAAAGUUUUUGAGUGUGA  
>N4164  
GUCUUGCAUGCAGCUCAGGAACUGAGACACAGAGCCCUGUG  
>N4165  
AUAUCAGCGGCCUACCAAGAACUUCCAAACGUAGGUCUCUU  
>N4166  
CUGAAGGUAAUGUUGGGUGAACUGUUGAUCUCAGAAUACUC  
>N4167  
GAAAAACUUAUUUCAAGGAACUUAAGAGAUAGCUUACAUG  
>N4168  
UUUAUCCUCAAAGAUACUGAACUGACCUGCUGUUCAGCCUC  
>N4169  
UUCAGAUGGAUCCAGUCAGAACUUCAGUCAAGCCCUGAGCC  
>N4170  
UUUUCUGCUUCUAAGAAGAACUGAAGAAUCCACACUUUGG  
>N4171  
ACCUGUGAUACUGGAUAGGAACUCAAAUAGUAGACAAAACU  
>N4172  
UAACUAAACACAAUAGUCAGACUUGCCACAAAUGUCAUAAG  
>N4173  
GGGCAUCGCGUAGACUAGGGACUUUCACAGAGGGUAAAUUG  
>N4174  
CCUUCCCAUGCCCUAAAUAACUAUUCUAUACUACAUUCCU  
>N4175  
GCAGAAGAAGCGGUGGAAAGACUCUAAGAGCCAGUAGAUA  
>N4176  
AUAAGAGUAAAAUUGUAUAGACUGAGCAGAUCUUAUUUAGU  
>N4177  
AGAAAUUGAGCUGGAAUCAACUUCAGCUCACUCUAACUA  
>N4178  
CUUGGCCCCUCAAUUCUCAGACUUGUAGGUCGGAAAGGUUU  
>N4179  
UCCAAAUGGCUGGCCAGAGACUAGUGUUGAACUUUUAGGA  
>N4180  
AAAGAUGACUCAGAGUUCAAACUGCAGAUAAAGAGUGAGAUG  
>N4181  
GCCACCAUGAAUCAUCAUGGACUAUGCACACUUGUCUGAAU

>N4182  
CACUAGUCCCUUCCUGCUAAACUACCUUGCUGCCAAGUUCU  
>N4183  
CCAUGCACUGUCUCAGAAAGACUCCCUCCAUUACCCUUGCA  
>N4184  
UAACUACAAUUUCCACACAGACUUUCCUCUCUGGAGAUGAC  
>N4185  
GGGACAGCCGAGCAGCGGGACUUCUGUUGAGAUUCCCCAG  
>N4186  
UGCCUGGAGGAGAAUGAAGAACUAGGGGACAGAGACAACCA  
>N4187  
CAGUGGGAGGAUGUGUGUGAACUUUCUGUCAAGAAAGCAA  
>N4188  
ACUAAAAAUCACAAGCGGAGACUCCCUGCUUCUCAAGAUUG  
>N4189  
UUAAGGAUUCAUUCCCCAAACUGCAGUUGUUAAAAUUGAU  
>N4190  
UGACCAGAUGUCCUCAAGGAACUGAUGACUCGCCCCACAGU  
>N4191  
UCUUUCACAGAACCAUGGAGACUAACUGCCAAGCUGACAUU  
>N4192  
AUGGCUUAGGGUGUGGAAAACUCAAGUAGUGUUCUCGGUG  
>N4193  
AAUUCUUCAUAGAUCUCAGACUGUGGUGUGGUGGCAUGAG  
>N4194  
UGACUUCACUUACAUUUAAAGACUUUUCUCAGAUAAUCCAAU  
>N4195  
UGAAAUGAUUACACUUUAGAACUCAAAAAAAAAUCCAUUUG  
>N4196  
CCGAGGCUUGGAAGCUAGGGACUUUUUAUAGAAAAGGGGUGG  
>N4197  
GCUGGAAAGAAAGUCCAAAAACUUGUCUACAGGGCCCCAU  
>N4198  
CUAUGAGUAAAGCUGCGGGAACUCCAAACUCUUGUCUUGAA  
>N4199  
UUCUUGUCCUACAUAGGUAAACUCUAGGGCUUAGUUGGCAU  
>N4200  
UCUGGGCCAGAAGGCUGAAGACUGAUGCUGUAACGUUUUGG  
>N4201  
CAGGCAGCAGAAAAAGAAAGACUGACUGGACCUGGCAUGGG  
>N4202  
GGGUGAAGCGAAGACUUAGAACUGGUCAAUGUCCUGAGAAU  
>N4203  
AGAGGGGACUAGAAGGAGGGACUGAGAACAGAGAAGGAAGG  
>N4204  
UACUGUGAAUGUUGAUGUGAACUUUGACUGGCUCCCCAUC  
>N4205  
AAAAAAGCAUUAUGAUCAGACUGAAACUAUGUCUGAUAAA

>N4206  
AUGUGCGAAUCAUGCAGGAAACUUUGUACAAGGUCAUCCUC  
>N4207  
AAAGGACUGGGCUACCCAGAACUUCCACUUUUCUUUAAGGG  
>N4208  
ACUUAUCUGGUUUCAGUGGGACUUUGAAACCAGGGAAGGGG  
>N4209  
UGCAGAAUUAUUAUUAUUUGGACUAUUGCAUAGCAAACUUUU  
>N4210  
UGGCACAUACAUAAGCAGAGGACUGCAUGGUCAGGCCUAGA  
>N4211  
AUCAUCGGCCGAGUGUCCAGACUUUUACAAGGCCUAAUGGU  
>N4212  
UAAACUCAAAUUAUUAUUAAGAACUGAAACAAUUUAGAAACUC  
>N4213  
UGUUUGUUUCUCUGGUAAAAGACUUCAAGUUCUAUAUUGGAA  
>N4214  
CUUGUGAGAUGC UUUAAGACUAUGUGUCCUUGACCAUGU  
>N4215  
CCUGACCAGAGGUCAUGCAGACUCUAAGAGAAUACAAAUGC  
>N4216  
AGAGUAGUAGACAGGAAGAAACUGACAAUUCAAUUUAAAAG  
>N4217  
ACAUAGACAUAGACUAACAAACUGGCUACACAAACAAGACC  
>N4218  
GGAAGAU AUGGUAGAGGAAAACUGCUUGUCUUAUGCCAACU  
>N4219  
GUAGACAAGGUUGGUCUCAAACUCACAGAAAUCUGCCUCC  
>N4220  
GGACCAACAAAGAAUCUAAGACUUGACCACCUGUGACUAGG  
>N4221  
AUUGCUAUGUCAGUGCUGAAACUGAAGAGGAAGAAUGCUC  
>N4222  
CAUUUUGUUUUUCCAAUCAGACUAAGAGCCUCUGGACUGCA  
>N4223  
ACAUUGAUGCCAUUUUAAAAGACUGAUAAA AUUGUUUUAAGA  
>N4224  
CUGAUAAA AUUGUUUUAAGAACUAGCUGUACUAAUCAAGU  
>N4225  
GUUUUAGUCCCUCUUUGAGGACUUUGUGACCGAGAAAUGA  
>N4226  
AAGUCACUUGUAUUAGGAAAACUCAGAAGUUUAUUUAGUGC  
>N4227  
GACUUGGCCAUUCUUUAUUGAACUGGGGCAUGC UUUGCUGAU  
>N4228  
UCCUAGUAGGAAUAUGGAAGACUUUGUUGUUGGAGUAAUU  
>N4229  
UUUCAGAAUGUGGCAUAAAAGACUGUUUUUGUGGUGUUUUGG

>N4230  
CCCCAGGGUGUGACAAAGAAACUGAUUUUCUUCUUGGAAUG  
>N4231  
GCAGGAGGACUUAACUGAGGACUGUCUGAGAGACCAAGGAU  
>N4232  
GAGGGUGAUUCUUUAAAAAAACUUCAGUGUGGUAUUUGUGA  
>N4233  
AAAGAGACUUUGAACUUUGGACUUUUAAACUGGGAUAGACU  
>N4234  
CUGAGUGCCUCCAAAAAGAAACUAGAGAGAGCACACAUUAG  
>N4235  
CAUGCUGGAGAUAGACCUAGACUCCAAACACAUUUUAUAGCA  
>N4236  
GGACUUCAUUCACUAUCUGGACUGUCUACUUGGGCCUCACU  
>N4237  
GUCAGUAAAGUAAGCCAUGGACUAGUUGUUGGGCAAAGGU  
>N4238  
UCCCAUGGUCUCAUACUCAGACUUGCUUAGAAAUCCAAAGU  
>N4239  
AUAAGUUAAGGUCAGCCAAAACUACUGAGGAAGUCCAGGA  
>N4240  
UUUUCUUGGCUUAUUAAAAACUGGCUCUGGGUGAGGUGUA  
>N4241  
UGAUUACAAAGAGAAGUAGAACUUAUGAUUUUGUAAACAUG  
>N4242  
CAAAAAUUUCCAACCUAAAACUCUAGAAUGAGACAUCCCU  
>N4243  
AAUCGAUGCCUUUAGAUAGAACUUAUAACUGCACCCUUUAA  
>N4244  
UGAUGCAGAGGCCACAGAGGACUGGCACUCAGUGUCUUUCU  
>N4245  
CUUUCAUGAAAAUUGUAAAAACUGUCUUCUGAUUGACCUUU  
>N4246  
UUUUUUUUACCAUUCAGGGACUUUUGAUGUUGAGUGCCUU  
>N4247  
GGACUGUCACUCAUCUCAAACUCCCCCAACCGGGAACAG  
>N4248  
GGACCAGAAAUAAAUCAUGGACUGUAAUAGUACAAAACCAU  
>N4249  
UUGAUCUUGACUAAAUGGGGACUGGGGGAAGUCCAGAAUC  
>N4250  
AAAAAAAAAAAAAGAAAAGGACUCUGCAAAGUGGCGCCAAA  
>N4251  
ACCAAGAUGCACUUUGUAAAACUCUGAAAAACAGUCAAAAGG  
>N4252  
AGGGUUCAGAUUAAUUGAGACUGCUGGUCCUCCUACAGGA  
>N4253  
UCAGGAGACUGAUUUGUUGGACUAGCCCAAUCAUAGCCUGU

>N4254  
UAUGGCCUGGAAUACUUGAACUGAAGUACUAGAUAAUCUU  
>N4255  
GUGUAAAUAUUAUAGGGAACUAAGCUUUGAGAUGUCCA  
>N4256  
CCAUCAAAGGCAACUUGGAGACUAAAGGUUACUUGGCGUU  
>N4257  
CUGUGACUUAGCUUUUCAAACUAAGAACAAGUCUCCCCUG  
>N4258  
CAGAGUCAUCAGACUUCAGGACUCACAUUUAGAUGAGAUCU  
>N4259  
CAACAUUCAAGAAACAAAAACUAAGAUUUUUUAUUUUUA  
>N4260  
CAGUUUAACAGAUUCCCAGACUGUUCACAUUUUCACCAA  
>N4261  
UCCUGCUAUGAUGAUAACAGACUAAACUUCUAAAACUGUAA  
>N4262  
CAGGGUAUAUCCCACAGGAAACUCAGAAAUGAUCAAUCUGG  
>N4263  
CUCAGAAAUGAUCAAUCUGGACUUUCCCCUGCAGUAGUUCU  
>N4264  
UAGAACAUAUCAUACAGACUGGACAUGAACAUACAUGA  
>N4265  
UUGUGAUUCUGGGCAUCUAAACUUCUGGGUGUGGGGAGGAG  
>N4266  
AAAACUACAUUGGGAGGUGAACUAGGAAGGAGUUUAAACAA  
>N4267  
GCAGAGGAGCUGAGAGGGAAACUCGCGACUUGAUAGCCCCG  
>N4268  
UUGUUUAAGGUAAUUGAAAACUUGUAUAACAAUAGAAUG  
>N4269  
GGAACCAGCUGAGGUACUGAACUUGUAUAUUUAAAAAAUU  
>N4270  
AAAAGGACCAGACUUUGGGACUGCUUUAAAAUUGCUGAU  
>N4271  
GCUGGGACUUGAACUCAGGAACUUCGGAAGAGCAGUUGGAU  
>N4272  
CCUAGUUGGCCCGUCAUUGGACUGCCUUUCCCUCAGUCUCU  
>N4273  
CUGGAUUUCUUCUACCAGACUACUAAAAAUUCUGUUAU  
>N4274  
AGUCUGUUGUUACAAGAAACUUGAUUUUUUUUUUCUAA  
>N4275  
CAUUAUUCUAGUAGUCAAAACUGGUCACAUGAUUCCUAAG  
>N4276  
GAAUGUUAGAACUGUUGAGACUACUGGGAUUUUUGAAGUU  
>N4277  
UUUUCGGUCCGGAUGUAGAACUCUGAGCUACCUGGAGGUG

>N4278  
GAGUUUGUUGUUCAGUAUGGACUCAGUGUUUGACGGAGUGA  
>N4279  
UGCCUGAUGGGGUGCUGAGAACUGAAUUCUAACCCUCCACU  
>N4280  
AAGUCUGAAACAGCCUUAAGACUUAUGAAUACUAUUGAAAC  
>N4281  
UUACAAAACUAUACUUGGAGACUUGGAAUUGAUUUAAGUA  
>N4282  
UCCAACCUUAAUGAUAAUGGACUGAACCCUCUGAACCGUAA  
>N4283  
AAUGC UUUAAGUCUUUUAAGACUUUUAGGGGUAUGGAAUU  
>N4284  
UAGAGGCCUCUCUGUAGAAAACUACUGUGGCCAGGACAGG  
>N4285  
UAGGAGCAUGGAUGUUACAGACUGUUCAGUGUUCUCUGUGA  
>N4286  
CCAAGGCAGAGCUGAGAAAGACUCCUCUCACAGCCGGCUUU  
>N4287  
AUAAAUACUAUAUUACACAGACUAUAUUUAUCAUAAUUUAA  
>N4288  
AGCAGGUACUUACCAUCAAAAACUACCUUGCUCAGAAGCCAG  
>N4289  
CUGUAUCUAGCUAGAGGAAAACUGAACGAUACGAACAUUUA  
>N4290  
UCAGAAGCCUAAUAAGAAGGACUUUAUUCUCUCAUACAUA  
>N4291  
CAUACAAAUCCUAGAGCAAACUGUACCCCGGGAGUGGAGC  
>N4292  
GCUUAGACCUCUCCACUAGACUCAACCAGUACAAGUUAAA  
>N4293  
AAUUUAAACACGGAUGUAAAACUUUUUAGUAUGAUAAAGUA  
>N4294  
UGGCAGGUGAUUUUCUGUGGACUUGUUUCUCUGGCCUACUC  
>N4295  
GAUUACUCACUAAGAGUAGGACUUAUUGUUUCUUAUAAAAA  
>N4296  
UAUUUUUUUAAAUA AAAAGACUUUAUUUUUAUUUUACACA  
>N4297  
GUCUGGUGGUUCCUCAGUAAACUGGACAUAGUACUACCUGA  
>N4298  
GGCUAUUACAAUCCAGAAGGACUAGGAGAUAGGUCCUGAG  
>N4299  
CAAAGGAAGUCAGGACCGGAACUGAAGCAGUCUAAAUAUUG  
>N4300  
CACUUCAUGUCCCGUUCAGACUCAACCCUCCAUAGCUAU  
>N4301  
UGGAUCAGUGCUCAGGGGAGACUUAGGUGAAGUGGCAUCUG

>N4302  
GUGACUUUCCUUCAUGAUGAACUUCAACUGUAAGUUGAAAU  
>N4303  
UAAACAAAACAAAAGAUAAAACUAAAACAAAACUAACAC  
>N4304  
UCCUUUGCCAUCUGAGGAACUGGUAGGUUAUACUUGCUC  
>N4305  
CACAGACUGUCUAGUGGAGAACUCUUAGCCUAAUUUGUCCU  
>N4306  
CAGAUUACAAUCCUCUCAAGACUUAAGAGAACCAGAUCCACA  
>N4307  
CAGACUUCUAAACACAUCAAACUUCCUACUUUCCUAUUUU  
>N4308  
UGGGUUACCAUGUGCAUUAAAACUCUAGAUUUUCAACAUG  
>N4309  
AAAUGUAAAUAAGGGUGUGAACUGUCAUAACCUUAUCACC  
>N4310  
UGGAUGUUGUGGGUGGGGGACUCAGAGUACAGACAGGAAA  
>N4311  
AAAAAUGUAUUCAGUUUGGAACUUUGGAGGGUUCUUGUUUG  
>N4312  
AUUCUGUUUUAAAUAUUGAACUGAUGUCACAGCUCACUUU  
>N4313  
UGGGUGAUCCUAUUCGUGGACUAUUUCCAGUCCACCAC  
>N4314  
UAGAAAGAAAUGCAGAGAGACUAAAGGAGCAUGCCCAAGG  
>N4315  
UAAAAGUGUUGUUUUAUGGACUCCAAAUAUUAUGAGGAGU  
>N4316  
UAAUAUGUUGUUCUACAAACUGACAGCAAGUCCCAUUG  
>N4317  
UUGCUAACAAAAGCAAUGGACUUGGAAACCACACCAGGGA  
>N4318  
AUCACUGUGACUCUCAAUAAACUACAGAAUAUUAUGGCUGG  
>N4319  
AAUUUCAUUCUUCAUGAAAAACUUUCACUGGAAUUUGCACU  
>N4320  
AUUUUUUUUUUCCUUUAAAACUGGGCAGCUUUGUCAAGCU  
>N4321  
GAGCUGAUAUGUCAAUAAAGACUACAGAAGCUAAUCUCAAG  
>N4322  
GUUAGAUCAGUAGUCAGAAACUGAUUUUAUCUGUAACCCU  
>N4323  
AUGGACUCAGUAUAGAAAAACUUUCAGUGAAGUGAGUUGG  
>N4324  
AGCUGCCUGCGGCCACACGAACUGGGUCCUGAGUGGGGAG  
>N4325  
UUUGUCUCAUUUUGUCUGAAACUUUGCUUGGUAUCUUCUUC



>N4326  
UUUUUUAGAAUUUUUUUGGGACUUUAUUUAGUUUCACUUA  
>N4327  
GAUAAAUCUGCUUAGCAAAGACUACAUUUCUUAGAUUGAA  
>N4328  
AUUCCUUUAAUAGUGAGUGAACUGUCUAGCUAAAUGCUGCU  
>N4329  
UGGUGCAAUUGUGUACUGGGACUUUCUGAAUGGGAGAGUGC  
>N4330  
AUCUUGAUUCAAUUGCUGAAACUGUUUUGUUUUACUUUAAA  
>N4331  
ACUCUCAUCAGUGUUGCGAAACUCUCUUCUCCUCAUCCUCU  
>N4332  
AUUUUCCUUGAAAAUAUGAAACUCAAAGAUCACAGAAAAGA  
>N4333  
AUUCACAGAACACACUCUAGACUAUGGAAGUCUGGGAGAAG  
>N4334  
ACUUAUAAAUGCUCUACAGACUUGCUAUUCUGACAGAAU  
>N4335  
CACAAUGUAGGUAGCCAGAGACUGUCAGUUUAAGUGCCACC  
>N4336  
UUUGAAAUUUUAGAGUAAAACUUCUAAACAAAUUCUUAU  
>N4337  
AAUCUUAGUCUUAGGGUGAAACUAGGCCUCAGGCAAGAUUU  
>N4338  
CCACCCCUCCAUGUAGCAGACUCAGUUACCAUGUGGAUCU  
>N4339  
CUUCUCAGCCUGUCAAGGAGACUUCACUGGAGUGUGCGUAG  
>N4340  
CAUCCUGUACAAUAAAAGAACUUCUGCAGGUACUGCCAUC  
>N4341  
AAUAAACAAGACCUCAUGAAACUGAAAAACAUUUGUAAGGU  
>N4342  
ACUCUGCACAAUGCGCAUAGACUGUCUAACAAAACCACCUG  
>N4343  
AUUUUCUUGUACUUCUGAAGACUCAAGAAUUAUGACAAU  
>N4344  
UUAUUUUGUAUUACACAGGAACUCAAGCCAAUAGUCUAGCC  
>N4345  
UAGCAAAAUUAUAGUUAUAAACUAGCAUCAAUAAUUUAA  
>N4346  
UGAAUCCUUUAGCUUCUCAGACUUUUUAUCUAUCAUGCUUCU  
>N4347  
ACAUUUCUUGAGUUCGUGGACUAAAGUUCAUCUGAAUGCU  
>N4348  
AUUACCUAAAAAAAAAAAAAACUCCACCAUACCAUGAAGAC  
>N4349  
UCUUACAUCUGUCUUUGCAGACUGUGUGGAAUUAUAAACUU

>N4350  
CACAGAAUGUCAUCAUAUAGACUCACAGAAAGUGACAGAGG  
>N4351  
AGAACUUUGAGCUAAAGCAAACUCUAUCUCCUUAUUUAAG  
>N4352  
GCCAUUUGGAGACAUUUAAAACUACUUUAUAAACGGUUGAC  
>N4353  
GACAGAGACAGAAAGAACAAACUAAGUGUAAGCAUGCAUAA  
>N4354  
ACAGAUAGGCUGAUCAAUGGACUAGAUUGAAGACCCAGUA  
>N4355  
UGUAAAGUUUCUGAUUGAAAACUACCCAAAUAUUUUGGAG  
>N4356  
UGUUUUUAUCUCUCUUCAUAAAACUAAGACAUCUUCUCAUG  
>N4357  
UGUGACAGGCAGGUCUUAGGACUUAUGUGAACUUUAGUUUA  
>N4358  
UUUUGUUUUUACUUUUUGGACUCUUCUUGAGUUCUUUAUA  
>N4359  
AAAGUGGAGAAUCGCCUUGAACUCAUUGGUAGAGGAGACAA  
>N4360  
CAAACAAACAAAUAAAAAAACUAACCCAACCACAGAGCAG  
>N4361  
UGCCACAGAAUAGUUGGUGAACUGGGGAACUGGGCCAUAUU  
>N4362  
CAGACCACACUGGUCUUAGAACUUCAUGCUCUUGACAUUGA  
>N4363  
GUAUCUCAGCUUGGCCUCGAACUCUGGGAUCCAUGUGCCUC  
>N4364  
CCAGCAACCCUCAGCGAUGAACUCAAGCAUUGGUCUCUGGU  
>N4365  
CUUCUUAGGGCAAGAGCUAAAACUACUUCUAUUACAACAGCU  
>N4366  
CCAUAAGCCUCAAGUCCGGACUGUAGCUUGUCUGGCCUUG  
>N4367  
UUAACACAUACACUAAUCAAACUCAGGGCUGAAAUCAACCA  
>N4368  
AAACCAGUAACCAACAUCAAAACUAAAUGGAAAGAAACUUGA  
>N4369  
GCAAGAUUUUGCUGAAAAAAACUAGAUUAGCUGUCUCUUG  
>N4370  
GGCGAGAAGUACAGUAAGGAACUAGCAAGUCCAUGAUUAC  
>N4371  
AUUUCUAGAACACAAUGAGAACUUUGUUCUCAAGGCAGAA  
>N4372  
AUUUGAAAUCACUCCCCAAAACUGAGUUGCUGGACGUAGGA  
>N4373  
GAUGCCAAAGAUUAGGAGGACUAUAAUCAUGGUUGGCAAG

>N4374  
CUGACUCAUGUCAAGGCUGGACUCCAGCAGUAUUGAUUCUU  
>N4375  
ACAUACUCUUGGCCUCAAGACUUGAAAAUAAAUGCUUCUA  
>N4376  
AAACACUUCAAACACUAAAAGACUCAAAUCUAUCAAGGUGAU  
>N4377  
GUGGGCUAGUCUCUGAGAGAACUUGAUGGUCAGGCCAGCCU  
>N4378  
UUGAUGGCUGAUUCAACUGAACUUUUUUGGCCCAAACUCCU  
>N4379  
GGCAGUGACUCGGCAAAAAAACUCUUAUGCACAUGUGCACA  
>N4380  
ACUCCUCCAUCCUGAUAAAACUACGUUGGAAUCAAUCAAU  
>N4381  
UUCCCUUUAAAAAGACACAGACUAAAAGGAUCAAUUGAUAAA  
>N4382  
UUCUUUGUGUAAGGUUAAGGACUCUGGCAAUUUUGUCAAAU  
>N4383  
ACAAAUGUGGUGAGGAUCAAAACUCAAGUCUUCAUGCUAAUG  
>N4384  
GGAAGCAGAUGGCUUUAGAGACUUCUGGGUGCCAGUUCAGA  
>N4385  
CUGUAUCCUUGACCUCUAAACUGAUGUUGUUCAAGGAAUG  
>N4386  
AAAUCCUGACUAAGACAGGGACUAUAUAAACAUCAAGGAGU  
>N4387  
GCUCCAGCCCUAAUUUCAGACUACCCAUAAGAAGGGUCCU  
>N4388  
UUUU AUGUCUACAAUCUUGAACUAUUCUUGGUGGUCUGAUU  
>N4389  
UGUGAAAUAGUUUGAAGAGAACUGCUAUUAGGUCUUCUUUG  
>N4390  
AUGAGUAUCUACAAUUACAAACUUGACAGCCCCAGUGC UUA  
>N4391  
GUUUGGCAUGGACCUUCAAACUUCAAAGCCCACUCCCAGU  
>N4392  
UCCCCAUGGUUCCUGCUAAACUGUGAACUCUAUGAAGAAA  
>N4393  
GGUGGAAUCACCAUGCCUGAACUAAAGCUUUACUACAGAGC  
>N4394  
UUCUUUUAAUUUGGUUAUAGACUGUUCUAUAGUUCUAAGAU  
>N4395  
CUCAUUAAGCACUUCUCAAGACUGUUGAAUUGGAGCAUGAG  
>N4396  
ACAACAAGAGCGAACACGAGACUAAGACAAAAAGAAACCA  
>N4397  
CAAGAAGACACUGAGACCGAACUCAAA AUGUUGAAGGCAAG

>N4398  
GGGGUGGCUAGCCUAGAGAACUAGGAUAGAAUCAUGGGAG  
>N4399  
UUUACCUUAGACUCAGGUAGACUCUUCAGGCAGGGCAUCUC  
>N4400  
CCAAACUCCUAUAACCAAGGACUGGAGAUACUUAUAACCU  
>N4401  
AUAGAUUUUAUAAAAUUUAGACUUUUAAAAACAUAUAUGUC  
>N4402  
AGGAUGGUGCUAUUAUUAAACUUGUAUACUGGGUCAGGAA  
>N4403  
GGUCCUCUUUUUUUCCUAGACUUCAGCUAUAUGUCUCUUU  
>N4404  
CAUGUCAACAUAAAGUUGAACUUUAUCUUACAGUAAUUAU  
>N4405  
CUUGUUUGUUUGACUUGUAAACUUUAUAUGCCCCAGUACAG  
>N4406  
UAUCUUUAGGAAGUGGUAGAACUGGGUUAUAUCCCCAGCU  
>N4407  
GACUCACCCGAAAAUCCAGACUGACCAAGGGAAUACUGAU  
>N4408  
CUAUAUAUCAGGCUAGGGAGACUGGCCCAGAUCUCCUUCU  
>N4409  
GAUAGAGACCUCCAAUUUAAACUCUCUCCACAUAUAUGUCCA  
>N4410  
AUGAUCCCAGUCUAUUCUAAACUAAAGGCAGGUUUUUUUUU  
>N4411  
AUUGGAAACAGCUACUCUAGACUGCUAGGGAUUUUUUUUA  
>N4412  
AUGGAAGAGUUAGGGAAAAGACUGAAGGAGCUGAAGGGGUU  
>N4413  
AGGGGGGUUGAGGAGGAGAAACUGGGAAGGGGAUAACUCU  
>N4414  
UCAAAAACCCAUUUGCUAGGACUCAUUAUAUUUGCAUGUUU  
>N4415  
AUUUGGUGUCAACUAUUAGAACUCCCCAGCCACAGAUACCA  
>N4416  
UGAACCAUGUCACUAGAAGAACUGCCAUGGAACUGGCAAGG  
>N4417  
AAUAGCAUUGAGUUUCUGAAACUCGAGACAAUUUCUAAAAU  
>N4418  
AUGGGCAUGAUUAUAACAGACUGUUUUUAUUCUAUUAAAAU  
>N4419  
AACAGAUUAAGUGUAUAGAACUGUAUUUUUAAAAUUCAA  
>N4420  
GCUUUAGAUCCAUUCUCUAGACUGAACAGAACGAGCGAGCA  
>N4421  
AAACAGAGUCGAAAAGGUGGACUCCAUCAGCAUGACCCA

>N4422  
UAAAUGUUUUUUUAUAAGACUUGCCUUGGUCAUGGUGUC  
>N4423  
CCCCAAGAGGAAGCAGGUGAACUGCGUGGAGCAACAAGAGG  
>N4424  
UUGUGAAUCAGGGACUGUGAACUAUGGAGUGAAGGGUUCAG  
>N4425  
CAAUACACCUUGAGAACUAAACUUUCUCUUUGCAGGUAAGA  
>N4426  
UGAGCUAACAAGAUUCCAAACUAAUAUUAUGUGACUAAGG  
>N4427  
GUAAGAACCAUAAAAUAGAACUUUAUAUCAUAUUUUUAAU  
>N4428  
UUUCUAAACUUGUAGAUACAGACUGUUAUCAGACAUGUUUC  
>N4429  
UAUGGCUUACAUUUGGAAAGACUGAUUAUUAAAAUAUAC  
>N4430  
UGUAAGGAAGAAACAUUAAAACUUAUAUAAUUAUUUUUCU  
>N4431  
GCUUGAGGCACAACAGCUGAACUUAUUCUCUGGUUCCUCCA  
>N4432  
UGUACUAAAUCUCCUAAGAGACUUUCGACAGAAGUUAACAC  
>N4433  
GAAUAUUGUAGUGUAGAAAACUGGAGAGACUUAUGCUAUA  
>N4434  
GGCCUUUUUUGGAUGGGAGACUAUUAUAACUGCUUCUAA  
>N4435  
GACUCUAAACUUACACACAAACUGUGCCCUAAAGUUAUUC  
>N4436  
ACAUAGGUGCUGGUAUUGAACUCAGGUCCUUACAGUUGCA  
>N4437  
AAUUUCUUGUUUCUUUGGAGACUCAGUUGUGUCAUGUGAUG  
>N4438  
CUAAAUAACAAUGGGGAAAACUUUAGGAGGAGUGGAGCUA  
>N4439  
ACAUACAAGAAGCCUACAGAACUCAAAAUAGACUGGACCAG  
>N4440  
CUAAUCCCAGUUCUUCACAAACUAUUCACAAAAUAGAAAC  
>N4441  
CACCUGAUUUCUUAACAGAGACUCUAAAAGUUAGAAGGGCC  
>N4442  
CUAAGUGUCUCAAAGAAACUGGAGAGAGCUUACACUAA  
>N4443  
UUAUCUUAUUGGCAUCAAGAACUGGUCUUGAAAACAGCUGU  
>N4444  
AAAGUGGAUUGAGGGUGUAAACUUUCAAGCCACCCCUACU  
>N4445  
CUAAUCAAGAUGGACAGAGAACUACUAUAACUUGGAAAAGG

>N4446  
CACAUUCUGAGAGUGGGUGGACUCUUCUAUGCCCUGUUACA  
>N4447  
UCUAAUACUCAAUAAAGUAGACUUUCAAGCAAAGUUAUCA  
>N4448  
AACAAAUCAAAUGGAAAGAAACUUGAAGGAAUCCACUAAA  
>N4449  
GGACUUCAUAAAAUUUAAAAACUUCUGUAAGAAAGAGGACA  
>N4450  
AGAGGUUCAGGGAAGGAGGGACUUGUGAGGGAGAGAGGAGG  
>N4451  
UCUGAUAACAAUAUGUUAGACUCCUAACCCAGAACCACCUC  
>N4452  
ACACAAACUCAUAGGGUGAACUACCCAUCAUCUGUUGAUC  
>N4453  
UGAUGUGUGUGUAUUUUAAGACUGCAUAUUCUGAACUAGAC  
>N4454  
CACACUGACCCUAGAUGAGAACUUGGAGUCUCUCUACUCC  
>N4455  
AACUAUUUUCAAUUGGGGGACUGUUUUAAUGGGGUAAUAU  
>N4456  
UAUACCCAGGUCCUGACAAACUAGGAUUCAAAUAUAUUUG  
>N4457  
AUUAAGAAACAUACCUCGGACUGUUAUAGCGGGUGGUGG  
>N4458  
AACAUAGGAAAGACCCUUGGACUCAUUGGCACAGGGGGAAA  
>N4459  
UUAUCCUUAAAAAUUUAUAAACUUGAAAAUUUAAGGAAGUC  
>N4460  
AGUCCAACACAAGGAGGGAAACUACACCCAAGAAAAAAAC  
>N4461  
UCAGAACUGAGCCAAAUAUAAACUUUUUCUGUCUUUAUUGUG  
>N4462  
CUUUUGGGCAUAUGUCCCGGACUGGAAUAGCUGGGUCCUCA  
>N4463  
GUUGCUGAAUUAUGAUAAAAACUGAAACUCAGUGACUACAU  
>N4464  
AGACAGAGUCGAAACAUAAAACUUUCUCAGUUAUCAGAGAU  
>N4465  
AUAAACAAUAAACACUGGGACUCACACUUAUACUCAGAUG  
>N4466  
UACAGUUUGUAUAUAAAGAAACUGAUUUGGAGAAAUACAG  
>N4467  
UACAGCGUGGUGUUGCCUGGACUUAUUUCUUCUGAGUAAU  
>N4468  
CCUUGCUCACAAUGUGGGUGAACUUUGAAGAGUAUCCAAGA  
>N4469  
UCUUGACAAGUGGAACUAGAACUAGAGAAACAGUAAAUCU

>N4470  
UUUUCAGGAAAGUGAAUGGAACUAGGAAUUAUUUUGUGAG  
>N4471  
AUCUACUCUCUACACUAAGAACUUUACUUAUAGGAGCAA  
>N4472  
UAAUUAAGUAAAAAGUAAAAACUACAUUUACAAAUGUUUU  
>N4473  
CUUAUAAUAAUCAUUUAAGACUAGAGAUCACUCUUCG  
>N4474  
GUGUCAACUUUACAAUGAAAACUAACCAUUACAGUUUCAA  
>N4475  
UAGCACAUGUAGACACAUGGACUUACAAAACAUAUGAAAA  
>N4476  
GUCAGAGAAGACUUAUUAAGACUGUAAAAUGGCACUCAUA  
>N4477  
UAUCAUACUCCUCUUUCAAGACUUAUCAGAGAAGCUACUAU  
>N4478  
CUAAUAGGAGUACAUCUAAGACUAAUACACAUAGAAUAAUA  
>N4479  
UCCACUUUACUUCUGAUAGACUGUCUUGAAUUUCGUUAGA  
>N4480  
UUAAGUAUAAGUCCUCUAGAACUAACACUAUCAUAUGGAAA  
>N4481  
CCCGAAGCAGCCAGCAGCAGACUGGGGGAAGGAUAAGAAUA  
>N4482  
UUCUCAUCCACUCUCAUUAGACUGAACUCUUGGUGCUUUGA  
>N4483  
UUACAAUGAAUUAGAAAAGGACUAAAACUUCUGAGAAUCC  
>N4484  
GGUUCAGUGAGUAGCGAAGGACUGAUGACCUGAGUUGUAUC  
>N4485  
GCAUUUAAUCUGAGACUUGAACUAUUCACAUGAUAGCAGUU  
>N4486  
CAAAAAGAUUGAUUUCAGAACUACUUUAAAAAAUCAGGG  
>N4487  
CUACUUUUAAAAAAUCAGGGACUGGCACCAUUCUCUCCAC  
>N4488  
CCCCAAUCCAAUCGCGCGGAACUCGAGACUGCGGUACAUA  
>N4489  
UGACACAAUAAUUGUGGAAGACUUCAAAACUUUCAAUUACC  
>N4490  
UCAGACCACCAUGGACUGAGACUGAUCUCAAUACAACAU  
>N4491  
AGAGUGCUCAGACAAAUGAAACUCAGGAGAGAGCUAGUCUC  
>N4492  
CAAUUCUCAAGAACAAAAGAACUUCUGGGGGAAUCAGCAUC  
>N4493  
UUUUGAAACAAGAAAAUGAAACUGUGAGGAAAAGUAUGAAG

>N4494  
AGCUUUUACAAUCUUGCUGAACUCUAAACCCUAGAUCUUGG  
>N4495  
AAUGGCGACCCUGUAGGAGGACUAGCAGUCUCAAUUAAUCU  
>N4496  
GACUGCAGAUAGGAACCCAAACUUAAAUAGCAGUCCCAUAG  
>N4497  
UGCUCUCUUAUAGAACCAAGACUACCAGCCCAGAGAUGGCA  
>N4498  
GAUUACCUGAAGUAAGUAGAACUUAUAGAGGGUAGUCCUUGA  
>N4499  
GAGAUGAUUACAUAUUGUGGACUAAAGCACAGAAAGACAAA  
>N4500  
CUCGCACAUCUGGAUAUAGAACUCUCAGCUCUUCUCCAGC  
>N4501  
UAGGUGGAACAACAAUAUGAACUAAUCAAUACCCCCUGCCC  
>N4502  
ACUUAAGAUGAGAAAAGGAAACUUAUGUUUCCGGUUUUUAA  
>N4503  
CCAAUCACCCAAUACAAUGGACUGUAUUACAAUUCUAAUAA  
>N4504  
UGGCUCUUGGGAAUGGACGGACUAAUGUGACAAGAGCAUAU  
>N4505  
GAGAGCACCUUAUCUUUUGGACUGACAGGUGUGAGUCCCA  
>N4506  
GAAGCAGAAGUUUCUGGAAAACUAGUGAUGUAUCUUUGCAU  
>N4507  
AUUUGAUAAUUUACACAUGAACUAUCCAUAGCUUUCUAACU  
>N4508  
GCUAAUCAUUGUGAGUAUGAACUGCCAAGGAAUGGUCAUAA  
>N4509  
UCCUCAUAACCUACAGGGACUAGAGUCAUCAGAGAACUG  
>N4510  
UCUCAGUUUUUUUCAUCUGAACUCUCCUAACAACUUUUCAU  
>N4511  
CUCGGUGUGGACCUUAGAGACUGGUACGGACAGAAGUUUA  
>N4512  
UGGAGAGUGAAUAGGAAGGGACUGGGAGAUGAGUGGGAUUU  
>N4513  
CAUCAGACUUCAUGGUAAGAACUCCUCCUUUCCUUCUCAGA  
>N4514  
UGAUAAACCUUUUAAAUAUAAAACUCAGUCUCAGUAAUGGAUG  
>N4515  
CUCUCCCUUCAGCUGUGUAAACUACUCCUUCACGUAGCUA  
>N4516  
AAUGUAGCCUCAGCUUAGGACUCUAGUACUUGAAAGAAUC  
>N4517  
GAGGAUGUUGUCUUGGGGGAACUAGACAUUCAAUGGAAAC



>N4518  
GCACAUUGUGUCACCCACAGACUCCGUUCCUUCACCACUA  
>N4519  
UUCUGAAUAAGUUUAGUAAGACUUCCUAAGCAAUGCCAUCG  
>N4520  
GCAUUUUUUAUCCACAUUUCAGACUAGGCAGGAGCAAUCAUA  
>N4521  
GCAGGAGGAAAAGUGAAGAAACUACCACAGAGCUGGCCUUC  
>N4522  
AUAUCCUCUUUAACAGAUAGACUAAAAAGAUAAUUCAGAUU  
>N4523  
GCAUUAUCCUUCAGUUAAAAACUGUCCAUCCUAGAGAGCUG  
>N4524  
AUUUUCCUUGUACACCUAAGACUUUGGGACUUUCAAAUAAA  
>N4525  
GUCAAGCAACACAACCAGGAACUAAUCUGUAUACUAAUCAC  
>N4526  
AUUGUCUUACCCUGUAAUAGACUAUUCCAAGAAUAAGUUGG  
>N4527  
UUGGCUUCCUGGUUGGUGAACUAUGACCCUAAGAGGAAAU  
>N4528  
UAUUGGAGGAAAGAUGUGGAACUUACUAGGUUUUAUAGU  
>N4529  
UUUCAGAAAUCAUUUCAAGACUGACCCUUAUGCAAGACUU  
>N4530  
ACCCAGAGCUCUCCAACAAGACUGGCCUUGCAGCCAGCAC  
>N4531  
GUCUAUUUGUAUGUGGGUGAACUAGCCUGCAGAGGAAUACU  
>N4532  
UUUUUCUGUUGCUGUGACAAACUGAUCAAAGCAACUUAGG  
>N4533  
CUGUGUCUUGUGUAGCAGAGACUAAAUGUAGAUUUUAGUAA  
>N4534  
CCCUAAAUCCGUUUGUAAGGACUGUAUUAGUUCUGCCUACU  
>N4535  
CAAGUUAGGCACACAAAAAAACUAUAAAUGUAAUUGAUGAA  
>N4536  
ACAGGUGUUUUACAUUUCAGACUGGAGGCAAUCAGUCCAG  
>N4537  
AUAUCCAUAUACUACCCUGAACUUCUAAUCAUUCUGCAUCC  
>N4538  
CUGGCUCUUCUGGAAGUGAAACUUCAGUCUGGCACCUGACA  
>N4539  
CAGAAGGAUUUGUAGGGCAGACUUCCCCCAGCUUCACCCAC  
>N4540  
ACCUGAACCUAGCUAACAAGACUUUUUCUACAUCUGAAUA  
>N4541  
UGAAA AUGGGCCUCCAUUGGACUUGCAAACGUUAUAUGCCU

>N4542  
GAUUCAAAAAUGUGAUAAAACUAUUGGACAAAGACUUUUA  
>N4543  
AACCAUGGCCACCAUAGCAGACUUCCCUCUUCAUCAUUAU  
>N4544  
UGGUUUGCAGAGGGUUCUGGACUCUGAACGAUUAGGAGGUG  
>N4545  
UUACAAUAAAGCAAUUAAGAACUGAGAAAACUUUUUAUUAU  
>N4546  
UUCUACUAUCUCUGGCUAGAACUAUGAGGUCUAUUACAUAU  
>N4547  
CUGAGGGGACAUUCUUUCAGACUUGCUGCAUUAUCUUCUCU  
>N4548  
AUUUUGCAUCUUGUUUUGAGACUAUUAUAAGUUUAUGGAAU  
>N4549  
UUUCUGAGCAUUUGGCUCAAACUUUCUCUUCUACUGAAGUU  
>N4550  
ACGGGUCCAUCGGGCUGGGGACUCAAUUUCUCCUCGGUUA  
>N4551  
AAUAAAUCAAGGAGUAAAAAACUUGAGAUGAGUGUGUUGGG  
>N4552  
GUUGCAAAGUUGGACUACAGACUAUAAGUCAUCAAUAAUU  
>N4553  
UAAAUUCAAAAUACACAGGAACUCAUUCAGCUGAUUGCUCAC  
>N4554  
AUCCUCUCUCCUCCAAAUGAACUCCAGGGACAAAUGAGCAG  
>N4555  
CAAGAAACUAUAAGCAGUGAACUGGUAUGUGAUUAUGUGUGG  
>N4556  
UUUUUUGGACUUUUCAAAAAACUUACAUAACCACAGAACUUU  
>N4557  
UUUGAGAGAGGAAAUCUAAAACUCUUUGUGUAGCUGAGAGU  
>N4558  
GAAAUAAAAGAUGAAGUUCAGACUUUGGAUAAAAAGGAUGCC  
>N4559  
AAUGGCUGGGCCAUUCUGAACUCCCACAUGUCUAACAUAUAC  
>N4560  
GAUAAAUCUUGCAGAAGCAAACUUAUUUGGAGUUUUUCCU  
>N4561  
CAAACAAAUCAUAGAGAGAAACUUUUUUUCUACAAAAACAAG  
>N4562  
ACUACAAUCAGACAUAAAGAACUUCAAGGACCAUAAGACCU  
>N4563  
CAAUUGCUCGACAGCUUAAGACUCCUGAGUUCCUAAGACCU  
>N4564  
GCCCAAUUAACAUUGGAGAACUUACAAGAGGCUAAGGCUU  
>N4565  
GCCCAGGGUCAUAAAGUCAGACUGUGCUGAGCCUGCUUGAG

>N4566  
UCUAAAUUAGCUUGGUACAAACUUAGGACAUAGGAUCUUUC  
>N4567  
AAUCUUAAAACAAUGUUAAGACUCUCUUCUCAGAGGUUJCA  
>N4568  
GUCAAGGACCAAUACAUCAGACUCCUAUAAGUUUAACAAAG  
>N4569  
AGUACAUUUCUUGGUGUCAGACUCCAGAAGUUUUCACCCAA  
>N4570  
UAUAGCCAAGGAUGAUCUGAACUUCUGAUGCUCUACCUCU  
>N4571  
GUAAACCAUAUUCUAGUGAACUAUAAUUGGAAUAAAAGUA  
>N4572  
ACCAAUCAGAAUACGCCAAACUUCUCACUGGAGACUACGU  
>N4573  
UCACAAACAGAAGGAGGGAAACUACACCCUAGAAAAAGCAA  
>N4574  
CCUAAGAGAGUGGGAAAAGAACUGUGUUCAAUAAUUUAAAU  
>N4575  
CUGAGAGUUCCAAAAUAAGGACUCUGGCUUCUUAUAUAUGA  
>N4576  
AAAUUCUAAGUCAGUUCAAAACUUCCUAUCUAGAAAUGGU  
>N4577  
AAGUAAAAUAAGAUCCAAAACUUAUAAUGGUAUGAGAAAAA  
>N4578  
UAAAACUAUGUCCCCUCAGAACUCUCCAGGAACCGGCUGAA  
>N4579  
GUCAAUGUAUUAAAACUCAGACUUGAGUUCUUCUCAUJUGC  
>N4580  
CAAACAUGCUGCUGAACAAAGACUUCUCAUAUAGGUUCUGA  
>N4581  
UGACUUUAAUCUGAAAGAGAACUUCUAUUUCUUCUCUUUU  
>N4582  
GUGAGGUUCCAUUGGAAAAAACUUGAGUUUCCCUUCCCAA  
>N4583  
GGGCAUCGGCUCAUCCCUGGACUUGAGCGAGGGUCUCCCCG  
>N4584  
UUGC UUUAGGUAAAAGUGAGACUCUGUUAGACUAAGUAAGU  
>N4585  
UGAGUAGAAUUCAAUUACAGACUGAGUAACGUGUUUCAGUA  
>N4586  
AGGUUUGAGUUUUAGGAAAGACUUGGACCUUUCGGGUUUUG  
>N4587  
ACUCUAUCCCGUGCAAUGAGACUAGCCUCAUGGGAUAUAAG  
>N4588  
CACAUGAGGAACUGGCAAGAACUCACAGCAGCUUUGACAUU  
>N4589  
CCAGUGGCAAUCAACUGCAGACUGACCUUUAACAUCAGUUU

>N4590  
AUAUGGGGAACACAAAUGGGACUUGGGGUUUUUCUUCUUUG  
>N4591  
AAAACCCUCAAUUCCUCUAAACUUAGCACUUGGUUUAAGA  
>N4592  
UAACAAUUUCCUCCUGAGGACUCCAGGGGAGUUUGGGAGC  
>N4593  
GUCUCCUUCACAUUGAAGAAACUGAGGCAUAGAAUGACUGG  
>N4594  
UUGCAAUAUUUAUACUGGAGACUUCUGGAGUGACAGCACUC  
>N4595  
UCUGAAGCUUUUAAUAUGGAAACUGAAGGUUUUCCUCCAAAU  
>N4596  
UGAAGAAAUUGAACACAGAAACUUUUGAAUCCAAACAAGCA  
>N4597  
AGGUUUCUAAUUGGCCUGGAACUCACCAGGCUGGGUUAGCU  
>N4598  
UCCACAGUAGGUCAGCACAAACUACUAAUGUGGUGUCCUG  
>N4599  
AUCACAGCAACAGAAAUGAAACUAGGACCAGUUUUUAAAGC  
>N4600  
AUCGAUAAACCUCAUGUCAAAACUACAUAUGUCUCAAAGUC  
>N4601  
AAAAAAAAUCGGUCUACAGAACUGGGCACUGUAGGUUCUA  
>N4602  
GAAAUACAGGAACACUGAAACUCAGGGACCCUCUAGAUUA  
>N4603  
CCCAUCACAUAAUAAUCAAAACUCCAAAUGCACUAAACAAA  
>N4604  
UUAAUAUCUCUAAUAUGAAACUUAUAUUACCAACAUAUC  
>N4605  
UUUAAUUCAUUAGUAUGAGAACUGUCUGAUUUUUUAUGAGG  
>N4606  
UCUUUGAGUUACUCUCUCAAACUGUGCCUUCAAACAAGCCC  
>N4607  
UGUAUGGAGGUUAGAAGAGAACUUGCCAGAGUUGGUUCUCU  
>N4608  
GUGGCUGCAUAAAUUACAGAACUGCAUUCUGGAAUCUGAGG  
>N4609  
AGCAGAGCUGAAAGAAAGGAACUAGACGGUCAGAAGAACAG  
>N4610  
CUGCAAUAGUCCUUAUGUAGACUAAGGUGC AAAUAUUAUG  
>N4611  
CAAAAAGCAAACUCUGGAAGACUGGGAAGAGUUACAUUGUU  
>N4612  
CACCAGAAAUCUUAGCUAAACUGAACUUUUCGUUACUUGA  
>N4613  
CUAAUAAAAGAAUAGGAGGAACUCCAGCCCCUAAAACAAU

>N4614  
ACUAAUAUAAUAAACUUCAGACUUCUAACUCAGUGACAUAU  
>N4615  
AGCAUCCUGGAGUUGGACAAACUCUGCUCCUGAAUAUGCUG  
>N4616  
AGUACAGAUAGAGAAAAAGGACUCAAUUUUCUUUAAGGGGU  
>N4617  
CAGGAUGUGCAUCUGGGAGAACUGAGAAGUGAGUGUGAUGG  
>N4618  
GCACCAAUAAGCCCAUAAGGACUGGCACCAUUAGGAGGUGU  
>N4619  
AAAGAGCAUAGACCAGUUAAACUACUCAAGUUAGUCUGCU  
>N4620  
UAUAGUACUCUAUCUGCCAGACUACUAGAUUAUUGUGAAUA  
>N4621  
CUCAGCAUCAAAAAGGAAAGAACUUAUCAAAACCACAAGAAA  
>N4622  
AGCAAAA AUGAAAUAUGAAACUAUUUCAUUUAUGACUUUC  
>N4623  
UCUCUUGUUUUUUAAACAGACUCUCUUCAUUUUGGAAUAAUU  
>N4624  
UCAUUUACUCUGUUGUAUGAACUCGUUGCUGGGGUAACCU  
>N4625  
AUGAACGUGAGGCCAGUCAGACUCCACUCCUGCUGCACAU  
>N4626  
GCCAACACUGAGUUCCAGACUUAGUGCCAGCAUACCCAA  
>N4627  
AUCACAAAGGAUGACCCUGAACUUCUGAUCCUCCUGCCUAU  
>N4628  
GAUUACAUAGUAGGUUUGAGACUAGUACGGGCUACUUUAAA  
>N4629  
UUUAUUCAUAAUAGCCAGAAACUUGAAACAGAUUAAGAAA  
>N4630  
GCAAACCUAGUACAGUGGAAACUUCUGAAUCUAUGAAGGU  
>N4631  
ACUAAUCAGGGUUCACAGGGACUCAUAGACACUGAAGCAGC  
>N4632  
CAGAGCUCCAGCUGCAAAGACUGAGUGUCUGUGACAAGGA  
>N4633  
ACAUGGGUUCUGGGGAUGGAACUCAGAUCUCCAGGCUUGCA  
>N4634  
CAAGAUAAUGUAAGCUUAGGACUUAAGCAUGAUUCAUUGCU  
>N4635  
GUAUCCAGACUGACCUCAAACUUUUACAUAGCCCUGGAUG  
>N4636  
AUGUCUUCCUGCCCCAAGAACUAUUCUUGAAACUCAUUA  
>N4637  
GCUCAUGAUACUGUAUCUAGACUUCAGGCCUCCAUUCACAC

>N4638  
CUUGGAAAAAGAAAAAAAAAACAUAACUAAAAAUUUUAAA  
>N4639  
CCACACAGCUGGAGAGAGGAACUGAGGAACUGGAGAAUUUG  
>N4640  
AAACACAAACCAGCAGAAAAACUGUCCCUAGAACAAUAUGA  
>N4641  
GCCACUUGGUGAUGGAGAGAACUGACUCCCCAAGCUGCCC  
>N4642  
AUUAUAGAUAGCACAGGUUGGACUUGAGUUGUUUAUUUUUU  
>N4643  
AGUAACCACCCUGACUUCAAACUCUGGAUCCUAGAUUGUGC  
>N4644  
GCCAUUCUCUUAAGUAACAAACUCCAGGUCAACCUGGACUA  
>N4645  
UGCACUUUUACAUUUUUAGGACUUUGUGCUIAAUACAGAAU  
>N4646  
UGCUIAAAAAUAGCAGUAAACUCUUCUUUUUUUGUUUUUU  
>N4647  
GUUGCAGGAUUUCUAGAGAACUUCAUGGCAGCUAGUCAUA  
>N4648  
UAAAAGUGCUUGCCACUAAAACUGAUGACUGGCAUUCAAGU  
>N4649  
CUCCAACCUCAAAAUUAUAGACUCUGGGAACAGAAUACUGC  
>N4650  
ACUUGGGCUGCCCAUCAUGGACUAUGUGACAUUUAAUGUCC  
>N4651  
UCAUCACAGUCACCACAGAAACUAUUAGAUAUCCUCUAGGA  
>N4652  
UUUUGUCAAGUUGACAUAAAACUAACCAGUACAAUAUGAAU  
>N4653  
UAGCUGAAUUGGCUAGAAAGACUGGCUGGACUAGUGAGCAC  
>N4654  
UAGCUCAGGCUAUGUCUCAAACUUGCUIUGUCAGUGAGGCU  
>N4655  
UUUUGUCCCCUAUAACAGAGACUUUCCUUUUGACCUAACAU  
>N4656  
CAGUCUAUAGACUCUGCCAGACUGCUUAGGUCAUGUCUUGC  
>N4657  
AUGGUAGGACUUGAGAGAAGACUGACAUUGGAUGUUAGAAG  
>N4658  
GCUGAGGAGGCCAGGAUCAACUUUAAAGUGUGUGUGUGUG  
>N4659  
AAGAGACAUUCCCAUUCAAACUGCAAUAGCUCUUCACUGA  
>N4660  
GAAGUUACAGACUGUAAUGAACUGCUCCAUAUGGGUGCUGG  
>N4661  
AAGACAGGCAAUUGCUUUAACUACUGAGCUGUCUCUUGGA

>N4662  
ACUUUAAAAAAGGAGAUUGGACUCUUAAAUGUACACAUACA  
>N4663  
CGAGAAAAGCUGUACACCAGACUCUGAGACCAGACCAGCUG  
>N4664  
UGACAUUAAUUGGGCAGCCAAACUGUACUUCAGAAACCGCCU  
>N4665  
GCUUGCUCUUGAAGAGUUAGACUAUAUUGUCAACAUCUCCU  
>N4666  
AUGUUGGAAUGAGAGAAAGGACUUGGUGAAGCUGUCCUCUG  
>N4667  
CCACUGGCUACCCAGCACAGACUUGCUCUUGUUGAUCAAAG  
>N4668  
UCAUUGUUUAAUCCUUGAGGACUUUUUAUCAGGACAGGAUU  
>N4669  
CAGGUAUUUUGAAAUGUGGAACUUCAUAUUUAUAGUUUAGAU  
>N4670  
UGUACAACUGUCCAGUAAAACUGCCUCCUCCUAGGACUG  
>N4671  
GGGUCCAUUUGUGGAGGGAGACUGUAGAAUGGAAGAAGGGG  
>N4672  
CUGUAGAAUGGAAGAAGGGGACUGACUAAAUUGCAUCCCC  
>N4673  
GAAGGCUUUGGAUCCCUAGAACUGGAGCUUCAAUAGUUGU  
>N4674  
AAGUCAUGAUGAAAGUCAAGACUCAGCUGUCCUCACCUGCC  
>N4675  
UAUUUAUAGAGCUGGGGUGAACUGCAGCUAUGUCUAUCUUA  
>N4676  
CUGCUUUUUACUGAAGAUGAACUUGCUCUUGAUGCCAUAGA  
>N4677  
UUGGCUUCGGUUCAGCUGAGACUGGUAGAAGACCCAGUAGU  
>N4678  
UUGCCGUUAGAUGCUUGGAACUGAACCCUAGUCCUCUAUA  
>N4679  
AAACUUUGGAGAAAGGUAGGACUAAGCUGCAGAAAUGGCUG  
>N4680  
GAAUCAUGCAGUCUUUUAAAACUUGGUAACUGUUAUGGAA  
>N4681  
UUAGAGAAACAACAACAAAAACUUUAGAUGAGUUUUACGU  
>N4682  
CAUAUUUCUGCCAAUUAAGACUAGAAGGGCACAACUUUUU  
>N4683  
UUUAGCUGAGAUCUCUAGGGACUUUGGUAUCCUUUCUCCAG  
>N4684  
CUGCCUUGAUAAUGGACUGAACUUCUCUGCACCUGUAAUCC  
>N4685  
AACCAGCUGAAAUUAUGUGGACUUUUGCAACCUCAAAGCCC

>N4686  
CACUUGGGUCCAUUCACAAGACUGGGAGUGGUUAUAAAAAAG  
>N4687  
UUUAUUUGUGAUAGUCAUAAAACUGGAAACAAUCUAGAUGUU  
>N4688  
CUUUUAUUUUUUGAGAUAGGACUUUACACUGUAGCCCGGAC  
>N4689  
AAAAGUGAUGAUCUAGAAGAACUUUCCCCCAGUUUGUCUUU  
>N4690  
UGGUUAGUUUCUAGUUUCAGACUAGUAUGAGGUAUGCUACU  
>N4691  
UAUAUUUUUUUAUUAUGCAAAAACUGAAACUCUUUGCUCAUUA  
>N4692  
UUGCCCUGAAAAGUUCAAAAACUGAUCUCUUUGGCUGGGCA  
>N4693  
UCAGAGUUUACAUAUUUUAAAACUCCACAUAUAAGUGAGGCC  
>N4694  
UGGUAUCCUGACAAUUGGAGACUGAAAAUGCCCCACUUCUU  
>N4695  
UCUAUCAGCAGACCUGGGAGACUAGCUCUAUCCUUAGUUUC  
>N4696  
AAAAAGAGUUGCAAUAAAAAACUAAACCUGAUACCAAUUC  
>N4697  
UGGUUUAACUGGAACAUGAGACUGCAACUCACAAAUCUUG  
>N4698  
AAUCCUCAGUGUUGCAUGAAACUGGAUUAGUGGAGUAUACA  
>N4699  
CACGAGUCUAAUAAAUUUAGACUAAUCAAGAACUCCAAUU  
>N4700  
AUCAGUUUUUUUGCCCCAAAACUAAGAGGCUGCAGACUCCC  
>N4701  
GGGUUACUCCUGGGAGGCAAACUGGGACUAAAAGACAGAA  
>N4702  
CUGGGACUAAAAGACAGAAACUAGGUGGUCGAGAGAAUA  
>N4703  
CGUGCAAGCACAUAGACUGAACUCUGAAUCCCUGCAGCCAG  
>N4704  
AGGCAGAGAGUGAUAGAGAAACUUACCAACACCCGCUUUUA  
>N4705  
CAGGGGUCUUCCUGUCUUGGACUAGCCAGCACACCUCUUU  
>N4706  
CCCUUUGUCUUAGCUCCAAACUUUGUCUCUGAAACUCCU  
>N4707  
UUCUUUGUUGAGGGAAGAGAACUGCAGAGAAACCUCACAGA  
>N4708  
ACUAACCAGUACCCCCCGGAACUCGUGUCUCUAGCUGCAUA  
>N4709  
GAUAAGGAUGGAUACUGCAAACUACUCAAGGAAAAAUCUA



>N4710  
ACAUCCUCCAAUAAUACCAAACUUCCUAAUAGUGCCACUCC  
>N4711  
CAUGAGCCAACCAUAAUCAAACUACCACAUCCUCCAUGGGA  
>N4712  
CUCCUCUUGAUUUUAAUCAAACUGCCUUUCAUUUCUUUCCC  
>N4713  
AUCAGGGUCCUUUCCACAAAACUUUGCUGGCAUAUGCAAUA  
>N4714  
UUGUCAUAAUGACUGUCAAAAACUGAGGUGUGAUACACAAUU  
>N4715  
AUGUGUGCCCUGAAGAUUAAAACUCAGGCAUUAAGGCUUGGC  
>N4716  
GCUGGCAUGGACCGGCAGGGACUUGUGACCCUUGUCAGGCC  
>N4717  
GGUUUGUUGGGGUGCCCAGGACUGGCUGAGGUGGGCGUGCU  
>N4718  
GGAGGUGAGUCCUUUUGAAAACUCUAUGCCUCGGGAGUGCU  
>N4719  
GUGAGAGGGUGCGCCAGAGAACUGGACAGCUUCUGGGACAG  
>N4720  
GGUUGAGGACAUCAAGACGGACUUUAAUAAAUCACUAAAAG  
>N4721  
ACGGGAAACCAGCUGGGUAAAACUCCAAACUCUGCAUCUCCA  
>N4722  
AAAGCGAGCAAGCUAAUGAAAACUUGACUUUAAAAAUUUGUC  
>N4723  
CAUCUCCUUAAUAAAGAGGAAAACUUGUCCACAGAGGUAGA  
>N4724  
GAUUUGUCACACAUUGGCAGACUUAUAUUCUGAAUCUAAUC  
>N4725  
UCCUUUCACUUUCAUUGAGGACUGGGAUUAUAGGUCCAUGC  
>N4726  
UUGUUGACAAAUAGUGUUGGACUGACUUCUCUAUUUUGAGC  
>N4727  
UCAGCUAUUAAGAAGAAUGAACUUAUGAAAGUCCUAAGCAA  
>N4728  
CUGUGGGUAGUUGUUUAUGGACUGUUUACUGGUUUAGUAAA  
>N4729  
CACAAAGUUUUGCUAAAUAGACUGCUCAAAUGUGAGCUGAA  
>N4730  
UGGUGAGAACAGAUGGCGGGACUUGGUCUCUCCCAUUUUUU  
>N4731  
CAGGCCAUAGGUUCACAUGGACUAAUAAAGAUGUGUUUUUA  
>N4732  
UGACAAAUGGGACCUCAUAGACUUGCAAAGCUUCUGAAAGG  
>N4733  
AGUACCUCUGAGCUCCUGGAACUAUACCACCAAUCAAGAA

>N4734  
UCUGCAUCACCAAAGUUCAAACUCAGAGUCUGUAUUAAGCU  
>N4735  
GGUUGGGCACUUUCCCCAGGACUUUUCAGGGCAGGAGGUAG  
>N4736  
UUACACUUAUUGGUUAUAAAGACUUUUUAGUCUCCUUUAUUA  
>N4737  
CUAUGAGUUUUCCCCUAGGACUGCUUUCAUUGUGUCCCAU  
>N4738  
UCACAUUAAAUGAUAAUAAACUUACUUUGUAAUCAUUUAA  
>N4739  
ACUUUUGUUUUGAGAUGAGACUGUGUGCUAGAUCCAUUUU  
>N4740  
UCGGCCUACCUGUCCCGGAGACUAUAUGUGGUCACCUGAAG  
>N4741  
UCUCCUCCCAUUGAUAAACAGACUAGGCCAUUCUCUGGUUAUA  
>N4742  
GGUGGUGAGUUUAACAAUAGACUAGCAUUGCAUCAGCGCAU  
>N4743  
CCAAAGUAUCCACGACAAAACUAAAUUCACCCAUUAUCUC  
>N4744  
CUGCCUAAGACCUCUACAAGACUGGAUGCUGUAACAUUUUU  
>N4745  
UCUUUCAAGGUCUUUAAAAAACUGUGUUGGAAUUUUGAUGG  
>N4746  
CCCAGCGGAAGCUUUUAAGGACUCCAGAGUGCUCUCCAUGC  
>N4747  
GAAAGUCAUCCUUUAACAAAACUAGAAGAAGACAGUCACAA  
>N4748  
UUUAAAAAAUUAAAGGAUAAACUAUAUAGAGGAAUAUAUU  
>N4749  
GUUCUUUUAUCCUUGAGAAGACUUUUUGCUAUCCUAGGUUU  
>N4750  
AUAGAUUCUCAUGCAGAUAGACUAAAACAUUCCAAAGGUUAU  
>N4751  
UGUUUUUGAGAUUGAUAAAGACUAAAACUACCGGUAACCAU  
>N4752  
CCACAGGCUCAUGUACUUGAACUCUUAGUACCCAGUUGUUG  
>N4753  
GGUGUGUUGGGAUGCCCUGGACUGGGCCAGUGGGAGUGCU  
>N4754  
UGGGAGGUGAUACUCUCAGAACUGAAAGAGAGGGACCUUAG  
>N4755  
AUACUUAUUCGCCAUGAUAGACUCUAAUCCAUCUUAACUG  
>N4756  
AAACUUAGUAAGUUCAUGGAACUAAUCAACUGUUUCAACA  
>N4757  
UUGUCAUCCUGGAAGAGAAAACUGGUUGAUGUUCUUCAUGC

>N4758  
GUCUACUCAAUUACUUUUAGACUGUAUAAGGAUGAGAUGAU  
>N4759  
CUGACUGCUGAAAGUUCUGAACUCGGCGGGGGAGUCGGUUC  
>N4760  
UCUCUGAAGGAACACUGUAGACUCAGAUAGUGUGCAAACC  
>N4761  
GGGCUUCCAGUUGUACAUAAGACUAAGUUUGAAGCUAAUACU  
>N4762  
UCCAUCCAUUUGUCUGCAAAACUUAGGGUGUCCUCAUUCUU  
>N4763  
UUUCUUAGCUCAAAGGUCAGACUUUGGAUCUAAUCAUUUCC  
>N4764  
ACAUACUUUUGUAUGAUUGAACUGACUUUGACUUACAUAU  
>N4765  
GUUUUCAAUUUUAAACUGAACUGAGGUCACACUGAGCAUU  
>N4766  
UUUCCUGUAUAGAAUGAGAGACUGAGUAUAAAACAGACUUG  
>N4767  
GAAGCAGCAGAGCAGCCAGGACUCCGUACUACAGGCCUAUA  
>N4768  
UUCAUCUGGAAUAACAAAAACUUAGGAUAGCAAAACUCU  
>N4769  
GCUAGGGAGAAUAAACAGAACUCCUGAGGCUCAUUGGCCA  
>N4770  
UUUUGAUCUUAGCCAUUCGGACUGGUGUGAGAUGGAAUCUC  
>N4771  
AAGUUUUUAAUCUGCAAUGAACUACUCCCAGGAAUGAAGU  
>N4772  
CUCUGUGAUACUUUGGAUAGACUGCUAUAACUCUUUUCUAU  
>N4773  
GGAGGUGGAGGUUAUAGGGGACUUUCAGGAUAGCAUUUGAA  
>N4774  
GAGUGUAACAUGUAACAGGAACUGUGAGCUGAAUAAACCU  
>N4775  
UACUUGCCUUUAAAUGCUGAACUUCAGAUUUUAUUCUGUGGG  
>N4776  
ACAAAAACAAAAACAAAAACUUCAGCUCUUACUACAAAA  
>N4777  
CUAAUCCACCAUACAAUAAACUCAAGAAAAAAGAUCAC  
>N4778  
UAUUCAACUUGUUUCUUGAAACUGUUGCAGAAUGAAUAAA  
>N4779  
CUGUUGCAGAAUGAAUAAAACUGGAGAUUAAGGAUUAGAC  
>N4780  
AUUUUUGAAUUCAUGUUAAAACUUAUGAGCCUGCUUCAA  
>N4781  
AUUCCUAGGCAAUUGGUUGGACUUGGAGGGCAUUAUCCUGA

>N4782  
UUGAGGUCAUACAUGC UAAAACUAUGCCAGUGUGUCACACU  
>N4783  
AGGAUCUGUUCAUUGAUGAGACUGGGUGUGUUGAAGUCUCCC  
>N4784  
UGGCUUGGGUAUUCUGAAAAACUACUGGGUCACUGGGAAUA  
>N4785  
CUGAGAGGGGCGCUGAGAAAACUGUAAGCUUCCUGAUCUUC  
>N4786  
AGGGGUUGAGAAGUAUCCAGACUAGCACAGAAAGUAAUGGC  
>N4787  
GGGUGUUUGUGUACACACAGACUGUUUUUAUGUAAUUGAAA  
>N4788  
CCAGAAAUACUAAAGUGAAAACUUUGCAUUACUGGCACUAU  
>N4789  
AAUAAUAAUGGUGUAAAAGACUGUAGAAACUUGAACAAAU  
>N4790  
UGUUUGUAUGUUUCCUGAAACUCUAAGUGAGGUGUUGAUU  
>N4791  
AUAAUAAACCAUGUGUUGUGAACUUCUGAGUCUUGUCUAAUU  
>N4792  
CUAUCUAGUUC CAGCUGAGAACUGUUGAU AUGGGAGUUACU  
>N4793  
GCCUUUUCAUCUGAUUCAGAACUAUUAAGAACUGGCUCUU  
>N4794  
AUACAUUAAGAAUUC AAGAAACUUGAUAUCAAGAGAACAAG  
>N4795  
UCUAUGUUUGCCAUGCUCAGACUUGUUAGGAAGCCUUUCAC  
>N4796  
GGGUUUUGCCAUCUGCUGAGACUCGCAUAGCCUCCAGUUUG  
>N4797  
CAACUUUGUAGGU AUGUUGAACUUUUGUCAUGAACUGACUU  
>N4798  
UUCAUAUUGUAAUUCUUGGGACUUUGACUUCAUUUCCUCC  
>N4799  
AAGAAAUAUAAAUCUACUAAACUGUAAUCAAAUAAAAAUGC  
>N4800  
UGUUUGCAGAUUCUUGAAGGGACUAUUCGAAGAGAAAUAUCU  
>N4801  
GUAGGUUACAUACUUAGAGGACUACAAGGCCUACAGUAGUA  
>N4802  
UAAGGGGAUUUGUGUUCAGGACUCAUAGUUAACAUUUUGU  
>N4803  
CUGGGAAAAACUGCCUCCGAACUCCAUGAACAGAACUUCAC  
>N4804  
CCAAUUAAGCUGAAGAGAAAACUGGGAGUUCUAUUUUGUUC  
>N4805  
AGAGUGCUCUGAGCACUGAAACUCAGAGGAGAGAAUCUGUC

>N4806  
AGGUUUUAUGGAUUUUGAGGACUUUGGCAGAAGGUAGAAAA  
>N4807  
CCCCUCCCGACAAAACAUGGACUGAGGACUCUACUACUGA  
>N4808  
AAACACAAAGACUGGCAGGAACUGGGCAAUAAAACAACUGA  
>N4809  
CUAGCUCCCCUCCUAUGGGACUACUUUCUCAGCCCUGAUU  
>N4810  
UAAUCUGCAUGUGGCUUCGAAACUUUCUCCAGUUUAUAGUGA  
>N4811  
GACUGUGGAAGGACUUUGGAAACUUUGGGCUAAAAGAUCCAU  
>N4812  
UCCAGGGAAACCUGCCAAGACUGGCAAGCUAUUAUUUUUA  
>N4813  
CAUAUUUCAGAGCACAUUGAACUGGAUAGCAUUGCUGAGAA  
>N4814  
AAUGUAAAUCAACCAAUGAACUGCUAUGUUGC UAAA UUA  
>N4815  
GCAGCAGGCGCUGUUGGCAAACUUGC UAAGCAACGCAAGUU  
>N4816  
UUUCUGUAGGCAGUGCUGAGACUUUGGCUGCCCACAUGUCC  
>N4817  
AAGAAACAAAAGAAAACAAACUACAAUAACAAAAAAACAA  
>N4818  
ACUCAUUGGAGCAUGGUCAAACUCCUGGGGGCCAGCCUCUU  
>N4819  
AGAAAGCUCUGGAAACCCAAACUCACCAGAAAUGCAAGACU  
>N4820  
AUCUCAGAU AAGUUUAUAAACUUGGUUAUAACA UUUUUUCA  
>N4821  
AUUUUCUGUUCUUGAAUCAACUACUUUAUGUCAAGAGAA  
>N4822  
CCUACCUAGUGACAAGAAGGACUAUGUGUGGAAGAUCUCCA  
>N4823  
UAGUCCUGCAAGUAGCAGAACUUGGCAGCUUCAGCCUUGU  
>N4824  
AUUGAUACUGGUUACCUGGAACUAGGAAAUUAACAGUGAUU  
>N4825  
ACACAUUAUCUGACUAAAGACUUCCAAGAUAAACAGAUGC  
>N4826  
GGUCCCUUUAGGAGGCAGGAACUGUAGUGUUUAAGUGAAUA  
>N4827  
AAGUCUGUUCAUUGAAGAGACUACAAUGAUACAGUAUAUU  
>N4828  
AACACUCCCAAGAUACUAAACUGGAGUAAUUUCAUAAAUC  
>N4829  
UUCUUAGGCAAUGGAUGGAACUAGGAAAUUAUCAUCCUGAG

>N4830  
UAAAAAUACCUUAUCAAGAACUGUCAGGCCUGGAUGAAAC  
>N4831  
AGUUAUAAGGGGAUGUAUAAACUAUGUGUAUAUAACAUAGU  
>N4832  
UAGUUAAGGCUACACGUGGGACUUGAUCUUUGAGAAUAGA  
>N4833  
UAAAACACUCUCUCAAGGACUAAAUGCAUAGAUGGUAGA  
>N4834  
AUACUUCUUUAAAGGAAAAACUUAUGUGGAAGAAGCCUAU  
>N4835  
CACUCACCAGCAGCAUCAAGACUUUGAGCCUCAUUCUUAU  
>N4836  
CCAUGAAGUAAGACCAACAAACUCAGUGCUGCUGCUUCAU  
>N4837  
UGUUUGAUGCUGCUAUUGAACUGAAUUGCUGGUAUCCUGA  
>N4838  
GACACUAACCAUAUUGAUAGACUUUAGAUACAAAUGGUAGA  
>N4839  
ACGUUUUAUAAUUUUGCAAACUUACACCUUUUAUACCAUUU  
>N4840  
AGAGAGAAGCAAUGCCUGGAACUGGGAACCUAGUCAACUAC  
>N4841  
AUCCCACACAGACUCAGGGAACUGAUCACUUUUAACACA  
>N4842  
AGGAUGCUGGGCAGCAAUAGACUAAGAUUCUUUCCGUUAC  
>N4843  
AUUGAUUUCAAAAUGUAAAAACUACAUUUUUAUAAUUUAGU  
>N4844  
AUACAAAAUAUCUUUAGGAACUUAUUUUGUAGAUUUCUUG  
>N4845  
AAUUUCCUACCUUCUGGUGAACUUACUGGUGAAAUGUAUUA  
>N4846  
AUUCUCCUCUGAAGAAACAGACUGGGAGGAAGAAGCAGCUC  
>N4847  
UUAUUCUGCUGAUCAGACAAACUACCAUUGGGGAGCUUAUG  
>N4848  
UUAUAAAACAGAAGAGGGGAACUUUUGAAGAGACUGUACCC  
>N4849  
UUUUUUACCACUAACUGGGAACUGGGUUUGGCCUUAUUCA  
>N4850  
CAGAUCCUUCGGGAAUUGAGACUUCAGGUCAACUCCACGCG  
>N4851  
ACACAAGUUUCAACCGGAGACUGGGUCUACAUGAGGAGGU  
>N4852  
UGUGGCCUGACACCCAACAGACUUUAAAGCAUUCAUACCCA  
>N4853  
UCCUGAUAAACCCACAAAAGACUCUCCUUAUCCCCUAGAA

>N4854  
AAAUUUUUUUUCCAGAAACUAAGGUCUUUGAUUUUGU  
>N4855  
UGUGAAACAGGUGCCUCUAGACUCAGUGAGUAGAAAACAAC  
>N4856  
UAUAAACACAGACCUCUCAAACUAGUGUUUCAUGGAUGGUU  
>N4857  
UGAAGGUAUCAGUAGCAAAAACUUACUAUUCUAAGUGGGC  
>N4858  
UCUUCAUGACACAAUGAAGAACUGUGCUAUGGUUUUAAGCA  
>N4859  
ACCUCUAUGAGACAGAAAAGACUGUGCAGGAAAGGAAAAAG  
>N4860  
ACACUACAGACUUUGAUUAAAACUACCUAUUAAAACAAGAAA  
>N4861  
AGAAGAAAACCCCUUCAAACUGAUUUGUUUAUUUCAGU  
>N4862  
AUUUUCAAUCUGUCAUAGAACUAGGUGCUAGUUUACAUI  
>N4863  
UUUGACUCGCCCCAGUUGAAACUGCAACAUGGCUAAAGGUA  
>N4864  
CUGUGUCAAGUUGACACAAAACUAGCCAGUACAGGGGAUAA  
>N4865  
UGGUUGAGAAUUGGGCUAGGACUAAGCUGGAAUUAACAUI  
>N4866  
UACUUGAAAUGUAAUCUAAAACUCUAAUCUGCAGAUUUUAU  
>N4867  
GCACUGAUGGAUGAUGAAGAACUCUGAGGAAGAUCUUCCA  
>N4868  
UCCAGUAUCUUUAUAACUGAACUCAUUUUAGCAUGUGUGUG  
>N4869  
GCAUCAAAUCUGCAGACAAAACUUCAUAGCUUUUCCUACC  
>N4870  
GAGACACGAGCUCUGGAGGACUGGUUAGUUCAUAUUGGUG  
>N4871  
AAGUUGCUAUGGUUAAGAAAACUUGAUGUACCCUGGGUUGA  
>N4872  
UAAUGGCUGGUGCUCUGAAAACUGGAUUAAAAACUCUAUGC  
>N4873  
UGAGAAAGUAUUGUUAUUGAACUGGAUGUAAACGGAGUUUG  
>N4874  
AGGUGGUCUUGCCCUUGGAGACUUUCUGACUCAUAGUCCA  
>N4875  
GACAUUAUUGGAAACAGAAACUAAACAGAGACACAUGGAA  
>N4876  
CUAAACAGAGACACAUGGAAACUAACAUAAGUUAUGAAACA  
>N4877  
UGUUGAGAGAUAGAUUUAGACUAGAAAGGAUGGCUUCCUG

>N4878  
CAAGCAGCUUCUCAUGAGAAACUUCUCCCCUUUUUAACUGG  
>N4879  
ACCUCUUGGGGACCCGCCGAAACUUAAGGAAAUUAGUCUGAAC  
>N4880  
AAAACCCGAGGAUAGCAAAAACUCUUCUCAAGGAUAAAAGA  
>N4881  
UGGAGGUGACCCUAGACUAGACUUCUAGCAGCAGGGGAUUAU  
>N4882  
CAUAAACAUUUAAAAUAAGACUCUGGUUCUGGCUCAUAGA  
>N4883  
CCAUGUCAGAUAGUCAUUAAACUAAUUUAUACUCAGUAAACA  
>N4884  
GUCAGAACUUAAUAUCAUGGACUUAUAGUUCUGCAGUUAUAA  
>N4885  
CGAGAUCUCUCAGAGACUAGACUGUAUAGGUUGGGAGUGCU  
>N4886  
UCAAGGCAGUUUAUUCAGGAACUUAACAAUGUGCAGGAAAA  
>N4887  
AAAAGAAGGAGAAGAUAAAAACUAAGGACUCAUUUAAAAAA  
>N4888  
AGAACAUAACCAGCUACCAGAACUCCAGUGAGGUAGCCCAGC  
>N4889  
CUUAUCAGGUAUUAAUAAAAACUAUAAACUUACACCUGUAG  
>N4890  
UCAGCUAUGUAGAGAAUAAAACUGAAUGGGCUUUUUGGUA  
>N4891  
UUUCAAGUCUUCUCUCAAACUUCACAACCCAGUCUCUAC  
>N4892  
GUGCCACAUUCUUAAGAAAACUGCUCCCUUUACUAGAUCA  
>N4893  
CCUGAAGUAGGCUGAUCCAGACUUUGACCUUGGCUGCCACU  
>N4894  
ACUAUAAUGAUUGAAUGGAACUGGAAAUCAUGUCAAAAAU  
>N4895  
ACAAUACAUGUUUAAAAGGACUGUUGACUUGUACUCACUG  
>N4896  
AUGAGGCUCUGGUGAACAGGACUUGCCCUGAUGCUGAUAAU  
>N4897  
CUUUCAGAUGUUAAAGAUGGACUUUGGUAACCUGUGAAUU  
>N4898  
GCAAAGUGUCCACACUUUGGACUUCAUUCUUCUUGAGUUUC  
>N4899  
UGGCUCAUGUUGAUAGAAGAACUGAGACUUCAAAUCCAGUA  
>N4900  
CUCCACUGCUGGAAUUGCAAACUGGUCCAACCACUCUGGAA  
>N4901  
GCAUGUAGGGAAUUAUCUAGACUCAGUUAUCAAGAUGUGA



>N4902  
CCUUCAAUGAAUGCCACAAGACUCUUAGAAUAUCCUUAUCC  
>N4903  
AAACCAACUUGACUGAAGAAACUCUAAAAGCAAUUGCACUA  
>N4904  
CCUAGAUAAACAAGUGAAAGACUAAUAUGAUACAAAUAACA  
>N4905  
CCCAGGGACAAAAGAGGCAGACUCCAGACAGUCACCCAGAC  
>N4906  
GAAAUAUUUUUUAAAGUAAACUUA AAAAGGAGAAGACAAG  
>N4907  
GACAUAACAGGGCUAUCUGAACUGAGUCAACAACUCACAGA  
>N4908  
AACAU CAGAAGAAUGUGAGAACUCGGGGGCAGACCCAGCAU  
>N4909  
AAUCCAUCUGCUUUUGGAGGACUCCUGGGGAAAACAGCUCC  
>N4910  
AUUUAAAAAGUACCUGAGGACUGUGGAGAUGGACUAGUAG  
>N4911  
AACACAACAUUCUCAACACAGACUCCAAAAGAUAGAAGGAUC  
>N4912  
UCUGGGUCCUUUCAGCAAAAACUUGCUGUAGUGUAUGCAAUGG  
>N4913  
CCUCCUCUGUCACAAGGAGAACUGACAUGACCCCAUUGGC  
>N4914  
GAUUCUUUCCCUAAUUGAACUACCUGGUUACACCUCCA  
>N4915  
AGAGGUACAGAGGAUGAGGAACUUACCAACAUUUUAAUCAA  
>N4916  
UAACGCAUACUUAGCACUAGACUUCUGUUUGGAAUCUGGGA  
>N4917  
AGUUACUACAAAACAAAAGACUCCUAAA AUUCUAAUUUU  
>N4918  
ACAUUUAAUUGUAAGCUGAACUUUACCCUUUCACAUUCAC  
>N4919  
AAGCAGGCGAAGGAGCAAGAACUAGAGCUAGACUCCCUUCU  
>N4920  
UGUCAUAAUGUACAAGGAAAACUGCUUGUUCAUCAUGUUGU  
>N4921  
AGACAGAAGUAAAUGAAAGAACUAUGUGCUUUUAUAAUACUA  
>N4922  
ACCAUCCCAUCACUUGCAGACUACACAAAUCCUACCUCCU  
>N4923  
GAUGC AUUCUGGCAUUGAAACUUGGAUGAGCAUGAAUUUU  
>N4924  
CAACAUAUUUUAAAGCUAAAACUCCA UUUUAUUAUAGUAGGU  
>N4925  
CCACUGUGGUUAUCUUUAGAACUGUUUAUACUAUGAGCCA  
UU

>N4926  
UUGUGGCCUGUGUUGGGGAAACUGGUUGGGAGUCAUCUGGU  
>N4927  
CCGGGUAACAGUUUUAUGAACUGACCCAGAGUAUAAAGAG  
>N4928  
CUAUGUGGUGACUAAGGAAAACUCAUCCAUUGUGCUAGGCA  
>N4929  
UUCACCCUUUUAUGAUUGAACUAAUGAUGAACAUUCAGCA  
>N4930  
AUAAAAGAGAAGAACCCCAAACUUCUGCCAGGACUCUUCA  
>N4931  
ACUGUACAAGCUCAGGGCAAACUUCAUUUAAAAGGAAACU  
>N4932  
UGAGUAAGAGGAUUAAGCAAACUGGACUUAUUUGAAUAUCC  
>N4933  
CCAGGAUCUAAAUCCAAGGACUGUAUGAGUAAUUAACAA  
>N4934  
UCUGAAACCUCUUGACCUGGACUUUCAUAAUCUACAUUGCU  
>N4935  
AAUAUUACUUUGUCUACAGAACUUUGUCCAGGUCACCCGGU  
>N4936  
CCAUAUUUUUCAGUGUAGAAACUAGAAUGUAGCAUGGGGAU  
>N4937  
GAGAACAGAAGAAAAAGCAGACUAAGUCCAAGGAACUUUC  
>N4938  
UUUAAAUUCACUGAAUAAGAACUCUAAUUACAUCUUGGUA  
>N4939  
UAUAUUUAUUGAGAACAAAACUCAUGUAACUGUCCAAUGA  
>N4940  
AUUCCCUGAACUUCAAAUAGACUUGUACAACAUCAGUACAU  
>N4941  
CAAUAGCUAAGAAAUCAAAACUGAAAUAUACAAUUUUGA  
>N4942  
UAUGUAAAGGCAAUAAGGGACUGGAGAGUUUAUAAACACA  
>N4943  
UAAGAAUGCUGGAAAUUUAACUGCUUUGGAUGUACUUCUU  
>N4944  
CACUCCUGAGAUGACCCAAGACUGUCAGAUGGCUCAGGCAC  
>N4945  
CUGCUAUCAUUGGCAGUAAGACUUAUAGAAUUUCUAUUUUU  
>N4946  
AUGGAAUAAAAGAAGAAAGACUUGGUAAAUUUACCCUAU  
>N4947  
GCCAGCCUGAGAUUAUGAGACUCUUACUCAAGAAAAAUUA  
>N4948  
UGGGUUGUAUAAAAAGCAAACUGAUUAAGCCACAGAGAAC  
>N4949  
CCUUGUCAGGUGCUGAUAGAACUUCUCAGGGAACAGCAAUA

>N4950  
UGAGGGUUUAAUUUGUGAAAAACUUUAUGCUCAAUUUUGGAG  
>N4951  
CUUAGGCCUAAUUCUCCUGAACUAUCAGUUUGCCACCCAUC  
>N4952  
UCUUGUCUUCAUGAUAAUUGGACUGAAUCUCAGCAUCUGCAA  
>N4953  
ACAAAAAAGUGGAGCAGAAACUAAAAUAAGGACCAGCUAG  
>N4954  
AUUGAAUUGUAUUUUUAAAACUCUUUUAGGUUUAUCUACA  
>N4955  
UGGCUUAUGAAAGGUGAAGAACUGGUUUUUCUCUAGGUCCU  
>N4956  
AAUUUGUUAUUACCUUGUAAACUUUGAAAUUAAUUAUGCAG  
>N4957  
GCCUCCAUGGUGAUGAUGGACUAAACCUCUGAAGCUAAAA  
>N4958  
UUCUUCAUCCAGUCAUCAAAAACUGUGUUUCUUUGUUGAAUA  
>N4959  
UCCAGGCAUGAUGAGAAUGGACUAAAUCUCUCUAAGACAGC  
>N4960  
GACUCUAAUAUCCACUAAAACUAGUGUGUUACAUAUUUA  
>N4961  
UGAGAAUAAAUAUUCUGAAGACUCCUCCUCAAGUUUCACA  
>N4962  
CAUAUACAGUCAUUCUCAGACUUUGUGCUAAUUGCCCGGA  
>N4963  
UGGUCUCUUUCCAAAGGGAAACUGCAUUAACCAAUACAAGA  
>N4964  
UAUCAUCUUGCUAAGUGCAGACUAGGAAAUAAUUAUAAAUG  
>N4965  
ACCGCAAGCCCAGGAGUGGAAACUCCCCACAGUGAGCUGGAA  
>N4966  
ACUUAUGUCAAGUUGAUAAAACUAACCAGCACACCUCUCUU  
>N4967  
CUGGUAAAGGUUCAGUUAAAACUGCACUUUCAACAUCUGA  
>N4968  
UAUAAGUGUAUAUACAAAAGACUAAAGGAGAAAUAACGAUG  
>N4969  
UACCAGAUGUAGUGCUGAGGACUGAACCUGGAUAUUGUGA  
>N4970  
CCUGCAAUAGAAUGCCUUGAACUACCUGCCAGUCCAGAUU  
>N4971  
ACCUAAAUCUAAAACAUAAAACUGUUAAAAGUCUUAGAAGAC  
>N4972  
AAAAAAAAGGUGUAUAGAACUAAACUGAGAUUUCACAAC  
>N4973  
CACAGGCUUGAGGAUCACAAAACUAUGUUUAAUAUGUAUGG

>N4974  
CAUAUCUUGUGCUACAGUGGACUCAGACUUUGGGGUAGCC  
>N4975  
UUUCUUCACUAUAAAUUAGAACUUGAGACUAAUCACUGCUG  
>N4976  
GGAUUUGGUAAGACAACAAGACUGUUGGCAUUAAGUCGCUU  
>N4977  
CUGGACUGCAGGAUGCAGGGACUGAAUAUGCUAGGCCAGGA  
>N4978  
UCCAGUUUAUUAUUAGUAAACUAAGACAUGCAAGAGCCUA  
>N4979  
AUUUGCACUGGAUAAUAGAAACUGGAGAACAGACAUGUUUU  
>N4980  
GCUAUACUUAUAGAUAUAGACUAGCAUAACUGUCUUCUGA  
>N4981  
ACAAUUUCUUGAGGAAUAAAACUUAUUAAGUCACUUGGGUA  
>N4982  
GAAUAAAAGUUAUGCCAAGGACUCAAAUUUCUCAGAAUAA  
>N4983  
CACCCAAACUUGCCAGAAAAACUAGAUAAUAACCUAAAAUC  
>N4984  
UCUGCAGGAGGCAAUCUGAACUCCAGAUUCUGUGCACCA  
>N4985  
GGGAUGAGAAACUCUAAGGACUCA AUGGGAGUGACCUUAG  
>N4986  
GAACCUCACACAGAUUGAAAACUAAUUCUAUUUAUUGCCUU  
>N4987  
UCCUCAUUCGGAACCAGAACUGCGGGUCACGGUAAUAAA  
>N4988  
AGAAGAGGGGAAUUGAGGAGACUCUACCUCGAGUACCAAGA  
>N4989  
ACAUAGCUGUCUUCUAAGAAACUCUGCCAGAGCUUGACAAA  
>N4990  
GUUCACUGGAAGAUUUUCAGACUGUAGUGAUUUAAAACAAA  
>N4991  
UUGGAAGUUACUAGUUUAAAACUGUCUCUACUAUACCGGAG  
>N4992  
UGAAUCUAUUUCAGUGGCAAACUAACAAUCGAAAAAUUGAU  
>N4993  
GUAUAAAAGUAUUAUUAGACUUGUCACAAAAUCUAUCC  
>N4994  
UCUGAAUGCAAUGCCAGUAGACUGUUGUUACUAUGUGUCAU  
>N4995  
UAACAAAACUAAACCAACAGACUACAUUCUAAAUAAGCAA  
>N4996  
CAUUCAUAUACAUUUAAGAACUGGAUAGUUUCGUCUAUUA  
>N4997  
AAUUGAAGAUUCAGAAAUGAACUCACACACCUAUGGUCACU

>N4998  
UUCCUGGUACUUAUAGAGAACUUUCUUGUAGCAUCUUUAU  
>N4999  
AUAGGGUUCUUAUACAAAGAACUUCACAAACCACAAGUUA  
>N5000  
AAGAAAGAAUACACAAACAGACUAAUGGAAAGCCUUUACAG  
>N5001  
GCUUCUGACCUUCAGGCUAAACUCCUCCCCAGUUACUUAGC  
>N5002  
AAGUCCACAUACAUGUGGAAACUGAACACCACUCUACUCAA  
>N5003  
GAGUCCCCUUUGUCUUGAAAACUUUAUAUGUCCCAGUAUAG  
>N5004  
UUGAUUAUGAUGAUAAUAAAACUGGAUUAUAAAUCAAGUC  
>N5005  
AAUCAAGAAAGUAAUCCUAAACUCCUAAACAUGAUAAACAG  
>N5006  
UACAGUAUUUGACAAAUAGAACUUGAAGACAUAAAAGACCC  
>N5007  
UACUAUAAGUAUUAAGUAGAACUGUAUAUCUGGCUCCAUA  
>N5008  
CAAAAUCCUUAGGACCUGAACUGUGGAAUCUGACAUAGCA  
>N5009  
UUGUGCCUCCGAGAUGUUAGACUUAACGCUAAAUAAGUUGCA  
>N5010  
GAAGGUUUUAUGUUGAUAGAACUGACCUCUGUCCACAAU  
>N5011  
CUUCAUUGCCUGCUCUUGGGACUCUGUCCUCUCACUGAGU  
>N5012  
AUCAUCAUGAUUGAAUCUAAACUAUAAUAAGUAAGUGAGCA  
>N5013  
CUGGAACCAUAAUAAAUGAGACUCUAUUUUUUUUUAAGA  
>N5014  
CCUAAUAAAAGACACUGAAGACUUCACUCCCAAACUCAUAC  
>N5015  
GGGGACAUAGGCACGUAGAACUUGAGAAAUGACAGAUCAU  
>N5016  
GGCAUAUGGCAGAGGUGAAGACUGACUAUCAUGGCAGCUGC  
>N5017  
GGCUGAUGAAACUCUUUUGAACUAGAUAGUAAGAGUGUUG  
>N5018  
GGGUACAAUGUGUGUUUGAACUUUAGUAAAGUUUCUAAU  
>N5019  
AAUGUCCUUGAUCCACUUGAACUUGGGCUUAACCAAGGAGA  
>N5020  
CAUGUCUUAACUAUAAAUAGACUGGGAGACGGAGGCAUAC  
>N5021  
AGAUGACAAUGAUGGGAAAAACUUGC UUAAGCUUUCACAUC

>N5022  
AGAGUACUCUGAACACUGAAACUCAGGAGAAACCUAGCAUC  
>N5023  
GAAAUAAUAGAAGAGUGGGACUCUAUUUUCAGGAGUCAA  
>N5024  
UGUUUUUUUAAGAAAGAAAACUGCUGGAAUGGAAAAUAUA  
>N5025  
CAGAAAAGGCCUGCACAGAAACUGUGGAAACUAUUAAUUCU  
>N5026  
AAGAAUGACCCCUUUAAGAACUUGAGAAGGGAAGAUAGUU  
>N5027  
ACCAGUCAGAAUAGAUUAAGACUGAAUCUAAAAGGUCCA  
>N5028  
AAGCAAGGGGAAUGUAUCAGACUAAUAUGAAAAUGGAGUA  
>N5029  
GCUAGGUAUGGCUUCCAUAAGACUCCUAUGUGUGAACAAACC  
>N5030  
CCCUAGACAUUGCCUGAAAAACUCAACAAGAUUAUAAAU  
>N5031  
AAAUUAAACAUAUUGAGAGAACUAAUGAAGUGGACAGCAU  
>N5032  
AAUAUUCCAAUGUAUUUAGACUAAAUAUGUUUCAAUA  
>N5033  
UGUUAAGAAAGACACACUGAACUUAUAAGACAGACCAGUU  
>N5034  
GAUGCCUUUGAAUUCUGUGAACUGAUUUGCACUGCUCUGAG  
>N5035  
GCUCUUCUCUUCUGGAUAGAACUUUACGUACCAUAUCGUGU  
>N5036  
AUUAAGAUUGUUCUCCACAAACUGAUAGCAAGUGCCUAUU  
>N5037  
AUGCAAAACAAUUGAUCAGGACUCUUCACUUAUUCCAAAA  
>N5038  
AGCCCCAAAAGUUUAGUAGACUGUGAAGCAAUUGGUUUU  
>N5039  
CACAACCUUAAAGAACACAGACUCUCUUUUCAGAAGAGUUA  
>N5040  
AGUCAGUGCUACAUAAGGAAACUCUUUCUAAAAACAAAA  
>N5041  
GAUCACAGGAUGGCAUCAGAACUCCAGGAACUUGCAUAGCA  
>N5042  
GAAGAGAAAUUGAACUUUAGACUUUUAACACAGUUGAGACU  
>N5043  
GAACUUGAGUAUGGUAGCAAACUCCACAAUAAAAUAGUUA  
>N5044  
AUCAUUGGGUCCAUCAGAAAACUAAUCUUCUGGAAAACCGC  
>N5045  
UGGAUCUUAACACCUAAGAACUGAGCUAAAAACAUUAAG

>N5046  
AUAAGAUAAAUAUAAGAAAACUACAAAACUGACAAUCACA  
>N5047  
UUUCCUUUGGAGCAAUCAAACUCUCCCUUUUCUCCUUGAA  
>N5048  
GAGACUUACCCACAUCUAAAACUCAAAUCAACUAAUUUUUG  
>N5049  
GAGGAAAGAUCAGGAGAUAAACUGAAAAGAAAAAAAAAAAA  
>N5050  
UCAAUACUCCAUGGCAUCAGACUUAUUUAAGCUCAUGGCUA  
>N5051  
CUCAUCUUUGGAGUUUCGAGACUAUGCAACACUGGCACUUU  
>N5052  
UGAAAGCCUCUCAUAUUUGGACUAUAAGCUAAAGACAAAGG  
>N5053  
CACAUUUUGUUUUGGAAAAACUGGAUAGAAUAGUGUCUAG  
>N5054  
CCCUAAGUACCGAUGGGAGGACUGAAAACAAGUACCAGCA  
>N5055  
AAUUAUAAUAGCUGUAUGGGACUAAGAUAGUGUCUAGUUA  
>N5056  
UUACUGAAUUGCCUUUCUAAAACUCAUCCUACACAGUACAAG  
>N5057  
UCAGGAUUCAGCCUGCUCAAACUUCUCCAACCUUGUUUC  
>N5058  
CCUAAUCUGACAGGCUUUAAAACUGACAUUACAAAGUUCACC  
>N5059  
AGGUGAAGGAAUUGAACAAAACUAUCCAGGAUCUAAAAAUG  
>N5060  
CAUGAUCAAAGUGGGGAAAAACUGUUUUUGUUUUGUUUUGU  
>N5061  
GACCUGAUUUUAUGUUGGAAACUGUAAAUGUCCAUAAGCA  
>N5062  
AAUGUUGAAAAGUUCUGGAAACUUCUAAUAGAAAACUUGUC  
>N5063  
CUUUUAAAGGCUUGAAUAAAACUUUCCUGUGUGGAAGGGGU  
>N5064  
UAGAUUCUAGCAGCAUGGAAACUAGGCAGUUGCUCAGCUAU  
>N5065  
CAUUCAUUUGGCAACAUAAAACUUGAGGCAGGAAACAACCA  
>N5066  
CUCUGUUUCUCCGGAUCAAAACUGCCAUUGCUCAUUGCUGU  
>N5067  
GCUAGACUGGAUGACCACAGACUUUGUGGAUGGCUCUAUGC  
>N5068  
AGCUGGGGAUCUUCCUUGAACUAUGCUCAGUGCUUCUCCA  
>N5069  
UUCACCUUUAAAUAAGUAAAACUAAUUACAUAAGGGCAGUUA

>N5070  
UCCUCUGUUUGACACAGAAGACUCAUUCAAACAUAAGUGAC  
>N5071  
GCCUCAUAUCCAUAUAUAGAACUCUCAGUCCUUCUCCAUG  
>N5072  
GAAAUACCAGGUCCUUUGGACUUUCCGUGACGCACGAAG  
>N5073  
UGGUUCGCCUGCCCUGCAAACUCUCUGACAUACAGUAUGA  
>N5074  
UUGAAUACUUAUGAAAAGAACUUUCAGGAAAGUUUGGAUG  
>N5075  
UGAGUGUAUGAAGCACUUAGACUUAUUCUAUGUGAUUUA  
>N5076  
CUCAGAGCUAAGGACUGAAGACUCUCUGCAUCACAGGGAU  
>N5077  
GUUCCAUUGUCCAGCCUGAAACUGUUAACUGGAAGUCUGAC  
>N5078  
UACAACAUAUAUGAGAGACUUACAAACCCACACUCACC  
>N5079  
CAAAGAAAGUUUCCGUCCAAACUCCCUUAUGAAUAUUGAUG  
>N5080  
CUGUAGGGGGCAUCGCUCAGACUAGCUGGAGAUUUCAGACU  
>N5081  
GAACUUGGAUAAUGAUUAAAACUAUCAGAUUUCAGGGUCUA  
>N5082  
UACCCAAGGAGCUAAAGGGAACUGCAACCCUAUAUGUGGAA  
>N5083  
CUUGACAAUAUUUGGAAUGAACUACAAUCCGGAAUUGGAAG  
>N5084  
UCGCCUGCUUGCUGCGUGAGACUGAGUAACUGCUAGAUCU  
>N5085  
CAAAGAAAACACAGGGUGGGACUCAUGGCUCUAGCUGCAUA  
>N5086  
UCUCAGGGGUGCAGGGGUAGACUGACAUAUGGAAAUCUGUC  
>N5087  
AUUUUAUAUAGUACCUUUAACUGUUUAAAUAUAAAUAUU  
>N5088  
UCUCUUGGUUAUAGCUUGAAAACUGCCGGGCAGGAGAAGUA  
>N5089  
UGUGUAAGUGUUGGAAUAAGACUUUAAUCCAAUCCAAGG  
>N5090  
UGUAAAUGCAUCCAUGGAAACUAAAGGUUAUAGAGGCUAU  
>N5091  
UGUAGAUGCCUGAAUCUUAGACUUCUCAGCUCUAAAUCUCU  
>N5092  
GACAUAGAACUAGAAAGAAGACUAUAAGAAAGAGGAAGAGA  
>N5093  
AUUAGGACCUGUCUUAUUAACUUUUGUGCAUGUACAGGUA



>N5094  
GACAGAUUAUGUAUCUAAAACUGAUAGACUCAAAAUACAA  
>N5095  
GGGCAGUGUUUUUGCCUGAGACUGAGCAAAGGGGAGAAUGA  
>N5096  
CCAUGGCUCUCCACUGUGAAACUCAAUGAAAAGAGCCAGUC  
>N5097  
AAUAGAAGUGUUUAUAGAAGGACUACAUUGUUAGUGAUUCUU  
>N5098  
AAUUAUGACAGGCUGCAAACUGGCAGUUUAGGAGACUAG  
>N5099  
AAUGGUCAGUGAUAAUGCAAACUUUGAAACUGGGUUGUCUG  
>N5100  
UGC UUACAGCCAACCAUUGGACUGAACAUGGAGACCCCAAU  
>N5101  
GAUAUGAAUUAUAAAGCAAACUAUCUUAUUAUCUUCCUC  
>N5102  
UCAUUCUAACUCUUUUCAAAACUACCCCAUUCUUUUCACC  
>N5103  
AAUUUAAAUAAGCAAUAAGAAACUAGAUAAUUUGGCUAAAAA  
>N5104  
UCAUAUACAAAGCUUUUAAAACUUAUUAUUAUAAAACUUGA  
>N5105  
AGACAUUUGGUUGAUAAUAAAACUUGAAGUAUUUGUCCUUG  
>N5106  
UACUUCUUAAGAUAGUAAAACUGUGUUAAGCAAUGACUA  
>N5107  
GUCUUUAUGAUCUAGCUGGAACUAGCUAUGCAAUCUACAAC  
>N5108  
ACAGUCCAUAUCAGUACAGACUCUAUAGGACCACCAUGGUA  
>N5109  
CCAAAUACAGAAAAAUUCAGACUUACUCUCUAAGAAAGGAU  
>N5110  
UACACAAAGUUGGGUAUAAGACUUUGAUGAAUUUUGAUUGU  
>N5111  
UUACCUGAGGAUUAGUUGGGACUUUAACUCUCAUCUGCAAG  
>N5112  
GAGAUACACUGUGCUCAUAAAACUGAAAAGUAACAUUAUAGCU  
>N5113  
UCCAGGUUCUAUGACAUGAACUAUCACAGUUCAGUGAACU  
>N5114  
GGAGAUCUCAGUGUUGUAGAACUUUCUGCAUUUGUGGCCAA  
>N5115  
GUCACUGUGAGGAUCUGAACUCAGAACUCAGAUUCUUCUA  
>N5116  
AAAAACAAAAAUGGUUAAAACUUUAUCUGCUGGCUUUUCA  
>N5117  
UUUAAAUUUGAACAAUCAAAACUUUAAGUUGUAUUAUAAUA

>N5118  
CUUACAAACAAGAUGAAGAAACUUCCUAUCUCUGCCAUGGG  
>N5119  
ACAGACUCUCUUACUUCAGGACUGUGUACAUGACACUUAUC  
>N5120  
GAGAUUAAUAGAACUACAAAACUAUGCAAUAAAAAAGAGUG  
>N5121  
GAGAAUUGCUUUCUUAGCAAACUACAGAUUUUGCCCCAGCC  
>N5122  
GGUUCUCUUAAGUGAUUGAAACUGAUACAACAGAUUAGUAU  
>N5123  
UUUUUAGACCAGAAUUUGGAAACUGAAUAAUUAUCCUGGCUC  
>N5124  
UGAAAAUUAUUGACUCUAAAAACUCUACUGGGUGGACAUGUC  
>N5125  
AUUCAUUACUUACUCAGAAAACUUUGAUAAAAGUUUCUCUU  
>N5126  
CACCCUAAAAGGACAGGUGAACUAUUGCACACUUGCACAAU  
>N5127  
GUUGUAUCCACUCAUAAUGGACUGGACGCUCCUCUAUACAU  
>N5128  
UUGAGUCCAAGUGACAAAGAACUAGCCAGCACACUAUCUAU  
>N5129  
AUUGCUCACAGGUGCACAAGACUCACAUAAGCAAAAUUCAG  
>N5130  
AACUGGUUAAGAGCCAAAGAACUGGUUACAAAGUGACAGCU  
>N5131  
AAAGGUGUUUACUAAGCAAGACUGACAUCUUACUUCAGUGU  
>N5132  
GUACUAAUUAUUUUUCAAGGACUAUCACCCAAUUAAGAUUAA  
>N5133  
AAUCCAUGUUUGUAAAGAAAACUAAACAUCUGGAAAGUUGA  
>N5134  
AUGUGCAAAGAAAUACAAAAACUAAAUGAUUUGAUCAUGUA  
>N5135  
GAGAGGGGCUGUGGUACAAAACUCCAGGUCAUCUCAGCCCU  
>N5136  
AAAUUUAAAAUCCCUACAAACUAACAGAUUAAGUGAGAAA  
>N5137  
GCUUACUGGCUCAUUUAAGAACUGGAAAUAAGCUGGGCGU  
>N5138  
AACACAGCUCACUAUUUAGACUUAUGGCCACUCUAUAAC  
>N5139  
UAUAAAAUAGAAGAUUAAAAACUAUUUGUCUAGUUCAAAGU  
>N5140  
AAAAAAUUGAUACAAAAGAACUUGGGAAAAGAUGACUAAA  
>N5141  
UAGAAGACAUCUCACAGCAAACUCCCUGAUUUCUGGCUCU

>N5142  
UGAUUGAAAGUAAAACUAAAACUAUUUCUGGCAUUUAUAAA  
>N5143  
GGGCCAUUAAUCCUGUGGAGACUGGAUGUCCCAGUUCAGGU  
>N5144  
CAUCCACUGGAGCACAGGAAACUUCCCAGUGGGAGGACUCU  
>N5145  
AUUAAUUAGGCACUUGUAGGACUUGAGAGAAGGAACACAGC  
>N5146  
AACGUUCAGAAAAAGGCCAGACUGAAACUCACAAAAAGCAU  
>N5147  
UACCUCUAAUGAAUGUCAAGACUAAGACUCCUGAACACUAU  
>N5148  
CCAAAGUAAAGGAAGCAUGGACUCUGAUCUUUAAUGUUAGA  
>N5149  
UUACUACACUCAGACAGUAAACUCAAGCUCAGUAAGACUGA  
>N5150  
AUAGUGUCUGGAGUUUAUGGACUUUUUAUGGAAGAAUAAUAA  
>N5151  
GAUCCACAGGAAGAGAAAAAACUGGUCCUAGCCUGGGCUAU  
>N5152  
UUUACCAUAUGCUAUGCAAAACUGACAGUAUUUACCUUUGG  
>N5153  
CCAGGAUAUAUAUCAAUAAAACUGAAGCAUUUUGUCUGGAU  
>N5154  
GAAACUUUUAAAAGAUCAAACUUUCAGGAAAGUAGAGGAU  
>N5155  
CUUGACAUCAACUGCUAGAAACUAUGAGGAGGAGAAGGGAA  
>N5156  
AUUUUAUACAGCACUGGUGAGACUGCAAACUGUUGUGGGCAC  
>N5157  
GCUAAAUAUAGUAAAAGGAUAAACUCUGAUCUAGACUCAGUUU  
>N5158  
AUACAGACCAUAAAAGGGAAACUCUACAGUACUUUUCUGCU  
>N5159  
CCUCCCUUGCAGAUUAUGAAACUUGGGAGGGCACCUUGACU  
>N5160  
AAAGGAGUGGAGAUCUGAAGACUGCUUUGACAUCAGCCAUG  
>N5161  
CUUGCUAUAUUCUUCUAGACUUAGGUGAUGGUUCAUGUC  
>N5162  
AAUGCAUAUGGACCCAUAUAGACUCAUAUUUGAUCUAGGUUA  
>N5163  
UUAAUCCAAGAGAAAGUAGAACUCAUAAAUAAAUGUAUAA  
>N5164  
GAAACAAGCAGCCUCAUGGGACUGGGCAGCUACUAGAUUAC  
>N5165  
AGGACCGGGACAACUUGAAAACUGCUUAAUAACAAAUUACA

>N5166  
UUUGUGUGCAUGCUCUAGGACUGUCCAAUACCUCUAAAA  
>N5167  
GACCAUAAAACACCACUGAAACUAUUUACUUGUUUGUUUGU  
>N5168  
CAGACAAACAAACAUUAUAAAACUGUAAACUUUUAACUCCA  
>N5169  
GAACUUGCAGUGUAAGCAAAACUUGCUGGCCACUAAACUAU  
>N5170  
AGAUACAUGAACACUAAUGGACUGGAAGAGAAAAGAAAAUU  
>N5171  
AUACUACUAUACCCAGUAAAACUCUCAAUACACUGUUAUGG  
>N5172  
UAGAAAACACUAUACAGAAAACUCCAAAGAAAGAAAAUAA  
>N5173  
UUUUGUGUCUUUGUUGAAGAACUUCAGAUUUAUGUCAAUGA  
>N5174  
GGAGAUUGAAAUAUUUCAGACUGAGUCAGUGGGGUGUCAU  
>N5175  
UAGAAAUGAUUCCAGGAGAACUGCCUUUGUUCACAGUCAU  
>N5176  
CAUUAACCUGACCUGGUCAAACUGUGGUCUAGCUAAUCCCA  
>N5177  
GAAUUGCAUGUGUCUAGUAAACUAAAUAACUCCAAUGUCC  
>N5178  
UUUGUGGUGGGGAAUUGAACUUAUGACCUCAUAAUUUU  
>N5179  
GGCAAUUUGUUCAGCACGGAACUAUAAGGCAAGUAGUCUAC  
>N5180  
UACACAUUCUUAGAAGAAAGACUUGUGGAAGCUAUUCACGU  
>N5181  
AAAGAGGCCAUGAAUUUAAAACUAAAUGAGAGGAUAUAUGA  
>N5182  
GAGGACAUUGGUUAGAGGGGACUGUGCUAUCUUCACAUAAA  
>N5183  
AUACUGUGGAGGUUAUUCAAACUCCUUUCUGUGUUAUGCUU  
>N5184  
AGAGCUUCUCCAACCCUCAGACUUAGAACACUGUGUGUGUG  
>N5185  
GAUUGUAGGAAAUCAAAGGACUCAAGUAACAGCCAUUCUU  
>N5186  
CUGUGACAACUGAAAUCGAGACUGAGACAAUUUUUACAAAG  
>N5187  
CAAUACAUCUAUCUUAAAACUUUAAAACCACUUUAGCCA  
>N5188  
ACAUCGCAAUGUGGUUUAAAACUUUGACUCAAUUAUACUU  
>N5189  
UCUAGGCAGAGCAAUAAGAGACUAAAGAAGAUCAAGGGGAU

>N5190  
UCA AUG AAA UCC CAU G AAA ACU CCA ACACA AUUUUU AUAG  
>N5191  
GGA AGU ACCUC GCCUUGCAG ACUUGAAGUGCCAGGGUGAGA  
>N5192  
AGCUAUUUUAAAAGGAGAAA ACUGAGGACUAAAUGUCACAU  
>N5193  
UAGCAGAGCCUGAAGGAAAG ACUUCCAGUGACCAGCUCAA  
>N5194  
AAAAAGUAAAAGAAUGAAAA ACUCAACACGGCUCCCUGUUU  
>N5195  
AUCCCAUAAUCAGCCUCCAA ACUCUGACACCAUUGCAUACA  
>N5196  
AAUAAUCACAGCUCAGCCAG ACUCCCAUGUCUCCCUUUAU  
>N5197  
UCAAAACUGAUCAAACCUGA ACUACCAGAUUGGCUAUAAAU  
>N5198  
AACUGCUUGUUGUGUUUAUAA ACUAGAAAGUGGAAAGCUUCA  
>N5199  
UGCCACUUUAUUGAUAAAAGA ACUAAUAAAGAUUCUUGGUUA  
>N5200  
CUAAAUAGAUGAAUGCAUGA ACUCUCUCCUGUACAGAAAU  
>N5201  
AAGUUUGGGACAAAAGCAGG ACUAUCAUCCAUGAAAACAA  
>N5202  
UCAGCAUGGUCCAUGAACAG ACUAGACUCCAAUAAAGAAGA  
>N5203  
AAUGCAUAAAAUGAUAAAA ACUAUCAACAUAACAAAUUU  
>N5204  
AAUUAUAGAGCAUGAAACAA ACUAGAUCUAUACAGUACACA  
>N5205  
UACAGUUUGCAUUGAAAUGA ACUCAUGAAACUAUGUUAGUA  
>N5206  
GGCCAGCAUUGUAAAGAGA ACUAAGACUCCAAAAACCAC  
>N5207  
AAAACAAAACAGUUGUUGGG ACUAAGUUGUAGCUCAGUAGU  
>N5208  
AUCAAAUUUUUGAUAACAG ACUAAACAAUUUUGAAAUGAG  
>N5209  
AAUAUUGGAUUUAACAAAGA ACUUUAAAUAACCUAGGAAGCU  
>N5210  
UUUCCUCUUUUUCUGUAAGG ACUUCUACCUGUUUGAUUGUG  
>N5211  
UUUCCUGUUUUUCUCUAAGG ACUUGUAACUCUUUAGCAGUG  
>N5212  
UCAGGGAAAUGCAAUCAAA ACUCCUUUGAGAAUUCAUGUU  
>N5213  
AGUAAUUCUGAU AUGUCAAG ACUAGAGAUAGUACA UUUUAA

>N5214  
CUGCCUGCCCGUCAUGAUGGACUGUAAUCUGUAAAUGAAA  
>N5215  
AUGGUAACUAGUAAUAGAAAACUUAACUGGAAGACUAGAAC  
>N5216  
ACAAUCUGACAAUACAGGAAACUGAUUAUCUAAAACAAAUA  
>N5217  
CUGCUAUCUUCUCCUCUUGAACUUUUCUCCUCAUGGCCUCA  
>N5218  
AGAUUCCAGGGUGGGUUGGAACUCAGAGGGAAUCCCCUCU  
>N5219  
AAAUA AAAACCAUGCCAUA AAACUAAAGGAACAAUUAUCCA  
>N5220  
CCAAUUUCUUAACUGUAAAACUUC AACUGCAUCGUUAUA  
>N5221  
UAAGAGAGACAGCAAAUAGGACUGGUUAUUCACUGGCCUAUU  
>N5222  
UUGUCAUUUGCUUGCUAUAAACUGGGUGGCACCAGAGACCU  
>N5223  
GGCACAAACUAUUCAGAUAGACUCUGUCAUUUCUGCAAACA  
>N5224  
UACACAACUCAUUAAGCCAAGACUAAUCUUCCAUUCUUAUU  
>N5225  
GGUUUUAGGAGUAGGCAUGGACUUAUAGUGAUUCAUGAUC  
>N5226  
GAGAAAAACAAGGAAGGGAAACUGCAAGCUGAACAGUCCU  
>N5227  
UUAGAUGUAAAAAUUAUAAAACUGUAAAAUCAAAACAGAAG  
>N5228  
GGCUCGAUCUCCAAAACAGACUGUUC CACCUACCUACUCU  
>N5229  
AGGAGAAAGGGAAACACCAAACUGCCUCUAAUCCAGUCUAC  
>N5230  
CUGUCUUAUGGGUGCUGGGAACUGAACCUGGAUGCUCUGCA  
>N5231  
UAGAAAAGAAAAAUCAAGAACUCACCAAGUACAGAAGGAG  
>N5232  
ACAAGGAGCAGUGAGCAGAAACUGAAGGAAAAAGAAUUAAC  
>N5233  
ACCAAUUAGCACUCCAUUAGACUUAUGUUUUUAAUGUUCUA  
>N5234  
AGAAUGGUUAUAUGAGAUAAACUGAAGAUUCAAAAUCAU  
>N5235  
CAACAAAGAAAGAAUUACAGACUAAGUUUAUCAUAAAUA  
>N5236  
UACUUAUCCACCUAAAGAAGACUCAACUUUAAGUGGAGCAA  
>N5237  
CUGCUGCAAGAUCAAUGUAGACUUC CAUGAAGAGUAGACUU

>N5238  
CUUGUGUUUCAGACAAUAGGACUUUCAGUAAUAGGCACAUA  
>N5239  
GCCUAUCAGAAUACACCAGACUUUUCACCAGAGACUAUGA  
>N5240  
GCUUAUCUUGAGUCACAAGGACUUUAAGGACUUGAAACUGG  
>N5241  
UAGGCAAUCAUGUUGGUGAGACUUUUUUUAUAGAACUCCAGA  
>N5242  
UGGGGAGGAAAGAAGUCAGGACUGGAACUCAAGCAGGUCAG  
>N5243  
UUCUGUUUUAUUUCGCCCUAGACUUUAGUGCCUAUUUCUUAU  
>N5244  
ACUUCUUUCCUUAUCCUUGAACUCAGCAACAAGGCCUUUGU  
>N5245  
UCCGCGGCACGGGGACGGGGACUCGCGUUACCUGAGCGGCG  
>N5246  
GCUCAUUAACCACCUGGAAAACUUUGUGGUUAGACACCAGC  
>N5247  
GGUCUAAUUAUUGCAAAGAAACUUAGAAAUUCUAAAAUCUG  
>N5248  
CUUGGGUGGAGCCAAAAAGACUUAAGUAAACGGGCCUC  
>N5249  
UAUUA AUGCUGCACAUCCAAACUCACAGAUCUCUCCACUUG  
>N5250  
GGCAUAAUACAGCCCAGAAAACUAGUCCUCUAAAGAUACUU  
>N5251  
AGUUAUUUUGUUCUUAACUAAACUGGUCCUUAUUACAGGAGG  
>N5252  
UUAAGGCUAGAAAGGUGGAAACUUUAGACAUAGCCAAGCCU  
>N5253  
AUGGCCUAGAGGGAAGGUAGACUACCAAACUGGUUUUUA  
>N5254  
GAUUAUUUAUUCACACUAGAACUUCUUGACAGAGCAGAAAC  
>N5255  
AUCAAGAAAUAUCCACAGACUUCACUAUAGGCCAGAUGA  
>N5256  
UUUCAGACUUACAGUUUAAGACUAAAUUGAAACAAAUGGC  
>N5257  
UAGUUUCCAUGUUUUGGUAGACUAUUGAAAUGGUUCCGA  
>N5258  
GAUGCUGAGAGAUGUUAAAGACUAAUGAUUGUUGCUUUCUG  
>N5259  
UGC UUAGGACUGCAGUUAGGACUGCAUACACUAGCAAGAUU  
>N5260  
CUUUCAUUUUGGUGCAUUAACUCAAAGGAAGAGAAAUCAC  
>N5261  
GUUUGAGAGGCAAUGGAGGACUAGAAGUCAUCUCUAGAAC

>N5262  
AAGAGGACACCUGGAGAAAGACUGGCAGGGAUGCUGCAUUC  
>N5263  
GAAGGGGAAAUGGGGAAAGACUCAUCCACAAAUCCUGAGA  
>N5264  
AAAUCUAAGUGGAUCAAGGAACUUCACAUAAAACCAGAGAC  
>N5265  
GACAAAUGGGACCUA AUGAAACUCCAAAGUUUCUGCAAGGC  
>N5266  
UCUAGACCAGAGGUUCUUAACUAUUGGUUGUGGUUCCUUU  
>N5267  
CUUUUUUGGAUUUCAACAAACUUUCUACCAACUGAAUCCC  
>N5268  
GCUUAACUAGAGUUGGAGAAACUGAAGGAGGCUGGGAUGAU  
>N5269  
CUGACCUGCCUGCCAGAUGAACUGCUUCACUACUAAGACUC  
>N5270  
GGGAGGUAGUCAGUGAUAAGACUCGCAGGGCAUGUCACCAA  
>N5271  
ACUGAGAGAGACUCAUGGGAACUUGCAGAUGUCAGGGAGCC  
>N5272  
UGAGUUUGGAAGGAAGGGAAACUGUGGUUGGCAUGUAAUUAU  
>N5273  
UCUGAACUGAACUCAACCAAACUCGACUGACUCUGUUCAAA  
>N5274  
UACAGAACAAAAACAUUAAAACUUGCAAGGGAAAAAUAGCA  
>N5275  
UGAACAAUAUAUAACUUUGAACUAUUUAAAAGAACAUCUA  
>N5276  
ACACAAGUAACACUAUGUGAACUUGCUAACAAAUAUUUCU  
>N5277  
UCUGUGUUUAUGGGUGUGGAACUUCUCUAGCAAUCCAGGC  
>N5278  
CCUGAGACCCAGCACUGCGGACUGGGUUACUUCUGUUCUUA  
>N5279  
GUAUUUUUAGUAAAUAUAAACUAAUGCUUCCCUGUGUCUC  
>N5280  
GAGCUGUGAACUGGUAUGGAACUUUUGCAAUAACAAUAAA  
>N5281  
UAAAAGACCAGGAGCCAUAACUCUCUUCAGUAUAUAAUUUAG  
>N5282  
CAGUUUUC AUGAGUAUGUGGACUACUGUUGUUUUUGUUUU  
>N5283  
AUCAGACAAAGGAAAGUUGGACUGUGUUAAGAAGAAAAGGU  
>N5284  
CUGUAAGAGUAUAUGCAUGAACUCAGUGAAUUUUAUAGGUA  
>N5285  
AAUCAUGUAGCUUUUCCAGAACUAAUGAUGAGAGUCAUCA



>N5286  
CAAGAAGGUAGACACCAAAAACUAAAAUAACUCAAUUAAAA  
>N5287  
UUUUAUGGUGGAAUCAAGAAAACUACUAAGGAUAAGUUCAGA  
>N5288  
AUGUGAUGUUUUUCUGGAAACUGUCUUAUGAGAAGAUGUU  
>N5289  
UGCUAUUUGUGAGUAUUAAACUGAUGAUUCCUAACAAUG  
>N5290  
AGAGUGAUUCACUCCCAAGAACUAUUUCUAUACAUGUUCAC  
>N5291  
UAAGGAAUUAUGAAGAGAGGACUUGCUUAUAAACACAUAUA  
>N5292  
GCGAUACAAUGUUGCAGCAAACUCCUUGAUUUCUGGCUCU  
>N5293  
UUGCAUAAAUAACCAUGGAAACUGAAGUUUUUAUAACAUAU  
>N5294  
UUUGUAGUAAUCUCUCAAGGACUGACAAGAAUGCCUGACA  
>N5295  
CAGAAGGAAUACAGUUGAAACUGUUUAUAUUAAGUAUAAG  
>N5296  
GCACCAUAAGUGUGCUGGAAACUAUACUAUGGUCCUCUGCA  
>N5297  
AGCUACAGCAACACUAAAAGACUCUGACAACUAAUUUUGUU  
>N5298  
UUCAACUGUAUGAAUUCAGAACUUUUCAGCUGGGGAACGAG  
>N5299  
CGAGGUAAGUCUGAUCUUGAACUUUCUAAGGAAAUUCAAGA  
>N5300  
UAGACAUAAAGUUGGCCUUGAACUCGUAAAAUAUGUCUUCC  
>N5301  
CCACCAGGGAUGGGGAAGGGACUUGUAUGGUCCUAUCCCUA  
>N5302  
GAUGACAGCAAUCAUAGCAAACUUGGAUCACUUCACACAGU  
>N5303  
AAUGCCACACAUCAAAUGGAACUAAUAGUUUCACAAGUAAC  
>N5304  
GAAGAUUUUAAAUAUUGAGACUACUCAAUAAAUCAUAUG  
>N5305  
AAAACAACCAUAUUGUAAGAACUUAUUAAGUUUAGGAAUAU  
>N5306  
CCAUGUACUCUAGAGGCAGGACUCAGAAGAUCUGAGUCACU  
>N5307  
UGGAUUUAUAAAGUGAGCAAACUUCAGAUUCAGAGGGAAUC  
>N5308  
UCCAAGAGUUGAAGAAAGGACUACAGACGUCCUCAGAAGU  
>N5309  
UGUGAACAUUCACAUAGCAGACUAGGCAUUCAGAACAGAAG

>N5310  
AACUCAAGUCAAUAGUUUGAACUAUUAGCCAUGGGAAAUG  
>N5311  
UUCAUAUGACAUUUUCUAAACUAGGUGUAUAAAACUGUUU  
>N5312  
UGUGUAAUAUAGUGAUUAAAACUUCAUACUUUCCUUUAUGU  
>N5313  
CUGAUCUUGUGUUCAGAGGAACUGGUGGUAUAGUGGAAACA  
>N5314  
UGAAUAUGGGUGGACUGCAGACUGUGGCCUGAAAUAUA  
>N5315  
UGCCCUAGAUGGAACUGGAAACUUAUUCAAACCUUUCAGC  
>N5316  
AUUGAUGCAUAGGAUGCAAAAACUGGGACAAGAGAAGUAACA  
>N5317  
UUUACAUACAAUCAAUAAAACUGUUAGCUUUAGUGAUGUA  
>N5318  
GAGUGUAAAAAUGGUAAUGAACUCAUUGGCCAAAAAGUAAA  
>N5319  
GGCAGUAAAAUAUUCAAAAACUAAUACUGCAUUUUUUUUG  
>N5320  
AUGAGAAUUUUCUCCUAAAGACUGAUUAAAAGUGAGUGAAA  
>N5321  
UAAGUGUGAAAGUGUCUGAAACUACAAGUUACAAGAGACAA  
>N5322  
GUUUUGACCAUUUUAGAGAACUGUUUGCAAUUGACUGACA  
>N5323  
CAUGCUGACACUGAAGAAAAACUAACACAUCCAAAAAUGAC  
>N5324  
UUUCCAUUCUGUUUUCUCAAACUCGGAAACCAUGAAAAUUC  
>N5325  
AAAGUUACUGGCAGUCAAGGACUGCUGAGAGUCAGGGACUA  
>N5326  
UUACAUUAGAAGACUUUGAAACUAAAAAAAAAAUGAGACAG  
>N5327  
CAUAUACUCAUAUCACACAAACUCAUACACACAAACACACA  
>N5328  
GAGAAAGUCCCUGCCUAAGAACUUAGCAGCAUAUAAUCUUA  
>N5329  
CUUUCUUUCACUUGUGUCAAAACUAACAUAACCUAUCAAGC  
>N5330  
GUACGUGAAAAGGCUUUGAGACUUAUACUAAAUUGACAUCU  
>N5331  
AUUCAGUUUUUGAUAGGAAAACUAUGACGUGUACUGUUCUG  
>N5332  
UACAAUGCUAGUGAGACUAAACUGACUUUCUGAGAUGGUAU  
>N5333  
AAUAGUCCUGAACUCAAAAGACUCAAAACCGUCCAACUCAGA

>N5334  
AUGAUUUAGUUGUCCAUGAACUUCAAUUCCCCACUUUCAC  
>N5335  
ACAUGACUGAGGGAUGAUGAACUUAACCAGCUGCAUGGCCA  
>N5336  
UAUAGUUGAAUACAGUGGAAACUAGGAUUUAACGUUUGGG  
>N5337  
AUCUUUACAAAACUACAGAGACUAUGCAUUACAACAUGUGA  
>N5338  
CCACCAAGACAAAUUCUGGACUCAGAGGUAGAUGAAGUCA  
>N5339  
UCUCUUCCAAUAUGGCAGACUAGGUCAUCUUCUGCUACA  
>N5340  
UCAGUGUCCCCACUACUUGGACUCCAACUUUUUGUCAUUC  
>N5341  
AUUAUGUACCCUCUGUGAAAACUUCAUAUGUGUAUUUUUGU  
>N5342  
GGAUGUGGAGAAAGAGAAAGACUCCUCCAUAUGUUGGUGGGA  
>N5343  
CUCUGGUGGCAUGCAUGUGAACUCCCACACAAACUCUUGA  
>N5344  
CAUGCAUGCCUGUAACACAGACUAAUAUCAAAACAUCUGUUU  
>N5345  
CCCAAGCUUUUAAGUCAAAAACUUGGGUGUAUUUUUUUUU  
>N5346  
UAUUAAUUCUUUUUGGAUAAACUUCAACUUUUAAAUAACUU  
>N5347  
CCCUGGAACUGUAACUAUAGACUGUAGUAAGCUGUCAUGUG  
>N5348  
CAUCAUGUAGAAUUUUGUGGACUUCUUGUUUGUCCAGUU  
>N5349  
GAGAAUCAUCUCUCCAUGAACUAGGUACACACCUAUUUUU  
>N5350  
ACCAAUCAUCAUCCUGAAACUAUACAUAUACAAGCAAUA  
>N5351  
GUUGAACUUAUUCUCACGAAACUCACUAGCUUUAAAUCCCU  
>N5352  
GCCUUCUCAGACUUCUUUAAACUGAGAUAAUCUGACUUGAA  
>N5353  
AGAGGUGGGUCAAUUGCCUGGACUGUAAAUAUUAAUAAU  
>N5354  
AUAAACGUUACAAAACAUGGACUGAAGGAACUAAACAAACA  
>N5355  
UCUCCCAAGCACUCCACGAAACUUCAACUGGAUCAAGAGGU  
>N5356  
AGUUAGUUAGUGUAUAGUAGACUAAUAACAGAGAAUUGAUU  
>N5357  
UGCUAAGCAGUAUCUACUAAACUCUUUUUUUUUCUUGAGAU

>N5358  
CUCCUUUCAUUCAGUCUGAAACUCAAGACUAUGGAAUGGAU  
>N5359  
UUCUAAAUUUCUUCAAUUGGACUUAUGCUGUUCCAACUUU  
>N5360  
AAUAGAGUGGACAGAUGAGAACUGAGGGAGGGCCACAGGGC  
>N5361  
GAAACAAAGCAUCCAAGCAGACUUAUUCACAUGUAAAUUGU  
>N5362  
UUUCAUUC AUGUCCCUUUAACUUCCAAGUGAAUCAGGCUA  
>N5363  
AUAACUUCUGUGUGAAAAGAACUUCACUGAAAAUUCACUCU  
>N5364  
UCCUUGGGAAAAUAAAUAGAACUGAAUAGAGUCUCUGUUCU  
>N5365  
UCCUUGCCAAGAACAACAGACUUAAGUUUCAUAAUACA  
>N5366  
AGUUUCCUAUAUUGAUAAAAACUAUAGACUAUGUGUAUACA  
>N5367  
AAAAAAACCAAAGACCACAGACUGAGAGCUCCAAAACUUAU  
>N5368  
AAUAUAACUAGAAGAAAGAACUCUGAUUAUUGCUAAGGUA  
>N5369  
UUUACCAA AUGUCCAGGUGAACUUCACUCCUAACUCCUU  
>N5370  
UAUGUGUAAAACUGUCAAAAGACUACAUAUAUAAUAAAGAUG  
>N5371  
AUUUUCCAAGGCACAUGUAGACUAUGACGUCAAUGUAGAAA  
>N5372  
UCAGUAGUUUGCAAAGCAAACUCUAAGAAUAUAUUGAAU  
>N5373  
GGUUAAGUUAAGAAGUCAAAACUCAAAUGUACCUUGCAAGG  
>N5374  
GGAUUAGAGCCUUCUAUCAGACUGUGUUUAUUGACUUUCAA  
>N5375  
UUUAACUUCUUAUAGCAAAACUGUUUUUGUUUACAUGAAG  
>N5376  
UUAACUGCUAAGCCAUAUAGACUGCCUUAUUAUCAGGACUG  
>N5377  
GCAUCUAUUGGCCUUAUAAAACUACAUUUUUAUGUUGGACU  
>N5378  
CUAUCAGCCAGGGUCUCUAAACUGAUGAUUCCAGGUUAAG  
>N5379  
UGGUCAAGGUCCUGGGUUAACUAUAAACCAUUUUUUUUUA  
>N5380  
GACUUUAAAUAAGAAGACAAACUGUCCCAGCUUCAGCAGU  
>N5381  
GUUAAUUGUCUGUUGAAGGAACUUAAGGAUCUAAUAUAAA

>N5382  
UGUUGGCAGGCUGAGAACAAACUUAUUUAAUUAUCACAU  
>N5383  
UAUCUAGAGUCCCGAUUAUAAACUGUGUAAUGUUCUGAGACA  
>N5384  
UAGUAAUGAUCAAUAAAGAAACUGUUCAGAUUCUAUACUAA  
>N5385  
CUCAGCAAUGGUCUUGUCAGACUGCCGAUAAGCAAGGCUCU  
>N5386  
UGGCAACAGUGUAUUUAGACUACAGAAGAAAUUUAUUUU  
>N5387  
UGCUGUUUCUUGGCCAGAACUGAUCUUCUUAUUUUGCAU  
>N5388  
AAUGUUCUAUUUACUGUUAACUUUCCUCACCUACUUCAG  
>N5389  
GUUACCUGCACUGGAGGUAAACUAGAAGCCCCUAAUCCC  
>N5390  
UAUGUGCAAGACCUAAGCAAACUCCAAGAGCAGGCUGGGAG  
>N5391  
UGGGGCUCACACGCACCUGGACUGCACAUGAAUUGGAGACG  
>N5392  
ACUGGAGGGACUUCGGUGGGACUAUAGUAGAUUAGAUGUA  
>N5393  
CCUGAUUUACUAACGUUAGAACUCACUUGACCCUCAAGAA  
>N5394  
GCUGUCACUAGUACAUUUAAACUCAAACACACUUGCUGAAA  
>N5395  
CAACGAUUUUAAAGAAUAAGACUGAAGAACUCUGGGAAUUA  
>N5396  
UACAGAAGGUUUAGAUUUGAACUGGAACGAAUCCAUAUA  
>N5397  
ACUUUUCUUUCUAGGAAAAAACUGAUGGAAGUUGAUUCAA  
>N5398  
ACCCCUUGUGGGAAAGAGGAACUCAGUAGCUCUCCUUUAUU  
>N5399  
AUGUUUCCUAAUUUAUUAAAACUAGGACUCACAAAGGACAG  
>N5400  
UGGGAAGAAGAAAGGAAAGGACUAGGUUUGACGUCAGCAGG  
>N5401  
GGGCUAGUUCAAAAUAGUAAACUUAGAAUUCUCAUUAUAGA  
>N5402  
CCAGUACCCCUAGAAUAUGAACUAACUAGUACCCCUAGAGU  
>N5403  
UAUUGAAACUUGAUGAAAGAACUAUACAUUGAAGAUUUUG  
>N5404  
AAGUAUGAAUCUAUGAAGAAACUCUGAGCUGAAGAGCAGAG  
>N5405  
AUUUUAUAAAUUACCACAGACUUCAUGAGUCCCUUUGAAC

>N5406  
CAGUCAACAUCUGUUCAUGGACUUGGUUUCUGAAGGCCUUU  
>N5407  
AGCAAGUGAACAUUUAAAGAACUCAUUGAAGCUUCCAAAA  
>N5408  
UGAAAUUGACAAGCAAAGAAACUAAAAGGUACUAUGGAGCA  
>N5409  
GAGAAAUAGGCUGCAUUGAAACUGAGUGCUACAGCAGGAGA  
>N5410  
AAAAAAAAAAUUUAAACUAGACUGAUGAUUUCUAGAAUUA  
>N5411  
CAUCAGCUCCUUUUUUGCGGACUCAUUAGUUUGAUAAACACU  
>N5412  
GAAUCAUCCUGAGGAUUUGGACUCAGCUCAUUUCAUCGAAC  
>N5413  
AAUAGAUUCUAACAGCAUGGACUGUAGGCAGCUGCCUGGCU  
>N5414  
UGGAAAUAAGUAAUAGAAACUAAAUGUGAAAAGCAUUA  
>N5415  
GCCUUGUUUCCUCAAGUAAAACUGUCCUUAUCAUAGGAUCU  
>N5416  
UAAUUACCUAGAAUUUUAGACUUUCAACAAGAGUAAGUUC  
>N5417  
GUCAACUUCUAAUUAACAAAACUAAGUGGUUUCUCACCA  
>N5418  
AUACAAGUAGCUGUACUGAAACUGGUAAAAGGGGAAGACAA  
>N5419  
CCCAAGGUACAAUCCACAGAACUCAAAAAGGUCAACAAGCU  
>N5420  
GAGAAAUCCUGUCUUGAAAAACUGAAAGAAAGAAAGAAAGA  
>N5421  
CAGUCAUUAGAAAUCCAUAACUUCAUAUGGCAGCCAAAAC  
>N5422  
UAGCUGGACAUUGGAGAUAAACUGCAUCUCCAAUAUAGGAU  
>N5423  
GACUUAUGUUAGGUUUCAAAACUAUAGGAGAAUGGAACUUA  
>N5424  
AUCUAGCUAGUUCUGAGUAAACUCAGUGUCCUGAGCGCAA  
>N5425  
GUGGUUCUCACACCAGUCAAAACUGCUUGGAAGAAGCAUAGA  
>N5426  
UAAAUUGUAUAUAAUAGAAGACUAUAAAAGCUGGAUGCCAA  
>N5427  
GUAGGACCCGAUGAAGCCGGACUAACCCUUUCACAGGGUCU  
>N5428  
UGCCUUUCUCCUAAGCAUAAACUUUUCUGUGCCUUUAUCUG  
>N5429  
CAAUGUGCUAAGCCUAAAAACUGUGAGGCAUGGUAGUUUA

>N5430  
AUCACAAACAGCCAGUGAGAACUCAGAGAAUCCAAGUGUCA  
>N5431  
CCGCUAUGUCAUGGGACUAAACUCAAAUCUACUUCCUACA  
>N5432  
AUUGUUCAGUAGCAACAGGGACUGAAGGAUGUAGAAGUGAA  
>N5433  
UUCUUUCUGUAAUCAUGGAAACUAAAUACUCCCAAGCAUUA  
>N5434  
UACAUCCAGAUUUUUACUGGACUUCAGGAAGCCUGCAAAA  
>N5435  
AGUUUAGUUACAUGUGAAAACUUCUGGAAUUGUAUUCAUU  
>N5436  
UAUAGAAACUGAGUUCUAAGACUCUGAGUUCCAGUUCUCA  
>N5437  
UUUGACAAGGCCGAGAGAGAACUCAUCAGGGUUUCAUGUUU  
>N5438  
UUAUAUCUUCUUUAUGAAACUAAGGCUGGAAUUUUUUUA  
>N5439  
UGGUUUUAUUUCUCUAGAAAACUCUAUGGUAGACAGAUUA  
>N5440  
GGGAGGAUGAUGGGUGGAGGACUGAAGGAAGCUCAAUGCUU  
>N5441  
CACAGCCACUGCACUCAUGAACUCAUGGAAGCUAUGAUCAC  
>N5442  
GCAAGAUAGCCAAGAACCAGACUCUUGACGUCAACUCUGGA  
>N5443  
CAGCAUACAAGCACAUUAAAACUUUACUUACUCCCCUCUC  
>N5444  
UGUAAGACAAUAACAUUAAAACUUUUAGCCACAGCAGCAUA  
>N5445  
GCUACAUAUGUGUGGGGAAGACUAGGCCUAGCCCCUGUAUG  
>N5446  
UUUAAAACUCUGUUUAAAAACUCAGCUUUUGUGAUCACAU  
>N5447  
UCUGUGAGAGAGCAAACAAAACUCAAAAGUAUUAAAUAGAU  
>N5448  
AAAGACCAAAGUUAACAAAAACUCUAGGAAAAAUACAGCAA  
>N5449  
CUGGGGACAUACAGGAGCAAACUGAGUGGCGUCCGGAUGU  
>N5450  
ACUGACUCAUGUCUGUAAAGACUGUAUUUUGCCCAUAUUUG  
>N5451  
GGAAAAGGUGGAGAACUUAAAACUUGUAUUUGCUUUUCAUGG  
>N5452  
CUUGUAUUUGCUUUUCAUGGACUUAUCCACAGAGAAGUCU  
>N5453  
AAUCUGUAAGUCUUAAAUAAAACUUUUUUGUUACUUGCUUCU

>N5454  
UUUUUCUAGUCAUAAAAAGAAACUCUUUCUCUCCAGCUGUCC  
>N5455  
GCAAAAGAGAAGGGUUAAGAAACUUAAGAAUUUGUAGGCAAC  
>N5456  
AACUUGUUUCUCAUAAUUAACUUUCUUUAUCAGGUCCUAG  
>N5457  
UGGGUUCUGUAGCUGCAAAAACUAGAAAUUUUUCUUAACU  
>N5458  
UGUUUAGACGUCUCCAUAAGAACUUCUCAAGGAACAACUCA  
>N5459  
CAAAAUAUGGCCAGUUAAGACUCCUUAUCUUUUGUUACUA  
>N5460  
UGAAUUACAAUUGAUUCUGAACUAAGUUUGUGGGAGUUUU  
>N5461  
ACAUUAACCGAGCUUCUGGAACUGCUUCUCACAGGUGUUCA  
>N5462  
AUAUGAGCAACAUUAAUAGACUCAUUAGUUUAUACCUAUG  
>N5463  
GUGAUACAGAUCAAGUAGAACUCUCAAUAAAGAAAUCUCA  
>N5464  
UAAAAAGAAAGGAAAUCAAAACUGGCAAAUUAUUCUUCAU  
>N5465  
CUCUCCCAGACUUCUUUUAACUUAUUGC UAAUUUUUCUUA  
>N5466  
AGUUCAUCUAUCAAGGUGGACUGACCCGCAAACAUUCUUC  
>N5467  
UAUGUACCAAAGGGCUAGAACUAGAAAAAAAAAUCCUAG  
>N5468  
AAGGCAGACAGAGGCUGAGGACUUAGGGAUCCAAUGCCACG  
>N5469  
GAGCUACAUGUACAAAGAGAACUUACCCCAAGAGAUUUGUG  
>N5470  
UGGACAAGCGAGUGCUAUAGACUGACA UUGUGACAAGUGAG  
>N5471  
GAAUUAUACACAUUCUCUGGACUGAAAGCUAUUUUAUUUU  
>N5472  
AUACAAA AUUGAAA UAAAAACUUGACCAAAGUAGAAAAGA  
>N5473  
AAAGCCAAAGCAAAAUAGAACUAAGGUUACAAAUACUCUU  
>N5474  
GCCACCAUGUGGUUGC UAGGACUUGAACUCAGGACCUCUGG  
>N5475  
AAAUAGGAACAAAAAGAGAACUGGAACUGUGGCUC CAGCU  
>N5476  
AAGAACUCUGUGAAGGGAGGACUAGGAGGGAGCAGGGAACA  
>N5477  
UUUACUGCCCAUUA AUUCAGACUAAA UCCUGUUGCUCUCCU



>N5478  
AGACUCUUA AUGUUCAGCAGACUCACAUACCAUAAACAUA  
>N5479  
AACUCACGAUGAUUUUCAAGACUCUAUUAUUCAUAGUAACU  
>N5480  
GGAACUAGAGAAGACGGGAAACUUUCUAAGUAAAGCAAACA  
>N5481  
AAGGGCAUCUCCUCCCAAGAACUGGCAACAGAAUAACACU  
>N5482  
GUAGGGAAAAGCAAAAUAAAACUGGUCCUAAGUAAGAGAGG  
>N5483  
AAGGAAAUCAAACUGUGAGGACUUACUGCCACUCCAGUGAG  
>N5484  
AAAAUAUUGUCACACCAGAGACUGUAGAUGGUUACAAUAAA  
>N5485  
CUGGAAAGCACGGAACUUGGACUCGGGCUUGACAUCCUGC  
>N5486  
GGCAGGAAAACCCAGGCAAAACUGCAGUGUGAGGAAUUGUG  
>N5487  
AUUAUAAACUAUUAUUAAAACUCUCCAUCUUUAACCGAU  
>N5488  
UAUUGUAUGACCUAGGAGAAACUGCAGAAACUGGCCAUACC  
>N5489  
GAGCUUGAACUCUGACAUGAACUUACCAUAGUGCAAUAGAU  
>N5490  
UCUGCAUUGGCUGUAAGGGAACUUUUCUUCUAGCAUAGG  
>N5491  
AGGAUAUCAAAGUAACCAAACUAUUUUUAUACCAACAUC  
>N5492  
AAGCUAGUGCUUGUCUGAGAACUUGUCUUGGCUAGGGGUGG  
>N5493  
UCUUUGGAAAAGUCUUGAAGACUCACAGCAGGAAAUAAUA  
>N5494  
AUAAGCACUGUAACAGAUAAACUACAUGUCAACUUGCUGG  
>N5495  
GACGUAACCCACCUGACUGGACUUCCAUAACAACCCUCAAGG  
>N5496  
GCUAAUUGUAAGCACAGUAAACUUUAUUGUUUCUGCCUGUA  
>N5497  
UAAAUUUCUAUUAAGAAAAAACUAUGAGAAGAACUGACAAU  
>N5498  
AUGUCUUUAUUUGACUUUAGACUGGGAAAGUAGCUGUAGUU  
>N5499  
UCUUCCCUAUUAUAAUCCAGAACUUAAGAUCUUGCUCUCUCU  
>N5500  
GUAUCAGCACUACUGCAGAAACUACUGUGGUUCCAGAAUC  
>N5501  
AAAAACAUGGAAACAUAAAAAACUUCUUAACAAAGAACACAA

>N5502  
AGACCACUGACAGUUCUCAGACUCAGAGGUCCAUAACGUCA  
>N5503  
CCAUAUGAUGUUUCUAAAAACUGUAUUUAAAAUUAAAGAG  
>N5504  
AUGUAGGAGUUGGAGAAGAGACUGGAGGAGCUGAUGGGUUU  
>N5505  
GUUAGAAUUCUAAAACAAGAACUUAGAUAAAAAGAGAUGAU  
>N5506  
UUGAGGUUAUGAUGUUCAGAACUACCACUCCUCUUGGUGG  
>N5507  
AGGGACCAUUUGAUUAGAAAACUUUUUUUCCAAAACUUUCC  
>N5508  
UUGUCUCUAGUAUUAACUGGACUAUGUAUCUCAGAUUAGAG  
>N5509  
GGUACCACCUGGUAACAGAAACUCCUUGCAAUAUAAUGAAG  
>N5510  
UAUCAGUAGAAUGCAAUGAACUGGAAACCCAGACUGAGAU  
>N5511  
ACAUUUC AUGAUGGAGCUGGACUUCUGGCCCUACUGAUUGC  
>N5512  
AGAAUAAUACUUUAAAAAGACUAUUUGUCAACAUCUGU  
>N5513  
ACUGUGUCAAGCUGACAAGGACUGCUAACCAUCACAUCUUU  
>N5514  
UAGAGGUGCUAAGGAAUGAAACUUAAAAAGCCUUCUAAUUU  
>N5515  
UAUCUUUUGUACAGUCCAGGACUAACUCACUGACAAUGGUG  
>N5516  
UCCAGUCCUGCUAGUCCAAAACUAUAGGAUCUCCAUGACAC  
>N5517  
UUAGAAGUUUUGAUCCAUAACUACUAAAAAGUGCACAUC  
>N5518  
CCAUAAGUUAGGCUGUACAAACUAAUGUCUGCCUGGACAUC  
>N5519  
CUCCAUGUUAAUACUGAAGACUGAGAAAGGGGACAAGUAG  
>N5520  
AUCCAGGGACACAAACAGAAACUUUACUGUUGUUGUUGAUG  
>N5521  
CUCCUUCUCUAGCUAAAAGAACUAAUAUAAACUGGCUGUCA  
>N5522  
GAGAGUUAGUGCAGGUAAGGACUACAGAAGGGGACAAAAGU  
>N5523  
AUUUCUACAACAGAGGGUGGACUUCAGCAUGGAUCCUGUG  
>N5524  
GUGGUAAACUCACCACCUGAAACUCUUCUCUGAAGGGCUGUC  
>N5525  
CACCCCAACACACCUGAAAAACUAGACCCGGAUUUAAAAGC

>N5526  
GUGACUCAAAAUGUGUACAGACUGGCCUUAUCAGAAUAGUA  
>N5527  
UAUGGGGUUCAGUGAUGGAACUCAGACCAUCAGACUUGCA  
>N5528  
UAAUAAAUGUAGUCUAAGAAACUUGCAAUUUGAAUAGGUAA  
>N5529  
GGAAUGGUUUGGUUUUAUUGGACUUAGAAUCCAGACUACAG  
>N5530  
GUGCUGUGUCCACUUGGGAAACUGGUUUGUUGGUUUCUAA  
>N5531  
UGGAAGGGACAAGAAUAGGAACUAACUAGUACCCCAGAGC  
>N5532  
CUUGAAACUAUUCAAUUUAAACUUACCUUUAUUAUUAUU  
>N5533  
UUUGAAGAUUUGAAUCUAAAACUCCACAAAGCAACUUCAUC  
>N5534  
GGAGUUCUCAUUGACUCUGAACUGUCCAAAACAAGCACUG  
>N5535  
GUUUAAAUGUUGCCUGGAAACUUCUGUCGAAAUGUCAUUG  
>N5536  
UGUGUCUAUAAACAAAAGAGACUUUUGUUCUUUAUAUUA  
>N5537  
CGCUUCAUAAUUCAGGUAAACUAUCUAGCCAGUUUACCCU  
>N5538  
AAAUCUGCCCCAGUGGUGAACUCCUCCAGCCGGUCUGUA  
>N5539  
CUCGGGGCAUCCCUACUCGGACUGAGCUCGGGGCAUCCUA  
>N5540  
CAUGAUGC UUUUAAUACUGAACUCCUGACUCCUUGAUUUAA  
>N5541  
AUAGAUACUAUGUAACCCAGACUAGCCUCGCAUUCACUGUG  
>N5542  
AUUUCAUUAUAGAAUAGGAACUCUCCAUUGCUGGUGGGAU  
>N5543  
GAGUGUGUACACAGUCCCAAACUUCAUACUGUUAUUGUACC  
>N5544  
AAUUAUUUCAACAUGAAGAAACUACUGCAUGUGAUUAAUUC  
>N5545  
AGACAAAGUUUGGAGCAGAGACUGAAGGCAUAUCCAUCAG  
>N5546  
GUAGAGACAGCUGGGUGGACUGCAGCAUUUUUAGACAGA  
>N5547  
AAGGUGGAGUUGUCAUGGGAACUCCUGUAAUGGAGUUUAC  
>N5548  
CCCUGGUAAGACCAUGGAGGACUUUCUCCCAAGAAGCCUG  
>N5549  
ACACACAAGAUCUAAUUGAAACUUGAAUUUGCUAUGCAGAC

>N5550  
UUGAUCAUUGAAAUUGGAAGACUGUCCAUGAAAGAUACUG  
>N5551  
CCUCAGGCCAUAGACUACAAACUGUGUGAGGUUGAAAUAAG  
>N5552  
CUGGCAUUGACAUCAGCAGAACUAGUCUGAUGCCAAAAGAA  
>N5553  
AAAGAGGCCAAGAUAAUGGAACUAGACAAUCAGCUAGUCAC  
>N5554  
AUCUGCCAGCCUCUGAGAGGACUCUCACCUCUACUUUGAGC  
>N5555  
CCUCACACAAUGUAUUUAAAACUUGAAAGUUUAAAUGUCA  
>N5556  
UUUAAGGUAUGCAGAAAAGAACUGAUCUUUGC UUAAGCAG  
>N5557  
UGGAAAUGUCCA UUGAGAAACUGAAGUGCUGUCAUCAUG  
>N5558  
UCUCCUCCUUUGUAUUGGAGACUGUAUUUCCAAACCCCGUG  
>N5559  
GGUGAUUCCACCUGCAUGGGACUGCAGGACUCCAGGAUUC  
>N5560  
AAUGUCUGAAGCCUGUGCAGACUAGUCUUGGCAGGAUCCAG  
>N5561  
AUGUAACGAGCUGGCCUCAAACUCACCACCUAGCUACAUA  
>N5562  
UUCUGUGCAUCUUCACAGAGACUAGUGAGGCAGGUAUUCU  
>N5563  
AUUUUUUCAGUGAGCCAAAACUCUCCUAGCCUCAUAGAU  
>N5564  
AAAAACUGAUUACAUAUAUAAACUGGCUAAAGAUACAAGUA  
>N5565  
UAUCUCUUCACAGCAUGGAAACUAUAAGACAGUCACCUAAU  
>N5566  
UGUUGGGAUGGGUAUGGUGGACUCAGAGGGAGAGGAUGU  
>N5567  
AAUAUGUUGGGAAACCAGAACUUGCUGUGGGGAGUACU  
>N5568  
GCUCCUUGUUUAUCCACAGAACUUUAAAAAAGAAAGUAGAA  
>N5569  
AGGAGACUAAGUUACCAUAAACUCUUCUCCUUGGGGCUGUG  
>N5570  
UCAGCCUCCAGAGUGCUUGAACUGUAGGCAUGUGUCACAGU  
>N5571  
CAGGGUCUCCUGUAGCCAGACUGGCCUCACAUUUGAUUAG  
>N5572  
UUUAGUGACAAAGAAGACAAACUAACUAACUAGUGGUUGAU  
>N5573  
AGAUCUAGAGGUGGGGGAGAACUGGAGGUAGAAAGACAGUG

>N5574  
GCAGAACUGUAGACGUGAAGACUGUGAGGGCCAGGAUGAUG  
>N5575  
AGGUACAGGUAUGCCUGUGAACUCAGCACACAACACUGGUG  
>N5576  
AAUGGUUUUAUUCUCUUGGAACUUCUCACAAUAAAAGUCA  
>N5577  
GAAGCUGACAGCUUCUGGGAACUGCCAAAGCAACACAGCUU  
>N5578  
ACACAAAAGACUCCUAAAGACUUUGCCUGAAAACUCUUAU  
>N5579  
AGGAAGAUUCUGACAGGUAGACUCCAGACAAGUGACUCUGA  
>N5580  
GAGAUGAUAGCAGUGUUGGGACUUUAUUGGAACCCAGUUCU  
>N5581  
AUGACCCUCUAUUCUGCCAAACUUCCUGUCCAUUUCUUUCU  
>N5582  
AUGAACAGAGGCCAUGGGGGACUACUGCUUACUGAUUUGUU  
>N5583  
UGCCCAACAGUUUCUUUGAAACUUCUCCUAAUUCUUUCAC  
>N5584  
UUGGUCAGCUGCUGGGUGGAACUUCUCAAGGAUCCUGUUC  
>N5585  
UUGUAACAGGACAAAAUGAACUGAAUCCUCCCUUCAAC  
>N5586  
AACAUACCAACAUCAAUAAACUACUUUAUUAACAGUAUA  
>N5587  
GUGUUUCCUCUUCUAUAAACUGUGUAAUUUGUACUUCU  
>N5588  
UUCUUUUUCCUGUGCUGUAGACUUUUGAAGUCUUUAGCCUC  
>N5589  
UGAGCUUCGUUAAAAGUAAAACUAUUAAUUUGCAGGCUGGG  
>N5590  
AUGGCAGUUGAAAGCCAGGACUGAAGGGCUC AUGCAGAGA  
>N5591  
AAAAAGGUGAAAAUAAAGGGACUUCUCAGGGAAGACAUGA  
>N5592  
AUGAAGGACUGCACCUCUGAACUGUGAGCCACAAUGAGCCC  
>N5593  
GUCCUAACUUCAAUAAAGGGACUGUGCUCUUGUGAUCUUCU  
>N5594  
GAGCCUGGGUCUCCCAUGGGACUUCAAUACUUAGAGAUGCU  
>N5595  
AGAAACAGCCAUAAAAGUAAACUGUUUUUCCAAGGGGUGCU  
>N5596  
UAUUUGCCAUUUGUCUAUAGACUGUCCCUACUGACCACUCU  
>N5597  
UUCUACUCUCAAGGAUAAAACUAAGAACUAGACUUUCCU

>N5598  
GGAGGCCAUGC U U A A A G A A A A C U G A C A C U C C C C U C C C U G U C  
>N5599  
G U U U G G A G G C U A U A A A U A G G A C U C C A U G G A G U G A C U G A G A C  
>N5600  
A C A G G G U C C C C A A U G G A G G A A C U A G A G A A A G A C C C A A G G A G  
>N5601  
U C G A A U U G A A G A G G U A C U A G A C U C A A G C A C C A G U A C C A A A G  
>N5602  
G A A U G G C A G A U A U G C A A A G A A C U C A A G C U A C A G A G C A A G A A  
>N5603  
G U A C A G G U G G C U A U U U A C A A A C U U U C U U U A G U U A A U U G G A U  
>N5604  
U C C U U C A G U U U C U G C U C C A A A C U U U G U C U C U G U A U C U C C U C  
>N5605  
G U A A A A A G G A G U C A U A U A A A A C U C A A G G G G C C C C G U C U C U C  
>N5606  
C U U G C U U G A A G U U G U G G A G A C U G G G U C U U C C G A C A U C A C C  
>N5607  
U G G A U C A U U C U G U A A A C C A G A C U G G C C U U G A A C U C A G A G A U  
>N5608  
C A G U C C C A A A G G C A C C A G G G A C U G C A G C U A A G U C G U A U G A C  
>N5609  
A C C A G C A U G C U G G G G U C G A G A C U C A U G C A C U G C G A A G G G G G  
>N5610  
C C A C A U G G U G G A A G A G G A A A C U G A U U U C U A U U A G U U G U C C  
>N5611  
C U C U G G A U C A C U C A U C U G A G A C U A A A U G A G G A G A A U A A A U G  
>N5612  
U C A C A U C C C U G A C A U A U G A G A C U U U C U A G U G G U U C U G C A A G  
>N5613  
C A A A G G A U A A A A A A G U G A A A A C U C C A A C A C A G G A G G G A A A U  
>N5614  
U C C U U U A C C A C A G G C C C A A A A C U G G G C A A C A G C U C U A A U A A  
>N5615  
U C U U U A U A A C A G C C C A U G G A A C U U G U A C U G A A A U A U C U U U G  
>N5616  
C A A C C U A A U C A A A A A A U U A G A C U U C G U C A A A A U U A A A A C U A  
>N5617  
C A C C C A A U C C U U C G A C C C A G A C U A C A U C A A A C C U A G C A G A A  
>N5618  
G G G C G G G G G G U C A C U U U U A G A C U U U G G A A G U C U C U C A G A A U  
>N5619  
A G U A A C C C A G U A A A A U C A G A A C U C U A G A A G C U U A U A A U A A  
>N5620  
G C C U G G C U U G U U G C C A G G G A A C U G U U G G U C A G C G U C U A G A A  
>N5621  
G C A G A U U U C A C U G A A A A A G A C U A A U A A U U U U C U U C U C U G

>N5622  
GGGCCUGUGGUUGUGACUGAACUAUAAAUUCUUCAUUUUCA  
>N5623  
CUGAAAGUAACAUGACCAGAACUUACACCCUCCACUGUGU  
>N5624  
CUGCUUUAGGGGUUCAGAGACUUAAGAGGUGGGACUAAGC  
>N5625  
AGUCAGGACUACACAGAGAGACUCUGUCUCCAAAAAACAC  
>N5626  
UUACAAGUAUUCGAAGUAGAACUUUUUAAAAAUAAAAA  
>N5627  
AAAGAAAAGGUAAAAUAUGGACUUAGAAAACCGUGCAUGUG  
>N5628  
GCUCUAGGUUCAAUUGAGAGACUCUGCCUUGGUGAAUAAGG  
>N5629  
UUACAGAGACACAGUUUGGAACUGAGAUGAAAGAAUGGACC  
>N5630  
GAGAGUGGUGAGCCAAGGGGACUUAUUAACCAGCUUCAA  
>N5631  
ACCAGAGCUCUGGGGUCGAAACUCAUGCACCUAGUGGUGUA  
>N5632  
CCUUUUGAUCAAGAUGUAGAACUCUCAGCUCCUCUAGCACC  
>N5633  
GCCUUGGUUGCCUCCCAGAGACUGAAAGUUAAGUCCCUGUG  
>N5634  
AUAAAAUAUGUAUGCAGAAAACUCAAGGAACAUCAAGGAGA  
>N5635  
UGAAUAUACCCUCCCUGAGAACUAACUCCAUGGUACCAGA  
>N5636  
AGCCAUCCUUUUGGCUCCAGACUAGCUCAUGCCCCACCUUU  
>N5637  
AAAGGUUAUAAGAAAGAGGGACUGUUUGUGUGUCUCCCAG  
>N5638  
GACCUCCUCCAACCACUAGACUGUGGGUGGCAUGUGACUUC  
>N5639  
AUUAUAAAUAAAACCAGAAACUAAAUUAAUUAACUAAAA  
>N5640  
UUUUCAUUCAGUCAGGAAAGACUUGAAAAAAAAAUUUUUUG  
>N5641  
CGAACCAAGAAACCAUCAAGACUGGUGCUGGUGAGGGCUGC  
>N5642  
UAAUGGACUAGACCUCUGAAACUGUAAGCCAGCUCCAAUUA  
>N5643  
GAUGUUCUAUCUCCAGCGAGACUGCACUACCUAAAUUUAUC  
>N5644  
UGGCUUCUUUCCUGGAGAAGACUUCUGUGGAGAGCUGAGGG  
>N5645  
UUGCUC AUGCUGUCAGAGGGACUUGUUCUCCUAGGGUCCUC

>N5646  
CUUAUUUAAAAGAAAAUAAACUGCAAAAGCGCAGUUAAGU  
>N5647  
CCGUAGGUUCUAAAGAGAGAACUCACUCAGGUCCUCACAAC  
>N5648  
UCAGUUUCUUCAGAACACGGACUUGUUCUAGAAUGUGUUU  
>N5649  
AUGGACACCUCUUUUGUUAACUCUGUAACUUAUGUCCUC  
>N5650  
GCAUCCAGGGUGGAAAGCAAACUGGAUACUAGAAGAACUAC  
>N5651  
UGUGAGACACACUGUGAAAAACUACAGCUCACCACAAGAUUU  
>N5652  
UACGAGAAGAAAAGAGUGGGACUAGGGUACAGCCUGAAAUU  
>N5653  
AGGCAAAAAAUUCAACAAACUGGAAUAAUUUUGUGCUGU  
>N5654  
AGAUACCCACAUCUGAAAAACUUUGCCAACAUGUGAGACA  
>N5655  
CCUAAUUAUAAUUCUACUAAACUCCCUGAUUAAAAGGAAAA  
>N5656  
UGGCCUCUAUGGGCACUCAAACUCACAUGUGCACCACUACC  
>N5657  
UAAAAAGGCUAAAUAGAAAACUCAAUUAAAAAACUUAGC  
>N5658  
UUAGUGACUGCAUUCAGGAGACUGGAGAGGCAGAUUUCAC  
>N5659  
AAGCAGCUUAUAGUCACAGGACUUCAGGAAAAGGAAAAUAG  
>N5660  
GCACUGAGAAGGGGAAAGAGACUUAAGUGAGUCCUACCCUA  
>N5661  
GAUAUUGACCUCUAAUACAAACUUACCUUGAUCUUCAUUG  
>N5662  
UCUCACAUGAAGAGACCUGAACUCUAUCCACUUAUUGCUAC  
>N5663  
UCUAGGAAUUAUAAGGGUAGACUACCCAGCUACGCUCAGCU  
>N5664  
ACCUCCAUAGUGGAUGCUGGACUCGGGUGUGUUGGAGAUAU  
>N5665  
UGUCAUAACUAUGAUACUGGACUAUUUGACACUUAUACUAC  
>N5666  
UGAGCAGUUUCCAGCCCAAACUGCAAUGUAGUUUAUAACU  
>N5667  
UGGACCGUGAAGCACCAGGAACUGACUAAGGUGCAUAAUUU  
>N5668  
ACAUUGUAUACAUGUGUAAAACUGUCAGAGUAAUUUUAAA  
>N5669  
AAGGAAGGAAGGAAGGAAAAACUAGCAGAAUCUGUAACCAA



>N5670  
CUUUGACAUCACUGUUUUGAACUUUGACUUUUUACAUUCCU  
>N5671  
AUAUCCAAAUAUAUAAAAGAACUCAAGAAAUCAGCCACUAG  
>N5672  
UUUCAAUUAGCACAACAAGAACUGGCUACACAACAAGAGUU  
>N5673  
GACGAACACCUGAUGAAUAGACUCUGCAGAAAUCCACAAAU  
>N5674  
AGGGUAUGGGAUCCUCUGGGACUGGAGUUAGGAACCCAGCG  
>N5675  
GGACAAGGGUCAGAUGAGAGACUGUUGACAUUGUCUGUGAC  
>N5676  
GACUAACGAGUGACCGUGGGACUGCUUCCUGCUGUAGAAGC  
>N5677  
GCCAUGGUGGAGGGAAAGAACUGAUUCCUGAAAGUUGUCC  
>N5678  
UUUGACCUUGACCCUUGAAGACUGGAGUUAGAGUCUUGCAU  
>N5679  
ACAGUUGGUUCUUUUUGAGAACUUCGAUUUCUUCACAUCU  
>N5680  
GGGAGGCCUUAUCUUUAAAAACUAGGUAAAGAGCAAUAGGG  
>N5681  
UCAAGCCUAGAUAGAAGGAAACUGAUAACAGCCACACAGGC  
>N5682  
GGCUAGUACCACUAGGCCGGACUAGACUGUGCCUCUUCAAU  
>N5683  
ACUUCUCCGUGGGAAUCCGGACUAGGAAUAGUUACAUCAAA  
>N5684  
ACGCGGUUAAGAACAUCUGAACUUGGUUUCCCAAUGACUC  
>N5685  
CUCUGUUGAACAGAGGAGAGACUUACCUACAAAACAAAGAU  
>N5686  
CCGAAAAGGUAUUCUAUAAAAACUUCUACUAGGAAGCUGCUU  
>N5687  
AUAUAGCAGACCCCCAAGAACUCACAAGAGACCAAACUUG  
>N5688  
ACACUACCUUAUUAUUUUGGACUCAAUUCAAAAUUUAUCUA  
>N5689  
UUUCCAGUCUGACCUGGAGAACUCAAGAUGACCCUGCACAU  
>N5690  
UUUUUUCUGGUUGCCCUAGAACUCACACUGUAAACCAGGCU  
>N5691  
ACCCACACAGGACAGCUCAGACUUAACGGGCUGCUUAUCUA  
>N5692  
GCUGGGAAUUGAGUUCAGGGACUUAGCCAUGCUAGGCAAGC  
>N5693  
GUAAUCUAGAUGGAAUAAGAACUAACCAAACAAGCAAAGA

>N5694  
UCCUCUGUUUACAGCUCAGACUUGUCUACCCAGGAAUGGU  
>N5695  
UAUGCCUUUCCCAAGUGCAGACUCUUAACUGCUAAUAAAGA  
>N5696  
UUUCCCUCUUGAAGGAAGAAACUGUUUUAGUGAUGCCCACA  
>N5697  
CCUCCUUUGAAAAAGUUGGACUUUAUGUCAGGAGGAACCU  
>N5698  
GCAAGGAUUUUCUGAAAAGGACUCAGGUCACACAGAUGCCA  
>N5699  
GGUUCAUGGCAGGCUUCAGAACUCCAAACUCUUCUGUCUCA  
>N5700  
GGUACAAUCAUGAAAGAAAACUUUCUUUCCCUUAUACUAG  
>N5701  
GCAACAUUUGUCAUUGC UAAACUCUUAGUUCUAAUGUGACU  
>N5702  
ACAGGCAAACUGUGAGUCAAAACUUCUUCACACAAUUAUUU  
>N5703  
UCCUGAACUUACAUCUGAGACUGAAUUACAGAGAAAGGGC  
>N5704  
AAUAUCAAAAAAGAGAAAAAACUGUGAGAUUUUGUGCAAGA  
>N5705  
GUUUGUACAUGUUAACUAAGACUUUGCUGUAGCUCUCAUGU  
>N5706  
AACAAAUGCCACACAAUGAACUUAAAAUCAAACUACACA  
>N5707  
UUAAAUAACUGGUUAACUGAACUCACUGAUGGAUUGGGGUG  
>N5708  
CACUGGACACCAGCCCGCAAACUCAAGCACUCAGAAGGCAC  
>N5709  
UAUGUUCUGGCAGGACUGAAACUCACUAUUUAGACCAGAAU  
>N5710  
UCUUUUUGGAGGCACUCAGGACUAUAAGUUUUCUCUAGG  
>N5711  
UCCUCCUGUGAUUCUGUAGACUCUGUCAGCAGUCCUGGGA  
>N5712  
UCUGUGCAGCACAGUCUAAGACUGCCUUGUAAUGGUCGGCU  
>N5713  
CCUUUUCACAGCACUGUCAAAACUUUCUCUCUGUCCCACACU  
>N5714  
AUCCUAUCACCAAUCAGGAGACUAUAAAAGGAUACAACUCU  
>N5715  
UGCGCUUUUAGCCUCUUUAAACUUAAUAAGGCCACAAAAA  
>N5716  
ACUACAGAUGUUGCCAAGGAACUAAACUGACC UAAAAUAC  
>N5717  
GGGUCGUGAGAU AUGGACAGACUGAGCAACUUGAAGAGAAG

>N5718  
CAGUCCCCAAUUUUUCUAAACUUAUUUGUGCUAGUUUUAG  
>N5719  
CGAAGACUCUUGAUUUACAGACUUCUAAUUCAGAGCUUACA  
>N5720  
GACCUGCCAGUGC AAAAGAGACUAGGCCUCCUUCGUGGGAU  
>N5721  
UCUAUGGACAAACUAUCCAAACUUUUUCUUAUUUAUUUUUCC  
>N5722  
CAGUCCGGGUGCUGCCGAGGACUCUGCCGAGGACUCUGCUA  
>N5723  
UGGAAAGGUGGGGGUGAGAGACUGGAGCUCAUGGCGGAGCA  
>N5724  
AAAAACAACAACACAGACAAACUAACCAACAGCCACCCUCC  
>N5725  
UCAGGGCUGUCCUCCUGGGGACUGAGAAGAAGCCCGAGCAG  
>N5726  
AGGCUACACUGGCCAAAUGAACUUUUGCCAGGUUCUAUGCU  
>N5727  
UGCUGGUCUCACUGCCACGAACUCUAUGGAACCAUGUUUUA  
>N5728  
UUGAAUUUUUAUAGCAACAAACUGAAGAAGAAAAACAACCU  
>N5729  
GCUCAUCUUGAGGUGUGGAGACUGUAGAGUUUGGCAGUUUG  
>N5730  
CCGAUUUAUGGCGCAACUGGACUGCAACUCGAGCCUCUAC  
>N5731  
CUGCUUGGAUGCAGGGCAGAACUUCUCCAGAGUUCUGUCA  
>N5732  
UUUUUCAUUUAUUAAAAUAAGACUUCAAAACACCAAAGGCAA  
>N5733  
AUAACCUUAAUUUAAUGGAGACUAGAAAUAUUUCCGCAGAC  
>N5734  
AGAGAGAAUAUUCUGGUAAGACUGGAGCAUUAACUAGAGA  
>N5735  
ACAGCAUUCAGUCACAAUAAACUGAACAGUCUAGGGUGCUG  
>N5736  
UCAUUAAAAGAAAAACAAAGACUGUCUGUCUGUCUAUUCUU  
>N5737  
CGAGUUCCUCCAGGUAGGGACUUUCUAACUCAAAAGGGAC  
>N5738  
CUGACCUCUAACCCAGUUAAACUUAGAACCUACUUUAGCAA  
>N5739  
GGCAGAGAAAAUAAUAUAGGACUGCAGAGCUAAGUACUACA  
>N5740  
GGGUAGUUUCAACUGCACAAACUGAAAGUGUGCCUCUCCC  
>N5741  
CCUUUUUCAUAUCUGGGAAAACUCCUCCUGUUAGUAAUCUA

>N5742  
AACUGAUGCACAUAUUAAAACUGCCUAAAGCCCUGUUCUA  
>N5743  
GAUUUGCCUGAAGAAAUUAAAACUUAGUAAGAAUACAACUUC  
>N5744  
CCAAGAGAAAGGACACUUAAAACUAUGCACGUUUUCUGAGAC  
>N5745  
ACAUAUCUGACUGGUGAGGAAACUGUGUGCUCCUUACCAGUC  
>N5746  
AAUJCCCUGUCCACCAGAGAACUGGACUUGAGCUGAGUCAG  
>N5747  
AGAGCUCACCCAAACCCAGAAACUUUCAGCAAUAACAAUUUG  
>N5748  
CCUACACCUUCCUUACUGAACUUGAAGCUCAGAUACUUUG  
>N5749  
GUCUGCACUAGGAAUACUGAACUUACCUCAUCUGGAAGGUU  
>N5750  
GGAUUUAUCUUCAGGCCAAAACUCAUCAGUGUAAUCUAUG  
>N5751  
GUAGUCUUAGUUGUCCUGGAAACUCUGUCUAUAAAGCAGGUU  
>N5752  
CUUAAUGGCACAGAAUAGAAAACUAGUCUUUUCAUAUAUUCA  
>N5753  
AAGUUCUGGUCCAUGAAAGACUCAGCUAUAUUAAAAAAG  
>N5754  
AUGCAUGCGCUGGGAACUGAACUCAGGUCCUUGUGUGCUCU  
>N5755  
UGGGGUGGCCAGGAUCUGAACUCUGAGAGCAGAGCACAUG  
>N5756  
UUAAAAAAAAAAAAACAAACAAACUUGCCAACAUGUCUUAUG  
>N5757  
UAAAUCAAAAGCAAUGAUAGAACUGACAGAGUCACCCAGCAG  
>N5758  
ACACACAGAUGUCUACUGAGACUGCUGGGAGUUCUGGAUUC  
>N5759  
UAAUGAAAUAUGUUACGAGACUAAGAACUCUGAGAGGCAA  
>N5760  
AGGGCACAGUGAGCUGAUGAACUGUAUAGCCUCCAACAGAG  
>N5761  
CUGUAUAGCCUCCAACAGAGACUUCUGUUAUUUCUCUUU  
>N5762  
GACAGGAAGGUGGAGGGAGGACUAGUAAGUGGGAAGAGGGA  
>N5763  
CAAAGGCUGCUCUGGGAGAACUGAAUCAUACAAAUGAGGA  
>N5764  
GGCAAAAUAACUAACAGAAACUUAGACAUAUCCAGAAGA  
>N5765  
UAGCACGCCCCACAGACCAAACUUUUAGAGGAAAAAAAAAA

>N5766  
CCACCUGUGCUGGGACUUGAACUUGGGUCCUCUUCAAGAGC  
>N5767  
UUUCCUGAGGCUGAAGGAGAACUCUUCAGACAAGAACCUCA  
>N5768  
UGGUCACACUAAGUAGGUGAACUGAAUCUUUUGCCUUUUUU  
>N5769  
CAUGGGUUCUAGGGAUUCAAACUCAGGACCUUGUGCUUUCU  
>N5770  
CAUAAUCCCUUCAAGUAAGAACUUUAUUCAAUUUUCACGUA  
>N5771  
GGCUCUUCAAAGAGUCCAGAACUCUAAAUGAUACUGAGCUG  
>N5772  
AUCAUCCUGACAAGCAGAGACUUGCCAAACAAGAAAGGAG  
>N5773  
AAUUUAGCAAAAGCCCAGGGACUUUAGAUCUCCUCCCACAAG  
>N5774  
ACAUUUUUAUUCUUGUAUAAACUAUUACUCUUCAAACAAC  
>N5775  
CUGCACAAAGCAGCUAAUGGACUGGUACAAUCCGGGGAUGA  
>N5776  
CUCUGCAGUGAAGAGCACAGACUGCUCCUGCAGAAGAUCCA  
>N5777  
ACAGCCUGACGAUGGCUUGAACUCUUGACCCUUCUGCCUCU  
>N5778  
GAGCUGAAGAGAACUGGGAGACUCUGAAUGAGAUUCUGGAA  
>N5779  
CUAUCUUGUUGCCCCUAAAGACUGUUUCUUGUCAUUUAUCU  
>N5780  
UGAUCUUUUGUAGGAUGGAGACUAGAUUCUAUGUGUCUGUG  
>N5781  
CAAUAUUAUUAUACAUGAAACUUCUAGUCAUUUCAAAGU  
>N5782  
CUAUCCUUGAGUGAGAAAAACUCUUAUACUGAGAAUUCU  
>N5783  
GAACAAGCAACUCCAUGAAGACUGAAUGCAGUCUGACAGUU  
>N5784  
UCAACAAAACCAACUUCAAAACUAAUCUAUGUGAGGAAAAC  
>N5785  
UUUUGAUGUAAAUAACUUAGACUCUUUGAAAAUAAACUAGA  
>N5786  
UGUCCCCAAGCCCUGAAUAAACUCAGUUCUAUACUAUUUA  
>N5787  
AAGGAGUGAGCAUCACACAGACUCUGUCCUUGCUCUUGCUC  
>N5788  
UUCUGUGACGAGGAGAUGGAACUCCUAUAUCAUCUUACCU  
>N5789  
CUAUUCUUAACUUCUGAAACUAUCAUCCAUCAUAGGG

>N5790  
GUGAAGGCACAGAGAGGCCAAACUGUCUAAGUCAGGCAUCCA  
>N5791  
UCUGGAUACAGAGAGGGAAAACUGGGUUGGGAGUCCUCUGU  
>N5792  
CAGAGCAACUCCUCACCGAGACUCUCUGCUCAGAAGAUUCU  
>N5793  
CAAAACACCAACAUA AAAAGACUGUGAUGUGGCUCAGCGGA  
>N5794  
AAAAAAAUUAAAAGCAACAAACUGAAAGUCACAAAAAUCAC  
>N5795  
AAGCUGAAUUCAGAAACCAGACUUCUGUCCUGUUUCUGGU  
>N5796  
UAGAUACAUAACUAUAUGGACUUUCUGGAUGAACUCCAU  
>N5797  
UCAAAAUUGAGAAGAAAGGAACUAAUUUGGACCAAGUUUUU  
>N5798  
CAAGAUGAAGAGAAUAAGAGACUGUGGAGAGCCAGCUCUA  
>N5799  
CAGUUGCAUACAACAUAGGGACUCUUGGGAGGUAGAGAGUC  
>N5800  
GGGGCAAUUUCAAGUGUGAACUGUUGAUUUAGUCUGCCCA  
>N5801  
ACAUCCUGAUUGUCCUGAAACUUGUUCUGUAGACCAGGAC  
>N5802  
AGUUGCAUGGUUAUACAGAAGACUUCAAAAACAAAACCCAC  
>N5803  
UGGUCUGUAUUGAACUUGAAACUCAUUCUGGUGCUAAGCAU  
>N5804  
GUAGCCUUAACUUGCCUGGAACUCACCAUGUGUGCGUGUGU  
>N5805  
UUUACAAGGAGUGCCUUUGAACUACGAGGGAGAAGUGGGCA  
>N5806  
GUUGUUACUUGGGAGUAGAAACUUAUUAACAGAACACCUG  
>N5807  
AUGAGACUCCAUAAGGAAGACUCAAGAUUAAUUUUGGAGA  
>N5808  
CUUGUAAGACCUCAGUUUAGACUUCUCUAUUAAGGAAGUUG  
>N5809  
CUAUCCCAAAGUCCCCCAGACUCUCUCCUCCUCCCCUCCC  
>N5810  
CGACAAAAGCUCUAACUGAGACUGUCCUUCAUAGCCACCGU  
>N5811  
CCAUGAUUCUUUCAGCAAGACUGAGUUAGCAAUUCUGAUG  
>N5812  
AUUAAAAAUUAGUUUUUUAACUAGAUUAUUAUCCUAGGAGU  
>N5813  
AAGAGGGAGAAUAUAGUGGACUCUAAUUCUUAACAAGGACC

>N5814  
AAGAACUCUAGAAAAUGUGGACUGGUUGCUACCUGGGAGGA  
>N5815  
UCUCUGUGGGCACUGCAUGAACUCUAUAGCCAUACUUGUAG  
>N5816  
CAUGGCAGGACAUAGAGGAGACUAAGGGAGAACACUUAGGG  
>N5817  
AGUUUUUAUUUUGACAGAGGACUGAAUGUGAUGGUCUGCCC  
>N5818  
CCUUUUUCUAGAAGUUUAAACUGCCUAAGUACAGCAUGCA  
>N5819  
AAAUUUCUGACAGGAAGAAAACUUGGGGGAGGGCCAACCUG  
>N5820  
UAUGCAUGCUAACCACACAGACUUCUGUUGUAGUACACCCC  
>N5821  
GCUUCGGGUCAGGAUGUAGAACUCUCAGCUCUUGCAGCACC  
>N5822  
AGGGCCAGCCUGGCUUACAGACUGAGCUCCAUGACAGUCAG  
>N5823  
CAUCUGCUCCCAGAAGCCAAACUGUAACAAGAUCCACCAGU  
>N5824  
AUAUUUCAGGCUAGCCUCAAACUUGCUAUGUAGCCAAAGAU  
>N5825  
AAAUCAUCUGAAAUUAUAAAACUGGAGGAAGGGAGGAAGGA  
>N5826  
AAGCACGGGCAGUUUUGGGACUGAAGAGAUUGCUGGCUC  
>N5827  
CUUGUAUGACCCUGGAUGGAACUCACUCUGCUGGUGGCGAU  
>N5828  
UGUUGCUAUGAAUGAUUUGAACUGUGCAGAUCCUGGACCAAG  
>N5829  
ACUUGUUUUUAUCCCAUGGAGACUCUGACUCAGUGCUCCAA  
>N5830  
GAGACUCAGGAUGACCUUGAACUUGUUAUGUCAUGAGUAAU  
>N5831  
ACCUCUGUAUGGGUAAUGGGACUUGAACUGGCAUCUUUUGC  
>N5832  
GGAUGCUGCUGUAAUUAUAAAACUCCGAUGGCAAUCCUGAGC  
>N5833  
GCAAAGCAAGCUGGCCUUGAACUCACAGAGAUCACCUGCC  
>N5834  
UAAUCUAGGAGAGGAUCCAAACUCAAAACUAUUAAGGCAU  
>N5835  
GUUAUUCUUCACUGAAAUAAAACUGGUAGGUGCUAUUCUAUG  
>N5836  
AUCUUUAUUGUACUAGCUAGAACUUUGAGUACUGUAUUGAAU  
>N5837  
UAAGUAUUCUAUAAUCUAAAACUUAUACAGUAUACUAUAA

>N5838  
UAGACAAAAGCUGGCCUGAAACUCACAGAGUUCUCCCUGCU  
>N5839  
UAUCCUGUGGCCUGGGAUGGACUCCAGUGUUUUGUAUAUCU  
>N5840  
UAUAGUCCAAAAGUCAGAAGACUUGGCUAAUAGAUCCAUUC  
>N5841  
UGUUGUGUAGGCUAUCCCAGACUGAAUCACAAGGUUUAAAA  
>N5842  
UGUGUACCUAUAUCCCGGAACUCCAGAGAUAGAAGGAAGC  
>N5843  
CCUAGGAUUCSCCCAGGAGACUGCCUCCUUCAGUUCUCCU  
>N5844  
GGGCUUGCUGUGAACUCCAGACUGACCUGAAGCUUCCUGAA  
>N5845  
GAUGAUUGAGCCAAGUGUGAACUGUAAGUGUGAGCAUGACG  
>N5846  
GUAACCCAGGUUGGAUUGGAACUCAUCGCAAUCCUCCUGCA  
>N5847  
GACCUGGGAUCAGCUUUGAAACUAAACCAGAAAUACUCAG  
>N5848  
UGUGCUIUAGCCACCUCAAACUUCUGAUUCAUUGCUGCA  
>N5849  
UGAGGAGAGUUACAGUGAAACUAGCCUAUAGAUUCUGAGU  
>N5850  
CACGUCCAUCUGACGGCAGAACUGUUGGAAUUUUUGAGACG  
>N5851  
GUUAGUCUGGUUGGCUUGGAACUUGCUGUGUAGACUAGGCU  
>N5852  
ACCACCUUGGCUGCCCUGGAACUUGCGUUGUAGACCAGGCU  
>N5853  
UGUAUGUAGCUUAACUGAAAACUGACAGACUUGUCAUAUAA  
>N5854  
GCAGAAUGGAUAAUGUGCAAACUGCACAGAGGUAAGGCAGA  
>N5855  
CACAUCCCUGAAGCUUCAAACUGUUUAACUUGAGGUGUAU  
>N5856  
GAGACAUAAAGGAUCCUGGGGACUCACUGGCCAGCCGACCUG  
>N5857  
AGAAAUGCAUUAUUAAGAACUCUUAACUCCAGGAUAAU  
>N5858  
CCCAUGAGGAGAGAGUGAACUAUCUCCUGUAAAGAGCCC  
>N5859  
CAUGUGUCUGCUAAUACUGAACUUCAUUGAAAACUAGUCUA  
>N5860  
GUCCUGUUUACCAUUUAAAGACUGUGCCUUGUCGCCUAACC  
>N5861  
AAUUACAUAUCGUUUUGUGGACUGAGAACAACUAGCAGAGCU



>N5862  
CUGGAGGAUCAGAGAUGGGAACUAUGAAAAGUUUGAUCUUG  
>N5863  
GAGUUCUGCACCUUUAGUGAACUAGUUCUUUGGGUAUAACC  
>N5864  
AUAAGACUUUAAAAUGGGAACUUUAUGCCCUGAAAAGCUA  
>N5865  
GACAGUUAUUUAUAUAAGAACUUGUACAAAUUAUUUAUC  
>N5866  
UGUGUGUGUGUCCAGCCAGAACUUCAGCUCACCUGGCCAGU  
>N5867  
GAGAUGGAGUUAAGUACAAAACUCUAAAUAUAUCAAUAUAG  
>N5868  
UCGGGGGCUUGAGAGGAAGAACUGGGACUCGUUUCUACAGG  
>N5869  
GAGAGAGAGAGAGAAAGAGAACUUCUGAAAUUCUUCUCUAC  
>N5870  
AGGUCAUACAGAUCUGCCAAACUGCCUAGGAAUACAGCCAA  
>N5871  
CCUCAAUAAAGCGUUUGUAAACUGAAUCUCAAACAUGUUC  
>N5872  
GGACUAUGUAAACCUUGUGGACUGGGUAGGGGUUUUUGGGU  
>N5873  
UUCUCCGUCUACCCAGAAGACUGGAUGUAUAGAAAUUUAG  
>N5874  
CACCAUCCCCCUGCAGCAAACUGAGGGGAAGGGGUAUCUG  
>N5875  
UGUCCAAUUGGUGCUUGGGGACUGAAGCCACGACUCUGUGC  
>N5876  
CUUUUUUUUAUCCCUCAAACUCAUCCUGUAAGUACUAU  
>N5877  
UAAGUCUCUCCAGCUCUGAGACUGCUUUCUUUCCCCAGCU  
>N5878  
CAGGUGACCCUCUUUCUAAACUACAAUUGUUCUGGGGGUU  
>N5879  
AUCACAGCAACAGAAACGAAACUAAUACAGGAAGGCCGGUG  
>N5880  
UUAUUUUUAACAAUGAAAAGACUUGGCAGUUCUGACUUUCU  
>N5881  
AAAGCAUACAAAGUUUGCAAACUUUGGACAGAAAGUAAAGC  
>N5882  
AACUGAAUUGUUUCUAAAGAGACUUAACCUGUUAGAACAAAG  
>N5883  
GUCAGAGGCAGUAGAGAGAAACUACUAUUGCUAUUUUACUA  
>N5884  
AGUCAACUGUCAGCCUACAGACUUUCUCUAGUCAUAAGAAA  
>N5885  
AGUAAAACCCUAACUAAUAAACUUUAGAGAUUGAAAGUUAA

>N5886  
UGUGGAAGGAGAACAUUUGGACUCUCCUUCUCCGUGAACA  
>N5887  
GAAAGACUUGGAUGAUAAAAACUUCAAGAUAUUGAAGAAAG  
>N5888  
AGUAAAUAGGACCUCAUGAAACUGAAAAGCUUCUGCCCAGC  
>N5889  
AAUUGAUAAAAUAUGUAAAACUUUAAAAGGGAAAGAAAA  
>N5890  
AUGAAGCAAAAUACAAUGAACUAACCUACUAAACCAAUAC  
>N5891  
AAGGUCCAGCUCUAGAGGAAACUGGGAGGAACAAUGAUGAU  
>N5892  
UCUACAGAGGCCUUAUUGGGACUAACAUAGAGAAUAAUCAA  
>N5893  
GGCCAUGUGCUACUUGAAGGACUAAAGAUGCAACACUUAUC  
>N5894  
UACACUUGGAAAUUCUGUAGACUGUUUUCAAUGCAUCAA  
>N5895  
UAACGAGGUGAAUGUUCUAGACUUCCAUCCUACAUUCCGGA  
>N5896  
UGGUACUUCUAUUCCUAAAACUGUGUACACUCAAUUAUU  
>N5897  
ACACACACACACACACAGACUGGAUAUUGAUCAUAUCCU  
>N5898  
GGAAAGAAACUGAACAAUGGACUGGGGAAUGAGACAAAGAA  
>N5899  
AUGGAUCUGGCUUGGACUUCAUUUGAGGCUAAAUA  
>N5900  
GACUUUCAGAUGGUCUCAGGACUCUAUGAACAAAAUGAUC  
>N5901  
UAACCUUCUAGAAGGCUGAACUGCUUUGGAUGAGCUAUUA  
>N5902  
UUUAGAUUGAUUAGCUUAGACUCAUAUUGGGAAAUUUG  
>N5903  
CCUGUACCAGACACAUGCAAACUCAGGACUGAGAAAUCCC  
>N5904  
UCCUUUAUUCUUUAUGGAACUUAUCAGGGUGGCUUGGCC  
>N5905  
UGGGCCACAGUGGUGCCUGGACUAGGGUAGCUCAGUGGUAG  
>N5906  
UCUCGGAAGAUCGGGAUCGGACUCUUGCUGGGGCCCGGGUG  
>N5907  
AGACAACUCGAAGGUUGAGGACUGACUGCCUAUGAAACGG  
>N5908  
CUUGAUGCAUACUUGAGGAAACUCCCGGGCUCUGCUAUGUG  
>N5909  
GGAGCUUGGUUCUAGGAUAGACUCCCAUGACAGAGGAGCAA

>N5910  
GUGCUGGUUGAUUUCUGUGAACUUGACACAAAUCUAGAUAU  
>N5911  
UUUAAGUCUCCCACCCUUGGACUAAUUAAACCCAGGCUUUUA  
>N5912  
CAAACAAACGUAAUCAUUAAACUUUCCAGGAUCCUGCUG  
>N5913  
GGCAUAUUUUGUAGUGAUGAACUAAUUGUAAUUUUACAGAUG  
>N5914  
UUUUAGUGCCAGAACUGUGGACUGCCUUCUAGGGAAGUGUG  
>N5915  
UGAAGAAAGCCAAGAAGGGAACUCAAGACAGGAACCUGGAG  
>N5916  
UCCCCACUUUGAUGUGCAGACUUCUAAAAGGAGGCUUUCU  
>N5917  
UGAGGAAUACCCCAGAUAAAGACUGGCCUGCAUCCAUGCCUA  
>N5918  
AGUUUUCUGCAAACCACGAGACUGCAAACAUCUCCAGACUU  
>N5919  
AACCAUUUAUUCUUUUAAAAACUUUAUUCAGACAACAUGAA  
>N5920  
CUUUAUUCAGACAACAUGAAACUUACCUAUGUGGGUGAUGC  
>N5921  
GGAAAUUAUAUCUUGUAGGACUCUCAUUUUACCAUGAUAU  
>N5922  
GGAAGAGCAGGAGAGGAGAGACUCCCAAUUUUUAAGGAGAA  
>N5923  
UCCUUGCCAAGCUUAUAGGACUCUUAAGAGAAUUAGCAUA  
>N5924  
GGGAACCCUGUGAGAAGGGACUGUAUGUGCUUCCCAUGGG  
>N5925  
CAAAGGUGGCUGAGGUUGAGACUCAGUGUUAGGACACUUGA  
>N5926  
GGCAGAAAGCUUUUGGGGGAACUGAGGAAGUUCUACUUUGA  
>N5927  
AUUUUCUCUCCCUGCUCGGAACUUUCCAGAUGCCUCGGGC  
>N5928  
AUUCCUCCUUUGAUCCCCAAACUCCUUUCAAUUUUAUUCGAG  
>N5929  
ACUAGGACUUUCUAAUCAGAACUGUAUCUCCUGUGUCUAU  
>N5930  
AACAAUUUUGUGGGCUUCAGACUGUUGGCUGAAUGAAUUA  
>N5931  
CCUUCUGAGAGAUGUAGCAGACUUUGUUAUGUAGGACAGAU  
>N5932  
GUGAGAAGUAUUUAGACUAAACUUCUGGUUUUGUUGAUGGA  
>N5933  
AAAGAGGCCAGCUUCAAAAGACUACACACAGUGAGUGGUUC

>N5934  
ACCCAACAAAUAAAUAAGGAACUAUUUUUAUCAGCCUAACCU  
>N5935  
GCAGUUCAGGUUCUAAUGAGACUCUGGUUCAGACAGUGUCA  
>N5936  
CCUACAGGGAGGAAGCUAGAACUGCCUGUCUACUGAAAGGG  
>N5937  
AUGGGCGUAUUCAUAUGUGGACUUUUACCAGAAUUUAUAGG  
>N5938  
UUUGUAUGUGUCUUUCAGAACUACAGUUUUGCACUAGAA  
>N5939  
AAACUCUCCUUCACCCCAAACUGGUUUUGGGUACUGUUCU  
>N5940  
UGACUUAAGCAAACAGACAAACUAACAUGAAGUUGUUUCAC  
>N5941  
AAUGAAGAAACAUAAGGAAACUGAAUGAUUUUGAUCUUGU  
>N5942  
AUUCUAGGGUCUGAAUUAAAACUAAAGAACAGCUGGAAAAG  
>N5943  
UUAUAGCAGGGCUUCGGUGAACUUAGAUAUCAAGAGAGGAA  
>N5944  
AGAGGGCCAGGAGACCUUGGACUGCAAACCCUGAGGCAGUG  
>N5945  
GUGGCACUCUGUCCUGCUAAACUAAGCAGUCUCCUUUGCUG  
>N5946  
UGUAUCCUCCACAAAACUGAACUCUCCCUGUGGCAGAGAAU  
>N5947  
GUGGCGGAUCUGCCACUCAAACUGACAGCCUCCAGCUACCU  
>N5948  
AAUAGGUCUCCUGGAGCUGGACUUACAGAUGAUUGUGGGCA  
>N5949  
UCCUUUAAUGAAGCUAUUAGACUCUUAAGAUUGGAAGCUUU  
>N5950  
ACUGGAGGAGAGAAAGCAAGACUUUCCUCCUGUGCCCUUA  
>N5951  
UGGGCUUGAAAGGUAGUAGGACUUAGACGUGUCUCUGGGGG  
>N5952  
GCCUUUAAUUCAUAACAGAAACUUUUACAGUACCUUUUUUG  
>N5953  
AGAUGGACAGAUUAGAUAGACUUAACCAGAGUUGAUCUAC  
>N5954  
UAUCAAUAAACGAAGAAACAGACUAAAAAAAAAUACACAGUU  
>N5955  
AAAUCCAUAACAGAGUUAGAACUAAACAGACAAUGAGCUUU  
>N5956  
AGAUGCUGCACAGCUGUUGGACUAAUGAACUCACAGCAACU  
>N5957  
CCAAAGACAAUAAAAAGAAAACUGAGAUGAGAGUCAUGCAA

>N5958  
CAGGUUAGUUUUCUAGAAGAACUGUUAAUGUGUCCAUUACA  
>N5959  
GGCUGUAAGCAACUCUCAAACUGUGGUCGUUUUAACACG  
>N5960  
UCAAAAUUACCAGGAGGGAACUGGAGGGUUGGUUCAGAGG  
>N5961  
AAUACACAUAAAUAAAACUAAAUUUAAAUAAGACU  
>N5962  
AAAAUCCUAGGCUGUUAAACUGGUUUUUAAAACUUAC  
>N5963  
UCAAGAAAUUCCCCAAAGACUUGCCUGAAAGCCAGUCUC  
>N5964  
GGAAGCAGAGCUGACCAGAGACUAGGGUGUGCUUCUUCUUG  
>N5965  
UUCUGUCUCUACCUUCUAGAACUAAGAUUAUAAGCAUUUGC  
>N5966  
UUGAAAAGAUUAUAUGAGAACUAUGUGAAAACCACAAGCA  
>N5967  
UUCUUCAUUCUAAAAGGAGAACUUAUUGGGGUUUUAUAGCAG  
>N5968  
CCAUGAAGACUCUAUUAGAACUAACAGAAUUUGAAUUUU  
>N5969  
GUUCUAGAUUCCAUGAGAGACUCUGUCUAAAAUAUAAGG  
>N5970  
UAGGUAGAAGAACGCUCAAGACUCAACCGACAGAGUUCACC  
>N5971  
GCAGUUCAGACAAUAGCAAACUGAACCUGUUCCAGGAAC  
>N5972  
GGUCGAGAUGCCACGCCAGAACUCGGAUCCCACCUCAGAAA  
>N5973  
UACUUAGCCACUCUUUAAAAACUUGAUCUGUAUAAAGCUAG  
>N5974  
CUACCCUCUCAGUUUACAAACUAUUUGGUUAGUAAUAUGU  
>N5975  
UGAUGACAAAUAUUUGAGAACUUAUUAAUAACUCCCUGAC  
>N5976  
AGAGAAAGAUGAUCACAUAGACUACAGUGAAAAGUACCUUU  
>N5977  
UUAGCCAAAGAAUUACGAGAACUCCGCAUUGAAGAAACAAA  
>N5978  
GCUGUCAGUGACAUACCCAGACUAAUGUAAGAAAUGUUUGU  
>N5979  
UUUUGCUAACAAUACCACAGACUUUGUUCACAGAACAUGGU  
>N5980  
GGAACAAUCUCCUACUUAAGACUGGCCAGAAUUGGCAGGUU  
>N5981  
GGCAGUCCCACGACUGGGAGACUCUCUGAAGCGAAUGAAUU

>N5982  
GGAGCAAAGGGAUUACAAAACUAGCCAAUAAAUGUACUG  
>N5983  
AUUCCUCUGUUAUGGAUGGGACUUGAGAAUAGUAAAAUCA  
>N5984  
AGAGUACAUAGCCAUGCAGGACUUCAUCCACUCCCUAUAAGA  
>N5985  
AGUCACUGUACACGUUUGAAACUGUGACCUGAAGCGUUGGU  
>N5986  
UGACUUGACAACCAUUGUAGACUCUCCUAUGCACUUAGAGC  
>N5987  
GGCUUUGACAAAUAUCUAAGACUCUAAUCAUGUUAUGUUCC  
>N5988  
GGGACUAUUCUGAGUUCUGGACUAGGGGAAAUCUGUAAUC  
>N5989  
AAACGGCAUGUUUAAAAGGGACUUUCCAUUUUGACAUUUUA  
>N5990  
GGCAGAUCUCCAGUCUGAAACUUUUUAUUUUAAGUAUGCU  
>N5991  
UUGAAAUCAAAAUGGCAUAAACUAUGUGGUAAUUUUAGUU  
>N5992  
GAGGAUUCACAAAUGUCCAGACUUCUAUCAGGACAGGAAUA  
>N5993  
AUAGUCAGCCUCAAGAGAAGACUUUGGCCAAUAAGGGAAUA  
>N5994  
GUGGAUCAGGCAGGCCUUAACUCACUAAGUGCUGGGUUA  
>N5995  
CUUAUGUUGGAAAGCUUUGGACUUCCCUCUGUUAAGAGGAA  
>N5996  
UCACAUGCACAGAGUAGGAGACUAUGAGUGUGCACUUCU  
>N5997  
AUCUGGGGAAAGUUAACAGGACUCAAAUCAUGAAAGUGGAU  
>N5998  
UACACUCCUGAAAGUCCAGACUUGUCAGGACCUGAGGGCU  
>N5999  
UUAGCAAUAGAAACUUAUGAACUGCCUGCUGAGCACAGGGC  
>N6000  
CUCCUGGGAUGAAGAGGAGACUGAAGGAUCUGCUCACAU  
>N6001  
AAUGACUUUCCAUCCCAAACUCCACAAUCCUCCAAAAG  
>N6002  
GCAUCUGGUGACUUUGAAAAACUGUAGAUAAAACUAGCUG  
>N6003  
UACCAAUGAACAGUGUCCAAACUCACAGGACUGCAAGGAUU  
>N6004  
UCCAGGAUUUGAGUGGGAGACUCCCUGCCUGAGGCUGGCC  
>N6005  
AAAGAACUUGUGUGGGUGGACUGUUCUCCAUUUGAACAU

>N6006  
UUAGGGUCCCCACAUAUGAACUCUAUUGCACCCUUAUUGUC  
>N6007  
ACUAUUACACAUAAAAAAAAAACUAAAAAAAAAAAAAAAAAAAA  
>N6008  
CUACCUAAGGGGUACUGGGAACUGAACUUGAGUCCUCUGCA  
>N6009  
GACAAAAGAAAAACAUUAGAACUAGGUUAUUAUUGUGUCUAAU  
>N6010  
UACUCUUACUCUAUAAGAGACUAUAGCUUUUAUAGGUAGC  
>N6011  
AAGGACAAAGCUGCAUAGAGACUAUAAUAUUGUUCUUUGC  
>N6012  
UCAGCCAGGCUAUUGUUUAAACUUUCUAGAAAACCCAUUUC  
>N6013  
UGUCCACUUGCUCUCUCAGAACUAGGAUGUCAGCUAGCUUA  
>N6014  
AGAGAGAAUUGCACCAAAAAACUUC CAGUUGUAUGUGGUGG  
>N6015  
AAAAACAACAACAAAAAAAACUGGCACUCAAAUGACAUCUC  
>N6016  
CCCCAAAUUCUACCAGAGAACUCCAACAACUGAUAAACAC  
>N6017  
UUUAGUAGUAGUUUGACAAGACUUGAGAGUAGUUUUAUAGA  
>N6018  
CCUGGGCCAGAAGGCUGAAGACUGAUGCUC CAGCUUCCUGA  
>N6019  
UCAGAUAGUAUACAAGAUAAACUGUAGUAUAACCAAUAUGG  
>N6020  
UCAGGGCUGCUUGUGCAGAAACUGAAGUGUCAUUAUUUUA  
>N6021  
GAGGUAAGCACGAACCAGAAACUUUUCUUUUUCUAUCUUC  
>N6022  
UACCUCAUAGGACUGACAGGACUCUCCCUCUGUCUUAGGGU  
>N6023  
AGUAACAAACUGACCUCUAAACUUAUGUAGGUUGGUGGCAC  
>N6024  
AGUGGAAGAUACAUGGUGAAACUCAAAAUGGCUGAUGCUAU  
>N6025  
UUGCUACAGUGAGAGAAGGAACUGAUAAAGGGGUGCAACGA  
>N6026  
UGC UUAGCAUACCCUUUGAGACUCCUAUGGUGACAACUAAG  
>N6027  
UCUGAGAUGC UAGUGC UAAACUCAGACAUUCUGUGUACUA  
>N6028  
AGUUACUAAUCUGAACUUAACUGGUUUUAUUUAUUUAUGUU  
>N6029  
CCAUGGUUACCAUCCUGAAGACUUCAGAGAUAGGUGCAAAG

>N6030  
GGAAAAAAGUUGAAAAUAGACUGAAAUUUAAUGUAACUCA  
>N6031  
CUAUGCUGGUAGUAUAUAGACUAAUUCUUAGGCAAUGGA  
>N6032  
GAGCCUGAAGGAAUCUAGGGACUGCCCCACUUGGGGAUCUA  
>N6033  
GAUUGCUGGUAGUAGUGUGGACUGGAAGCCAGGAAAGGCAA  
>N6034  
ACAUUGGGUGGGGAAAAAGGACUGAGGACCUGAAUGCCAGC  
>N6035  
AGGCUCUGAUGGAAAAUAGAACUUUUCCCUCAAAGGAAGCC  
>N6036  
UGGUUGAAACUAUAAUCCGAACUUAAGAAGCUAAUGCCCU  
>N6037  
CCAUGAACUGGAAGCUCAGACUCCCCCCCUGGUCAUUUUG  
>N6038  
AUAUGUUAUCCUUACAAAGACUUUCAGUUCAAUAAAUGUU  
>N6039  
GACUAGGACAGAAACCACAGACUUCAGUAGUUUGUCUACCA  
>N6040  
GUUAAAGCUGGCAUAUGAGAACUGGAACUUUGUGGGUAUG  
>N6041  
AGGAUGUGGACUAAACAAGGACUUAACCAUAUCCUCCACAUU  
>N6042  
UUUACAGUGC UUAAGAUAAAACUCAUAACUUCACACAUAUCU  
>N6043  
AAAUCACUAGAUUCUUAAGACUCUAGUGUCAGAUCAUUUG  
>N6044  
UACAACUUUCUACAACAGAAACUUGGUUAUGACUAAAGAAA  
>N6045  
UAGUAGUGCAAUAAAACUAGACUCACUCCUGUGCACUGUAG  
>N6046  
ACCGGGGAUCAAUUUGGGAGACUUAACGGUACCGCCGUUCC  
>N6047  
CCACUUGUCCUUGCUUUGAAACUUA AUGGGUAUAUGUUGGC  
>N6048  
UGAAAACCCUUUCACUUUAGACUCCAGCUUCCUAGCUAGUU  
>N6049  
UACAAAUGGGACCUCAUAAAACUGCAUAACUUCUUUAAGGC  
>N6050  
GGAAAGUACAAUGGGGCAGGACUUGUGUGAGGGAAUACUGG  
>N6051  
AGAAUCGCAAUCCACAAGGACUUGAGAUGCUCAGUGAG  
>N6052  
UCUCCUUUUCUGUACUGGAAACUGAACUUGGUGUCUUACAA  
>N6053  
GGGCUCGAGUCAAAAGGGAGACUUUUAUGAUCAACACUGAG



>N6054  
AUUGAUCCUUGCUUGUUCAAACUGCUUUUUUUGAUAGUGCA  
>N6055  
GGUUUUUGAGGAACCUCUAGACUGAUUUUGCAAAGUAAUUGU  
>N6056  
UUAAGAAAGUCACAAGAUGGACUGAAGAGAUGGCUCAGAAG  
>N6057  
AGCAUGAAACUCUAGGUAAGACUUGCUACUUGUUAUGUAUU  
>N6058  
ACAAAUGGGAACCACCUCAGACUCCAGCAUCCUAGUGAAAC  
>N6059  
UGUAAAUUUGGAGGGGGAGAACUCAUAAAAAUUUGUGGAA  
>N6060  
AUCGUUUUGUAUUUGUGAAAACUGUCAGUGUGUCUCUCUCA  
>N6061  
AAGUGUAAUUGUUCAUGGGAACUCUACUUCAGCAAUGUUG  
>N6062  
ACAGAUAGAUAGUUUAAUAAACUAGGGUAGGAAGACUCAGC  
>N6063  
UAGAUGAAGAUAGAAUAAAAACUUCUGAGUAAGGUAAUUG  
>N6064  
AAACAAUUCUCAGAGACGAAACUAAUACAAACAUGAUGAAG  
>N6065  
AACCCAUUGCUGAAAAUAAAACUUGAACCUUGGUCAGAAA  
>N6066  
GAAUACCCUGAUAGGUUAAACUUGUUGGCCAACAAGUGCC  
>N6067  
CCUUGGGACUUGCCUAUGAAACUCAGCUCUUGGAGACCCUC  
>N6068  
AACAAACUGAUAACAGGAAGACUGGAUACAUUUGUGCAAGG  
>N6069  
CCAAAGAAGGAACUUAAGGAACUCUGAUGUCUUCAGAUGUA  
>N6070  
AAACGGUGGCAGAGGCAGAGACUAGGUCUCUCUGGGAAGCU  
>N6071  
GAGUUUACAAGUAAGCCUGGACUGCCACAUCUAGUUCAGG  
>N6072  
UGUAUAAUUUUUCCCCACAGGACUAAAUAGGAGAAGUAAAUA  
>N6073  
UCAAAUCCUCACCCAAUAAAACUACAUAUAGAAAGCAUUAAG  
>N6074  
UUAUCCUUGUCUGCCUCAGGACUUUCCAAUCUCAUUUUUUC  
>N6075  
ACUUGAAGUAGGCGUGUGGAAACUUUGGUUCUAUUGAUGUGC  
>N6076  
ACCUCACCCCUAAGCAAAGAACUACAGACAGCUAAGAAAGG  
>N6077  
CAUUGGGAAUUUGACAGCAAGACUAAGUCUAAAAGGAAGGAA

>N6078  
AAUUAGGUGAGCCAAAGGGGACUUGCGGUUGCUGGACUUCA  
>N6079  
GACUUCAUCAUUUAAAUGGGACUGUAGACACAGUAAAUGAU  
>N6080  
GCAAAAAGUUAAAAGAGUCAAAACUACUCAAUUCCCAACAUCU  
>N6081  
UUCCACAAUAGUUUCUUAGAACUUUUACCUACUAAUUCUUU  
>N6082  
GUGCUGGUGUACAACACAGGACUAAUUUGUUUACUUAUCUAA  
>N6083  
AAAGCUAAGAAUCUCUUUAGACUUGCUGAUCAGUUCUUGAU  
>N6084  
CCAAAUGAAGACUACUUUGAACUAGAAAAUAGGUUGAUACC  
>N6085  
GAUGUUCUUUCCUUUCUAAACUUUGGCUCAAAAAUUCAG  
>N6086  
GAGCAGCUGACCUUGGUAAGACUGUCACGCCCAUGUGCCCA  
>N6087  
AGUUGACAUAGAGGGGGAAGACUUUAGAGGAAGUGGAAUA  
>N6088  
ACAAAACCUGCAAGUCAUAGACUUGGAUGGUUCCCAAGCU  
>N6089  
GCUUAUAGUUUGACUUAUAGGACUGAUUUUUAGACAAAGUA  
>N6090  
AUAAAAGAGUUUUCUCUGGACUCAGGCUCUGAUUCAGUGU  
>N6091  
GUGAAGCAUCCCUCCAAGAACUCACACAUUGAAGGCAUGU  
>N6092  
UAAAGAACAAUGGUUUCUGGACUCCCUUUGUGGGCUGAAAG  
>N6093  
UUAGAGCAUUAUGGGUAAGAACUAAGAGUAUUGAUAGAGGA  
>N6094  
UCUUGGUCUCUCCUUUUGAAACUUGAACAGAAACACCUCAU  
>N6095  
CUGAAUGUUCAUACAGUUAAACUUACUUCUAAAUAUUUGUG  
>N6096  
GCUCAUGUAGGUAUGAUUGAACUCACAGCAGAGGCAGCUGA  
>N6097  
ACUCGUCAGAGUGAUCUUAAACUCUUCUCCCAUUGUUAC  
>N6098  
ACCUUGGGAUAAACAGCAGGACUCGUGGCUAAACUGAGUUG  
>N6099  
CCUGACUUUAUUGAUGAUGAACUGCCAUGUGGAAGCCAAAU  
>N6100  
AUUAAGCAUAUAUAUUCAAACUAUGCAGGUAAGCUGCGGC  
>N6101  
AUAAAGAACUGAAAGUAAAAACUCAUAAAAGAUUAAAUAUU

>N6102  
GACUAAACAACAAGAACAAAACUAAAUAAAACAGAAAAAA  
>N6103  
CACACACAUGAAAGGUUGAAACUCAUCCUAUCAGCCCAUGU  
>N6104  
GAAAUAAAUGUAAUGAAAAAACUGCAUGGCUAAGGAGAUGU  
>N6105  
CAUCAAUUUAAUAAAAGAAACUUCCUAAUGCUCUCUUUGA  
>N6106  
CCCCACCCACUCCCGUGGGACUGUAAAAGCCCUCAGCUCC  
>N6107  
CAAUGCCUCAGACCCAUAGGACUGACAAACAUUCCUCAGGU  
>N6108  
GUCUGAGGGAAGUAUUCAGGACUUCUUCAUGCAAAGGAUGU  
>N6109  
GCUCAAGUAGCAGAAACCAAACUCAAGCCCUCAUUAUCCAG  
>N6110  
UAUUC CAGGUGAAUUUGCAGACUGCCCUUUCUAAUUCGUUG  
>N6111  
CGGCUGUCUUAAGCUAGGAAACUGUGCCUGAGCAAGAGUU  
>N6112  
AGCUUCCCUUGCCAGUGAGGACUAAUUAACAGGGCUGUUCU  
>N6113  
UCAACCUGAGUUAGUUUAGACUCAGUAGAAUAGGUAAGA  
>N6114  
AUUUUUAUUCUGAAAAUCAAAACUUGGUUUCGAUAAUUUGGG  
>N6115  
CAAGUCUUCUACAAGUGAAGACUGAACUACUGAAUAAGGAG  
>N6116  
AACGGCGCUACUUUAGGCGGACUUGCCAGUGUGCAGCAU  
>N6117  
UCUAUUUUUUAAUUCAUAAACUAGGCUGUUUACAGUCCC  
>N6118  
GUUUUGUCUUUCUACAUGAACUCUGGGAGUCUCAGCUCUG  
>N6119  
GUAUUGCCUGCCUUUAUAAGACUUUCAUGGUGCAGAAUUGG  
>N6120  
AUCUCUCUGCAGAGAAUUGAACUGUCAGCCUUUGAUGUAAC  
>N6121  
CAGAAGGGAAACAAAAAUGAACUAAGUUGUGUUGUCAAGU  
>N6122  
GAAGUUUUUUUCGCUGUGAACUCCCGUCAUUCUAGACAUC  
>N6123  
GUUUCUGGUCAGGUACAGAACUCGAAACCUAGAAAAUUCU  
>N6124  
AGAAAACCCAGGGAGGCGGGACUAACUAGAGGUGGUAGAU  
>N6125  
UUCAUUGAUCGGUUUUUAGGACUUUGCAUUUUUCUAAAUAU

>N6126  
GUGGCUUAGCAAGUAAAGGAACUUGUCCCCAAGUUGGAUGG  
>N6127  
CCUGAAGCUUCAGGAAAGGGACUGAAUGUGGGGCGUCAUUA  
>N6128  
GAUAAUUGACUCCAUGAAAACUGAAUUACCUCAACAAGGU  
>N6129  
GAAGAAUUGGUCAAUGUAAACUUUUCAAUUGUAAAUGUA  
>N6130  
AGUACUAGUCUGUAGGGAAAACUUGUUCCAUAUUUUGUAU  
>N6131  
CUAGAGCUAUGGCUUGGGAAAACUGCUUGCAAAAGAGCAUAA  
>N6132  
ACUUGGCCACCAUUGAGUAAACUUCUCUUUAAAUUACCUAG  
>N6133  
CUAGGCAUGUAGGAGAGGAGACUAGUGUAUGUCAGAGGAGC  
>N6134  
UAACAAACAUCACCCCCAGACUUUCAACCCUUUAGUGUCA  
>N6135  
GAGGACCCUUGAACUCAUAAAACUCACAGCAGCCAUGGCCAA  
>N6136  
CUGUCAUCAAGGAUGGGCAAACUCUUAGAAGCUUCAUCAUG  
>N6137  
UAGAGAAUCAAGGAGAUAAAACUGUCCCCAAUAGUAAAGCC  
>N6138  
GUAAUCCCUUGAAGUAGGGACUAGGCUCAGGGUAGAAUA  
>N6139  
AGCAAGCCAUCAUAUAUAAAACUAUUUGGGGUUUUUAAA  
>N6140  
GAAGGUCACUUUCACUUCAGACUUCCCAUGUGUGGUUCCAA  
>N6141  
GGUCAGCACCUGAGUUACGAAACUUCCCCUGAAAACCUUCAC  
>N6142  
AGUUAAGUUAAACACAAUAAAACUUCUUAUGUUUCAGUAGA  
>N6143  
UCUUUUUAGCAAGGAUGGAAAACUUGUGGUUUUGAUGUGAUU  
>N6144  
UGACCUUGGUAAAUUUUGAAAACUGUACCCUCUACUACAUG  
>N6145  
UACACAGAUAAACUUUAUCAAAACUGCAGACAAGGACAGUUGG  
>N6146  
CUGCAGACAAGGACAGUUGGACUUGAUGUGAGGACAAAGCU  
>N6147  
AGACUCCUGCCCUGUCCUGGACUGAGGCACAGCCUGCAGGG  
>N6148  
CUGAAAACUAAGUCCCUAAAACUCAUGCUCUUUAGAUUUA  
>N6149  
GAGCUCAAGUUGCAACCCAGACUGGUGUGCACAUGCUGUUU

>N6150  
UAUGCAGAUGUGGUCCUAGGACUGGGAAGGUAGGAAGAUCA  
>N6151  
AAUUACAGUUUAUCUUUAAAACUGAUAGAUGCACAGAAACA  
>N6152  
UAGCACACACAAGCCUUCAGACUGGAUCCCUACUAUUAAA  
>N6153  
CUGGAUCCCUACUAUUAAAACUUGUCCUUGCAUACUUUAU  
>N6154  
GUGUAAAGGGGCUGUGAUGAACUCAGUAAUUAGGAGACAGC  
>N6155  
UAGUCACUAAGGCCCUAAAAACUUUCCUCACCCCAACCCC  
>N6156  
GAAAUUCUAUGCAGACCAGACUGGUCUCAACUCUGAGUG  
>N6157  
CCUCCCAAGGGCUGAAACAAACUUUAAAUUAAAAGUCAUG  
>N6158  
UACACACACAUAAUUUGAACUUUCAGGUAAUAUGUGUGU  
>N6159  
GUCAGCAGCCUACAAAUCAAAACUUUUUUUGACCUAGUAUUU  
>N6160  
CCAGAGACCAAGUAGCAGAAACUCACCCUGUGCUAGAGCCUG  
>N6161  
CAUGAACUACAGUUUCUAAAACUCUGAUUAUCUAUGUAGCUA  
>N6162  
ACCCCUUCCUAUUCAGAAAACUGUUGCUCCAUCCUCAUA  
>N6163  
UCUCUCACAUUUGUAGGUAAACUGUUAUAUAAAAGUAAUAAA  
>N6164  
GUUAGUGGAUGGUUAUGGUAAACUUUAAGAAUAUUCAUUGCU  
>N6165  
GAUUGGUCCUGAGUGACAAAACUCUGUACUGAGAUUGAUAG  
>N6166  
ACCCAUCACCAUAUAUGUGGACUUUAUAUAGUUUGACAAGU  
>N6167  
AUUUCUAAUCUAUAUGCUAACUUUAUGCUGAUAGGAUCAC  
>N6168  
AAUAAAACUGUUUUCUGAGAACUGCAAGUGCUCUGAGCUGC  
>N6169  
UUACACAAGUAUGAUUCAAAACUGAAAGGAUGGGGAACUUU  
>N6170  
GAGUUAGUGGUUUUAUAUGAAACUGAAAGAGAGGGUUAUUGU  
>N6171  
UUUUUCCUCAGACUUUGGACUUAGGGAGGGAAGACUGAC  
>N6172  
UAUCUUUUGCCUCAUUUCAGACUAAAAUGUUAACAACUUU  
>N6173  
ACUAAGCCUUGAAGGGAGGAACUGAUGGAGACAUCCCAUUU

>N6174  
AUACAAAUAGGUACCUAAAAACUUAAAUAAGCCAGGCGUG  
>N6175  
UGUGUACUCUUUAUUUUUGAACUACUUGCUUAGUUAGCUCA  
>N6176  
UCACCAGUGGGCAUGUAUGAACUGAAAACUGGAGCAGCAAU  
>N6177  
UCAUUCCCAUUUGGCAGCAAACUUAAGGCUGGGAGGGUUA  
>N6178  
AUGCUUGGUUUGGGUCAGGAACUAAGGUGGGCAUUGGAAAU  
>N6179  
UCCAUGGAGAAAACUAGGAAACUAUCAAGGCUUUUAUGAA  
>N6180  
GGCCUCAAAACCAAGACAUAGACUGCAACAUCCACAUGGCAU  
>N6181  
CAACCUAGCCCUUAGUCCAAACUGUGUCUGGGAUCUCAAGG  
>N6182  
AUGCUGACAUGGGGUCUGAGACUAGCUAGAUUGGAACAGUG  
>N6183  
AAGAUUAUGAAGCAAUAUAAAACUCCUAUCUUUCUCAAUAC  
>N6184  
ACAGAGUUGGUGAGUGAAGGACUGAUUCGUUGCUCUCAAG  
>N6185  
GCUUGUGCCCAGCAGAAUGGACUGGUCUUAUAUGCAAUGAA  
>N6186  
UAAGGGGCUAUUAGCCCAGAACUUAAGAAUACUCAAGAUAAA  
>N6187  
UGGGCGAUUAAAUCAUAAAAACUAGUACUAUGCCAGAGUAU  
>N6188  
AAGUAAAUCCUCAUAGUAAACUGAGUGUAGAUUAUGAGAA  
>N6189  
UAUCAUGCCUAGAGAGGAAAACUAGCCUAGAAACAAAGUA  
>N6190  
AUCUCCACUCCCUACCUGAACUCUCCGGCCAAGGUUAUCU  
>N6191  
GAAAAAUCUCUAUGACAAGAACUUCAAGUCCUGAAGAAAG  
>N6192  
UAUAAAGAGAUACAGCAAAAACUAGAAUAGGAAGAUUAAA  
>N6193  
CAGGACUCAUACACAUUGAACUCAGACUGUAACAGCACAC  
>N6194  
AAGUGUAGGUGUGUCUAAAAACUGAUACAUAUCAAUUAAC  
>N6195  
CUCUAUAGAAGGAGAUACGAACUGGGUAAAGGAUGUAGGCC  
>N6196  
AACUGAAAAUUUAGUAGGGACUCAAGCCCCGGGCUACCUU  
>N6197  
GUCUUCUCAAGGAUAAAAGAACUUCUGGCGGAAUCACCAUG

>N6198  
AACCAAGCGAACAAACAAAAAACUCAAGGCAGAGCAAAGUGA  
>N6199  
CCAGGCAAUAGAUUAGCUGAACUGUGACCAGAAGCCUGGUG  
>N6200  
UGAUAAAUUUUGUCAUGAGGACUAAAUAAGAAAGCAUGUGU  
>N6201  
AGCAUUGAGAGAAGAGUUGAACUGCAAAAUCUUGGUGGAUA  
>N6202  
UAGGCUUGAUAAACACAUGAACUAAAAAAUAUCCUUUAAUU  
>N6203  
UCAGGGUCUGGUUAAUCAGACUCUUCUAUUGUUCAUACUA  
>N6204  
UUUGAAAUCAUUCUUCAGACUCAGGGUGCCAAGCCUACC  
>N6205  
CAACUACAUAUUCUUGCAAGACUUUGGGUAGAGCUAGUGUG  
>N6206  
UCCAGUAACGCUGCUGCAGACUUUAAAUAUAUUGUAUUUU  
>N6207  
UAGUUAUCAUAAUUAACUAGACUAGUAUCUAAAUGGCCAU  
>N6208  
AGCAAUCCAGAGCAUCAGACUGAGGAAUCGUUGCAUGGA  
>N6209  
GGUAGGGAAUUUCUCCUAAGACUAAGACUGCCAGAGCAGUC  
>N6210  
UAGUCAUAAGCUCACAGAAAACUCCCUCUCUAAAUGUUAC  
>N6211  
UUACUGAGAAAUAUUUGAAAACUUUAUAAAUAGCACCAGUC  
>N6212  
UGUUUAUGUAGAUUUGAAGGACUGUGUAAUUGAGGGAAAGA  
>N6213  
GUCUAAGUUUUUAUACAUAGACUUUCAUGCAAUUUGUGAAG  
>N6214  
AAAUAUCUCUGUUUCUAGGACUUCAGUUACAAUGUGGAAA  
>N6215  
GUCCAAUCCCAUAGAUAAAACUCCACAGGAUCUUUGAACA  
>N6216  
CUUCUCCUUUCAACCAAGAACUACAGGUGGGCGACUAUAC  
>N6217  
AAGAAGGAAUUCUAAUUUAAAACUAAUCAAGAAACCCACCA  
>N6218  
AUUGGCUCAAUUGACAAUGAACUUUAACCCACUGUCUUUCC  
>N6219  
GAUUAGACCAAUAGAACAAACUCUGGUGUUGGCUCAGCUU  
>N6220  
UCUUUCUAUAUGUAAAGAAAACUAUUUUUGUUUAUUCCCUC  
>N6221  
UAUUGCUGGUAGGAUAGAAAACUGAUACAACCACUCUGGAA

>N6222  
UGGUGACAUUGCUGAUCUGGACUGCUGGGAUCCUGACACCA  
>N6223  
UGUUCUUACCAUUGUAUAAAACUAGGCAUGAUGGUUAUAUGC  
>N6224  
UUUAGAAGAAUGAGAGGCAGACUAUGGUAGUGUGUACAAGG  
>N6225  
UCGUACAAAGAAAUGUCAAAACUUCAAUAACAGAUUUUUGU  
>N6226  
GCAUGGGAAUCAGACAUUAAAACUCUCCCCUCAUUUGAUUA  
>N6227  
CUUUGAAAGUUAAAUCCCAGACUAGAUCUGAUGCCAACCU  
>N6228  
GCAUCACAUUGAACCAAUGGACUCUGUGCAGUAAAAGAAAG  
>N6229  
AUGCUGCUGAGGAGGUAAGGACUCCAUAAGAAGAAACAGAU  
>N6230  
UUUAAUGGUCCUGGAAAUGAACUACAUAUAUGGUUGUGUAG  
>N6231  
UCAAAUGGGCACAUGCAUAGACUCAAGGCUUCACUCAUGAU  
>N6232  
AUCUUUUGUCUUCUGUAAAAACUGAUGCUGUGAACACAAGU  
>N6233  
UAAUCACUCACUCAGUAAAAACUCACAAGCUUUACUCCAG  
>N6234  
UUUUGGGCAAAACAUAUUGGACUAAUCAUGUGUAAUUCAU  
>N6235  
AAACAAAAACAACAAGGACUAGGUUUCUGUCUUUAGGG  
>N6236  
GACUCCAAGGAAGGCUGGGGACUGUAGUUUUUAAUGUGAG  
>N6237  
CCCUCUCAUUUCAUGUCUGGACUCCUAAUGCUGGCUACAAA  
>N6238  
AAUAGAAAAAAAUGGACAAACUCAUGGUAAAGAAUAAUUA  
>N6239  
AAUUUUUCAUAGAUAGAAGAAAACUAACACCCAGAUAGAAGAA  
>N6240  
CUAACACCCAGAUAGAAGAAAACUGCUCAGACUCUAAACCCC  
>N6241  
GAAAGGUCUGGAGCCAUAAAACUGAAGUCAGCAGGCAUGGG  
>N6242  
GACAACUCUGAUCCUGAAAGACUCAGGCAGCCAGUGUGGUC  
>N6243  
CUUAUGGGCAAUCCAAGAAAACUAUCAAGUCAUUUUUUAUU  
>N6244  
UAAUCCCUGUAAAGUUAAGACUUGAGUUCACUAUAACCCU  
>N6245  
CAUCUUGUGGUAAAUAAGAAAACUGACAGCGUCAGGAGUGGU



>N6246  
GUUAUCUGAAACCUACUAAAACUUCUCCCACUCCUCUGUCG  
>N6247  
UGUGAGUUUCAGUGCUGAGAACUGAACUUGGGUCCUCUGCA  
>N6248  
AAAUGUUGCCAUUGUACCAGACUGUCUGGCUAACUAUAUAA  
>N6249  
ACUGUCUGUGACUGUCCUGAACUGUGUGUGACAGUUAAGCU  
>N6250  
GCUUCGGAGGGGAGCAAGGAACUUGGCUGGGGUCAUUCUG  
>N6251  
AAGAACUUGUGAGAGGCUGAACUAAAAGGCAAUGGACUAAU  
>N6252  
GAAAGUUAAGAUAAUUAUGAACUUUGAGAGGAAAAGUUUGU  
>N6253  
CAUAGAAUAAAUAUAAGAGAACUGUAUGCUUUCACUGAGGA  
>N6254  
AUAGAGUAUAGACAGCAAAAACUAAAAGUAAGUAACUUGAA  
>N6255  
GCAGAUAAUACUCCACAGACUUCAGUGAAUGCGUGACAU  
>N6256  
AAGGAAAACAAAGAGCCUAGACUCUGGCCUUCAGCCAGUAU  
>N6257  
CUUGUGCAGGUGGCUGCUAAACUCUGCCAGCUGCUCAGCCA  
>N6258  
UAUUAGACUAGAUUUUGAGAACUACAUGUAAAUGCCUAAGC  
>N6259  
UUAGGGAUUGGUCCUAAAAGACUAUGUGCAUGCCACGCAUA  
>N6260  
ACACUAAAAGAUAAAUAAAACUUAACAAGAUAAAUAAAAG  
>N6261  
GGUGCCUUUUGUCCUUGGGACUCAAUGAAAUAUAUUUCC  
>N6262  
UGCUGAACUCAGAAAGAAGGACUCACUCAUUCAAGUGCUU  
>N6263  
UAUGGUAGAAGGAGUGGCAAACUGACUCCAACAUCUACGU  
>N6264  
ACAUACAUAGGCCAGUUUAAACUGUUGCAAGGGAGACCAUC  
>N6265  
UUCAAACAAAUGUAAGAAAAACUCAAAUGGAAUUA AAAAAC  
>N6266  
GAGGAAACUUUUUGAUUUGAACUCUUUACACCUAUUAUCUG  
>N6267  
CACCAAGUAACUUUUCAAAAACUAAUAAUUCUACUCACAUC  
>N6268  
UUCUAAGCCUGAGUUGAAGACUUCUGGCUCUUCUCGGA  
>N6269  
ACCAGCAGCGAAAGAAAGAAACUUC CAGAAAGAUGAGCUAC



>N6294  
GUAAAUAGUAAGUAAAAUAAACUGAGAACA AAAAUGAAAAUA  
>N6295  
AGGGGUUUUGACUUACUCAGACUGCUUGUUUAUUUGUUUGC  
>N6296  
GUCUGGGGUCAGUUUGCAGGACUCAGAGACAACUUUGUACU  
>N6297  
GCUGGUUGUGGAGGGAGGAAACUUA AAAAAAAAAAAAAACA  
>N6298  
AGAAA AUGCCCUCUGAGAAAACUUCACAGGGAAGGAAAAG  
>N6299  
CCUGCAGGACUGACUCAAGAACUCCACUCCUUAGUCUGACC  
>N6300  
AAAAUGUACCUAAUCAAGAAACUGAACGUUGGCUGUGAGAC  
>N6301  
CAAAGGGAGGGUCACAUCAAAACUAAGAAAUUCUGCCAGCAA  
>N6302  
AAUUUUUUUACUCCAAUGAACUUUUAGGUUUCAGUAAAAG  
>N6303  
GAUCUAGAGUUGUUGGGUGAACUAAUGAGUGGCAGAAA AU  
>N6304  
GAUGGUUAUUUAACUCAAAAACUAUCCACAAAUUCUGGGUA  
>N6305  
AGCAAACCAAGCUUCCUGAAACUGUGUCCCUUGCAGGUGAG  
>N6306  
UCCAUGAACUGGAUCCAAAAACUGUAAAAGAUAAAGUUGUUU  
>N6307  
AACAGGAAGAUAAAUGAAAGACUGGCUCACUGGAGUACUGG  
>N6308  
GUUAUUGCAGGUGCUUACAAACUGCCUGCUGUGGUCCAGCC  
>N6309  
UCCAUCCUGGGUGCCAAUGAACUGUUGAAAGUUUACUGGCU  
>N6310  
ACUAGACCAGUGGUUCUCAAACUGUGUGGGUCAUGACCUCU  
>N6311  
UAAAAGAAGCUAAGACUAAAACUUUGGAAAGCAAUAAAGAC  
>N6312  
GUCAGUGAGAAUCUAAACAAACUCAAAAAGGCUACGAACAGU  
>N6313  
ACUAGAUUAUCAUCCACCAGACUUAGACUUUUUAAAAUUUC  
>N6314  
ACACAAAGCAGCUAUGCAGAACUGCACAAGUCCUUCAACUC  
>N6315  
UGAAUAACAAGACAAAGAGACUGCUUUGUCAGGAUGAUUC  
>N6316  
UAGCUGUGACCUUAUGAUAGACUGCACAUCUAUCUGCAGUG  
>N6317  
AGAUUGAUGCACCACUGUGGACUACUUAAGCCCCACUCAGU

>N6318  
GAUCAGAAAACCAAGUGAAGACUGCUCACCCUGUGGAAGCA  
>N6319  
CUCUUGCCUCACUGGAGAAAACUGCAAGGGAGGAUGAGGCU  
>N6320  
UAAGGUGUUUAAGAGUGGGACUCAAAUGUAUUCUCUUUCA  
>N6321  
UGUUUGUCUGUUUGUGACAGACUAGCUGGAUUCCUAUGCAG  
>N6322  
ACUGGACUGUUACUCCUAAACUGCAAGCCAAACUAUUUCC  
>N6323  
UGAAUACUAUUUUUUUUCAGACUCUCACAAAAGAAAGCAUC  
>N6324  
UCAGUGUUCACACAAAGGAGACUCAUCAACAGUUUAAGUAU  
>N6325  
AACUCAGCAAUUACAGCUGGACUAGGAAAACAAUGGCAAU  
>N6326  
AAGAAAAAAAAAAACCUUAAACUUAGCCUUUAUACUGAGGG  
>N6327  
CUACGGAGGAAGACGCAAGAACUCCCUGAAGCUUACUGGCC  
>N6328  
UGGUGCUCCAUGGGCUACAAACUGGGAAAUCUCCAAAAUAA  
>N6329  
AGGAACUGUAUACUACGGGGACUUCAUUCUCAAUCUGAAA  
>N6330  
AAAACUCCUGGUACUGAGAACUAAGACAACUACUUAGGGC  
>N6331  
CAUAACACCUGAAUUGAUGAACUCAGAGGUCCUGACAUAGG  
>N6332  
AUGCCUCCUGGGUCACAAAACUAAGAAAAGAAUCAUGAAA  
>N6333  
GAAUGUAGUCUGGCUUUCAAACUUAAAAAAAAAAGAAGAU  
>N6334  
UUGUGGAAUGC UUAUUUGGAACUCAAGUAUGUAUCCCAUA  
>N6335  
UUCUUGUUUGUAGACAGCAGACUGUGCAUUGUGGGAUAUGG  
>N6336  
AGAGUCUCCACUGGCAAGGAACUAGAUCUAGGCUAAAGCUC  
>N6337  
CGCAUAAAUGUUAUCAAGGACUAAACAGAUAAUUUCCUUC  
>N6338  
ACUGGUUGCUCUUGCAGAGGACUAUGGAUUGCAUCCAGAA  
>N6339  
UUAGCUCACUUAUUAUUGAGACUUUUUUUUUUUUUGGUCA  
>N6340  
UAGGAAUAGCCUAUGGAAGGACUCUGAACGUCUUCUAAAUU  
>N6341  
AUCCACAAGGACAUAUUGAAACUUCUAAAACAAUUCUUU

>N6342  
AUGCAAACUCAGACCCUAGACUUGCCUGGCAAGAACUUUG  
>N6343  
UUAUAUCAGUCAUCAUACAGACUCUACCAAACCUCUCUC  
>N6344  
CCUCUGCAGAAUACGACAAAACUGCUCAGCCUCCUGCUCA  
>N6345  
UGAAGGCAAAGUCUCCUGAGACUACAAAUUAUACUCUCAG  
>N6346  
GGGAUACCAAUGUGUACAAACUAGGGGUCUGGAAGAAUUC  
>N6347  
ACACAGCCAAGUCCUUGAAACUCCUCAGGAGGCCAGAAGA  
>N6348  
UAAAAGACCAGGAAUCAAGACUUGAAAUAACUGUGGUGA  
>N6349  
UGUUUGGGUAAUUCAGCAAAACUGGAAACUACUGUUGCGCU  
>N6350  
GUUCCCUUCUUACUCUAGAACUCCCUAUUCUGGAACAGGU  
>N6351  
AUAUGGGCCACACAAAUUGGACUAGAUGUCAUUUUUUUUC  
>N6352  
AAUAAACACUGUACUUACAGACUAGCAGUCUAUGAUGGUAU  
>N6353  
UUCUAAAUCAAUCAUUUAAACUAGGAAGAUCCACUUCUAA  
>N6354  
UCAUAGGCAGCCAUUGUUGGACUAGCUGGGCCACAGCCUGU  
>N6355  
AAGUAUCACUGGGGAAGCAAACUGCUCUUAGUCAUACGCUG  
>N6356  
UGCUGGAGAUUGAACCCAAGACUUCGUGCACACUACAAACU  
>N6357  
AUAUAUCAGAAGGAGAUUAAACUAUUAACAUUUAGCAUCCC  
>N6358  
CCCAGACUGGCAGCACCCAGACUGGCAGCACACAAGUUCAG  
>N6359  
ACAGUAGAUACUGAGCAUAGACUGUCAUCAAGAGAGCUGC  
>N6360  
GAAUCCUGGCUAUGGGUGAAACUGUACCAUAUAUCAAGCGC  
>N6361  
CCACUGAAUAGAGUACCUAGACUUCCCCACCGACAGCCUUA  
>N6362  
AGCCAAGAAAACACAAACAAACUUGUUGAAGGAAACAAUA  
>N6363  
AUCAGGGAAAUGCAAGUCAAAACUAGCUUGAAAUUUAUCUU  
>N6364  
UGAGACACCCAGCCUCAUGGACUGAACAAACUACUGGUUAUU  
>N6365  
UGGAAUACAUAACAGUCGAAACUAGGGAUUUUCAAUCC

>N6366  
ACUGUGUGAGUUUGACAGAAACUCACUGUGUGGCUGAAGAU

**Supporting Information S3. The benchmark dataset  $\mathbb{S}_{\xi=20}(\text{m}^6\text{A})$  for  $\text{m}^6\text{A}$  modification in RNA.** It contains 1,130 positive samples whose centers can be  $\text{m}^6\text{A}$  modified as confirmed by experiments, and 1,130 negative samples whose centers cannot be  $\text{m}^6\text{A}$  modified. All the sequences included are 41-nt long with the adenosine (A) located at the center.

**I. Positive subset  $\mathbb{S}_{\xi=20}^+(\text{m}^6\text{A})$**

>P1  
CCUUUUCUAAGUGCUUACAGACUCUCUGUUUAAUAAUCCA  
>P2  
AGCAGGGAGGGCAGGGUGAGACAUUCAGAGGAAACGACGAC  
>P3  
GGUGAGGCUACAGACAGGGGACUUGCAAGCAGGGAGGGCAG  
>P4  
AUUGUAAUUGCUAGCAUGAACCGCGUGGGCUUCUCAGGGU  
>P5  
ACAAAGAAGGGGAGGGAGGAACAUGCUUGAAAGGGGUGUGC  
>P6  
UAAGUUAGGACAGCCAGCAAACUUGCAUCAGUAUAAAUACA  
>P7  
GUGAUCUACAUAUGGGAGAACUGAGGCACAGAAUAAGUU  
>P8  
CACCGGCCCCUCCACGCGGACAGAGGUCAGCCUGAGCCCC  
>P9  
GCCUUCUCUCCAGGCCUGAACUUUCUCAAGUUGACCUCAC  
>P10  
GGGCUGUUAAGGAGUUUGACUUAUCCUGAGGCAAGGA  
>P11  
UGAGCAUGGUGGAAUGGGGACAGAUGGCAGUGUUAAGUAG  
>P12  
CAAGGUCAAAGGAGUCCGAACUAGUCUCAGGCUUCAACAU  
>P13  
AUUCGAUGUUGAAGCCUGAGACUAGUUCGGACUCCCUUGA  
>P14  
CUUCAUAGCCGAAUACACAAACAUAUAUAUAAUAAACACCC  
>P15  
CCACUACAAUCUCCUAGGAACAACAUUAACGCACUCUCC  
>P16  
UAUAACGCACUCUCCCCUGAACUCUACACAACAUAUUUUGU  
>P17  
CCCUGUUCUUAUGAAUUCGACAGCAUACCCCGAUUCCGC  
>P18

UCUCCAGCAUUCUUUUUCAAACCUAAGAAAUAUGUCUGAUA  
>P19  
CAAAGUAACUCUUUUUAUCAGACAUAUUUCUUAGGUUUGAGG  
>P20  
UAAAUCCCCUUAUUUCUAGGACUAUGAGAAUCGAACCCAUC  
>P21  
CUGAGUAGGCCUAGAAAUAACAUGCUAGCUUUUAUUCAG  
>P22  
UAGCUUUUAUUCAGUUCUAACCAAAAAAUAACCCUCGU  
>P23  
UUCAACAAUAUACUCUCCGGACAAUGAACCAUAACCAUAC  
>P24  
AUA AUGGCUAUAAGCAAUAAAACUAGGAAUAGCCCCUUA  
>P25  
UUACCAAGGCACCCUCUGACAUCGGCCUGCUCCUUCUC  
>P26  
AGUUCUACCGUACAACCCUAACAUAACCAUUCUAAUUA  
>P27  
ACAUAACCAUUCUAAUUAACUAUUUAUUAUCCUAACU  
>P28  
UAACUAUUUAUUAUCCUAACUACUACCGCAUUCUACUA  
>P29  
GAAACAAGCUAACAUGACUAACACCCUAAUCCAUCACC  
>P30  
UAGGAGGCCUGCCCCGCUAACCGGCUUUUUGCCCAAUGG  
>P31  
UAUCGAAGAAUUCACAAAAACAUAAGCCUCAUCAUCCCA  
>P32  
AACACGUAAAAUAAAUGACAGUUUGAACACACAAAACC  
>P33  
UGACAGUUUGAACACACAAAACCCACCCCAUUCUCCCCAC  
>P34  
AGGCUCUUGGUCUGUAUUUAACCUAAAUUCUAUAAGAUUA  
>P35  
GAAUUUAGGUUAAUACAGACCAAGAGCCUCAAAGCCCU  
>P36  
AAUUUCUGCAACAGCUAAGGACUGCAAACCCACUCUGCA  
>P37  
GCCUUACUAGACCAAUGGGACUAAAACCCACAAACAUUA  
>P38  
AUUAGGGUGCUUAGCUGUUAACUAAGUGUUUGGGUUUA  
>P39  
GAAUAGUCAACGGUCGGCGACAUCAGUGGGGUGAGGUAA  
>P40  
CUGAUGUUCGCCGACCGUUGACUAUUCUCUACAAACCACAA  
>P41  
CAAACCACAAAGACAUUGGAACACUAUACCUAUUAUUCGGC  
>P42

GGCUUAGAGCUGUGCCUAGGACUCCAGCUC AUGCGCCGAAU  
>P43  
CUACCCUCCUUGGCAGGGAACUACUCCACCCUGGAGCCU  
>P44  
CCACCCUGGAGCCUCCGUAGACCUAACCAUCUUCUCCUAC  
>P45  
CGACCCAGCCGGAGGAGGAGACCCCAUUCUAUACCAACACC  
>P46  
GAAUAAUCUCCCAUUAUGUAACUUAUCUACUCCGGGAAAAAA  
>P47  
ACUACUCCGGGAAAAAAGAACCAUUUGGAUACAUAGGUUAU  
>P48  
GGCGUCAAAAGUAUUUAGCUGACUCGCCACACUCCACGGAAG  
>P49  
UUUUCACCGUAGGUGGCCUGACUGGCAUUGUAUUAGCAAAC  
>P50  
AUUAGCAAACUCAUCACUAGACAUCGUACUACACGACACGU  
>P51  
AUUCUCAGGCUACACCCUAGACCAAACCUACGCCAAAUAUC  
>P52  
UAUUCAUCGGCGUAAAUCUAACUUUCUCCCAACACUUU  
>P53  
AAAGUCCUAAUAGUAGAAGAACCCUCCAUAACCUGGAGUG  
>P54  
CCCUCCAUAACCUGGAGUGACUAUAUGGAUGCCCCCACC  
>P55  
CCCUACCACACAUUCGAAGAACCCGUUAUCAUAAAUCUAG  
>P56  
CCCGUAUACAUAAAUCUAGACAAAAAGGAAGGAAUCGAA  
>P57  
ACAAAAAGGAAGGAAUCGAACCCCCAAAGCUGGUUCAA  
>P58  
GGCCAUGGGGUUGGCUUGAAACAGCUUUGGGGGUUCGAU  
>P59  
CCAACCCCAUGGCCUCCAUGACUUUUUCAAAAAGAUUUAG  
>P60  
UAGCCUAUAUUUAACUUUGACAAAGUUAUGAAAUGGUUUU  
>P61  
GGGAAGUAGCGUCUUGUAGACCUACUUGCGCUGCAUGUGC  
>P62  
AACAAAACUAACUAAUACUAACAUCUCAGACGCUCAGGAAA  
>P63  
CAGACGCUCAGGAAUAGAAACCGUCUGAACUAUCCUGCCC  
>P64  
GGGAUGGGAGGGCGAUAAAGGACUAGGAUGAUGGCGGGCAGG  
>P65  
GAAUACACCGACUACGGCGGACUAAUCUUAACUCCUACAU  
>P66



CCUGCGACUCCUUGACGUUGACAAUCGAGUAGUACUCCCGG  
>P67  
UCCCCACAUUAGGCUUAAAAACAGAUGCAAUCCCGGACGU  
>P68  
GUUGGUUCUCUAAUCUUUAACUUAAGGUUAAUGCUAAG  
>P69  
UUAAGUUAAGAUUAAGAGAACCAACACCUCUUACAGUGA  
>P70  
AAAGCCCAUAAAAUAAAAACUAUAACAAACCCUGAGAAC  
>P71  
AACUAUAACAAACCCUGAGAACCAAAUGAACGAAAAUCUG  
>P72  
CGG AUGUGUUUAGGAGUGGGACUUCUAGGGGAUUUAGCGGG  
>P73  
UUUCGGUUGUUUUCUAUUAGACUAUGGUGAGCUCAGGUGAU  
>P74  
UCUAAUAGAAAACAACCGAAACCAAUAAUUCAAGCACUGC  
>P75  
UGUAGGAGGGUAAAAUAGAGACCCAGUAAAAUUGUAAUAG  
>P76  
UGAAGAGCUUGGUUGCAGAAACUUCGGGGUCUACAAACGCA  
>P77  
CAAGAUACAGGACCACAGGACCGGGGCGAAAUAAAAUUG  
>P78  
AGACAGGGUGGGUCUACUGGACAGGGAGGUAGUAUAGACAG  
>P79  
ACCUGGACAAACACACCUGGACACACACACCUAGACACACA  
>P80  
AUUUGCAAGUUCUUCUGUGACUGAACUCCAAAUGGCACUG  
>P81  
ACAGGCAGAUCCCAGGAGACACGCAGGGGCCCUAAGAAGGG  
>P82  
CGGGGCCUGCUGGUGCUGAACACGGCGCGGCCACUGC  
>P83  
CAGGGGCCCCGGGCUCGGACCCCCACCCGUCCCGGGA  
>P84  
GGAAGACGAGCCCCCAAAGACUCGGACGGAGAGGCCCG  
>P85  
AGCAGGGGAUCGACGGGAGACCCUGCCACUGCUGACGGAG  
>P86  
CCUGACGUCAGCAGACCGAGACCCAGUCCAGUCCAGGGGG  
>P87  
GGGAGGCAGUAGACACGGGACAGGCUUAUUAUUUUUU  
>P88  
UACACCUGCGCAACGCCAUGACACUCGCAAGAAGGUGUGU  
>P89  
AGUCUGCCGGCACAAGAAGGACACUUCCUUGGCCCGUCC  
>P90

GGAGGAAGGAGAAGAUGGGGACAGAGUCCCCAGAGGGCUGA  
>P91  
UGUAGGUGACAAGGGUGGAAACAGAGAGACCUUUAGGUUAA  
>P92  
GGGCCGUGGCCUUUGCCGAGACUGUAGCAGAGAAAACGUAU  
>P93  
CGGGCUGGAGGGUGUGCAGGACGACCUGUUCUGGCUGACCU  
>P94  
UGGCUCUGGGGAGGACGGUGACUGUGAGCAGGAGCUGUGCC  
>P95  
UGGCAACGCCCGGGGCAAGGACUUCCUGGCAUUGGCGCUGC  
>P96  
UGUGUGUAUAUGUGGGGGGGACAUGUAGAUUUGCGUGUGUG  
>P97  
CCUCACACCUCUCUGGGUGCAGAGCGGCUCCGGGACGGCUC  
>P98  
GCUCCUCCAUUCCUUGAAAACUGAACGAUUAUUAUUUUUA  
>P99  
GGAGAACCAGCAGGGCCAGGACAUUGACGACAACUGGGUGA  
>P100  
GGGAUUGGAUUGGAGCCAGGACCUCACUUCUCCUCUGCCC  
>P101  
GCCCUGUUGGCGGCGUCACUGACGCUUCGCUCCGGUCCUCGG  
>P102  
CCCAGGUUCCAGGAAUCCGAACCCCGGAGUGCUGACGCGGU  
>P103  
UGUGCACAGUUUGUUCUUGGACGAGGACUCGUGAGGAUCGA  
>P104  
AGCAAAAACCAAAUUGUGUGACUGGGCUUUGGAGGAGACUG  
>P105  
GGUCUGUCUCCACCAUCCUGACUGGGCUCCUGAGCUUCAUG  
>P106  
UAUCACGGAUUCCACCCGGACACGUGGAACCCGGCCUGGU  
>P107  
ACACACACACAGAGAGAAAACUGCAGUCAGCCAGCGGAAG  
>P108  
GUGAUCGGAACAGUAUGUUGACUUAUGGGUACAGGAGGGCC  
>P109  
UCUCUUGCCUGCUGCCUGUGACCCUGAAGAACAGAAUUGAU  
>P110  
GAGGGCACAGUGGGCGCUGGACCCGGCCCCCAACUCUCUU  
>P111  
GAGGGUGCAGGCAGCAGGAAACCCACAGCCAGCAGCUCCCG  
>P112  
CGCGUCCGCGCGCGCAGGAUUCUUGCGCUGGAGGCCGCC  
>P113  
CCGACCAAGCCUAGCUGCAGACUCCAAAGGGCUCAGGUUUU  
>P114

GGACAAGCUGUGUCACAGAGACUGAGCAGCUCCAGGCGGAC  
>P115  
GAAGCCUUGAUGUGCUUGAACUCAACAUGUCCUCUGCA  
>P116  
AGAGCUGCGGCCUCAUAGGGACCUUAGCCUCUCAUCUGCUC  
>P117  
GCUCCAGGGGGGCCACGGGACAAAAAGACACCUCAGCCUA  
>P118  
UACAUUUUAAACCCAGAAAGACAUCAUUCUAAUGCCUGGU  
>P119  
CACCUCCAGAUGAUCAAAAGACUGCAUGAAGAAGGUGGUGG  
>P120  
CUACCGCAAGAUCGCCGUAGACAAGAAGGGCGAGGCCAACU  
>P121  
CUGCCCCAUCUUGCUGGAGGACUACCGCAAGAUCGCCGUAG  
>P122  
ACGACGGGCCCAUCUACAUGACUCACCCCACCCAGGCCAUC  
>P123  
UCACCCAGAACGGCCGCCUAACAGACUCCUGGACUGUGUG  
>P124  
CCAUGCCCUGGCUGGCAGAAACCCUCAACAGCAGUCUGGGC  
>P125  
GAAAGUACGUGGAGGACGGGACCGGAAGACGAGAGAGGGCU  
>P126  
UAUUUAUUGCCUGGCCGGUGACUCGGGGGAGGAGGCGACCC  
>P127  
CUUCCCGCCUGCCUACCAGGACCCGGGCUUUAGCUAUGGCA  
>P128  
GCUAUGUAUGAAAACUCAGAACUUGAAUCCCGUCAGCUUAA  
>P129  
AUGGAACUGAGGGACCGGUGACACGUGCUUCAGACCGGUCU  
>P130  
UGGAAAUGUCUGUCGACUGGACCUUGGUGGAUUUGGAAAUG  
>P131  
GGUGAGGCGGGUUGCAGUGACUGGUGGCCGCAAGCCCUUC  
>P132  
CGCCAAGAAAGCCAAGGCGGACAGCCCCGUGAACGGGUAGG  
>P133  
AGACCCUUGUUGAAAUGGGACAGUUGGCAGCGGCUCUGAU  
>P134  
UUGAAUUUUGUCCCUUUAAAACUGCUGUACCUGUAUGAUAA  
>P135  
UAUACUUUUGUUUAUCUACAACCCAAUAACAGACAUGAGGG  
>P136  
CGCACACACUCCCGGCAGACAGGCACACACACCCCUUGCA  
>P137  
CGAAACUCUGUCUCAAAAAACAAACAAAUAUUAAAGCCA  
>P138

CCUGAAGCUGGCCAGUUUGACUACGGGAGGAAGUGCUCGG  
>P139  
CCAUCACUUACAAACCUUUAACAUCCUUUUUUUUUUUUUU  
>P140  
CGAUCUUUCACACACUGGUGACCCUGAGAGAGGGAGGA  
>P141  
GAGAGAGGAGGGAGGAGGGAACCUGGCGGGGGUGUCUGAGG  
>P142  
GGUCAUUGUGGACAUCAGGACAACCACGAGGAGGCCACCC  
>P143  
AACCACAU AUGACCAGAUGUACAUGAUCUUCUAGGAAAG  
>P144  
AACUCCUGGCUGGACGACAAACCAAGUCUCUGUCUAAAA  
>P145  
CCUUUCCAGCCGGGCGUCAGACUCCCAGACUCUGGCCCCGG  
>P146  
CAAGAUCUACAUCGUGAUGAACUAUGUGGAGCACGACCUCA  
>P147  
UUAUAUUUCCUUUAUACCAAACAAAACUAUGGAGAACUAAA  
>P148  
GAGUCCAAUUCUUGUAUAACAGCAUUAUAAUUAUCUGCC  
>P149  
UCCUCAAAAACUAAUAGAAGACUGGGUGUGGUGGCUCACGC  
>P150  
GGCUUUUAACCCACAAGUAACCUUUUAUUUUUUUGAGAC  
>P151  
GAAGACCAGCAGAAACUCAAAACUGGGGAUUCAGGUAUCAG  
>P152  
UCAAAUGGGUGAUGAAAAGACUCUUGGAAAGUGAAAACUU  
>P153  
GGGUGUCUUUUUUUGAGUAACUGCUCUCUGAGUUUUGCAC  
>P154  
GCAAAGAGAAUACAAAUGAAACCCCUUCUUCUCUUUCGU  
>P155  
CUAUACAAAACUGUGCUGUGACCUUGCGGUAGGCCUGGAUC  
>P156  
UGGAAAGCAGGUUCUGUGGACCCCCGCCCCGCCCCCGC  
>P157  
GCUCAUGACUUACUCCAUGACAACAUCUUCGCGGAUCA  
>P158  
AGAUAUUGGAACUGCCAGAGACUUUAAAUGACUGUGAUGGA  
>P159  
UGGUUUGGCUGAGGAUGGAGACUAAGGAAAUGGGAAGAAU  
>P160  
GAGUGACCAGACUUUGGAGACUCUCAGCACUAGUGUCGCA  
>P161  
GCCUUUUCUGGGGAGGAGACUCAGAGAUUUGUCAGAGGU  
>P162

CCAGGUUGACGAUUGAUUAAGACCUGGUGACCGAAGGGAAGG  
>P163  
AGAAGAGGAAAGGGGUCUGGACCAGGUUGACGAUUGAUUAAG  
>P164  
UGGAUGCACGGACGACGUAGACACACGGAUGACUCAUCCAC  
>P165  
CUCAAAGCCUUCGAACUCUGACUGGUCGAUCCUCUUUAUGG  
>P166  
UUUGUUUAAGCUAUUUAAAACCAGUAAGGAGACUUGAAAU  
>P167  
CAUUUAAACGUUAUUUAGAACUGCACUUUGUCCACAACCU  
>P168  
AAGUGGGGCUCAGACACAAGACCAAUUGAGGACUAGAUAA  
>P169  
UCAAACGUUUGAAGGGACCAACGGCCAACAUCACCCGGGA  
>P170  
CCGGCCACACUGGGCCUCUCAUCUACUCUUAGCGGGGAUCU  
>P171  
GCAUGUGGUUUUAAAAUAGACAGUAUUUUUAAAAUCA  
>P172  
UUUCAGGAUGGGACUUCAGACCAAGGACACAAGUUGGGCU  
>P173  
UGAGCAAGAGCUCCAGCAGGACGUACGCCAAGCGCUGACGC  
>P174  
GUGACUCUCGCUUAGCAAAGACUAGAGAUGGCCUGUCCGUG  
>P175  
GUGAUACAUGGAAGGAAAUUACCAUGGGUAAGAAGCCCAGU  
>P176  
UAAAAGAGGUAGACGCGAAACUGCAGUUACGGUGACCAAU  
>P177  
UGC UUAGCAGCCAAUACUUGACUUCUUUUGGAAGCAGUCUU  
>P178  
AGUCUGGGCAACAGGGCGAGACUCCAUCUAAAAACAACA  
>P179  
UGUUGUGAGGACUGAGAAGACAAUGUCAAAUGUUUUUAU  
>P180  
CUACAAAUCCAAGCAGAUUGACUCUAAAAUAAUCUAAA  
>P181  
UGUCCCUCAUGUCAUUCAAACUGUUUCCAAAGGGAUUUG  
>P182  
GGACUCGCGGGAGAGAUGGACUCUGUCCUCAGCAACACUC  
>P183  
CCAAGGAGGACUCCUCAUAAACAUUGACAAAUUGCUCUGCC  
>P184  
GGCCCUUGUCCUCAUAAAAACUCUCAGUACAGCUUAAACU  
>P185  
GCUGUAACCUGAGAGGAAGUAUCAGGUAACGCAGGUGUCGG  
>P186

CGUUUUUAAUAAGGGAAGAAACUUUCCUACCAGAAAGCUUU  
>P187  
CCACAGUAAAUAUAUGCCAGACCUUACCCCGCAGUAUGUAG  
>P188  
GAUCUUUGGCCUCUUGUUGGACUUUUUCUACACUGGUCACC  
>P189  
UUGCUGGACUGGCCUGAGAACUGGGAGGGGAUGGCUUCAU  
>P190  
GGACGUGGUAGAGGCCUAUGACCCAGAGACUCGCGCGUGGA  
>P191  
UUAGGUGCCUAAGCAAAAGGACAGGCUGUCCAAGGUAGAAA  
>P192  
GCAUCGUCCGAGACACUAAAACCCAGCCACUUCACUGUGGCC  
>P193  
GGUAUCCAGUCAGCCAUGAACACUAGCAUCGUCCGAGACA  
>P194  
CAGUGC UUAGUGACCCCAAACCCAGGGCCAUCUAUGAUUA  
>P195  
ACACUCUUUAUAUACCGCACAGUAGCUGGGUUCUCGAAGA  
>P196  
CAAGAGCUGUUGAGUCCUAUACAUUCACACGAGAGCUUUA  
>P197  
UCCAAGUUAGAAGAUGAGAGAAUAAGGCACGCGCAUGAUUC  
>P198  
AAUGGUUAAGAAUCACAAGGACUCCCUCUCCACCUCCAUU  
>P199  
UCAGAAACGUGCCAAAUGGAACUCAAGGUGCCCUUCAGAA  
>P200  
GUGCGUGCUGGCGUGCGUUCAUUUUCAGCCUGGUGUGGGGU  
>P201  
CUGUGUUCGCUCUAAACAAAACAGUGGUAGGUUAAUGUGUU  
>P202  
UUUUUAGACUGUAUUAAUAAACAUACAACACAAGCUGGCCU  
>P203  
CCCAAAGUACCGCCAAGAGAACCUUUGUCACCGAGUAACUC  
>P204  
AGAGUCCCAUACCUCCUAGACCAGUAAAGCCAGAUUAUAG  
>P205  
UUCUCCUAACUCCGAUGAAGCAAACCUGAGGUUCCCCCA  
>P206  
UCCACUGACACCCAUAAAAAACUCCCCUCCCUUUUCCCU  
>P207  
UAGAUGGCAUUAGGAGGCUGACACACAGUAAUACUAGUAG  
>P208  
CUAGCAAGUAGGAAGUUCGGACAGUUUCAUAACAUGGCCCA  
>P209  
CUGUGGGCUUGGGGUUAUGAACAAUGUAAGUAGAAGCAGAG  
>P210

CCCCUUCUACAUGCCCCUUAACCCACGGACCCCUGCUGG  
>P211  
GGAGGUGCCGCUGUUCCACAGACGCUCGCGAGCAACCCUC  
>P212  
UUGGAUUAAGCAGAUGGAAAACUUGAAUGUUGCAGCAAGUA  
>P213  
CAGCUCGAGGCCCCCGACCAACACUUGCAGGGGUCCCUGCU  
>P214  
ACGAUGAGCAGGAUCCCUGACUUUUUUUAACCCCUAGA  
>P215  
GUUUA AUGGCGUACGUGGGGACUUAGCCGGAGCAGGAUGAU  
>P216  
CACGAACAUGUUACCAUUUGACCGUUGUUAAUGGCGUACG  
>P217  
UGAGGCCCUAGAGCUCGGGACAAUGAU AAGACUCGCUAUA  
>P218  
CCAUGCCAGGGAGAUCUUUGACUCUCGCGGGAAUCCACUG  
>P219  
AUUGGUGGAUAGAUGCAGAAACAAGGAAGAAUGGAGUCUG  
>P220  
CAAAGUCGGUUUCUCUCUGGACUGUUUACACUUCAAGGCGG  
>P221  
CGGGGACUCAAGGGCAAAAAACUGUAUCCUGUAGUGAGUGC  
>P222  
UGGCUUUAUACUUCUGAAGACACAAUAGCUAAGACCCAAA  
>P223  
ACACAAUAGCUAAGACCCAAAUUGGGAUUAGAUACCCACU  
>P224  
AGGCGUAGUCACAUCUUUGUACUGUACUCCCCUGUCUCACC  
>P225  
ACCCAGCCAGUUGGUAUUGACCUUGGAGGGAGAAGACCUC  
>P226  
UUAACUCUCCGUUCCGGGAAACUCGCGGAUAAGAAGGUGAU  
>P227  
ACCAUCUCGGUGUGGAUGAGACAUGGGCCAUCGGCAGGAA  
>P228  
AAGAACAUCAUAUAAGCUGACCGUCACUGCCUAUGACUGU  
>P229  
GAACUUGUUGCGACAGAGGGACUCACUGGACUCUGUUCGUU  
>P230  
CAAAAUGAAAUGUAUGAUUAUACAGUCCGUGAAAAGGCU  
>P231  
AAUGAGGACCCCAAUGCCAAACUGGUUCGUGAAUUAAGGA  
>P232  
GAGCAACCCUAAACACAGAAACUCUUGGAGUCCUGGGACAC  
>P233  
AGUUUAUCCACACCAACUGGACAGGCCAUGGUGGCACCGUG  
>P234

GCGCACUCUGAUCAACUGGAACCUCUGUAUCAUGCGGCUGA  
>P235  
AGUUUCCUCUCUACAAAGUUACACUGCAGCAGCUGUCUACC  
>P236  
UUAGCCCACCAGCUUCAGGACUUCUGCCAAUUUUGAAUGA  
>P237  
CAUUUGACUACCUAUGUACUACUCUACCCCCUGCCUUAGAG  
>P238  
AGAGAGGUUUUGAGACAAAAAAAUAACAGAACGUGAAACC  
>P239  
GCUUCGGAGGAAAGCCAAGGAGCCGGACCAGAGAGAAAACU  
>P240  
GAGGAGGCGGCCCUAGCGCCAUUUUGUGGGAGCGAAGCGGU  
>P241  
CACAGAGAUAGUCCUGGAAGACACGUGGCGCCUGUGGACCG  
>P242  
UGUUUGCCUGGAGGGAUAAAACAGCUCGCAGGGAAGAUGAA  
>P243  
UUAAGGAUCGAAGUAAAGUGACUGAGCUGGAAGACAAGUUU  
>P244  
AAGACGACAUGAGCCUACCGAAAAGUAGGAGGUGCGAAGG  
>P245  
ACUGAUGCCCAAACUGUCAGACUUUGGGGGAUCCCCGCCUA  
>P246  
CCCGGCUGAUACCACUAAAAACCAUGACGUCGGACAUUUUA  
>P247  
GCAGGAUGUCCACAUGCAUGACCCCCGGCUGAUACCACUAA  
>P248  
GAAACGAGUGUGAGUCUGAAACCAAUUUUUUGAGGCCUUGC  
>P249  
CUUCAAGUUUUUGGGUAAAGACACCUGGAUCAGACUCCAAG  
>P250  
ACUUUCAGCGACAGCUAUGGACAGCAUGGUACCAAGGAGUU  
>P251  
UGGGGGAGAUGAGAGAGAUGACUACAGCAGGCAGCAUCCUC  
>P252  
AGUCUUGUUAGACUUUAAAUAAAAUCCGUGGGGGAGGGGC  
>P253  
GCAGAUGCUCUUAUGUAUAUAUUAAUUCCAGCCCUUUGUA  
>P254  
UGACGGGACCACUACUAAAAACCUAAAAUAUCUGUGAAUG  
>P255  
CAAUUUCAUAUUGGUUAAAGACUUAGGUCAGGGCAUACAGA  
>P256  
CACCAUCCAUCUAAGGACGACAAAAGAACCAGGAGGGCGG  
>P257  
UGCCUUUGUGGAUUUUGUGGACAUCAAAGUGCACAGAAAG  
>P258



AAGUGAACUAUUGGCGAGCAACUGUGCCUCCUCAUUCGUU  
>P259  
AAAAGACAGAUAAAGAACGAACUUUUGAUCCGGAGAGAGUG  
>P260  
CUCGUUCACGAGGUAGGCAAACCCCUCAAGAUGUCACUGA  
>P261  
AUUUGAUGUGAGUUUCCCAAACAGCAUAAUUAAGAGAGUA  
>P262  
AGGGAGUGAACAGAAACGUGACAGAAAAGAUGCUGGCACAG  
>P263  
AAGUGAUCCAGUUGAUCCAGACAAGGAACCAGAGAAAGAAG  
>P264  
CAUCGGCUCCAUCAUCAUGACAUUUCUGGGGAGCCAGAAA  
>P265  
AGACUCUUAACGCAGGAAGGACUUCAAACUUCUGCUGAGAC  
>P266  
GGACCCACACAUAUGAGGACCCAACCAGGCUGUGUUGA  
>P267  
CUGUACUCCAGCCUGGGGUGACAGAGGAGAUGCUGUCUGA  
>P268  
GCGCCUGUUCACCAAGAUUGACACCAUUGCGCCCGAUGAGA  
>P269  
UUCUGCUGGGCAAACAGUUUUUACCGCCCGUCGUGGCGA  
>P270  
AGACUUCUCCAUCGCAAUGACCUGUAUUAAACACAAGCCC  
>P271  
GAAUUCUGAAAGCACCUCUGACAUUCCUUUUUAUUAACUCAC  
>P272  
AUAAUUUGUGGUAGUGGGGACUGCGUUCGCGCUUCCCCU  
>P273  
GAUUUCCCCAAUUGUGGGAAACUCGACUGCAUAAUUUGUGG  
>P274  
AUUGCACUCCGGAUGUGCUGACCCUGCGAUUCCCCAAU  
>P275  
AUAAGCCUCGCCUGGGAAAACACCUUCGUGAUCAUGGUA  
>P276  
CUGUGGCUCUUGUGCAAUGACAUCAAUGGAGGCAACACUC  
>P277  
GGGUGGGGCAGAGGUGGGAACAUUUGUAUCAGUUGAGUCA  
>P278  
CACAUUCACUCUGCACCCCGAUGUGCCCGAUGCAGACCUCA  
>P279  
UAUGACUGACGGAACAAGUGAUGGCGUGACACCCUUAAGGU  
>P280  
GCUGGGCUAUUUAAAUGAGAACUUUGAAGCUCCCCAGAAGC  
>P281  
CUGCUGGAAGCCCUGCGGGAACACCCUGACGUAAACAAGAA  
>P282

CAAUAAAUCAUUAGUUUGGACCUUCCUGUGGCUGAAGUUU  
>P283  
CCAGCUGACCUCAGUUUUUAACCCUAGAACUGUAGCAUCAC  
>P284  
AUCGGGCCUGGCGAUAAAGAACAAGACUGUGCCUAAAAGU  
>P285  
GGUGUUUUGCAGAGAGGAGAACUUAUCCCGUAUUCUCCAG  
>P286  
GGGAGGUUUUAUCCUUGGUGACUCUAAUGGUAGAUUUUUGU  
>P287  
GGAGACAGAGGUUGCGGUGAACCGAGAUCGUGCCACUGUAC  
>P288  
CUCUCCACAUUCCAUAAGAGACCGUGUGGUUUUUGUUCACC  
>P289  
GCUAACCAGACACGCCGUGCACUCGUUAGAUUCCUUUCUUA  
>P290  
ACUGUGAGUGACUGCUCCCCACACAUAGCCAACAUCGGGCG  
>P291  
ACCGUGGUCGCCGUCUGUGAACAAAGAUUCCUAAAAUAAUU  
>P292  
AUCUCAAGCACAGACAGGAGACAGUGGACUACAUGAUAAAG  
>P293  
GAUCGAGACUAUCCUGGCUAACACGGUAAAACCCUGUCUCU  
>P294  
CCUUUCUCUCCAACUGUAAACACAGAGACAGCUUUGGGAA  
>P295  
UUUCUCCA AUUUUAUCUAAACAGUUGCAGAGAUUUUUAUA  
>P296  
UCUGUCUCCACUGUAGAAGACAAGAGAAUGAAACUCCACC  
>P297  
UCUCCGCCCCCGCCGCCAUUACGGAGCUCCAGUGGUG  
>P298  
GGGUUUCAUCCUGAAAGAGACCCUCUGACCUAAAAAAG  
>P299  
AGAUGCAAAGAGAUUCAGAACAAAUAAGAGGUAGAAGCAG  
>P300  
GGUCGGGUCAGGACCCUCAAACACCAUCUGGGAACACCAAG  
>P301  
UUGGGGAAACUAUUUUUUAACACUGUGGAAUACACUGGAA  
>P302  
AGAGGUGCUGGGCUGCACGGAACCCAGGUGGAGAAGCGGCUG  
>P303  
GCCUGCUACGAGGGCACGGAACUGGUCGGGUCGCACGCUAC  
>P304  
UGAACUUUUCGGGAACUGGAACUGUUUAACUUGAACCCAGG  
>P305  
CAGAGGGGAAGAGGAGUUUGACAUGUUAGGGCAUUAAGCA  
>P306

UAAUCUUUGAAUACUUGCUGACUGCUAAGAAAUGACCAGAG  
>P307  
ACAGUCUGUUUUAAAGGGAUAACUAUGGGUGCUGAGAAUAGG  
>P308  
AUCCUGCCAGUGGCCCCCAGACUGUGGGGUUGGGACGCCUG  
>P309  
UUCUUCACAUGGGGCAACCAAGGCUAAGGGAGGACAGCAAC  
>P310  
UGACGUUUUGCUGCUCAGAACCCACCGAUCUCCAAGUUCU  
>P311  
ACUUGGGAGGAAAUAGGAAAACCUUCGGUAUUUAAUGGUGA  
>P312  
GCCGCUUCAGCAAGGUGGUGACUAUUCUGGUAACUAUGGUU  
>P313  
AGCUGCAUGAAGGAGGUAAGACUUGUGCUAAUUUUUUUAAG  
>P314  
CGAUCUGGGUAUCAAAUAUGACCCAAGCAUUGGUAUCUACG  
>P315  
AGGGUUCUAACAACCUAAAGACUCCAGAAGGGAAAGUCAA  
>P316  
GUCCCAUACUCUGUUCUUGAACCCGUUUUGGAGAGGUGUAC  
>P317  
UUUAAUUAAAGGAACUGAGUACAUUACCCUGAUGUCUAAA  
>P318  
AUCUAGAAAUGUUAGUAAGAACCAACAACAGCUAACAGAC  
>P319  
ACCCCAAAAUAAGUAUUUAACUUUGCAUUAGGUAUAAAGG  
>P320  
AAAUGAAGUAAUACCCUUAACCAUUUAUAAUUCUAGUAU  
>P321  
GAAGAUUUGGAACAUAGAAAACACAAAAACUCACCUUAAAA  
>P322  
CCCCAAAUUUUUAUUGCAAACUCCAAAACACCAAUACCAU  
>P323  
CCAGGGAACUGAAACAGCAGACAGGUUAUAGAACCCCCAAA  
>P324  
UAGUGAGUGGUGAGAGGAAAACUACUAGAGUGAGGUAGGAA  
>P325  
UACUGGCAACCUUCGUAGUAACAGCUUUGGUGGAGUAGUGG  
>P326  
UGGCCAGAAAAUGGUUAUGACAGAGCAGGUAAUUGGAAUG  
>P327  
UGCAGAACUUGGCUCCCGGACCCACCCACCAUUUAUAACU  
>P328  
GGACCCACCCACCAUUUAUAACUUUCAACAGUGAAGUCAA  
>P329  
AGAAAUGUAUUUUUCAUGAACAUUUUGAUACAAAUUUCAU  
>P330

CAUGGUCACUGGGGCCUUGGACAAGUUGUUACUGACUAUGU  
>P331  
UGAUUUGCUCUUUACCCAGGACUCUGAAGGUAAUCAAGUUA  
>P332  
GAGCUCCUUUUAAGAUGUAACCAAUAACUGGAAUUGGGAC  
>P333  
CAUUGAUCUGGAAGGGUAAGACAACUCUUAGUGGGUGGGGG  
>P334  
CUUAAGGACCACCAUGUCAGACAGAU AUGCCCAGGACAUGG  
>P335  
CCAGUGGAUGAACACACCAAACCCCAAAAAAAAAAAAAAAAAA  
>P336  
GGGCUCCAGCGCUAUAAAAACUUUAUAAACCCCCCGGAGC  
>P337  
GAAAGCGAUUCACUGUAUAAACUUUUUUUAUGAAAAAAU  
>P338  
GAAGAACUUCUAGGUCCUAAACUAGAAGAGGAAGAAGA  
>P339  
AACGGAAGCAGGCACCACUAACUUAUGAAAAGGAGGAGGAA  
>P340  
CUCGGUAUCACCGUUGAUGAACUCAUUGGUUUCACAAGUCA  
>P341  
ACAAAAAAGGUGACUGCUGAACUGUGUGUGGUUUAUUGUUG  
>P342  
GGCGGUCCUUUCUGUGUGAACUUCGGCUGAAAGGGAAGG  
>P343  
GAGGACGACUGGUCCGAUUAACUCUUUCUGCCUGCUGCCCA  
>P344  
GGGACUACAGGCGCCACAAACACCCCAGAUAAUUUUUUG  
>P345  
AACCCUGAAGCUGUAAAUGAACCCAAGAAGAAGAAUAUGC  
>P346  
AUGCAGAAUAACUGGAUCUAACUGGGUACCUGAGAUUUUU  
>P347  
CUGAGUUUUUUUCGCCUUUAACCUAAGUCCUCAGGACUAAA  
>P348  
GACCUUAGGACCCUAGGCUGACCUGGAGAGAUUUUUUAAAA  
>P349  
ACGUUUCUCCCCUUUCCCUACCUUCCAUGGUCCUGGUUGG  
>P350  
GUGCCCCUUUCCUGUCCCUAACAGUCCACAGGCAAACAAU  
>P351  
GUCGUAAAAGGAGGAAAAGUAUAGUGAAGCUGGCCUAAA  
>P352  
ACAGUGAUGAAAUGCAGGGGACCUGGUAGGUUUUUUUGGA  
>P353  
UCAAGAGAUUUCGGAAGCAUAUUUUUUUGGUUUUGGGCAG  
>P354

GGAAGGAAGUAGAGGAAUGAACUAUUAUAGGUUCCUGCUA  
>P355  
AGCAUAACAUGGAUAUUGGAACUUGGGUAACAAGGGUCCC  
>P356  
GUUUUUUUUAACAUGAUACAACGGCCGGGCUUGGUGGC  
>P357  
UGGCCUCGCCUCGCAGAGGGAGGCGGGAGGGCGCGGCCA  
>P358  
CAUGAACAAAGACCCCAAGACCUAGAGAGAAGAGGAAGUC  
>P359  
GCUUUUGGAAGAUUUUCGAAACAACCGGUACCCCAAUUUAC  
>P360  
UCUUUCAGCCCCACCUGAAACAUCACCCUCAAGAACCAGC  
>P361  
UUUCCUGUCCCUCUAGAAGAACAUCUCCCUUGCUUGAUGC  
>P362  
AGAGUGAGAGAAGUAUGUGGACAUCUCUUCUUUCCUGUCC  
>P363  
CAAGCAUAUUUCUUUAAUGACUCCAGUAAAAUUAAGCAUC  
>P364  
UUUGUAUAUUGGGAGGUGACAUUUGUCCCUUAUCUCAG  
>P365  
CCAGCAAUACCCAGGAGAUGACAUUAAAAGGUGUUGAUUUU  
>P366  
GCUCACCUUUGGGUUUUGUGACAAGAAGGGGACGUGUUGGG  
>P367  
GGAAGACAUACUGAGCACAUACUGUGUGGACAAUAACCAGG  
>P368  
GUAGUCAUUGGAGAGAAGGAACCCUCCAAGGGGAUCCAAA  
>P369  
UCGAAACCUUUUCCGGUCUUCUCACGUUGCGGCCUUCUC  
>P370  
UUCAAAGGCCAAAUGGAAGAACCUUGGAGGAAAAGGGACACA  
>P371  
GGCAGGGAAGUAGAGUUGAAACCAACCCAGGGACACAUAGG  
>P372  
GGUUGCCCCAAUACUCAUGGACACCAGAACGGCAGGGAAGU  
>P373  
UGGCUGUGGAUGUGGGUGAGACUGGACCCUCACCCCUAUU  
>P374  
AAAAGAAUCUUAUAAAAGUAACUGUUGCACCAUUUAUCCA  
>P375  
AUAAGAGCUCUUUCCAUGGACACUCAGCGCUGCCGGAACU  
>P376  
AUAGAGGGAUCCACAAAAGACAAGGUCAGAGGGGGGCUGU  
>P377  
CUGGUGGCAAAUAGGGUUGACUGGAAGCUUAGACAAUGGU  
>P378

CUUUAAAAAAAAAAAAUUGGGACCAGGCACGGUGGCUCAUGC  
>P379  
CUUUUUUCCACCCUGGAGAAUUAUAGGGGUGAAAGACUAA  
>P380  
ACAGAUAAUGCCCACAGGAGAUGCUCUGGGAGGACAGAAGC  
>P381  
UAAAUGUGUCUAUACUCUAAACCUGGGGGAAGGUGGUGUGG  
>P382  
CUUUUAGCACCUUGACAUGGACCGUAUAGCAUGUGAUAAUU  
>P383  
UUUCCUUUAGUUGCAUUGUAACUGAAGAUACAUGGAACAC  
>P384  
UCCUAAAAGUCGAUCUGAAACUUGGGGUGGGAAAGGGGAG  
>P385  
GUGUCCUGUGUGAUGAAAGGAGCCUUUUUACACACCCCCU  
>P386  
GAUAACAUUUCCUUCCCCAAACAGGGCUCCUAACAUCAUGU  
>P387  
GAAUUUAGUGUGCUUUCAGAACUGAAGGGAGGCCAAUUGUG  
>P388  
GUUAAUCAUCUAACCAUCACAUAUAACCCCCCGCAGCUAG  
>P389  
CUUUGAGAAGAAGAUGGCUGACUCCACAAGGAGGAGAUGG  
>P390  
GAAAGCGAUCCAAAACCCAGACUCCCCAGCAACGCUCUGUG  
>P391  
AUGCIAAAAAUCAAGCAAGAACAGUUUAUGAAGAAGAUUGU  
>P392  
GUCCAGGAGUUAACUCGUCAUUUCCUCCAGCUAGAGGAGC  
>P393  
UGUUUCAGAAUAUCCAAGGGACUGAGUGAAAAGAUUUUGC  
>P394  
UCCCCGAACAGCAAUCAAACCAGAAUUUAGUUAAUUUU  
>P395  
UUUAGUUAAUUUUAGGCAGGACUGCUAAAAACCAAACUCAA  
>P396  
CAACAGGGUCAUUGGCAAGUACUAUGAGACGGCCUGCAGG  
>P397  
AAUGAUGCUCUUGGGUUUCAGGUGGAGCCGCCGAGGUGG  
>P398  
GACACAUAGUCUGCAGCAAGACAUUCCUAUAUUGAAGAAU  
>P399  
ACGACAAUUAUGGUAAAAACAUAUUGCUUGGUCUAAAGAA  
>P400  
UUAACAUAGAUCGAUGGUUGACAAUCCAGAGUGGUGAACAG  
>P401  
GAAAAGCUACCUCAUCCGAGACCAAAGAAUCAACAGACAUU  
>P402

AGGGGGAAAGCUCGUCAGGAACAGCUGGAACUGACACUAGG  
>P403  
GAUGCCAGGAAGCGGGCAAAACAAGUAAGUUGGGGAAGAAA  
>P404  
AGGACCAGGAUGGGGAAGAUACACGUCAGGAGUUUAUCGAU  
>P405  
UUCGGUAUCAUUUAAAAGUGACUAUGCUCGGGCAGGGCGCG  
>P406  
CCCAGAAUAUCCACUCCUGACACCAGUUGUUUAGGAAAAA  
>P407  
UGAGAUGUCCAGGAUCUGUGACUGAAGACAUUUCUGAUUUAU  
>P408  
GCCUCCAAAACCAAAAUAAAACUGGGUCACUUUACAGUCUU  
>P409  
GGACCAGCUUCAGCUUUCGGACUCUGGUUCUUGGAUCGUGU  
>P410  
GUGGGGGAGGCAAACAACAAACAUGAAACAAAACGAGACGU  
>P411  
AGCCUGUGGAGGUUCAAAACACUUGACUCACCACGGGAUGA  
>P412  
UUUAAGUGUGCCACAUGGACUUACCGAGCAUGGAGAGAG  
>P413  
AAAUCCAGGAAGCCCAAAGAACACCAAUAAGAUGAACCCG  
>P414  
ACUAAAGUUUAUGAGAUCAGGACUUUUACUUUGAUUUGACAG  
>P415  
GCUCACCCAAAAGAAAUGACUUUAAGUGAAAUUUAUCAG  
>P416  
AAAUGAGUUGGUGGAGAAGACUGGACAU AUGGCUGGGAAU  
>P417  
UCGAGGAGUUCUACAACCAGACAUGGGUCCACCGCUAUGGG  
>P418  
AGGUGUUUCCAGAAACAGAACAGGGUUGGGGUGAGCAGGG  
>P419  
AUGGCCAGCCUCCAUUUGACAAAUGGGGAAAUUGAGUCC  
>P420  
AUACAGUGAUGCAUUUGAGGACAGGCCUAUUCAGGAAGCU  
>P421  
UACGGGCGCGGAUGUACGGGACAUUCUAGAACUCGGGGGUC  
>P422  
AGUAGAGAGCAAGAGUAAAGACAUAAAUGGACCCAGAUCUU  
>P423  
AAAGAUUCCGUGGAGAGAAACCGUUUUGAGUUUCAAGCAA  
>P424  
CUCCUGUGAAUAUACUUUAAACACCCUGAGAU AUGCAGACA  
>P425  
CAUCUCUCGGGACAACUGGCACAAGCGCCGAAAACCGGGG  
>P426

UCCUACAGGGGUGGAGAGACCAGCCUUUCUCCUUUGGU  
>P427  
AAUUGGGCACCCUGCCCCCAACUUCAAGCCACAGCUGUUA  
>P428  
AGAUCAGCUCUCUCGUCUGACCAAGUUGACCCGCCGAACC  
>P429  
GGAAAGGGUACAAUGAGGAAACUUUAAAAUAAGGUAUAUUA  
>P430  
CCCAUCUAGGUGGCCACAAACUCUUUAACAACUUGAAUA  
>P431  
GGUGGCUGUAAAGGACUUAACUAUAUUGAAAAGGCAGUAC  
>P432  
UGCAUAACUGUGAUAAAAGGACAUUACAAAACGAUUUACAG  
>P433  
AGGGAGUGGACUACUUUAAACAGCACUGGUGACCUAAUGA  
>P434  
CCCAAGAGAAAAGACUGUUAACUGGAAGAAAAAUUAUAU  
>P435  
GAUUGCACAAGUACUUGGAACCUUUGUACAAUGACUAUCG  
>P436  
AGUCCUCCUCCAGUUGGAAUAUGAAUCAUCUACAGCCU  
>P437  
GACAGAUAGACGGACUCCAGACCGCCAGCUGAGACCUUAG  
>P438  
CGCGCGCCGCCGAAACGUCAGUGUCGGGCGCAGACGGCGG  
>P439  
AAGGUGUACCAGAUACGAUGACUAAGCCAGGGCCCUGGAU  
>P440  
UAGAACUCAUAGCUGUGUGACUCUGGGUGAGUCCCUAAC  
>P441  
AAUUUGACCUAAAUGACGAGACCCUGGAGUAUGAAUGCUUU  
>P442  
UUAAGAUUUUACUUGUCGGACAAACAUGCCCACGUUAU  
>P443  
AUUAUUUGUUUUUCUCCUGAAUCAAUUUUCCUCAGUAAC  
>P444  
UAUUUGCAGGGUAUCUAAAAACAUGAGGACAGGUUUAACCA  
>P445  
UGGGGAAGUCCCAAUUAAGACAGUAGUGUUUGACCUGGGU  
>P446  
GGUCCAGGUGGAGGAAUAACAUGUGUGGGCUCCUUUC  
>P447  
GGAGAGGAAGCGCAUGAGGAACCGCAUCGCUGCCUCCAAGU  
>P448  
GCUUCCAUAUAUAAGUGAGGACAUGCGAAUUUGUCUUUCU  
>P449  
CGCCGUUAGGGAGAGGGGCGAGCGCAGGAAACCCGUUUAU  
>P450



CAGGGUGCCAGGAAAUAAGACCUGAAAAGAAAUAAGAGUGGAG  
>P451  
CAUACCAUUCACACCUAAAAGACUGAAUUUAUCUGUUUUA  
>P452  
UCUCCCAACCAGCCCACAAAACACGGGGACAAUCGAGAGCA  
>P453  
UGUGCCUGUUGUAGGAUAAGACCAUCAACAGAAAAUUUACA  
>P454  
GAGAAAAAGAAGAGAAGAAACCAAUAGAAACAGGUUCCCC  
>P455  
UAGAAACAGGUUCCCCUAAAACAAAGGAAUGUUCUGUGGAA  
>P456  
UUUGUGGGCUUGUAGUUGGACCUUACACUGUUAUGGAAAU  
>P457  
CGCCAGUGGAGGUCGCCAAAAGCGGGCGAGGGCCUCCGUCU  
>P458  
UCCGGAUGGGUUGGUAGCAGACAGGGUGGAGUAGGGUUAAG  
>P459  
UUGUGAAAUUUGACUUGAGGACUAGAAUUAAGAGUGGCGAG  
>P460  
GUCAUUUCUUUCUCUUGGCCAAGAAUCGACGGAAGGGAAAA  
>P461  
CUUCCUUCUUCUUCUUAUUUGACCCCAGUUUACAUCAUUAA  
>P462  
UGGAGUAAAUGGAUAUGUAAACUGACAAAAUAUAGUGUGGA  
>P463  
GGUUAGCUUCCUCAUAAGGC AUCGUUCCGUGGGUGGGGUC  
>P464  
AGUGCCGCCUUGUGAAAGAAACCCGGAUUUGUGAGGUGCGG  
>P465  
GUCUCUCCUAUUUUUGUAUUACCCAGCUUUCUUUUUAAUAC  
>P466  
AGAUUGAAGGCCUACAAAAACAAUUGGAUAUAGAACUUA  
>P467  
UGAUUGGAGCGCUCUGAUGGACAAAAAGUAAAGCCACCAU  
>P468  
GUUUAUAUGGUUUCAGCCAGACCCUGAAGUUGAAGGAUGCA  
>P469  
ACAAAAGCUUCUGUUAAAAGACCCUACACAAAUGCACAAU  
>P470  
UGAAUGAUGAUUCCACUAACUGAGCAGUCAGUAGUUGGU  
>P471  
UUUUUCAUCUGAGCUGGAAGACUAUGGGCUUGUUGAGUGCC  
>P472  
GAACCCUGGCAUGAAUGAAAACUAAAUAUAGAAGCUCGUU  
>P473  
UUUUACUCUGGGGGUGGAGGACUGGAAAGACAAUAAGAAAG  
>P474

AGCACUAAUCUAAACACCAGACUAAUUUUUGACUGAGUAGC  
>P475  
ACCUGUGCACAGGAUUGUUAACAUCGCAUAAUUGGCACUUA  
>P476  
CAAGUUUGGCAUGUUUGAAAACCCCAAAGGAACUGGAAUG  
>P477  
AAAGUGGAAAAAAUAAAUUGACAAAUGGGGAGCUGAAAUA  
>P478  
UUAGAGCAAUGCCGCAGGAACCUUUCUACAGGUCUCAGG  
>P479  
AGGCAGAAGAUUAAAUAACCAAAAAAGUGGUUGGUUGAUA  
>P480  
GAAUUGGCCAAAAUAAUUGAACAGGUAGUACAGCACAAAAG  
>P481  
AUGAGAAUGCAAAGUAAGAAACAAUAUGGGGAAAAUUAUA  
>P482  
GUUGGAGGUAAGUGUUGGGACACAAGUGUUAGAAACAGAA  
>P483  
ACUUUUACUUCUCUCCAAAACUUUAUCCUCCAACUUACAA  
>P484  
AAUUGAAGGGGGAUAAAGGAACUUACUUUGUGGUGGAAAA  
>P485  
CAAACUCAAACUUUAUCAGGACCCGGACCUCUCAGGCUAAU  
>P486  
CUAGGUAUAGAUGCUUGAGGACUUUAUCCUGCGUUGUGUUCU  
>P487  
UGGUAGUAUGGGUAUGGUAGAAAUGAUUAGGGCUUGGGGG  
>P488  
ACUUGAAGAGGUUAUCAAGGACAUUUAAGGAAUCCUGAUCC  
>P489  
AGAACUUCAAUAUGUAGCUUACUCUUUUUUUCCCCCUUCU  
>P490  
UCAGUUUAUAGGGAGUUUUGUACAUGGUGCCUCUUGUUUCC  
>P491  
AGUUUUACAGAAGUAAUAUGACUUUUGAUUGCACAUACCA  
>P492  
ACGCUCCCGUGGUGGUGAGGACUCGACUUCCCGCGGUGAGC  
>P493  
UAUGGUGAGGAUCACGUGUAUAAUGCGGGGAGCGGGUAG  
>P494  
GGCAUGGGCAUCAAUUAUCGACUUUUGGCAAAGAACAGAA  
>P495  
GCCAACACAAAGCCAAUAAGACCUCGAAUUCAGUAUUUCU  
>P496  
ACUUAGAACCUAUCCAGAAGACAGCAAUAGUGUUAAAAAU  
>P497  
AGAUUUGGUAUUGCAAUGGAACCCCCAGAUUUUAAAGGGGG  
>P498

AGUUACUGGCAGACAUGCGGACUGGAGUGGAGUUCACCGAG  
>P499  
AUUACACAGCCCCUCAGCCAAGUGUAGGAUCUGGUUUUUUU  
>P500  
UGUCAACAUGACAGGGUGAAACUAUUCUUUUUAAGACUGUU  
>P501  
UGCUGCGCGAGGUGCGUUUUUAGCGGAAGCCUUUGCCGCA  
>P502  
ACCUCCAGUGUAGAGACAUAACUGACUUUUGUAAAUGCUGC  
>P503  
AAGUAGACACUCUCAUUUUUAACUCCCUACCCUAGUCGCCAG  
>P504  
UCUUUUUUUUUCCCCAGUAACAGUUUAAAUUGGUGCCUU  
>P505  
CAACUCACUUUCCUUGUAGUAGGAGUCUGACUGGAGCGGAG  
>P506  
GCUGUUUACUCAUUGGAGGAACAGUACCUUGGCUUGGCUCU  
>P507  
AUAAGGUGUGUGGAGUAAUGACUCCUGAAAUUAAAUGGUG  
>P508  
UGAGGAGCUCAGGUGAGGGGACCCCAUGGGGGCAGGCAGGG  
>P509  
CUCUGCACUGCUCAGGAGGACUUCGCCUAUUCAGGGUUUG  
>P510  
UUAUUGUCCCUUUUGUAGAAACAGUGAGAAGAGGAACAGAG  
>P511  
GCAGAUACUGACACCAAGGGAUCCGGGUGCCCCCCCCC  
>P512  
AAAGUUCUUACAAGGGAUAAACGUCUUGUACCCGGAGGUGG  
>P513  
GUUCAUCUUCACGUAUUGGACAUGCCACGAAAGGUUUUAA  
>P514  
CCGUUCUGUUACCAAAGAAAACCGAAAGCCACAAAGCCAAA  
>P515  
GGUAUAUUGGAACUCUUCUAACCUCCUUGGGCUAUUUUUUC  
>P516  
UCAUUGAAUGAGGGGGUUUAACAGCUUAAAGGAAAACAACU  
>P517  
AAAAGAAACGCGGUAUUCGGAACUCAACCUCUACUGUGGGGG  
>P518  
CCUUGGAACAUUUCUACCUGACAGUGGCAAGCAGCCCAAG  
>P519  
GAAGGAGAAAGUAAAUGUUGACAUUAUCAAUUUUGGGGAAG  
>P520  
GGAAGGCAAACUCCCUUGGACCUUUUGCUCAUUUUUGGCC  
>P521  
CUCCUUGGCUCGUUCCGCAACAUCUCUCGAUUAUGCGAG  
>P522

GCUGAUCAGGGCCGAGCAGAACCGCACUCUUCCCAAUAAA  
>P523  
UUUGUUCAGUGGACGGUAAAACCUUCCCCCACUCAACCAAU  
>P524  
CCACACCACUACUCCGCUGACUGGGAGGGAUGGUAGCCUG  
>P525  
CAUAAGCAGUGGGGAAAGGACAAAAAGUUUGGAGUGUCA  
>P526  
UGAUGGCAUUGGAAAAGAAAACUUGGCCAUCCUAGAGAAAA  
>P527  
AUGCCUCAAAUAACAUGGUAACACAGAAAAAGUGGAGAAU  
>P528  
CCCGCCCCCACAUGUUUAAAACUUUGUGCCUUUGACCAUCU  
>P529  
CCUACUCUACAGCAUAAAAGACUGUGGGACCAGGACCCUAA  
>P530  
CUACAUAAAAAGAACUCUAAAACCCACCCUGCAACAAAAGU  
>P531  
AGUGUAAAUCUGAACCCAGAACAUAAAAGGGGUUGAAGAG  
>P532  
CAACCCCUCAAUUUUGGUAACUUGUAAAAGGACUCACAG  
>P533  
GAUGAUUAUUCUGCCUGGGACUCGCCAACUGAUAAAGGAA  
>P534  
UGCCAUCCCCUCGAGAAGUGACUGUUACAGAACGGCUCUC  
>P535  
GGCCUUGAUACCGGAGAAAGACAAGGGAUACCCUGUUUUGA  
>P536  
CUCCCCUAGGGCUGUCCUCUACUGGCGCUCUUGCAUACCC  
>P537  
GGCUUCCAAAUCACUGCUGAACAGAUACGCCGUGGAGGGAC  
>P538  
AGUCACCCACCACACGCAGACUCAUGCACGCACACAGGAG  
>P539  
UAGGAUCCCGAAGUUCAAAAACAUGCCACCAGAUCCUCAG  
>P540  
GAAGUUAUCAACCCGGUGGACCAUAUGUAGGAAAAGAGU  
>P541  
CUAGGACUCGUUUUUUGGGACAUGGUGGAAUAAAGGUCA  
>P542  
AUUGUGAUCUGUAACCGCAAACUGGAUGCUUUUAUGUAACAU  
>P543  
CGCCCGGUUCUCCUCCCCGACAGUCUGCAGCCGGAGUAAGAU  
>P544  
CAUAUUAGUAAAAGUGGCAGACCCACGGUUCAUUGGAUUUU  
>P545  
GUACGAUUGGAAAAGCAUAAGCAAAAAGUCACAACAAGCA  
>P546

GCAGAGAGAACGGCCGUGUGACAAUCGAAUAUUAUUCACAG  
>P547  
UUUUCAGGAUUGCUUCAUGGAUUGGAGAACUUUCUAACCAA  
>P548  
UAAUAAUUAUACCGUCUUCGAUGGGGCUAAAGACUAAUCUA  
>P549  
AAUACUCCUAAUUGAUUUUUAAAGAAAAGUCUCAACAAGG  
>P550  
AGUUAAAAAAGAUACAAAAACAAAACCUACUAGUCUUGA  
>P551  
AAUCCCAGCCUUCUAUAUGGACACAAGUCAUUUAUUCAAUA  
>P552  
UUCUCCAGGUAAGUCAGGGGACUAGAGCAAUGCACCCUCAU  
>P553  
UGUCCCAGCGGCGCCCCUC AUCACCGUCGCCAUGCCCGGA  
>P554  
AAGCCGUCGACCCUUGGAGACCCCAACAAACUGCCAGAAG  
>P555  
UGAAGCCUGUGUUGGUAGGGACAUCUGAGAGUAAUGAUGAA  
>P556  
AAA AUGGGUGGAAAUAACCACAUGGGCCAGUGGGGCCUC  
>P557  
GAUUGCAGCGAUCCUACAUA AAUAUAUGGAGGUCUCUGUCU  
>P558  
CUGCUAGUAAGUGACUGAUA CAUUUA AACUGGAUCGGUC  
>P559  
UUUGCACCCUGGGAGGAAGGACCACCCCGGGCCUCUAUGC  
>P560  
ACAAAUUACAGACAUUUUAGAGAUGGGGAUUGGGGAUUAU  
>P561  
UGUAGGGGUAGGGUGUUGGACAGAUUUGAGGGGAAAUUA  
>P562  
CACUGCUGGCUUCUAUUGUGACCGGUGCAAAGACGGAUUUU  
>P563  
AAAAGAAAAAUCCAUCAGGACUCUCCGUCCCCCGGGGCC  
>P564  
AAUACACACCACAUUUAAAAACUGCCUAGGAGGUAAUCCAA  
>P565  
AUUUUCCA AUUUAAA AUUUACAACACUCUGGCUUCUGAUU  
>P566  
UUGAUUAUGAAACAAAGAAAACUGCAAUUGUGGUUAUACAG  
>P567  
AAUAAAAACAAUAGGGUAA CAUCCCCAAAACCCACCUU  
>P568  
AUUUGUUGAAACCUGGGAAACUUAUAAUCAAAAUACCAA  
>P569  
AGGAAAUGGUUUGUGUGUAGACAUGGAGUUGUGAAACCCAG  
>P570

GGUAUAUUCAGUGCAUUCCCAAACGCAAUCGCGGCCCCUUU  
>P571  
UCUUUCUACCCUCUAAUUUAACAAUGCAUAAGAGUCAUAA  
>P572  
UUAACAGACAUUCAUUAUGGACUUCAGAGAAAAUGAUGCUA  
>P573  
CAUAAAAAUGUGCGCCAACAACGGCAGGCGGCAUCUAAAGC  
>P574  
UCGGCUGGUUUGAUUCAUCCAUUUUGAAGAGACGGGGGAGC  
>P575  
AGACAUCUCCAGUGUGCCAGACAAAUAGGAGUGAGUGUAUG  
>P576  
GGAAAUGGGACUGUGAACGAACCGGAGAGCAAGAAGGGAAG  
>P577  
UGCGGUUUGAGUAUCUAGUAUCUCCUAGCAGUGGAUCAA  
>P578  
UACUACAAAGAUGUGAAGAAACCGGAAAUGCAUAUGAGGAU  
>P579  
CAUCUCCAAUCCCUUCUGUUACUGAAAAGAGGUUAUCAUCU  
>P580  
UGCCUCCAGGCCACUGAAUAACACCCAAAACAGCAAGCAGU  
>P581  
GACUCUCUUAGGAAAUCUAAACGUCUUCGGAAUAGAAAGUA  
>P582  
CUGGGUUUGACUCUAGUUUGACAUUUACUAAAUAUUUAUU  
>P583  
CUCGGUGUCAGCCAUCUUUCAUUGUGUUCGCAGCCGCCGC  
>P584  
GGAAUCAAAAUUCCUUGAGACUCUUUAGCAUUCAUACUUU  
>P585  
GCCCCGCAAUGAAACAGUGACUAAAGCCCCUUUUUGAGAU  
>P586  
UAUUAGAAUAAAUCUCUUAACUAUUUCACCGGCUCUCCAG  
>P587  
UUAAGAAACACUUGCGUGGACAGCCUCUUUUAAAAGUGU  
>P588  
UAUGUUCAGGGACAAAUUAACUUUUUCUAAAAAUGGCCAU  
>P589  
UGUGGGGUGCCCUUGAGAAGAAAUGGCGCGGGGAUUUG  
>P590  
GUAUGACUUACUAGAAACAGACGUUUCUUUCAGCCGUGGG  
>P591  
AAAGUAUCCUGGGAUUUUAAACAGUAAGGCCAUGGGUUUAU  
>P592  
CCUGCUUCUGGUUUUCGAAGACUAUUUAGUGGAACCUUGUA  
>P593  
ACACACACACACCCUGUGGACAUCCAGAGAUUGUAAUUGU  
>P594

CAAGUGAUUGUUUACUAAAAACACAGAAUUCAGCUGGGCGU  
>P595  
UAGGUCCAGCUAGAAGUGAAAAAAGACAUUAAAAAAAAAA  
>P596  
CCAACAAAUCAGGGAACGAGACUGAUAGGUGUCCGUGAUA  
>P597  
UAAUCAGAUGUCUCCAGUGGACUACUGUUUAGAGAGAACA  
>P598  
UGC GCGGCCCGCUCCUGCGAGAGGACGUUGCGUGCUCGCU  
>P599  
GGCCGAGGUUAUCGUUAGGC AUCUCCAGGCGACCGGCUC  
>P600  
UACAGCCCCGUGGGCAUGGACCACCUUUAUUUUAUACAAA  
>P601  
CGUAAGCUUAGUUUCAGAAAUGUUCCGAAGGUGAAUU  
>P602  
UGGUCCAGAGGAGCCUGAG AUGGGUUGAUUAAGUCCAUCU  
>P603  
UGUUAACUUGGGUGCACAGACUCUCACGUGGCUCUAGUC  
>P604  
UGAAUAUCCACGGUUUGGACAGCAUCCGGAAGUUUCCC  
>P605  
GAAUUAGGUUGAGAGGGUAAACUGUAGAUUCAUUCUCUGC  
>P606  
CAAAAGGCUCUGCUUCCUAAACUGGUAGAAGUCUAGUCCC  
>P607  
CCCCCCCCCCCCAAAAAAACAAACAAACAAACAAAAAAG  
>P608  
CCAAUGGAGAGAAAAACAGACUUAACAAGUGGAGUGGGUUU  
>P609  
CGAAAAGUUGGCCUUGUUUAACAAAUUGUCCAGCCAGUCU  
>P610  
CGACCCGGAGGUGCUGCUGAACAUAGAAAACCAAAGACGAG  
>P611  
AUAAAUCCGGGUGUGCCUGAACUCAGACCUAGUAAUUUUU  
>P612  
AGGUAACCGGUCAAAAGAGAACACGCAGAUUUGGGAUCU  
>P613  
UUAUUCAGAGCAGUUUUGAAACACUCUUUUUGUGGAAUUUG  
>P614  
UGAGAAAGGGAGUGACCCAGACAAAGAGAGGAAAGCCCCGG  
>P615  
UGUAGUAUCUGUUUUAUUUGACUGCAGUCUCCUUGGUGCAA  
>P616  
UUUUCUAUAGAAGUAAGAGGACCUGUUAGCAACUGUUUAU  
>P617  
CCGAGCUUCAUUGUUGGAGAUCAAUUGGAAACGCAGGGGG  
>P618

UUGUGUUGGCCCCGCAGUUGACUUUUUCAGUUCAUAUCCUU  
>P619  
UUGCGUUGUGGUAAAACAAAACUCAGGAAAGGGGGGAAGGA  
>P620  
GACACCUUGGGCACUUGCUAACAGGAACAUAGGAAAAUUGG  
>P621  
GUCGGCGUAACUAUCGCCUGACAGGGUAUCUGAAGUAAAAG  
>P622  
UAAAUGGGGGGUAGCCAUAACAUUUUUCUGGGGUAGUUUA  
>P623  
GGUGUCUGGAUGAUUCAGGACACACUACGACAGACUGGUG  
>P624  
UAUUCCCUAAAUGCUGGGAAACAAAGGUAACCCCGCCUGGU  
>P625  
AUAUAAAUAAGGGCUGUGGACAGGGCAGGGGAAGGGUGAA  
>P626  
CUGGCUAAAAGAAAUAUUGACCAUUAUUAUCAUUAUGAAG  
>P627  
AAUCUGCCCCAUUCCCCGGAUGAGCCCCGGGAGAGUAAG  
>P628  
CGUGACAUUAGGGCAGUGUAACAUAGGCCUUAUCCAAAAGG  
>P629  
GUAUCUAUCUACCCGACAGCAGCGACCGAGACCCGGUGGGA  
>P630  
GGGCAAGGACGACAAGAAAGACACCGACGUGGGCGGCGGUG  
>P631  
ACACUUUCAACGCCCCAGACACCCCCAAAUAAGACUAC  
>P632  
GUUGGAGGUGGUCAAGAAGGACUAUGACGCCUUCGGAAGA  
>P633  
AAUGAACAGAUAGGUGGGUGACUGGAUAAAUAACUUCUGG  
>P634  
UCGGCUCUAAGAGUGGGAGGACAUCCAAGAAGAUUGUCAUC  
>P635  
GGUGGGGAGUUGAAUGC UUAACAGCACCUGUGUAGGC UUUU  
>P636  
GAAAGGAAUUAAGGCAACAAGAAGCCCGGCUCCUGGUC  
>P637  
GAGACUUCACAUUUGUCUUUAUUCAGGUGUCCCAAGGCACU  
>P638  
AGCAAUAUCCCUAAAACGAAAUUUGGCAAGCCGGAUCCUAU  
>P639  
GUGGGGAUCGAAGCCUAGUAACUCCAAAUCCGAAACUACAU  
>P640  
CGCAACUAAGUGUAUUCAGACAGCCUCCAGCCAUCACGG  
>P641  
UGUUUACUGUGUGUUAUAUAACUUCUGGCUCCUUCACUGA  
>P642



GCCCAAGGGGUUAAGUGGGAACAAUCAUUAUACGGACUCUU  
>P643  
AAGUUGGAGUAAUACGGGAAUGAGGGGAAGGCUGGUGCCA  
>P644  
CGUGCUGCGUCGACAACGGUAGUGACGCGUAUUGCCUGGAG  
>P645  
CCUCAUUUAUUGGGUCUGGGACUGAAGUUUUUAGCCAGCAU  
>P646  
CGCGUUGAGGCGGCUGCGGCAGUUGCGCGCUGGGAUUGUUG  
>P647  
UUGUUUACAACAACAACAAAACACCUCGCGACGGGACCGCC  
>P648  
UGUAUAAAGAACAGGAAAGACUACACACAGCAGAGAUGAA  
>P649  
AGAACA AUUCAUUGUUGAGAACUGAUAGCAACUAAUUAUUU  
>P650  
CUGCACUCUGGUCCCUCACCACCCGCCCCCGCUUCUCCCU  
>P651  
UCCAUUUUUUAAAUAGUCCACAUCUAAGGCUCAAUACAC  
>P652  
AUUUAGAAUUUGAUGCAAGUACUUUACAUGAGAGUCAGCUU  
>P653  
CAGUCCUUCUAAACGGGGAAACAGCACAGGAAUAAAGUUAG  
>P654  
CCGGAGCGCCACCGCCGUCAGCCGCGUCUUCAAGCUAGUC  
>P655  
GGACCAGAACUCCUCCUGGACACAUCCCAAUUAAGUGAU  
>P656  
GAUCCAAGCCUCCUGCUAGAGGCUACGCCUGGCUGAGAGA  
>P657  
GUAAGA UUUAGAGAGAGGAGACCAUAUUCACUAACUUUUA  
>P658  
CCCCUUUUUUUUUUUUGAGACCUUGUCUCAUCACUGUGUU  
>P659  
CUGAUGGUUUACAGGGGAGACCCAACUGUUGGUCUCGCGU  
>P660  
UAGCCCUCGAGGUUGCUGUGAGCGACGGAAGGGCACCAAAA  
>P661  
AAGCGGAAAACGGAAGAAGAAAAACCUCCCGCGGGGACUC  
>P662  
AUGACCGGAAAGAAGGGAUGACCGCGUUUGUGGAAAAGAGA  
>P663  
CCCCUUUGGGCUGGACGGGACACACGUGUGUGGCUCAGGA  
>P664  
CGAGGAUGAUGCGGAAAUUAACCCAAGGUUGGUAACUUUG  
>P665  
ACCCCCACUGC UAAA UUGACUAGCUUAAAAAAAAAAGA  
>P666

CAUAUAAGAUGUGGUGGAAAACAGAAAGGACCAAUAGAUGU  
>P667  
ACAGGGGCCUCAUCUUAGCAAGCGUGAAACUGAUAGAGGG  
>P668  
GGUAAAAAAAAAGUAAAAGGAACUCGGCAAUCUUACCCCGC  
>P669  
AAAGAGGAACAGCUCUUUGGACACUAGGAAAAAACCUUGUA  
>P670  
AGAGAAUAGAGGGCUCCUAAACACUUUCUCCUGAGAUGUU  
>P671  
GCUAAGCCAGCUCUACCAUAACAGAGUCAGGGACUCUUAU  
>P672  
UCCCCUGUAUGUUGAGGGUUAGCAAGAGUGGGUCAUAACUC  
>P673  
AUCCUUUCAGAAAAUUCAAGAAACCAAAGUUUUUGAGUUC  
>P674  
UUCAAUGAUUUCUUGGGCAGACACUCUCGAAAGCGAUGGGA  
>P675  
UAAAAGACCCUGUGUCACGAACCCCGCCUUGGUUUUUGAA  
>P676  
AGACCAGGAGAGGAGAUACAGACCUCUGCCCACCCCAACACC  
>P677  
UUUUUUCCUCUCUACAGGUGACAGUUAACACCAACAUGGUU  
>P678  
CCCAAUUGGACUUUGUUCUUAAAUCCUUAAUUGAGGAGCA  
>P679  
CUUAUAAAAAUGUAUUUGAUACUGUGAUUUGUUCACGAAA  
>P680  
GCGAUCUUGGUAAUGUUAGGACUUCACGUUCAAGGAAUACU  
>P681  
UCUGCCACCUCUGACGCACCACUGCCAAUGCUGUACGUACU  
>P682  
AUCAAGAUUUCUUAAGUCCAAUGAGGAUCCAUGGACAAA  
>P683  
AUCUAGUUAUCUGGUGGGGACUUGGAGAAUCUUUAUAUGU  
>P684  
UGUAAAUAUAAUUGAGGGAACAGGAAUCAUGAGAUAUA  
>P685  
AGGGGGGGGGGGGUUAUAAAACCAUGAUAGACAUUUUCUA  
>P686  
GGAUAUAUUGGUACAACAUGACUAAAACUUUUUUUUUCU  
>P687  
AAAAAAAAAAAAAAAAAUCAAUCCGACAGUUAAUUAUAU  
>P688  
UUUUCUGAAAUGAAAUAUAACAAGUGGGUGAAUGUGGUUA  
>P689  
GUAGUGACUUAGCCUUAUGUACUCUGUUGGAAUUUGGCUA  
>P690

GGGGUCUAAAUAUCCAAGCCAAAAGUCCAUCAAGGCUAAU  
>P691  
AUUUUAAUGUCAACAGAGAUUGAGGUGUAGAAUAAGGUAG  
>P692  
AAAACGUAAUACAACACAUAUCUAACCAGGGUUCCCUCCU  
>P693  
CACCUUAUAUUUCUUUCUGUAUUCAGUAACGGCGAGGGUGU  
>P694  
CUACAAAUACACUAUCAUUAACUGUCCUCAUGCUGUACAUI  
>P695  
CCGAUGGAAAUUGGGGAGCAAGAGCAAGGGGUCGGCGGCCA  
>P696  
CUGGGAAAGAACCACACCUAACUACUCCUCUGGCGAGGCUA  
>P697  
UUGAGGGUCAUCUAAUGCAAACCGUUUACUUUAGAGAUGUU  
>P698  
CAGCCGCCAGCCCCACAUAACCCAGUUAUCCUUUGUAAU  
>P699  
GACUAGGGGGUGGGGGACGGAACAAGCCCCGAUGCCGGGGGA  
>P700  
AGACCAUGCCCCAAAUAAGGACAAUAUAUGUUACCUUGAAG  
>P701  
UAAAAGGGGAGUGAAAAAGACUAAGUCUAAUAGAAUUA  
>P702  
UUAGGUUUGUCAACACAAAGACAUGGAAGAUUAGAGGUUUG  
>P703  
GGCAAAAAACAGGGAUUUGACCUGAAUGUUCUGGGGGUG  
>P704  
CCCCGGGAGAUUCGUUCUCAUUUUUCUACUGCUCGUGGUA  
>P705  
UGGAUUGGGCCUUCGACCUGACCAAACGAAUAUGCAAACC  
>P706  
UCGAUUCAACGGGGUUCGGACCGCGCUGCGCUAUGGAGCA  
>P707  
GCCAAUUGGGUGCUGGUAAGACUUGUUUUUGUAACUAGCUA  
>P708  
UAUUAGUGAUUUUAAAGGGACUCUUCAGGGACUUGUGUAC  
>P709  
AACUGGGACUAGCCAGGGGACCAACACAAAUGGUGGGGGA  
>P710  
AUCAUAGUGGGUGUGAGGUGACAUUUCAUUGUGGUUUUGAU  
>P711  
GGGAUAAAAUAGUGUCAAACCUAUCCGUUGGUUUGUGUG  
>P712  
CAACAGCAGUGGUGCUGUGGACCGUGGAUCCUGAGGGUGGC  
>P713  
UGGCACGAACACCUUCAGGGACUGGAGCUGCUUUUAUCCUU  
>P714

UUGUUGAUGAGGGAGGGGAAACUUUUUUUUUUUCUAUAGAC  
>P715  
CAAGUAUUUUUUUGCUGUGGACACAGCCUACGUGGCCAAGA  
>P716  
AGACGGCAUGGUUACAUGGGACACCUAACGAGGAUAGCUAA  
>P717  
AGGAAGUUUUGGCUUUCUUGAUGAGAGAGGCCAGCCCGAA  
>P718  
GCGGCUUAUACAGUACCCUAACCUGCUACUAAUCACAGAGA  
>P719  
AAAGCUGAGGGGGUAGAAAACACUCGAGACAGGGCUGGAG  
>P720  
GCGUAAGUGGAAGGUUGUAAAGACUCUGUUAAGGGAGCCUC  
>P721  
UGUGGACAUGACCAUAAAAAAAUUUUCCAGUAGGUUUUCUA  
>P722  
CUGCCCAUAGAUGCCUCCAATAUCCCCCUCGUGUUAAG  
>P723  
AAAUAUUAUCAAUAGCAAGAAUUCUCCUCCAAAAA  
>P724  
UGCUCUCUUAUAGCCACCUACAAGCCGUACUCAUUUGCAA  
>P725  
AAAUUCCUGCUCCCUGCAAUAAAGCCUUUUUACACAUCA  
>P726  
CAAAGGGACGUAACGCAAGUACUGCGGGCAGUGUUUGAAUA  
>P727  
UUUUUUUUAAACACACAUGACCCAUCCAAGAACUAAGAG  
>P728  
UCAUGUUUAUAAGCACCAGACAAGAGAGCUGGAUCAUUU  
>P729  
UGGGAACCCAAAUUCCAGUGAUCUGGAGGGUCGGGCCACC  
>P730  
GGGUUUUAUAAAUCCAUAACUGGUUUGAUGACCGAGCCU  
>P731  
GGCUUCAGACUCCGGCGCCAUUUAGCGCGGAGAGUUUCCC  
>P732  
CAUCAACAGCACUGCGGCCUAGCGGGUGGGAAAUGCAUA  
>P733  
UUUGAAAAGCACCCCAAAGAACUGAUCAGGGGGCCCAUUG  
>P734  
AAAUUUGCAGAGAUGGAGGAACGCUUCUAUCGCUAUGGGAU  
>P735  
AGCGCCCCCUACAUUGCUAUUUUCCUCCUCCCCCUU  
>P736  
AAAAAAAAAGGCCGCCGUGACCUAUUCACCCUCCACUUC  
>P737  
AAAUGGAAAAAGUUAUGGAGGGAUGAAGGAGAUUCCAG  
>P738

GGAAGAAUGAAAAGAAGAAAACUUGUUGGAAAUUUUGGAGU  
>P739  
UACGCAGAAAGUUAGGUUUAACCAGGAUUGGGUUUUGCCA  
>P740  
AACACCAUUAUCGAGUUUAAAACAGAGCUUCUGGAGUGAGCA  
>P741  
GAGGUGGAAAUCGCCCAAUACAGGGCCCUUAUACACAGAG  
>P742  
GGAUUAUCCAACUGAGGAUAAAUAUACCCACUACCCCACC  
>P743  
GUGGCUCUACCUCAAGGAGAACACGUCCAAAUUCGGGUCUUA  
>P744  
UAACACUCUCGGGCUCUUUAACCAUCAAGUGCUGCCCACAC  
>P745  
CACCCUCAGGGGGAGUACAAAACUGUGCCCAUUUCGAACUUA  
>P746  
AAGAUUUGGAAAAAUUGUUGACUUUCGGCCGGGCAUGAUGG  
>P747  
GCAAUAUGGUGUCGAUUUGGACUAUGAAUCAAAAAGACCUUU  
>P748  
CAGAUGGAUCAAUUUAGUAACCCCAUCCAAGAUUGAACUG  
>P749  
UAACCAUUCUGUGCCCCUAACUGUGUGGCCGAAGUCGUGA  
>P750  
UCACACAGUGGGCAGCCCAAACUGAGCGCUCAGCCCAUGGG  
>P751  
AACUAGUUUUAAGAAGGAUCAUAGCGGUCCUGGCUUGCCUC  
>P752  
GGGUGAAGGGAAGUGUCUGAUGCACGGCGAGUGAACACCG  
>P753  
UAAUGUCACAAUAGAUCAAAACCUAAUUAUCACAGCCUAGG  
>P754  
GGGCAGCAAGAUGGGGAUUGAUGC UAAUGGGGGAGUUAAG  
>P755  
UGGGCCAACAAAGAACACUAACUAUGCAUGGUGCCCCAGGA  
>P756  
GUGAAGCCC GCAAGGACCGAACACCCCCACCCCGAUUUAGA  
>P757  
CUCUCGUAUCAUGGAUCCCAACAUUGUUGGCAGUGAGCAUU  
>P758  
AUGGGAGGGCUAGCCCCGGGACUUGGGGCCAAUACGGAAAC  
>P759  
UCCUCUUGUUUUCGCUCCGGAUUCUCCAUGUUGGACCCAAA  
>P760  
AUCAUUUUAGGAAAAAAAUUACGAAGAUGUCCUAAGAUGUA  
>P761  
GAAGUGUUAGUUUCUUUGGGACCCAUCUACCCUGACCACAU  
>P762

AAAUUAAAAGACAGAACAAAACUGUGGAUCAUUGCCCUCAA  
>P763  
ACUGUUAAUUUUGGGGUUGAACUUUUUUUGACAGUGAGGG  
>P764  
GGUGUCUGAAUAUACCAGGGACAGAUCAUUUUAAGUACAUA  
>P765  
AUGUACCAAGCAGUGUUCUAUCAAGGAAUUCCAGUAAUA  
>P766  
AUUUUGUUUUUAAAUAUCUGAUGACUCUCUUAGUUAGGU  
>P767  
UCCUGGGUGUGCAAUCCUAUAUGCCUGGGCAGGGUGACCA  
>P768  
GCAUCUGUCCCUCCCCAGGACAUGGGGCUCUCGGUCACA  
>P769  
UUAUGUAGUAGACAGUUGUGACCGAGACCGAAUUGGCAUUU  
>P770  
UGAAUUUCUGUAAUUGCUGACCCAAGAGGAAACACUCUAG  
>P771  
CACCAGUCUCUGAAAUUAGAACAGUAGGCGGUAUGAGAUAA  
>P772  
AAACAACCAGAAAACCCCUAACUUGUACUUGCACACUCAUG  
>P773  
UAGUGGGAAAAGUGGUACUAACCCACGAUUCUGAGCCUGA  
>P774  
AAAAGAAGCGCACGGGCAGGACCUGGGAGAACAUCCAGCAU  
>P775  
CCCCAAGAGAGGAUUCUUGGACCGCACAUAAAGAAAGAAUAC  
>P776  
GUUCAGUGCUGAGUGUCUGGACAAAAGUUGAGGGUGUUCUA  
>P777  
GGAGGGUAGGUGAAGAAAUAACUCGAGAAGCCAAAAAAGCA  
>P778  
UCAUUCAACCUACUGAAUAAUUAUAUCAGGUUGGGUCCUG  
>P779  
CCCACAGUCGGUGCUUUUGGACAUACGAGGUGCAGCGCCUU  
>P780  
AAAAUCAAUCCCAUUAUUCACUAUUUCCCAUUAACGAGAU  
>P781  
CUAUACACCAUAAUUCACAGACUAGAAGACAGUUUGCUAUA  
>P782  
CGUGGUUGCUCACCCCCUCAGCCUUGCCUUCGCCGCCGUU  
>P783  
GGCCGAGGAUUUUCUAAUUAACACACAAUAGGUAGAAGGGC  
>P784  
UUACAGGCGGUGGUCAUAGAAGCAGGCUUCCUAAUGCGUC  
>P785  
UUUCUACUUUGGUAGUUCUGACCAUAAUUAUAAUGCCCUA  
>P786

GAUGGAAAGAGUCACAAGCC AUGCGGGUGUCCUCAGGUGAC  
>P787  
AGCUCGGUUGGUGUUUCUCC AGAAGUUUCCCCUUGGGCGG  
>P788  
GAGAGAGAGUUUCCCUAAA ACUGGGGGAGAGGGAGUAAA  
>P789  
CUACAAAUGAGCAUUCUCAG ACUUGUGAUUGGGGUAUCUC  
>P790  
CUUCUUGCCCACUAUCCUAA ACCAGCUGUUCGAGUCCUCA  
>P791  
UCAUAUAACAAAAGGAAUGA AGCAGCCCCGCCUCGCAGUGU  
>P792  
AUUAGUUA AUGGCGAUACAC ACUGCCGAUGCAAUAUAUA  
>P793  
UACUGAAAUGGAGAGGUAAA AUGCCCCGGGGCGGGGUUU  
>P794  
GAAAUACCAUUCUUAUGAU ACCACCAGUGAUGAGUUGAAU  
>P795  
CCGUUUUCCGGCUAUUUGGA ACUACUGUAGAGUUUGUAUUG  
>P796  
UUAAAUGCUGGGGUUGUAGG ACACACACCUCACCUGUGAU  
>P797  
GCCUCCCUUCAAUAUGUAAA AGGGUCCUAAGGCGAGCCCUG  
>P798  
UGGAAACAUAACAAGGAGG ACUGCAUCAAAACUAAAAAGCU  
>P799  
CGUCCGGGGCUAUGGCUGUG ACUCUGGACAAAGACGCUUAU  
>P800  
GACACACCUAGAGUACGAAA ACAACGCGCCACUUUAGCAC  
>P801  
AUUUCUAAACCUUUUUUAAA ACUUAUGUGUAUGGGUGACAU  
>P802  
GAGUGAAGCAUUGGACUGUA AUCUAAAGACAGGGGCUAAG  
>P803  
AUUCCACCAGCACCACCAAG ACCUGAUUUUGAUGCUUCAAG  
>P804  
CUUCCCCUAGACUUUGUUAA ACUGGCCGGGUCUCCAGAAGG  
>P805  
CCCCCGUGGUAAAAAAAAA AUCUCUAGCUAAUACAUAUA  
>P806  
UGAUCAGCACGGGAGUUUG ACCUGCUCGGUUUCCGACCUG  
>P807  
UUAUUCUAGACACAAUCCUA ACAUUAAAAAAAAUUUGACAAA  
>P808  
UAAAUUGCGGAUAAAGAGUA ACAGUAAUAAAGCAAAGGUGA  
>P809  
UCACAUAGAAGUUAAUUUA AUGGUAAUCAGAGCUGGCGGC  
>P810

GAAGUGAGAGAGAUAGCUAAACCACUCUGCAUAAAAGAGAA  
>P811  
GUAGCUUCUUCUGGCUUGAAACCCCUCCCUGGAUUUUAUA  
>P812  
CAACAAAAACAACAACAUGACAACAAGAACCCCGGAGGGA  
>P813  
UUGAGCGAAUGGAUGUUGAAACAGAGAGGCAGCGUUGGCAA  
>P814  
GAAAAGGAAAGGGAAGAAAGACUUUAUUCUCUCUCUUAUUG  
>P815  
GGAGAACUGUUUGAACCAGGACCUGGGAGACGGAGGUUGCA  
>P816  
UUUUGUAUAGUAUUAGGGUGACUUGUGGCUGGGGGCUC CUG  
>P817  
UAGGAUAACAAGUGUUAUUAGUAGCCAAACGCCUCGAUGA  
>P818  
AACAAAGACUGUGGCAUGCUAACUAGUUACGCGAACCCCGAG  
>P819  
GGGGAAGGUGAAUUAUGGUAACUUUUAUGAUCUAUUCAGG  
>P820  
AAGUAAAUCAAAGGAGUCAAGGGGAGGGUAACCCGUUGGA  
>P821  
GCAGGAGUAGCAGGUCUGGGACAGGGGGCCGGUGUACUUGA  
>P822  
UCGGGCCUCAGCAAUUCAAACCGAGAUAAAGAAAUCAAAA  
>P823  
GGGGCCGGGCCUCAAGGGGACCGGGAAGCGAAGGAAGAAG  
>P824  
CGCCAGACUGUCCUUGAGAGACACAACCGAAGGAGGCACAC  
>P825  
GGACGGCAGCGAACUCAGCUACUUUGGCAGGAGGGGAUGA  
>P826  
AGUUCUAUUGGACUCAGAUUAUCUAGAGCUACUACAUGUAU  
>P827  
AGUUUUUAGUAAGGUUAUUAACAGAGAUAGAGGAUUUAGAG  
>P828  
AACACAGGCAGUUGGGGUGGAUAGGGUUUUUCUCUAAAAA  
>P829  
UGUCUUUUCUGCCACCGUUACCCCUCCGAGACUCCGUAAC  
>P830  
CUCCAGAGACACGUAAAGGGACAGAGAUUGGGGGACAGAAG  
>P831  
GGACAUUUUCAUCCGGAUGACCCUCACUGUCAACAGGUGG  
>P832  
AUAGAAGCCUGGUGUUUAUAAGUAUAACCGCCUCUCACACC  
>P833  
AAAAAUAAAACGUGCAACAAAUUAAGCUUUGGUUGAUUAAA  
>P834



AUAAUGGAGCAAGUGGCCAAACAUCAGAAUCGAUUAAAAAA  
>P835  
CACUUUACUGGACAAUUAUGAUGGAUCACUAGGCUCUUGGG  
>P836  
AGAUCGACCCCGCGCGUGACCCACACCCACCCACUCAU  
>P837  
AGAGGGAGCAGACAGUGGGUACCACGAUCUCCGUAACCAU  
>P838  
GAAACCUUGUUUGCGCAACAUCAGCGCCGCGGAGCCGCCA  
>P839  
GAUCAUGCAUUCAUUCAUUCAAAAGGAAUUGAGGGGAGUU  
>P840  
UCGACGGAUGCCAAAGUGGAACAGAUGUUUCAGAUACUGUU  
>P841  
ACUGGCAGCUUGAGGGUUCAAAUAGUCAGCAGAUGAGACG  
>P842  
GGAUUUUUUUUUUUUUUUGACCAGAGAAACAGCCGUAUCG  
>P843  
UUAAGGCACCACAAAACGUAUCUGUGAUACGCCGCUUUGGG  
>P844  
CCCGCUCAAGGAGAGAGAAAACAAGAACAACCCGACGUCGA  
>P845  
UUUUUCCACGUCCCACGAGACACUAUUUUCGGUUCUCUGG  
>P846  
ACCUACAUGUCUGUUCCAUAAGCACCUUUCAACGUAACAC  
>P847  
CUAGAACCUCAGCAUCCCCAUCGUCUUGGAAGCGGGGU  
>P848  
GCUCUACCUGUACCUGUUUGACUACACCGACACCUUCCUAC  
>P849  
CUGUUGGAUAAAGUGGUUAAAUUCCCCAUGCACAAGGCAU  
>P850  
AAGAGAGCACGUGCAGGGAAACUGCCCUUUAUAAAACCAUC  
>P851  
UUACGUAUUGAAACUCUAUGACAAGAUUGACCCAGAGAAGG  
>P852  
CACCUGGCAGGUGGUACGGGACAUUUUGCAUGCCACGUUUG  
>P853  
AACUCGAAAGUGAAUGGGGACACAAAGAGAAGGUGCUUCA  
>P854  
ACCACGGGAAGACCACGCUGACUGCAGCCAUCACGAAGAGU  
>P855  
CACUUCUUUGGUAUCCCUUCAGUCUGGGGCCAGAGGCCGCA  
>P856  
CCUUUUGCGCGGACCCCAUUACAUAUUUUUUUUUUUUUUUU  
>P857  
AUAUGGCUACCCUCAACAGAACUGCUGCAGGUUUAUGCAC  
>P858

ACCUGGUACAAAGUUUUCAGACAUGGGACAGCGGUCCUGU  
>P859  
CCACCGCACUAGGCCGCCGGACACUGUCGGGUCGUCUAAA  
>P860  
GUGGUCUCACUAACCCCAAAACUGCGCUCGACCCGGCUGCG  
>P861  
CCAGCUUAAAAUAUAUUGUAACUUCGGGAUGUUUAUUUAA  
>P862  
CGUGCAUGUUUCUCCUCAGGACAGUAAGGACACCCACCA  
>P863  
UGACACGCUCAGUUGAAAUAACAACAGACAAUAUUUUAGAA  
>P864  
GAGGUUUCUCGACAGCAGGAACUAAUAGAAAAGCAACGAAG  
>P865  
UGCUCAAUAAGUCAUUGUUUAUGACCCCAAAGAUGAUGAAA  
>P866  
AAUCACCCCAAAGGAGUGGACAUUCCUAACAAUUCUGUA  
>P867  
AUGGGGGAGGCGCACAUUAAACAUCCAUGAAGCGGUAUG  
>P868  
CCAACCAUCCCACAUCACAAACUUUGGUUUGGGGGACUUUA  
>P869  
GAGAGAAACCCUAUGAAUGUACUGAGUGCGGCAAACUUUC  
>P870  
CCCCCAACCCAGGAGUUGGACCGGGACUCGGAGGAGGAGG  
>P871  
CCUGUCUCACACCGUAGUGUACGGCCCCUCCCGCAAAGCU  
>P872  
GCCAACAACCCCGGCUUUAACACCGCUCGUCUCUACCAG  
>P873  
CAACUCCCCACGAUGGUGAACCUCCUGUUAGGCAAAGGCA  
>P874  
CAGGAUGGAUUUUAACUCGAACAUCGCAGACACAAAACUGA  
>P875  
UUGUAUCAGCCAAUGCUGAGACCUUCUCCCCGGAUGUCUGG  
>P876  
AUGGGGCCCGCCAGAACACAGACAAGGGCAACAACCCCAAGG  
>P877  
UUCUUUUUCAGAGCCAGGAACCAUUGCCGGAUGAUGAUGA  
>P878  
GGAAUUGGUGGUGGUGGUGACGGUGGGAGUCGCCGUGUUA  
>P879  
UCCCAAGGUGAGACUGGAGACAAUCUAUAUUUGCGGAGUA  
>P880  
AUUUUAUUUUUUGGGCCAUAACCCCAUACCCCUUAUUGCUG  
>P881  
ACUUACCUGAGAACCAUAGGACUGUGGCAAACAAAACCAAU  
>P882

ACUCGAGGGACAAGGAACAGACUCAUAAAUAUUAUUGGC  
>P883  
AUGGGAUCUGAUCACAUGUUACUGUCGAAAGCCCUUUGCAG  
>P884  
CUUAUUUCCCGUGGCCAGGACGCAUUUCUCUGAGUGGAAA  
>P885  
AUAGGCGGGCACUCCGCCCUAGUUUCAAGGAUCAUGUCUG  
>P886  
AAUUUUUAUAAAUGUGACGAAACUGCCCCCCCCCCCCCCA  
>P887  
UAGUGCUGGGUCCACUAUGC AUGGCGGAACGGUCCGGGCGC  
>P888  
UGGAAACGCAGAGGCAGAAACCAGGUGUGUUUCUACUU  
>P889  
AAGUGCCGUCAGAAGCGAUAACUGACGAAGACUACUCCUGU  
>P890  
CUAUACCUUUUAAUGAAUUGACUUUCAUAAAUUGGUUAUGU  
>P891  
GCGCUUUAUUGCAGGGCUCGACCUGGGUAUAGGGGAGCAA  
>P892  
CUCUCCACUCCCCAAAAGGGACCCAGCACCCAUCCCAAGGA  
>P893  
GAAUUCUACCUGAGUUUGCCAUAAAGUGCCUGCCCUCUAGC  
>P894  
CAGGAGGUUGCUAACCCAGAACACUAUAUAAAACAUCCCU  
>P895  
UUUAAAACAGCACUAAAUAACUUGGGGAAACGGGGGGAG  
>P896  
CUCAAGAAUCGCCGCGGGGACCGCCUUCGCCUUCGUUGA  
>P897  
GGGUUGGGUACAACGAGAGGACCGGGGUGGGGGCACCUC  
>P898  
AGCUGUGAAGAUCCCCGAGACAUGGUGGUUUAGAUUGAG  
>P899  
AAUAUCGAGGCCAGCUGAGGACUAAAGAGAAAGGUGGUUG  
>P900  
UCUAGAAAGGACAGCACCCCAGGGGGCCCGUGCCGUGGGCA  
>P901  
CUUUGGGGCCGGCUGGGCAAACCUUGAACCCCAAUUUCUG  
>P902  
ACUCCCUAAAAGCGGUCUGGACAAAAGCGGCUACUUCGAGU  
>P903  
AACACUUAGAAGACAUCUUAACCAGUUGGCCGGGUAAAAA  
>P904  
AUUUCAUUUGGGGCAAAGAAACAACGUAGUUUUGUUUUUGU  
>P905  
GUCGGUCGGUGUGGGACAAAACACAGAUAUACAGCAGAUAG  
>P906

CUAUUGGUGGGAAUGACGGAACUGGGGAUUGCGAUGAUUGA  
>P907  
CCAGCGUGAGUUGGAGGAGGACUCUUUUGGGCUGGCCAUGG  
>P908  
AUUUUGUUUCACGGAAACAAACUCGUUCUGCUGUCAAUCUG  
>P909  
GGUGAUGGUUUGCCCGCGUACAUGGGCUGAGGAAUGUUCA  
>P910  
AAAAAAAAACCCCCACAAAAACUGUCCACCAGAAAAUAA  
>P911  
UUGAUGACAGUAGGGAAAGAACCAUUUCCUACCAUUUACGU  
>P912  
UCAAAAACUUGCAUGAGGGGACUCCUCAAAGAGUUUUCU  
>P913  
UGUGUGGGCCCAACCAGUGGACAAUGGAGUCUGGGGGAGGG  
>P914  
GCUAGGAGGAGGCGGUAAUUUGCGGCCCGGGGUCCCCC  
>P915  
CCCCGUUUUGAACAUUGUGUAACCGACAGUCUGCCUGGGCCA  
>P916  
CACCAGGGGAAGAAGAAGAAACAGAACAAGAAUCGCAUCUC  
>P917  
UAGAGACCCACCUCUGUGAACUUAUUUUUCUUCUUGGCC  
>P918  
CGUCUUGGUUCGGGCCGGGC AUAAAAGGCUUCGCGGCCAG  
>P919  
UCGCUGCCCCACAAGUCUGAGUCCUUCUGGUGAGGCCAA  
>P920  
UGUGUAACCUCCCCGAGCUAACCGAGGGCAACCUCCUGAAG  
>P921  
CCGCAGGAAGUUGCUGCAAAACUUUUUUGGGGGUGCAGCC  
>P922  
UUUAUUAAACCCCGAUCAUAACCUCCAGCAGGCAUUUCAU  
>P923  
UCUCAGUAUUUGAAUAUGGAACAU AUGCACAGGGGAAGGAA  
>P924  
GGUUUUGAGGGCAACAUUGACUCAUUUGCCCCUCCCUCU  
>P925  
UAGGAAAGAAUCAUCAAGGGACUUAGUUGGAGCUUCUCUA  
>P926  
UGAUGUGUUGUGCUUUUUUAACCAAGGAGGGCCAGUGGAU  
>P927  
GAUGACCGACCCCCAAGAAACCCCGCCAUGGAGGCUUCAU  
>P928  
CUGCCUCCACUUUCUUGGGACUUGGAGGGAGGUGGAACAG  
>P929  
UAUUAGAAGCCCGUGUUGGAACCAUGACUGUGUGUGUGU  
>P930

CUUAAUGCCCGGACACGGCGAUUGGAGCGUCGGGCACAUUC  
>P931  
CUGGUCUGAGCCCAAUAAAGACUGUUAUUCUCAUGCGUU  
>P932  
CCGGUUGCGCGGGCCCUCGGACCCUCAGGGUAGGCGAGGGU  
>P933  
GGUCCCCUCCUGGGUUUCUUACGUAGUUGAUUUUCCUCUU  
>P934  
GUUAUCUCAGGGACAUUCAACAAGGAGGAGGAGUCAUAG  
>P935  
CGCUUUUCUGAAAGGUCUGGACCGCCUCCAUCUCCUCCUCG  
>P936  
AAAAAUUUCAGACAGAAAUGAUGAAUCUCUUAAGGCAGUC  
>P937  
CACACGUGCUCAGGCCCCUCACCAAGGAAGGCAGCAGGCC  
>P938  
CACACAACGGGGGAGAGAAGACAGGGUUGCUGCAAUAACAU  
>P939  
CACAGCGACAAUGACAGCUGACAAGGAGAAGAAAAGGUAAG  
>P940  
UUUUUAUUUGCAGUUUAGGAACUAUUAGGAAUGUCAGGACU  
>P941  
UCUUAUUCaucugugagaguAUUAUCCCCUGAACAAAGGAU  
>P942  
UUAACCAUUAACUUUCUACACGUGCUGUGUGUAUGUG  
>P943  
UGCCAAUAAGUAAAACAGAAACAACAAAAUCAGUGUUUAG  
>P944  
CUCAUCCAUAUCUAUCUCCAUUUUCCAUAUGGUACCUCU  
>P945  
GGUGGCGGGGAGUUCCCAGGACUGCACAUAAAAUUAUUA  
>P946  
AUAUGUCCAUAGCACAUGACUAUAUAUAUGUAACAGACA  
>P947  
GAGGCUCCCAACCCUUCACAGGGAGGCUAGGAAUCUAUUU  
>P948  
GUUUUUUGAUGUUUGUGCGGACGGUGAACCUCUAGGGCGGA  
>P949  
AAAACACAAAUGUUUUGAGGACAAAACAUUGAAUAUUGUA  
>P950  
ACGUAGCCAUUC CCCAGGUGACCUCUGUCGAAUCAAGCCC  
>P951  
GAUUCUGUGGAAAUGGGUUAACCUUUAUACCUUUUAAGUA  
>P952  
CUAACAGAUUAGGGGCUAAAACGAUUACUGACUUUCCUUGA  
>P953  
UGGAUUUAGAUCGUAGUGAGACAGGUUAGUUUUACCCUCCG  
>P954

GGGGGGCGGGGGGAGUUGAACA AAAUAAAAGCAAGUCAAU  
>P955  
GUAACUUGCUGUAAGCCCUGAUACUCUCUUAGGGUAUCCAA  
>P956  
AGUUUGCUGAGAGAAAGGAGACGACAGCGAAAAAAUAGGGA  
>P957  
GCCUAGGGGAAAGUCCCCGGACCUCGGUCAGAGAGUGCCAC  
>P958  
UUUUAUUUUUCAUCUCUAGACUGUCAAUUCAAGUACAAAA  
>P959  
UUCUCCCUACAGAGCUUGAUUUUGGGCUUUAAGCAGGAGAG  
>P960  
CAGAGUUAGCCGAGGCCGCCAUUUUGAAUAAGCGACCCGGC  
>P961  
GUAUGUUUGAGUGGGUGGGAACAAGUUUUGUACAUGGCGAU  
>P962  
AUUUAAGAUUCUCACCAUGC AUUUCCUUGGUCUCUCGCAU  
>P963  
CAAAGUGGAGGGGGGAUGAGAGCCGCAACAAGGUUCCUUA  
>P964  
AGAGAGAAAAAAUGUGUCUAGGGGAAUCCAAUUGUUUAAA  
>P965  
UGGGUUCAUUUGCCC GGUGAACUCACUUUAAGCAUUGGAUU  
>P966  
CGGGAGGGCCUUGCCGUCCCACCCUCCCGGGAGCAGGAGGA  
>P967  
GCCCCAGACCCAUCUCUUGGAUUGAGGGUGUGUGGGCUGGA  
>P968  
GAGGGGGAUAAUACUUAGAACCUAUAGAGAGUAAAUCUGA  
>P969  
AAUAGCUGAAAUCUCAAGCCAGUAAUAAGGCUUCCGUCUU  
>P970  
GAUUUUUAAGCAAAGAAGUGACAGGUUUUAGAAGGAUCUCU  
>P971  
CCCACCACCCUGCCCAGCUAACUUUUGUAUUUCUUAGUAGA  
>P972  
GGGGGGGAGGUGAAAUUUUUAUUAUGUGCUUGGCGAGGAGU  
>P973  
CUGGGGGGAUCCUGGAUUUAACUGGCGACUGUUUUGGGGGA  
>P974  
GUGUUUCUGAGAUUCUCCGGACCUGCAGCACUUUUACUUA  
>P975  
CCGCCACCGUCAAUAGGUGGACCCCUCCCGGAGAUAAAAC  
>P976  
UAAAUAAAUAAAUAAAUAACCCCGGGCAAGACUUUUCUU  
>P977  
AAUGUGGGGGCCUUGGGGAGACUGUUCGAGAACGUGCGGUG  
>P978

GGAAAAUUAUUGGGCUAUCAAACUCGCUACUAAUGCUGCAGU  
>P979  
UAUGACCAUCAGCGCUUCUGAUACCGAACGCCGGCUUCCAA  
>P980  
UCCCCGUGAAGAGGGGUGAUACUGUCGCAACUCUUUCUGAA  
>P981  
GAAUAAUAAUAAAAAGCCCCAUUGGAGUGAGGCGGGGGUGG  
>P982  
AGGCAGGCCUUGGUGAAGGGAAGGGGAAUCCACUGUUCGU  
>P983  
AGGAACCGGAACCCGCGGUUAUAAAGUAAAGGAACCCGAGA  
>P984  
GAGGGGAUGUGGGGCCCAAACUCAUAAUUCACUGAAGAC  
>P985  
AGCGGUGGACCCAGGCGGCCAUGUCCCGCCCUCGCAUGCGC  
>P986  
UCCGAGGCAGUAAUAACUGAACAAAGCAGCCUGUCCCUAG  
>P987  
GAUUCUUUUUCUAGGGAUGUAUACACAUAUUUACAAAUAA  
>P988  
AGUGAGGGGAGAGGGAAGGUACCCGAGUCUGUUUCUUGUUA  
>P989  
GAGUGCAUGCGUGGGGUGAGUGAGCGAGUCGGGGGCCCG  
>P990  
GGGUACAGCGCCCGAAUCGGAACAGUGUAGAACCAUUCUCUA  
>P991  
CCCAGAGCAGGGUUUCUGAGACUUCGCGUCAGGAUAUGUCA  
>P992  
CUACCUCUUGACAGCAAUGAUUUUUGGGUCCAUGAGGGUUG  
>P993  
AUGCUGUAAUACCGGCCCCACCCGAUUGACAUUAAGUUUA  
>P994  
CCACUUCUGCUAGCAUCUUGACAACUUUUUGCAGGGAAAAC  
>P995  
AGAAAGACUUUUUGCCCAAGACAGUGAAAGUAAUUAUAAAA  
>P996  
GUCGCGGAGAAAGGGCCGUAACCGGAGGACCCACGCCCCUG  
>P997  
UUUUUAAGGAGGCGCCAGGGAUUCGCGGCGUGCGCGGC  
>P998  
AUACAGUAGGUUCCUGUGAACCCUGUGUUGGUUCAAAAAG  
>P999  
AUUUCUAUGCUUCGCAUAUAUAGUUGCCACAGUUAAAAAA  
>P1000  
UGUUGCCAAGGAAUACUUAAGUGGUAGAGGGUGCUUGGCU  
>P1001  
AAGGUAGUCUUCCCAACUGACUGUAGGGUUGUGUCUUUUC  
>P1002

GAGCCAACAACAACGCAAGAACCUUUGGUGGGCAGCCAAAA  
>P1003  
AGCAUCAUCUCUGUAUAUGAAGGACGGAAAACCCGCUUUGG  
>P1004  
UCAUUUAUUAUUAUCAAAAACUGAGAGGGUAAGUAUUCAG  
>P1005  
AAAUCACCACUUUCUAAGAGACUAUCCCCUCAGCCACAAAU  
>P1006  
AGAGAAAAGGAGGGGACGGGACAGACGAAGGCAACCAUUUU  
>P1007  
GCUGGAGUAUACACCCUUC AUGGAAAGGGAAGUCGGCAA  
>P1008  
CUAAGGAGAGAUUUAUUCUGACUGGUGGUCUUAUCCUGGU  
>P1009  
GUGAGUGGGUUAGAAAAUUAACAAGUAAGAUUGAUUGGGUU  
>P1010  
GAGCAGUCACCUAGGAGUAGACAAGGUGGAAUGGGAGGAGA  
>P1011  
AGGGUGAUGUGAGGGGAGGAACAACCAUGAACAGGUGGAAU  
>P1012  
UCCCUAUGUCCAAACAAAAACAAGCCCCCCCCUUUUU  
>P1013  
UGAGGGUUGCUACGCUACCGAUGGUGAAGCGACAUGAGAAA  
>P1014  
AUUUCUACAGAAUCCCUAACCCCGUAGAGUACAACACCA  
>P1015  
AGCCUGUCUCGUGCGUCUUGACUUUCCCAACAUCUAGAGGA  
>P1016  
ACCACCUCUCAUAAGGAGAGACAACUAGCACACUAGUCAUA  
>P1017  
AAAGCAAGGGCUUCCAAUUCAGAUGGUGAACUAUGCAUGU  
>P1018  
UCCCGGGUGUUAAUGGAGAACCCGGCGCACACGAUGCCAA  
>P1019  
GCAGAGGUGUGCUUUUCAAGACUCACCAAUACUGUGUUUU  
>P1020  
AUCAUCUGCAACA AUUUUUGACUCAGUUUAUUUACUUUUGC  
>P1021  
AAGGAGAAGGACUACCCGGGACUGCGGCCGCCGUCAGGU  
>P1022  
CGUGUGCCUGAGUGGGCUCUACUGCCUUGUCCAUUAUUAU  
>P1023  
UGCCAGGCAAUGGGGGAGGGACAAGUAAAUAUUAUUAU  
>P1024  
AGAGGUUUUUGACUCCCGGACAGUACAGAUUUAGGGACCC  
>P1025  
UUAGGAGUCCUAGGGAAGCAAAGCAGCUAACUGCGAGCAC  
>P1026



CUAUAAGAAAAUGUGUGGUA AUGUAGAACCAAUAUUCAAA  
>P1027  
UGGCUAGCAGCAAUGGUGGACACCUCGAUGUGGUUCAGUU  
>P1028  
AAAUUGUAACAGGAGAUGAAACAUGGCUUUACCAGCGCAAU  
>P1029  
CUACUAUAGCUUAUUUCAAACAAGGGGUAAAAAAGGAAA  
>P1030  
UAAUUUACCUACUCCCAUGGAGCUUGAGCUGGGUUUAGAUU  
>P1031  
AAAGGUAUGCAAUUAUAUUA AAAGUCCCUGUUUUGUACACA  
>P1032  
UGACAAGCCCCACCCCGGACUUUACUAAUGAGCUUGUUA  
>P1033  
UUGUUUUGGAUUGGCCGUAACUUUUAGAAAAAAUCUUGU  
>P1034  
AUAUUUUCUUGUCAUGAUU AUGCAGUUUUAUCUGGUAAGU  
>P1035  
GUUCUUUAAAAACCCUCUUC AACGGCCAAGGAAUCUAGG  
>P1036  
UGUGCACAUGCAGCGUUGUU AUUGUUCUGUUGUUAUCAUUU  
>P1037  
ACUUUUGGAGUAGGGUUCUA AUGAUGGAACAGUGAAGGUCA  
>P1038  
CUAGGCCAUGCAGGGGAGA ACUUUAAAUAAAAGAGAGUU  
>P1039  
AUAUAAAUAAAAUGUUAAA AUAGUAGUCAGCGUAGGAUA  
>P1040  
AAUUUGGUUUUUUAUUUAAA AACGAUUUUUCACUGACCCC  
>P1041  
UGGUUAAAUAACGAUGCUU ACUGGAGAAUCCGUUCUUUUC  
>P1042  
CUUAGGGGUGUGGAUCGGC AUAAGCAGUUCUGGCGCUACU  
>P1043  
AAUUAGAAUCUGGCCCUCAA ACCCCACAACAGGACUUAUUA  
>P1044  
GAACAGGACAAAGCCUAGA AUUUACAAACGGCCGGUAUUA  
>P1045  
AGGAAAAAGAGCCCGAGGAG ACCAUGCCUGACAAGAAUGAG  
>P1046  
AACCUGUAAAGAAACAAAAG ACAGGUGAGACUUCGAGAGCC  
>P1047  
CAUAUAUACUUUCAAGAUAA ACUUAGGAAAGGGAAGAAACU  
>P1048  
CUAUAUAGUAGUUGUAGAAA ACCUAGACAAACCAUCCAGUU  
>P1049  
CUAGUUUUCGUGGUUUUAUUG ACAGGGUUGGGGUUUUUUUU  
>P1050

UGAAGAAAGGUGGAUCACUC AUGCCAUUUGUAACACCGCCG  
>P1051  
GUAAAUAUAUAGGCAUAA ACCGAGGGAAAAGUGACCGGG  
>P1052  
UAAGCCUUCAAUUACAGAA AGCGCCGAUUAGCAUUGGUCU  
>P1053  
GACCUGGUAGAAUCUCUCUA ACCAUUUGAAGUUGAUUUCUC  
>P1054  
CAGGCCACCCCAACAACAA CAAAUUACAUAGCCCCAAU  
>P1055  
UUUAAUCUGUCCUGCAAUUA AGUCAGCCUCCACACAAUGG  
>P1056  
CGUAACAUUUACUAGGUAGA ACAGGGGAGAUAGUACAGAUU  
>P1057  
AAUAUUUACUCCUUGUCUCC ACCCAUAACCGUAGCAGGUGU  
>P1058  
UUACGGCCAACCCAUUUUUA CAAAGGCACCAAGAACAUC  
>P1059  
UAAUCUUUUGAGAAGAGAUG ACCCUCGGUUGCUGUGAAAAG  
>P1060  
GAUACCUAAAACAGGGUUUU ACUGUAAGCUGUGUUCACUCU  
>P1061  
UCCGUCAAGUACACAAAGUA ACUUUGCGGGAUUUUAGGGU  
>P1062  
AGCAAUCCUAAUGUGGUGA ACAGCACACACACUUACCAAC  
>P1063  
AGGUGUGAAGCGUGUGCUUU AGUUUCGUGGGAGGCCUGGCA  
>P1064  
ACUCAUCUUGACUUUCCCA AGUUAAGAGAAAAACGGGUGA  
>P1065  
GAGGGGCCUUGGGGCUUAG ACUCAUUUUGAAAUGUCCUUU  
>P1066  
CGAAAGGUCCCCGGUUCGAA ACCGGGCGGAAACAGAAUCUU  
>P1067  
AUGGAAGACCGUUACCCCGG ACAUGACUGCCCCAAAAGGGG  
>P1068  
GGCGAAUCUGGCUUUGGGGG AGAGGAAGAAAAGUCGGAUU  
>P1069  
AAAAAAUGAUGGUGCCUCU AUAGGGCCAAGACAGAGGAAA  
>P1070  
ACUACCGUCGCUUGUUUUUC AGAUUUUUGCGGCUAUUUUCG  
>P1071  
UGACAAAGGGGAAAAAUAAA ACCCCACAGAAAGAAGCAGGG  
>P1072  
AUUUCCACCAGAGUGUGGA ACCCGUGGUCAUGAUGCACAU  
>P1073  
UCUUUGCAUUUAAUGUUGAU ACUGUAAGGGUGUUUCGUUCC  
>P1074

AGAUGAAAACAACUAAAAGACCCUGGGGGCUCGAGUUCG  
>P1075  
CGUCGUGGGCUGUGCGGUCAUUUCGGGCGUCACGUAACG  
>P1076  
AGUGUUUCCUUUAUUUUUUAUAGCGUAUAAAAGUUUCUGA  
>P1077  
UGGCGUCCACAGCGGGCUGAACCAACUAUGGGAAUGCAG  
>P1078  
CCAAUACUUUCCACGUUGGACUUUCCCCUUAUUGGGUCU  
>P1079  
GAGGAACUUUAUUUUUAAAAACUACCUUUUGGCCGGGCACA  
>P1080  
AUUCUGAGCCCCGGGGUAGACAGUCCUCAGUGAGGGGUUU  
>P1081  
UUGCGUUUCCGUGGGCGGGAGAGCGCCGGUCCGUACCCACG  
>P1082  
UUUUUUGGGACCUUGGGGAAGGGAGGCCAGAAACCUCCG  
>P1083  
AUUUUUUGAGUCACAAAAAAAUCCCCUCGAGUGUUAGCU  
>P1084  
UCAGAGAACUUUAUCUGGGGACCGCCUCGAAAAGAACAGUC  
>P1085  
UGUUACAUUUGUUAAAAUAACUUUGGGCAUUUGGUUAGGA  
>P1086  
UAUCUGAGCCUACAUAUAACUUGUGUGAUUUCAAUUAA  
>P1087  
GGAAGACACGUUUGGCCAGACCCAACUAUGAUUAGAGCCA  
>P1088  
AGCAUGCAAGUUCUGCUUCCAAAACCUCUUUGAGCCCG  
>P1089  
CUUCAGCCGCCAUCAUUAUUUCUACCGCGACCUCAUCAGC  
>P1090  
GACAGCACUGCAGGUGUUUGACCCACUGGCAAAAACAUGAC  
>P1091  
ACAGAGGACUGACCGGUUCCAUUUUUUUUUUCCAGACAA  
>P1092  
GGGUGGGCGACACCUCCUCAUCAUGGGAGUCCGACUGUGA  
>P1093  
GAAAGGAGAAUGUUUUGUGGACCACUUUGGUUUUCUUUUUU  
>P1094  
CUCGGCUGCACUUGGGCAAGAGAUAGCUGGAGCUAUCGCCG  
>P1095  
ACAGGCCUUAGAGAGAGUAGACCAGUAACCAGAAAUAACCA  
>P1096  
GACGGACAUCACAGGAAGGGAAAUAGGGAAGCUGGGUUUGG  
>P1097  
CAUCAGCAAGCUCCAGUGCUACGUGUCCUGGCAUUUUAGG  
>P1098

UAAAGAAAAAAUAGGGAGGACCCAAAUAGACGCAAUAGA  
>P1099  
AGCAGCUUUUUAAAAUUGUAGUGUAGUAUGUGUCCUUAUG  
>P1100  
AGGUGGGCUGUGACCACCGGACCUUUUCAUAAGUGGUGGCA  
>P1101  
UUUUCAAAGGAGAUCUAUGGACCAAUAUUGGAGCGAAUAA  
>P1102  
UACAUACUGCCUUGUUCAAACCCUCAUCAUCUCCUGCAU  
>P1103  
UGGCCGGAACCUCAGAAAUCUCGCAGACCAGUCGUUUC  
>P1104  
GGUUAGUACUUGGAUGGGAGACCGCCUGGAAUACCUGGUG  
>P1105  
AAUUAUGCCUGUGGAGAGUAACUCACCCGUAGGGCCCAAAG  
>P1106  
AAAACGAGAUUGGGGAAGGGACUUGGAGUACUAAGUUUUGA  
>P1107  
GGCACCCGAGGCAUUAUUGACCGGAUCUACACCCACCAGA  
>P1108  
UGGUUUAAAAUUUCAGUGAGAAAAAGUAACCACAGGGGUA  
>P1109  
ACCCGGGGCUUAGUGAGGUGACAGAUGUGAUGUUGGCCAAU  
>P1110  
GUAACCAGGAAUAAAUAUAAACCCCCCCCCCUUUUUUUU  
>P1111  
AUCGGAUCCUCCAGCCCUAUACGGAAGGGCACAACCCUU  
>P1112  
UUUAAUUUGGUAGGAUUUUGACUGGUUUUGCAACAACAGGU  
>P1113  
UGAGACUAAAAGGAAUGUGACAGGGAGAAAGGAAUUUUGA  
>P1114  
AAAUUAGAGCCUAUAUAGUUUUUCCCUAGGUGAAACUGCA  
>P1115  
UAUUGUAAGAUAGAGUUGAGACCUGAUAGGUGCUCUCCCC  
>P1116  
GGACGUGGUGGGGACCUUAAACUUAGGGGAAGGAACCGUAG  
>P1117  
GGUCUUUCGGGGCUCCGUAACUUUCUAUCCGUCCGCGUCA  
>P1118  
AAAUUUACGUGAUGAGCUCUACAAGGCCAAAAUUUUUUUU  
>P1119  
UAGACGACAUCCCUAUUCGUACCUGGUUCCCCAAGGAAAAU  
>P1120  
CCAUCGCUCUUCUACUAUGAACCCCCUCCCCAUACCCAAC  
>P1121  
ACCAAUAACUAAUAGCCC AUGGUUCCGACCAUAAAGUAC  
>P1122

AAAGAAAGUUCAAUUUUGGGAGUUAAAAGUGUAAUAAGGUA  
 >P1123  
 GAAUAAAACAAACGCCAAAAACAAAAAAGCCAAGAAACAA  
 >P1124  
 CGGCCUGUCUCCACAGCUGUAUGUAAGAAAGGGCAGUCGGG  
 >P1125  
 GGGUGGUCGCUCUGCAGAGAACCCCCUUCAGGAUCCGUGA  
 >P1126  
 AAGUCUGGGGGAAGAUUCAGACUUUAUUUUUGUGUUGACAG  
 >P1127  
 ACGCCGCCUUAAGAGCUGUAACACUCACCGCGAAAGUCUGC  
 >P1128  
 UUAUGUAAUUUAGAGGUAUACGCGCAGUUAGCCACUCCUU  
 >P1129  
 UCUUUGUGAAAAGACUGGCAUCCCCAUGAUAGGAAUCCC  
 >P1130  
 UCUGGAAAUGCAGAUAAAGCAACACGGGAAAUCUCAUU

## II. Negative subset $\mathbb{S}_{\xi=20}^-(m^6A)$

>N1  
 CUGUGACCUUACAGCUGAGAACUGUAACACAAGAGUGGAGC  
 >N2  
 CACGUCCAUCUGAUGGCAGAACUGCUGGAAUUUUUGAGAUG  
 >N3  
 GCACUUUGGCAGCACAGAGACUAGUGUGACAUUGUAGUGG  
 >N4  
 GAAUGAAGACCUGCACAGAGACUGCCACAGUGUCACUCACA  
 >N5  
 UAUUAAUAAAAGUCUUAAAAACUUGAUGAGAUGUCUAUUUC  
 >N6  
 UGGCAAACACCUCAAGAUGGACUUGAUGUCUCUCCCCCUUG  
 >N7  
 UCAUUCUCCUGGCCUGUAGACUUCACUCCUGUCUCUUACC  
 >N8  
 AAUAUCAUUUUGUAGAUAAAGACUCUUACGCAUGCCUGAAAG  
 >N9  
 UCCAGAAAACCUUUCAGGAACUAAAAUGAUUUGUUUUAGU  
 >N10  
 CUUCGGUUUCUUUCCCCGAGACUUGAAUUUCUUCUCAUACA  
 >N11  
 AUAUCUCUCAUCAAAUGGACUCAGUUCCCCAGUAAAUG  
 >N12  
 UGGAGCUGGGUCUUUGAGAAACUCAAUAAGAUACAUGAACC  
 >N13  
 CUAACAGGGAAACAAUGAAACUAACAGAAGUUAUGAAACA  
 >N14  
 GUCCUUAUCACUUUCCAGGACUGCUUAAUUAUUAUCUGA

>N15  
AUAAAACCAGAGACACUGAAACUUAUAGAGGAGAAAGUUGG  
>N16  
UUCAAACUUUUCUUUGCGAGACUUAACCAGAGAACAAAGUC  
>N17  
GAGAGGGAGGCAGAAAACAGACUAAAAGAUGGAUAAGCAGG  
>N18  
CAUCCGUGAAGGAAGUCAGGACUGGAACUCAAGCAGGUCAG  
>N19  
CUAAUGGAUCCAUUGAACAAACUACAGUUUCUAUCUUGUGA  
>N20  
CAACUUUGGUGGGCUUUGAAACUCUCCUCCCAGCUGCCAGU  
>N21  
AUGUAAGAACUGGCAGGGAAACUUUGUAUCGUGAAAGUGAU  
>N22  
ACAUUAUGAACUAACUAUGAACUCCCUUCCCGGAGUUCAUG  
>N23  
GAAUGGCUAGCAUUUUCAAACUAACCUGAUGGAUACAAAU  
>N24  
CUUUUUGAGCACAUGCAAAAACUUGAACCAAGCAUUCUGGA  
>N25  
UUUUUAUAGGAGUUAUGGGACUCUUUAGGUCAUUUUUCA  
>N26  
GCCAUACAAAGCAAAAACAGACUUAUCUGGACAUAUUCAUC  
>N27  
GUCCCAUGUGGGUGGAAAAAACUACCCAUCUGGUUCCCAGU  
>N28  
UUUAAUAUUGAUUUUAGGAAACUAUUUUUGGAGAUAGGAAG  
>N29  
GGUAACCCAAUAACAUAGGAACUUAUACAAUAUGAACUCAC  
>N30  
UCUGCCUCCUAGUGAUGGGACUAAAGGUGUGCACCACCAU  
>N31  
CUGCCUAGGGAAGUUUUGGGACUUCACCUCCUUGCCUCCU  
>N32  
CAAUAUACUCUGGGAAAGGGACUGAUCACUCACUGCAUCUU  
>N33  
AUUAUUCUUUUUAUUGGGGAACUGAGUCCAUAUGAUUGAG  
>N34  
ACAUUUGCAAACUGUGCUAGACUAUAAUUUGGCUCAUUCAA  
>N35  
AUUAUUUAUCCAGAAACUAGACUAAUAAAGAGUAAGAGUUA  
>N36  
UGUCAUUCUAGAGCCUGAGACUUUGGUGUUCGGUUCAGGA  
>N37  
UCAAUGCAAUACCCAUCAAAACUCCAACUCAAUUCUCAA  
>N38  
UCAUACAAGAAGCCUACAGAACUCCAAAUAAGACUGGACCAG

>N39  
AUAGAUAAACCCUUAGCUAGACUCACUAAAGGGCACAGGGA  
>N40  
CUUUAGUUGGGAGGGUUCGAAACUCUUGGGUGAGGAGUUCAG  
>N41  
CGAAACUGCGAUCGCACCAAACUUAGAAACAGAACACAGAC  
>N42  
CUAAAGGUUCUUAUUAUGAAACUGUUAUGUAGGGUUGGUUC  
>N43  
UUGAGUUAUUUUUAUAUCAAAACUACUUCACUGAGACUGUUU  
>N44  
UAGACAGUGACAUCUUGGGGACUCUUAUGGAAGAAUAAGAA  
>N45  
UCAUGCAGUCAGAAAUCAGACUUCAGGCCUUCAGAGCCA  
>N46  
CAAUACUAGUUGGUAAAAGGAACUAUAGACUGUCAAAAACAG  
>N47  
GUUAUCCAGGGAGUGACUGAACUGCCCUCAGUCUCCUCGA  
>N48  
GGAGGAGUGGGGAUGGCAAAACUGUCCCCCCCCCUUGG  
>N49  
UUGUUGAAAAUUGCAGAGAGACUGCACUCCGUAAUUCUGAA  
>N50  
AGAUGCCCAGUGUAGGGGAACUGAGAGUGGGGAGGUAGAA  
>N51  
GAUUUAGAGGCGGGAAGAGAACUGGAAAAGGAUUAACAUU  
>N52  
GAGGUAAGACCUUUGGGAGGACUUGUGAUGUUUGAAAAGAG  
>N53  
CUAAGUGCCUCGAAAAGAAACUAGAGAGAGCAAACACUAG  
>N54  
AAGUGGAUUAUAGCCAGAAACUUAGAAUACCCAAGAUUA  
>N55  
GUUCUUUUUUGGUUGGGAGACUAUUAUUGACUGCUUCUAU  
>N56  
GGUGUGUUGGGGUGCCUGGACUGGGUGAAGUGGGAGUGAU  
>N57  
GGCGAGACGCCAGUAAGAAAACUGCUGCUUCUAAUGCUCAG  
>N58  
CAUUAUGCAGAAUUUGGAAAACUAAAAUAUAUCAUGUUUG  
>N59  
AUUUUCUGAGGAACCGCUAGACUGAUUUCAGAGUGGUUGU  
>N60  
CCCUGCGCUCUCCUGUGCAAACUGGUCUCUUUGGGACCUGG  
>N61  
AAUAAAAUUUAGUACAAAAACUAAACAACAUAUUUAAAAA  
>N62  
UGUAGUACUAAUCAAAAGGAACUAAAGAAUUAAGGAUGUGA

>N63  
UGUGGUUGCUGUGAAUAGGGACUUACUUCUUGAAAAUAGGC  
>N64  
ACACAUGGUUUUUUUUGGAAACUGAACUGACACCUUGUUGG  
>N65  
AAUUUGAAAAGAGUUUGUGAACUUAGUAAGACUUUAAAAUG  
>N66  
UAGUUGGAACAAUAAUAUGAACUAAUAAGUACCCCCAGAGC  
>N67  
CAGAGUCUAUAACCUACUAGACUGAUACGUAAGUUAGGCAU  
>N68  
CAGGAAAAAGUCCAUGAAAACUGAAAUCACCCUUACAGUA  
>N69  
UGAAGUCACAACAUAUCCAAACUUAUGAGACACAAUGUAAG  
>N70  
GGUUCCUAGAUCUCCAAGACUAGUCUGCACAGGUGAGAG  
>N71  
AGCAUUUUCAGAAGCUAGGGACUCAAGAGGAUGGCAUUUCC  
>N72  
GGUACCUAAAGGGCUGGAGGACUUUUCACUAAACUCUCCU  
>N73  
AUUUCAGGCUCCAAGGAGGGACUUUAUGGCUUACUAAGAUC  
>N74  
ACCCCUUCAGCAAUUGGGAACUUUCUCUAAUCCUCCAUI  
>N75  
GUUUGGAGCAGAGACUGAAAACUGCCCCACCUGGGAAUCCA  
>N76  
UGAAGGUUACUUUCUUGUAGACUUUAUCUUAAGCAGUAAA  
>N77  
GUCCCCAGGUUGGCUUGGAGACUUUGUAGCCUGAGGAGCAC  
>N78  
AGCUUUUAAUGUGGACAUGAACUACAUAUUUGACAGUGCU  
>N79  
UACACCCAGAGCUCCUUGGAACUAUACCACCAAUCAAAC  
>N80  
CUCAAUGGACAGCAGCCAAGACUAGCGCUUCUACCACCCU  
>N81  
AGAGAUCUGGGAGGUAAGAGACUCUCAGGACUCAGGGGAAG  
>N82  
CCAAGGAAAAGGAGGUCAAACUUGGGAUCUAGCUCAAGGG  
>N83  
UAUCUUUUAAAGAUAAAGAUAGACUAUAUUUUUCAUGUGUUUA  
>N84  
AAUCAUUUUCUCCUUUUUAAACUUUUCACUUUUUAAAAAU  
>N85  
CUAAGAACCCUGGUGUUGAACUUAACCAUAGAUUAACAUI  
>N86  
GUUGUCCCUGCAUGGCGGAGACUAAGAUUUUUUAUCUCCUCA



>N87  
CUGGAUGGUAGUCCUUUAGACUCUACUCCGAACUUUGUCU  
>N88  
GAAUCUUCUGGUCUCGUGGGACUGUCUGCCGAGUUCUUUCC  
>N89  
CACCAUGCCUAAGUAGUUGGACUGAAAUCAGAUAAAAUAAA  
>N90  
AAAAAAACAAAGAAAGAAGGACUGUUUGAUGGCUAGUAGUU  
>N91  
UUGUUCUCUAUCCUGAGAAAACUCUACUUAUCACCUGCCUC  
>N92  
UCUGUUUCAGUCUCUGUAGAACUAUCUCAGAAAACUGAUGU  
>N93  
UUAACUCUUGAGGUCAAGGACUUGUUUCUUUUUCUUCUGU  
>N94  
GCCUGACUGAGGAAGAGGAACUCUUAUUAAAAUUUGAUAU  
>N95  
UUUAUUUAUUAUUUUUGUAAACUCGGUGUGUAAAUCACUCU  
>N96  
AUGGGGGCCGAAUUCAUUGGACUCCCAGUAGAAGCUCUGGG  
>N97  
CUGAUUUGACAGUUGGUUAGACUGUGGAGACUCCAAGGGG  
>N98  
AGGCCAAGGAGUUCUAUUAAACUUCAUCAAGAAUUGGUCAG  
>N99  
UACAUAAUACCCCCACCAAAACUCAAGGCUUCUAAAAUAAA  
>N100  
CUAGAGAAAGUACCCAUGGACUGAAGGGGUCUUUAACCCU  
>N101  
UUGUGCAAUAAGAGUGCAGACUACAGAAGCUACACAGCUU  
>N102  
GGUAGAGGACAUCAAGAAGGACUUAUUAAACUCACUUAAG  
>N103  
ACAGAGCAAUUGUGAUAAAAACUGCAUGGUACUGGUUAUAGA  
>N104  
AGAAUCUAACAGAAAACAAGACUGGCUCACCAUCAUCAGAAC  
>N105  
AGAGUACUCUGACCACUGAAACUAAGGAUAGAGCUAGUCUC  
>N106  
CAAUAGUGAUGUUUUUAGGACUUCUUCUUUAUAAUAGU  
>N107  
ACACCCUGCACACCACCAGGACUCCUUAUUCUCUGGGGCCU  
>N108  
AGACUUAGGUCACCAUGAGAACUCAGAAAGCUCUCACAAAU  
>N109  
AGCUGCCUACGGCAUGUGAACUGGGUUCUCCUGAAAGGUG  
>N110  
AAUCCAUAACUCCAGGGUGGACUACUAAGCCUGCAAGGUG

>N111  
UUAAAACAU AUGUGUUUGAGACUAGCAAAAAAUGGGUAAAG  
>N112  
CCCCCCC UUUAUAAGCGCAGACUUUUUAUUAUACGUUUUAGC  
>N113  
UUUCCAUGUAUACAGCUUGGACUUUUCUGAACACCUUUCUA  
>N114  
GUGUGUGUGGAUAAAAUCAAAACUCGAGUUGUAUACA UAAA  
>N115  
AAUAAAGAAAGAAAUAAAAGACUUUUUAGAGUUAAAUGAAA  
>N116  
GGGACAAAAGUAAAAGCAGAGACUAAAAGAAAAGGCCACCCAG  
>N117  
CAUACACAUAGAGUAGAGGACUUC CAGGUCUGUGUUCAU  
>N118  
ACGCUGACACCAUUGCAUAAAACUAGCAAGAUUUUGCUAAAA  
>N119  
CCUAAAAAUUCCACCAGAGAACUCCUAAACCCA UAGCUUC  
>N120  
CUACUUGUCAUAGCAUGCAAACUCUAUUAUCUUGAUUUUUU  
>N121  
GAACUUUUAAUAUGCCAGGAACUGCCUCUCUUAUCACAUAA  
>N122  
GGUAAAAUCCUCCAAGAGGAACUCUCAAUUCUGAAUAUCUA  
>N123  
GGGUGGGUGGAUAUGGGGGACUUUUGGUUAUAGCAUUGGAA  
>N124  
AAGAAAAUGCUUCAUUCAAACUUCUGUUAGGAGUUGGUUG  
>N125  
AGCCAUGGACUGUACCAAGGACUCUUGCCUGAGUGAGAACC  
>N126  
GUAAUCCAUAUAUAAAACAAACUCAAGACAAAAACCACAU  
>N127  
GCUCAUGGGGGCUCACAAAGACUGAACUUGCAUGGGACUGA  
>N128  
UGUUAUGAAAGAUGUUAUAAAACUGCAUAUUCUCUAAACAU  
>N129  
GGUGUCUAGCGCCCCAGAGGACUCUCCAUGCCGCAGGACCC  
>N130  
UGGGCUGGAGUUGUUCUUGAACUGGAGGAUGCCGGGGAGAG  
>N131  
GCUCUUGUGUUUAUUGUAAGACUGGACAACCUCAUCCCAGG  
>N132  
CAUGUAUAGGGGUGACUAAAACUAGGCUCCACAUAAAGUAGG  
>N133  
ACAAAAAAAACUAAAACAAACUUGAUAGGCCCAUAAUAUG  
>N134  
UGGAAAGAGAGGCCCAUUGGACUUGCAAACUGUAUAUGCCC

>N135  
AUAGACCAGACUGGCCUCAAAACUCAGAAAUUCCCCUUGCCU  
>N136  
AAUAAUGGACCCUCAGUGAAACUUUUAGAUAUCCUGUUGUU  
>N137  
UACAUUCAGAUUCCACACAAACUCUCCUGCAUGUGUGUCUG  
>N138  
UUUGGCUAAUGGUUAAACUAGACUUCAAAUUCAGAACCAGUG  
>N139  
AGGCUGACCUACGAGAUAAAGACUUAGACCAUUGGGUGACUU  
>N140  
GUCUUCUCAAGGAUAAAAGAACUUCUGGCGGAAUCACCAUG  
>N141  
CACGUGUUCUUGUGAUGAAGACUGAAUGUAGGCUGACAAGG  
>N142  
UCCACCUACAGAGUUGCAGACUCAUUCAGCUCUUCGAACU  
>N143  
CAGGUUUGCAGAAAUGAAGAACUACUCUGGAAAUUUAAAU  
>N144  
UUUCUCUACACAAAGGAUAAAACUGACUGAGAAUGAAAUUA  
>N145  
CAUCCACAUUCAUAAAAGAAACUUUACUAAAGCUCAAAGCA  
>N146  
UCCCUUCCGCUCGACUCGAGACUCGAGCCCCGGGCUACCUU  
>N147  
CCAAUCGCGCAGAACUUGAGACUGCAGUACAUAGGGAAGCA  
>N148  
AUAUUGCCUCACCCUGAGGGACUGGAAUAAUUAUACUCGGG  
>N149  
GGAGCCAUCUUGGAUCUGGGACUCAGUGGAAAGUUGUCUGC  
>N150  
ACUUUCCUUAAGCUCUAAAAACUUCUACAUCCAUUUAUACA  
>N151  
AUGAAGAGAGUCUAUCAGAAACUAUUGGUGAAGCUUUGUUG  
>N152  
CACUGUGAAAAUUAACAAACUUAAGCAGUUCACUGAAUU  
>N153  
UGAUUAUCCCUAGGCAGUGAACUUUGGGUAUGACAGAAUUA  
>N154  
AUGUAGCUGUCUCUUGUGAGACUAUGCCGGGGCCUAGCAA  
>N155  
GUCUGGUGGUUCCUCAGAAAACUGGAUUAAGUACUACCGGA  
>N156  
UCCUCAGUUUCAUGUGUUGGACUUCAUCAGAGUUCAGGGCA  
>N157  
CAUCUAGCUCACUCUUUGAGACUUCUUAAGAGUUAUCACUA  
>N158  
AGAGAAAAAAAUUAAAUGAACUGGCAAACAAAACUGUACU

>N159  
AGAAAAAGUGAAACACAAAGACUCUGCUUUUCUUAGCAGCA  
>N160  
UUAUAGGACUGCUCUUAGAACUGUUGUUAGAACUUACAC  
>N161  
ACAACGCGGGGAUGGAUGGAACUUCAUGGGAAGAUAAAGUA  
>N162  
UGGAUUGUAUAUAUGCUUAAACUUAACCUUUGGCCUAGAA  
>N163  
CCUAUCCCCUCCUCCCUCAAACUACUCACUAAACCACACAC  
>N164  
AAUUGGCGAACCAACGCGGGACUGAAAAACGGCAAAGGAUU  
>N165  
CUGACUGCUGAAAGUUCUGAACUCGGUGGGGGAGUCGGUUC  
>N166  
ACAAUAGUGGACACCCAAGAACUCAUGAUAGACCAAGCUUG  
>N167  
AAAAGGCUAUACUCAACAAAACUGGAAAACCUGGACGAAAU  
>N168  
GGAAGAGGGGCCUUUAUGAACUACAUCAUGAUGAUUCCC  
>N169  
AGAGGAAAAGGUCAAGAAAGACUUAUGGCCAGAGAUGAGAG  
>N170  
GUAUACAGGCAACACCCAAACUACAGCACUACUAUUUCAU  
>N171  
UCCAAUUUUGUGGAGUACAGACUUUUGAAAGAUGACCUAGU  
>N172  
AUUUUGACCAAGGAGCUAAAACUAUCCAGAAGAAAAAAGA  
>N173  
GAAAAAUAAUUGGUUAAAACUUUAUCUGCUGGCUGUCCA  
>N174  
AUGCACCUAAUCUUAAGAGACUGAAGGCCCAUAUAGUUU  
>N175  
GAUAUCUAAUUAUUGGAGAACUGUACCCACAUCUAGUAUA  
>N176  
UAAAGAAGUCAAGAUGGUAGACUCCAAAAAUCAAAUAACC  
>N177  
UUUCUAGCGGCACCUGGUGAACUACAGAAGAGUUACUCUUC  
>N178  
CCACUUUGGAAAGCCCAGGACUCUCAGUGCAGUGGUUCUC  
>N179  
ACAGUCCCCUAGUAAUGAACUUUCGCAGUCAUCACUCUU  
>N180  
ACAAAGCAAAGCAGGCAGGGACUGCACCAAUCCCAGACUGC  
>N181  
AAGGAAAACAUUAAUUGGGACUGGCUUACAGUUUCAGAGG  
>N182  
AGGUGGUCCUUGGUAGUCAGACUCAGGAGGAGGAAGUGGCC

>N183  
AUAUCAGGAACAAGGAAAGAACUUCCCACCCCACCCCACU  
>N184  
GGUCCCAAGUUUAAGCCUGAACUGAAACGAAGGUGAUGGUG  
>N185  
UGCAACAAGGUACCUGACAAACUCAACUCAAGGAAGGAAGU  
>N186  
GCCACCAAGUAAACAGUUGGACUGUUUUUGAAGUUAAUUGU  
>N187  
ACUUACAUAUUUUCAAAGACUGCUGGGUGUCUAACAAAC  
>N188  
GAGUUAGCGGUUCUCAGCAAACUCAUAGCCAGUCACCAAUA  
>N189  
CACAAACCAGGAGCGGCAGGACUCGGAGAGGCCUGGGGAAG  
>N190  
ACCUAUUUCUCA AUGUUUGGACUCCUGGCCACCAGGCCCC  
>N191  
ACGCUACGGAGUAUGCAUGGACUGUGUAGAUAGUCACAGC  
>N192  
UUGCAGGGGUGCUAGUUUAGACUCACUGGGUAAGGGAACCA  
>N193  
AGGGGAGUUUGGAUGGAGAAACUAGGGGGUGGUGCCAUCCC  
>N194  
CGAAAUCUAAAACAAAACAGACUUUUUAUGGGGAGGGGGA  
>N195  
GUCAUGGGUCCCUCCAUUGGACUCUUUGGUUGGUGGUCCAG  
>N196  
ACUCACUAGCAAACUGAGGGACUGUAGGUAGGGCCAGUACA  
>N197  
AGAGUCAUGGAGCCCAGAGGACUCGGAGACCAGAUUCUUUC  
>N198  
AUAUCACCAAGGCAUGGCAGACUGACCUGCAUGCCUCCUGU  
>N199  
GAGAGAGUAGCAGACAAAAGACUCCUGUGAAGUUGAACACU  
>N200  
AUGAGAAAUAAGCUCGUGAACUCUCUACCCCUAGGAAGCU  
>N201  
GACCUCAAGCUGUUCUAUAGACUAAUGGUGAUAAAACUGC  
>N202  
ACCAAUAACCCCAUUAAAAACUGGGGCUCAGAGCUAAACA  
>N203  
AGAGGCAGGGGAUGGGUAAACUACAGAAACUGACUGCGGU  
>N204  
UUACCAGUGUCUGAUGGUGAACUCAACAUGUGGCCAGAUGG  
>N205  
GUCAAAGCUAAUGCAUUGAACUUCCCCCCAUUAUUCUUA  
>N206  
UGUUGUCCCACGUUCCAGAACUCCAGGGAAAAAGGCAGAG

>N207  
AUAGGAGUCAGGGGCAGGAGACUCACCACAGGCCUUUAGGCC  
>N208  
AGGAGUCAAGCUACUUGGGAACUUUGCAGUAUACAUGGUUA  
>N209  
GGGCUCUCCUUGUUAUUUAGACUUUUUUUGGGCAAUGUGGA  
>N210  
UUGGUCAGGGUGUCCAAGGGACUCCCAAUCAUUUUAAGCU  
>N211  
AACCUCAGCUUCUGAGAGGGACUCUCAGCUUUUUUUGUUUG  
>N212  
ACUUCUUCAUUGCUGGUGGAACUGCAAGCUGGCACAACCAC  
>N213  
AAGCAGGCUUAGUAUAUGGGACUGCCUCUAAGACAGGACUA  
>N214  
UGUAAUACACAAAAGUUAGAACUUAGGUUUAGCAAAGGCUA  
>N215  
GUCAUAAUUUUUUUCUAAAAACUGUAAACAUAGGAAUUUUU  
>N216  
AUGAAAGAUAUUGCAAGUAGACUUGGGGCAGAUGCAGAUGG  
>N217  
CAUGCAUAAGUGACCCCAAACUUCUUCAGAGAACUCUUA  
>N218  
UUCAUGGUUAUAUAAAAGAAACUGUAAGGUAGAAAUUUCA  
>N219  
CAGCCCCAGUUUAAGAAAAACUUCAAGUUGUGGAUUCUGA  
>N220  
UGGAGUCCAUAAGGGUUGGACUGCAUACAGCACCCAGCA  
>N221  
ACCCCCUCCAAAAAAGAGAACUUCAGACCAAUUUCUGUUA  
>N222  
AUUUGAGGCAAUCUACAAAAACUUUCCUUUAAUUGUAAUUA  
>N223  
CCCUGCACUGGGGAGAGGGAACUUGUAGUGCCCACGUCCAA  
>N224  
AAAGAGGCAAGGAUAAAGGAACUGAGUGACACAUUUGAAGG  
>N225  
GAAAAUAAAAAUCUGAGAAGACUAGGGAAAAUUGUUGUAC  
>N226  
UUUUGUAUUUUCGGACUCAACUUCUUAUAAUAAUUUAAA  
>N227  
UGAUAAUUUAAAGCUGUUGAACUGUGAGUUUCUGUAUGUGU  
>N228  
GAAGUAAUUUAUGAGAUAGAACUAGGGGAAAUACAUGCAUC  
>N229  
AUUUUCUGUAAUAAACCAGACUAUCAUCUACAUGAACAU  
>N230  
AUGUCAGUGGGAGGAGAGAAACUUGGACCUGAGGGUGUUUG

>N231  
UAACUAAGACAAGCCAAUGGACUUUCUCUACACAAAGGAUA  
>N232  
GGUCCGUGUGUGUUAAAUAGACUAGUCACCUUUUUAUAGAAC  
>N233  
CAAUAACAAUGAAGAGGAAACUUCAGAUUUUUAAGAGAGU  
>N234  
GUUUUCCCCACUUAUCUGAACUAAAAAAAAAAAAAAAAAAAA  
>N235  
UGCCUUUUGCCACCUGGUAAACUCUGGAGUCAGUCGUUAUA  
>N236  
UAUAUGAUAGUUUACUUAACUGAAGUGUCCGCACCCAAA  
>N237  
AUUGCUGGUUGGGAGGGCAAACUAGUACAGGUUCUUUGGAA  
>N238  
AUAAGAGAGGUUGCCAUGGAACUAGAAGAGAAGCCAGAACG  
>N239  
UUGUUUUUGUAGCUUACUGGACUUGAUUACUUUAAAAUAAC  
>N240  
CAACAAGAGUCAUAAAAUAGACUCCUGGACAGCCAAGGUGU  
>N241  
AGGAGUGAUUUCUACCAGGACUGUGGGGUUACUUUGGUUU  
>N242  
UGCGGUACAUAGGGAAGCAGACUACCCGGGCCUGACCUGGG  
>N243  
GGAGGGGAUAGGGAGUAGGAACUUUUCAGAGGGGAAACCAG  
>N244  
UUUAUAUUAAGCCCCAAAACUUGGAAACUUCUAUAGGAU  
>N245  
CUCCAUGCCUCUCACCAGAGACUAUGAAAGCCAGAGAUCCU  
>N246  
GCCCAGAGUUUACUAAGAGACUGUGCUUAUAAAGGGGGAA  
>N247  
GCACAAAACCCCUUAAUGAACUACAGGAAAACACAACCAA  
>N248  
UCACAAAGCUGUUUAGCUAAACUCACUGCUAUAGAAGUAUG  
>N249  
UGGGGGAGGGGUGCGAAGGAACUGUGGCCAGCCGCUAUUUC  
>N250  
CAAUGAGCCAACGUCAUUAACUGGAAUAAACAAAUCCA  
>N251  
UUUUUUUUUGACUUUCAAGACUGAGUUUCUCUGUGUAGCC  
>N252  
AUCCCAGCAACAGAAAGCAAACUAACCCAGGUAGUAUGGAA  
>N253  
AGGGCAAUGGCUGUAAAAAACUUCUGAGAGUUACCAACAA  
>N254  
GAAGAAAGUUGGGGAGUAGGACUAUAGUUUUAUUAUUUUUA

>N255  
GUAUAAUAUGUGGGGGUUGGACUCCCCUGAUAAAGGUCAGGC  
>N256  
UUUACUAGCCUGUAUUUUAAAACUAUACGAGCAUUUCCCAGC  
>N257  
UGCUCAUCAGUGGUUUCUGAACUAAAGCCGCCUUUAUCAAG  
>N258  
CAGGAAAUUCACCAGGCUGGACUGGUGAGCAGAAUAAGUAG  
>N259  
GCUGGUAACACAGGCAUCAAAACUCUGAGUCACCCCCAGG  
>N260  
AGGGUGAAAUUUUACAGGAACUGAAUUUUACAGCACCAU  
>N261  
CUCCUCCUAUGCUUAAGAAAACUCACCCCCUGUUGUGCUU  
>N262  
UUUUUGUUGGGUCAUAAAAAACUGAAAGUACUUUUUUUUUA  
>N263  
CUAAGCCUAGAUUCUAAAAACUAGGUUAGCAGUUUGGACG  
>N264  
AACUACCUAGUGAGGAUUAGACUUUCAAAAUGGAAGAUUUU  
>N265  
ACCCGCCAAGCGAUCUUAAGACUUCUGGUGAGUGGAACACA  
>N266  
AAUUGUUCUGUCUAAAAGAACUGCAGGGACAAUAAUGGAG  
>N267  
GAGAGCUGACCCAGCCCAGACUGGCUGCAAUACUCACUAG  
>N268  
CACCACAGAAGGGUUUUGAGACUAUUUGGAGAAAGUGAUAG  
>N269  
UCUCCGGUGCUUAAGACCAGACUGGUGUAAAGUGUAGAUGG  
>N270  
AAUGGGCAUAGAAAAAGGAAACUUUGCUUUCUGACUGCCCU  
>N271  
UGGGGAUUUAUUGUAAAAGACUCCUUAAGCAAAGUAUC  
>N272  
GGGAUUUUUGGAGAGAGGAAACUGAAACUAGGAAAGGGGAU  
>N273  
UUGCCUGGGAAUGUUAUGAAACUUUAGGAUGGAAAGGCUUG  
>N274  
GGUCUCCAUGUCUACAUUAGACUCCCUGGAGGUUUCAUCAG  
>N275  
AUAUCAGUAACUAUAGCUGAACUGAGUGCAUGCAAGAUGCA  
>N276  
CAAAAUCAAUGUGGGUAGGACUGUUAUUUUUUUCAAGGAA  
>N277  
AAAAACUUGCCUACAUAAGACUGGUUUCUGGUAAAAAGGA  
>N278  
GUGAUUAACAUUUUGGAGGGACUAUCCAUCUGUGUAGCUAG



>N279  
CGAGCGAGCAUGCCUCAAAAACUAAGUUUUAAAAUCGAAGG  
>N280  
AUACCCAACCUCACCUAUGAACUAUAUCAGCUUAAAGGUUU  
>N281  
GCUCCCCUCUGCAGUAUAGACUGUGCUUCCCCAGGGGCAG  
>N282  
GCAACUGGGCACGAGGUGGGACUCAAAACCCACGAUCUCGCA  
>N283  
GCUGAAAGGCUAGACGGUGAACUAGAUGUCCUUCUCAGGAU  
>N284  
GCAAUCUCUUCUUCUGGGACUCGGGAAGCUAGGUGGAUA  
>N285  
UACAAAUCAGGGGCCGGGAACUAGCUUAGUCAGCAGAAUC  
>N286  
UUAUGUUCAACCGUAUCCAAACUAUUUUUUAUUGUAGAAGC  
>N287  
GCUUGCCCCACCCUCCAGGACUAGAGGAAUGGGGUCUGCU  
>N288  
CGCCUUCGCGCCGAGGAAGAACUGAGGAAGAUCGCGGGUU  
>N289  
GACUCACAGCAGAAGGCUAAACUCUUAUGCGGCAAGCCCU  
>N290  
UAUCAGCUUGAAAGGGGAAGACUCCAAACUAGUGUGUACC  
>N291  
CACAGGCACAUGCAGCCAAAACUCCAAACAGGAAAAAGAAG  
>N292  
AAGCUACCGUCUGUGUUUGAACUUGUAUCUCUGAAGCCAUU  
>N293  
AGAUGCAUGAGCUUCACUAGACUAAAGAAAAACUGAUUUA  
>N294  
AUUAUUUAUUUAUUUAUUGAACUAAAAGAAAUGGUGAUUCA  
>N295  
AUUACUCAGGGUUCUUUAGAACUGUGAUUCCCAACCCUCCU  
>N296  
AGUGGUGAGGUCAAAGGGGACUCAGAGCUUCCCUUCUGCA  
>N297  
CUGUGGCAAACUCCCCCAAACUGAAAAUAAAUGAUCCCA  
>N298  
CACCUUUUAUGUUC CAGAACUGGUCAGAAUGGUGCCUCC  
>N299  
GUUCUUCAGGUGCAAUGUGAACUGGUUUUAAAGCAGGAUUG  
>N300  
CCUACUGUCUCUACUCUUAACUAGGUUUUAUAAUGGGAGUC  
>N301  
AGGAGUUUUGUUUGUAAUGAACUUUAUUUUUCCAGACUC  
>N302  
CCAUCUCUUUAAAAUCCAAACUCUUUUUACAAUAAAAGU

>N303  
GUUGGCCUGGGGAAACAUAACUUGUUUGAUUAUACAGACA  
>N304  
AUAUCUGGUGUUCGAACCAGACUCCUGGCAGAAGUUGUGUU  
>N305  
CUUGUUAUAUAAACACCUGGACUCAGGGCUGGGGGUGUAGU  
>N306  
AUGGGGCACAGGACAUGUGGACUCCUGUCCUCCUUGAGUU  
>N307  
GGACUCAAUUAGACUAACAGACUGGAUUCAAUUCGUAGACU  
>N308  
AAAGUUUUUCCUCCUGAAACUCAGCGAAGAGUUCAAGAA  
>N309  
UGUAAAUUGUGUAUUUAUGGACUAGGGCUCUGCUCCCACU  
>N310  
AUUUGAAGGGAAAAGAGAGAACUGUCCUUGCAAGGAGGACU  
>N311  
UUUCCUCUUGAAGGAAGAAACUGUUUUAGUGGAGCCCACA  
>N312  
AAGUUUCAAAACUAGAGUCGACUGGGGCAGGGGCGGGGGGA  
>N313  
CUGAGAGAGGGUGGAUUUGAACUAGGCAUUCUUGGAGUUUC  
>N314  
AAAACAAAAAACACCUAGACUGUGAACACGUGCCACUCG  
>N315  
UAUACCUUUGGAAUAUUAAGACUGGGUGUGGUUGCACACAC  
>N316  
CUGGGAAGAGAUUUUGACAGACUACCUCGCAGGAGAGUAAA  
>N317  
GCCCGCUGCCUCACUCUCAAACUGCCAUGAUUUUCCACAG  
>N318  
UUACAUGACCGUGAUGGUGGACUUCCCCAAAAUGGAAUUC  
>N319  
CAACAUCUCAAUUUUUAGAACUCAAGAAGCUGAGGCAGGA  
>N320  
UCAGAGCCCACCUACACAAGACUUAUCAACCGUCCUUGUGG  
>N321  
UUUGUUUGUUUGUUAAUGAACUGCUGCAGCCAUGUUGUGU  
>N322  
AUUAUCAUACAAAUCCCAAACUAAUUUUUUUUUCCUUUU  
>N323  
CAGUGAAACAAUGUUUGAGAACUGCCUUUGUGUGCCUGU  
>N324  
AAGACUGGAAGGUGCUCUGAACUAGAGAGGGAAGAAUAUG  
>N325  
UUUCUAUCCUAUUUUUAGGACUCUUAAAAAAAAACUAUUU  
>N326  
GCCAGCACUGUACCAACCAAACUACACCCCCAGCCUUUGUU

>N327  
UGCCCAAGAAUUGAUACCAAACUUUAGGGUGUACAUUUCCU  
>N328  
ACCCACCCCAAACGACGAAACUAGAAAUAAUUCUAGAA  
>N329  
CAUUCCUCAUCCAGAAAAAACUGAGAAUACACUCCUUAA  
>N330  
AUGGCUGGGUAUACCCUAGAACUCUGAAAAUAGUUGUGUGU  
>N331  
GGGAAAGCUUCUCCUUAUAGACUCUAAAGUGUGUAUGAGUG  
>N332  
AAGAGCAAGAAUGGGGUAGACUUAGGCCCCCGUAUAUCU  
>N333  
GGCUGCAUUGAUGGACAGGGACUUGGAGCUAAUAAAUCCC  
>N334  
AACCAAGAAAACAAAUAAAACUACAUCCCCCUUCACUCA  
>N335  
CAGUUCCACUGGGACCCAGACUGUGCUUCCCACCACACA  
>N336  
UUAGUUCUUGGACAGCUAAGACUAUUAUACAGAGAAACCU  
>N337  
GGAUGUAAAGUAAAUUAAAAACUAAAUCGGAUAGAAUAGA  
>N338  
CUCCGGUAGCGCGAAAUCAACUUGCCAGAGGCGGCUCGCA  
>N339  
UAAUUAUUCAGUAGAAGUAGACUUGCCUAUGGGGCCUUAGA  
>N340  
AUGCUAUUCCAAGCUACAAACUGAACAAACACACGGGUCA  
>N341  
GAAAUACAAGAAGCAUCGAACUAGCAACUCCAGGGUUUUG  
>N342  
GGGAGGCCCCUUUAGAAGAACUAAAAGUUAUUUGGGUUGC  
>N343  
AAGUAAAUUCCGCCCCUAGACUUCCCCUAUUUCCUCUCCG  
>N344  
GAAAUAAGGGUUGGGGUCAGACUCCUCUACCCCUGCGUGGU  
>N345  
GGCCUGAAAUGAUUGAAAGACUUUAAAUAAGGGCCAAAUG  
>N346  
CUUCACAUUUGACAUUUAAGACUAGACAUUAGUACAUUUAG  
>N347  
UGGGUGCCAUUUUUAUUCAGACUGCCACACCUUCCAUGAC  
>N348  
UGACCAGCACUUAACAGUAAACUACGGUGAGAGUGUUCACU  
>N349  
GGAGAACAGGAAAAUAAAAACUAUGGCAGUUCUAGGCUAA  
>N350  
ACCAGCAUGCAUGCCCCUGGACUAUAACUAUUUGUUACUAU

>N351  
AAUGUCCCCAGUUUUCAGACUACAUCAGGGCAAUCAU  
>N352  
AUAGGGAUUUCACUGUCUGGACUCACUAAAUGUUACCCUAC  
>N353  
ACUUGAUGUGUGGUUGUGGGACUGGGGAAAAGGAUGGAAAC  
>N354  
UUUUUGCCACCUUGACAAAAACUAAUUGACACCCGGGAGGGG  
>N355  
GUGUGAAAAAAAAAAAAAAAAACUCUCUGAUUCCUCCAGGGA  
>N356  
GUACACUUCUCACAUGGAGAACUUGGGAUGGGUGUAUCAGC  
>N357  
AUCAGUCUGUCCCCACUUGGACUCUAGGGACAUUUUUUUGG  
>N358  
UAGAAAUGCCAAAGACGCAGACUAAUUCUGUAUUGGGGUUA  
>N359  
CUUGAUUAUCAUGAUGAAGGACUGCAAACUACCGAGAUUU  
>N360  
GUGGUCUCCCCUUUGGGCAGACUGGGUCCCAAGGUCAUUG  
>N361  
AAUUCUAAAUCAGAUAGGGGACUAAUAUCCAAUAUAUACAA  
>N362  
AAGUUCUGUAAUUGGUUCAAACUACAAAAGUCUCCCCUUGG  
>N363  
GUUAUGAAAGGCACUGCGGGACUGUGGCUCUCGAGCCACAA  
>N364  
UCGGGAAAGGAAUGGGGGAGACUGAAAAUAAUACAACAGGC  
>N365  
UGGUCCAGGCAGCUGCCAGACUGGGAUCUUUGGUGCUAAG  
>N366  
UUUGCCCAGGCACCGGCAAAACUUUUUAUUGUUUCGGGGACC  
>N367  
AACUUUUGCUGAUUAACUGAACUUAGCUCAAGCUAGGUGGU  
>N368  
GCCUAACAAAUCCUAGUGGACUUUGAUUAUUAAGACACAG  
>N369  
GUUGCAGUUGAGGGCCAGGACUAAAGGGAUCAUACAAAGG  
>N370  
GCUGGCAGUGGCUGGCUAGGACUUUUUUUUUUUUUUUUUUUU  
>N371  
UCCAUGUUGAAUUAUGAGAACUUUGAAUGCUCUUUACUUU  
>N372  
AUUUCUGUAGCCAAGAAGGACUCCCGGUGGAGGGAUAAAGG  
>N373  
AGAAGGGCUAUGUGAGGGGGACUUGGAGGUGAGGGAGCUGC  
>N374  
UCUGAAAAUACACUUUUUAAACUCUAAAUGUAUUUCAUCGU

>N375  
CCUGUCUCGUGCUCAGCCAAACUGCAUCGUUAAGUCCAUA  
>N376  
UGACCAACCUUUUAAUGAAACUUUUUGUUUAUCCACCUGA  
>N377  
AACCAUUUUGAAUACAUAGGACUCUGGGUGGGGGGUA  
>N378  
AGAAUGAGAAGAAGAGGGAAACUUGAAGUUAUUUGUGUAAC  
>N379  
UCCUCGCCAACCACAAUUGGACUUCUUGACAUGGAUUUU  
>N380  
AAACGGGCUACUCACCCAGGACUAUUAAAAAUAAAAAAG  
>N381  
AACAGUAGGAAGCGCCACAGACUGGAGCCCAGCUCUUAAGA  
>N382  
AAGAACCUGUGGUGUGCCAGACUGUUGUGAUUUUCAGUAUU  
>N383  
UUCUUACCCUCCACCUGAGACUGUUAGAUCCEAAGAAACA  
>N384  
GUGUCAGUUACAAACAAGAAACUGCCAAAAGAGAGGCCCC  
>N385  
GUAGUGCUGGUCCUCCUGGAACUCACUCUGUAGACCAGACU  
>N386  
ACACAUAACAUGAAUGUGAACUGGAUGAAAUAUAAGAC  
>N387  
AAGAAAACAUAAGUGUCGGGACUUGAACAUCAUCAAGUCUC  
>N388  
CUCAAAGACCCUAGGGAAGAACUUACUAUUUUUGCUAAG  
>N389  
UGUGAACGAUCCAUAUGGAAACUACCCAGAAGGCAUCCCGC  
>N390  
ACGCUUCUUGGGGCCCCAGACUCAAUCCCCUUCUGCAUA  
>N391  
UAACGCGGAGCGCGGGGACUGUCCUAGCAGGUGUCCC  
>N392  
ACUCAAGAUUUGCUGACCAGACUCCCUGUUGGCGUAUUGUA  
>N393  
ACAAAAAAGCCAAGGCUAAACUCUGGCUUCCUGGUUUUC  
>N394  
CUUCUUUAUGGGGUAGGGAACUUUGUGAGCUACUAAAAGA  
>N395  
CCCAAGGCUGGGAUCAGGAAACUGAGGGGUUCCUGUCCAA  
>N396  
AACCAUUUUAUUUCUUUUGAACUCUCUAUUCAGACCUAUAG  
>N397  
UACCUUCUUUGUCCGAAAAACUUUGAGAACCCAAGUUAGC  
>N398  
UUCUGGGCCUGAUAAAGAGGACUGGGCACGUGGGGUAGAGU

>N399  
UUUAACUAAAGAGGUUCUAAACUGGCCACUUGCCUUUGCUU  
>N400  
GAACCCCAACUUUCUGGUGGACUUUGGGAAGGAGCCCUUG  
>N401  
CCUCUGAGAGGAGCUGAUGGACUCCCCAAAUUAGGAACAG  
>N402  
AGACGGAACAAAAGGAAAAAACUCAACAGGGAUCUCUUUC  
>N403  
AGCUCCUAAGUGUCACAGGGACUCGAGUGGGUCCAGCGCGU  
>N404  
AGACAGGUGAGCCGCAAUGAACUAAUCCACCCGGGUUGUU  
>N405  
GUGCUGGGGAUCAACCCAGGACUUCUACAAGGGUAGGCAA  
>N406  
CAAGACUACAGCUAUUUAGGACUGGCCGCCGACCUGGACAG  
>N407  
AGAAAGCUUUUGUUAUUAAGACUAGAGGUGGAGCCCGGCAG  
>N408  
GGUGGUCUCAGAGUUUCAAACUUAUAUUUAAAACAUACUU  
>N409  
CUUAGUAACAUGUGUUAAGAACUACGAUGUGGGGGCGCCUA  
>N410  
AAAGACCCCCCCCCUAAGACUUAACCAUAGAAUACCGUG  
>N411  
CCUUCAACAGGACCAAGUAGACUCACCGGCAAAAGGUCAUA  
>N412  
GAGAGGGGAAUGGUGUUUGAACUCCUGACUCUCCUCUUUU  
>N413  
ACAAAUGAUGUGGGAAUAGAACUCCAUAUGGACACCUCUU  
>N414  
GGAGCCAACCAUCACACUGAACUAAGGGGGCCUGGUGGGGG  
>N415  
UAUCUGAAAUACAAAUUAGACUGAGACAUUUUUUCUAAU  
>N416  
UUUGGCCUCAGUGGGAAAAGACUUCCCUAACCCUCAAGAGA  
>N417  
UAUUUGGUUGUCACCACUAAACUCCUAGUUUAGCUCAAUA  
>N418  
UAACCAUCACUGAGAGUAGACUCCAAUGUUAUUUCCAAU  
>N419  
UGGGCGGGGCAGGGGUGUGGACUGAUCGGGAGCCGCCACC  
>N420  
UAAGCUUAGGCCCCGCUUGGACUCUUUGAACCCCUACAAU  
>N421  
UGCUGAAUGUGGGUGUCCAGACUCUGUCUGUAUCUACUUGC  
>N422  
AUCCCAAAGAGAACAAAGAAACUGGGUUUAGAAACACCUAA

>N423  
GCAACCCUACUUC CGCACAGACUCCCCCCCCCCCCCCCC  
>N424  
UAUUGCGGGGGUGGGGGGACUCUCAUUC AAUCACCACAU  
>N425  
CCACUUAACCCUUC CUUAAACUCUCCUGUGACAAGGCUGG  
>N426  
GAAUCAGGCCUUCAGUGUGAACUUGGGGGACACAAACCUUC  
>N427  
UUAUGCAAUAGGGCAUGGAACUAAUAUGGGUUGGAGAGAG  
>N428  
CUCCUGGCAGGGACAUCAAGACUAAGGAAAUGGAAACUAU  
>N429  
AAAGAAGCCGCCACUAAAGAACUAUUUGCCUUUAAUAAAG  
>N430  
AGUAGCUAGGUGAUUUCUAGACUGGGCUUCAGCCUAGUACA  
>N431  
GGGACAAACCCACCAAGGAGACUCCCAAAGAGGCGCGUUC  
>N432  
CAAGCAUGGACGGGGGAAGGACUCGAGGAAUGCUGUCACUC  
>N433  
CUAAACCCGUCUGGUCCUGGACUUUUUUUGGCUGGGAGACU  
>N434  
GAUAGAGGUAUACAGAUGGGACUCAGGGACCCAAAUGUGUU  
>N435  
GGGUUGGAAGGAGUGGCAAGACUAUGUGUGAGCUUCCACC  
>N436  
AACAAAAUUAGGAAGGAAGAACUCAGAGAAAGAGAGAGAGA  
>N437  
AUUUUUUUAACCAGAUUGGAACUGGAAUUUUCUCCACACG  
>N438  
CCAGGGUUUUUUUAAUUGAACUGUCCAAAACCAAAAAGG  
>N439  
UUUAAAAAUGACCUCUAGGACUGGGGAGAUGGCUCAGCGG  
>N440  
GUGGUUUCAGAAAGACCUGAACUUGGGUCCUAGAACCCAGG  
>N441  
AGAGGUCAA AUGUAAUCCAGACUGUUCUGUUAAAAAAAAA  
>N442  
AGGGUGGUAGGUGAAAGAAAACUCACUCACGCCAAAUAAGU  
>N443  
CCCUUAAGUGUAGAGGUAGGACUUGAGGAGAUAGAAAUGUU  
>N444  
GCCUCUGGGGGACUACAGAAACUCAACUACCAACCAAAGAG  
>N445  
AAGAAACAGAUUGGAGUAAAACUCGUCAGUCCAAUUUACCA  
>N446  
CAUGGAGAUACUCUCCUGGACUUUUCACUAAUUUCCACC

>N447  
UUCACCAUUGGGGUGCCCAGACUCAGCCCGAUGUUUAACUA  
>N448  
UAAUUAAAAUAUAUUAAUAAACUUGAAGUAUAAUAUGCUGC  
>N449  
CAUUGUUUUUUUAAAAAAAAACUUGUAAACACAUCUGUAU  
>N450  
GUGGAUGGUCAUUGCGUGGGACUAGGGUGCCAACUAUUCGC  
>N451  
UAUUUGCACCCAACCAAUGGACUGAAGCAGCUGACCCCUGU  
>N452  
AUGUAUGGCCCUUCUGGAGACUGUGUAUGCAGUAAACAGU  
>N453  
GGAGUCUCCUUGGCUCACAGGACUCCACAGAGGGCAGGCUGC  
>N454  
AGUAGCUGGAUAUAAAAUAAACUCAAACAAGUCAUUGGCCU  
>N455  
AGGAGGUUAUACAAUGUCAGAACUUGCCUGCACUGGGUUGGC  
>N456  
GUUGGAAUCGAUUAAGAGGAACUAGGUAGGUAGGUGAAGUU  
>N457  
UCAUGUAAAAUAAACCCCAAACUCCCAUGGCUACCCAGGAU  
>N458  
CCUGACAGCAGGGAAAGGGAACUUAUAAAGCCUACCUCCAG  
>N459  
GGUAGUCCAGAUUACCACAGACUAAUAAGUACUGUUUGAAU  
>N460  
ACAAAUAGACUCUGGCACAAACUAUAUGGAGGGGUUCUAG  
>N461  
AAAUGUGGUUAGGGUUAUAAACUCACAUAUCCUUUGUCUAU  
>N462  
CAUUCCACUAAAAUCAGGGACUAGACAAGGCUGCCCACUU  
>N463  
GUGAUCUUGAGGUAAACUAAACUAUUCAUACUGGAAGAAAA  
>N464  
GACAAAAAGGCCACCAACAGACUGGGAAAGGACUUUUUAUAG  
>N465  
AAGGGAUUUGUGAUGUUGGGACUUGGGGGAGGGUAUGGCCA  
>N466  
UAAUGUGGGCGACUGUCUAAACUUGGUUCCCAAGGCAUAGU  
>N467  
CCUUGCGGGUGUUGGGCAAGACUCUGCUGUCAAGGUAGCCC  
>N468  
AGCUCCAGGGCAGGUGGAAACUGGAAGGAUCCUGACGAUA  
>N469  
UGAGGCUUGAGGGCAGGUAAACUGGAUCUGAGGGCAUGAGA  
>N470  
AUUGCACCUGGGCAUUUAGACUUUUCACCUGGCUCUGUG



>N471  
AAGCUUCCCCAGAGCUGUGAACUUUGAUGAAUCAGGUCUUU  
>N472  
AAAGUAUUGUCUAGGACAGAACUUUAAAUACCCUUC CAUUC  
>N473  
UAUUGUACUAUUUAUUUAGACUACAGCAAGUUUUUAUUUU  
>N474  
UCCUUUGCCUAGUUUCUGAACUAUCAAAUAGAAACAGUGU  
>N475  
AAGCUCAGGGCUUGAUGGGGACUUACAGAGAUAGGACUGGU  
>N476  
CAUAUUCACACAGUUCCCAAACUCAAUCCCCCUUCCUCUCC  
>N477  
GUAUCCACUAUAUAAACAAACUCAAGAUAAAAACCACAU  
>N478  
GCAAGCAUUCGUAUUGGAAACUCCUCUGGACCCUCAGCAA  
>N479  
UACUCAGCGAAUUGCACUGGACUGCACGUUGUCAGUCCUGC  
>N480  
CAAUCCUGUAAUUUAAAAGGACUUCCCAAGGUAUCACCAUU  
>N481  
AUAUCUCUUAACAUCAUUGGACUUAUUCCCCCCAAAAAG  
>N482  
GAGGACAAUAACUUUGGGGACUCUAACACUAGUAUUUAAG  
>N483  
UGACACAGAACCCUUCACAAACUCGGGAGCCAAAGAUGGUU  
>N484  
UUGUACAUCCAGACAGGUAGACUAUAGUGACUAAUGCUAGC  
>N485  
GGGUUAGGGUCACCAUCAGAACUGUCUGGGGGGAGAUGUAC  
>N486  
AUAUAGCUGUCUCUUGUGAGACUAUGCGGGGACCUAGCAA  
>N487  
CUGUGACCGUAUGUUCAGGAACUGCACAGGUUUGUUACCAU  
>N488  
ACUGACAUGAAUCCAAAGGGACUAUUUUGUGAGCAACAAUG  
>N489  
AGGGCAUUGGAUCUCUUGGAACUCAAUUUUAUAGGUGGUUUAU  
>N490  
ACUAAAAAUACAAGCGGAGACUCCCUGCUUCUCAAGAUUG  
>N491  
AAUUCUUCAUAGAUCUCAGACUGUGGUGUGGUGGCAUGAG  
>N492  
AUCAUCGGCCGAGUGUCCAGACUUUUACAAGGCCUAAUGGU  
>N493  
GACUUGGCCAUUUUAUUGAACUGGGGCAUGC UUUGCUGAU  
>N494  
CCCCAGGGUGUGACAAAGAAACUGAUUUUCUUCUUGGAAUG

>N495  
UUGAUCUUAGUCAAAUGGGGACUGGGGGAAGUCCCAGAAUC  
>N496  
UCAGGAGACUGAUUUGUUGGACUAGCCCAAUCAUAGCCUGU  
>N497  
GAGUUUGUUGUUCAGUAUGGACUCAGUGUUUGACGGAGUGA  
>N498  
GCUUAGACCUCCUCCACUAGACUCAACCAGUACAAGUUAAA  
>N499  
GGCUAUUACAAUCCAGAAGGACUAGGAGAUAGGUCCCUGAG  
>N500  
CAAAGGAAGUCAGGACCGGAACUGAAGCAGUCUAAAUAUUG  
>N501  
CAGAUUACAAUCCUCUCAAGACUUAGAGAACCAGAUCACA  
>N502  
UAAAAAGUGUUGUUUAUGGACUCCAAAUAUUAUGAGGAGU  
>N503  
UUUUUUAGAAUUAUUUUGGGACUUUAUUUAGUUUCACUUA  
>N504  
AAAGUGGAGAAUCGCCUUGAACUCAUUGGUAGAGGAGACAA  
>N505  
GUUUGGGGACAAGUUAAGGAACUAUGAUAACCUCAGUGUAG  
>N506  
GCCAUUGCUAUCAAUUCUAAACUACUAUACAUCUUCUGAA  
>N507  
UAUGAGAGAUAAACCAGAUAAACUAAUAAUUGAAUUUUCCU  
>N508  
ACAGUUUAUUAGGAUUAGAACUGUAGUGAGAUUUUUGAAG  
>N509  
GUUUUAAAAUUAAGUGUGGAACUGGGUAUGUAGCCGACCAU  
>N510  
AAGGUGAUAGGGAGGAUAAGACUUAGAGGAGGAGAAAGAAG  
>N511  
GCAGAAAAUCAUGAGUGGAACUGAAUCUAGGCCACAUAUA  
>N512  
AAGGUUUAAACAAAAUAGGAACUAUUUUUAAAGUUUCACAA  
>N513  
UGUACAAAACCCAGAUUGGGACUAUAUUUUUCUAGAUCAUU  
>N514  
AUUUUCUUGAGACACUCUAAACUUAUUUGAAACAGUUAAUU  
>N515  
ACAGGAAAAUAUGGGUCAACUUUUGACUGUGGGAUGGCA  
>N516  
GUAGCACAGGUUGGCCUUGAACUCUUGUCUUCUUGCCUCCA  
>N517  
AAUAUAUAGCUGGGUAUAAAACUAUAUUUCUUUGUAAAGGG  
>N518  
CAUGUUAGAUUAUAAAAAGACUACCAAGACUUAGGAAUA

>N519  
CAGUUGGUUAGACUGUGGAGACUUCCAAGGGGUUGCUUAC  
>N520  
GCUAACUUGACAGGUCUGAGACUUAAGAUACACCAUUUAUG  
>N521  
CUAGGGGAAGUGGGAUCAGAACUCCCUUUAAGAAUAUCAA  
>N522  
CUUGAGAAGGGCCAUGUAAACUGGUGUCAUGGUAGGGAGG  
>N523  
UGUGUGUGUGUGUAAUAUAGACUCAGGCAUCCUAGAACC  
>N524  
CUAAACAGGGACACAGUGAAACUAACAGAAGUUAUGAAACA  
>N525  
UCCACCAGAGAACUCCUAAAACUGAUAAACAGCUUCAGAGA  
>N526  
ACUUUGUCCCAUUUCUAAAAACUAUGUCCUGCAUCUUUUC  
>N527  
UCUUCUCUCUCCCAAGUGGGACUGAGGCAUCCUCACUUGG  
>N528  
AUUAAAGGUGUGUCCUUAACUCGGAGAUUCAAUUCUUCG  
>N529  
UUAUCUUCUCAAGGAAAAGGACUCAAUUGUUUUCAAUU  
>N530  
GAAGCAAUCAUGAAAAUAAACUAAGGUUCUAGUAAGGCCA  
>N531  
CUUGGAAUAUUGUGUCCAGACUUUUACUCUGAGGUAGUU  
>N532  
AAUGUUUCCUGUCUAAAAGAACUUCAGGGACAAAAAUGGAG  
>N533  
UUCAGCUUCUCAGUACCCAGACUGCACUGCAAGUGCCAUC  
>N534  
AUAGUAUUUCCACCACAGAGACUCGAGGACAAGGUGCACAG  
>N535  
ACCGGGGAUCAAUUUGGGAGACUUAACAGUAGCCCCUUC  
>N536  
ACCUUGGAACCCAGGGAGACUACUUAUAUACACCCCAGC  
>N537  
GGUGUGUUAGGUUAUCCAGGACUUGCUGAGUUGGGAGUAUG  
>N538  
AAAGGAUGGACCAUGUAGAGACUGCCAUAUCCAGGGAUCCA  
>N539  
CAUUCUAUGAGCUACUGAAGACUUUUUUUAAAAAUGUGUA  
>N540  
AUAUCCAUAUAUAUAAAGAACUCAAGAAGGUGGACUCCAG  
>N541  
GGUAACCCAAUCACAAAGGAACUCACACAAUAUGUACUCAC  
>N542  
UCACACAAUAUAGUGGGAGACUUCAACACACCACUUUCAC

>N543  
AAAGAAAUGAGAGAAGCAGGACUGAGGGGAGGAAGUUUAAA  
>N544  
ACCUUGUCCUCUCUAAUCAAACUUAUUUGUCUGGUUGAGC  
>N545  
GAGACUUCUAGUUUUACUGAACUGAGGUGCUGUGCUGCAAU  
>N546  
GGUAAGGAGGAAGUGGGCAAACUUUUUCUAGUCCUGAUUUU  
>N547  
CUUGGCACUGAACUUCUUGAACUCAUGAAUGAACUAAAUC  
>N548  
AAUAAAGAAAGAAUUAAAGACUUUUUAGAGUUUAAUGAAA  
>N549  
GAAGUCCCUUGUUCUUGCAAACUUCAUAUGCCCCAGUACAG  
>N550  
AAAAGGCUAUAUUCACAAAACUGGAAAACCAGGAUGAAAU  
>N551  
ACAGAGCAAUUGUGAUCAAAAACUGCAUGGUACUGGUUAUAGU  
>N552  
AUUAUCUCUGCAUUUAAAAGACUAAAUAAAUGAAAGGGUA  
>N553  
AGGAAGAAAAGGAAGUGGAAACUGACAGUGAUCAGGACAUU  
>N554  
AAAGAUUGAGGGCAAGGCAGACUUUCUGUCAAAGCCUCUG  
>N555  
AGAUCAGCCCUCAAUUAAGACUUCAUUUUCAUUAUGAUUUAU  
>N556  
UCCACCAACUCAAGCCACAAAACUUAGCAACCCAAAGACUCC  
>N557  
CUGAACUCUUAUUGCAGUGGACUGCAGAUUCUGAAGUGUGU  
>N558  
CAAUCCACUAAAUCAGGAACUAAACAAGGCUGGCCACUU  
>N559  
UUGUUGGGGAUUGCAUUGAAACUGUAGACUGUUUUCGGCAA  
>N560  
UGGCAGGAUUGCCAGGUAAAACUCUUGUGGUUAUUUGCUGA  
>N561  
CAUCAAUUAUUAUUAACCAGACUCCUCUGAGCUCCAGGAA  
>N562  
CUGAGUGCCUCCAAAAGAAACUAGAGAGAGCAAACACUAG  
>N563  
UUUCCAGAUCAUAUCUGAAAACUAAUACUAUCACAAUGUUA  
>N564  
CCUAAUCAUCUAGAGCCAGGACUUUAGGGGCCUUCACCUUC  
>N565  
CACAGCUAUCCACAACAAGGACUUGAGAGUUUAGUGCAGA  
>N566  
GUGGGGGGGGCUAUGGGGGACUUUUGGGAUAGCAUUGGAA

>N567  
ACUCACCAGCCUGGUCUCGAAACUCAGAAAUCCAUCUGCCAU  
>N568  
UGGGAAACCAUGAAAGCAGAACUAAGAGUAAAAUUCAUAGC  
>N569  
CAGAAUAGCUAAGAUCAAAAACUCAGGUGACAGCGGGUGCU  
>N570  
AGGCUACAUAUCCAGCAAAACUCUCAUUAUAUCAUAGAUAG  
>N571  
GCAUAGGGGCCCUACACAAAACUAUCCUCAGGCUCAUCAC  
>N572  
CCAAUCGCGCGGAACCUGAGACUGUGGUACAUAGGGAAGCA  
>N573  
CCCGCAAGGGCCACACGGGACUCCCCACGGGAUCCUAAGA  
>N574  
GAAGUGUUCUGUAAAACAGACUGUUGAGAAGGAUUCAACU  
>N575  
CAUUUGUUAUUAUAACUCAAAACUGAACUAAUAUCACCCUUG  
>N576  
AGCCUGUUUUGGGAAAAAGAACUACUGGGCAAUCUGAGCUC  
>N577  
GGUACCUCUCACUGGCUUGGACUGAGAGUUUGGGGGGAAAC  
>N578  
AUCUAAUUAAGAACUAUUGGACUUAUGGGGAAGUAUGCCU  
>N579  
AUCCAGGAAUUGGUUUUGAGACUGUAAAGACAGUCUCCUGU  
>N580  
UACUGGUUCACCCAAUGAGACUGGUCAUACCGUGAGUGGG  
>N581  
GAAGUUUCUUUUUAGAGAAACUGUGGUUAUAUUGUGUGUUU  
>N582  
AAUAAUUUAGGGAUCAGCAGACUUCACGCUUAAUAAGAUGU  
>N583  
AUCCUAUGAAGAACAAGAAACUGGUUUUUAUUUUCACGGGA  
>N584  
CAGUCCCCUUCCAUCUUGAACUCUCCUUGGGCUUCUCAGA  
>N585  
CCUAUGUAGCAAAGCAUGGAACUAUAUUUGAGAUCACAGUG  
>N586  
UGUAAAUUUUUCUCCUGAAACUGUUUUGUUUAAAAGCUA  
>N587  
AAAAUAUGGAUAUAGAUAGAACUUUGUAUCCUGUCCUGGU  
>N588  
GCCAUGCAGGCACAGCGGAAACUGCUUCUCACACUUUCUGA  
>N589  
GUCUUCUCAUUGUGUCUUGGACUUCUGGAUAUUUUGAGUU  
>N590  
GAACUGGGAAAAAGGACCGAACUGCGAUGACUGGGGAAGAA

>N591  
GGGAUAGCAGCUCUUACAAAACUUACAUAAAAGUCAAUAGG  
>N592  
GGGUUUCAGUAUGCAGCAAACUGUUGGGUCCUGUUUACAU  
>N593  
GUUGAUUUUUUUUAGGGGGGACUAGACGUAGUUCACUGUGU  
>N594  
ACGAUUACACUGCUCUUCAGACUUUGCUCCCCAGAUGGAUA  
>N595  
GGAGGGAGGGAGGAAUAUGAACUCUAAAAGAACACAUUUGAC  
>N596  
AGAGGGUGUGGGAGUUUUGGACUCCACAGACAAGGUCAGAG  
>N597  
UAUGGUCAAGUAUGUGUAAAACUUGGGGGAAAGCUUUAUGA  
>N598  
AUUUCUUUAGGGGAUAUGGGACUGUUUAGAAGGUCAACUUG  
>N599  
AUUCCAGCCAUGGACCAAGGACUCUUGCUCACAUGAAAACC  
>N600  
AAAAAUCACAAAGGGAGAAAACUUUGGAAAUAGAAAACCUA  
>N601  
CCUGGGGAUUUAUCCCAUAAAACUACCAUCAAAACCUAGACAC  
>N602  
UAGCUUACUUUUAUUGUGGGACUUCUAACAGUGGGCAAAGG  
>N603  
AUACAUUAAAAAAGGUAGAACUGGCACAUUCCUGUGUUUGU  
>N604  
UGUGGCUUCAUUUUCAUUAAAACUCUAAAAAGUCUUUAAUUU  
>N605  
GAUCUCAAAAGUCCAAAGUGAACUGCCUCUCCCAGCUUCUC  
>N606  
GCCACAUGAACAGAAUCCAAACUCUAGCAACAAAAUAACA  
>N607  
CAGAUGUCCCUCAAGAGAGGACUGGAUACAGAAAUGUGGU  
>N608  
CUAUAAAAAGAAUCAACCAAACUAGCAGCUGGUUCUUUGAG  
>N609  
AAUCCCACCAACAAUGGAGGACUGUUCCUCUUUCUCCACAU  
>N610  
UUCUUUGAAGGUCUGAUUGAACUCUGCACUAAACCCAUCUG  
>N611  
CUUUUGUUAUAACAUGUAGACUGAAACAGAGUAUGCUAUA  
>N612  
UGGUUGGGUGGGGGAAAAGGACUGAAGCCCUAAGGGUCAAC  
>N613  
UCUUUCCUGCCAUCUGUGGAACUUAUUAGUGGUGAUUUCAU  
>N614  
GUUGUAAGUCUGACAAAGGGACUGUAAAUAAGCGUGCAGC

>N615  
GACAGCCACAUAUUUUUAGAACUACGUUUCAGAGCCAUCAU  
>N616  
UCAGAUGCCGUAGGAUUAGAACUGUGUACCUCUCUCCUCA  
>N617  
AGUGGCACCCAAGUGAAGGGACUGAACAUGGGGGGUGAAGG  
>N618  
UUAUUUGAUUUUAUGCAUGAACUAGAUUAAGAAUUCAAAUU  
>N619  
CUUAAAACUAAAACUGAAAAACUGUGCCCUCUUCCUUCUG  
>N620  
UCCCUUCCGCUCUACUCGAGACUCGAGCCCCGGGCUACCUU  
>N621  
AAAUUAUUCACCUAUAAAACUUGCAUUAUAAAAUCUGC  
>N622  
GAGCUGUGGCCGAUGGACAGACUUACCCAGACCUAGUCAGC  
>N623  
UGGAACUUGUCCAGUCCAGACUCACCUUGAAUUUGGAGAU  
>N624  
UUUAAAUGCUCUUCAUGAGACUUAAACAGAGAACAAAGCC  
>N625  
GGCUUUUUUUGGUUGGAGACUAUUAAUAACUGCUUCUAU  
>N626  
CGUGGAAAGAUUUGUGUGAACUUGGUUUUGUCGUGGAAUA  
>N627  
UUAACAAAUCAGAAAGAAAACUGAGAUGUAAAAACAGAAU  
>N628  
AAACUUCUGUAAGGUAAAAGACUGUCAUAAGACCACAAGG  
>N629  
AGGGGAUUUUCGGAGGGGAAACUAGGAAUUGGGAUACCACU  
>N630  
GAAGGGGGAUCAAGACUGGACUGUGAAAAAGGAUUAAGA  
>N631  
UAGAAUGUUAUAUUGUUUGAACUUGUGAGGGUUCUCUGCAU  
>N632  
AAUUCUCCAGGGUGACCAGAACUCAGUCAACAUUUACUUA  
>N633  
AUUAUUACAAAAAAAAGAGACUGUUUCCCCAUGAGAGGUC  
>N634  
AAAAACAGAACAGCACCUGAACUGGAUGGAUUUGUAAUUUU  
>N635  
UCCAUCGCCUACAGAGAAAACUCUCAUCACCAGUAAUGGU  
>N636  
AAAUAGGAUUUAGUCCAGGACUCACAGGGACGAAAUCACU  
>N637  
CUCUCUUACAAAUUAUCAAACUAUUACAACCUGCUCAACC  
>N638  
UCACAUCUAUUCUCCUUUGAACUUAGUGUGUCACACCUGAG

>N639  
AUGUCUGAGAGCUGCAUAGAACUGGCACCACCUACACCUAA  
>N640  
CCCCAUUAUAGACUACAUGGACUUUCCAAUCCAGAGUUUCU  
>N641  
AAAAACAAUGACUUCAUGAAACUCACAGGCAAUUGGAUAGA  
>N642  
CUUUGAUCAGCAGGUAAGAGACUCUCUUCAGAGGACACAG  
>N643  
AGUUUUGUUCUUUGUUUUGGACUAGUUUUUCAUUUUCUUU  
>N644  
AUGUUUGUGUACUUCCCAAGACUUUAGGAGCUAAAAUUUAA  
>N645  
UGCAGAAAUGUAUGUUUAAGACUAGAAAUAUCCAAUAAAG  
>N646  
UAGUCCACUCUCAUCCAAGACUGGCUCAGUGUAUCCAACC  
>N647  
AUAUCUUUCAACUUCAGUGGACUCAAUUCCCAAUAAAAAG  
>N648  
UCCUAAAAGAAGAGGCAGGGACUGAUGUCAUACUGGCUUC  
>N649  
CACCAUCAUUUUCUGUAAGGACUGUGAGCAUGGAUAGAACU  
>N650  
AAAAAUCAGACUGCCUAAAACUAAAUUGUGUGUGUGUGUG  
>N651  
AUUCAUUUGGAAUAACAAAAACUCAGGAUAAUGAAAACUAU  
>N652  
UCCCAAUAAAAAGACAUAGACUAACACACUGCAUUAUUA  
>N653  
CUCUUGCAGUUUGCAGCAAGACUGUUUCUUGUCAGUGAUUU  
>N654  
AAAGGGACUAUUACUUAAGACUAAGUGCCACUUAUCAA  
>N655  
AUGCACCUAGCCCUAAGAGACUGGAGGCCCUAGGGAGUUU  
>N656  
UCUUUGUCCUUGAGAUGAGAACUAAAUAAAAAAAAAUGCCUU  
>N657  
UAGGGGAGGGGAGACUACAGACUUGGUGGGUGACAUGUGUC  
>N658  
UGCCAGGAGGCAUGCCAGAACUCCUGUAGUCCAAUGCAGG  
>N659  
CUUGGUCCGGGACCCGCCGAACUUAGGAAAUAGUCUGAAC  
>N660  
GAAUGGAAAACAACUCUUAGACUCCAUAUAAUGCAUCAUU  
>N661  
UGCUUGCAGCCAUCUAUUGGACUCAGCACAGGGUCCCAAU  
>N662  
GUUAAUUUGUGUUACAAAGACUAAUUUUGC UAAACAAUC



>N663  
AGAGAAACUAAUUUGAGAGGAACUAAGGAGUGUUAGCUUUGU  
>N664  
UGGGUGGGGCAUUAGCCAAAACUAAGUAUGCAAGCAAUUC  
>N665  
ACCCAACCAUGAGGCUCUGAACUAACAGGCAUGUGGAUGAG  
>N666  
AGGGGUUCUGAAUGCCCCAGACUCAGGAGUCUACCCGAAGC  
>N667  
CUGCUAUGCCAAGAUUUUAAACUCCGGUUAUUUAUCAAUA  
>N668  
GACAGAUCUGUGUAAGAACUUCAAGUCUAUGAAGAAAG  
>N669  
CUACAGUAAAUAAGAUCCAAACUAUUUCCAGAGGGACAGUC  
>N670  
AAAAGUGACAGAAGAGAAAGACUUUCUGAAUUCUCUCUCCC  
>N671  
GCACCCUCUCACCUGUUCAGACUAAUUUCCUAAGUUCGGUG  
>N672  
AACAUUGAUUUUUGUUAGGACUUUGUAAACACAAACCCAU  
>N673  
GUAUAUAGAGAAGGGAGGGGACUCCAGUAGGGGCUAAGGAA  
>N674  
AGCCAGUGUGGUCACCCAGGACUGUAACUAUAGCUCUUGGG  
>N675  
AAGUCUCCCAAGGCUGAGAGACUUGGAGAAGGUGGCUCUGC  
>N676  
GCCAGCGAUACAGCAUGCGGACUCGGGGACAACUCUGGGUU  
>N677  
GGAACAAGAGCUCAAUUAGAACUACCCCACACCGGUUGUUU  
>N678  
AGGCAGGCAGGGCUCUGCAAACUCAAGCUAGAUUGGUCUC  
>N679  
GGAAAAGGUUUGAAGAGAGAACUGGUAGGCUGGAGCCCUGU  
>N680  
GACUUACUUUCAUCAAGAACUGUAACCUUAGCUAAAACA  
>N681  
UAUAAGUCAUCUUAAGAAAGACUGUCCAUGAGCCGGGUGU  
>N682  
AGAGAGAGAGAGAGAGAGACUGUCCAAAUAUAGAGGCAU  
>N683  
GCCUCCAGGGAACCAGCAAGACUGGAGGGGAUAACAGGGCG  
>N684  
UGCCCUAAAAGUUAAAAAAGACUAUUGAAGUUUUUAUAAC  
>N685  
AAAUGAAAUCUGAGAUUUGAACUUUAGUUAUUAGGGGUUUU  
>N686  
AUGGCUGUGGCUGAAUGCAAACUGGGAAAUAUUUGGUGGC

>N687  
UUUGACGGAGACCCCUUAGGACUUUGUCAUUUUGUAAGGGA  
>N688  
GGACCUGCCGUUACCACUGAACUUUGCCUAGAGACCAUAUA  
>N689  
CUUCCUCUGGGUGUUGUGGGACUGGCUGUGGAGUUCGUGCU  
>N690  
GAAAAGGGGAACCUUUCAAACUAUAAAACCCUUCCCUCAA  
>N691  
UGGGGAAGUCCAUGGUCUGGACUAACACCUGAGGCCAUGUU  
>N692  
CGGUGGCCCCAGGGAUCAGACUCUGCAUGUACUCAGGUGA  
>N693  
UCCUGGAGCUCACUUUGUAGACUAGGCUGGCCUCGAACUCA  
>N694  
CUGACCAGAGAGUAGGGAAAACUCUGGCGGGGCAGGGGCCU  
>N695  
AAAAACCGAGGAUAGCAAAAACUCUUCUCAAGGAUAAAAGA  
>N696  
GGAGGUAAGGGUGUUAGGAACUUGCGCCAUUUUCUUUCUU  
>N697  
GAUGGUACCCCUACAAUGGACUGGGCUCACCAUCAUCAU  
>N698  
UCCACCUUGAUGAUAACGGACUUGAACUCUGAACCUUGUA  
>N699  
AGGCAAAGAGUUUCAUGGAAACUCACCUCUGGAGUCUGGC  
>N700  
CCACAAAUUGUACAAGGAAACUCCUAUAGCUAAUAAAUAC  
>N701  
UCCUAGGGAUUUUCCACAAACUCCUUUUUUUUUGUAUGCU  
>N702  
AAAGAACAAGGCUUACAAGACUGGCUCAGGGUCUGUCGAG  
>N703  
GCUAAAUCUUUAAGAUCAGACUCUAUUUUAGAGAACCUGA  
>N704  
GUCUAUCAUAGUGGGGUAGAACUAUGGAGGUUGGAACACCA  
>N705  
CUGUUUUGGUGGAACUCGGAACUAUGUGUUUUCUCUAGG  
>N706  
GAGUGGCUCUGAGGCCAGAGACUUGUUUAUCACCUCUCAU  
>N707  
UGUAAAGACCAACAAUAUAAAACUAACUGGGGCCCCUCAGA  
>N708  
CCAAGCCCAGAGAACUACAAACUAAUUUGGGUAUUACGUAU  
>N709  
AUGAUGAAUAUGUGUUGGGACUCAUGAACAUGUAAGAUGG  
>N710  
CUUUAUUCAUAGUAGCCAGAACUAGAAAUAACUUAGUUGUC

>N711  
AUUUUGGAUAGAGCUUGGGAACUUGUAAGCAAGAGUUAAGA  
>N712  
ACAACAUUUUCAGCUUUAAAACUGCUUCCAUCUCAAGGGGA  
>N713  
UGGUGGUCCAGUCCCCAGAAACUCCAGGGGGUCUGGCCUGU  
>N714  
AAAGAUAGUUUCAUAUCAAACUGCAUAGAAGUUCCCUUG  
>N715  
UUUAGAGACUUACUCUAUAAAACUCCAAAGUAUUGUUUCCAG  
>N716  
UGUCAGCUUCUGUGGUGCAGACUCUCACCUGUGCAGACUAA  
>N717  
AAUUUCUAAGAAAUUUGAAAACUGAAUGUAAAGUUAUUUA  
>N718  
GUGCAUCUCUAGUAUAGUAGACUCCCUUUUAUGGCCCAAU  
>N719  
GUAUUAAAGUCACCAUACAGACUUGGUUAGGGAAUAUAGU  
>N720  
GAUGAGAGCCUGUCCAUGAGACUCCUUUGAAGGCUUAUGUC  
>N721  
GUGGCCUCAAAAACACAGGACUGUUGGUGAGAACCUCAUG  
>N722  
CUCAUCUGUCGGAUCAUAGGACUGUUC CAGGUAAGGGUGAG  
>N723  
GUGGUGGAGCUGGUGGAAGGACUGGAAGAGUGGCGGGGGGA  
>N724  
UAAAAGUAUAUAUAGUAAAACUAAAUCAAAACACUGGGAC  
>N725  
CUAAAGUAUUCACGACAAAACUAAAUUCACCCAUUAUCUC  
>N726  
AUUUUACACCCUAGAGUAAAACUAACAUGUAGGUGAUGGG  
>N727  
UUGGACAUCAAGCCCCAAGGACUCACAAUGCUAUGGUUGCA  
>N728  
AUUUUAUCCUGGCCCAUAAAACUCAUAGAUAGUUUUUUUU  
>N729  
UGAGCCAAAAGAGCUAAAAGACUCUUAUCCUGUAUUAGGAG  
>N730  
AGAGGGGGCACUGACCAUAGACUCAAAAUCUCCGCAACUGU  
>N731  
CUCUUGUUAUUGACCAAGAAAACUCAAACUGGGUUUAGUAAU  
>N732  
GAAAAAUAAUACUUAGGGACUUAGCUUUAGGAGGGUACC  
>N733  
AUUAUAAUUUGGAGUUGUAAAACUCAUAAAUCCGUGAUCUU  
>N734  
AACUGCAUAGCAUUUUAUAGACUGGACAUGCCUUUGUGAUA

>N735  
UAAUCACCACACCUCCAUAAAACUACUACUUUAACUGGAGAG  
>N736  
UUUGUCAAAUCGAGCAUCAAAACUUUUUUAUACAGAAGAAAAU  
>N737  
UGAGCCCACAAUAUACCCAAAACUUAUGGGACACAAUGAAAG  
>N738  
GUGGCAUAGCAGGCCAAAAAACUAGGCCUCCUAAGAUACUU  
>N739  
UUUAAAAAGACUUAAGCUGAACUUUUUCUCUUUUUAUUUCU  
>N740  
GUAUUGGAUUUAUUCCUAGGACUCAAGACCUAGCUAAUUUU  
>N741  
UACUGCCUUUUGGUUUAAAGGACUGGACAAAAGGAUGGCCGA  
>N742  
UGGGCUAGAGGAGAAGGUGAACUCUUAUUUAAAGUAGGUUG  
>N743  
AUAUUGUGGUUUUGUCCUGAACUCAAUUUUGAUUAAAGGUG  
>N744  
CACCAGACUUCUCACCAGAGACUAUGAAGGCCACAAAGUCU  
>N745  
UGCAGACAGCCAAACAUUGGACUGAGGGAAGUUAGGGUGAG  
>N746  
UCACGAGUCGAGCGGAAGGGACUUGUGCCCCAGAUACAGGCC  
>N747  
UUUUUUUCCUCCAUUCUAAAACUGGAUGGGGAGAUGUGGAC  
>N748  
UGUUAUGCAGAGUAAACAGGACUUGCACAUGCCCCUCUAU  
>N749  
GUACCUGGUGCUGUACCUGGACUUGGUUAUAAUGUAUAAGAA  
>N750  
UCAUUGAUCUUUUGUUUGAAACUGGGACUUAGGAAAUCCAG  
>N751  
GUUCCUACUGAGAGGAGAAAACUGAUGACUGUACCUCUUA  
>N752  
AGUGGCUGAUCUUUCAAAGACUGCUGCUGGAACAGAUAAA  
>N753  
AAGUGCCAUAUAGGGGCCUAGACUCCAUGUCUGUCUUGGAAA  
>N754  
UAAUAAACGGGUUAUGUAAAAACUACAGGAAGCUACGCUAUG  
>N755  
GAUCACUGGGUAUUCACAGGACUAGAGUUGGUAAGGUAAAA  
>N756  
AGAACUUUGAGCUAAAGCAAACUCUAUCUCCUUAUUUAAG  
>N757  
CCUUGGAAGGAGUUACAGAGACUAAGUUUGGAGCUGAGAUG  
>N758  
AUGCAGAUAAAAGAAAGAGAACUUAGAUAUUGGGCUUGAU

>N759  
CUCGGUGUGACCUUAGAGACUGGUACGGACAGAAGUUUA  
>N760  
UGGUUUGCAGAGGGUUCUGGACUCUGAACGAUAGGAGGUG  
>N761  
ACGGGUCCAUCGGGCUGGGGACUCAAUUUCUCCUCGGUUCA  
>N762  
UUUUUUGAGAAAGAACUUAACUUGGUUGGGUUGGAAGGGC  
>N763  
UAAUAACCUGUUUUGUGAAGACUGUUUCUGAUAUGUUUUC  
>N764  
ACUAACCAGUACCCCCCGGAACUCGUGUCUCUAGCUGCAUA  
>N765  
UAAAGAGAAUGACAUGCUGGACUGGCCCGGCACCUCUUAU  
>N766  
ACCCAGGUUUGGUUCACAGAACUCAUGUGGUGGAUUAUAAC  
>N767  
GAGACACGAGCUCUGGAGGACUGGUUAGUUCAUAUUGGUG  
>N768  
GAAAUUUUUUUUAAAGUAAACUUA AAAAGGAGAAGACAAG  
>N769  
GGCCUUCUAAGGGAGAUAGACUGCGUCUCUAUAGGCAAAG  
>N770  
GCAUAUGAAGAAUUGUCUAGACUCAAUAAAUUGAGGGAGAA  
>N771  
AGACAAAGCUUGGAACAAAGACUGAAGGAAAGACCAUCCAG  
>N772  
GGAUAGGGAGUUUCCUGGGAACUGGGGGAGGGACCAGGAAA  
>N773  
UAUUGGGUUUUUUUCUAAAACUUUAAGAAAUAGUAGUA  
>N774  
GGUAGAAAGAAAUAUUAAACUCAGGGCUGAAAUCAACCA  
>N775  
CACCCCAGAGCUCUCCUGGACUAAAUCACAAACAAGAGUA  
>N776  
UACUCAAGGAGCUAAAGGGAACUGCAACCCUAUAGGUGGAA  
>N777  
UUGGAUUAACUUAACUAUAGACUGGCUUCCAAUGCUGUUAG  
>N778  
AGAAACAUCAGGAUGUUCAGACUGGUGUUACAAGUCCAACC  
>N779  
UGUAUGGCCUCUGUUCAGGACUCCAAAGUAAUCCACCUGG  
>N780  
CCCUAUCAGUAUGGUCUAAAACUUAUUAUGC UUAGUGCCCC  
>N781  
AGAGCUCACCCAAACCCAGAACUUUCAGCAAUAACAAUUUG  
>N782  
UUAAAAAAAAAAACAAACAAACUUGCCAACAUGUCUUAUUG

>N783  
UAGAAUUCUGUUUCAAAGGACUCGCCAUGUUC CCAAAGCG  
>N784  
UAUAGACACUGGCUAGCUAGACUCGUCACGUGGGCAGUUCU  
>N785  
UUUUUAUACGUUAAAUAGGACUAGAAAAGGGGAGUUCAAA  
>N786  
UCAAAAUAUACCAGGAGGGAACUGGAGGGUUGGUUCAGAGG  
>N787  
AAAACGAACACAGGAGAAGAACUGCGCC CAGCUGAACUUGG  
>N788  
GUAAUUCUUUGAAGUAGGGACUAGGCUCAGGGGUAGAAUA  
>N789  
AAGACUGCUCUACAACCUGAACUAUUGUUGGAGAAGGUGCG  
>N790  
UAGGAAUUGCCUAUGGAAGGACUCUGAACGUCUUCUAAAUU  
>N791  
UUUUUUUUUUUUUGAGAGAAACUUUACA UUCUCAGAGGAGA  
>N792  
CACAAUUCGUGGCCAGGGGACUACCUUCCGUGGUGCUACA  
>N793  
CAACUAAUGCAUUGUAAUGAACUUGCUUGUUGUAUUAUGA  
>N794  
GGGAAGCCUAGCAACCCGGGACUCCA UUGGGUUGGGUUAU  
>N795  
CUGCAACUAAUAGAAAAGAAACUGCAGAAGAGCUUCGAGGA  
>N796  
ACCACAGAAAUAUACACGGGACUCUACCCACUGCCUUGCUA  
>N797  
GCAACCCAGCGUGGUAGUGAACUUGAAAUAUUAUCAAUCA  
>N798  
AGGAUUAAAUGGCAGAGGAGACUUUCAAGAGGUGUGAGUA  
>N799  
ACAGCCAUUCCCCGCUCAGACUUCGAAUACAGUAAUUAU  
>N800  
UCACAUAAAUAAGGUUCUGAACUUCAGGGUAACAUUUAAAA  
>N801  
ACCAACCUUCAGAAUAAAGGACUUUUGUUAAGAACCUGUU  
>N802  
GUACUCACAGGGUUUCCAAAACUCACCCCACCGCCCCACCC  
>N803  
GUUUGUGUAUAUGAUGGGGGACUACAGGCUCUGGCUGUCAC  
>N804  
UAGAUUAUCACAAUGCUUAAAACUGUAGCCUCAAGGAGCACU  
>N805  
UAGCCUGUGUCUCUGGAAGGACUGAGUGGGGGGCAGGGUGU  
>N806  
UUAUUGUUAUUUCCAGAAAACUGGCCAAAUCUUGGGGGGU

>N807  
AUUUAUCACAAUUGUCAAAAGACUUAUCAAAAACCCUAUGUA  
>N808  
CCUCACUUAGCAACAUCCGAACUGAGUGUCCAUCACUAGG  
>N809  
UAGCUGGGUCUAUAGGUAGAACUAUUUCCAAUUUUCUGAGA  
>N810  
UUGUUAGAAACUGGACCUGAACUUCAGCUACGUUGUACAAG  
>N811  
UGCCUUUGGUCACGUCGAAGACUUUCCCAUUGACCGCGAGC  
>N812  
GUCCUUUUACUUGUGGCCAAACUCCUGGGGGCUCUCCCAU  
>N813  
CUGCAGGCUGCGCGCUGAGGACUCUUCUCGCCUUCUCCCU  
>N814  
UAAUGUGGGUGAAUGUUCAGACUUAGAGCCAGGCUUUAUUAU  
>N815  
GGCUUGGUUAUAAAUUUAGAACUGGUUAUAGAAAAACAGCUA  
>N816  
UAACAAGGAACUGGGUUUGGACUUGUUCAGAAAAAAAAAAG  
>N817  
AUCCUUUUUAAAGCAAUAGACUUUUUACUACGCUGCUCUG  
>N818  
UACUGCACACGUCUGACUAAACUUCUCUCCUCUUGGAAAG  
>N819  
AGUUGCUGCACCUGCAACAGACUCUUUCCUUGUACCCUUC  
>N820  
GUUGAUUUCCUUAACAUAACUACUCCACACCUUUGGAU  
>N821  
GGUGUAGAGGAGCCGCAAGGACUAAAGGAAGGAGAAACUGU  
>N822  
CACGUGGAUCCAUAACUAGACUAAACGCGGGAACGGAAUAU  
>N823  
GUGGUGGCCUUCUACCUGGAACUUUUCAGCCUCUAAGUCUG  
>N824  
UAAGGAAGCAGGUAACCCGGACUGAUACGGGGCUCAAGUCC  
>N825  
ACUCCUCCUCCUCCUCCUAAACUUUUGAUUUUAUUUUCAGG  
>N826  
CGUGAGGAUACCUUGUGUGAACUACAAGUAACGUCGGAAAC  
>N827  
AUGCUCUGAGGAAAGAAGAGACUUCAGCAUACUUCCUGUU  
>N828  
UCCUUCUUUACAAACCAAAACUAGGGCACAAGACGCAAAG  
>N829  
AUAUACCUACCAAACACAGACUCAGUGCUGAUGGGGGAAG  
>N830  
CGGCCAGAGAGUGGUUAAAACUGUUCGAGACGCAUCCA

>N831  
UCUGCCUCCCGUGUGCUGGGACUAAAGGUGUGCACCACCAC  
>N832  
CUUGUGGUUGUUAGUAAAGAACUAUUCCCACCCAGCAGAUC  
>N833  
CCCACUGAUGUUUCAGGAAAACUAAGGGAAAGAGGAGGAAG  
>N834  
AACGGUUUAUACCCCUGUGAACUCACUGGAUCUUUAAUAGC  
>N835  
CACCUCACCAGGCCCAGGAAACUGAAAAGGGGAGCCCUAGU  
>N836  
AGAUCUUUAAAUCUCUCCAAACUUUGGAAUCCCCUCUCCAA  
>N837  
GCAGUGAGCUGGGGUGAGGGACUAUUCUGGAAGUCCACAA  
>N838  
GAAAGUAAGUGGCCUGUUGGACUUGGUGAAGAAAUUUGAC  
>N839  
AGCGCACGGGCCCGUGAGGACUUGCUCUGUAGGAGCCUUG  
>N840  
UGAUGGAAGAAGAGAGCCAGACUCCUAAAGUGUCCAAUUUC  
>N841  
AUCAUAGACAAGCGCCUCAAACUUACCUGAAUCCUGACAAU  
>N842  
UACUCUACAUUUGACAUGGGACUUUCUCCUCAUUUGUGUUU  
>N843  
UAACUGCGGCUCACACACAAACUGGGUGGGAGGCACACAGG  
>N844  
AUCUGUUCUGUUGAGUGGGGACUGAGCUGUAAAUAUAUGA  
>N845  
CCCUAUAGGGGUGGCCCCAGACUUAAGUUCAAUACCACGG  
>N846  
AUGAUUAUGAUUGGAUUGGAACUGCCUCUGAAUAGUAACG  
>N847  
UUGC UUAUAUGAAGUGUAAAACUGGGGUCUAGAGAUGGGUA  
>N848  
AUGUGGAUGCUAGGAGGUGAACUAGGGCCCUUGGGGAGGGG  
>N849  
AUGGUUUGUGUACCACCCAAACUGCCCAAUCAGAAAGAGUA  
>N850  
CCCCUAGAAACCGUAUAAAAACUCACUGAAAAGGUGCUGGG  
>N851  
UGUCUGUUCACAGCAGUAAAACUCUAACUAAGACAAAGUCU  
>N852  
GCUCAUACAACCAAAGGAGGACUCGAUAAAUGGCAGCCAUC  
>N853  
CAUGGCCCCUGGUUUAUGGACUUAGUUGUAUGUUGCAGGU  
>N854  
CUGUCUUUACUGGGCCCUAGACUACGUAUCCUAAAACAUAG



>N855  
GGGAGCAAGAAUAUGAGGGAAACUUGUUUUAACAGAGAUGUG  
>N856  
CCCAAAGAGUCAGUCACAAGACUUUACUUUUAGGUAACUUA  
>N857  
CACGUGGUCGUUUUAUUAGAACUAUAAAAAUCGCCGGGCGU  
>N858  
AAUAAUAAAAGAACACUCAGACUUUCCCCACCACACACAAA  
>N859  
AUGCAAGCUGAAAAGGGGGACUAUUAGAGACAUGGUUUCA  
>N860  
UUCAUAAUGGUUAGAAGUAAACUAUGAGGGUGGGGUUUUUU  
>N861  
UGGUGGUUACAUAUGUAUGGACUGAAAGGCAUUAGCAAUGA  
>N862  
AAACUUCCCCACACACAGAGACUCUUUUCCUACCCCAAACC  
>N863  
CAGCCGGAACCCAAAGCGAGACUAACCAGCGUCCUCGGCGC  
>N864  
GGAGGAGGUGGGAGAUGGGAACUAAUCAGAAAUAUUGUAU  
>N865  
UGGAGAUGGACACAGAAGGACUAGAAAGUGAAUGUGAUC  
>N866  
GACGACUGGGAUGAGACUGGACUCGGGUGUCGCACUCCCGG  
>N867  
AUUACUCUUCUAAAUGUGAACUGGCUGUUUCCAGAAGG  
>N868  
UGAAAACUCUAAAUAUUAGACUCAGGGUUGUUUGUUCUGC  
>N869  
UGUCUCCUUGGUGAUUUUAAACUGAUACCCAUCGGCUUAGC  
>N870  
UGAAGAAAUGCAGAUUGGGGACUUUGGAUUAGGAAACACUA  
>N871  
CUGCAAUCCUCCACCCAGGACUGGGUCUUAUUUAAAAGGA  
>N872  
UCCAUGAAUUUUGUCACCAAACUUCCUACCAUGGUUCAAU  
>N873  
ACACACACACAUGCAAAGAGACUGAAUAUAAUAGAUAAUUU  
>N874  
AACAGAGUCAACUGAUUGGGACUGUUGGCGGUUCCAUGGAC  
>N875  
UUUCUACAUAUCUUCUGCAAACUAGAUCCEAUGGACUAGGG  
>N876  
UUACUCACCCUGAUAGGGAACUCAGAGAAGACCAAAGUAU  
>N877  
GUGGAGUACAGUUGUAAAGAACUCAUUUGAGGAGAGGCCCU  
>N878  
AGAAGCCUUUAUUUAGCAAACUUGUAAUUGCAAUUCUUU

>N879  
UCCAAACCGGUUACUGUUGAACUCCUCCACAACAGUGCACC  
>N880  
AAAUGCUAGACGUGUCCUAAACUAGAAUCUGGGAUCUCCUA  
>N881  
GGAAUGUUAGAAGGGAUCAAAACUGCUGAACCCAAAGGAGGC  
>N882  
UAAUAGUGCCACUCCUAUGGACUAAUGGGGGCCAUUUCUAU  
>N883  
CUGAUAACAGUGUUGAGGGAAACUGAGCACCCCAACCCACUG  
>N884  
AUGAAAUCACUCAUUCAGAAACUCCUUGUCAAGAACCACACA  
>N885  
AAGUCAUUGGAUUGUCAUAGACUAUCCCUAUAACUGUGCU  
>N886  
AUUUUUUUUAAGCCAAUGGAACUAUGAGCUCCUGUUAAAAA  
>N887  
GGUGUGAGUAUUUAUUGAAAACUUGUUCAAAUUUCCACUU  
>N888  
UGGACUAUGUACCGUCCUGAACUAUAAGCCAAAACAACCCC  
>N889  
UCAGUAAAACCUUGUGUGGACUCAUAGUUUUAAAGGAUGGG  
>N890  
UUGGUAGGCUAGUACAAUGGACUCCCUCCAUAUCCUAUGC  
>N891  
UAUUUAAUGGAAAGAGAGGAACUAGGGGAAAAAAGUAAUUAU  
>N892  
UACGGGGAUAGCCCCGGGAGACUGAGGGCGAAUGCCAAAGA  
>N893  
ACUCAUCUAUAAUCAAGGAAACUAACCCAAAUUCUAGUUUU  
>N894  
CUCCUCAAGAUACAGAACGAAACUCGGGGGCGGGGGCGGGGG  
>N895  
CAUUAUAAUGAAUUAUUGGGGACUGCUCAGGACUGUCAUUUC  
>N896  
CUUAGCCCCGUAAACUGAAAACUCCAGAGACUUGUAAUUUA  
>N897  
GACCUGGGUUCGACUACAAAACUGCCCCCUGGUGGCAGCU  
>N898  
UGUGUGUUAAGAUCUUGAACUAAAACAAAGGAACUGAUG  
>N899  
GCUGAGCACCAAGACCUUGAACUUUUUUUUGUUUUGUUUA  
>N900  
GCCCAAGUUCAAUCCCCAGGACUCAUGUGAAGAAAAUAGGG  
>N901  
UUUCUAACCUGCUAAUCUAGACUAGGCCCUUAUAGUAUAC  
>N902  
UUUAAACUUACACCCUUGAACUCCUCCGUGGGGGACCGCC

>N903  
AUGGGGUGGGGUGGGGCAGGACUUGACCCAAUAAAGAAUU  
>N904  
ACAGCCCCGAGACUCCUGAAACUGUGAGUCAAAAUACAUU  
>N905  
GCCCAUGGUUUUCUGUCUGGACUUAACCCCCACAGUUAACU  
>N906  
CUAAUCCAACUCUUCUCAAACUUAUCCACAAAUAAGAAU  
>N907  
AAAACAAAACAAAACAAAAACUCACAAAUUUUAGUCAGUG  
>N908  
UGAGAGAGAAAAGCUUAAAAACUGGAACAGCACUACAGAGG  
>N909  
CCGAGUUUUCUAGCCCCGAAACUGUGCGUGCGCGUGUGUGU  
>N910  
UCCGUUAGAGAUUUCUGUAGACUGGGAACCCACGAACUAUA  
>N911  
AGAAUACUCUGCCACUCAAAACUAAGGAGAGAGCUACCCUC  
>N912  
UGAUUCCAGGACAGCCGGGACUACAUAUGAGACUCUACC  
>N913  
AUUAUUUAUGUGUCAGGAGGAACUUCUUUUCUGGCCAGUCU  
>N914  
UAUUAAGUCCCCACACCCGAACUGUACGCCUCAUAUUCAU  
>N915  
AAACCUUCGGAGGAGGAAAGACUCAUUUUUUUUUCUUA  
>N916  
CCACAAAAUUAGAGGGGAGACUGGAGUGAGUAAAACACCU  
>N917  
GCUGGGCAUAACUAUUCGAAACUGUCCCCCAUCAGGAUAC  
>N918  
AAAACAAACCUACGUCCAAACUCCCAUUUGCCUCCUCAC  
>N919  
UAAAGGGGUGGGGAAUAAACUAAGUUUUUUUUUAAUAG  
>N920  
CUUUCACCCCUGAAAAAGAAACUGGCCAUUUUAAAAAUGG  
>N921  
ACCAACUGCAUUUUGAUUGGACUAAAGACCCACACCCUAG  
>N922  
GUGUUUUAUCACAGCCUGAACUGUUAGAGAAUGUGUUGAU  
>N923  
AUUUAAAAGUUACCGAGGAAACUAUUUAAUUGGUACAUUUU  
>N924  
GGUGCAAUUUCUGCAUCAGACUCUAUCAGCUGCUUGUUGG  
>N925  
AAGGGGGCGACCCACUGUAAACUGCACCCGAGAUCCAUUUC  
>N926  
CCGAGGGAUUGGUAAGAAAGACUGCUUUUAUUCCCGUACUG

>N927  
UCCUGGUUUCCCCUCCGGAAACUCUCUAUCCCAUCCCCCCC  
>N928  
UGGGGGGGGGCGGUGUUAAGACUUCUUGUCCUCAAAGCC  
>N929  
AAGAUUUUUUGUUUUUGUAAAACUCAGCAACUCAAGGAUUAU  
>N930  
CCCCCAUCUUUAAAUUAAAACUUAUUCUUGCCCAGCCUGA  
>N931  
CAAUCUGUGAACUGAAAUAACUCUCCCUUAUGUUGAUUUUG  
>N932  
GGGACCAAUAAAUUUAAAAACUUCUGUUGGCAAUGGACAC  
>N933  
GCAUUUCAGGUUUUUAUAAGACUCCCAAAAAGGGUUGUGGA  
>N934  
AAUUCGGGCGGACGACACAGACUGUUUUUUAACAUGGCCUG  
>N935  
UUUAUACAGCAACCCCAAAGACUCUCGGGUUGAUGCGUCCC  
>N936  
ACUGACAUAUAAAGGGUAUAAACUUGAUAGUAGCGGCUCUCC  
>N937  
CAUGUAUGAAAUUCUCAAAAACUAUUUUUUGGGGGGGUCUG  
>N938  
GCCAGGUGUUAAGAAAGCAAACUCACUGUGCGGUACGUGGG  
>N939  
CGGCGAGAGGUACGUCUGAGACUUCGAGAGCCGGGCUCUGA  
>N940  
CCUGCCACACAGGCAUUUGAACUGCAGACGCAGAAGUAUUG  
>N941  
AAUUGGAAAGAAGAAGUCAAAACUAUCACUAUUUGCAGAUGA  
>N942  
GAAAACCACACCUGAUGCAAACUGCAAGAGGCUUUAUUAUC  
>N943  
UAGUGAGCGGAAGGCAAGAGACUCGGUAUUUGUGUGUGUGU  
>N944  
AAAGAGGGAACAACCAUAGAACUGACAUUUAAAUAAGAAUA  
>N945  
UUUUUCGUUGGUGGGUCUAGACUGGUGUGACUGCUGUAAGG  
>N946  
UUAUUAAUAGAAAAGGGGGAACUGUGGGAAGCCGCCCCAC  
>N947  
GGGCUUUUAGUAUUGUUGAGACUGCUAUUGUUUAUGGGGAA  
>N948  
UUUAAGAGGUCGGAAUAAAAACUGGAAAUUAGUAAAAAUAC  
>N949  
UUUUGAAGUCUUCACCACAAACUGCGAAAGUGACGGCUCAG  
>N950  
UAACUUGCGGUGAUUGAAAAACUGCCCCGAAUGAGGAUGUU

>N951  
UAAUAGGCCCAACGGGUGGAAACUGUAAGUUUUAUACAACAU  
>N952  
AUCUGGGGUGUUUCAGUAAACUCCGUGGGAGGAAAAACGC  
>N953  
CUCAUGGCGUUGUUGAGAAAACUAGGGGCCGGCCACAGGGU  
>N954  
AUUGUUUGCUUUACACAGGGACUCACGUCUUUCAGACAGGC  
>N955  
GUACAAGAAAGGAAGGCAGGACUCAAGGACUCACACAUGUA  
>N956  
AUUUGCCGUGAUGUGAGGAGACUCCGCUGCAAGCUCCUAUC  
>N957  
UUCUUUGUGGGUAAUGGGACUUCCAAUCCAUGUGUACCC  
>N958  
GGAAUGGUGUGGGCUUUUGAACUACUAAUCCAGCCCCUAG  
>N959  
ACAAAAAUCCCUAUGUUGAACUAAUUGCAUGGUUGUAAAC  
>N960  
UUUAUUCUGUAAUAUAAAAACUUCAUGGGAUUAUUAUCAU  
>N961  
CCAUGUCAAUAGAAUAAAAACUAACGCUUAUCAUACAUCA  
>N962  
GCGCCGCGCACACAGUAGGAACUCGCUGGGUUCCUUAACC  
>N963  
UAGCUCUUACGCAGCCUCAGACUUACAACACAUGUUCUAGC  
>N964  
UAGUGUGGGCAAAAUACAAAACUGGGAAAAAUUCUCUAUA  
>N965  
CUUGAACCGCCCCAACUGGGACUACAACACCGCGGAAGGUA  
>N966  
AUUCUACUACUUAAAGGGAACUUAUAUUAUUUGAGCAA  
>N967  
GUUUUCCCCACUUAUCUGAACUAAAAAAAAAAAAAAAAAAAA  
>N968  
UUGAUUUGGAACUUUAAGAAACUUGGGGCUGCAAGUAGGAG  
>N969  
AUAAGAGAGGUUGCCAUGGAACUAGAAGAGAAGCCAGAACG  
>N970  
AGUGCAGGCUCGCAAGAGAAACUCAUGACCCAGUAAUUGAG  
>N971  
GGCGCACACAAAAAGGAAAAACUACACUGCCCAGAAAGCAA  
>N972  
GUGUGUAUGAAUGUGGUGAAACUCAACGGGUCACAAUCAA  
>N973  
UCUCCUCCCCACCUCCACGGACUCCCCCAUUCUCAUCCACA  
>N974  
CGCAGAGAGGCAGUGCGCAGACUCAUUCAUUCCCCGAGAGG

>N975  
UUGAUCCAUCACUUUUUGGAACUAUUCAGGGGAGUUUCUG  
>N976  
UACUCAAAAGACAUAUUUCAGACUGUAAGAUGAGUCAAAAGA  
>N977  
UAUGAGAGCUAGGGAUCAAAACUCACACCCCCAUACUUGUG  
>N978  
AGUCAUUGGCAGAUAGGAAGACUGGAGAGUCUCCCCAUCA  
>N979  
GGCAUAAGAUGGGCUCCAGGACUCCGCAGAGGGCAGGCUGC  
>N980  
UCUGAGAGUAAUAGCUAGGGACUAUCCCACGUGUUCUCAGU  
>N981  
CAGCGGGAUGCUGUUUGGGACUCCCCUGAGCCGGGUUGGU  
>N982  
UCACUACCCCCUACCACCAGACUGUCUAUUGAUUUGUUCUC  
>N983  
CAGUCCUGGCACCUUUGGGACUGCCGCCACACCCGCUCCC  
>N984  
CUGGUAACUCCUCCCCAAACUUGAAAGAAAGAAAGAAAG  
>N985  
UACCACUGAGUUAAUUUAAACUUAAGCUCCCCUUUUUUGG  
>N986  
UCUGAGGCUGAACCCUCAGACUUAAGAGGCUAAAGCAGGGG  
>N987  
UCUGAAGACAAGCGAAGGAGACUAGCCAAUAAUUAUCCC  
>N988  
GGGUCACAACAGAUGAGGAACUACAUAAGGGUCUCAGC  
>N989  
UGUGCGCCCUAGCUGCUUGGACUGGAAGGGCCUUUAAAAC  
>N990  
AUAUGGGCAACACAAAUUGGACUUGGUGGAGUUUUUUUGG  
>N991  
UUUUCUUGUACAACACGCAAACUUAUGACGAUUGCUGUAUA  
>N992  
UUUUUGCCACCUUGACAAAAACUAUUGACACCCGGGAGGGG  
>N993  
UAGGGGAAAAAAAAACCUAAACUGUUUCCUUCCCAGCUUU  
>N994  
GGGUUAUUUGAUUUUCUGGACUCCACCUUCUUGAGUUCUU  
>N995  
UGAUUAAUUGUAGAUCUAGACUAAAGGGUAAAGCCUCCCA  
>N996  
UAAAUAUGCCGCGGGAUGGACUUUACCUGUCCACUUAAG  
>N997  
CAAACGAGUCCUGCUAGGGGACUUCGUAAUUGGCUGACACU  
>N998  
UCCUCCAGGGAAGCUUGAGGACUCGGCCAAUGCUGACGGCC

>N999  
AGGGAGGGGGAGGGGGAGGACUAAGGGCACUUUGGGGGUC  
>N1000  
UCACAAAGGCACACCCCUAGACUGGAAAUACACCCUUAUA  
>N1001  
GGAUAGCCGGGGCUUCAUAGACUUUAUCUAAAAAACCAA  
>N1002  
AAUCACCACUCCGCCGUCGAAACUUCACCCCGAGUACCGAUG  
>N1003  
AAGACUAUGGUGAAGCGGAAACUGCUGGGGGUGGGGGUGG  
>N1004  
GUAGACCAGGCUGGCUCCAAACUAUGAGAUUCUGUUCGCCCC  
>N1005  
CGUUUGGGCUGGUGUCGGAACUGCAGUAUCAUUUCCUUU  
>N1006  
AGAGGGCAGAGUCCGGGCGGACUCUGGUGGACCCGCCCAA  
>N1007  
UCCAUGCCUCAAUUGUAGGGAACUGCCAGGGUGGGGAGGCAG  
>N1008  
AGGUGUUGCAUUUUGGGAGAACUGAAUGAACCCAAAUCUAU  
>N1009  
AAUCCUUUCAAAUGUUAUGAACUGUAGCAGCAGAUUCAUAG  
>N1010  
GUAUCCAUAUAUAAACAAACUUAAGACAAAAACCACAU  
>N1011  
ACACUCAUAGUGGGGAUGGAACUCUAAUCUACGCUCUAUUAU  
>N1012  
AUCUUGGGGAUGCAUAAUAAACUAAGGGUUGAGGCUUACUA  
>N1013  
UAGACUAGCGCGGUAUUGGAACUUGGGAAUGAAAGAUUAAU  
>N1014  
GAUGUGUGAUAAAGAAACUAGACUUUUUCUAUAGACAGGCUG  
>N1015  
UUGGGAAGAGCUGAGAAAGGACUAGGGAUUUUUUUAAAAUU  
>N1016  
AGGCAGGGGGCAAAGCUAAGACUGACGUAGGAAGAACCCCC  
>N1017  
AAGGAAUGACACGUACACAGACUUAUGUGUAUAUUUAUAUG  
>N1018  
GUUGUCAUGUCUCCUCCAAACUAAAAGAGCUUAUCACUAU  
>N1019  
AUCAUUAGAGGGAAACGCGAACUUGUCCCGGGUGACAGUGG  
>N1020  
CAGAAAAGACUGAAUCAUAGACUCCUAAAAGAGAGAUUUGG  
>N1021  
AAGGAGACUGAGUUCAGGAGACUUUAGUGAUUGGAGGGGGA  
>N1022  
AUUUUCUAAGGAACCGCCAGACUGAUUUCAGAGUGGUUA

>N1023  
UGCACCCCGUGGGGGAGGAGACUAUCGCCUAGACUAUUUC  
>N1024  
ACGUUUGUJCAACAAUAAAAACUCUUUUUAUUGGAGGAUGAG  
>N1025  
GACUAGACUAUAGACUAUAGACUAUAGACUAUAGACUAUAG  
>N1026  
GUGUCUUUUGCCUUGCAGAAACUUUGGAGUUUCAUUAGGUC  
>N1027  
AUUUUCUGAGGAACCGCCAGACUGAUUUCAGAGUGGUUGU  
>N1028  
GUUGUGUCGGGGUGCCUAGGACUAGGUGGGGUGGGAGUGCU  
>N1029  
ACCAAUAGAAACAAAAAGAACUGUACAAAGAAUCUACCAA  
>N1030  
AGAGAGACUAACCACAGAAACUGAGGAAAUUCACAAAAUC  
>N1031  
AUAUGGCUGGCCUGAUUAAACUACCUGAUUGAUUAUCAA  
>N1032  
UUCUUUGAAGGUCUGAUAGAACUCUGCACUAAACCCAUCUG  
>N1033  
ACCUGGAGUCCUAAUCAGAAACUCCUUGUAGACUGCUUUCU  
>N1034  
AAAUUAGCUAGUAGGAUGAAACUUCAGGUAUAUACCCAA  
>N1035  
AGCAGAGACAAUAAUAUGGACUACACCACCAAGGACCUCU  
>N1036  
UUUACAUGAAGAAUAGAGAACUCAAAUGAUUUGGCCUAAG  
>N1037  
GUUUUUUUAUACUGUCUAAGACUCACACUAACUAUUUGUAC  
>N1038  
GGAGUGUGUGUGUGGGGGGACUUUUGGGAUAGCAUUGGAA  
>N1039  
AAACAGGACCUUCCCAGAAACUGUGUUGCUUUGGCCUGUC  
>N1040  
CACAGUAAGCUUAAGGUGAGACUACACACAGGGCCUAUAUG  
>N1041  
ACGGAAACUCACCUCUGGAACUUUGGCAUUCUCAUAACCC  
>N1042  
CCUUUCUAACUAUAUGAAGAACUGAGUUGGAAUUUUGAUGA  
>N1043  
GCUUGCUGAAAAUCCCUGGACUUUAAUUGCACUUUCUAAA  
>N1044  
AUAAAACCAGAGACACUGAAACUUAUAGAGGAGAAAGUGGG  
>N1045  
UGCACUGAAAGGAAUAAAACUGUAAUUCAUGUAAUGUAU  
>N1046  
CGUAGGAGCGAUCCCAAAGACUUCAACCCCCACAGUCCUG



>N1047  
AAGCAGGGGAGAACAGAGAGGACUCUAGCUGCUUGCAGAGAC  
>N1048  
CCCACAGGGCAGCCUCGGGGACUGCAGUGGCUGGAAUGCUU  
>N1049  
AACCUAGAAGGACUCAGGAGACUCAAAUUGUGUUGAAAAGC  
>N1050  
UUGUCUUUGAAAAGACAAAGACUGAAGUCAUUGUCACCCUU  
>N1051  
UGUGAGACAGAAGAUGUUGGACUCCCCAGAAACAUUUUUA  
>N1052  
AAUUGUUCUUUUGGAAAAGAACUGCAGGGACAAAAUGGAG  
>N1053  
CCUAUGGUGAGUGGAAAAAACUUCUGCCAGGAGGCAGGUU  
>N1054  
ACUCAUUAAGAAAACACAAAACUUAGUGGUGCAAUAGAUC  
>N1055  
UUUAUUCGUAAUAGCCAGAAACUGGGAAGCAACCUAGAUAU  
>N1056  
GGUGCAUCCUCAAAGGGGAACUGCUGCUACCUGCCUGCA  
>N1057  
AUCCUAUCAGAUCACCAUGGACUAAGGCUGAUCUCAAUA  
>N1058  
AGACUGGCUACACAAACAGGACUCAACAUUUUCCUGCUUGC  
>N1059  
CUUGC UCCAGCCACAUGAACUGUUGCCAUGGCAGCAAGU  
>N1060  
UUUGGAUGCCUGAUUUAAAGACUUUGCGCCACACUGCGCU  
>N1061  
AGACAGAUCUAACUCACCAAACUCUAGUCUGUACCACACAG  
>N1062  
UUAAAACUCUUUCCUUCUAAACUCUAUUAUUCUUCAGACUG  
>N1063  
GAAUCCUGAUCUUUCCAAGACUUUUAUCAUGAAUGGAUGU  
>N1064  
UUACCAUGUACACUGAAAGAACUCGUCCCAUAGACAUGGUA  
>N1065  
CCUUGAACUACCUUUACAAAACUUUAAAAGCAUGCUCCTCA  
>N1066  
GAGGCCAUUGGACACACAAACUUUAUAUGCCCCAGAACAG  
>N1067  
UUUUAUUAUAAAAGAUUAGACUCUUAUGGCUUUGAGUACU  
>N1068  
CUAGGCUCAAGAAAGUCAAAAACUGAUACAGGAAAAUCACUG  
>N1069  
CCACAUGCUCUCCUACAUAGACUUGUCUCAGUGAUCCCAAG  
>N1070  
GGGUAAAUUUUUUUCCAAAACUGGUGAUCAUGUCAGUCUU

>N1071  
UAGAGUUUUUACAAACUGAAACUAAGUAACAUUUGUGAGAG  
>N1072  
AACCAAGGACACAUAUAGCAGACUUAUUUGUAAGAGCCAGAA  
>N1073  
AGGAAAUUUUUGGAGGGGAAACUAAGAAAGGGGAUAACGUU  
>N1074  
AAGUCCUGAAGGUAUGUGGAACUUAGGCACGGUGAAAAACA  
>N1075  
AACAAUGAAUUUGAGUGAAGACUUGAAAGCUAAGAGGACAU  
>N1076  
UAAACCUCUCUAUGUGGAGGACUUUUACUUCUCCCAAUUU  
>N1077  
GCUCUUUUGGAGUUCUCUGGACUGUAUCUUGGGUAUUCUGG  
>N1078  
UAAAAUAUGCACAUAUAAAACUAUUUCCUCUAGGCUCACA  
>N1079  
AAUCCCACCAACAAUGGAGGACUAUUUCUCUUUCACCACAU  
>N1080  
CAGCAACUGUAAGCAGCAGAACUAGUAUGUUGCUUAAAUG  
>N1081  
UGAUUACCAGGAGAAAACAGACUCUAGAGUAGUGUAGUAGU  
>N1082  
UUUACAAAAAUGCAUGGAAACUAUGAAUAUAGAACCAUGA  
>N1083  
GGGAUCCAUUUGGCAGAAAAACUGAAAACAGAGCUAUUUCA  
>N1084  
UGAGCAGAUUUUAAGAUAAACUCAUGAACCUUAGAGAACU  
>N1085  
AAUAAAGAAAGAAUUAAAGACUUUUUAGAGUUUAAUGAAA  
>N1086  
UUAUUCUGCUGUAAAAGAAACUUUUUUGAUUAACAGUAAG  
>N1087  
AGUGAUAAAAGUUAAAAAGAACUGUGGCCAAUAUGGGCCUG  
>N1088  
CUACAAAACUCGGGACAGAAACUCCAGGCAAAAACAGGAAG  
>N1089  
UAAAGAUCUGUAUGAUAGAACUUCAAGUUCCGAGGAAAG  
>N1090  
UGACAUUCAUUGAGUUUGAAACUUGAAUAAAAAAUUAGGG  
>N1091  
UUGAAUCUUGGGUAUUCUGAACUAUUGGGCUAAUAUCCACU  
>N1092  
ACGGGGGAUACUAAGUAAGACUUCUACUCAGGAAGUCAC  
>N1093  
AGGAAAAGGGCUGGACAAGGACUGAUACAUAGACAAUAGUU  
>N1094  
AACACAACAAAGCCCAGGAACUGAUGGCCUAGUGCAGAG

>N1095  
ACCCUAUAUUAGGAAUAUGAACUAGCCAGUACCCCCUGAGC  
>N1096  
UGAUGAACACACUAAGUGAAACUGCCAGGGCAAUGUAAAG  
>N1097  
UGUAAAUCAACAUCCAGAGAACUUAUAUUUCGGAUAGCCUG  
>N1098  
GCAACAUCUGAUCCAAAAAACUCAGAGCAUCUUGUGCCAG  
>N1099  
CCUCUCCAUCUUGGGCACGAACUCAGCAGGCCCUAGAACAC  
>N1100  
AUACACACCCAAAAAGCAAGACUCAGAUUUAAAAUCAUAUC  
>N1101  
AUAGAUAAAGCCCUAGCCAGACUUUCUAAAGGGCACAAGGA  
>N1102  
CACCACUGCUCGUCAGAAGAACUGGCCUGGAACUCUCAGGA  
>N1103  
UAAAAGCCAUUAUGGUCCUGGACUUUGACUGAUUGGGAGACU  
>N1104  
GGAGCUGGAAGAACAUAUAGACUUCAGGGGACUAAGUAGGA  
>N1105  
UGAAAAGAAUGAAUUGUAAACUCCUACCUUGACUAUAGUG  
>N1106  
GUUCUUGUGAGCUCAGCAAAACUAUACUUCUAUCCAAUUUU  
>N1107  
GUAAGCCAGCCUGGCUUUGAACUUGAAAUCCUCCUGUUUCA  
>N1108  
GCUAGUGCAGACUGGAAGGGACUUGUGACCCUGGUCAGGCC  
>N1109  
UCUUUCUCCAGUGAUUACAGACUAUCUCCACAGAGGCUGUC  
>N1110  
CAGAUAGGGUUAACAACUGAACUCCCUCAUUACUAUUAACA  
>N1111  
CUAGUAGGUCUAAGUUGAAAACUGUUUGGUCCUUGUAAACU  
>N1112  
AAUCCACAGAUCUUUUCAGACUCUCAGUUUCGAUAUUUAU  
>N1113  
CCUUUUAAUGUUUCAUCAGACUUGCUUCUCCACAAAGGCC  
>N1114  
UUCUUUCAGAUAAAUUAAAACUCUCGUGUCCUGGGGCCUA  
>N1115  
AAAUGCAAAGGAAGCAAGGACUCUCAUUUUUGUUUCCGU  
>N1116  
UCUUAGCAACCUGAAGUCAGACUUCUAUAAAACAAACAAA  
>N1117  
GGCUUUUAUUUGGUUGGAGACUUUUAAUGACCGAUUCUUU  
>N1118  
UGUUUCAACACUCAGGUAGGACUCUAGAAAAGAGCAUGAAU

>N1119  
 GAAAAAAGAGUGGAGCAGAGACUGAAAAGAAAGCCAUCCAG  
 >N1120  
 AGGCUUUUAUACCAGCAAUGAACUGCUCUAUCCUAUGGUUAC  
 >N1121  
 UUUUGAUAGGGGACAGGAAAACUGAAAUAUGCAAUACA  
 >N1122  
 AUUUCUUUAGGGGAUAUGGGACUGUUUAGAAGGUCAACUUG  
 >N1123  
 UCAUCACUGCAAGGGGGAGGACUAUUAUAUAAUAGGAAAA  
 >N1124  
 UCAGAGCAAUAGUAAUAAAAACUGCAUGGCAUUCGCAUAAA  
 >N1125  
 UUGGUAGAACAUAUGUGAAAACUAUCCCAAAGUUUAAGAGU  
 >N1126  
 AGCUUGGUUUUGUUUUUAAAACUGCAUGCUGCAAACUGUA  
 >N1127  
 UUUUAUCAGUGGUAAUAAAGACUUGUAAAGUUCUUUCCUUA  
 >N1128  
 AUGAGAAACCUAUUGCUGAGACUGAAGCCUCUGGAUUCACC  
 >N1129  
 ACACACUUUUUAUAAUAUGGACUUCUAAAUCAUAAAAGU  
 >N1130  
 AACAUAAAAGAAGGGUAGAACUGGAAAUACUGGGGGCUU

**Supporting Information S4. The benchmark dataset  $S_{\xi=20}(m^5C)$  for  $m^5C$  modification in RNA.** It contains 120 positive samples whose centers can be  $m^5C$  modified as confirmed by experiments, and 120 negative samples whose centers cannot be  $m^5C$  modified. All the sequences included are 41-nt long with the cytosine (C) located at the center.

**I. Positive subset  $S_{\xi=20}^+(m^5C)$**

>P1  
 CGCCUCCCACGCGGGAGACC<sup>C</sup>GGGUUCAAUUCCCGGCCAAU  
 >P2  
 CCGGGUUCAAUUCCCGGCCA<sup>C</sup>UGCACGUGGUUGUUUUUCAC  
 >P3  
 GGCCGUGGGUGUGUAGAGGC<sup>C</sup>UUGGUGGUGCAGUGGUAGAA  
 >P4  
 GUGCAGUGGUAGAAUUCUCG<sup>C</sup>CUCCCACGUGGGAGACCCGG  
 >P5  
 UGACUGCAGAUCAAGAGGUC<sup>C</sup>CCGGUUCAAAUCCGGGUGCC  
 >P6  
 GCUGAAGGCAUUCAAAGGUU<sup>C</sup>CGGGUUCGAGUCCCGGCGGA

>P7  
AGAUGUUGGUGGUAGUAGCA<sup>C</sup>AUAUUCUAAAGAGAACUUCA  
>P8  
AGCCAGGGCUGGGCCCGGG<sup>C</sup>AGAGCCGCCGCAGGUGCAGA  
>P9  
CUGCGGUGAGUCUUGAAGCC<sup>C</sup>AGGGCUGGGCCCGGGCAGAG  
>P10  
UAUUUGAUCGGAUCGUGACC<sup>C</sup>CAGCCCCGCCGGGCCGACCC  
>P11  
CGCUGUGGUCCCCGAGGUCC<sup>C</sup>GGAGCUGGCCUCGCGGGGCC  
>P12  
GAGACUCUAAUCUCAGGGU<sup>C</sup>GUGGGUUCGAGCCCCACGUU  
>P13  
AGACGCCAGUAAUCAGUGCC<sup>C</sup>GGCUAGCUCAGUCGGUAGAG  
>P14  
GGUUCGAAUCCGAGUCACGG<sup>C</sup>AGGUGGUUCUAACUUGCUGG  
>P15  
UGCUGUUGGCCGCAGCAAC<sup>C</sup>UCGGUUCGAAUCCGAGUCAC  
>P16  
GCGCCGCCUGGUUAGUGGCU<sup>C</sup>GCCGUGAUCGUUAGUGGUU  
>P17  
GCCUCACACGCGAAAGGUCC<sup>C</sup>CGGUUCGAAACUGGGCGGAA  
>P18  
CAGGUUCCGCCUGUGGUUUC<sup>C</sup>GUAGUGUAGUGGUUAUCACG  
>P19  
AGCGUCUGGGCCAUAAACC<sup>C</sup>AGAGGUCGAUGGAUCGAAAC  
>P20  
GUCGAUGGAUCGAAACCAUC<sup>C</sup>UCUGCUAUCGGAGUUUUUUC  
>P21  
GUCGCAGUCUCCCCUGGAGG<sup>C</sup>GUGGGUUCGAAUCCCACUCC  
>P22  
AGUGCCCUUGCCGAGAGCGG<sup>C</sup>UCGUUGGUCUAGGGGUAUGA  
>P23  
CUUCGGGAGCGCCCGGAUAG<sup>C</sup>UCAGUCGGUAGAGCAUCAGA  
>P24  
UUAGUACUUGGAUGGGAGAC<sup>C</sup>GCCUGGGAAUACCUGGUGCU  
>P25  
AACACGCCAGAUCUCGGAAA<sup>C</sup>UAAGCAGGGUCGGGCCUGGU  
>P26  
UGGUCUUGUAAACCAGGGGU<sup>C</sup>GCGAGUUCGAUCCUCGCUGG  
>P27  
GAAGCUAAGCAGGGUCGGGC<sup>C</sup>UGGUUAGUACUUGGACGGGA  
>P28  
UGGCCGAGUGGUCUAAGGCG<sup>C</sup>CAGACUCAAGGUAAGCACCU  
>P29  
CCAUACCACCUGAACGCGC<sup>C</sup>CAAUCUCGUCUGAUCUCGGA  
>P30  
AUCUCUGUCUACGGCCAUAC<sup>C</sup>ACCCUGAACGCGCCCAAUCU

>P31  
CUGCUUUACACGCAGAAGGUCCUGGGUUCAAGCCCCAGUGG  
>P32  
AAUCCAAUGGGGUCUCCCCGCGCAGGUUCGAACCCUGCUCG  
>P33  
CUGCUGCCGUGAUCGUUAUAGCGGUUAGUAGUCUGCGUUGUG  
>P34  
GUGGAACCAUGAGAUGUUACCUAGCGUUUUGUGAGCCAGGU  
>P35  
AAGGCGUUGGACUUAAGAUCCAAUGGAUUCAUAUCCGCGUG  
>P36  
AAUAGCUCAGUUGGGAGAGCGUUAGACUGAAGAUCUAAAG  
>P37  
GGUUUGGGUCCGAGAGGUCCCGGGUUCAAAUCCCGGACGAG  
>P38  
GUGCCUCUCAUGUACAAGGCCCUGAGUUUGACUCCCAGCAC  
>P39  
AAGGCGUUGGACUCGAAAUCCAAUGGGGUUCCCCGCACAG  
>P40  
CCCGACGGGGAGGUGUGUAGCUGCACUUUUUUGGCGACAGU  
>P41  
CUGCGCGAGCCACAGCCCAGCAGGACCUCGUGGCGCAACGG  
>P42  
AACGGUAGCGCGUCUGACUCCAGAUCAGAAGGCUGCGUGUU  
>P43  
UGC UUUGCAUGUAUGAGGCCCGGGUUCGAUCCCCGGCAUC  
>P44  
CCCGACGGGGAGGCCAAGUACGUUUUUACCAUUCUCCGUA  
>P45  
CGUAACGGCUGCCGAAUAGCUCAGUUGGGAGAGCGUUAGA  
>P46  
AGGUGGCCCGGGUUCGACUCCGGUAUGGGAACGCUUCCUU  
>P47  
UGGUCUAGCGGUUAGGAUUCUGGUUUUCACCCAGGUGGCC  
>P48  
UGGUUUUCACCCAGGCGGCCCGGGUUCGACUCCCGGUGUGG  
>P49  
CCGCGCGAGGUCAGACUGGGCAGGAGAUGCCGUGGACCCCG  
>P50  
UAAGAGUAUCUGUAUCGCGGCUCGUUGGUCUAGGGGUAUGA  
>P51  
AUUUGUGGACAUCUAGGUUGCUGGUUCGAUCCGGCUCG  
>P52  
GUAGAGCGGAGGACUGUAGCUGUAGAAACAUUUGUGGACA  
>P53  
CAGUGUGCAUCCUUCGAUAGCUCAGCUGGUAGAGCGGAGGA  
>P54  
UGACUACGGAUCAGAAGAUUCAGGUUCGACUCCUGGCUGG

>P55  
GGGAUCGCGCCUGUGAAUAGCCACUGCACUCCAGCCUGGGC  
>P56  
CUGGGCAACAUAGCGAGACC CGUCUCUUUGAACAAUAAA  
>P57  
GGUGC AAAUAACGCCAAGGU CGCGGGUUCGAUCCCCGUACG  
>P58  
AACGGUUACUUGUCAUCUCC ACAUGGUCUAGCGGUUAGGA  
>P59  
GGUUCGAAUCCGAGUCACGG CAUUGUGGGAACAAUGGCACG  
>P60  
GUAUAGUGGUUAGUACUCUG CGUUGUGGCCGCAGCAACCUC  
>P61  
GGACUCUGAAUCCAGCGAUC CGAGUUCAAAUCUCGGUGGAA  
>P62  
CCGAGGCCGCCAGAGCCCU CCGGGGAGACCCGAGGCCGC  
>P63  
CAGUCGGUAGAGCAUGAGAC CUUAAUCUCAGGGUCGUGGG  
>P64  
AACAUAUUGCAGCUGGGUAG CGUGGCCGAGCGGUCUAAGGC  
>P65  
GGCCCGGUUCGAUCCCCGG CAAUGCAGCAGCUGAAAGCU  
>P66  
AUUCUCGCCUGCCAUGC GGG CGGCCGGGCUUCGAUCCUGG  
>P67  
UGUCUAGUAAACAGGAGAUC CUGGGUUCGAAUCCAGCGGU  
>P68  
UGGUAUAGUGGUAAGCAUAG CUGCCUCCAAGCAGUUGACC  
>P69  
GACUCCAGAUCAGAAGGUUG CGUGUUCAAGUCACGUCGGGG  
>P70  
CUUAAGAAGCCAGCAGGUCC CAUGGUGUAAUGGUUAGCACU  
>P71  
UCCCAUGGUGUAAUGGUUAG CACUCUGGACUUUGAAUCCAG  
>P72  
AAUCCCAGCGGUGCCUCAAC CGAGCGUCCAAGCUCUUUCCA  
>P73  
AUUCUCAAAACUUUAAAUGGG CAAGAAGCCCAGCUAGCUCAG  
>P74  
CAGUGCGAGCGGAGCAAUGC CGAGGUUGUGAGUUCGAUCCU  
>P75  
GGUCACGACCUCAGGCUUU CAAUCUGAGGGUCCAGGGUUC  
>P76  
AGGCUUUCAAUCUGAGGGUC CAGGGUUCAUAUCCUGUUCA  
>P77  
CUCUUCGAAUGCACUUGC GG CCGGGUCCUCCAGGGCUA  
>P78  
GUGGUCUAGUGGUUAGGAUU CAGUGCUCUCUCAUAAAAUAA

>P79  
AGCACUCUGGACUCUGAAUC**C**AGCGAUCUGAGUCACGGCAC  
>P80  
AAGCGGUUACCUCCUCAUGC**C**GGACUUUCUAUCUGUCCAUC  
>P81  
AGUUCUUUAAUUGAAACAAG**C**AACCUGUCUGGGUUGUUCGA  
>P82  
AGCAACCUGUCUGGGUUGUU**C**GAGACCCGCGGGCGCUCUCC  
>P83  
AACCUCUGGGCUGGCUUUAG**C**UCAGCGGUACUUCGCGUGU  
>P84  
CUUUAGCUCAGCGGUACUU**C**GCGUGUCAUCAAACCACCUC  
>P85  
AGUGGUUAUCACGUUCGCCU**C**ACACGCGAAAGGUCCCCGGU  
>P86  
GAUGUAGCUCAGUGGUAGAG**C**GCAUGC UUUGCAUGUAUGAG  
>P87  
AGUUAGAAUACAGACAUGGC**C**GCCCGGCUAGCUCAGUCGGU  
>P88  
AGGACUGUAGGCUCAUUAAG**C**AAGGUAUCCUUAGGUCGCUG  
>P89  
AGCAAGCCCUCUUAGCGCAG**C**UGGCAGCGGUCAGUCUCAU  
>P90  
AGUCUCAUAAUCUGAAGGUC**C**UGAGUUCAAGCCUCAGAGAG  
>P91  
UCGCGGGUUCGAUCCCCGUA**C**UGGCCAGACGUGACUUUUUA  
>P92  
AGAAGAUUCUAGGUUCGACU**C**CUGGCUGGCUCGGGUGUUAA  
>P93  
AGGAAAUGCUAGUUCAGCUU**C**AGGUUCCAUGGUGUAAUGGU  
>P94  
AAUCCAUUGUGCUCUGCACG**C**GUGGGUUCGAAUCCACCUU  
>P95  
CAGACUCAAGUUGCUCUUC**C**CAGGUUUGGGGCUUCUGGUC  
>P96  
GUGGUCUAAGGCGCCAGACU**C**AAGUUGCUCUUC**C**CAGGUU  
>P97  
ACUGCUUCCUGUGUUCGGGU**C**UUCUGGUCUCCGUAUGGAGG  
>P98  
AAAGGUCCCUGGAUCAAAAC**C**AGGCGGAAACAAGUGGUUAC  
>P99  
UCAAUUCUCACUCCACCAG**C**AGGGUUGUUUCCGUAGUGUA  
>P100  
GUUAGCUCAGUCGGCUAGAG**C**GUGGUGC UAAUAACGCCAAG  
>P101  
AUCCUGGGUUCGAAUCCAG**C**GGGGCCUUGAUUUCUGUACC  
>P102  
UGGCUUAGCUGGUUAAAGCG**C**CUGUCUAGUAAACAGGAGAU



>P103  
 GGAUGGCCGAGUGGUUAAGGCGUUGGACUUAAGAUCCAAUG  
 >P104  
 AAAAGAAGAAGCUUUGUAACCGUUGGUUUCGUGAGUGUAGU  
 >P105  
 CCCAGCGGGGCCUUGGUUGGCAAGGUCAGUGUGCCUUUCUG  
 >P106  
 AAGCCAACAGAACUCUCAUGCGGUCAGGGGGUGUAGCUCAG  
 >P107  
 UGAGGCCCGGGUUCGAUCCCGGCACCUCCAAAUGGUGGU  
 >P108  
 ACCUCCAAGUGAUGGUUUCUCUGGCAGUUCUCAAGCGAC  
 >P109  
 CGAUCCCCGACACCUCCAAGCGAUGGUUUUGCUCUGGUAGU  
 >P110  
 CAAUCCCCGGCACCUCCAUUCUUUUGCUUUUAAUUUUUUU  
 >P111  
 UGUCCCAGGUGUCAGGAUGGCGAGUGGUCUAAGGCGCCAG  
 >P112  
 UGAAGGUCCUGAGUUCGAACUCAGAGGGGGCAAGGCGUCU  
 >P113  
 GAACGCGCCCGAUCUGGUCUCAUCUCGGAAGCUAAGCAGGG  
 >P114  
 GUCAGUUACAGAUCCAACUCUUGUUCUACUCUUUCCCCC  
 >P115  
 AUUACACUGUCCUCCUAUGAUGGGUGUAUGGCUCAGGGGU  
 >P116  
 AGGGGACGCCGACACACGUACACGUCCCUUCGAUAGCUCAG  
 >P117  
 UUAGGUCGCUGGUUCGAUUCGGCUCGAAGGAGAGACACCC  
 >P118  
 UAUGUAUACAUGUGCCAUGC CGAUCUCGUCUGAUCUCGGA  
 >P119  
 AAAACUAAAACUUACAGUCAGAGGUUCAAUUCCUCUUCU  
 >P120  
 AGAACUGCUAACUCAUGCCC CAUGUCUAACAACAUGGCUU

**II. Negative subset  $\mathbb{S}_{\xi=20}^- (m^5C)$**

>N1  
 GGGAGUGGGAACAGGAUUUGCAAGACUCCUAGUACCUAAAU  
 >N2  
 GAAAUGGCCUCAUUUGAUAAUCUAGUAGGUUUUACACAGUGU  
 >N3  
 GGGCAGCCUCCUUCUUGUCUCUGUUGUUGAGGAGUGGAAUG  
 >N4  
 UCUUCAGGGUUUUCUAGGACCAAGGUGACAUUUCUACGAGG  
 >N5

AAGAGAUAGGCUCUCACCUGCCUAAGGGCAGCAUCUUGUUU  
>N6  
CGUGGAAAGGGAUUCAGAGACAGAGUCAAGAGAUGAUAGCA  
>N7  
GGUGGUUCUAGUGAAGGCAGCAGCAAAGGGGGUAGAGGAGC  
>N8  
GAUAAAUGCUGGGCCCAGGGCUGGGCAUAGCCUGCUGCACU  
>N9  
CACUGGGUGUGCUGUAACAGCAAGGUUCAUCUGACUAUGUU  
>N10  
GAAACAUUACCCCUCUUUCCGCACCAACGAUCUGCUUGU  
>N11  
CUUUCUAGGGAAUAAGAUACUGUUUUUACACAGGCAAAGG  
>N12  
AAACCUUCUGUGGGACAGGCCCUCCACCCAAGGCCCUUUA  
>N13  
AAUAAAAAAGAUCAAAGAGCUAAUAAGUGGUGGUCAGCAU  
>N14  
CUGUCCUACUACUGCCCCCCCCTCAUCGUAUCAUAGAAAA  
>N15  
AAUAAGAAAAGGUGUCAGAUUGAUGGUGGAUAAAUAAGU  
>N16  
AUCAGAAGCUGAAAUCACACCACAAGUAUCCCACUAGCUCC  
>N17  
UUAUUUAUAAAAAGUAAUUGUUACUGGUGCUUGAUUACA  
>N18  
UUUGCAGAAGCAAGCUCAGUCUCCUGAGAGUUCACGCUGAG  
>N19  
CCAUCAGACGAGAGAGCUUACUAAUUAGAGAGCCUUCUGCU  
>N20  
CCUGCCAGGAUGUGCUACCAAGGCUGUGCUCAACUGAACA  
>N21  
GCAGACACUGCCAAAGGCAGCUGGAGCCCUACUAAGUGGAA  
>N22  
CAUUGGUGCCUCAGACGUAAACAGUCUGUGGGAAGUAUGAA  
>N23  
GCAACAUUCCCUGCUGGAGGCUCCAGGAUCCUAAGGGACAC  
>N24  
ACCUGAUCGAUAGGGAGGAAACACAUCAACCCUACCCCA  
>N25  
GGUCCCGGAGAUUCCUUGUCAGCCACCCUACCCUACUUGA  
>N26  
UGCCCACAUGUGCACGCACACACACUCAUACCCGAACACAC  
>N27  
UAUUGAAAUUCUAUCUCACCUCUAGUCAGAAUGGCAAUCAUU  
>N28  
GCAGAGAAGGGAGCCACGCACACUGUGGGUUGGAAUGUAAA  
>N29

UUUGCUCUGACACCACGAUCCACUGCAUCCCUCCUAAAAC  
>N30  
UCUAAGCCAAAUGAGCCCCAACCUCUUUAAGUAGAUUCUU  
>N31  
CAAGGUGAUCUAACAGAAUUCAUAAAGGGAGAAAGUCAGGGU  
>N32  
AGGUAUAGCUCUUUCUCUGCUUGUGACUCCUGGCUC  
>N33  
UGCCACAUGAACACGUAUGCCAAUGGACUCUGCUCCCGUGU  
>N34  
UGCAGAGAAAUGGAUUAAAUCUAGCUUGGUGUGGAUCACUU  
>N35  
UGUUUAUUCAUUUGGCUAUUCCAUUGUCCUGUACCAUCAA  
>N36  
UCUUUCUCAGUUUGUUGGAGCAUCUCAGCCAGACAAGACGC  
>N37  
CUGUCCAAAGUGUUCUAUUCUUUAACACAUCAACGUUGUU  
>N38  
AUUGAUCUUUUUAUGCCAUUCUAACUAAGUCAGAGCAGACU  
>N39  
AUUCAGGAGGUCUCAGAACAAGGCACAAAUGAACAUGUUC  
>N40  
UUUUUAAGGCUUUAUUGUCUCUAAGACCUGCAACCAAAAA  
>N41  
GCUUGGGGAGGUGAUUGUGUCACAAGGGCAGAGUUGUAGAG  
>N42  
CAUUUGGAGAAUAAAAGUUAUUAUUACAAAGAGUCUUCAUG  
>N43  
CUUUCUCACUUCUAUAGCUACAAGAAGUAAGCUUCUGUGAU  
>N44  
UCACAGCUGUAACCCCCCCCCCAAGUACUAGGAUCAGUU  
>N45  
GGUCCUAGUCUUAAAUUGUGCUUUCUGCAUUUGUCACAGAA  
>N46  
AUCACUAGCAUCCCCUUCUCUGGGGCAUCAAGCCUCCACA  
>N47  
GGACCAAGUGCAUUCUCCUCCAAUGAGGCCAGAAAAGGCAA  
>N48  
AAACAGACUUUUUUUAUAGCCAAGUUUUUUUUUUUUUUUU  
>N49  
CUUCUAUCUUUCCUUUGCCUCAGAUUAUCAUCUUGGUUUGA  
>N50  
UACAUUUUUUUCUGACUAGCUGCAUGACCACUUUGCUUGU  
>N51  
GAUUAUGGUUUACCACUCCUCAUCUCCUCCAGAUUCUCCC  
>N52  
CAUCUCCUCCUGUCCAACUCAUGCCUUAUAUGGUCUCUC  
>N53

CAGACACAUAUUUACACAUAACACACACACACACUUUAUUUU  
>N54  
AUAUUCACAAAACUAGAAAACAUGAUUAAGAGCAAACGU  
>N55  
CCAGUAAGGUAAAAAAUACCCAAAGAAAGCAAUGUCAAUCA  
>N56  
UGUAAGUGGCUGCACAACUUCACUCUUUUUCUGAUUUUAUC  
>N57  
AAUGAGGUUUGACUUGAUUCUAUUUUAGGUGCUUGUUUG  
>N58  
UUACAUGCAUUGCAGAUUUACUGGGUAGCUUGAAUGUAAGC  
>N59  
CUUGAGCAAAAUUUAUAGAUCCUUGAAGUUGCAAAGUAGAC  
>N60  
AUCGGUCCUCAUUCGCUAACUAUAGUUUUUUCCUAAAAG  
>N61  
AGACAAGAACUCCUGUUGAUCCAUAUAUGUGCCAAACCUCA  
>N62  
GAGCUGUCAAGGGCACACAUCUGAGAUACAUGAAUGCUGAG  
>N63  
UAAGACAACAACAGAGUCUUCUUAGCGCAUCUUUGUGGUUU  
>N64  
UGUCAGAAGAAUACCAUGCCCAUUUCUCAUUUGUCAUUUC  
>N65  
CUCUUAUGACUACUAUUUCAUCUCUCUUCUAUGAGGUCAAUU  
>N66  
CUUAUCAAAAGUCUAAAGUUAUUUGGUAUUUGUAUUUCUUGG  
>N67  
AUAAUUGGAAGAUUAUGAAAACUUUGUCAACCCACUAAA  
>N68  
AUGACAAUGUCCUCCUAUUUCUGUGUUUAUACCGCUUGAAG  
>N69  
GGCUUGUGAGUCUUUGGGGGCAUUUUCUAAUUAUUGGGAGU  
>N70  
CGAGGGAGACUUACCUCUUCACAGGGCACUCAUAAGGUGUU  
>N71  
GCCUUUACGUCAGUACCAGCCAUGUGGAAUGCUCUACAGGU  
>N72  
ACCUCGAGGAAGGGGCACAAACUUGGAACUGUUUGCCAUA  
>N73  
GGAACACAGGUCCAAGGCUGUGUUUCAUUCACAAUUAUUC  
>N74  
GGAAACACCCUUCUUCAGUACCCACCCUAGAAUGAACAAGA  
>N75  
AUAGAGUUAUGCAAAAUUUUCUCUUGGAAUAUUCUUUUCUU  
>N76  
UAGUGACAAUAGGCACAGAACAGUGGCAGCAGAGAAACAGU  
>N77

AUGUUAAGGACUGAAGAAUUCUGACAUUCAUGUGUUCUGU  
>N78  
CUUGAAGUGGAAACUUAAGCUUCUGUGGAAAAGGUGUUGG  
>N79  
GAAUAUUUCACUGAAGCAGACACAGGAAAAAGAAUGUUCUG  
>N80  
AAAAACUUCUGGUGGUGUGCUGUGGCUUCUUGCUGCUUCU  
>N81  
UAUAAAAAGAACUCAACAGACAGUGGGAAGCAGAGCUUGGC  
>N82  
CUCCAAAGAAUCCUUCUAAAAGGUCCAGUUCACCAUAUC  
>N83  
AGAGUAAAGCGGCAUUAUUAGGCACUACAACCUCCAAC  
>N84  
AAACAAUGAUAGCAUGUAUUCUCAAGGACACAGUGAUUUUU  
>N85  
UUAAAUAACAUGCUUGAGUCUGAGGUAAGAGAGGGCCUCC  
>N86  
UUACUCUGAGAGUCCACUUUCAAAGCUUAGACAGCAAU  
>N87  
GCACAGACUGUCUCUCCUGUCACAGGUAUGUAUGUUCAUGU  
>N88  
GGAUCAUGAGUUACCUCUUUCUUUCUCUCUCUGCAAGGCUA  
>N89  
AGAGCUUCUCUCAAUUCUUCCCCUCUCCCAUAGCUAUUUC  
>N90  
AUUUUUUCUAAUACUUCAUCAACUCUCAAGGAGAUGGC  
>N91  
UUGCAUUUUCUCCCAUGUUAACCUUUGAAAACACCUGUAGGU  
>N92  
GUCUAAAGCCAUACCAUCUACACAAACAUGUAGAAGUUUGA  
>N93  
GAUCCAGGGGGCAUCCCAUCGUGCACACAGCCUCCCGAG  
>N94  
CCAUGUCCUCUAUUCCAUAGCCUGAAAACACAGCCAGUAGG  
>N95  
UUUGAAAUCCUUGUUCAUUCUUCUAUAAUCAGUCUGGCAC  
>N96  
CUCAUGUACAUGGCGUAUUUCAGUUUUGUCACAAAUAUUGA  
>N97  
CUACUUAUAUAUGUAAGAGUCACGUAAUUGAGGAUGGUAAU  
>N98  
UGUGAGGCCAGAGAAAAGGACCUUAGGCAUCAUUUCACAGG  
>N99  
CAGCAAGCAGCCAUCUCUCUCUCUCUCUCUCUCUCUCUCUC  
>N100  
CAAAAAGAACAUAUAAACCGAUUUACACUAUAUAUAUAU  
>N101

UCUCUUGGCAAUCCUCCUACCCUAGCUGCCAAGUAUUUGAC  
>N102  
UUUAACUAAUAUACUGGAAACAUA AAAAUUUUAUUAUACC  
>N103  
GCACUUCUUAAUCUCUUUUUGCCUUAUUGGUUGAUUAGG  
>N104  
AUUUCUCACUGAAUCAAGCCCUUACUGGUUGGUUACAAUGG  
>N105  
CCCAAUGCUGACAUAACAUGCUUAUGCUGUCUCCUUGGAA  
>N106  
UAGCACAGUAGUGUCAUCUGCAGCCAACUUGCUAUUAACCC  
>N107  
UGCACCUGAACUUGUUGCUCUUUUAAACAGCAACAGUGCCC  
>N108  
CAGCAGUGUCCAGUGCAUUCAUUGCCCCAUGAGCAGCAUC  
>N109  
UGGAUACAGAUGUCCUUUGCCUUACAGAAGCUUUGCAAUUU  
>N110  
AAGAAAGAAAUUCACUUGGACUUGAGCUUUGUACAAGGACA  
>N111  
GUAGGUGUGGGUUCAUUUCUGGGUCUUCAAUUCUAUUUA  
>N112  
GGAUAUCAGUCUGGCAGUUCUCAGAAAAUUGGACACGAGG  
>N113  
UUGCAGCCCCAUAGGAGGAGCAACAAUAUAAACCAACCAGU  
>N114  
ACACAUGAAGGGACUCAUGUCUCCAGCUGCAUAUGUAGCAG  
>N115  
AGGGUGGCCAUGUCAGUCAUCAUUGGGAGGAGAGGCCCUUG  
>N116  
GUCCUGUGAAGGUUCUGUGCCUCAGUGUAGGAGAAUGCCAU  
>N117  
ACAAAUGAAGAAUGAGCCAUCUUUAUACACAGACUCAGUCUU  
>N118  
AGCAGAUCAUUACUGAAUAAACUAGGAGAAGGCACUUGAA  
>N119  
GAUUCUUUCCUUAAGA UUGCUUUAAUUUUAAUUAUUUGUA  
>N120  
ACUCAGGUCUCCUUUGAGAGCAGAACUCAGUCUUAUGUGCU
