# Supplementary material for: iRNA-PseColl: Identifying the Occurrence Sites of Different RNA Modifications by Incorporating Collective Effects of Nucleotides into PseKNC
Source: PubMed Central journal article supplement — Mol Ther Nucleic Acids. 2017 Mar 29;7:155–63. doi: 10.1016/j.omtn.2017.03.006 (PMC5415964; doi:10.1016/j.omtn.2017.03.006), 2017-03-29
Supplement: mmc2.pdf [file mmc2.pdf]

# iRNA-PseColl: Identifying the Occurrence Sites of Different RNA Modifications by Incorporating Collective Effects of Nucleotides into PseKNC

Pengmian Feng,<sup>1</sup> Hui Ding,<sup>2</sup> Hui Yang,<sup>2</sup> Wei Chen,<sup>3,4</sup> Hao Lin,<sup>2,4</sup> and Kuo-Chen Chou<sup>2,4</sup>

<sup>1</sup>Hebei Province Key Laboratory of Occupational Health and Safety for Coal Industry, School of Public Health, North China University of Science and Technology, Tangshan, 063000, China; <sup>2</sup>Key Laboratory for Neuro-Information of Ministry of Education, School of Life Science and Technology, Center for Informational Biology, University of Electronic Science and Technology of China, Chengdu, 610054, China; <sup>3</sup>Department of Physics, School of Sciences, and Center for Genomics and Computational Biology, North China University of Science and Technology, Tangshan 063000, China; <sup>4</sup>Gordon Life Science Institute, Boston, MA 02478, USA

**There are many different types of RNA modifications, which are essential for numerous biological processes. Knowledge about the occurrence sites of RNA modifications in its sequence is a key for in-depth understanding of their biological functions and mechanism. Unfortunately, it is both time-consuming and laborious to determine these sites purely by experiments alone. Although some computational methods were developed in this regard, each one could only be used to deal with some type of modification individually. To our knowledge, no method has thus far been developed that can identify the occurrence sites for several different types of RNA modifications with one seamless package or platform. To address such a challenge, a novel platform called “iRNA-PseColl” has been developed. It was formed by incorporating both the individual and collective features of the sequence elements into the general pseudo K-tuple nucleotide composition (PseKNC) of RNA via the chemico-physical properties and density distribution of its constituent nucleotides. Rigorous cross-validations have indicated that the anticipated success rates achieved by the proposed platform are quite high. To maximize the convenience for most experimental biologists, the platform’s web-server has been provided at <http://lin.uestc.edu.cn/server/iRNA-PseColl> along with a step-by-step user guide that will allow users to easily achieve their desired results without the need to go through the mathematical details involved in this paper.**

## INTRODUCTION

Since the first modified RNA ribonucleic acid was found ~60 years ago,<sup>1</sup> ~150 known RNA modifications have been reported.<sup>2</sup> Emerging evidences suggest that RNA modifications are critical components of the gene regulatory landscape and are involved in a variety of biological processes in the post-transcriptional level, such as protein translation and localization,<sup>3</sup> mRNA splicing,<sup>4</sup> affecting ribosome biogenesis,<sup>5</sup> mediating antibiotic resistance,<sup>6</sup> and stem cell pluripotency.<sup>7</sup> However, many aspects of RNA modifications remain unknown.<sup>8</sup> Therefore, detecting the positions of RNA modifications plays an essential role for understanding their molecular mechanisms and functions.

The advent of next-generation sequencing technologies has allowed investigation of RNA modifications on a genome-wide scale.<sup>9–15</sup> For example, the *N*<sup>1</sup>-methyladenosine (m<sup>1</sup>A),<sup>9, 10</sup> *N*<sup>6</sup>-methyladenosine (m<sup>6</sup>A),<sup>13</sup> and 5-methylcytosine (m<sup>5</sup>C)<sup>15</sup> maps are available for the human transcriptome. Although these experimental methods played active roles in promoting the research progress on understanding the biological functions and the identification of RNA modifications, they are still labor-intensive. As excellent complements to experimental techniques, some computational methods (based on the high-resolution experimental data) have been developed to identify RNA modifications.<sup>7, 16–21</sup>

Reminiscent of the regulation of gene expression by histone modifications, it is also possible to mediate biological functions in a collective way by combining different kinds of RNA modifications.<sup>8</sup> Unfortunately, to the best of our knowledge, no computational tool is available for dealing with a system that simultaneously contains several different kinds of RNA modifications. Actually, this kind of multi-modification systems may contain much more interesting things worthy of exploration.

In view of this, the present study was initiated in an attempt to fill such a void by establishing a seamless package or platform that can be used to analyze a biological system that simultaneously contains the three well known types of RNA modifications: m<sup>1</sup>A, m<sup>6</sup>A, and m<sup>5</sup>C (Figure 1).

Received 12 February 2017; accepted 17 March 2017;

<http://dx.doi.org/10.1016/j.omtn.2017.03.006>.

**Correspondence:** Wei Chen, Department of Physics, School of Sciences, and Center for Genomics and Computational Biology, North China University of Science and Technology, Tangshan 063000, China.

**E-mail:** [chenweiimu@gmail.com](mailto:chenweiimu@gmail.com)

**Correspondence:** Hao Lin, Key Laboratory for Neuro-Information of Ministry of Education, School of Life Science and Technology, Center for Informational Biology, University of Electronic Science and Technology of China, Chengdu 610054, China.

**E-mail:** [hlin@uestc.edu.cn](mailto:hlin@uestc.edu.cn)

**Correspondence:** Kuo-Chen Chou, Gordon Life Science Institute, Boston, MA 02478, USA.

**E-mail:** [kcchou@gordonlifescience.org](mailto:kcchou@gordonlifescience.org)

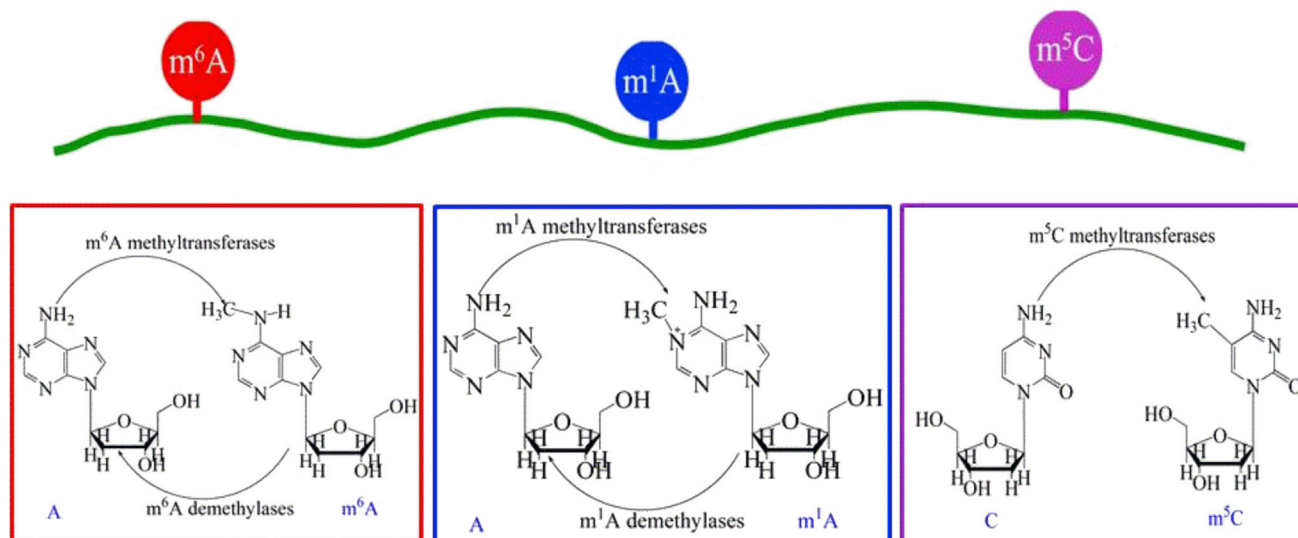

**Figure 1. A Schematic Drawing to Show the Three Types of Modifications that May Simultaneously Occur in an RNA Sequence**

Three types of modifications ( $m^1A$ ,  $m^6A$ , and  $m^5C$ ) are shown.

## RESULTS AND DISCUSSION

By incorporating collective effects of nucleotides into PseKNC,<sup>22, 23</sup> a seamless platform called “iRNA-PseColl” has been developed for identifying the occurrence sites of different RNA modifications.

It has been observed by the most rigorous cross-validation, the jack-knife test,<sup>24</sup> that the success rates achieved by the new predictor are quite high for the three different types of RNA modification sites, respectively (Table 1).

Because it is the first platform predictor ever developed for simultaneously identifying three different types of RNA modification sites based on its sequence information alone, it is not possible to demonstrate its power by a comparison with its counterparts because there is no such a counterpart yet for exactly the same purpose. Nevertheless, as we can see from Table 1, all the scores are quite high, particularly for the overall accuracy (Acc) and Mathew’s correlation coefficient (MCC).

Let us use graphic analysis to further demonstrate the proposed platform’s quality. As it is, the graphical approach is a useful vehicle for studying complicated biological systems because it can provide intuitive insights, as demonstrated by a series of previous studies.<sup>25–34</sup> Therefore, it would be instructive and illuminative to give an intuitive illustration for the current study as well. To realize this, the graph of receiver operating characteristic (ROC)<sup>35, 36</sup> was adopted as shown in Figure 2, where the ROC curves for the current method in identifying  $m^1A$ ,  $m^6A$ , and  $m^5C$  modifications were given, respectively. The best possible prediction method would yield a point with the coordinate (0, 1) representing 100% sensitivity and 0 false-positive rate or 100% specificity. Therefore, the (0, 1) point is also called a perfect classification. A completely random guess would give a point along a

diagonal from the point (0, 0) to (1, 1). The area under the ROC curve, also called AUROC, is used to indicate the performance quality of the classifier: the value 0.5 of AUROC is equivalent to random prediction while 1 of AUROC represents a perfect one. The AUROC for the case of  $m^1A$ ,  $m^6A$ , or  $m^5C$  is 0.998, 0.849, or 0.911, respectively, indicating that the proposed platform is quite promising, holding very high potential to become a useful high throughput tool for genome analyses.

Inspired by a series of recent publications,<sup>20, 21, 37–53</sup> papers published with a publicly accessible web server will significantly enhance their impacts; this is particularly true for those papers aimed at developing novel prediction methods.<sup>54</sup> Accordingly, the web server for the current platform has been established. Moreover, for the convenience of the scientific community, a user guide is given in the [Supplemental Materials and Methods](#).

## MATERIALS AND METHODS

According to the Chou’s<sup>55</sup> five-step guidelines that have been followed by many investigators in a series of recent publications,<sup>21, 39, 41, 43–52, 56–63</sup> to develop a new prediction method that not only can be easily used by most experimental scientists but also can inspire theoretical scientists to develop many other relevant prediction methods, we should make the following five procedures very clear: (1) how to construct or select a valid benchmark dataset to train and test the prediction model, (2) how to represent a biological sequence sample with a mathematical formulation or vector that is really correlated with the target concerned, (3) how to introduce or develop a powerful engine (or algorithm) to run the prediction model, (4) how to properly perform the cross-validation tests to objectively evaluate the anticipated accuracy, and (5) how to design a user-friendly web server to make it easy for people to get their desired

**Table 1. The Success Rates Obtained by the Proposed Model in Identifying Three Different Types of RNA Modification Sites**

| Modification Type    | Metrics <sup>a</sup> |        |         |      |
|----------------------|----------------------|--------|---------|------|
|                      | Sn (%)               | Sp (%) | Acc (%) | MCC  |
| (1) m <sup>1</sup> A | 98.38                | 99.89  | 99.13   | 0.98 |
| (2) m <sup>6</sup> A | 81.86                | 99.11  | 90.38   | 0.82 |
| (3) m <sup>5</sup> C | 75.83                | 79.17  | 77.50   | 0.55 |

The results were obtained by the jackknife tests on the three benchmark datasets given in [Supplemental Materials and Methods](#), respectively. Acc, overall accuracy; MCC, Mathew's correlation coefficient; Sn, sensitivity; Sp, specificity.  
<sup>a</sup>See [Equation 13](#) and the relevant text for the definition of metrics.

results. Below, we elaborate the five procedures in establishing the new predictor.

### Benchmark Dataset

Owing to the fast development of high-throughput experimental techniques, the experimentally confirmed m<sup>1</sup>A, m<sup>6</sup>A, and m<sup>5</sup>C modification data is available for the human genome.<sup>9, 10, 13, 15</sup> By mapping the experimental data to the human genome, the sequence samples with statistical significance were obtained for the three kinds of RNA modification sites as well. For facilitating the formulation, let us use the following scheme to represent a potential RNA modification-site-containing sample

$$R_{\xi}(\otimes) = N_{-\xi}N_{-(\xi-1)} \cdots N_{-2}N_{-1} \otimes N_{+1}N_{+2} \cdots N_{+(\xi-1)}N_{+\xi}, \quad (\text{Equation 1})$$

where the symbol  $\otimes$  denotes the single nucleic acid code A (adenine) or C (cytosine), the subscript  $\xi$  is an integer,  $N_{-\xi}$  represents the  $\xi$ -th upstream nucleotide from the center, the  $N_{+\xi}$  represents the  $\xi$ -th downstream nucleotide, and so forth. The  $(2\xi + 1)$ -tuple RNA sample,  $R_{\xi}(\otimes)$ , can be further classified into the following two categories:

$$R_{\xi}(\otimes) \in \begin{cases} R_{\xi}^{+}(\otimes), & \text{if its center can be of 2'-O-methylation} \\ R_{\xi}^{-}(\otimes), & \text{otherwise} \end{cases}, \quad (\text{Equation 2})$$

where  $R_{\xi}^{+}(\otimes)$  denotes a true modification segment with A or C at its center,  $R_{\xi}^{-}(\otimes)$  denotes a false modification segment with A or C at its center, and the symbol  $\in$  means "a member of" in the set theory.

In literature, the benchmark dataset usually consists of a training dataset and a testing dataset: the former is for the use of training a model, while the latter for testing the model. However, as elucidated in a comprehensive review,<sup>64</sup> there is no need to artificially separate a benchmark dataset into the aforementioned two parts if the prediction model is examined by the jackknife test or subsampling (K-fold) cross-validation, because the outcome thus obtained is actually from a combination of many different independent dataset tests.

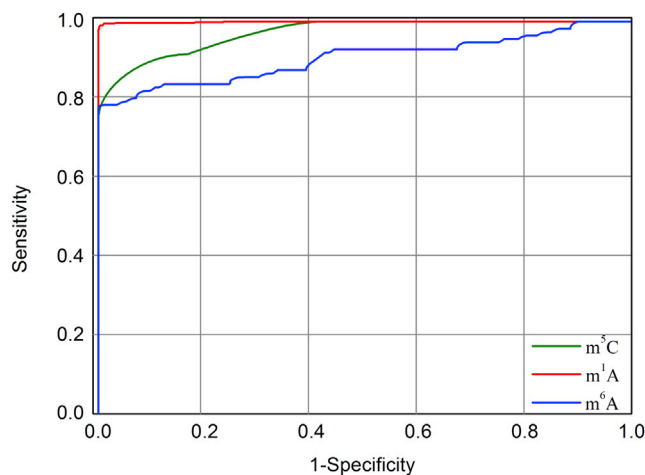

**Figure 2. A Graphical Illustration to Show the Performances of iRNA-PseColl in Identifying m<sup>1</sup>A, m<sup>6</sup>A, and m<sup>5</sup>C Modification Sites, Respectively**  
 The performances are illustrated by means of the ROC curves.<sup>35, 36</sup> The area under the ROC curve is called AUROC. The greater the AUROC value is, the better the performance will be. See the text for further explanation.

Thus, the benchmark datasets for the current study can be further formulated as

$$\begin{cases} S_{\xi}(m^1A) = S_{\xi}^{+}(m^1A) \cup S_{\xi}^{-}(m^1A), & \text{when } \otimes = A \\ S_{\xi}(m^6A) = S_{\xi}^{+}(m^6A) \cup S_{\xi}^{-}(m^6A), & \text{when } \otimes = A, \\ S_{\xi}(m^5C) = S_{\xi}^{+}(m^5C) \cup S_{\xi}^{-}(m^5C), & \text{when } \otimes = C \end{cases}, \quad (\text{Equation 3})$$

where the positive subset  $S_{\xi}^{+}(m^1A)$  only contains those RNA samples that can have m<sup>1</sup>A modification, and the negative subset  $S_{\xi}^{-}(m^1A)$  only contains those RNA samples that cannot have m<sup>1</sup>A modification, while U denotes the symbol of "union" in the set theory,<sup>64</sup> and so forth.

The benchmark datasets were derived from the RNA sequences in human genome that have the experimentally confirmed m<sup>1</sup>A, m<sup>6</sup>A, and m<sup>5</sup>C modification sites.<sup>9, 10, 13, 15</sup> The detailed procedures to construct the benchmark dataset are as follows. First, as done in Chou,<sup>65</sup> by sliding the  $(2\xi + 1)$ -tuple nucleotide window ([Figure 3](#)) along each of the aforementioned RNA sequences, only those RNA segments with  $\otimes = A$  or C at the center were collected. Second, if the upstream or downstream in a RNA sequence was less than  $\xi$  or greater than  $L - \xi$  where  $L$  is the length of the RNA sequence concerned, the lacking code was filled with the same code of its nearest neighbor. Third, the RNA segment samples thus obtained were put into the positive subset  $S_{\xi}^{+}(m^1A)$ ,  $S_{\xi}^{+}(m^6A)$ , or  $S_{\xi}^{+}(m^5C)$  if their centers were experimentally annotated as the m<sup>1</sup>A, m<sup>6</sup>A, or m<sup>5</sup>C sites; otherwise, into the corresponding negative subset  $S_{\xi}^{-}(m^1A)$ ,  $S_{\xi}^{-}(m^6A)$ , or  $S_{\xi}^{-}(m^5C)$ . Fourth, to reduce redundancy and bias, none of the included RNA segments had pairwise sequence identity with any other in a same subset. By strictly following the above procedures, we obtained an array of benchmark datasets with

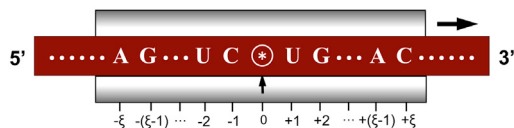

**Figure 3. An Illustration to Show the Process of Collecting the RNA Samples by Sliding the  $(2\xi + 1)$ -nt Scaled Window along an RNA Sequence**

Adapted from Chou<sup>65</sup> with permission. See the text for further explanation.

different  $\xi$  values and hence different lengths of RNA samples  $(2\xi + 1)$  as well (see Equation 1), as illustrated below

$$S_{\xi}(\otimes) \subset \begin{cases} 23 \text{ nucleotides, when } \xi = 11 \\ 25 \text{ nucleotides, when } \xi = 12 \\ 27 \text{ nucleotides, when } \xi = 13 \\ \vdots \\ 39 \text{ nucleotides, when } \xi = 19 \\ 41 \text{ nucleotides, when } \xi = 20 \\ 43 \text{ nucleotides, when } \xi = 21 \end{cases}, \quad (\text{Equation 4})$$

where the symbol  $\subset$  means “formed by.” It was observed via preliminary tests as well as many reports<sup>19, 43, 66</sup> that when  $\xi = 20$  (i.e., the RNA samples formed by 41 nucleotides [nt]), the corresponding results were most promising. Accordingly, hereafter we only consider the 41-nt RNA sequences. By doing so, we obtained 6,366, 1,130 and 120 sequence samples for the positive subsets  $S_{\xi}^{+}(m^1A)$ ,  $S_{\xi}^{+}(m^6A)$ , and  $S_{\xi}^{+}(m^5C)$ , respectively. The numbers of samples thus obtained in the corresponding negative subsets are much greater, and hence the benchmark datasets would be very imbalanced. Using such highly skewed benchmark dataset to train predictors would lead to the outcome that many positive cases might be mispredicted as negative ones.<sup>42, 44, 56, 67</sup> To balance out the size between the positive subset and the negative subset, we randomly picked out 6,366, 1,130, and 120 from the corresponding negative samples to form the negative subsets  $S_{\xi}^{-}(m^1A)$ ,  $S_{\xi}^{-}(m^6A)$ , and  $S_{\xi}^{-}(m^5C)$ , respectively, as done in Chen et al.<sup>16</sup> and Feng et al.<sup>19</sup>

Finally, the detailed RNA sequence samples thus obtained for the benchmark dataset  $S_{\xi=20}(m^1A)$ ,  $S_{\xi=20}(m^6A)$ , and  $S_{\xi=20}(m^5C)$  are given in the **Supplemental Materials and Methods**, which can also be directly downloaded from <http://lin.uestc.edu.cn/server/iRNA-PseColl/dataset.htm>.

### Formulating RNA Sequence Samples

One of the most challenging problems in computational biology today is how to formulate a biological sequence with a vector that can reflect its key pattern important for the function or mechanism concerned. The importance of such a challenge is due to the fact that nearly all the existing machine-learning algorithms were developed to handle vector rather than sequence samples, as elucidated in a review article.<sup>54</sup> Unfortunately, a vector defined in a discrete model may lose many important sequence pattern features. To deal with such a problem for protein/peptide sequences, the pseudo amino acid composition (PseAAC)<sup>68–72</sup> was developed. Ever since it was introduced, the concept of PseAAC has penetrated into nearly all the areas of computational proteomics

(see a long list of references cited in two review papers<sup>55, 73</sup>). Inspired by the concept of PseAAC and encouraged by its great successes, the pseudo nucleotide composition (PseKNC)<sup>22, 74–76</sup> was proposed and has been increasingly used in various fields of genome analysis.<sup>20, 21, 23, 37, 39, 40, 42, 43, 51–53, 58–60, 77–85</sup> With both PseAAC and PseKNC being increasingly and widely used, it is highly desired to design a seamless package that can generate various modes of PseAAC and PseKNC according to users’ needs for protein/peptide and DNA/RNA sequences, respectively. This was exactly the driving force of establishing the web server called Pse-in-One<sup>86</sup> and what it is about.

The general form of PseKNC for an RNA sequence sample is given by<sup>23</sup>

$$R = [\phi_1 \quad \phi_2 \quad \cdots \quad \phi_u \quad \cdots \quad \phi_{\Gamma}]^T, \quad (\text{Equation 5})$$

where T is a transpose operator, while the subscript  $\Gamma$  an integer and its value as well as the components  $\phi_u$  ( $u = 1, 2, \dots, \Gamma$ ) will depend on how to extract the desired features from the RNA sequence sample. In order to make Equation 4 able to reflect both the local feature of its individual constituent nucleotides and that of their collective effect, let us define the components in Equation 4 from the following two different approaches.

### Local Features of Individual Nucleotides

RNA consists of four types of nucleotides: A (adenosine), C (cytidine), G (guanosine), and U (uridine). They can be classified into three different categories (Table 1): (1) from the angle of ring number, A and G have two rings, whereas C and U only one; (2) from the chemical functionality, A and C belong to amino group, while G and U to keto group; and (3) from the angle of hydrogen bonding, C and G can be bonded to each other with three hydrogen bonds, but A and U with only two (Figure 4). All these properties would have different impacts to RNA’s low-frequency internal motion<sup>87, 88</sup> and its biological function<sup>89–91</sup>.

To reflect the aforementioned features, let us denote the  $i$ -th nucleotide of Equation 1 by<sup>92, 93</sup>

$$N_i = (x_i, y_i, z_i), \quad (\text{Equation 6})$$

where  $x_i$ ,  $y_i$ , and  $z_i$  refer to the attributes of (1) ring structure, (2) functional group, and (3) hydrogen bonding in Table 2, respectively. Accordingly, the nucleotide A can be formulated as (1, 1, 1), C as (0, 1, 0), G as (1, 0, 0), and U as (0, 0, 1); or generally we have

$$x_i = \begin{cases} 1, & \text{if } N_i \in \{A, G\} \\ 0, & \text{if } N_i \in \{C, U\} \end{cases}; \quad y_i = \begin{cases} 1, & \text{if } N_i \in \{A, C\} \\ 0, & \text{if } N_i \in \{G, U\} \end{cases}; \quad z_i = \begin{cases} 1, & \text{if } N_i \in \{A, U\} \\ 0, & \text{if } N_i \in \{C, G\} \end{cases}. \quad (\text{Equation 7})$$

### Collective Features of the Constituent Nucleotides

There are some methods to reflect the coupling of a biological sequence or the collective effect of its constituent elements, such as

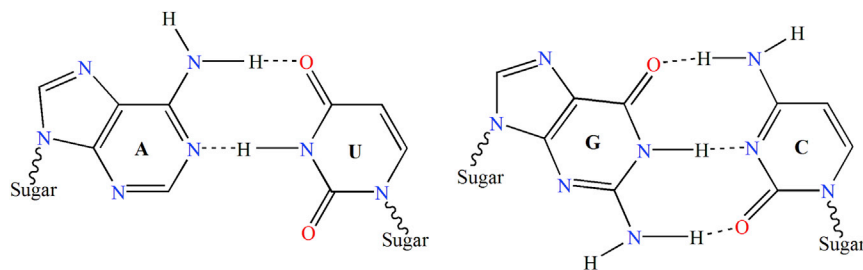

**Figure 4. Illustration to Show the Structure of Paired Nucleic Acid Residues**

Left: A-U pair bonded to each other with two hydrogen bonds. Right: G-C pair with three hydrogen bonds. Adapted from Chou<sup>87</sup> with permission.

the conditional probability approach,<sup>94</sup> degenerate Kmer strategy,<sup>40</sup> and g-gap dipeptide mode.<sup>41</sup> In this study, we would like to use a different approach; i.e., consider the occurrence frequency of a nucleotide not only for its local site but also for its distribution along the sequence of an RNA sample, as defined by the following equation

$$D_i = \frac{1}{\|L_i\|} \sum_{j=1}^{\ell} f(N_j), \quad (\text{Equation 8})$$

where  $D_i$  is the density of the nucleotide  $N_j$  at the site  $i$  of a RNA sequence,  $\|L_i\|$  the length of the sliding substring concerned,  $\ell$  denotes each of the site locations counted in the substring, and

$$f(N_j) = \begin{cases} 1, & \text{if } N_j = \text{the nucleotide concerned} \\ 0, & \text{otherwise} \end{cases}. \quad (\text{Equation 9})$$

For instance, suppose a RNA sequence is “CACGUC.” The density of “A” at the sequence position 1, 2, 3, 4, 5, or 6 is  $0 = 0/1$ ,  $0.5 = 1/2$ ,  $0.33 \approx 1/3$ ,  $0.25 = 1/4$ ,  $0.20 = 1/5$ , or  $0.16 = 1/6$ , respectively; that of “C” is  $1 = 1/1$ ,  $0 = 0/2$ ,  $0.66 \approx 2/3$ ,  $0.5 = 2/4$ ,  $0.4 = 2/5$  or  $0.5 = 3/6$ , respectively; and so forth.

By combing Equations 6 and 9, the  $i$ -th nucleotide of Equation 1 can be uniquely defined by a set of four variables; i.e.,

$$N_i = (x_i, y_i, z_i, D_i). \quad (\text{Equation 10})$$

For example, the RNA sequence “CACGUC” can be expressed by the following five sets of digital numbers: (0, 1, 0, 1), (1, 1, 1, 0.5), (0, 1, 0, 0.66), (1, 0, 0, 0.25), (0, 0, 1, 0.2), and (0, 1, 0, 0.5). Submitting these numbers into Equation 5, we have

$$R(\text{CACGUC}) = [0 \ 1 \ 0 \ 1 \ 1 \ 1 \ 1 \ 0.5 \ 0 \ 1 \ 0 \ 0.66 \ 1 \ 0 \ 0 \ 0.25 \ 0 \ 0 \ 1 \ 0.2 \ 0 \ 1 \ 0 \ 0.5]^T, \quad (\text{Equation 11})$$

meaning that the 6-nt nucleotide example can be defined by a  $6 \times 4 = 24$  -D (dimensional) PseKNC vector.

Accordingly, all the samples in the current benchmark datasets (Supplemental Materials and Methods) can be formulated with a  $41 \times 4 = 164$  -D vector.

### Operation Engine

The prediction was operated by SVM (support vector machine), which has been widely used in various areas of bioinformatics and computational biology.<sup>20, 40, 42, 59, 67, 77-81, 95-103</sup> Its basic idea has been elaborated in the aforementioned papers, and there is no need to repeat it here.

In the current study, the LibSVM package 3.18 was used to implement SVM, which can be downloaded for free from <http://www.csie.ntu.edu.tw/~cjlin/libsvm/>. The SVM algorithm contains two uncertain quantities: one is the regularization parameter  $C$  and the other is the kernel width parameter  $\gamma$ . They were optimized via an optimization procedure using the grid search approach as described by

$$\begin{cases} 2^{-5} \leq C \leq 2^{15} & \text{with step } \Delta C = 2 \\ 2^{-15} \leq \gamma \leq 2^{-5} & \text{with step } \Delta \gamma = 2^{-1} \end{cases}, \quad (\text{Equation 12})$$

where  $\Delta C$  and  $\Delta \gamma$  represent the step gaps for  $C$  and  $\gamma$ , respectively.

For those readers who are interested in knowing more about SVM, see Chou and Cai<sup>104</sup> and Cai et al.<sup>105</sup> or a monograph<sup>106</sup> where a brief introduction or detailed description were given, respectively.

The platform predictor obtained via the aforementioned procedures is called “iRNA-PseColl,” where “i” stands for “identify,” “Pse” for “pseudo component approach,” and “Coll” for “collective effects of nucleotides.”

### Quality Control or Examination

Quality control is a very important process in industries; it is even more important for a predictor. To deal with this problem, we need to address the following two issues: (1) what standard or metrics should we adopt to measure the predictor’s quality, and (2) what test process or method we should take to calculate the metrics. Below, we address the two problems.

### A Set of Four Intuitive Metrics

The current prediction is belonging to the category called “binary classification” widely existing in genome analyses. To measure the prediction quality of this kind, a set of four metrics are usually used in literature<sup>107</sup>: (1) sensitivity or  $S_n$ , (2) specificity or  $S_p$ , (3) overall accuracy or  $Acc$ , and (4) Mathew’s correlation coefficient or  $MCC$ . Unfortunately, their formulations were directly taken from mathematical literature and difficult to be understood by most biological scientists. Fortunately, using the symbols introduced by Chou<sup>108</sup> in

**Table 2. Classification of Nucleotides**

| Angle of View        | Attribute  | Nucleotides |
|----------------------|------------|-------------|
| (1) Ring structure   | purine     | A, G        |
|                      | pyrimidine | C, U        |
| (2) Functional group | amino      | A, C        |
|                      | keto       | G, U        |
| (3) Hydrogen bonding | stronger   | C, G        |
|                      | weaker     | A, U        |

See [Local Features of Individual Nucleotides](#) for further explanation.

studying signal peptides, Xu et al.<sup>109</sup> and Chen et al.<sup>110</sup> have derived a new set of metrics that is equivalent to the old one but much more intuitive and easier to be understood by most biologists, as given below

To address this, we need to consider two issues: one is what metrics should be used to reflect the predictor's success rates; the other is what test method should be adopted to derive the metrics rates.

To quantitatively evaluate the quality of a binary classification predictor, four metrics are generally needed.<sup>107</sup> They are: (1) Acc for the predictor's overall accuracy; (2) MCC for its stability; (3) Sn for its sensitivity; and (4) Sp for its specificity. Unfortunately, the conventional formulations for the four metrics are not quite intuitive, and most biologists have difficulty understanding them, particularly the stability of MCC. Fortunately, as elaborated in Yu et al.<sup>109</sup> and Chen et al.,<sup>110</sup> by using the Chou's<sup>111</sup> symbols and derivation in studying signal peptides, the conventional metrics can be converted into a set of four intuitive equations, as formulated below:

$$\left\{ \begin{array}{l} \text{Sn} = 1 - \frac{N_+^-}{N_+^+} \quad 0 \leq \text{Sn} \leq 1 \\ \text{Sp} = 1 - \frac{N_+^-}{N_+^-} \quad 0 \leq \text{Sp} \leq 1 \\ \text{Acc} = \Lambda = 1 - \frac{N_+^+ + N_+^-}{N_+^+ + N_+^-} \quad 0 \leq \text{Acc} \leq 1 \\ \text{MCC} = \frac{1 - \left( \frac{N_+^+}{N_+^+} + \frac{N_+^-}{N_+^-} \right)}{\sqrt{\left( 1 + \frac{N_+^- - N_+^+}{N_+^+} \right) \left( 1 + \frac{N_+^+ - N_+^-}{N_+^-} \right)}} \quad -1 \leq \text{MCC} \leq 1 \end{array} \right. ,$$

(Equation 13)

where  $N_+^+$  represents the total number of positive samples investigated,  $N_+^-$  is the number of positive samples incorrectly predicted to be the negative,  $N_+^-$  is the total number of negative samples investigated, and  $N_+^+$  is the number of the negative samples incorrectly predicted to be the positive.

With the metrics of [Equation 13](#), the meanings of Sn, Sp, Acc, and MCC have become crystal clear as discussed and used in a series of

follow-up studies for many different areas.<sup>20, 21, 38, 40, 42, 44–49, 56, 57, 61, 67, 80, 82, 84, 97, 99, 112–115</sup> It is instructive to point out that more multi-label sequence samples have been emerging in system biology and medicine.<sup>49, 116–119</sup> To deal with this kind of multi-label system, a much more sophisticated set of metrics is needed as elaborated in Chou.<sup>120</sup>

### Jackknife Validation

Three different cross-validation methods are often adopted in literature. These methods include<sup>24</sup>: (1) an independent dataset test, (2) a subsampling (or K-fold cross-validation) test, and (3) the jackknife test. However, as elucidated in Chou<sup>55</sup> in the above three choices, the jackknife test has been demonstrated to be the least arbitrary that can always yield a unique outcome for a given benchmark dataset. Therefore, the jackknife test has been widely recognized and increasingly adopted by researchers to analyze the quality of various predictors.<sup>83, 103, 121–131</sup> In view of this, we also used the jackknife test to examine the quality of the current prediction method. The jackknife test can exclude the “memory” effect because both the training dataset and testing dataset in a jackknife system are actually open, and each sample will be, in turn, moved between the two. The arbitrariness problem intrinsic to the independent dataset and subsampling tests<sup>55</sup> no longer exists, because the outcome derived via the jackknife test for a predictor is always the same on a given benchmark dataset.

### SUPPLEMENTAL INFORMATION

Supplemental Information includes Supplemental Materials and Methods and can be found with this article online at <http://dx.doi.org/10.1016/j.omtn.2017.03.006>.

### AUTHOR CONTRIBUTIONS

W.C., H.L., and K.-C.C. conceived and designed the study. P.F. and H.D. conducted the experiments. P.F., H.D., and W.C. implemented the algorithms. H.Y. established the web server. W.C., H.L., and K.-C.C. performed the analysis and wrote the paper. All authors read and approved the final manuscript.

### CONFLICTS OF INTEREST

The authors declare no conflict of interest.

### ACKNOWLEDGMENTS

The authors wish to thank the two anonymous reviewers for their constructive comments, which were very helpful for strengthening the presentation of this paper. This work was supported by the Program for the Top Young Innovative Talents of Higher Learning Institutions of Hebei Province (BJ2014028), the Outstanding Youth Foundation of North China University of Science and Technology (JP201502), the China Postdoctoral Science Foundation (2015M582533), and the Fundamental Research Funds for the Central Universities, China (ZYGX2015J144 and ZYGX2015Z006).

### REFERENCES

- Davis, F.F., and Allen, F.W. (1957). Ribonucleic acids from yeast which contain a fifth nucleotide. *J. Biol. Chem.* 227, 907–915.

2. Machnicka, M.A., Milanowska, K., Osman Oglou, O., Purta, E., Kurkowska, M., Olchowik, A., Januszewski, W., Kalinowski, S., Dunin-Horkawicz, S., Rother, K.M., et al. (2013). MODOMICS: a database of RNA modification pathways—2013 update. *Nucleic Acids Res.* *41*, D262–D267.
3. Meyer, K.D., and Jaffrey, S.R. (2014). The dynamic epitranscriptome: N6-methyladenosine and gene expression control. *Nat. Rev. Mol. Cell Biol.* *15*, 313–326.
4. Nilsen, T.W. (2014). Molecular biology. Internal mRNA methylation finally finds functions. *Science* *343*, 1207–1208.
5. Peifer, C., Sharma, S., Watzinger, P., Lamberth, S., Kötter, P., and Entian, K.D. (2013). Yeast Rrp8p, a novel methyltransferase responsible for m1A 645 base modification of 25S rRNA. *Nucleic Acids Res.* *41*, 1151–1163.
6. Ballesta, J.P., and Cundliffe, E. (1991). Site-specific methylation of 16S rRNA caused by pct, a pactamycin resistance determinant from the producing organism, *Streptomyces pactum*. *J. Bacteriol.* *173*, 7213–7218.
7. Chen, T., Hao, Y.J., Zhang, Y., Li, M.M., Wang, M., Han, W., Wu, Y., Lv, Y., Hao, J., Wang, L., et al. (2015). m(6A) RNA methylation is regulated by microRNAs and promotes reprogramming to pluripotency. *Cell Stem Cell* *16*, 289–301.
8. Hoernes, T.P., Hüttenhofer, A., and Erlacher, M.D. (2016). mRNA modifications: dynamic regulators of gene expression? *RNA Biol.* *13*, 760–765.
9. Dominissini, D., Nachtgaele, S., Moshitch-Moshkovitz, S., Peer, E., Kol, N., Ben-Haim, M.S., Dai, Q., Di Segni, A., Salmon-Divon, M., Clark, W.C., et al. (2016). The dynamic N(1)-methyladenosine methylome in eukaryotic messenger RNA. *Nature* *530*, 441–446.
10. Li, X., Xiong, X., Wang, K., Wang, L., Shu, X., Ma, S., and Yi, C. (2016). Transcriptome-wide mapping reveals reversible and dynamic N(1)-methyladenosine methylome. *Nat. Chem. Biol.* *12*, 311–316.
11. Cai, L., Yuan, W., Zhang, Z., He, L., and Chou, K.C. (2016). In-depth comparison of somatic point mutation callers based on different tumor next-generation sequencing depth data. *Sci. Rep.* *6*, 36540.
12. Khoddami, V., and Cairns, B.R. (2014). Transcriptome-wide target profiling of RNA cytosine methyltransferases using the mechanism-based enrichment procedure Aza-IP. *Nat. Protoc.* *9*, 337–361.
13. Dominissini, D., Moshitch-Moshkovitz, S., Schwartz, S., Salmon-Divon, M., Ungar, L., Osenberg, S., Cesarkas, K., Jacob-Hirsch, J., Amariglio, N., Kupiec, M., et al. (2012). Topology of the human and mouse m6A RNA methylomes revealed by m6A-seq. *Nature* *485*, 201–206.
14. Schwartz, S., Agarwala, S.D., Mumbach, M.R., Jovanovic, M., Mertins, P., Shishkin, A., Tabach, Y., Mikkelsen, T.S., Sattija, R., Ruvkun, G., et al. (2013). High-resolution mapping reveals a conserved, widespread, dynamic mRNA methylation program in yeast meiosis. *Cell* *155*, 1409–1421.
15. Squires, J.E., Patel, H.R., Nusch, M., Sibbritt, T., Humphreys, D.T., Parker, B.J., Suter, C.M., and Preiss, T. (2012). Widespread occurrence of 5-methylcytosine in human coding and non-coding RNA. *Nucleic Acids Res.* *40*, 5023–5033.
16. Chen, W., Feng, P., Tang, H., Ding, H., and Lin, H. (2016). RAMPred: identifying the N(1)-methyladenosine sites in eukaryotic transcriptomes. *Sci. Rep.* *6*, 31080.
17. Chen, W., Tran, H., Liang, Z., Lin, H., and Zhang, L. (2015). Identification and analysis of the N(6)-methyladenosine in the *Saccharomyces cerevisiae* transcriptome. *Sci. Rep.* *5*, 13859.
18. Chen, W., Feng, P., Tang, H., Ding, H., and Lin, H. (2016). Identifying 2'-O-methylation sites by integrating nucleotide chemical properties and nucleotide compositions. *Genomics* *107*, 255–258.
19. Feng, P., Ding, H., Chen, W., and Lin, H. (2016). Identifying RNA 5-methylcytosine sites via pseudo nucleotide compositions. *Mol. Biosyst.* *12*, 3307–3311.
20. Chen, W., Feng, P., Ding, H., Lin, H., and Chou, K.C. (2015). iRNA-methyl: identifying N6-methyladenosine sites using pseudo nucleotide composition. *Anal. Biochem.* *490*, 26–33.
21. Liu, Z., Xiao, X., Yu, D.J., Jia, J., Qiu, W.R., and Chou, K.C. (2016). pRNAm-PC: Predicting N(6)-methyladenosine sites in RNA sequences via physical-chemical properties. *Anal. Biochem.* *497*, 60–67.
22. Chen, W., Lei, T.Y., Jin, D.C., Lin, H., and Chou, K.C. (2014). PseKNC: a flexible web server for generating pseudo K-tuple nucleotide composition. *Anal. Biochem.* *456*, 53–60.
23. Chen, W., Lin, H., and Chou, K.C. (2015). Pseudo nucleotide composition or PseKNC: an effective formulation for analyzing genomic sequences. *Mol. Biosyst.* *11*, 2620–2634.
24. Chou, K.C., and Zhang, C.T. (1995). Prediction of protein structural classes. *Crit. Rev. Biochem. Mol. Biol.* *30*, 275–349.
25. Chou, K.C., Jiang, S.P., Liu, W.M., and Fee, C.H. (1979). Graph theory of enzyme kinetics: I. Steady-state reaction system. *Sci. Sin.* *22*, 341–358.
26. Chou, K.C., and Forsén, S. (1980). Graphical rules for enzyme-catalysed rate laws. *Biochem. J.* *187*, 829–835.
27. Zhou, G.P., and Deng, M.H. (1984). An extension of Chou's graphic rules for deriving enzyme kinetic equations to systems involving parallel reaction pathways. *Biochem. J.* *222*, 169–176.
28. Chou, K.C. (1989). Graphic rules in steady and non-steady state enzyme kinetics. *J. Biol. Chem.* *264*, 12074–12079.
29. Althaus, I.W., Gonzales, A.J., Chou, J.J., Romero, D.L., Deibel, M.R., Chou, K.C., Kezdy, F.J., Resnick, L., Busso, M.E., So, A.G., et al. (1993). The quinoline U-78036 is a potent inhibitor of HIV-1 reverse transcriptase. *J. Biol. Chem.* *268*, 14875–14880.
30. Althaus, I.W., Chou, J.J., Gonzales, A.J., Deibel, M.R., Chou, K.C., Kezdy, F.J., Romero, D.L., Palmer, J.R., Thomas, R.C., Aristoff, P.A., et al. (1993). Kinetic studies with the non-nucleoside HIV-1 reverse transcriptase inhibitor U-88204E. *Biochemistry* *32*, 6548–6554.
31. Wu, Z.C., Xiao, X., and Chou, K.C. (2010). 2D-MH: A web-server for generating graphic representation of protein sequences based on the physicochemical properties of their constituent amino acids. *J. Theor. Biol.* *267*, 29–34.
32. Chou, K.C., Lin, W.Z., and Xiao, X. (2011). Wenxiang: a web-server for drawing wenxiang diagrams. *Nat. Sci.* *3*, 862–865.
33. Zhou, G.P. (2011). The disposition of the LZCC protein residues in wenxiang diagram provides new insights into the protein-protein interaction mechanism. *J. Theor. Biol.* *284*, 142–148.
34. Zhou, G.P., Chen, D., Liao, S., and Huang, R.B. (2016). Recent progresses in studying helix-helix interactions in proteins by incorporating the Wenxiang diagram into the NMR spectroscopy. *Curr. Top. Med. Chem.* *16*, 581–590.
35. Fawcett, T. (2005). An introduction to ROC analysis. *Pattern Recognit. Lett.* *27*, 861–874.
36. Davis, J., and Goadrich, M. (2006). The relationship between precision-recall and ROC curves. *Proceedings of the 23rd International Conference on Machine Learning*, pp. 233–240.
37. Zhang, C.J., Tang, H., Li, W.C., Lin, H., Chen, W., and Chou, K.C. (2016). iOri-human: identify human origin of replication by incorporating dinucleotide physicochemical properties into pseudo nucleotide composition. *Oncotarget* *7*, 69783–69793.
38. Jia, J., Liu, Z., Xiao, X., Liu, B., and Chou, K.C. (2015). iPPI-Esml: an ensemble classifier for identifying the interactions of proteins by incorporating their physicochemical properties and wavelet transforms into PseAAC. *J. Theor. Biol.* *377*, 47–56.
39. Xiao, X., Ye, H.X., Liu, Z., Jia, J.H., and Chou, K.C. (2016). iROS-gPseKNC: predicting replication origin sites in DNA by incorporating dinucleotide position-specific propensity into general pseudo nucleotide composition. *Oncotarget* *7*, 34180–34189.
40. Liu, B., Fang, L., Wang, S., Wang, X., Li, H., and Chou, K.C. (2015). Identification of microRNA precursor with the degenerate K-tuple or Kmer strategy. *J. Theor. Biol.* *385*, 153–159.
41. Chen, W., Ding, H., Feng, P., Lin, H., and Chou, K.C. (2016). iACP: a sequence-based tool for identifying anticancer peptides. *Oncotarget* *7*, 16895–16909.
42. Liu, Z., Xiao, X., Qiu, W.R., and Chou, K.C. (2015). iDNA-methyl: identifying DNA methylation sites via pseudo trinucleotide composition. *Anal. Biochem.* *474*, 69–77.
43. Chen, W., Tang, H., Ye, J., Lin, H., and Chou, K.C. (2016). iRNA-PseU: identifying RNA pseudouridine sites. *Mol. Ther. Nucleic Acids* *5*, e332.
44. Jia, J., Liu, Z., Xiao, X., Liu, B., and Chou, K.C. (2016). iSuc-PseOpt: identifying lysine succinylation sites in proteins by incorporating sequence-coupling effects into pseudo components and optimizing imbalanced training dataset. *Anal. Biochem.* *497*, 48–56.

45. Qiu, W.R., Sun, B.Q., Xiao, X., Xu, Z.C., and Chou, K.C. (2016). iHyd-PseCp: identify hydroxyproline and hydroxylysine in proteins by incorporating sequence-coupled effects into general PseAAC. *Oncotarget* 7, 44310–44321.
46. Qiu, W.R., Xiao, X., Xu, Z.C., and Chou, K.C. (2016). iPhos-PseEn: identifying phosphorylation sites in proteins by fusing different pseudo components into an ensemble classifier. *Oncotarget* 7, 51270–51283.
47. Jia, J., Liu, Z., Xiao, X., Liu, B., and Chou, K.C. (2016). pSuc-Lys: predict lysine succinylation sites in proteins with PseAAC and ensemble random forest approach. *J. Theor. Biol.* 394, 223–230.
48. Jia, J., Zhang, L., Liu, Z., Xiao, X., and Chou, K.C. (2016). pSumo-CD: predicting sumoylation sites in proteins with covariance discriminant algorithm by incorporating sequence-coupled effects into general PseAAC. *Bioinformatics* 32, 3133–3141.
49. Qiu, W.R., Sun, B.Q., Xiao, X., Xu, Z.C., and Chou, K.C. (2016). iPTM-mLys: identifying multiple lysine PTM sites and their different types. *Bioinformatics* 32, 3116–3123.
50. Meher, P.K., Sahu, T.K., Saini, V., and Rao, A.R. (2017). Predicting antimicrobial peptides with improved accuracy by incorporating the compositional, physicochemical and structural features into Chou's general PseAAC. *Sci. Rep.* 7, 42362.
51. Chen, W., Feng, P., Yang, H., Ding, H., Lin, H., and Chou, K.C. (2017). iRNA-AI: identifying the adenosine to inosine editing sites in RNA sequences. *Oncotarget* 8, 4208–4217.
52. Liu, B., Wang, S., Long, R., and Chou, K.C. (2017). iRSpot-EL: identify recombination spots with an ensemble learning approach. *Bioinformatics* 33, 35–41.
53. Liu, B., Wu, H., Zhang, D., Wang, X., and Chou, K.C. (2017). Pse-Analysis: a python package for DNA/RNA and protein/peptide sequence analysis based on pseudo components and kernel methods. *Oncotarget* 8, 4208–4217.
54. Chou, K.C. (2015). Impacts of bioinformatics to medicinal chemistry. *Med. Chem.* 11, 218–234.
55. Chou, K.C. (2011). Some remarks on protein attribute prediction and pseudo amino acid composition. *J. Theor. Biol.* 273, 236–247.
56. Jia, J., Liu, Z., Xiao, X., Liu, B., and Chou, K.C. (2016). iPPBS-Opt: a sequence-based ensemble classifier for identifying protein-protein binding sites by optimizing imbalanced training datasets. *Molecules* 21, E95.
57. Jia, J., Liu, Z., Xiao, X., Liu, B., and Chou, K.C. (2016). iCar-PseCp: identify carbonylation sites in proteins by Monte Carlo sampling and incorporating sequence coupled effects into general PseAAC. *Oncotarget* 7, 34558–34570.
58. Liu, B., Fang, L., Liu, F., Wang, X., and Chou, K.C. (2016). iMiRNA-PseDPC: microRNA precursor identification with a pseudo distance-pair composition approach. *J. Biomol. Struct. Dyn.* 34, 223–235.
59. Liu, B., Fang, L., Long, R., Lan, X., and Chou, K.C. (2016). iEnhancer-2L: a two-layer predictor for identifying enhancers and their strength by pseudo k-tuple nucleotide composition. *Bioinformatics* 32, 362–369.
60. Liu, B., Long, R., and Chou, K.C. (2016). iDHS-EL: identifying DNase I hypersensitive sites by fusing three different modes of pseudo nucleotide composition into an ensemble learning framework. *Bioinformatics* 32, 2411–2418.
61. Qiu, W., Sun, B.Q., Xiao, X., and Chou, K.C. (2016). iPhos-PseEvo: identifying human phosphorylated proteins by incorporating evolutionary information into general PseAAC via grey system theory. *Mol. Inform.* <http://dx.doi.org/10.1002/minf.201600010>.
62. Cheng, X., Zhao, S.G., Xiao, X., and Chou, K.C. (2016). iATC-mISF: a multi-label classifier for predicting the classes of anatomical therapeutic chemicals. *Bioinformatics* 33, 341–346.
63. Khan, M., Hayat, M., Khan, S.A., and Iqbal, N. (2017). Unb-DPC: Identify mycobacterial membrane protein types by incorporating un-biased dipeptide composition into Chou's general PseAAC. *J. Theor. Biol.* 415, 13–19.
64. Chou, K.C., and Shen, H.B. (2007). Recent progress in protein subcellular location prediction. *Anal. Biochem.* 370, 1–16.
65. Chou, K.C. (2001). Prediction of signal peptides using scaled window. *Peptides* 22, 1973–1979.
66. Chen, W., Tang, H., and Lin, H. (2016). MethyRNA: a web server for identification of N6-methyladenosine sites. *J. Biomol. Struct. Dyn.* 35, 683–687.
67. Xiao, X., Min, J.L., Lin, W.Z., Liu, Z., Cheng, X., and Chou, K.C. (2015). iDrug-Target: predicting the interactions between drug compounds and target proteins in cellular networking via benchmark dataset optimization approach. *J. Biomol. Struct. Dyn.* 33, 2221–2233.
68. Chou, K.C. (2001). Prediction of protein cellular attributes using pseudo amino acid composition. *Proteins* 43, 246–255.
69. Chou, K.C. (2005). Using amphiphilic pseudo amino acid composition to predict enzyme subfamily classes. *Bioinformatics* 21, 10–19.
70. Du, P., Wang, X., Xu, C., and Gao, Y. (2012). PseAAC-Builder: a cross-platform stand-alone program for generating various special Chou's pseudo-amino acid compositions. *Anal. Biochem.* 425, 117–119.
71. Cao, D.S., Xu, Q.S., and Liang, Y.Z. (2013). propy: a tool to generate various modes of Chou's PseAAC. *Bioinformatics* 29, 960–962.
72. Du, P., Gu, S., and Jiao, Y. (2014). PseAAC-General: fast building various modes of general form of Chou's pseudo-amino acid composition for large-scale protein datasets. *Int. J. Mol. Sci.* 15, 3495–3506.
73. Chou, K.C. (2009). Pseudo amino acid composition and its applications in bioinformatics, proteomics and system biology. *Curr. Proteomics* 6, 262–274.
74. Chen, W., Zhang, X., Brooker, J., Lin, H., Zhang, L., and Chou, K.C. (2015). PseKNC-General: a cross-platform package for generating various modes of pseudo nucleotide compositions. *Bioinformatics* 31, 119–120.
75. Liu, B., Liu, F., Fang, L., Wang, X., and Chou, K.C. (2015). repDNA: a Python package to generate various modes of feature vectors for DNA sequences by incorporating user-defined physicochemical properties and sequence-order effects. *Bioinformatics* 31, 1307–1309.
76. Liu, B., Liu, F., Fang, L., Wang, X., and Chou, K.C. (2016). repRNA: a web server for generating various feature vectors of RNA sequences. *Mol. Genet. Genomics* 291, 473–481.
77. Chen, W., Feng, P.M., Deng, E.Z., Lin, H., and Chou, K.C. (2014). iTIS-PseTNC: a sequence-based predictor for identifying translation initiation site in human genes using pseudo trinucleotide composition. *Anal. Biochem.* 462, 76–83.
78. Chen, W., Feng, P.M., Lin, H., and Chou, K.C. (2014). iSS-PseDNC: identifying splicing sites using pseudo dinucleotide composition. *BioMed Res. Int.* 2014, 623149.
79. Guo, S.H., Deng, E.Z., Xu, L.Q., Ding, H., Lin, H., Chen, W., and Chou, K.C. (2014). iNuc-PseKNC: a sequence-based predictor for predicting nucleosome positioning in genomes with pseudo k-tuple nucleotide composition. *Bioinformatics* 30, 1522–1529.
80. Lin, H., Deng, E.Z., Ding, H., Chen, W., and Chou, K.C. (2014). iPro54-PseKNC: a sequence-based predictor for identifying sigma-54 promoters in prokaryote with pseudo k-tuple nucleotide composition. *Nucleic Acids Res.* 42, 12961–12972.
81. Qiu, W.R., Xiao, X., and Chou, K.C. (2014). iRSpot-TNCPseAAC: identify recombination spots with trinucleotide composition and pseudo amino acid components. *Int. J. Mol. Sci.* 15, 1746–1766.
82. Liu, B., Fang, L., Liu, F., Wang, X., Chen, J., and Chou, K.C. (2015). Identification of real microRNA precursors with a pseudo structure status composition approach. *PLoS ONE* 10, e0121501.
83. Kabir, M., and Hayat, M. (2016). iRSpot-GAEnsC: identifying recombination spots via ensemble classifier and extending the concept of Chou's PseAAC to formulate DNA samples. *Mol. Genet. Genomics* 291, 285–296.
84. Chen, W., Feng, P., Ding, H., Lin, H., and Chou, K.C. (2016). Using deformation energy to analyze nucleosome positioning in genomes. *Genomics* 107, 69–75.
85. Tahir, M., and Hayat, M. (2016). iNuc-STNC: a sequence-based predictor for identification of nucleosome positioning in genomes by extending the concept of SAAC and Chou's PseAAC. *Mol. Biosyst.* 12, 2587–2593.
86. Liu, B., Liu, F., Wang, X., Chen, J., Fang, L., and Chou, K.C. (2015). Pse-in-One: a web server for generating various modes of pseudo components of DNA, RNA, and protein sequences. *Nucleic Acids Res.* 43 (W1), W65–W71.
87. Chou, K.C. (1984). Low-frequency vibrations of DNA molecules. *Biochem. J.* 221, 27–31.
88. Chou, K.C., Maggiora, G.M., and Mao, B. (1989). Quasi-continuum models of twist-like and accordion-like low-frequency motions in DNA. *Biophys. J.* 56, 295–305.



89. Chou, K.C., Chen, N.Y., and Forsen, S. (1981). The biological functions of low-frequency phonons: 2. Cooperative effects. *Chem. Scr.* 18, 126–132.
90. Chou, K.C., and Mao, B. (1988). Collective motion in DNA and its role in drug intercalation. *Biopolymers* 27, 1795–1815.
91. Chou, K.C. (1988). Low-frequency collective motion in biomacromolecules and its biological functions. *Biophys. Chem.* 30, 3–48.
92. Chou, K.C., and Zhang, C.T. (1992). Diagrammatization of codon usage in 339 human immunodeficiency virus proteins and its biological implication. *AIDS Res. Hum. Retroviruses* 8, 1967–1976.
93. Zhang, C.T., and Chou, K.C. (1994). A graphic approach to analyzing codon usage in 1562 *Escherichia coli* protein coding sequences. *J. Mol. Biol.* 238, 1–8.
94. Chou, K.C. (1995). A sequence-coupled vector-projection model for predicting the specificity of GalNAc-transferase. *Protein Sci.* 4, 1365–1383.
95. Feng, P.M., Chen, W., Lin, H., and Chou, K.C. (2013). iHSP-PseRAAAC: Identifying the heat shock protein families using pseudo reduced amino acid alphabet composition. *Anal. Biochem.* 442, 118–125.
96. Liu, B., Zhang, D., Xu, R., Xu, J., Wang, X., Chen, Q., Dong, Q., and Chou, K.C. (2014). Combining evolutionary information extracted from frequency profiles with sequence-based kernels for protein remote homology detection. *Bioinformatics* 30, 472–479.
97. Ding, H., Deng, E.Z., Yuan, L.F., Liu, L., Lin, H., Chen, W., and Chou, K.C. (2014). iCTX-type: a sequence-based predictor for identifying the types of conotoxins in targeting ion channels. *BioMed Res. Int.* 2014, 286419.
98. Fan, Y.N., Xiao, X., Min, J.L., and Chou, K.C. (2014). iNR-Drug: predicting the interaction of drugs with nuclear receptors in cellular networking. *Int. J. Mol. Sci.* 15, 4915–4937.
99. Xu, Y., Wen, X., Shao, X.J., Deng, N.Y., and Chou, K.C. (2014). iHyd-PseAAC: predicting hydroxyproline and hydroxylysine in proteins by incorporating dipeptide position-specific propensity into pseudo amino acid composition. *Int. J. Mol. Sci.* 15, 7594–7610.
100. Liu, B., Xu, J., Lan, X., Xu, R., Zhou, J., Wang, X., and Chou, K.C. (2014). iDNA-Prot|dis: identifying DNA-binding proteins by incorporating amino acid distance-pairs and reduced alphabet profile into the general pseudo amino acid composition. *PLoS ONE* 9, e106691.
101. Qiu, W.R., Xiao, X., Lin, W.Z., and Chou, K.C. (2015). iUbiq-Lys: prediction of lysine ubiquitination sites in proteins by extracting sequence evolution information via a gray system model. *J. Biomol. Struct. Dyn.* 33, 1731–1742.
102. Xu, R., Zhou, J., Liu, B., He, Y., Zou, Q., Wang, X., and Chou, K.C. (2015). Identification of DNA-binding proteins by incorporating evolutionary information into pseudo amino acid composition via the top-n-gram approach. *J. Biomol. Struct. Dyn.* 33, 1720–1730.
103. Chen, J., Long, R., Wang, X.L., Liu, B., and Chou, K.C. (2016). dRHP-PseRA: detecting remote homology proteins using profile-based pseudo protein sequence and rank aggregation. *Sci. Rep.* 6, 32333.
104. Chou, K.C., and Cai, Y.D. (2002). Using functional domain composition and support vector machines for prediction of protein subcellular location. *J. Biol. Chem.* 277, 45765–45769.
105. Cai, Y.D., Zhou, G.P., and Chou, K.C. (2003). Support vector machines for predicting membrane protein types by using functional domain composition. *Biophys. J.* 84, 3257–3263.
106. Cristianini, N., and Shawe-Taylor, J. (2000). *An Introduction to Support Vector Machines and Other Kernel-based Learning Methods, Chapter 3* (Cambridge University Press).
107. Chen, J., Liu, H., Yang, J., and Chou, K.C. (2007). Prediction of linear B-cell epitopes using amino acid pair antigenicity scale. *Amino Acids* 33, 423–428.
108. Chou, K.C. (2001). Using subsite coupling to predict signal peptides. *Protein Eng.* 14, 75–79.
109. Xu, Y., Ding, J., Wu, L.Y., and Chou, K.C. (2013). iSNO-PseAAC: predict cysteine S-nitrosylation sites in proteins by incorporating position specific amino acid propensity into pseudo amino acid composition. *PLoS ONE* 8, e55844.
110. Chen, W., Feng, P.M., Lin, H., and Chou, K.C. (2013). iRSpot-PseDNC: identify recombination spots with pseudo dinucleotide composition. *Nucleic Acids Res.* 41, e68.
111. Chou, K.C. (2001). Prediction of protein signal sequences and their cleavage sites. *Proteins* 42, 136–139.
112. Xu, Y., Shao, X.J., Wu, L.Y., Deng, N.Y., and Chou, K.C. (2013). iSNO-AAPair: incorporating amino acid pairwise coupling into PseAAC for predicting cysteine S-nitrosylation sites in proteins. *PeerJ* 1, e171.
113. Jia, J., Liu, Z., Xiao, X., Liu, B., and Chou, K.C. (2016). Identification of protein-protein binding sites by incorporating the physicochemical properties and stationary wavelet transforms into pseudo amino acid composition. *J. Biomol. Struct. Dyn.* 34, 1946–1961.
114. Xu, Y., and Chou, K.C. (2016). Recent progress in predicting posttranslational modification sites in proteins. *Curr. Top. Med. Chem.* 16, 591–603.
115. Xu, Y., Wen, X., Wen, L.S., Wu, L.Y., Deng, N.Y., and Chou, K.C. (2014). iNitro-Tyr: prediction of nitrotyrosine sites in proteins with general pseudo amino acid composition. *PLoS ONE* 9, e105018.
116. Xiao, X., Wu, Z.C., and Chou, K.C. (2011). iLoc-Virus: a multi-label learning classifier for identifying the subcellular localization of virus proteins with both single and multiple sites. *J. Theor. Biol.* 284, 42–51.
117. Chou, K.C., Wu, Z.C., and Xiao, X. (2012). iLoc-Hum: using the accumulation-label scale to predict subcellular locations of human proteins with both single and multiple sites. *Mol. Biosyst.* 8, 629–641.
118. Xiao, X., Wang, P., Lin, W.Z., Jia, J.H., and Chou, K.C. (2013). iAMP-2L: a two-level multi-label classifier for identifying antimicrobial peptides and their functional types. *Anal. Biochem.* 436, 168–177.
119. Lin, W.Z., Fang, J.A., Xiao, X., and Chou, K.C. (2013). iLoc-Animal: a multi-label learning classifier for predicting subcellular localization of animal proteins. *Mol. Biosyst.* 9, 634–644.
120. Chou, K.C. (2013). Some remarks on predicting multi-label attributes in molecular biosystems. *Mol. Biosyst.* 9, 1092–1100.
121. Zhou, G.P., and Assa-Munt, N. (2001). Some insights into protein structural class prediction. *Proteins* 44, 57–59.
122. Zhou, G.P., and Doctor, K. (2003). Subcellular location prediction of apoptosis proteins. *Proteins* 50, 44–48.
123. Chou, K.C., and Cai, Y.D. (2005). Prediction of membrane protein types by incorporating amphipathic effects. *J. Chem. Inf. Model.* 45, 407–413.
124. Mondal, S., and Pai, P.P. (2014). Chou's pseudo amino acid composition improves sequence-based antifreeze protein prediction. *J. Theor. Biol.* 356, 30–35.
125. Dehzangi, A., Heffernan, R., Sharma, A., Lyons, J., Paliwal, K., and Sattar, A. (2015). Gram-positive and Gram-negative protein subcellular localization by incorporating evolutionary-based descriptors into Chou's general PseAAC. *J. Theor. Biol.* 364, 284–294.
126. Khan, Z.U., Hayat, M., and Khan, M.A. (2015). Discrimination of acidic and alkaline enzyme using Chou's pseudo amino acid composition in conjunction with probabilistic neural network model. *J. Theor. Biol.* 365, 197–203.
127. Kumar, R., Srivastava, A., Kumari, B., and Kumar, M. (2015). Prediction of  $\beta$ -lactamase and its class by Chou's pseudo-amino acid composition and support vector machine. *J. Theor. Biol.* 365, 96–103.
128. Ali, F., and Hayat, M. (2015). Classification of membrane protein types using voting feature interval in combination with Chou's pseudo amino acid composition. *J. Theor. Biol.* 384, 78–83.
129. Ahmad, K., Waris, M., and Hayat, M. (2016). Prediction of protein submitochondrial locations by incorporating dipeptide composition into Chou's general pseudo amino acid composition. *J. Membr. Biol.* 249, 293–304.
130. Ju, Z., Cao, J.Z., and Gu, H. (2016). Predicting lysine phosphoglycylation with fuzzy SVM by incorporating k-spaced amino acid pairs into Chou's general PseAAC. *J. Theor. Biol.* 397, 145–150.
131. Behbahani, M., Mohabatkar, H., and Nosrati, M. (2016). Analysis and comparison of lignin peroxidases between fungi and bacteria using three different modes of Chou's general pseudo amino acid composition. *J. Theor. Biol.* 411, 1–5.

OMTN, Volume 7

## **Supplemental Information**

### **iRNA-PseColl: Identifying the Occurrence Sites of Different RNA Modifications by Incorporating Collective Effects of Nucleotides into PseKNC**

**Pengmian Feng, Hui Ding, Hui Yang, Wei Chen, Hao Lin, and Kuo-Chen Chou**

## Supporting Information S1. User Guide for the iRNA-PseColl predictor

To maximize users' convenience, a step-to-step guide of how to use the iRNA-PseColl predictor to identify the occurrence sites of the three different types of RNA modifications is given below.

**Step 1.** Open the iRNA-PseColl web-server at <http://lin.uestc.edu.cn/server/iRNA-PseColl> and you will see its top page on your computer screen, as shown in **Fig.S1**. Click on the [Read Me](#) button to see a brief introduction about the platform and the caveat when using it.

**Figure S1.** A semi-screenshot for the homepage of the proposed iRNA-PseColl predictor, which is freely accessible at <http://lin.uestc.edu.cn/server/iRNA-PseColl>.

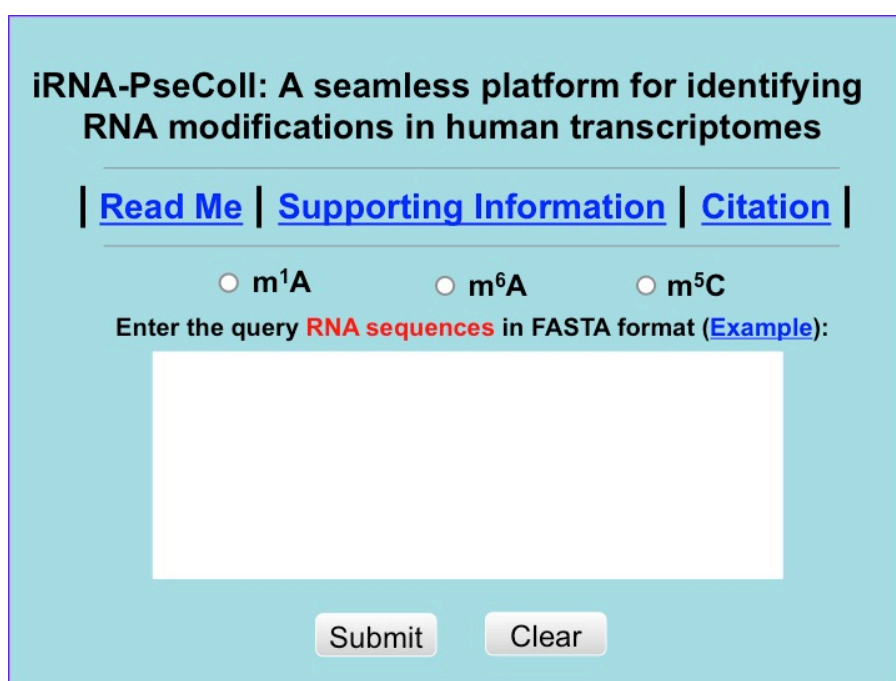

**iRNA-PseColl: A seamless platform for identifying RNA modifications in human transcriptomes**

| [Read Me](#) | [Supporting Information](#) | [Citation](#) |

m<sup>1</sup>A       m<sup>6</sup>A       m<sup>5</sup>C

Enter the query **RNA sequences** in FASTA format ([Example](#)):

    

**Step 2.** Select which type of RNA modification you are concerned with. For example, if you are interested in the type of m<sup>1</sup>A, check the 1<sup>st</sup> button “m<sup>1</sup>A” on; if type of m<sup>6</sup>A, check the 2<sup>nd</sup> button “m<sup>6</sup>A” on; if type of m<sup>5</sup>C, check the 3<sup>rd</sup> button “m<sup>6</sup>C” on. Then, Either type or copy/paste the query RNA sequences into the input box at the center of **Fig.S1**. The input sequence should be in the FASTA format. For the examples of sequences in FASTA format, click the [Example](#) button right above the input box.

**Step 3.** Click on the [Submit](#) button to see the predicted outcome. For example, if you use the three query RNA sequences in the [Example](#) window as the input and select m<sup>1</sup>A type, after 15 seconds or so, you will see the following shown on the screen of your computer: (1) The 1<sup>st</sup> query sequence contains 14 A nucleotides, of which one is predicted to be for the m<sup>1</sup>A modification and it is at sequence position 21. (2) The 2<sup>nd</sup> query sequence contains 19 A nucleotides, of which none can be for

m<sup>1</sup>A modification. (3) The 3<sup>rd</sup> query sequence is only 25-nt long, too short for the current platform that requires a query RNA sequence with at least 41-nt long. However, if using the same first two query sequences but checking on the 3<sup>rd</sup> button “m<sup>6</sup>C”, you will see the following: (1) The 1<sup>st</sup> query sequence contains 2 C nucleotides, none of which can be for the m<sup>5</sup>C modification. (2) The 2<sup>nd</sup> query sequence contains 5 C nucleotides, of which none can be for m<sup>5</sup>C modification either. All these results are fully consistent with experimental observations.

**Step 4.** Click the [Supporting Information](#) button to download all the Supporting Informations mentioned in this paper.

**Step 5.** Click on the [Citation](#) button to find the relevant papers that document the detailed development and algorithm of the current platform.

**Supporting Information S2. The benchmark dataset  $\mathbb{S}_{\xi=20}(\text{m}^1\text{A})$  for m<sup>1</sup>A modification in RNA.** It contains 6,366 positive samples whose centers can be m<sup>1</sup>A modified as confirmed by experiments, and 6,366 negative samples whose centers cannot be m<sup>1</sup>A modified. All the sequences included are 41-nt long with the adenosine (A) located at the center.

**I. Positive subset  $\mathbb{S}_{\xi=20}^+(\text{m}^1\text{A})$**

>P1  
GGGCCAGGUGCCUGAGAUUGAUGUCCAUCCUACCUGCCUG  
>P2  
CUCGCCGCAGGUCUGGCUGGAUGAAGGGCACGGCAUAGGUC  
>P3  
CCCACAGCUGCUGGCGCCCGAGACCGCCUGCGCCCCAACG  
>P4  
CUCCUGCAGGAACUUGUAGAACUCGGGGUCUCUGUCCUUCA  
>P5  
UAGCUCGCAGGCACUGCCGUAGGUGACACCGUCGCUGCCAC  
>P6  
ACAGGGCUGGUGGAGAAGUCAGCGGGGACGUGGAUACCUU  
>P7  
UUUUGGCGAGUAAAGGCCAUAGCGAGAAGGAGGUUGCCGAC  
>P8  
GCACCCGGGGCUCUUGGCGCACCGCGCAGCGUGCCCGCG  
>P9  
CUCGAGCGCUCUCGUCGCUGAUCUCUGUAGUAAUGACUUUU  
>P10  
AGCAACUUCUCAUGAGGAGAAUUUACGGAAGCAGGAGGAG  
>P11  
CUGAGCGAUCUCCCGGCCCGACAUGCCUCCGUCAGCCGAG  
>P12  
CAGGGUCACCAGUGUGUGAAAGAUCGGGGCAUGCCGGCCAC

>P13  
CUCCUGGUCACUGGCCAAACACCCAUCCUCACCCCAGCCAC  
>P14  
GGGGUGCGUGACACAGGAGGAUGAGUUGAGCUGGCUGGUGG  
>P15  
GACGUGGAACAAGUCCCCAAAGAGCGUCCUUGUCAUCAAGA  
>P16  
UCCAAAUGCGCACGAGGAGGACACUGCGGGGGCACCUGGCC  
>P17  
ACCGAGCCUCGCCGGCGCGCACCUUGCCCAGCGCCCGCGG  
>P18  
ACAAGACUCAUACUCACUGAAGAGCAUCUGCCCAGGGCCG  
>P19  
UCACGGGAAGUUGUUAUUUAAGAUGGCAGUUAUUACGAAG  
>P20  
CUCCUCCUCCACUCCAGCCACUCCUCGCACCUGAGAGGA  
>P21  
GACCUCUAUCUAACCCGCACAAUCAACCCGGCUGAUGAUCU  
>P22  
GCUGCGCCCCGCGCCUGCAGAGCCUCAACCUCACCGGCAAU  
>P23  
ACUUUGAUCCUUUCUUGCAAACUUGCUCCUGUAGAAAUCA  
>P24  
CUCUCUCUGCAGCCGCUCAAACUCCUCUCGAAUUUCAGCAG  
>P25  
UCAUGACAUCUACAGGGAUGACCGUCUCCAUUUCCUCUGCU  
>P26  
UGGCUCAGCGCCGCGGGCUCAGGGGCCCGGACAUCGCGCAG  
>P27  
CUGCAGCUGGUGGGCUGCUGACAUGGGGGGUGGGAUGGCC  
>P28  
CUAACAGCCACAGGCUCCCACAGCGCCUGUCCCCACACC  
>P29  
GACCGAGAGAGAGAGAAAAGAGACAAAGCAAGAGAGAGUGA  
>P30  
UUAGCGCCCCACCGCCGUGGAGUUCGUACCGCUUCCUAGA  
>P31  
CGCGCCCGCCGACAGGAGCGAAGUCGCCUCCUCCCCGCGGC  
>P32  
AUCAGAAUACUGGAGACGAGACCACGAGAUUGAUGAGUUUG  
>P33  
GGAGCAGCCGUUCCGCAUCGAGCUCAUCCAGGGCAGCAAAG  
>P34  
GGUCACGGUGGAGGGAGAGGAGCUGAACCACGAGCAGGAGA  
>P35  
CAUCCAAUGCAGGGUCGGGCAGUGGUUUUAAUGGAGGCUUU  
>P36  
CCUCCUGCUGGCUCUCGCCCACCAACCAAGUGUUACAAGCC

>P37  
AGCAUGGUGGGGACGGCUGGAGGGUGGAGGAGCUGCCUGGA  
>P38  
GGGGUGCGGGUCUCACGCUCACCGCAGCAGCAGCACCACCU  
>P39  
GCUCGCCCCGCCUACUCCUUACGCCUCUGCUGCCCCGCGAC  
>P40  
CUCAGGCGGCUGCGGCUGCUACGGCGGCAGCAUGCUAGGGGA  
>P41  
CGAUUGAGGAAGAGCGAGCCAGCGCCCGGAGCAAGCGGAGC  
>P42  
UGCACACGGAGUACAUGUAGAUCGGCAUGUCAUUCAUGAUG  
>P43  
GCGAGCGCGGUGCUUUUGGGAACGCGGGACGGGCGAUCUGC  
>P44  
GCAGAGUCAGCUGCAGCGUGAGCAGGAGGAGCUGCUGGCCC  
>P45  
GGUGCAGACGUUGCGAGGCGAGGUGGCUGACCUGGAACUGC  
>P46  
GUCACCAGACUGCCGUGAGGAAACAGUACCCGUGCACCCGCC  
>P47  
AGGUAGGCAGCUCUCAUGGCACAAAGAGGCAGGCCGGGGU  
>P48  
GGCUGACGUCAGGAGCCAAGAUGGCGGCGGUGGUCGCCUC  
>P49  
AGGCGGAGUAGGACGCGGACAGCAGGGGCCGCACAGCCACC  
>P50  
CUCGGUGCCGUCCUGCGCAGACUCUCCCGUCCACGGAGGC  
>P51  
GCAGGCGCCUCAUUAGGUCCAGGCACAGUCCAGCUGCUGA  
>P52  
GCGGGUGGGGAACAUGUCUGAGUCGGAGCUCGGCAGGAAGU  
>P53  
UAAAGAAGGUAAGUGAGAAAACAAUCCUAAUCCAAAACCA  
>P54  
GCCACAAAGCCCUGGAGAGCAGAGGUAGCCACAGGGACAAU  
>P55  
GGCCGCAGGACCGGGCGCGGAGCCUCGCAGGGUCGGGCUCG  
>P56  
UUAUCCCCUCCCCGGAGGAAGCGGCGCCUUCUCGGUAGC  
>P57  
GGACGAGGAGGACCUGGUGGACUCGCUCUCCGAGGGCGACG  
>P58  
UCUGCAGCUGCGUGGAGGAGAGGGGUGGCGUGCCGGGCUGC  
>P59  
CAGCCGGGCCCGUGAGAAUCAGCGCGAGGCGCUUUGAAAAC  
>P60  
UGAUUCUGUGUUUGGCCCAAUGCAGCCUGUCCUGCGCUUC

>P61  
ACCUAUCAAACCUUCUGAGAAAUGACUCGGACUCUUCGUG  
>P62  
GGUAGAGCGGCUUGGGGAAGACCCUUUCCUAUGCUUGGAUG  
>P63  
AGAAGACUAUGAGAAAGUGAAGUUGCUGGAGAUCAUGGCAG  
>P64  
GUUCGCGCUUCUGAGCGGCCAGCUCCGCCCGCAGCGAGG  
>P65  
GCGCCGCGCCGGCCCGCCUCACUCCCCGAUUUUAGCCAAG  
>P66  
UGAGAGAGUCCGGGAGCCCGAGCUUGAGGUGAGAAAGGUUC  
>P67  
CAUGAGGCGGACAGGCCCCGAGGAGGAGGCCUGCGGCGUGU  
>P68  
CGCUCAUGCUGGGGUAGACAGACGGGCCGGCGGGCAGAGG  
>P69  
CAGUUCAGUGGCACCUGAUUAGCUCCGUGGGCGCGUCCCC  
>P70  
CGGCGACGGCAGCGGGACGUAGGUGCUGGACGCGGGAUGCA  
>P71  
AGCCAUCUCUCUGGCCAAGACCACUUUCGACGAGGCCAUG  
>P72  
UGAGCUCAAUCUCCUCCUCAAGAGCUGCUCAGUGGUCCGC  
>P73  
UCUUCCUCUCCAGCUUAUCACACAGACUUUCAGCCACCAC  
>P74  
UCAAGGGGCAGCCAGCGAUCAUUGAUGGGGAGCUCUACAAU  
>P75  
CCUCCACCUCUCCUCCACCACCAGCAGCUGACUACCCAAC  
>P76  
CAGGCGAGGGGUUUUGGGGACGUCUGUCUCCGGCGGUGG  
>P77  
GAAGGUGCGGGUCUGGGGGAUAGCGGAAAACACAGAACG  
>P78  
ACUCAUGCCGUCGCCGUUGACUGGAACCAGCGGCAACUCU  
>P79  
UGAGCAGGGAGCAGGCUCCCAGGCAGGCCCCCAUGGCGGCG  
>P80  
GCAGCAAGACGGACUCGUGGAGACGCGCCGCCGCCGCCGCC  
>P81  
CAAGGGGAUCCAAACACAGAGAGAUCCGGCAGAGUGACG  
>P82  
CAAUGGAUGACAAAAGAAGAACGGAGUCCCAAGCCCUGC  
>P83  
AGGGCAUGAGCGGUCCAUUACGCAGAUUAAGUAUAACCGC  
>P84  
UGUCUCCCACAGUCCUCUGAGCCUUGGAGUUUAUGAAGC

>P85  
AAAAUUUUUAGCAGCCUUCGACGACGCAGUGGAAGAACGAG  
>P86  
UUGUGGGCUUCCUGGCUCACGGGCCCUCCACAAACUGU  
>P87  
UGACCUGCAGGUUCCGGGUGUAAGGUGCAGUUUCUCUUA  
>P88  
GCAGCCUUCUCCAAAGCCACUGUAAAGACUUGGUUAUGUU  
>P89  
GGCCAGAAUUUCCACCUCUAGGAGGUGGUGGUGGCAUAGG  
>P90  
AGGAUCCCAAGGCAACAACAUGACAAAGGUAGCAAUGAU  
>P91  
GCUUCUUCACUUACAAGUCAGCAUACACUUCUGAAAUGAG  
>P92  
GUUCAGUGGGGAGGAAGGGGAGAUUGAAGACGACGAGAGUG  
>P93  
GAUGGAGCUGCGGAGCCCUGACCAUCCCCGAGCAGAAUACC  
>P94  
UAAGGGAAGAUGGAGACAAUCUGGAGCAGCAGCGGCGCUA  
>P95  
UUUCCAAGGCUGUACAGACUGGCGGCGCUUUUCGGAAG  
>P96  
CGUUCUGAAGCGGCGGCCAGAGAAGAGUCAAGGGCACGAGC  
>P97  
AAAGUACACCCCUCCACCUCACCACAUUGGCAAGGGGGAGC  
>P98  
CGCUUCUCGGGCGCUGCAGCAUCUGGACCCGCCGGCGCCGC  
>P99  
CGGGGCGAUGACCCCGAACCUGGACUCAGUCUCGACUCCA  
>P100  
CCAGCCUCGGCCGUAAAGUGAAGAGACCGGACCAGCUUCA  
>P101  
CGCCAAUACUGACAUCAAAAGAACACCACGGGGUUAACAGGA  
>P102  
AAGAAACGGGGUAUCCCGAGACCCAAGCGGCUAGCAGAGGG  
>P103  
UCCCGCUCCGCCGCCGCGCAGGGUCCAACUCAAAACAGCG  
>P104  
UCCAUGUCCUCCUCUGGGCACUCCUCCUCGUUGCCAGCUC  
>P105  
AGAGCAGCCUCAGGGGGUCAAAUCGCCUUGUGGGGGUAG  
>P106  
AGAGCAGUGCUAGCCCCGUCUGGCGGCGACGGCGGCGGGG  
>P107  
CACCGCGGUGCGGACCCAGCACGCCUGGGCCGGGGCUGCA  
>P108  
AGAAGGAGCGGGAGAAACGCAGCCAGGACCUGCAGAAGCUG



>P109  
UGAGAACAACAACCGCUUUGAGGAGUAUGAGUGGUGUGGAC  
>P110  
GGAGAGUCAGCAAGGAAGAGAACGCGCAAUACCAAGAAAC  
>P111  
ACAAGUCUAGGUCGCCGUCCAGAGCGCCAUGGCCGCGCCCG  
>P112  
UGGCUGUGGACUCCAUGGCCAUCGUUCCCCUGAGGUGGCGA  
>P113  
UCCACCUCAGCCCUGGGAUUUUCUUCUCCAGACUCG  
>P114  
UCUCUCACUGUUGUUAGGGGAUCCUGAUGUAGAAACAGAAA  
>P115  
ACACGCGCAGGCCCCACUCCAGCCGCGACUCCGGCCCCUGC  
>P116  
CCUGUAGGGGUGAAAGGAGCAGGGACCGGCGAUCUAGGGGG  
>P117  
UCCUCCCCUCCUUGCAUGAUGGAAACACCAUGGCUGCGG  
>P118  
AAAGGUCACUUACCAGCAUCACUUGUCCAUUGGACAAGGA  
>P119  
GAAGCAGGGAGGGUCCUCCAACACCAGCACGCGGCAAGAGA  
>P120  
AGUUCUGGAGUCUAAACACAAGGCCGCCGCGCCGUUAGCG  
>P121  
ACUCAAGCCACGCUGGAGACAUCACCAACCUCGGCCCCG  
>P122  
CCCACGUAGUAACGCAGAUAAAAGUCACUCUCCAUGGCUC  
>P123  
AGGGAGGUUUCGAGCCCGGAAGGUCCGGCGCCAGAGCUAA  
>P124  
GGAAACCCUUCGAGAAAACAGCAACAAGCUGAGCUGCUGU  
>P125  
GCUGGAGUUCGUGCUCAUCCACCAGCGCUGGGUGUUCGUGU  
>P126  
CGAGCGGCCGGCCUCGACUACGGCGGCUACGAGCCCAUGG  
>P127  
CCGCUACCACGUCCCCUUCGAUAUCCACAUCGCCUCUUA  
>P128  
CCGCCACGUCCUGGGCGGCCAAGGUCUCCAAAUUGAUCUC  
>P129  
GAGGUACCGCAGUCUCUCCACCUGCUUUGAAACCAGCGCG  
>P130  
UCCGGGUUGGGAGAGACAGAGGAUCAGGCGAGAAGGAGC  
>P131  
GUCCCCGUCACUGACUCGGAUUUCUUGGUCGACAUCUUGA  
>P132  
GUUAAGUUACUUGAACUUUAUAUGGGUCUCCUGUAAUCCU

>P133  
AAAGCGUCGUU AACUCCUCC ACCACCACCGCCGCCACCACC  
>P134  
CGCCAGCGCUAGGCGCACUC ACCGCUCUGACGGGUGCAGAC  
>P135  
GCCUCCUGAAGUUCUUCGGC AGCGGCUUUCGUUUUAGACU  
>P136  
GCAUACGGGAGCAGCAGCUC AGGCUCCUCGGACGAGGAGGA  
>P137  
AUUAUAGACUGGCCAGGUAC AGAAGGCAGGUUGGCUGGCCA  
>P138  
CCGGUGAGGGCGGCGAGAGG AGCCCGCUACGAGUGCCCUA  
>P139  
AUGAGGGGUGUUUUUUGGG AGGGGAGGGGCGGGAUUUGGG  
>P140  
UCGAAACUAGGAGAAAUAAG AAUGGCUGUAGAGGAACUUCA  
>P141  
GCGGGCACGCCCCGCGGACC AUGAGCGUCCCCAGCUCCGGG  
>P142  
AUGCUGGCCUUAGCCCGUGC AGAUCUGGUAACCACCAUCUU  
>P143  
GGAAGACAAUGACUAAGCAG AAUCGUAGCCGAGAAAGUGC  
>P144  
CAAGUACUUGACGGCGCGAA ACUCCUCGCUGGCUGGUGCCG  
>P145  
CAAGACUGCGAGCUCCCCGC ACCCCUCGCACUCCCUCUGG  
>P146  
GCAGGCGGCCUGGCCGAGGA AGUCACGGGAGAUCGAGGGCU  
>P147  
CUAGUUUGAGGAAGAAAUG AAGAAAUUGGAGGAGGUGCAG  
>P148  
CCAUCUCCGCCGCUAUUACC ACUGAACCCGGACCCCUACC  
>P149  
UCAAAUAAGAUCAAAGUGUA AGCGGGAGGAGGGGCGCAGGG  
>P150  
GCCAGCAGGAGCGAGAGUCC AGUUAGAUCUGAGCCGGAGAG  
>P151  
CGACCCGCAACAAUGAAGGG AAAAGAGCGCUCGCCAGUGAA  
>P152  
GGGUGGGGUUUCUUCGCAUCUCCACGGUUCCAACUCCA  
>P153  
UCCCCGCCAGCCCGGCCCGC AGUCGCUCCUCCAGCCUAGC  
>P154  
GUCCGUGGAAAUGAAACUGA AAGUCGCCGCUGCAGCUGGAA  
>P155  
UCCGCAAGAACAAGCGUCGG AGGGGCUGUCCCAUUCUCUGA  
>P156  
GAAACUGAUCCUUGCUGAAG ACGAUGAGGAGGCAGGUCUUC

>P157  
GCGCAGGAGGAGCCGGACAAAGAGGGGAAGGAGAAACCUCA  
>P158  
CUCCCACAGCUCCCACGGUAACUCGAGGGCUCCUUCUCGUC  
>P159  
CCUAAAUCUGUCCAAAGCAGAGGCAGUGGAGCUUGAGGUAA  
>P160  
CUUGCCUGAUCUGAACUUGAAGCAGCAGUUUCAGGUGGUAA  
>P161  
CGCGCGUCGGACCGUCCUUCAGUCCAUCAGGCGCACGCCU  
>P162  
GCCGGAGCUGGAAGAGGAGGAGGAGGAGAGGGCGGGGAA  
>P163  
CUUUAUUCGGGCAUCGCGGACGCCGGUCUUAAGAAAGCAG  
>P164  
GAGAGCGGGAGCAGCUGCGGAUCCCUUAUGAAGUGCCCGGA  
>P165  
GAUGAAGGACGGCAAUGGGAGCGGAAGAAGGUGAGCAGCG  
>P166  
UUCACAAACUACAGGGAUCCAACACUGGCCCGGAAGGCCCU  
>P167  
UGGGGAGGGGUCCGAUAGAGGAGCCCCACUCUCUCCUCC  
>P168  
CGAAGAUUCGCCAUGGAUGAGGAUGGGGACGGUGAGGACA  
>P169  
ACCAGUACCACAUACCCAGUAGGUAAUAAGGUGUCCAGCAG  
>P170  
CAGCGACCGGGUGUCCGGGGAGCGCCACGGCGCCAAGGCUG  
>P171  
UGUCGGGGUGGACCUGCUUCAGCACCUUGUACACGUAGAUG  
>P172  
CGGGGAGUGGGUCUGGGUGGAGGGAGAGGCCCCCGCUGGUA  
>P173  
AAAACUCACUGAAGAGCUGGAGGGUGGCAAGGAGGAGGCA  
>P174  
CCCUCSCCGACGGCGAUGGAGGUGGAGGCGGUGGUGGAGA  
>P175  
GAGGGCGCAAGGGGCGGGGAGCGGGCGUGCGUGUGUGUC  
>P176  
UCGGAACUGGACAUCAAAAACGAAGACGAUGUGAAAUCGU  
>P177  
GCCACUGGUUAAGAAGGAUAGUCAGGAAUGUUUUUACCAA  
>P178  
ACGGGGGUGGGGUGGGGAGACAGGUGUCCUUCUAAAAUAC  
>P179  
CUCCACUGGGCUUCCACAAAGGCAAUGAUGCGCAUCUUGU  
>P180  
GGCACUUGGCCAGACUUGAAGGCCAUGGGGCAGAUGGGGC

>P181  
AGGUGGGGCAGAUAGAAUGGAGAUGGCAAAGAUCUCUUUGG  
>P182  
CCCCAGGACAGUUUUACCGCAUUCGUGCCACUCCCGAUUCC  
>P183  
GGACGUGCACCCAGAGGACCAGGCGGCGGUAAGAAAAAGCG  
>P184  
CCCGAUUUUGAGAAAGGCUGAGUUGCAGGCCAGGUCAGGG  
>P185  
CGUCCGCCGCGCCUCGGCCAAGGUGAGCUCGCCCCGGCCCA  
>P186  
UAAUGGCAGCAGAACCACUGACAGAGCUAGAGGAGUCCAUU  
>P187  
GGGCGGUUGGUUAGAUGCGUAGCGGUAGUAUGCGAGCUCA  
>P188  
GUGGCCUGGCUCCAGGGAAAGGACUCAGCUCAGGGCAGGG  
>P189  
GACGGGGAAGGAAGAUGGCGACGUCGGGGGCGAACGGGCCU  
>P190  
AAAGGAGAAAAGGGAAAAGCAGAAAGGAAAAAAGGAAGAG  
>P191  
AGGAUCCAGCUGGUUGAAGAAGAGCUGGACCGUGCUCAGGA  
>P192  
UGAGUACCUACGCUAUCAGGAGGCCUGAGUGAGCUGGCCA  
>P193  
GCCCCCAUCUGGUCGGUGGAGUCUGAUGACCCUAACUUGG  
>P194  
GGCAUCCUGAAUUCACGC AUCUGCUGGAAACGAGCCGUG  
>P195  
AGGACAGGGAGCCAGCAGGAAGGUGGAAGGAGGGCAGGCCA  
>P196  
CUCACACUAAAACGGCGUAG AUGGCAACCCCCACCCCCAC  
>P197  
CCCUACCCUCCUCCAGGACAUGAACAAAGCUGAGUGGAGGC  
>P198  
CCGUAAAUGAGCGAGUCCAGAAAGCCGCCGCCUCCAUIAC  
>P199  
UGGUCUGUACUACAUCAACAAGAUCUCCUCCACCCUGUACC  
>P200  
CACCACCCCGCCAGCCCACG AUGUCACCUCAGCCCCGGACA  
>P201  
ACCCUCCCCUCUUCUCUAGACUUAUUUCAUCCUCCCGC  
>P202  
CAUACCACAGUGGAUGAGGACUGGCUCGCGUGUGGGCGGG  
>P203  
GGUUCACCAGUGCGCGCCCACGAAACGGCAAAAUGUCCC  
>P204  
CCACCCUCUUGGUUAACCCUACUUCUCCUCCUCCUGUCCAUG

>P205  
CGUGGGCGCGCACUGGUGGAACCAGCAGGUGAGGUCAGCCG  
>P206  
UGUAGGUCUCCUGGCCGUGCAGCGUCCGGCCCGUACGAUAC  
>P207  
CAGCCGCAUUGACAGGCUGGAUCAUGUUACAGCCACCGCCA  
>P208  
GAAGGAAGACGAAGUGCGUGACCCGACCGGCUGUGGUGUUC  
>P209  
GGCUGGAGCUGGUUGGUCCC AUUUGCUGCGGCGCCUACAUG  
>P210  
GGACCGACCCCAUGGCUGAGAAUAUGACGGCAAGAGGAACA  
>P211  
ACAUGCGCAGCAUGAUGCAGACGCUUGCCCAGAACCCCGAC  
>P212  
GCGGCGGCAUGGCCGAGCCGAGCGGGGCCGAGACGAGGCC  
>P213  
CCUUGGGGCGCAGCAUGCCUACGGUCCUAACCCUGGGCUU  
>P214  
CCCGGUCACAGGCCCCUGCCACCCACCACUACCGCCAACAC  
>P215  
GGCGAUGACCAGAGCCGGCAAGGCGGGGCUCCUGAUGCUGG  
>P216  
CACAGUCACCACCCACCCCAUCAUCAGCAUCAAGUCAGAAC  
>P217  
AGAGCUGGAGCGCGAGCUAGAGGCUCUACGCGUGGCGCACG  
>P218  
AGGACUCUCCUAAACGUCCCAGGAGGCAGAAAACCCUGAA  
>P219  
UGCUAUCAAGGCUGCUGCCAAGAGUGCUGCCUGCAGGUGA  
>P220  
CCUGAGCUGGGCCAGCAGGAAGUGGCGGCAGCAAGUCCGGC  
>P221  
GCCUAGUGAUCGAUACACUGAAGGAGGUAGAUGAAACUCGU  
>P222  
AUGAAGAUAUAGCCAAAACCAUUCGCAGGGUCCGAUCCGGA  
>P223  
UGCUGGGGGCUCAGGUACGCAUUGC UUCCAGAAUCCUGC  
>P224  
AGAGGUGUGGCAAGCAGAGCACCU CAGAACUCAGGCGUACU  
>P225  
GCCUGGGCUCUCACCAAUGAAGAGAAUUGUCCUUUAAGCCA  
>P226  
GUCCCGCGCUCGCUCCGAAUAUAUACCCUCAUCCGGGGGGC  
>P227  
ACAGACAGAGCUC CCCUGCCACUCCAUGAGGCGCUGCUGCC  
>P228  
AGGCGGCCAAGAAGAACUUAAGCGAGGCCCU GGGGACAAC

>P229  
GAUUUAUUGCAGACUCAAGA AUGAACAAUCCGUCAGAAACC  
>P230  
GAGGUUGGCUCGGCUUGGGG AAGAGGCUUCUGAUCUCUCCG  
>P231  
CCAUCCUUGCCUCAGUUUCA ACCCCAGCUUCUGUCACCAUU  
>P232  
CUUACACGACAAACGCACGC AUGGACCACUGAAUCUCACAC  
>P233  
GGUCCUAAAGAGCAAGCCUA ACUCAAGCCAUUGGCACACAG  
>P234  
GGGAUCCGCCGCGGAGCAGG AGCCAGAGCUGUGGCCGGAGC  
>P235  
GCCUGGGCUGGGAGGGAGAG ACCGGAGCAGCGCCAGGAGCC  
>P236  
AGCUACAGGCGGCGGGCA ACAGCGACUCCGACUCCUCCC  
>P237  
GAGCUCUGUCCAUCUCUGAA ACAUCCCUGGGCAGUGUUGA  
>P238  
GGCAGAGAGGAAGAGGAGGG AGAGGAGAGCGGUCCGGAAGC  
>P239  
CAUAGCACUCAUUCUAUUUC ACACAUCAUUUUUAACAAUGC  
>P240  
UAGGCCUGGUCAAGUUCAAG AACAGCAGGCCAUCCAGACA  
>P241  
CGCUGCCCACCUGCGCCCUG ACUGCUCCGCGCACCCACACC  
>P242  
AGAUA AAAAGUUGGCCAGCUA AACCAUCCUCCUCCUCCU  
>P243  
CGCCGGGCCUGGAGGCCG AACUCAGCCCGCAGGUCCAGG  
>P244  
CCAAGUAGGAGCCACAGCC AGGCCGAGCAGAGUGACCAGC  
>P245  
CGGCGGCGAUCUCCGGGAGC AUGUCGGUUCCCUUCCCGUGG  
>P246  
AGGCGUCGGGAACUUAGAAG AGCCUGCUUGCGAUCGCCGAG  
>P247  
GGCGGGGAAGGAGGUUCCCU AGUCGGCUCGACGCUUCAACA  
>P248  
AUGACUGCUUUUGCCACCAC ACCACCCAUUUCGUCCAUACC  
>P249  
CGGCAUCUAAAGCAGCUUCU AACAGAGAGAGAUGCUC AUG  
>P250  
CGAUGGGACCGCUGCUGCCG AACCCCGAGCUGCUGGCUUCU  
>P251  
CGCGGGAGGGCGUCUAGGGA AUCGAGGUGCCGGCUGCUCCU  
>P252  
AGCUCCCGCCCCUUCAUAGC AAUUCCUCAGCCUUCUCCGA

>P253  
UGGGGUGGCCUGGGGAAGAGAGCACAGAAGCCAGGGAAUGU  
>P254  
UCUGACUAGGCUAGUCGAGUACUAUUCGGGUCAUGGCGUC  
>P255  
CUGAGAGAAAAGUCGUAGAAUGCCUCCAAGUUCAGCAGAA  
>P256  
GAGGCGCGCUCGGCACCCGCACCCCGUGCCCCGCCUCAG  
>P257  
UGGCGGGAGGGCACUGCGGCAGCUUCCCCGCGGCGGGCC  
>P258  
GACCCCAAAGAAGAAGAUGAAAUGGUAACUGGAGCCGUAG  
>P259  
CUUUGCAUCCCCUCAAACCACUCUGUGAACUGCAGCCUGG  
>P260  
UGAACAGCCACUCUAUUGUAAGGACCAAGGAAUCCUCAGA  
>P261  
CACCGGCUUCACCUUCACCC AUGGUCCGGAGAGCCUAGCGG  
>P262  
CAUGC GCGGCCAGGCGACAGCCCCAGCGCCACCGCGGU  
>P263  
GGUGGAGGCUGUCGUGGGUAGAGCCGGAGGCCAAAGAGGA  
>P264  
GGGAGGGGGCGGAGAGGCCGAGGCGCGGAGCUGGUCCCCAG  
>P265  
UUACUUUCCACUCUAGGCCACGAUGCCGCAGUACCAGACC  
>P266  
CCUCGUGCCUGGCCCCACCACCCAUCUUAAGUGGCAAAG  
>P267  
ACGAACCCUCAGCGAGGGACCGGAAGUAACGCUAGGGGA  
>P268  
GGUAAAGCACCCAGGAAGCAACUGGCUACAAAAGCCGCUCG  
>P269  
AGCUGCCGCCAAAGCUCCGGAGCCCGACGCCACGACCUAG  
>P270  
CUGCCUGCCUCCUGGCAGGAGCGCGGCGUGGGGCUCUCAG  
>P271  
CCUCAGAGGCUGCUGCUCCAGCCAGGCGUUGGUUUUGCUC  
>P272  
UACCCACCUUCAGGCAGCCU AUGGGACGCAGGGCCCCAUCU  
>P273  
AAAGAAAAAGAGGAAACACAAGAAAGAGAAGAAGAAGAAAG  
>P274  
AACCUGCAACCCGCAACCCGAGACCCGCUACCCACUACCGU  
>P275  
GGUGGCCAGGCCAGACAGAGGUGACGUGGUACAAGGACG  
>P276  
AGAAACUGAGCUCAGCUCGAAAGUGCGAAUGGAGGCCGUG

>P277  
CCUCAGAGAUGGAGACAGACACAGCCUGAGGCAGGACGGGG  
>P278  
CCUCUGCCAGCAAACGGCGAAGACGCUCGAACUCACCCAGC  
>P279  
GUUGUUCAGGUUUAUCUUCUCAUCUUUCACUGGCAGUGCU  
>P280  
GAGCGAGUACAUGAAGCGCUACCAGGAGCCGCGCUGGGAGG  
>P281  
AUGGGGUGGCAGCGACUCCUACUGCUGCCUCGGCCUCCUGC  
>P282  
CCCCACUGUCCGACAUCGCCAUCGCCAUUUCUCUCCGGGUC  
>P283  
UCCGACCCACCAUCUUCUCUCAACGCUGAGCGUGGACGGU  
>P284  
GAGGAGGAGGAAGAAGAAGAAGAGGGAUGAAGAUGAUGAUGA  
>P285  
UCCCGGCGGAGAGGGAGGGGACCUGCAAGUGCGGAGACUGA  
>P286  
GCAACGACUCGCUGCCGCCCACGCUGACCCCGGCCGUGCCC  
>P287  
CGGACCCUCGGGGCCGGGGACGACGGGCGGCCAGGCGA  
>P288  
UGGAGGAAGCCAGGAGGGAGAGUGCAAUGCCGAGAAAGCAA  
>P289  
UACUUUGUGAUUAUCAGCUUUAAGGUUUGGAUUCUCUGCUGC  
>P290  
CGGCGGCAUCCUCCUGCCCACGGCGAUUGCGGCCGCCCC  
>P291  
AGAAGAGGAAGUGAAAAAAGAGACGGCUCAUCCCAAUGAAG  
>P292  
GGAAAAGUUCGCAACCGCCAAGAGGGGAAACGGGCUGCGCG  
>P293  
CGCCGAACACCACCAGGUGGAAAGGCCUCUGCUCGGUCGCC  
>P294  
UGCGGGCGCAGGAGCCUGAGAGCGGAGAGCAGGCUGUGGCC  
>P295  
ACAAACACCAUUUCUGAGCAGCGUUGUGCAUGCUUACGGC  
>P296  
CUCCCCUCUUUAGGUGUGCAGGUGACAGGGGAAGGCAGUA  
>P297  
GGAGAAGCGGCGGCAGCUGGACGCGCGCCGCAGCAAGUGCC  
>P298  
UUCUCAGACCAAGAAGAAGCAGUGGGUAAAUACCAGUCUUU  
>P299  
GCAUGGCACAUUACAACUUCAGAAAAUUACGGUGGUGCCG  
>P300  
AAGUGCUUGGGCUUCAUAUCAACACGUGUCUAUCCGCCUC



>P301  
CCCGUCCACAGUACCUGAUCAGCCUCCGGCCACAGACAACC  
>P302  
UGCAAACCCGGGAGCGGCUCACUUUUCAGGACUGAGCAGGA  
>P303  
GGCGCAGGGGCUCCGUGACCACCCUACGAGGCUGGGAGGCG  
>P304  
CCAGCAGCCCAUUCUGCGGCACAGCUCACUCCUAGAGACA  
>P305  
CCUGAACGGGGAGGUGGGCGAGAGGGCUUCGUUCCCCGCCA  
>P306  
GAGGCCAAAAGACGAUAUCAAGCUCACUGCCAAGAAGGAGG  
>P307  
GGCCCCGAGCCGCGGGAGUCGAGCGAAGGCAGCGCCGAGGCC  
>P308  
UAAUCCUCUUUCGAGACUAAGCUCUUUUUGUAUGCGUGU  
>P309  
UUUUGACAGGGCUGCAGAAGAUGUGAGGAAGCUGAAAGCAA  
>P310  
AGGACAGCGAGUCUGCGGCCAGCCAGCAGAGCCUGGAACUG  
>P311  
GUGCAACCACAAGCUUCGGCAGAACGCACUCCAGCUGCCCU  
>P312  
GGCCAGCGAGAAGUCCACCGAGUCCUGCAGGAGCCGCACCC  
>P313  
GAUCGUGCGCUCGCCGUGCAACCCCCUCUAAACUAUGAAA  
>P314  
CGGCCCGGGGAGGCAGCCGCAUCCCCCGGCGGGCCCCG  
>P315  
GCGAUGGAUCCACCGCGGGAGCAAGAAGGAGCCUGGAGG  
>P316  
UCCCGCCGACAGACCUUGGGACCGGGGCAACACUGGCAGC  
>P317  
CCCACUCCCGACCCGGGGCUAGCGUGCGUCCUAGAGUCGA  
>P318  
AAUGACGAUUGAGGAGAGGAAGCAGCUCAUCACUGUGAGAG  
>P319  
GUCAGGCUUUUGAGUUGCCCAGGAACUGUGGCCAAAGACCU  
>P320  
GCCCCAGGUGUAAGCGCAGAAGCAGGCGAACCCGCGGCGC  
>P321  
GCGACGCCGGGGGGCCGCUCAGCUCGCAUGCCCGGCCCGGC  
>P322  
AGACGAAGCCCCGGCGAGGAAGGUGGGCGGAGGCGGCGGCG  
>P323  
GACUCCCAUUUGGAUGCACAAGGAAGAAAUUGUUCAGUUC  
>P324  
CUUUUAAAGGAGCAGUGAGGAGAAUGAAUACCUUCCAAGAC

>P325  
GCGGAUCUCCUCCACCGACCACGGCCGCUCCACACGGGCU  
>P326  
GGUGAGAGACCCGGCAAUGGAUCGAUCACUGCGUUCGUGU  
>P327  
CGCCGCCGCCGACCCGGGCAGCCCCUGGCCGCCGGCA  
>P328  
CGUUCUUCUCCCGCCCGCUCCAUCCGGGUCGCUGACGGCUGU  
>P329  
CGCGGGGUCCAGUUCAAGAAGGGAGAAGUCGUUUGCCUCG  
>P330  
UAACCACCCAAACCAUCAGGAGUACCAUAUCCUCCACUGUA  
>P331  
CACAGCUGUAGAGAGAGCAAACUUGUUAACAUGGCUAAAC  
>P332  
CAGCUCCAUAUGUCCCCCAGAGGAGUUUCCAGGCAUUA  
>P333  
AAUCUGAUAAGACUGAAGAGAUAGCAGAAGAGGAAGAAACU  
>P334  
CUGGGACCCCAUCUCAAAUCAGGCACUGCUGGGAAGAAAGA  
>P335  
UGCGUCUCCUCAGCACGCGACGGACUCGCAGGCCGCGAGA  
>P336  
GAGGCAGCCACCUAAGGUGGAGGUGGGGAAUAGUGUUUCC  
>P337  
AAUCGGGCCCCUGAAGCUGAGCGACAUCGGCGUGGAGGAC  
>P338  
AAUGAGUUCUGAAUCCAAUAACAAGAUGACAUCGGUGUG  
>P339  
AGCAGCCAGUCAGGGCCUCCAUUACAUCACAGUGGGGCUCC  
>P340  
CUCCAGGACAGCGGGGAGGUACCAGAGGACCUUCGUCUCC  
>P341  
GGCAUGGGCUGGCCCGGCACAGGGGCCCUUGGUAUGGCGG  
>P342  
GAAGGGAAACUGCGAGGCGAAGGUGACCGGGACCGAGGUA  
>P343  
CGACGUGAGCGAGGGUGCUUAGGGAGAACAGCCGCUGGCAG  
>P344  
AAGAGAGCAGCGCGCAAGCGACGAGAGCAGCGCCGCAGCCA  
>P345  
CCGGCUGGGGGUGCGCGGGGAUCCCCGAUUCGCGCCCGGG  
>P346  
GUCGCUGCAGCUGCCGGGAAAGAAGGAAACGACGACUCCGG  
>P347  
CAGCCUCUUCUCCCCAUCAGGGGCAGUGCCCACGUCUUU  
>P348  
CAGCAAUGCUCGUUGAGAGACGCGGCUUUCGGCAAGAACU

>P349  
CCGUGCCGGAGGGAGGAGGAAGAGGAAGCCGGCGAGGAGGC  
>P350  
GGGGGCUUUUUGUCCUUAGCAUUGAGGAGAUUUUAGCUGAC  
>P351  
GCCCGGGCAGCGGCACCUACACCCGCCACGGCUACAUCUUU  
>P352  
CUAGAGUGCAGAUACUGCUCACUGGAGGCUGUCUCUGUGGC  
>P353  
GCCCAGAAUCCAGCCCAGAAUCCCGACCGCCGCGCCGGAC  
>P354  
CCCUAUCCUAGGACCCCAGAAAGAACGGGCGCCGCGCCCAA  
>P355  
CGACCCAGUCCGUUGUGGAGACGCUGGCCAAGAAGCGGCU  
>P356  
CCCGCGGCUCUCCUCUACCACCCGCGCCGUUCCCGGGCCC  
>P357  
GCCCUUGGCCUCCCCACUGCAGGUGGGCGUGCCACCUAUGA  
>P358  
CGGGGGCGCCGCUAGGCCGCAGCUCCGCCAUCGGGGUGCGU  
>P359  
UCAACUUGCGCAAAAUUGAGAGCAAGCCCUUCAACAACCAC  
>P360  
GGCUGCGACUGGAGGACACGACGACGUGUCGUUCAUGGAA  
>P361  
CGAGGACGAGGAGUUGGAAGAGAAGAGGAGCUGGAGGAGG  
>P362  
CCCCCGCCUGCGGAGGUAGCAGCGUUGGCGGUCCUCAGGC  
>P363  
GGCGUCUGCACCCAGCUACCACUAACCUCGCGCCGCGGUAC  
>P364  
GAGAAGCAAACCAAGCCAGCAGAAGCGCCCCGGCUGCAGCU  
>P365  
UUGUUCUGGUUCCUCAUUGAUGUCCAUAUGUUCUCUGAA  
>P366  
GGCACUGGAGCAGGUGGCGGAGGAGGGCAGGCAGCAGAACG  
>P367  
GGCCCCACCCGCCAAAUGAACAGCUCGGACGAAGAGAAGC  
>P368  
CGGGCACCGCUGCCUCCCCGAGUUACAUCGCCGGCGGCAGG  
>P369  
GGACUGGAUGAGGACAGAGGAGCUGGCCGAACAGCUGAUGA  
>P370  
GAGCGGGUGAAGAAAUAGAAGAAGUGGAAAGGAAAAAACG  
>P371  
UUGGAACAGAGGGAAGCUGAACUCCAGAAAGUGCGGAAGGC  
>P372  
CGAUCAGCCCGACUCCAAGCAUCAGCUGAGUGUCCGCCACC

>P373  
CAUCUCACCACUUCUAAGGCACUGGAGAGGGGAAAAGAGA  
>P374  
UCCCGGGGAGGAGGAAAUCGACUUGUCACUCCUGAAGUGU  
>P375  
CCAGUCCAGCGCGACGAGGAAGAGGAAAAAGAAGUCGAAAA  
>P376  
GCGGCUCCGGCGGCGCCAUGACGCGCUGGGUGCCCACCAAG  
>P377  
CCAAAGUCCGCCGAGGAGGAGCCGGCGCCGCGCUCACCUC  
>P378  
ACCCAGACCCGGCGAUGAGGAGUGGGCGCCGAGCGCAGGGGC  
>P379  
GCGAGCCCACGGCUGCGGCCACCGCCAGGAGGAGCAAGAGG  
>P380  
GCCGCGGCCGAGCGGGAAGGAGCGGGCGGGCGGCGCGCGG  
>P381  
UGCUGGGGGGUGGCCCCAGCACAGCCACCUCAUGUCCUCC  
>P382  
AAGGAUGAUUGUAGCUCACCACCCAGAGUGCAGGAUCAUA  
>P383  
AUCCUUGACCUUAUUCSCCAAGAAGCGGCCUCCCGGAA  
>P384  
CGGAAGCAAGGAAGGAAGGAGGGCUGCUGGAGCCCAGUCA  
>P385  
GCGGCCCGGGGUCCUCCUACAGGGUCUCCUGCCCCACCUGC  
>P386  
GGCAGGAGGCGAGGCGGAGGAGCCGGUGCUGAGCAGGGACG  
>P387  
GACCACACUUCAGAAGCCCCAUCCCCCUGCCACCGGGCGA  
>P388  
ACCCAACCCCCUGGGUCCACCCUCCUCAAGGCCUCCUC  
>P389  
UGCUGCCUGUGCGUCUGGCCACGGCCAUGAUGGUGCCCUAC  
>P390  
CCGUUGAGGAUGAGGCCGCUAGAGGCCUGAGGAUGAGCUGG  
>P391  
GGCGGGUGCAGCCAGCAGGCAGAGGGCGAGCGGCAGAAGGC  
>P392  
ACGUGCCCACCAGCUGCCGAAGGCCAAGACGCCAGGUCCGG  
>P393  
UGCAGCAGGACGUCACCAGGAGGGCGAAGCGGCCACGGGAG  
>P394  
GCCAGGCCCCCUUGCCGGCCACCCGCCAGGCCCGCGCCGG  
>P395  
CCUUGGGAAUCCUGCCACAGACAGGGGCGAGGGCCUGUGG  
>P396  
GAAGGUGACGAGGAGGGAGAAGACGAGGAUGAUGCGGAAU

>P397  
GGGGUCUGGCCAGGAGCCGCAGUUGCAGCCGCUGCUGCCGC  
>P398  
GCGGUAGCGGCGGCGGGAGGGGCGGCCUGAGGGCGGAC  
>P399  
GAAGCGCCACGGCUAGAGCCACUUCGGGCGGACCUCUCA  
>P400  
CCUGCUUAGCCAGAAUCUCCAAUAUUCUUGCCCAUCUUA  
>P401  
GGAGAAUCAGCGUGUCUGAAGGAACAGGCCUGCAGGAGG  
>P402  
CGCGCUCCGGGCAAAGGUGGAGGGGUGGGGGGCGUCACUG  
>P403  
CAGUUUUGCUGGAGGCCGCAACCAGGCCGCGCCGCCACCA  
>P404  
GUCCCAGUCGGCUUUACCCUAUCGACGCAGCGUCCCCACUG  
>P405  
GCCGUCGCCCGAUUCCGGAUCUCAUUGCCACGCGCCCC  
>P406  
ACCACAGCCAUGUGCUCGUUAGCGUCAGGCGCUACCGGUGG  
>P407  
GCCAUCAUCCAUGGAACCAGAGUGGGCCUUCUCAGAUUAG  
>P408  
ACUGGGUCUGCAGUGGCGACAGCCAGCAAGAGCAACGUCAC  
>P409  
UCUUUGGAGGGUGGGGCAGGAGUAUAUGAGCAUCCUCUCUC  
>P410  
UCCCCACAGCGCCAGCAGCGAGCCCAGCGCCAGCAGCCAGA  
>P411  
GGUCAGGACAAGGAUAGCGGAAACGGGCCCUUGGCUUGUCG  
>P412  
UCACCCCAACAACCCUCCCCACAUCCCAGAAUCCAUCAC  
>P413  
GAGGGGGGCCAGGUGCUGGAGGCCGACUUGGUGAUGGCU  
>P414  
AGUGC UCCCCUCACUGGUUAAGCGGUCACUCCCGCCUUAAG  
>P415  
GGUAGGGAAGGGACGAGUCUAGGCUGAGGGCAAGAUGGGAG  
>P416  
AGGCUGGCAACUACAGGCGCACGGUACAGCGGUGGAGGAC  
>P417  
CCCACCUGCUGCCACCUUCUAGGCUCUACCUCUGCUUCUCG  
>P418  
UCUACACCUGUUCGCGGGAGGUGCCGGGUCGGGCGCAC  
>P419  
UGGGGGCCUCGGCGCUGACCAGGGGUGAGCACGGGCAGCCA  
>P420  
GUGGCAGAGUAUCCAGCGUGAGUUAGAUGAAGAGGACAAU

>P421  
ACUACCAUCUCCUUCUCCAAGGCUCGCAACUCUGCCUACA  
>P422  
AUGCCAGGAGGGACUAUGAAAAGCCAUGAAAGAAUAUGAA  
>P423  
AGAUUCCCAACCUGCUGAGCAUCCGCACACCCACUCAGGAG  
>P424  
GCCCCGUCCCGUCGGGGCCGAUGGCUCCUCCGAGGCCCGC  
>P425  
GGGUUGGGUGGGGGGAGGGUAGUUGGGGGCUC AAGACUGGG  
>P426  
GCGCCAUGGCUCCCCGCGGGAGGAAGCGUAAGGCUGAGGCC  
>P427  
GAAGAUGAAGGAACGACAGGAGAGGAAGCUGGCCAAGGACU  
>P428  
GGUCCCCGCUGCUGCCGGGACUGCUC CGCGGCGAGCUGGG  
>P429  
CUGGCAGACCCAGUCAUGGCAGCCUCCAGCAUCAGUUCACC  
>P430  
UCCUCCUCCUCCUCCUGGUUCCACUACCAGCAUCUCAUG  
>P431  
ACGGUCAGAUGGGGGAAGACAGCUGGGUUCACUGGGCUGGU  
>P432  
GAAGAUGGGCAGAAAGCUGGAGCCCCUGGAGUUGGCUGUGU  
>P433  
CCAGGGUGUGCUUGUCAAAAGAGAUAUUCCGCCAAGCCAGAU  
>P434  
AUGUCACCCAGCUCAUGUCCACCGAGCCUCUGCCCCGCACU  
>P435  
GGACUGAGCACCUGUGGGGAAGGGAGGUGGGCUGAGAGGUA  
>P436  
CCACAGCAAGGGUAAUCCCCAGGCAGACCCUAAAAAGCC  
>P437  
CAAGGCCUGAACCUGGGGCCAGACACCUGCUCUCCCGGCC  
>P438  
UUUUCUCCGCAGAUCUCCUAGAGCACGAAAUCUGCUGCA  
>P439  
ACUCCCCGAGGGAUCUCCACAACCGCCGCUCUUCUCGCUCU  
>P440  
ACGGGCGGAGCCUGGGCUCUAGAAAAACUAGCCAGAAGGU  
>P441  
CGAGGUCCGACACUUCACUGACGGCAGCUUCCCCGCCGGCU  
>P442  
CUGAGGGCAGGGGAGGAGCGAGGCAGGCGGCCGGCUGCGGC  
>P443  
UGCUGAGGCCACCUUUGCCCACGGCUCCACUCUGCUCCGA  
>P444  
GUUGCCGCCUCCUGCCGGCAAGUGUGUGAAGAAGAAGCUG

>P445  
GGUGCAAGGCAGGCACAGGCAGGGGGCCUGGGGCGGAUGGG  
>P446  
CAGCUCUGAGAGGUCGCCAAAGCCUGCAGCCUGGCCUGGGC  
>P447  
ACGCGGAGCGGACGGAUUCGAUUCAACGGGGUCCGGACCG  
>P448  
CUGCCCACGCUGCACCCAGCACACCAGCGCCCUGACCCCC  
>P449  
CCACCCGCUUCUUGACCCCGAUCUGCAGCUUCCUUUUGCCC  
>P450  
CGCACCCGGGAGCAGCGGGCACCCUGUCGGGCGCUGACUCGG  
>P451  
CAUUCUCCUCAUAUCCCUCAACCGGCCUUUCGGCACCUGG  
>P452  
GGAGAAGGUGAGCGUGGAGAACUUCGAGCUGCUCUAAAGGUGC  
>P453  
CAUCCCGCAUGGCAACAGCAGCAGGCGGCUGCCGCAGCUU  
>P454  
GCCUGACUCGCUGCUGAAGAUGACCUUGGGGGUGUGACC  
>P455  
CAUUCUGAAGAAGAUGAAGCAGAAAGAGCGGGAGCUGCGAC  
>P456  
CCGGCGCUCCGCUCCGCUCCAGCUCGGUUUCAUGUCCCGCC  
>P457  
CGGCGCUGGAGGAGCUCGAGACGGAGCCUAAGUUAUGUCUG  
>P458  
GGCAGGCGCGCCCCUGGAGGAUGAGGCCACUCUGGGCCAGU  
>P459  
AGCCUCCCCACCAGCCCCUGAAAUGGAAAGGCCUCCAGGUA  
>P460  
GGACAGGUGGAAAGGGGCCAUGGGGGGCCACAGUGGGAAC  
>P461  
GUCCUUCGUGCAUCGCUGCCAGCGCAGUCACCACCACCCC  
>P462  
GGAGCAGAAAUCUCGAGAGGACGCUCUCCUGGUGAGAACGU  
>P463  
UCAGAGGCAGGCCCGGCUGCACAAGUCCUCCUGCUGGGCC  
>P464  
UAUUCAGGAGGCUACCAUUUAAAGUUUGCAGAUGAGCUUAU  
>P465  
GCCAAGCCAAGCCGCCUGCUACCUUCAUCACCAAUUGCAC  
>P466  
UCGCAUUAAGGAGGCCGCUGAGGCCGCGCGGCAGCGGUGGG  
>P467  
GUCGGGCGUCUUGAGCGAGAAGCAGAUGAGCGGGGAAGGGG  
>P468  
UCCCGGGACGCAGCCAUCUCAGGAGACGAGGGCUGGUGGGC

>P469  
UGGCGGGUACGGCGUCGCGCAUGUGGCGGAGCGCAAGUGG  
>P470  
UUCGUCGUUCGCCACCGCUACCGCCACUGCCGCCACUCCG  
>P471  
AGAAGGACCUGGCAGAGAAGAGGGUGAGCACCUGGGCAGCA  
>P472  
CCCAUGGGCUCUGCCACGAAGUCUCGGUGCUUUUGGGAGG  
>P473  
CCCUUGCCAGUUCCCUGGUGACAGUUACCAGCUUCCUGAA  
>P474  
GCCGCCACCUCAGGCCACUAUGGCGCCUGGGCUGCCCAGG  
>P475  
GUCAGAGGAGGAGCGGCUGAAGUUGGCUCAGCAGCAGGCGG  
>P476  
UCUUCUUCUCCUCAGCUCAUGAGUUCAGGGGUCUCCAUI  
>P477  
UCUCACCAACCCGGGGUCUGAGCCCCUCAUUCUGACCGUC  
>P478  
AGCUGGGCCACGGCCUGCUCACUGCGCUGCAGCUUCUGCUG  
>P479  
CUCUGGGGAAUGUGGGUUCAUCCAGGAUUGGGGGCCUCUC  
>P480  
GUGCCAUCCCAGCCAGGAGCACGUAAGUAAUGAAGGCCAUC  
>P481  
UGGUCGGGAUCAGCUUCUUCAUCCUGGGGCUGGGCACCCUC  
>P482  
UGUGGGUGACAGCAGGCGGAAGGCCUCACGGCAGUCCAGGC  
>P483  
CAGGCCACGGCCGCGGCCACAGCGGGUGAGCACGAGAG  
>P484  
GGACAAUGAUGAUGCAGCAGAGGCCAGUUCUGAGCCAACAG  
>P485  
CCUGGCAGUACGGGCCUGCACCGGUGAGAACCACCCAGC  
>P486  
GACCGGCCAGUGGGCGCGAGAAAGACAGCUGCUGAGAGAGA  
>P487  
UCACGUUGCCGCCCGUGACCAGGCACUUCAUGCUGCCCCAG  
>P488  
CUUCCUCCGUCUCCAAAUCCAAAUCAAACACGGCCGCCAUG  
>P489  
CAGCAUUGAUGAUGCCUUCGAGCUGUCCUGGAGGACGGGG  
>P490  
CACCUGGGGGCGGCCUCGCACACCACCGUGUCGCUCGCCC  
>P491  
CCCUGCGCCUCACGCCUCGAGCCCCUGCUGGCCCCGAAGU  
>P492  
ACCUCAACCUGCAGGGCCCCAACUUUGAGUUCUCCACGGAG



>P493  
GCUUCCCCUCCUGCAGGUCCAGGGCCAGGCCGUUGGGCCAC  
>P494  
GAAUGUUUGAAGAGUAGAACAUGUCCAUGUUGUACAGGGAG  
>P495  
UUGCCGUGGUGCACUUUGCCAGCCGCCAGUGGAAGGUGACC  
>P496  
GGAGAGCUUGGGAGCCGACGAAGCAGCCCCGCGGCCGCGU  
>P497  
UUGACAUCAUGCUUUCUGGAACUUCCCCGUGUGUCCACU  
>P498  
UCUUUCAGGCAAAGCACUAAAGGGCCAGUACCAGUGAGUGG  
>P499  
GGAGCAGGCCAGCGGGCGGCAGGCGGACCCCAGCCAGAGAG  
>P500  
GCCAGAACAUUGCACGCGACAGUUUCAGGCACAGAACUGAC  
>P501  
GCUUUGGGGGGUCCUCCUGAAGGGGCUUCCUUGGCAGAA  
>P502  
CCAGCUCGGCUCCCCGUUCGACUCGGCGCCGCGGCCCGGCU  
>P503  
GGUCUUCGGUUUGCACAGCUAGAGGCCGCGCAGCAGCAAAG  
>P504  
CUGUUUGACUACGUGCGUGCAGCCUCCCCUCGAUGUCGGCC  
>P505  
AGCACCACCAGCCCCACUACAGCCUCCGCUACCACCGCUUC  
>P506  
CAGGGGAGCGGGCUAAGAGUAGAAUCGUGUCGCGGCUCGAG  
>P507  
AGGCCAGGUUCAGGCUCUGAUGGUGGGCGCAGGCAGGCCG  
>P508  
GGGCUCCGUGGAAAAGGGAUGAGAGUCCAAGGGGGAAGG  
>P509  
GAUUGAGACGGAUGAGGAGGAGAGUUGUGACAAUGCUC AUG  
>P510  
CAAUUGCCACGGGUACUGGC AAUUGGUUUUCGGCUUUGGCG  
>P511  
CCUCUGCCCGGCUCGCGGAUCGUCCCAGUACUCCUAACA  
>P512  
GUGGUGAAGCCGGAGCCGCGAGAGAGCCGGGGAGAGGAAGA  
>P513  
GGGACUAAGCCAAGGGAUUCAGGUGUGGUGCCGGUGGGAAC  
>P514  
CGGCGACAAAGAGUCCCCGAAGGCGGCGGCGGCCGUGCC  
>P515  
GCGCUGCCACCAGUCCAGAGAGAACCGGCUCGUGUCACCCG  
>P516  
GGCGUCUGUAUGAUCUUCGGAAGCCUGCUGCAUCGGACCUCG

>P517  
ACUGCCUGAAAGCUAGCGGCACUGCCAGAGGCGACCACCGC  
>P518  
UCUCCUUGUCGGCGCCGCUGAUUCCCGGCUCUGCGGAGGCC  
>P519  
UCAACCGCGGCGGUGGCUGCAGCGCAGAUCCCGACUCCUCU  
>P520  
GCGCCGCCGCGCAGCGCCCCAGCCACACGCCGGCGGGCAGA  
>P521  
CGCUGCAAGUGCCUCGGGCCAUCCGCCAUGACCAUGCUGGG  
>P522  
UGGAGCCUUCUCCGAGCAGAUCAAUACAGCCCUUUCUC  
>P523  
GAGCUCGGGACCGGCCCAGGAGCAGCGGGUGGAGAUGGAGA  
>P524  
GAAAAGAGGCGAGUAUAUACAGCAUUUGCUGACUAUAGGCC  
>P525  
UCUCUCUCCAUCCUGCCCUAGGCAACUGCAGCUUCACCGA  
>P526  
CUCCUUCUCUUUCCUCCAGAAGCCAGGGAGUGACCCUGCAG  
>P527  
GAGCGAGCGACCGACGCGCCACCCGCCGACGCCUCAGCCGC  
>P528  
GUGUGUGGGAACGCAAUGUGACUGGGCGAGGGGUGACGGUG  
>P529  
AAGGGAGAGCCGACUGCGAGAGGAAGGCGACCUGGGUGGG  
>P530  
CAUUCAGAAACCAUGGCCCAUUUGUCCGUAACCUUGUGGA  
>P531  
GCUCCACUGGGGAUAGGGGUAGGGUCUGGGGAACGGGAGCA  
>P532  
AGGGCUCUGGGCAGCGGCUGAGUUCAGGUGCAUCUGGCUGG  
>P533  
UUGCCCCCUGCCCCAGCCAAGCCAAUGCACCCAGAAAUA  
>P534  
GGACGCUGGAAAGUCGGCCAAGAAAGACAAAGACCCAGUGA  
>P535  
GGGCGUCGCUCCAGCCCCAGAGGGAGAGAAGAAGCAGAAGC  
>P536  
UUUGCUCAGAUUGGUGUGGGAGAGCCUGCCUGUGGGGAGC  
>P537  
AGCGAGUCCUGAGCACCCUGAUGUCCUCGUGACCCCGGAG  
>P538  
GCGGAAUCGGGCCUCUAGGAUCUAGCUCUCCGGGACGUUC  
>P539  
CAGAGCCCCACCCGGCACCACACAGACCCACCCCGCCC  
>P540  
CAUGGCGCGGAAGAAGAUAAAGAGCGGAGAGCGCGGCCGGA

>P541  
CUGGCCGGCUUUCUAAACGAUCCGCGGGGCUCCCUCAGCC  
>P542  
ACCAAGUCCCAGUCUCCACAAGGGCACUGCCAUGACUCC  
>P543  
GGGGCUUGUGGCUCUCCAACCCACUCCCCGUUCAGCAC  
>P544  
GUCCCUGGUGCAGAUUCUGCAGCCACAGCGUCGUGUAGACA  
>P545  
CGGCCCAUGCCGUGCGGCAGAACCCUCCGAAUCAUAACCCC  
>P546  
UGGCGGCGUGGGCCUCCUCCAGUCCA AUUCGCGCUUCCUC  
>P547  
CCUCCCAGGAGGGCAGGGGCAUUGGGAAUGGGUGGGUGCCC  
>P548  
GCUGGAGAAGAAGAAGCAGAAGGAGCAGGAGCAAGGUGAGC  
>P549  
GCAGCCACAGGUAGACGAGGACAAGGACGACUGGGAAUCCU  
>P550  
CCGGCACCGAGUCGAGGCGGAUGCGGCGGACGCGGCUCCCA  
>P551  
CAGGCCCCACUUUGCCCUGAAUGGAGAGCUGAUUCCUUGC  
>P552  
CCCAGCGCCGCGGAGGGGGGAGGAGGAAGAUGGAGACCCAC  
>P553  
GGGAGGGGGGAGGAGGGGGGACGGAGGAGGGAGGGGGCCA  
>P554  
GCUGCAGGGCCGCUAGGCUGAUGUCGCGCCCCUUUCCCACC  
>P555  
GCGCCGGCACCCAGCUCCCGAUAAACGGCGCGCCGCGCGGA  
>P556  
GCCGGCAGCGGAAGCCUCC AUGCCCGCCACCGAGGAAGCC  
>P557  
CCGCACCAUGGUCCCUUCAAGGCUUGGUAUUUACAGUUCU  
>P558  
CCAGAGGCACCCAGUCCCACAAGGCGCCUACCUGCCCCGGAU  
>P559  
ACAUCUUACCUGGGGAUCUCAACCCGCGGCUCUGAUUCCGGC  
>P560  
UGCCAUCACUGCCACCCAGAAGACUGUGGAUGGCCCCUCCG  
>P561  
CGUCCUCAUGAAGCGGAACAUCUGAUCUCAGCUCCAGGG  
>P562  
AGGGACCCGGAUCGUCGGUAUACUGACAGCAGCGCCUCCU  
>P563  
UGGGGAAACUGGAAGAUGAACGGGCGGAAGCAGAGUCUGG  
>P564  
AAUCGCCUGCAUUGGGGAGAGCUAGAUGAAAGGGAAGCUG

>P565  
AAAGAGUGGAGGUGGGUGGUAGGGGCGGGCUGGGCCCUGGG  
>P566  
AGGGGAGGGGCGGCGGCCACAGGGGUUGGGCAUGGGGGAGG  
>P567  
UCCACCCCAGAGGAAGUGGAUCUGCUUCUCCAGUUUUUGA  
>P568  
CCAGUGCCGCGGCCUCAAGAUCAGACAUGGCCCAGAACUU  
>P569  
GGACCCGACAGGACGGCCUAGAGGAGGUGCUGCCGCCACA  
>P570  
CUCACAACAUUUGGCCUUCAUGCUCGUAAAAUCUCUUUUU  
>P571  
UGCCCCACCAUGUCAGACGCAGCCGUAGACACCAGCUCCGA  
>P572  
AGAGACAGGCCCGGAGGCUGAGCGGCCGGAGCAGCUGGAGU  
>P573  
CCGGCGAAGAAGGUGAGCGCAGUGCUGUGGCAGCAGAGG  
>P574  
GGAAGAUUCGAUGGACAUGGACAUGAGCCCCUGAGGCCCC  
>P575  
CAGCAGAUGGGAGCACCUGGACUUGGGGGUAGGGGAGGGU  
>P576  
GGGGCUGACGCGUCCAGCCCACGCAGGGGCCUGGGCGGCGG  
>P577  
GGUGCCCCGAUUGUGCGCGGACAUGGCGGGCAGCUCGGG  
>P578  
CAACUCUUAAGGAAAAACUCAUUGCACCAGUUGCGGAAGAA  
>P579  
AGCGCCAGACCCGAGCCUCACUCACUGCUCACUCCCGGGG  
>P580  
CAGUACUCCCGCCCCCGCCAUUUCGGACUGGGAGCGAGCG  
>P581  
UCUGAAGUUUCUCUCCAACACCUUUGCUCUCCUCCUCCU  
>P582  
GCCAUCUGCUCGUGGUUGUAGAAGGGGCAGGCUGCCUGCU  
>P583  
CGCCAGGCCAGUCCCCUCAAGCGCUCCUCCUCCUCAACU  
>P584  
CCGCUUCCGCCCGGCUUAUUAUCCUCCUUAUUGACAAACAG  
>P585  
CGUUCUCUCGGAAUUCUUUCAUAUUCAUAUCGUCCUCAGA  
>P586  
AGGAAUGGCCUGUCCGCGUUAACCAUCACAAGCCAUGGUU  
>P587  
AAAGGCGGAGCGUGCGGUAACGCGUGGUCGGGCUGCUGCU  
>P588  
GCGUGCCGCUCCGCCGACCGAAGAGGCUGGUAAGUCCUCA

>P589  
GACGGUUUGCUGGCUGAACGAGAGCAGGAAGAAGCCAUUGC  
>P590  
AUGGAACGGGAGACCAAUGGAAAUGAGGAUGAGGAAGGGCG  
>P591  
CUCUCCAUGCAAGUGUGGCCAGGGCCUGGGUAUCAUGUCC  
>P592  
GCCGCAGCGGCGCAGCUGAUAAGCAGGAACAGGUGAGAGGCU  
>P593  
UUGC UUUGAGCCAGCCAACCAAGAUUGGUGAAAUGUGACCCUC  
>P594  
CUGGUUUGCUGGCUCAAGCAAGCAUUGGUGAUCUCUGCUA  
>P595  
CUGGAUGCCGUGUCCAGGCAAGUAGAGCUCCAGCAGGCAU  
>P596  
AUCUGGCUAUAAGGCGGUUAAGGUUAGUGUAGGUUGGGCG  
>P597  
GUCCUCACGGGCCUCUGAAAACUCGCCUCCUCAUCCCU  
>P598  
UGGUCCACGGCGCACGAUGUAACAGUGGGGAAAGGCGUGCG  
>P599  
AGGUGAGUCGGUGCUUGCCAAGAGGCAGAGCGAAAACCUA  
>P600  
GGGGGAGGAGCGCGGCGGCGACGGCGGCGGUGGCUCUAGAA  
>P601  
AGGUCCAUCCCGGCCAGCCACCAUGUCCAUCACUUCAGC  
>P602  
CUGGCGCACCCGUGGAGGGAGGGGUCGGCGUCCAGCCGCA  
>P603  
CGCCUGCAGCGGGGCAAGCAGGAUAUGGCACGGCAGCUGC  
>P604  
GCUGCUGGAACCCGAGCCGAGCCGAGCCGAGCCACAGCGGGGAG  
>P605  
GAGUCCGUCCCGCCCCAAAACGAUCCCGCAGCAAACUCAU  
>P606  
ACAUCUUGCCGGUUCGCAGGACGUCUGCAGUCGGCAAACUC  
>P607  
ACGGCUUGGGCCGGUACGGGAUGGUCACGCCUUCGGGGGG  
>P608  
CCGCCUGGAGAAGGUGGCAGAUAGAGAAGUGGAAUGAGGAUG  
>P609  
GCCAGCGUGGAUGCAGGAGCAGCGAAGUCGUCAUGACAUGA  
>P610  
GAGUUCGGAGUUACA UUGCGAGGGCAUGUCAUUUUCAGAGA  
>P611  
UCACCCUGCCGUCAUGUCUAAGUCAGAGGUGAGUUAGGCGC  
>P612  
CACAACUGUGAAGUUAGAAAAGCCCUGUCAAGCAAGAGAU

>P613  
AAAACUUACCAUCAUUACCAAAUCCAUAUAGCCAUCCCCA  
>P614  
GUCCC GCCUCCUAAAAGAACACCAGGCCAAGCAGAAUGAAC  
>P615  
UCGGGUCAGCCCGGCCUUGGAGCGGGGGCCUGGGAACCCUG  
>P616  
AACCAAAAAACACUCACCCAAAAAAUGGCGCUAAGGCCGA  
>P617  
GAAGGAUGUCCCCGUGAAGAACACCAGCAGGGCCCUCCAUCU  
>P618  
GUGGCGUUCACCUCAGCUUGAUGCUGCAGCAGCAUCCGGAG  
>P619  
GGGAUGCAGGCGCGGGGGACUGGCAGCAAUCAUGCCCUG  
>P620  
CCGGGGCCUUGCGGAGACUCACCCCUUCAGCGUCGUGCCC  
>P621  
UUCUCAUCUUAGGGUCUGGAACAGAAUCUGACAGUGAUGAA  
>P622  
UGAAAGUGGCCACCAGCUUCAGGGGGUCCUCUGAUUAUG  
>P623  
AAGAGAAGUACAGCAUCGCAACUCGGAAGUCGCAGGAGGUC  
>P624  
ACGUCAAGCGGAUAUCAGCCACGUCCAUCUUCUUCGAGUCU  
>P625  
GGGCAGAGCAGAGGUGCUC AUCAGCACUGUAGGCCCGGAA  
>P626  
GAUCUUGCAGUAAUGGGUAUAGGGCUCCCCACAAAACAUG  
>P627  
GGAUGAGGAUGAAGAUGAGGAUGAACGGCAGUUACUGGGAG  
>P628  
CCCUUGAUCUGAGAAUGGCUACCUCUCGAUAUGAGCCAGUG  
>P629  
AAAAGAAAGAUGCGUGCUGAAAGAGAAAAAAGAAUGCCCC  
>P630  
GGACGACGACUACCUAAACGACGACGUGGAGGAGGAUGAAG  
>P631  
AGGGAGGGGGCAGCCCGUCGAGGCGCCUCCCUAGUCAGCGU  
>P632  
CGCGCUCCCCCGGGUCGCUACUCUAGGCGCCACGGCGGUC  
>P633  
CUAAAGCCUUUCCACACACAACCAAAGUUGGCUGCAGUUU  
>P634  
UCCGAGGAGUCCGCACACAAGUGAAUCCCUACAGCUCG  
>P635  
UCCGGCUCCAGGUGUGCCGAGCUGGCGCGCUCUUCG  
>P636  
UCUCACAUUCUUAUUCUGUACCCGACAGUGGAAACCCUU

>P637  
GUGCUUCCGGAGCGAGCAGGAGGACGAGGUAGGGCGCCCGG  
>P638  
UACCUGAAAAAACCCGUAGAUAGCCUCGGAGACCGCCGUG  
>P639  
GGAGAGGCCAACGAACAGGUUCCACUAUCUCGGGCAUGGC  
>P640  
UCGCGGGUCGCCGACUGCCCAGACUCCCCACCUCUGGUUCU  
>P641  
UUGCGAGGAAACCGCCUCGGAGCUGCAGCCGAAGGCCAAGG  
>P642  
ACUUGAGACUCACCGGCCGCACGCCAUGAGGGCCCUGUGGG  
>P643  
GGAUGGUACAGUAGAAGAGGAUCUGGGUAAAAGUAGAGAAG  
>P644  
AUCCUCGAGUUCGCGGUACAGUCUCUAGUAGAGCGCGUGU  
>P645  
CGGCUGUGGCCGUCGACAUACAAGACCAUGGGGCCAGC  
>P646  
UUGCUCUUGUGUUUCAGGGAUCCUCUUGUGCCCGUCGGU  
>P647  
GGUUACCUCAAAUUCUCCUCACGAAACCGUUUCCCCACCCC  
>P648  
CCGCCCCUCGCGCGGCCCCGAGCUCCGCAGGGCGGGUUGGG  
>P649  
UGUGCAGAUUCUCAAUACCACACCAACUUUAAAGUGUCA  
>P650  
CACCGGGCCAGUCCCGAACC AUGGCCGGGCCACCCCGCAAC  
>P651  
GUUGGAGGCAGGUGUCAUGGAGGGUGGAGUUGGCGCAAGCC  
>P652  
CCUCGGGCAGCCACCCUACACGGCCGCCUCCAGGCCCCC  
>P653  
UCUCCUUCUUUUUCUUUCAACCUACAAGGACACAAAUGCA  
>P654  
ACCGCUGCCGCUUCCGGCCCACGACCUCUGAGAAAUGUCC  
>P655  
UCGACCUCGCAGGGCCUCGCAGCCUCCAGGUCCUGGCCG  
>P656  
AGGAGGCGAGGGGCGGCCCGAGCGCGGGGCGGGAGCGAGGC  
>P657  
AUGGCGGGGAGACGAAGGUGACCAGAUCGCUGAGAUCGUC  
>P658  
CCAGCAGCCCCGCGGCACUCAUGUCGCCUCUGACCGCAGCU  
>P659  
AGUUCAAAUAUGGAGCGCGGAUCCUUUGGAUGCUGGUGCU  
>P660  
CCAUUUCUCCAUAUUAGCAUCCUCUGCAUCUCUAAAAAA

>P661  
GCUGCUGUUGUCCGAGGCAUAGGGGUUGGGUGUGCGGGGGC  
>P662  
UCUACUUCAAUCCCAUGAUGACCAAUGGGGUUGUGCACGCC  
>P663  
UUUGAGCAGGACGGGGAGGAAGCGGCUCUGGCCCCGGGGGC  
>P664  
CAGCCCACCGCCGGAGCCUGAGACCACAGAUGCCUCACACC  
>P665  
ACCACCUUCCAUCAGCCACAAGAAGUUUGCUGGAGUCAACA  
>P666  
AUCUGUCCUACGGCCGAGUGACCUAAACGUGUUGCGCGAG  
>P667  
GGACGCCGCCGGUCGCCGCCACCUGUCCACUGCAGCAGCA  
>P668  
AACUAAAGAGGAACACUCAGAUUUCUGGCCCCUCUCCUGA  
>P669  
GGAGGAGGUGGCGCGGGUGAAGGAGCAGCUGGCCUCCAGG  
>P670  
GGCAUCAUUCACGCUAGAGGACUGGUUCGGGAGUGCUUGGC  
>P671  
GCAGAACCUCAAAAACUCCACCUCUUCUUGUGAUUCCAC  
>P672  
UCUUAGGUAGCACCGUCGUGAGGCCCGAGGUGGGGUUGGGG  
>P673  
AGCUGGAGGCAGACCUGCAGACCAAGGAGCAGGAGAUGGGC  
>P674  
GCCCGGCCUCGACAGCGGCAAGUUUGGGAGUUGCACGAGU  
>P675  
GCUGGCCCCAGGGAAGGAGUAGAGGGGGCGGGCAGGGGUG  
>P676  
CGCAGCAGCCAGGAGGAGAAAGAUGAGAAGGAGAAGGAAAA  
>P677  
GAAUGUCAAGGCAAAGAUCCAAGACAAGGAAGGCAUCCUC  
>P678  
CUCCUCCUCAGCUGAGGGCCAGCGGCGACGCUUCCGGUGGG  
>P679  
UGCAAUGCAGGCCUUGGAGGACUGUGCGUCACCCGUCAACC  
>P680  
AUUUUUCAUUGUAGUGUAGGAGAAUGAUGAUGGAGACACA  
>P681  
CUUCUCAAAUUCACCAGUCAAUGACGUUUCACGAAGGUCG  
>P682  
CGCCGGGGACGCUGUCAUGUACGGCGCGAGCGGGGGCCGCG  
>P683  
UCUGAAGAGGAGGCGCGAAUAGAGGCCUUGUGUGAUGAAGA  
>P684  
CACUUACGGUAGCGACUAUUACGACCCGUCAGAGCCGACGG



>P685  
ACGUCCAGCCCGUGAUUGACAGCUGGCCGAGUAUGUCGCC  
>P686  
CUGGGAGCUGUGUUCAGCCCACCACAGGCCAGCCUCCCCA  
>P687  
UUCCUCCUGGGUAACGCGCGACUCCACCGCCAUCUCCUCC  
>P688  
CAAGGAGCGCGGAAUCGGGGAGCGUCCGGAGCUAGCUGGAU  
>P689  
CUCCCCUCCCCGGCCUCGCGAGCUCGGGCGACGCCGACUU  
>P690  
AGAGGAGGAAGAUGAGGAAGAUGAAGAGGAUGAGGAGGAGG  
>P691  
UCUGACACUCAGAAGGACACACAGACAGCCGCGGCCUGUCA  
>P692  
UGCCAUGAGCCUCUGGGUGGACAAGUAUCGGCCUGCUCCU  
>P693  
GGCUAGUUUGGAGGAUCUAGAGGACGAGGAGACUCACUCGG  
>P694  
CCUGCGGAAGGGAGGGGCGAAGGGCCGGCCGUUGCCGACG  
>P695  
GGUGAGUCAGCCACUGUCUAAACGAUAACGGGAGGCGGUUC  
>P696  
GCUGCCUGAGGCGGCGGGAGCGGGACGCUAGGGAAAAGC  
>P697  
CGCGGCCUGGGGCGCCUCGAGGGCGGCGGGCUCGGG  
>P698  
GGAGAGGUUCCUUGGCAGCAGAGGACGCUAGGUUUGGGAU  
>P699  
AGAGGGCACCUGCGCUCGGGAGGUUUGGGCGGCUUGGCGUC  
>P700  
ACACAAUUCGGGGGGCCCAAAGCUUGACAUUGUGGUUCCUC  
>P701  
GGAGGCGAGUAAGCCAAAGGACGUGGACCUGACACUACCUG  
>P702  
CAGCGGCAGGCAGUUUUCGAAGGCGCGCACGAAAAGCAAAA  
>P703  
UUCCUGAAGCUGUUGCUCUCCAUUUCUCUCUCUCAUAA  
>P704  
AGGGCUCGCGAGUGAAGAGGAGGAAAGGUGUGGGCCCACC  
>P705  
CGGGCUGAGCAGGUUUCUCCAGGAGCAGGUAGAACUGUUGC  
>P706  
GGUGCCGUCGGCGGAGAUGACAUGCCGGCCGAGUGGGGAG  
>P707  
GCUCAGGCGGCGCAGCGGCAGUGGCGGGGCGGCGGGGG  
>P708  
GCGGAAACUCUGGCGGCUCUCCAGGCACCCGCCCGGACCUGGC

>P709  
AAACUCAUCGAGGAAGAAACAGCACGAAGAGUAGAAGAAUU  
>P710  
CCCGCACCCGCCUCUGCCGC AUCCGCUGCACCACGGCCCCG  
>P711  
CAACAACAACAACAACAACAACAACACAGCGUGCGCAAGU  
>P712  
CUGCCAGUGCUACCCUGAGAAGGUGGACGUGUAAGUCACA  
>P713  
CCGCUCCUCCAGCUGCGCCCAGGGCGCACGAGCCGGCCAGC  
>P714  
GGGGGGCGCCGGGAGAGCGAGGGCUUUGCAUUUUGCAGUG  
>P715  
AGCCCCGCAGCCGCGCAGGAACUCGCGGAUGUUGCUCAGGC  
>P716  
CUCCCACCACGGCACCCCGCACACCACCAUCAACUGGGGAC  
>P717  
GCGGGGGCGCUGAACGGCGGAGCGGGAGCGGCCGGAGGAGC  
>P718  
GGUCAAGUGCAGAGGAGCAGAUUAACUCGUCCGACGCAGAG  
>P719  
CCUGGCCGCCGCGCCCGCCAAGCCGGGGGGCGGGGCGGCU  
>P720  
CUGGUCCC GCCUGGGAAGGGAUGCAAGGAAGCCUCCGGCG  
>P721  
ACUGUCCAAAGGUUUUUGGCAGAGCUGCUUCCCGAGCGGG  
>P722  
AGGGCCGCCAGGACGGGAUGACCGGAGCCUCCGCCCGCGG  
>P723  
GCCCCGCAACCGGAGGACGAGUUGGCGGCGUCUCAGCCU  
>P724  
UACUUUUUAGGAACUCGUGGAUCAGCUCUACUCAUUUCGAG  
>P725  
GUGCAGGGUCCGGGAUUUGGAGUGGAUGGGAUUUGAAAGG  
>P726  
AGUCGGCUUCUCUACGCAGAACCCGGGAGUAGGAGACUCAG  
>P727  
UAGAGCUCCACGUGUCCGACAUCCUAGUCUCCAGCCCUGA  
>P728  
GUCGGCAAAGUUUGGCCCGAAGAGGAAGUGGUCUCAACCC  
>P729  
CUUGCUCGCGUCGUGGCCGAGCUACUGGCGAAGCUAGAGC  
>P730  
GCGCGGUAGCGGGCUCGUGGAAAACCCCGGUCUGUUGUGCU  
>P731  
GGAGAUUUUCAGAAGUGUCACGGCACUUGGCAGGUCGGAC  
>P732  
GGGGCAGAGGAGCGGAGUUGAGGCAGAAGCCAGGUGAGGCU

>P733  
AAAGCCGGGCACCAGACGGGAGGGGCGGCGCUCGGGCCGCG  
>P734  
CUGCUUCUCAGGAUCUCCACAGGAACUGGGCAGGGGGGCAC  
>P735  
GUUGCGCCUUCUCCAUCUGGAGGCCCGGCCAGCUCCGGGG  
>P736  
UCCCCUCCUCUUUCCCGCAUAAGCUUGCUCCCAACCUU  
>P737  
CGGCGGCGGGAGCGGUCCCCAGGAAUGUCGUGCCGCCGCC  
>P738  
AGGAGAAGGAGGGGCGGGCGAGCGGGUGGGCAGCGGAGAGU  
>P739  
CCUUCUCCACUACAAAGGCAACGAGGGGAGACCCCGUCCUC  
>P740  
CCCUGAUUGCGGUGCCACGGACUGCUCCUGCUGGGCGGAGA  
>P741  
GUUCAUAGUGAUGCAGAGAAAGAACAGGAGGAGGAAGAACA  
>P742  
CAUCCCGACCCUCUUGUUUAACUUUACAUCCCGAGGCAGCG  
>P743  
UGGGCAGCUGCUCACUGCGCAGCUGCUCCACGGUCCACGCC  
>P744  
AAAAGCUCAGCCGCGGUCCCACCCGACCCUAGCUUCGUUA  
>P745  
CGGGGUCACCACCCUGGGCGACCCGGAGGUGGGCGCCUCCGC  
>P746  
CACGAACGGCGCCGCUUCCCACAUGGAGCCUCCGCCCGCA  
>P747  
CCAGGGAGCACCCCAAAGCAACAGCACCCAGGACUGCCAGGG  
>P748  
GAAGAGUCAGAGGGGUGACCAGAGAGCCCAACGCCUGGUGC  
>P749  
GGAUUACAACUAACACACGCAGACUACAGGGUCCAGUGAC  
>P750  
CCCCACCAGUGUGCACAGCACCGGAUCCGGAUCCGGCUUC  
>P751  
CUGCCACACGGAAGCCAAUGAGAU AUGGGCAUACAGAGGGA  
>P752  
CAGGCUGCGCCCGCGUCUUCAGGGCCAGUCCUCGGACCC  
>P753  
GACGCGGCGGCGCCGGCACUACAGCCCGGGCCGCCCGCUCC  
>P754  
CGCGUCCCUUUGGGUUUAGCACGAUGAGCUCAAUCGGCACU  
>P755  
GGGUUGUUGGGGACGGUUGAGCCUUGGGAGGGAGGGUCAG  
>P756  
CGGGCCAGCUCUCGGUUUCC AUGGCUAACGUCUACUCCGGC



>P781  
UGUGGCUACGGCUGCUCGGAAGCUGGUGGCGCCGCGAUAGG  
>P782  
UGUCGCGUCCGCUCUCCUCAGGAGCAGGGAUGCCUCGACC  
>P783  
CGCCCGCACCGUGCGGGCGGCAGCAGCAGCCUCCGGGCUCCG  
>P784  
UGGGGAGGCACGUGAGAGGG AUGAAAUCGGCAUGACAGGC  
>P785  
CUUGAGGCUGAAGAAAAGGCAGAUCCAGAGAUACGGCA  
>P786  
GAGCUGCAGCCGGUGGCGGCAGCGGCGGCAGGGAGCGGU  
>P787  
GCGGCGUGCGGGAACUCAGCACUGCGCGGCGCUUGGCUUAC  
>P788  
CCUGGCUCUGGCCUCGGAGAAGAACAUCGCGACUACAACAA  
>P789  
UCUAACAACUCAAGGACAAGAAAAGAAUAUGAACCUCU  
>P790  
CUGGGAAAGGCAGGACCUCGAGGCGCGGCCGCGAGGUGA  
>P791  
AGGUGCCUGGCCGGGCCCGACGAGGCGGGAGGGCAGGC  
>P792  
UCAAAGCUCCGAACCAUCCCAGCCCCAGCAGAAGGACCCCC  
>P793  
AAUUUCUGCCUGAAAGGCGAACGUCUCAACCUCUCCUCCU  
>P794  
CGCGGGUUGUGGGCAUGAGCACGCCUGGAGAGGCCAUGGGG  
>P795  
GGGCAAAGGUCCCACGACGGACGCACGGGAGGGAGCCACCG  
>P796  
ACGCGGACGGGGCGGCGAGGAGGCGCCGUCUGCCGGGGC  
>P797  
UGACCGCCUGGGCUUCUCAGAGGUGGAGCUGGUGCAGAUGG  
>P798  
ACAAGCCCAGCGAUGAGCACAGACCGACCUCAACCCCGAC  
>P799  
AGCAGGACGGCGGGAAGAGGAGUGCGGAACCCGCGGGAGGU  
>P800  
GCAGGAGAACAAGGACCGGAAGGAGCAGGCGGCGAAGGCAG  
>P801  
ACAGCGUCCUCCAGCCCCUCACUUGUGCUGUCGGCCUCGGC  
>P802  
CAGGGAGGGCCUGGGGCGACAGCGGAAAGGUUAAGCGUCGA  
>P803  
GACACAGAAGGACAGAUAGAUGCCCAAGUUCAAGAUACC  
>P804  
CCACCGUAGGUCCCACCGACAGCCACAGGUCCCAUUGACAG

>P805  
GCCCCAGGCGGUGCUGGUGGAGAGCGGGCCCGUGUCAUACC  
>P806  
CGGCGCGGGCGGCCGGGAAAUGGAGGCGC GAUGGCGGGGG  
>P807  
AGGGGCCGUGUGGGCGGGCGAGGGGGCGGGGGCGGCCGCAG  
>P808  
CCCCUCCCGCUCAGCCGAGAAGGUGAGCUCCUGGGGAAGG  
>P809  
GAGGCGGCGGCAGCGGGUGGACCCCGCGGCUGGGGCCCGGG  
>P810  
CUCACCAGCCGGUGUGGCCCAUGGGGCUGGGCCGGGCCACC  
>P811  
UUAUCCACCCGUCCUCUCCAGCUCACCAAUCACUCGGCCU  
>P812  
AUGCUCGCAUCUCCACUGGACGGCGACGAAGGCGGUGGCC  
>P813  
AGCUGGGAGAGGACGGGUGGUAAGAGUCCAGUGGGACACA  
>P814  
ACCUGGGAGGAAGCUGGAGAAAGAUGCCUCUGAAUCUUU  
>P815  
GCACCAUUUCGGGGUGCCAAAGCAGCCAUGGAAGAGCCUGC  
>P816  
UUCCCGGAGGCGGCAUGCCUAUUGGCGUCCUCGAGCAGGG  
>P817  
CAAUGUGCUGAUCCUGUACUACGCCUUCUCAUGGAGUACA  
>P818  
CCCGGUUCCUCGGUUUUUGCAACAUGUCUCCGGCGGCAGGU  
>P819  
UCCAAACGCUCUCAAAUUGAACUCCGCUCGGCUGCUUUC  
>P820  
AGGACGCAGCUGUUGCCAUGACGGCCCAGGGGGGCCUGGUG  
>P821  
GGACCGCUGGCUUAUAAGCGAUCAUGUUUCUCCAGUAUAC  
>P822  
CUCCCGCCAUGAGCCAGGGAAGUCCGGGGGACUGGGCCCCC  
>P823  
UGAUGCACUGAUUGUUUUCACCUGAGCCUGGAGCUCUCCU  
>P824  
UUGCACAUUGAAGGAGGAGAAGAAGCAUGAUACGCAUCGGG  
>P825  
AAGGGUCCAAGAUAGGCAGAAAGAAAUGUUGCCAGUUGA  
>P826  
UUCUCCUUUCUAGGUUAAAAGGACCAUUGUUAGAAGAGCA  
>P827  
AGGCCGGCCGAAUGAAAUUGACCACCACCUCAGAAAUGC  
>P828  
GCAGGGGAGAUUAUGGUGGAAGAGGGGGUUUAUGGUGGAAGA



>P853  
CAGUGGCGGGACGGCGAGGAGGUGUUCGGUUUGCGCAGCG  
>P854  
CGGCCAGGGAGGGACGCGGACUGAAAAGGGAGGACACUAG  
>P855  
UCGCCGGUCGCCGCCGGCCCAGGUGAGUCCGAUGCGCUCGG  
>P856  
CAAAAUGUCUACUGUUCACGAAAUCCUGUGCAAGCUCAGCU  
>P857  
GCUUCUGCAAAGCUGUUGCCAGACGCUCCUGGGCACGAUCC  
>P858  
AGGGAUGGCUGAGCGUGAAGAUGCAGCGGGUGUCCGGGCUG  
>P859  
CGCACCAUGUCAAACAAGAAGAGAGGAGAGGAGAGAACGA  
>P860  
UCCACUCCGGUCCUGGUUGCAGUGGCUUCCUCGGCGGGCGGC  
>P861  
CCCCCCCUCUUCCACAAGUGCCUCCGGUGGGCCCC  
>P862  
UGCUCAGGUAGUGGAAGACGAGGAGGACGAGGAUGAGGAGG  
>P863  
CCAGACAGCUCGUCAGGCCACCUGUACCGUGGCAUCUUC  
>P864  
CAUGUCGAAGCCCCAUAGUGAAGCCGGGACUGCCUUCUUC  
>P865  
CGAGUUCGACGAGGACGAGGAGUGCAGUGAGGAGGACAGCG  
>P866  
GCCGCGGGAGCCGAGCUUGCAGCGAGGGACCGGCUGAGGCG  
>P867  
CACCGCAGGUCCUAGGUCCCAGUCACUCUGCCGCCAAGUUC  
>P868  
CCGUCCAGUGGGACCAGCUACUUGGCUGACACACAUCGAG  
>P869  
AUGGAAGAGGAGGAGGUCCACAGUCGGGAACAUGAAGGGA  
>P870  
GCAGCCAGCGCGACGUUCCAAGUCCGACUCCAGUGGGCGGC  
>P871  
GGAGGGGCGCAGGGGUCCCCAGGGGGUGCGGUACAAAGAGG  
>P872  
GCUGAGGCCGCCCAUGGCAAGCCGGCGGUCCCGGCGACG  
>P873  
UUUUCUUUCUAGCCCUCCAACUGCAAGCACAUCUCCGGC  
>P874  
AUUGUAAAUGAAGAGGAAAGACAAGAAGCCCGAAUUGAAC  
>P875  
GCCUGUCCGGGUGACACAGCAGGGACCCCGGAGGCUCCUAC  
>P876  
CAGCCGGGCGGGCGGGCCAGGCGUCCCGAUGCCCG



>P877  
AAAUAAAACAAAGCAAGACAAGGGCAAAAAAAGAAGGAAG  
>P878  
CUCGUCGGGCGUCCCGGGCGAGCCUUCGGCCGCGCAGGACC  
>P879  
GUUCGCUGUGACUUGUCACGACCGUACCGCGCAGCAGCGGC  
>P880  
UGCUGAGGGUGCGGCUGCAAGAGCCAGGCUGCGAGAGCUU  
>P881  
UCACCGCUGAGAGCAGCUGCAGUAGCUGAGCAGUGGCAGCA  
>P882  
GGUUGAGCGGGCUUUUUGGAAGUUUGUGGCGGAGGUGAGGC  
>P883  
GAUGGAGAAGGUGCUACAGCAGCGGCGGGCGCUGGAGGAGC  
>P884  
CGCGCACCUGGUACUCGGCCAGCAGCUCCUUGGACAGGCGA  
>P885  
UCACUCGCUGUGGGUUCGCGACCCGGGGGUGGCGGGCCCA  
>P886  
CCGAGCCCGGCGAGGCGGCCAUGGCGCGGACUCUGCGCGGG  
>P887  
GCUCGGAAGGAGGGCAAUGAGCUGUCAAUGUGGAGACU  
>P888  
AGCCGCAGAAACCGAAGCCGACCAGGCCCCCGGCCGCUCC  
>P889  
GGUCGAGACACGGUGGCUGCAGGUCUGAGACAAGGCUGCUC  
>P890  
CGGCCGACUGCUGCUCGCCGAUCCGUGGGGCCCCUGUGCC  
>P891  
CUCCUUUCUCCGGGUGCCGUACUGCCUUUUUCCCCUCUUU  
>P892  
GCUCGAUCAGCUCGCCGUCAGCUUGACCAUCCUGCAGCCU  
>P893  
UUGAGGAGAAGAUCAUCGGCAAAGUGGAGAAGGUGGACUGA  
>P894  
CAAUGGCCUCCUCCAGCGUGAGGCCACCCACUCUGCCUCC  
>P895  
UCCGCGCUCGGCCCGGCGCUACCCGGCCCGGUCGCCGCGCC  
>P896  
GCGGCCUAGGGAGGGCGGCGAGGAUCCGGGCGGCGGAUGGC  
>P897  
AGGCCAACCCCCAGCCACCAGCCAGGGCCAGCUGCCGAA  
>P898  
ACACCAUCACCAAGGGGCCAGCAAGCUGGUCGCGCAGCGC  
>P899  
CGGGGAACUCCUCGCCACCAGGGACAGGAUCAGCGACGUC  
>P900  
CACUCUCUGCACAAACUGGUAGCCAAGGUGGUUGAGCUCCG

>P901  
CUGUGCGGACUGUGCGUGGGAGCUCGGGGCCCCAGGGCGCU  
>P902  
GAGCCAGUGAGGCCCCUGGUACCCAAGCCCCUCCCCUGAC  
>P903  
GGGAAACAGGCCACCGCCAAAGCCAUGGCCCGCCGCGAGA  
>P904  
GCCCAGGCACCUUCCUCUUC AUGGGCUGGAGCCGCUUUGGG  
>P905  
AACCUGGAGUUUGCCCAGAAAGUGGAGCCUGCAACGACCA  
>P906  
AGGGUCGGGGUGGCCCGUAAGGCCUGCACGAGCUGGUCCA  
>P907  
GGGUCCGAGCUCGGCGUGUCACCCUCCGAGAGCCCGGCGGC  
>P908  
GGCUCCUCGCAUCUUCCCAACGGUGUCUGUCCAGCCUG  
>P909  
CCCGGGCCGCCUCGCCGUCAGCCGCCUCCAGGCUCCACGGA  
>P910  
GCUGCCGGUCGCUAUCGGCCACACGGGCACGCUCCUUGGCC  
>P911  
CGGGCCGCGCCGUCCUCCGCAGCAGCGGCGCCGCCUCCUCG  
>P912  
CCGCGUGCGCGCCUUGCGGGAGCAACUGAACAGGCCGCGCG  
>P913  
CGCUUCCUCUGGCAGGGCCAGGCUCGCGACUGCUGGGGUG  
>P914  
CGUCUGCGUGGGGAGGAACUACGCGGACCACGUCAGGGAGA  
>P915  
GUGGUCAGUGAACUCCUGAUAGGGAGACUUGGUGAAUACAG  
>P916  
CCUCGGCCCCGGCCCCGUCCACGGCCGCGACCCCGGCCCCG  
>P917  
GUUGCCGCCGCCGCCGCUCCAGCUGAAACCUGCUAGGGUCC  
>P918  
UCGGACUCCAUCCUCACCCC AUGAGUUCUCUGGCUCUCCCU  
>P919  
CCUGCCCCACGGGCGUACCUAGUCCCCGAGAACUCCGGGA  
>P920  
AGGGGCCGCCGAGCGCUGGGAGUCCUCCUGUGGCGUGGGG  
>P921  
GUACCUGUCCACCUCUCGUAGUCUUCGCCACCAACGACCC  
>P922  
CCAAGGAGAAGGCUCGAGCC AUGCGAGUCAACAAGCGCGCG  
>P923  
GGGUCGCCGGGGCCACCGCAGCUCCGCCAACUCCGCCAAC  
>P924  
UGCCUACUCCCCGCGGGACGAGGAGGACAGCAUGGUAGGUC

>P925  
GCUCCAUCCCCGCCCCACGCACACGGCGGGGGCGCCGUCCC  
>P926  
AAGUCCAAGGAUCGCUCAAAAAGAUAAAGGGGCCACCAAGGA  
>P927  
CCGCCACCGCCUCGGCCCCGAGAGCUUGCCCCUCCCCACC  
>P928  
UCCAGAACGAACAGCCUGACACAUACGCACGGGGCCGCCGC  
>P929  
UGAGGAGCGGCGGUGGCCGACGAGCGGCGGGACUGCGGGG  
>P930  
GGAGGCAUGGCCCCACUUGUAUCCAGAAGUUCCAGGGGUG  
>P931  
CCUGGGCGCCCUACCUGAUAACGGCGCCGCCUCCUGCGACU  
>P932  
UCCUCAGCCUGUUUGAGGACACCCUAGACCCAACCUGAGCC  
>P933  
CCGCGAAGACCCCCGACAUAAGAAGUGGUGUCCACCGCAG  
>P934  
GGGGGCUCGGGCGCGGACUAAGCAGGGGGGAUCUCCCGCGC  
>P935  
CGCCCCAGUCCAGCCUCCACAUUCCAGCCCGUCACCACG  
>P936  
GAUCAUUGUGAUGGGCGUGCAGGUGGUGGGCAGGGCCUUUG  
>P937  
UCCCCGGCCGCGGGGCCAGGAGUCGGAGUUUGAGCCCCGG  
>P938  
GAACCGCUUCAGGGUGUCCAAGUUCGGCACACCGAGGCUC  
>P939  
GCGAGAGCAGCAAGAACCACACCCAGCAGCAAUGUCAGCGG  
>P940  
GCCAGAGCAGUUAGCCAGUUAGUCCCCAGGCCUGUGGCCAC  
>P941  
UGAUGUAGACGUUGACCAGCAGGUCGGACGGCAGGGCAGGG  
>P942  
UGUCAUUCUGCCGAGCUCCACAUUGAUGCUCUCGGCAAAG  
>P943  
GCCUGACAGGGCCCAGGCGGAUGAGGUCUUGCAGCUGCGGG  
>P944  
GCCAGGAAGCGGCGCUCGAAACUCUGCAGCAAGAGUUCGGU  
>P945  
CUUUGCAGGGAGGAGGCAGCAGACACUGGAGAUGACAUCU  
>P946  
CGGCUCUGCGAGGCCUUGCGAGCGCCAGGGAGGCGCCACGA  
>P947  
CGCUCUGCUGGUCCGGCAUGAGACCGUGAGACGAGAGACGG  
>P948  
ACUGUCUCUUCAUAGGAUGGAGGUGCGGAUGGUGCUGAGGA

>P949  
CGCCGGCUCACCUC CGCUCACA UUCGGCCCCGCGCCUU  
>P950  
GCUCUGAGGCCAGCCGCUCGAUGGGGAUCUGGGCGCCGGCC  
>P951  
GUCGGCGCGCUCGGCCAGGCAGCCUCUGACAAUAGCGGCC  
>P952  
AGCAGGUUGGUGCUGCGAUUAUCUCCUCGCAUCGUCUC  
>P953  
CGGGGAAGGUAAUGAGCCGCAGAGCCCCGGGGUCUCGGCUG  
>P954  
AGCGCAGGAGGACAUAGCUGAGGAGGAGCAGGACGGCCACC  
>P955  
AGGAGCCCCGGCGGGUCCGGGACUCCCGUCCGUGCCGGUGCG  
>P956  
GUUCUGCGCGUGGGACGCCCAGCCCGCUUCAUCUGCGCCCCG  
>P957  
CGGCAGUGACCGUGUGUCAGACAAUCUUGAAUCAUGAAGC  
>P958  
GGAGGAAGCCGAGAAGGAGGAGAAGGAGGAGGCGGCGGCGG  
>P959  
ACUCCGGCGCCGCACGAGGCAGCCUGCAGCCGGCCCCGGCC  
>P960  
CAACCAUUAACGAGCUGCUUAAUGACGAGUUCUUACUUCU  
>P961  
CAGGUGGUGGUCCAGGAGCCAGGCCAGGUGUUCAAGCCUU  
>P962  
CCGCGCGGUCGAGGCCUGUCAGCCUCCGCCCGUUCAGCCUC  
>P963  
GUUAGGAGAAGAAGAGAGGCAGGGAAGACAAGCCAGGCACG  
>P964  
GCGACCUCCAGAAUUUCCUCAUCGCUGUCGGUGACCAAGUC  
>P965  
CCGCUCCUGUCCCCGACAUCACGUGUAUUCGCACGUCCCC  
>P966  
CAGCCACAGCCCACCUUGCUGAGGGGACCCCCGCACCCACC  
>P967  
UCGGCAGGCUCUUCUCCCCAGCGCUGGGGACUUCUCCUG  
>P968  
CCCUCCUUAUGCACCUCCAACCCUCCUCUCUCCUUUCUCU  
>P969  
GGUCCUGGGGAUCCCGGGGAGGACCUAGGACGGAAGGCCU  
>P970  
CCGCCGACAUGCCGGGUAGCAGCGGCGGACGGCGAUCCAG  
>P971  
GGAUCAAGUGGCACAGACCAGAGGUGGGUGGGCCAGA  
>P972  
UUAGCUACAAUCGUUCAGCUAUUCUCGGAAGAGAGAAGGGA

>P973  
GGAAACCCAGAACCAGGAGCAUGGCCGGAGAAAGUCAGCU  
>P974  
CGCCGUCCGCCGGCCCGUUC AUGACCGGCCGGGAGUGGCG  
>P975  
GCCUCUCCUGCCUCCUUCAACAGGGUUUCCCUUCAGGCC  
>P976  
ACCCUUCUGGCCUCGCACCACUGUGACUCUGCCAUCUUC  
>P977  
GGGUCCUGGGAGCCGCUUUAAGGCAAACACUCUUUGGAU  
>P978  
CUCAGAUUAUAUGAAGCAAAGUCAAAUAUUACCUGCAGG  
>P979  
CCAGGGAUCCACUGUCAAGCAGAUACCCUCUUCACUCCAAU  
>P980  
GCCAUUUCACCACCCACAGUGUGCCGCCGGCCGUGG  
>P981  
GGAGCCGGCCAAGGAUGACAUCAAGAAGGUGAUGGCGACC  
>P982  
UCACGGCAGUGCACUGCCGAGCAGGCACGACUGCUUCAUG  
>P983  
CCAGCUUGGGGAGCGGAUGGAGCUGACAGAGGAGCCACCG  
>P984  
UGUCAGAGUGAGCGGGUACGGGAAUCCAAAUUGAGG  
>P985  
UCUCAUUCUUGUGUUGACGGAGUUAUAGUUCUCAUCAGCUU  
>P986  
GUGCAAUUCAAUGCAGUCCGAUACCGGGAGAAGACGUGG  
>P987  
GCGCGCCGGGUCGGCGGAGAGACGCGGCCCGGGGAUGGGG  
>P988  
UUAGCACCUGUGAGAAUAUGACUUCUCUUGGAGGAAUGAA  
>P989  
AGGGCUCCGGUGAGAGCUGAAGCAGUAAGGAGGAUGCCCC  
>P990  
UCGCCACCUUCUCCCCGAGCACUGCCCCGGCCGCGCCAUG  
>P991  
UCUUCGCUCCAAGACCUUCCAGCUCACUUCUGCCGUGAGUC  
>P992  
AUCAUGACAAACACAAGGACAGAAAGCGGAAAAAGAGAAAG  
>P993  
GCGGCGCAGGAGCAGUUGGUAUCAUGGCGAGCUGAAGAGG  
>P994  
GGGUCCAUUUCGAGGCAAGGAGAAGCAGGAGUCCCCGAUCA  
>P995  
UCUCGGACCUGUCACAAAGGAGUCGCGCCGCGCCGCGCC  
>P996  
CGCUUGGCCGGCGGGCUGGAGGCUCCUGCAGCUGCGAUGC

>P997  
GCAAGGUGCGCGCUGAGCGCAACCGCGCGCGAGGAGGUG  
>P998  
UGAUGCUGUUCUUGGGCUGGAAGAUCUCGUUGUAGUCCUCG  
>P999  
CGUUCGCGGUGGCAGGGAUGAUGGCAGGCUCAGCCUUGGGU  
>P1000  
AUGGCCAGGCCUGCCAGGAAGAGCAGCCACCCCGCCUUU  
>P1001  
CGGGCGGGCGGCGAGCAGAAUCCCGUGCAGGAGGCGCGC  
>P1002  
UCCUUGUUGACCCCGGCCCAAGUCCCAUCCCAUCCCAUCCCA  
>P1003  
AGCUCGCAGCUUAGGAGCUGAGAUCGCGGACUAGCGUUG  
>P1004  
UCUGCAGACCCAGCAGCAGCACUUUCCCUCAACUCUUCUCA  
>P1005  
UGAGACCUGUCUCUAUCUUCAAAUUCGCGUGCCUUCUCCG  
>P1006  
AGGAGGAGCCUGAGGAGGAGACAGGACAGAGCGUCUGGAGA  
>P1007  
GCCAGGGGGCCGGGAGCUGACAUGGCUGAAGCAAGAGGUC  
>P1008  
AAGAAGAAGGUGUGAGUGUGAGUGAAAUGGAGGCAACAGGA  
>P1009  
GGACGGCCGAGGCGCGGCGACUAUGACAACCUCGAGGGGC  
>P1010  
CAUUUCCUUCUCAGUACUGGACCCAUUUAUGAGGAGGUGGC  
>P1011  
GCGCCUACCCGCGCGGGAAACCCUCCGCUCGCCUCCGCU  
>P1012  
GAGAGCGGCAACUCCUUGGACUCGUGCUCCGCUGCCACCU  
>P1013  
GAGCGCGGCGCCGCGCGGCCAACGGGCGACAACCGAACCU  
>P1014  
GGCCCGCCGCUACUGCGGGACGCCCGCCUGCCAGCUGCCC  
>P1015  
AAUAGAAGAACAGAAGAGGAAAUGGAAAGAAGCUCAUUAU  
>P1016  
UCUUGCUGACAGCUGAAAUCACAGGGCAAGGGAGCUGGUGG  
>P1017  
GCCACGAGUCGGUGGCCAUAGUCCCGACAAGGGAGACCC  
>P1018  
UCCUCCAGGUCUGGCCAGCUACUAAGACGAUCCUCCGCCCG  
>P1019  
GCGGCAGCCUGGCGCCGAC AUGUGAAGGGGAACCUGCCAG  
>P1020  
GACGCGGGGCCUGAGCCUGGAGCACCAGAAGAGCAGCCGGG

>P1021  
GAAAUUGUUUGAAUAGGAGAAGUAGGUUUGGUUCUCGAGAA  
>P1022  
AAGGAGCAUGGCGUGGAGACACCUGAAAGUGAGUCCCGCGA  
>P1023  
GGGAGGGGGGCGUGUCGUUUGAGUGAGCGGCAGACUGCGAGG  
>P1024  
UGCAGAGAAGAAAGAAGGGCAGGAGAAAGAAGAGAGCAAAA  
>P1025  
AUCUCUGUCUCCUGCAGCUUAAAUACUUUUUGGUGGCAGCG  
>P1026  
CCGCGGCGGCCGGGGCGGGGAGAUGGCGGCGCGAUGGAGCA  
>P1027  
CAUCGGAAUGGGCAAGCGGCAGCUGCUGCAGGAGGAGGUGG  
>P1028  
ACUCCCAGCAAGGCUCAGCAAGGCCUCUACCAAGUCCCGGG  
>P1029  
GGCCCCGGGGCGGGCGGCAAGAUGUCCGUGCCUGUGAGUA  
>P1030  
GAAGUAAUGGUAUCCGGCCA AUUGAGAUUCGGAGUAAAAC  
>P1031  
GGGAACUGCGUGUCCUCCAAGUCCUCCGCGCCCCGGGGG  
>P1032  
GGCCAGGUGCCUCCACAGUCAGCCAUGGCAGCGCUGCGCUA  
>P1033  
CGGUGAGUCUCGGGAGUCCAGGCCGUUCCGAACGCGUUC  
>P1034  
GGAACAGCUCUUGAGGAGUGAGACUGCAGGAGAUGUGGGCC  
>P1035  
UUUCCCAAGAGACCAUGCAGAGAGGCGGGCAUGCAUGGGGC  
>P1036  
UGGCGGCCGAGCGAAAGACAAGGUUGUCCAAGAAUCUACUG  
>P1037  
CGGUCUGAGACAUCACCGCCAGCUGGGCAUCGGGGAGAUG  
>P1038  
GGUCCUCUCCCCGGGGAGCAGGCAGAUGACUUUGGCAAGG  
>P1039  
CAGCCUGCUGAUCCAGCGCACCAAUGAGGAGGAGAAGUGG  
>P1040  
AGUCCCAAGCGCAAGUGGCAGGGAUCGAGGCCGUUUUUG  
>P1041  
GCCUCCAAGUGGGACUACGAAAGAACGAGUGGAAGAAGUG  
>P1042  
GCGCCUGCAUGCUGCUUCCGAGACGGCUCGCCGGCGCCUC  
>P1043  
UGCGGACGAUGUGUGUGUGAAGGGCGCGUCAGCCAUAAGA  
>P1044  
GGGAAGGUGAACACGGACGGACCGGAGAACGGGUGCUGGAA

>P1045  
CGAGUGGACGCACGGAUUCAAGGGGCGCUACGGGGUGCGGG  
>P1046  
UCCUCAAGCAAGAGAGACGGACAUCUGGUCCUGAGUCCCA  
>P1047  
GCCUCCCCGGGACCCACGAAGAAGAGCCUGUGGACAGACA  
>P1048  
GGUGCCGAGCUCCGCGUAGCAGAGCGCGCCACGAUGGAGA  
>P1049  
ACGAAGGGGAGGAAGACCGGACAAGCGACCUUAGGGAUGAG  
>P1050  
CAAGGAGCGGCAGCGGAGGAAGGAGGAGUGGGAGCGUGAGC  
>P1051  
CCCGCAGGACAGACAGACACAGACAGCGCUAGUGACCAGCA  
>P1052  
GAUCGGAGGCACCAUCAAGCAGCCGCCAGCAACCCCCCGC  
>P1053  
AGGGGGCAAGCGCGAUGAAGAGCUGGUUCUGCCAUCAACU  
>P1054  
GAGACUGCGGCUGUCGGUGGACGAGGUGAGGGGCGUGGGGA  
>P1055  
CCACCCAGGCGUGGUUUCAGGUGCACGCACAGGCCGCC  
>P1056  
GGCAGGAUCUGCCUCGCCACAACUCUCCUCGUCCUCCGCC  
>P1057  
CCUGGGCCCCACAGCGGCCGAGGACCCGGGCCUGGACCCCG  
>P1058  
GAAACAGGACUUGGGCGAGGAGGAGACCGAAGAGACCCAGC  
>P1059  
CCCCGACCCCAACCCCGGAAGCCGACGGCUGCGGCCUCG  
>P1060  
GCCGCGCCGUCGCCCCGUCCACCCUCGGCCACCGCUAAGG  
>P1061  
CGCCUGGAGCGAGCAUGGAGAGGCCAUCCGCAGAGGAGCGC  
>P1062  
GCGUCAUCGUCAUCACGGAGAUCGAAAUGCAAGGCGCCGGG  
>P1063  
CACGGGCGAGGGCAUGGACGAGAUGGAGUUCACCGAGGCCG  
>P1064  
GGCCCGUUUCCGGCAGGCCACCUC AACCCCUUCAACAAGC  
>P1065  
GGUCCAGGCUUGGGACCUUGACGCGAGGCGCUGGGUCCGGG  
>P1066  
CCCUCUUUGACUUUAAUGGGAUGAUGAGGAAGAUCUCCC  
>P1067  
GCAGAGCACGACGAAGACGCACAGGCAGCCGGGCCGGGCCG  
>P1068  
GUGCCCAGGGCCCCGCGUAGAUGGUACACAAGCUCCGCGGC



>P1069  
AGUUGGCCGACCAUGGCUCCACCGCCAAGACUUCCCCGCGG  
>P1070  
CCACAUCGCACUGAUUUCGAGGGUAGGGAGGGGAAGCAGG  
>P1071  
ACGCGUAUGGGAUUACAAGAACAAGCGAUGCAUGAAGACCC  
>P1072  
GCCCCCAGCAUGGGCAGGAAGAAGAGGAACAGGACAAAGG  
>P1073  
CGGUCGGCAGGCCGGGCGCCACUCUGCGUCGCUUCUCCAGG  
>P1074  
CGGGCCGAGCUCACUGCCGAGAGACCCCCGGUCCCGCCAG  
>P1075  
ACCCCGCUGCCUCGGCGCCCAGGCUGCUCUCUCCGCGCAUG  
>P1076  
CCCGAUCCGGGCGCCGCGGGACCCAGCCGCGCUGCAUGAGC  
>P1077  
GUGAACGCCUCCGGCCCCAAGCCGGUGCUGGCCCGGCUC  
>P1078  
UUUCCGCGUUUUAUCCCCGUACCAGAAAAGGAUACAUUUAG  
>P1079  
GGCUGACACUUGGGGGCCAGAAUGUUCGGUGAUCCGGGAC  
>P1080  
CACCACAAGGUCAGCAAUGAUGUGUCCUCAGUCUCCCCAG  
>P1081  
CGCUGGCAGGGCUCACCACCACAGGCCCCUGCUGGGCUGCC  
>P1082  
GCCGCUCGGCGGCUCUGCUGAAUUCGCUUCUGUUCAUAGUA  
>P1083  
CCCCAACACGGAGUCCAGAUUGGGCCUGAGGAAGCCAUG  
>P1084  
GGCGACGAAGGCAACGACGAAGAAGCUGGUUUCUCAGCUUC  
>P1085  
AGGCGCGGCUGACCGGUGGUAUCUGCAGGUACUCCAGCCGC  
>P1086  
UAGGCGAAAUGGUCUUGCCAUUGUGCUGUCCACGGCCCG  
>P1087  
GCCUUUGGGUGGGCGGUGGAGCCCGGAGCGCGGGCGA  
>P1088  
AGCACCCCAAAGCCAGCCCCAGCUCCUGGCCCAACUUUCG  
>P1089  
UCAACCGGGCUGAGGCGGACACUUCUGUGGAGCGAAGCAGU  
>P1090  
CCAACAUCGGCUCUGGUGACAGCUGCUCUCCCCUCCACCUGA  
>P1091  
AGCCACCCUGGCGAGGGUAAGCCAGCGGAACGGGGAGC  
>P1092  
CUCUCACCUCGCGGAACGCACUGACUCGACCCCGUCCGCU

>P1093  
UUCACCUAGCUCCCUUGGCCAGGAGCGAGCGAAGCUGUGGC  
>P1094  
CCAGGGCGCUGCACCCGGCACAUUAUGAUGGAGCGGGAGCGC  
>P1095  
UGAAAGGGGGAUUGAGCCCCAGGGUUCACCCACAUCGCCC  
>P1096  
GCGCUUAGGCUUGUAGGAGUAGUAGGGCCUCCAGAGCUGGU  
>P1097  
UCUUCUGUGACGUCACCCUCAUAGCCGGAGACACCAAGUUC  
>P1098  
GUCAGGAGCUUACCCAAUCCAGGGAAGCGUGUCACCGUCGU  
>P1099  
GCAGAGUUCAGAGGUCGCGGAUGGACUCCAGCGUUUCACCA  
>P1100  
UCUUGUUGAGCAGCGCCUCUAGCUGCUGUCGGGCGCGCUCA  
>P1101  
CGAAGAGGAGGGAGAGGAAGAGGGGAGAAGGAGGAGGAGG  
>P1102  
CCCAUCGCAGCCCGCCUUCAGAUGUCCGAGCGCAGCAUCC  
>P1103  
AAAAGCGCGGGCCAAGUGCGACGAGAUGAGGCUGGGAACC  
>P1104  
CACAGGUUCGGAAGGGCCCCAGGCAGACAUGAAUUCUCCUG  
>P1105  
CCACCUCACUCCUCAGCCAAGCCUCCAGGCCCCCUCGUGC  
>P1106  
GCAGCAGGGGGGGCCGUGGCAGCGGUAGCAGACCUGAGGAG  
>P1107  
CCUGAUGUUCGCUACAGCCAGAAGGUCCGUCUGGGCCCCG  
>P1108  
AGGGUGCUCAGGCCAGAUGGAGCCUGAGAAGGAGCAGGGGG  
>P1109  
UGCCCUUUCUCAGCCCAGGAACAGCAUGUGGUUCAGAGAA  
>P1110  
UCUGAGGCUGGGUUAUGGGCAUUAGAAAGGUUAAAAGAAG  
>P1111  
CCUGCAGCAGGUCAAGGCUGAGUCUGAGCACAAGAGGAAGA  
>P1112  
GCUGGCAGGCGGCCUGGAGGAUGGGGAGCCUCAGCAGAAGC  
>P1113  
GAGAAAGAGAGAGAGAGGAGAGAGAGAAAGAACGAACGAAC  
>P1114  
CCCAGUUAGACUUGGAGCGGAACUCAAGUUGAAUGAAAAU  
>P1115  
UUUCAUUCCCGUUGUUAUGGAGGUAGGCUCUCUAGGAAUCU  
>P1116  
GGGUGUGCAAACCCGAGAGAACUGGGUAAGUUGGGGUCGGC

>P1117  
CCGCGGCUGGGCUCCGAGAGACGAGUGGGAGAGCGAGUGCA  
>P1118  
GGAAGGGCAGAGGGGAGGCA AUGUCGUUCUGCAGCUUCUGC  
>P1119  
AACUCCAUCUUGGGUGGACAACACGCAGCGGCCCGGGCCCC  
>P1120  
GGGAGCCCUCUGAGAUCAAGAGCAGCUGCCUGAAGACUUC  
>P1121  
CGGGAAGGUGCGGCGUUGGGACCAGGGCCUGGAGAAGCCCC  
>P1122  
GCGGGUCUGGGACUGGUGGCACCGGCGGCGGCGUAGGACGG  
>P1123  
CGCCGACUCCAUGAUCCCCGAGGAGGAGGACGAUGAAGACG  
>P1124  
GCCUCAGCUGCAGAAGGAAGAAAGCGCCGGGUCUCCUGGCG  
>P1125  
CUAGGCCGCGCGCGGUUGCUAAGAGACGCCGGCGUUGCCCU  
>P1126  
UGC GCGGAGGCCCGGAGGCCACCCUUGAGGUCCUGGGUCG  
>P1127  
GCAGGAGCUGCGCACCGUGAAGAGGAAACUGCUGGAGGAGG  
>P1128  
UCCCCUGGAGCUGGACAUGACCCCUUUCAUGGCCUCCAGG  
>P1129  
GCCGGGCCGGACCCGGACCUAAAUGCCUCUGUUCUUCUCCG  
>P1130  
GAUUGAGAUUGAGGUUGUGCAGCGCAAGAAACAGAUUGCCG  
>P1131  
CCUGGGCCUGGGAACUCAUCAUGGCUGCCUCCUCACUUGGC  
>P1132  
UCGCCGGAGCCGGGCCGGGCAGCAGGGGCCGCCGCCGCCGC  
>P1133  
GCAGCAGGCACAUGAGCAACAGGAGCCGCCUAGCCGCCAA  
>P1134  
GCAAAGUAAAAGGGAGGAGAAAGAAGCAGGAGAAACGAGG  
>P1135  
CCGUUCGGUGCUGAGUAGAGACUGGGCUCUCUGGAACUCCA  
>P1136  
ACCAUGGCGCAUAACUUUCGAAACUCCCGUAGCAGACAGUC  
>P1137  
AGGAGCUGGGAGGAGGCGGCAGCGGCGGCGGCAGAAACAGC  
>P1138  
CCCGCGACCAAGCGAGGCGGACCCUGAAGCGGACCCCGAGG  
>P1139  
CACUGCUCCCAAGGUCAUCCAUUCCCUUGGUAAAUUUCUCA  
>P1140  
UAGCCUGAGUCAUAAAGGGAAGAAACUGAGCAGUGGGAAAG

>P1141  
GGGGGCUCGGGAGCUGAGGGAGAAGGAGGGGCUGAAGGGGC  
>P1142  
GCCUCCUGGGGCCCCAGGGACCUCGGCCUGCCCCGCCUC  
>P1143  
GGAGGGAGGGAAGGGAGGGGAGGGGGCCGCAGCCGUGUCG  
>P1144  
AGGCCAGGCGGGUUUCUGUCAGGCCCGGGAGGAGGGGCGG  
>P1145  
UGAUCCCCUUCACGGAGAUGAUUAACAGGUUUUUGGCUCCU  
>P1146  
CACCUGGGGCGCUGCGCUGUAUGGAGACUGGGGCUGCAGGC  
>P1147  
UGGUCUCUCCUCCUUGGAUAAAGUCUUGAUGAUCUCCUC  
>P1148  
AAAGGGGGCGUGAGGCACCUAGGCCGCGGCACCCCGGCGAC  
>P1149  
UGCCUGCUGUACAGUAAGUCACCGGCUGGGGAGGAGCCUG  
>P1150  
GGCGGCGGCACGGCGAGAAAGAGCUUGCCGGGGGGCGAGC  
>P1151  
GACGCCUGGACAAAGGCUUCACCCUGGUCGAGAGGGACCUC  
>P1152  
AGAACCCCGAGCCGAGGAAAGCCCCACCUCCACCCUCAA  
>P1153  
UCUUUCCACCUCUCAGUGCAGGAUCCUUCUCACGUCUCUC  
>P1154  
CGCCACCGUGGCCAGCACCAGGAUGCGGAAGAUCAUGAUG  
>P1155  
AAGGGGCUCAAGAACCUCUGAAGCGACUAAACAGGCAGGAC  
>P1156  
UCGGGUCCUCCAGGAGCGCCAGGCGCUGCCGCCGUGUGCCC  
>P1157  
GGGGGCUGCUUUGGGGGCUCUUCAGGUGGCUAUGGAGGAUU  
>P1158  
GAUGGAGCUGGAGGAGGUGAACUGGCGGAUGGAGGUGGUCA  
>P1159  
CGUAGUCACCCUCCCCUCAACUCGGCGUCAGAUAGGGCA  
>P1160  
GCAGCAGGGGGAGCCGGAGGAGGCUGUGGCUGGGGGGGCCC  
>P1161  
GCGCACCCCGGCCCGCCUCACACGCGCGCCGAGCGAGCC  
>P1162  
CCGUCGCCGCCUCUGCCGGCACCCAGCGCUCGGGGCCGCC  
>P1163  
GGAGGAGAAGAAGUUAAGGAGUUGGAGAGGCCUUUACUA  
>P1164  
GAGACUUUCAAGGAACAAGGAAUGCAUACUAUGCCAAGAA

>P1165  
GCUUCUGUUCUUCAAGGUUGAAAACUAAGCAUGGGGAAGAG  
>P1166  
AGAAGGCUUCGCCCAAAGACAUGAGUGGUUUCGUAGCGGGG  
>P1167  
CGCCAGGCUGUAGGUGUCCAGCCCGGCUUGGCAGCCAGA  
>P1168  
AGGACACCAAGGCUUAGAGCACAGCCCCGAGGCGCCGUCUA  
>P1169  
GGGUGAGCAUCAAGGCCCCCAUUUCUCCUCACCACGGGGUC  
>P1170  
GGAGCCUACAAGGAGUCCUCAAAGACCGGCGGGCGCGCG  
>P1171  
GUUCCCGCUGUAGGUUCCCGAACACAUCCUGGGAGCUGUAG  
>P1172  
UCGGCCUCAUCGCCUCGCUCAUCCACCCCACGGCUCAC  
>P1173  
UGGGCUUGGCCCGGAGCCGCAACGCAUUCGCGCUGUACGAG  
>P1174  
UAUCGACCCGACUCGGGAGAGCUGACACCCGAGCAACUGC  
>P1175  
UUCUUGCCGUUGCUCUCCUUCAGUCUGCAGCUCGCGGGACA  
>P1176  
AGCGUCCAGCCAGGACAAGCACACCUCUCCCAGGUUUCAUG  
>P1177  
UCUGGACCGAGGGCACAGUCCACCUUCCUGCCACAUCCU  
>P1178  
AUUGCUGUACGAAGGUCAGAAUCGCUACCUAUUGUCCAAAG  
>P1179  
CGGCACGACACCUGGCUCCCACGCUGAAGUACUCGCCCGG  
>P1180  
ACGAAGGGGGCAGCUGGAAGAUUUGGUCUUGAACUUGGGGG  
>P1181  
CUGCUGCCCAAGGACCGCGGAGUCGGACGCAGGUAGGAGAG  
>P1182  
GGAAGUUCUACACUCGCCUCACCAACAGCCGACACGGUGAG  
>P1183  
AGAGCUCAUGGAGCUCGCGAAUGUAAUACGGAGGCCUCUGA  
>P1184  
GGAGAACCACUGCGGGCUGGAGCAGCAGGCUGCCAUGGCC  
>P1185  
UCCAACUCCCGAACAGGUGGAGAAACAAGAUAGGAGUACUC  
>P1186  
GAGCAAGCAGGAGCUCAUCAAGGAGUACCUGGAACUGGAGA  
>P1187  
GCUGGAGGACACAGAGACCAAGAACGCUGUGCUGGAGCACA  
>P1188  
GCGCGGGAUGCGGCUGAAGCAUAGCAUGAAGCGGUCCUCCU

>P1189  
GGCUUUAGGGUGGGUGCUGCAGCAGCAUUUGGGGAAGGG  
>P1190  
AGGAUGAGCACAAGCCUGGGAGAUGGCAGUGAUGGAAAUGG  
>P1191  
GGGGCCUGAGGCACUGCAGAAAGUGGGCCUGAGCCUCGAG  
>P1192  
UCCAGUAGGUUAUUGUUGGUCACCCACCACUCUUCGCCGUG  
>P1193  
AAACCAGCAUCCACCCAUC AUGCCUGCCAUCUCCUCCAG  
>P1194  
CACAGCAGGCCCUAAGCCCGAGUCCCGGCCUCGCCGCCGCC  
>P1195  
GCUGCGAGAUGGAGGCGAGCAGGACACCUGGGCAGGCGAGG  
>P1196  
UCCUCCUUCUGAAAUGAGACUUUCUGCCACCUUCCCUUC  
>P1197  
ACCAAAGCCCAUUGGAAGGAACAUCUGAUGAGGGACAGA  
>P1198  
CGAGCUGAUACUGAAGUACA AAAUAUCAAGAGGCUGGAGC  
>P1199  
UUUUCUUUCUGCAGACUGAAAAAUGCAGACCGCCGGGG  
>P1200  
GAGUUCGGGGAGAGCCAGGAGAAGUGCCCGCGGCGCGCAG  
>P1201  
AGCCCUUUUUUUUGCCCAACGUCUGUCCUCAGGGCCGCU  
>P1202  
CACGAAUCGGUCAAGAUGACAGCUCUGUGCCAGCAUCC  
>P1203  
CUCCUUCAGGGGAUGGGGGCAUCUGGGGAUAGGAAGGGG  
>P1204  
GAGUGUGGAGGAGAACAAGGAGCGCAUGGAGAAACUGGAAG  
>P1205  
GCAGACAGGGCCAACGUCGAGCCGAAUUCUGGUCUGGGG  
>P1206  
GGCCAAUGGGGCCAGGGAGACCGUUGAGUCCAUCUUUGCC  
>P1207  
GGACCAGCAUCGCCUUUAGCACAGCAUCCAGGUUCGCC  
>P1208  
GUUUUUGGAGCUACCACCCGACUUCUUGGAUGCGUAUCUGA  
>P1209  
CCGCUGAACUGACAAGCGACAUUUCAGCUCCUUACCCGC  
>P1210  
GCGGCUGGGCGGCAGCAGCCAGAGCGGCCAGAGGCGCCGC  
>P1211  
GGAACAGCCGCCGAAGGAGCACCAUGAUUUCGGCCGCG  
>P1212  
AGGGAAGAGGAAGAAAGAGAAAAGAAAGGGCUCGUGACAG

>P1213  
GGUUUGAUCGCAAUGAAGGUACGCUCACAGUUGGCCAUGGU  
>P1214  
CAAGCGGAAGAGGGAACGGGAGGAGUCGCCAGGGGAUGCGC  
>P1215  
AGCGCUUGAUGAUCUCGCCCACCAGGCCGCGCUGCACGCCG  
>P1216  
AGAGCGGCCGGACGAAGAGCAGCGAGAGGAGGGGAGAG  
>P1217  
UCCAAGCCUCCUCAUUUCUAUCCAAGCUCUCCUCAUUGCC  
>P1218  
GAGCCCGGGCGGGGGGAGGAGGAGGGGAGGAGGGAGCGG  
>P1219  
CCGCCGCCUCGGCCUGUCCACGGCCGCUUCGAGGAAACUC  
>P1220  
GACAGCGGAAACUCACCAAUCCCGCUGCAUUUCAAGCG  
>P1221  
ACAUGGAGGCGGAGGUCGAUAAGCUGGAACUGAUGGUGAGU  
>P1222  
AGGGAGAGGAGGAGAAGGGGAGGGGGAGGCUGGGCUCAGC  
>P1223  
UGAAGGGCUGGAGGCGGUGUAUGCCGCUGUUCUUGCUGUCG  
>P1224  
GCCACGCGGGCGCACGGCAGAGGCACGGCCGCCUGCCUC  
>P1225  
AACGGCGGCCCCAGUCCUGCACACAAGGCCGGGGAAGUAGC  
>P1226  
GCCCCUUGC GGCGGUCAUCACAGCCCAGCCUCGGGGCUGC  
>P1227  
CAUGGUGGCCACGGGGCCGCAGUACGGGCGGGUCAACAGU  
>P1228  
GAACCACAAAGCAGCCUCUAAGGAGGAGGAGGAAGAGGAG  
>P1229  
AGUAUAUAGAAAAGCGUGCGACAAGUCGCUGGAAAUGGCCU  
>P1230  
CAGUCCCCGCGGCUUCCGCCACGUCCGUCCUCCUACAUC  
>P1231  
UUUCCCCGGGCAACGACUCCACGGCGUCUCAGGACGUGGCC  
>P1232  
CGCUCUGCUCACGCCUAGGAGUCCUUCAGGCCCGGCUC  
>P1233  
GGUUAUGAGACAAAGGGAGAAGCUAAAAGAUGGGGGAAGA  
>P1234  
GCCUGCCGCGUGGCUGUAGUAGGAGCUGGAGUUCUGGUGGU  
>P1235  
CGUCCCCUCUGCCACUGGACUUGGACUUCAGAUCUGACC  
>P1236  
AUCAAGGACUCCUGCUCACAGCCCCGACGAAAGGAUGCCAA

>P1237  
ACCUGGAACGGUCACAGGAAACCCGGGCGCGGGGUAGUCGG  
>P1238  
GAAGUCUAGGAUGGGGUCGGAGGAGGAGGUAGACGAGGGCG  
>P1239  
GUGGGGACAUUUGGCUUUGAACUCAGAGCUGCGCCUUUGGG  
>P1240  
ACGCCGGGCGCUGCACAAGCAGAAAGACGGCACUGAGUUCA  
>P1241  
UGACUGGGUAGCUUUUGCAGAGAUCAUACCCAGAACCAA  
>P1242  
CCGCAGGAGGCCGGCCUCGAGUCGGCCAGGACGCCGUCCA  
>P1243  
UUCGGGGUACCCUACAGUGACUGUUGGCUCGCCAUCGAGC  
>P1244  
GGAGGGGACGUGAAGUGAGGAGGGGGUUGGGAGGGGAGAGG  
>P1245  
UUCUGUUUCUCCAGGUCUCCAGUGGGGGCUGCAGACUAAGC  
>P1246  
UCUCGCAGUUUACGCGGAAGAUUCAGAGCCCGAGUCUGAUG  
>P1247  
GAGGUACAACUGGAAGAGCUAGAGGGUGAGAACUGCCAGGG  
>P1248  
CCGCAAACAGCUGGCCACGAAGCCGCCAGGAAAAGCGCUC  
>P1249  
GCGGCGGAGUGAUCGUCAAUAACACCGAGAGGUGAAAACAC  
>P1250  
CAAGGUGGAGAAGAAUCUGGAAAUGGUCAAGGCAGCCCAGG  
>P1251  
GUGGCAGUGGCGGCGGCGGUAGCGGCGGUGGACGUGGUGCC  
>P1252  
AAGGAGAGAUCCAGCUGCCAGUCUGGGGGUAGCAGACUG  
>P1253  
GCAGUUGCUGCAGGCGGCCACUGGCAGUUCGAGGUGCGAG  
>P1254  
GGGCAGGCGUGCCACUCGGAGAAGGACAGCUAGAUC CAGA  
>P1255  
CGCAGUCCGCAGGAUGACUCAGGGCAGCCCUGACCACAGUU  
>P1256  
UAACCCUACCUACUAGCCCUACCUACUAGCCCUACCUACUA  
>P1257  
UGAGUCUGGUGGAGGAGCUGAGGGAGGGAGCCAUGGAAGGU  
>P1258  
CAAGGCGGGCGGCUCUUCGACCUGCGGCGCUUCCUGACGC  
>P1259  
UGGAGAAUCAGUACUGUCCCAGCCGAUGGGUUGUCCGACUG  
>P1260  
UAGAGAUGCGGUGGUCCUUGAGAAAGGGCUGCCAGGCAGGG



>P1261  
AGGCACUAAGAAGCUCGUCUACUUCAUCGACGACAUGAACA  
>P1262  
CCCUCCACCACCCGCCCGUCAGCCUCGGUCUUGCAGGCCUU  
>P1263  
UGUCCCCACAGGGCUGUGUCACCUGCUCCCCAAUCAUCCAG  
>P1264  
AUGAUUCCUUGGUCCAUUCAGCAACGUCAAGGUGGUUCUG  
>P1265  
AGCUCACCUUGGGUUCUGCAACCAGCAGCCACACCCAGAA  
>P1266  
GGCGCUCCCCAGCCUGCCCCAGCAUCCGCUCCAAGUGCUC  
>P1267  
CCGACUCCGCCUCGCCGCCAGCACUGGACAGAACCCGUCA  
>P1268  
GAGCGGGUGUUCGCGGCCGAGGCCUCCUGAAGCGGCGCAU  
>P1269  
GCGAGCAUGC GGUCUGGAACACUCUGGGCCACCACCAGGAU  
>P1270  
GGCUCCUCCAAAGCCUCGGACCUCUGACCCUCACCCCCG  
>P1271  
GCACUCCGCCUCGUGCACAACCUCAACUUCAAGAUGCCCU  
>P1272  
CAGAGGUGGCAGAGGAGGCCAUGGAAACAGAAAGUUCUGAG  
>P1273  
GCGACACGGAACCACGGAGGAAGGGACAAUGUGGGCUUUAU  
>P1274  
GAAGCAGCAGCUGGAGCUGGAGAGGCAGGCGUGGGAGGCCG  
>P1275  
GGGCGGCCGCCUGAGUAAGGACUUCUGCGCGGGAGUUCG  
>P1276  
GGACGUAGCUGACCCGCCCGAGCCACUGCCCACUGAAGAGG  
>P1277  
UCCGCUGCAGGCUGAGCGGGAGCACGAUGCACAGCGACACG  
>P1278  
GCCUGUGAAUCUCCGAGCCCAGACCCGGAAGAGCCGCAGAG  
>P1279  
CGUCGGCCGAGCCUCACCUGAGUCAUCUUCUCUCUGUUGGC  
>P1280  
AGGAAGGCCUUGAGGUUCUCAUCAGCCACGUGCUCUCCAG  
>P1281  
AGGUACUCGGGGGGCAGCUCAGUGGUGGAAGUGGCCUUUC  
>P1282  
CUCCCGGGGAACCGCGUGUGACCUUCCAGCCCGCGGACCGA  
>P1283  
GCUACAGCUGAGAGGGGACGAGGCCAGGAGGAGCUCAGCCA  
>P1284  
GAGCAUCCAGGAGAUCCAGGAGCUGGACAAGGACGACGAGA

>P1285  
CCAUCCGGAACCGGCCGGCCAU CGCCCGCGGCGCGGCCGGC  
>P1286  
AGCACCUGCGGGGCCUGUCCAGGAGGAGAUCGUCCAGCUG  
>P1287  
CCUCGUCCCGUGCCUGCGCCAGCAGUCUCAGCUUGUCCUCC  
>P1288  
AGGGCCCGCUUGCUGCGCGCACCUGCCUUCUCCUUGCUC  
>P1289  
GCCAAAGCUGCAGGGCUUCGAGUUCUGGAGCCGCACCCUGC  
>P1290  
CCAGGGCAGGUGGGCUGGGCAUGGCGCAGCGAGGAGCAGAC  
>P1291  
GUCUUCUUAAGGAGCUCAUCAGGAGUUUGGGAUCGGCUA  
>P1292  
UGGAGAGAGAGCGGAAAGUGAGUAUGCGGCUGCACCGCGGG  
>P1293  
AGAGCAGGAGUGCGGUGAGCAAAGCCAGCCCCAGGCC  
>P1294  
UUUGC UUUUAAGGAAUGUAGUAAGAAAACAAAACUGAU  
>P1295  
AGCCGGAGCAGCCGGAGCUGAGCGGAUCAAGACAGAAGAC  
>P1296  
CCCCACCUC CCGCAGGUCG AUGACCUUCAUGGGCCUCGGC  
>P1297  
CGGCUGCCCCGCGCGCCCCAGGCCGCCGCGCCGCGCCCC  
>P1298  
CAGUUCUCCAGUUUUUCCA AUAAAUAUUGGCCCCCGAGG  
>P1299  
CGGCCCUUGCCCCCGCCGCACAGGAGCGGGACGCCGAGCC  
>P1300  
UCCUUUCCUAAUAGGACUUAACCACCACCAUGUCGAGCAA  
>P1301  
GGGCAUGGUUCUAGGUCAGGAGGUCCUACAUCAUGACAGCC  
>P1302  
CCGCCACGGCCACGGCCGGCAGCUCGGGUCCCGGGUCCCGG  
>P1303  
ACAGCCGCAGGAUCUCCUCCAGGCUCAGCGGUCCCGGGAG  
>P1304  
CUGCUGGCCACCCACUGCGACCAUGUUCGUUCCUGCGGG  
>P1305  
CAAAGCGUGGGUCCGCGUGCAGGAACCCGCCGGGCUCAGCC  
>P1306  
GAGAGACAUUAUCGCCUAGGACCCCUUCUCCUCUGCCACG  
>P1307  
AAUACUUCACAAAAAUCC AUGGACAAGUCACUCGAGUUU  
>P1308  
UCGCGCGGGCCCCGAAGCGGAUCCGUUCCGGGUGUCUCU

>P1309  
CGCGAACACGCGGUGGUUUCAUUGGGUUGGCUGCCCCUCGG  
>P1310  
GCUGCCCGGGCCGUAGCCGUAGGCUAGCCGCGGUGCGCUCG  
>P1311  
AUUAAACCUACCUUCCAUCAAUAGCAUUACCAAGGGCAUC  
>P1312  
CGCGGACCACGGCCGCAGCAACGCGCACGGACAGCAUCUUU  
>P1313  
AACAAAGCCCCGGCAGCGAGCAGUGGGUCGCGGUCAGAGCCC  
>P1314  
AGGAGGCGAGCUGCGGGGAGAAGGGGCGACGGACAGCCGAG  
>P1315  
GGGAAAGUAUGGCUGCGAUGAUGGCAUUUCUUAGGACACCU  
>P1316  
GAAGGCCUCCGUAAGCUCCAAAGGGCGUUCGCUUAGCAGCA  
>P1317  
GGAGGAGGAGGAAGGGGAGGAGGGCGAGGCGGGAGGUGCAG  
>P1318  
CUGGCGGCUGGCAGCAGCACAGACCCCAGGGACCCGCCCGG  
>P1319  
CGGCGACGACGACGAGGAAGACGCCGAGGCCUGGGCCAUGG  
>P1320  
AGAAGACGAUCUGGGAGAGGAAGGAGAGAUGCUCAGGAAGG  
>P1321  
CUGAGUCUCACCCACCUAGCACCAUGCCUGCAGUGGCCUG  
>P1322  
CGAGAACCACCGGCCUCCCCAGUUUGAGGGCUGUUACCCCG  
>P1323  
CCACCUGGGAAGGAAGGCCACUAGGCAAGGCCUGUUACC  
>P1324  
CUAUGCCCCGGACACAGAGGAGUUGGAGGCAGAGAGAGGAG  
>P1325  
CGUCGGGGUUCGCGGGGACCAUGCAGCGGAGGUGGGUCUUC  
>P1326  
ACCAGAAUGACAAAGGCAAGAACGUCCGCCAGAGGAACUCU  
>P1327  
GGGCGAGCUGGAGGAGGACGAUGACGACGAGGAGGAGAAGC  
>P1328  
GUGCGGCCCGGAGGCGGCGGAGGGCACCCCGGGCGGGCGGC  
>P1329  
GGCAUAGGGACGUGGGGUGCAGGCGCCAACAUCAGUGGCAG  
>P1330  
UUUGUGCGAGAUGCAGCCUCAGAAGGAACAAGGCCCCCAGA  
>P1331  
AGCUCGUCCUGGGUCACCAGAUAGCCACGGUCGUGGCACAG  
>P1332  
AGUGCCGGUGGAAGGCUCCAAAGGGCGUGGGCAGGGGCUCGG

>P1333  
CGAUGCGGCCCCACACGCGCAGCAGCGCGCCGCACAGCAUG  
>P1334  
CGGCAGCCAGCCCUGCCCAGACACCAGCUAUGCCCCCGUGG  
>P1335  
UUCAAAGGGCGGGCGGGCGCGACCGGGACGCGGGCGGGUAA  
>P1336  
CAUGGCAUCAGAUGAAGGCAACUUUUUGUUGGAGGGCUGA  
>P1337  
ACUACGCCUUCCACAGAUGAUCACGCCCCUGGUGACCAA  
>P1338  
GCGGCUUUGGACGAGGGCAGACCACAACGUGCAAGGGUUC  
>P1339  
UCGGGGCCAUGGACGGCCUGAGGCAGCGCGUGGAGCACUUC  
>P1340  
AGGACUACGGCAGGGGAUGCCACCGCCUACCCGUCGCAAG  
>P1341  
AGUACUGGGAGGUCCCCUUC AUGCCCGAAGGGGACAGGGGC  
>P1342  
GUGCCCGCCUGGCCCCAGGAGAAUGAACCAGCCGCAGAGG  
>P1343  
CCCUUCCUUCUCUCUGGCGAGCAGUGGCUAUUGAGGAUC  
>P1344  
AGUCUCGUGGAGGAGGAGCGACCGAGUGGCCUUGGUGGUGG  
>P1345  
GGGGCGCACAGCCGGGGCGCAGCCCGCGCCCCCGCCGCGA  
>P1346  
UGCAUGUGUCUACACCAGACCGAGGGCGGCCGGCUCCA  
>P1347  
CAGAGGACCCACACAGAUGGAGGGCGUGGCGGCACAGGACG  
>P1348  
CCCCCAGGGAUGCCACUCCAUUCCUCCGCCCGUGGUCUG  
>P1349  
GAUGCCGGGCCCUCCAUGCUACAACCUCUUGUUCUUGCUCA  
>P1350  
CGGUCGCACAACUUGGAGCGAGUUGCUCGGUUCCUCAUUU  
>P1351  
UGCACUUUCCUGGAGUGGAGCUGCUGGAAGGCGGACCGG  
>P1352  
GAACGUCAUCAUCUCCACCUACGGCGAGGGCGAGAGCGGCC  
>P1353  
GAAGCUCCUGGAGGAGGAGGAGAAGAGGGUGCAGAAGGAGC  
>P1354  
CCGCGCACGCUGGGUCCCCAAGCUGCCUUUGCCGCGGCCGG  
>P1355  
AUCGCCCCGGCGGCAGCUCGACCUCCUCUCAGGCGGGCGGAG  
>P1356  
AAGAGAAGGAGCUUAAGGAAAGGAGAGGCGGGAGAAGCGG

>P1357  
CCCUCGGUCUGUUCCCAGGGAAAAGGCCACAAAGAGAAGC  
>P1358  
GGAGGAGGAGGAGGAAGAGGAGGAGGAGGACGCCGACCGCG  
>P1359  
CGGGGAGGAGGCCCCCCAGGAGAAGGCGGAGGACAAGCCCA  
>P1360  
CCUUCUGCGGAGGGACGAUGAUGAGCCUGGCCCUUGGACGA  
>P1361  
UGCACGCCGAGGGCGGGGGAGAGCGCGCCGUCUCCCGG  
>P1362  
GCUGGAGCGGGAGCGCAUGGAGCGGGAGCGGCUGGAGCGCG  
>P1363  
GCGUCCUGAUGGAGCGGCUCAAGAAGGUGAGGCGGCGGG  
>P1364  
GAUCCGACUGGAGGAUGGACAGACGGCGGACGGGCAGACGG  
>P1365  
GCCGGAGGCCUGACUCUGGGAGCACGCAGUGAGUGGCCCC  
>P1366  
GUAAA AUGGCGGACCUGGCGAACGAAGGUAGGGGAGGCGCC  
>P1367  
AGCCAGCCGGGCCAUCCUGCAGCGUGCAGGCGGCCGCCU  
>P1368  
GGUCAUUGGCCGGAGUGGAGAGAUGAUCAAGAAGAUCCAGA  
>P1369  
CCGGCGCAAGGCCUUCUUGCACUGGUACACGGGCGAGGGCA  
>P1370  
CCGCCGCCGCGUCCACCCUCAGCGCCACCGCCAUGCGGGAG  
>P1371  
GCUGCUGGUUUUUGCCGGGGAUUUACUAUCACGUAGUAGUG  
>P1372  
CCACUCCGGCCCCGAUCAUCACGCCAAGCACCUGAGGGACG  
>P1373  
GCAGCAGCGGCGAGCAGAGGAGGCGCGGCGGCGCAAGCAGU  
>P1374  
GGACUUCACACAGGUGUUUGACAGCUACGCCCAGUUCGAGG  
>P1375  
UAUGUUCUGGGUUUCCAAUCAGGCCGAGUGGUUUGAGGACG  
>P1376  
CCAGACAGAGCUGUGAACCAACCCCGCUCACGGCUAACAAG  
>P1377  
GGGCGCAGGCGGAAGCUGAAACGCGCGGGGCGGGCGGCACC  
>P1378  
CAGCAGGGGCAGAGCUAGGUUUUCAGGGGCGGGGUCUUC  
>P1379  
UCCUUGAACUUAUCUCCCGCAACUCCGUUCUCUUCGGAG  
>P1380  
CCGGGCCGGGACCGGGGCCGAGGCGAACCGAGGGGCCUGUG

>P1381  
AGGAAGCGUCCCUGGGAUCGAGAGGAUGGGUCCUGGCAUUG  
>P1382  
UCCGGGGAGGAGGUGGCGAGAGGCCAGCAGUGCCCCGUUG  
>P1383  
CCCCCGCUUUGUGUAGCUCCAGCUAGGAUGAUCGAGGUUGU  
>P1384  
CAUGCAUACCAUGGGGGCCAAGCUGUUGAGUACCAGGAGG  
>P1385  
CCUGGCCUGGGCUCCCUGGGACUUGUCCUUGGUCUUGGGAA  
>P1386  
UCCAUGCAGCCCAACCGCAGAGGUGAGGGGCACCCCGACGC  
>P1387  
CACGAAAGCCACCACCACCAAGCUGGUCUACCAGAUCUUCG  
>P1388  
GUCCUUGCGGGGCUUCGAGCAGGAGCGCGUGGGCCUGGCCG  
>P1389  
AGGAGAUGCGCAAGAAGGAGAGAGCAUGCCCUGGAACGUG  
>P1390  
AGAGCUCAAGCAGCUGAAGAACCUGAAGAGGAAGGAGAUUC  
>P1391  
CAACCGCUACCGGGAGCGCGAGGAACUGCAGCGGCGUGAGU  
>P1392  
CCCGGGCCGCCGCCACUCAGCCGGUCGCCGGCGCGAACC  
>P1393  
ACGAAAACCUACUUACCCAGCCCUUCUUUACUGUCGUC  
>P1394  
GGUCUCUCCUUGCAGUUCAGAUCCACCAAGCACCACCUAU  
>P1395  
CGGCUGAGGAGACCGAGGCGAGCCAGCAGUGGUGGCCCU  
>P1396  
CGUGGAGACCCCUAUGGCUACCGCCUGGACCUGGACUUC  
>P1397  
GCCACGCCCCUGCUGCGGGACCUGUACACCCUGAGUGGAC  
>P1398  
GGCGCUCCAGAAGCCGCCGAGCUCGGCUCAGCCAUACGCG  
>P1399  
CGCUGCCGCCGAGGGAGACACUGUACACCGCGCCGUCCUC  
>P1400  
CAGAGCAGCUGGCUGCUGCCAGGCCAACAGGAGCAGGAG  
>P1401  
UCUAGUGCCCGUGGCCGGGAAUUCAAGCCGCGUCCCCA  
>P1402  
AACGAAAGCCGCCUCCAAGAGAAGAUGACAGGCACCCUC  
>P1403  
UACCACGACGACUCAUACACAGCUACGGGAUACGGCCGGGC  
>P1404  
CCUCUUUGAAGGCGCAUCAACCACCGCUGUGGCCUUGAAG

>P1405  
UUGUCCUCCUCAUCCUCCUCAUCCUCAUCUUUGUCCUCAUC  
>P1406  
CCGGCCCCUCUGGGACCCAGAGC GCGGCGUCCGCUCCGCCA  
>P1407  
AGCGGCAGCCUCUGAAAAGAAUCGGGGCCCAAGAAAAGGCG  
>P1408  
GAGAGACCCGGAUGAGGAUGAGGAGGAGGGGACGGAUGAGG  
>P1409  
AAGCAGGUUGCUGGGCCCAAAGGGAAGGCCCCUCCUGUGCC  
>P1410  
GGGCUCAGAGUGCGCACGGCAGC GGCUGCCAGAGGGUCCUG  
>P1411  
CACCCACUGGGUGCGUGGUGAGGGGUGCCCGGCGGAGCGGG  
>P1412  
CCCGCCGCUUCUCCGCUGGAGCAGCCUCCGCUCCCGCUCA  
>P1413  
UGGCCCGGGACCCCCAAACAGAGUUCSCCCACCACUGAG  
>P1414  
CGUUCUGCUCUGGGGGCCGGAUCACAGGCCUCCCGACAUC  
>P1415  
AGAGGAAGUGGAAGAGAAUAAAAAAAGCAAAGCCAAGGAAC  
>P1416  
GUCGUUCCUGAGCCCUGUCCAACUCCUCCUCAACGAGCUGG  
>P1417  
CGAGUCCGGCGGCACCGACGACGACCUCAACAGCGUGCUGG  
>P1418  
CUUCGACUACCCCCAGGGGGACUUCCUGCCGGUGAGUGUA  
>P1419  
AUGCCGCAGAUGGAGGCUGAAGUCAAGGCCACGCCUCCACC  
>P1420  
GUGCCAAGAAGAAGGAUAAAAGAGUUCAAGGUAAGCAGUGU  
>P1421  
GAGGCGAUGGCAGCGGAGAAACGGGACCCGGACGAGUGGCG  
>P1422  
CGCCGCUCGCCACUGCCGCCAGC GCCGAGCCCGGGGGCUG  
>P1423  
CCCCGCAUAUGUGGUCCGCACCAUCCUUGUCUACAGCCGU  
>P1424  
CCGAGGCGGCGACGGAGGAAACAGAAGAUGGUGAGGAUGGC  
>P1425  
CUCCACAGGCGCCUCCUGCCAGGUCUGCUCUCCGUCGCCC  
>P1426  
CAAGGAGGAGGACGAGGACGACGAGGAGGAGGAGGACGAGG  
>P1427  
CCAGAAUCCUAUCCCCAGCAGAAGCUUACAGCGCUUAUCC  
>P1428  
CCACUCACUGCAUCCUGGGAACCUUCGCCUCCUGCAAGGCGUU

>P1429  
GCUGGGGACACGGUUUGGACACGCGGAGAGAAGGCACACGG  
>P1430  
ACGGUGGCCGCGGUGGAGCCACGGGGCGGGCUUGGCUUGGU  
>P1431  
GCCCAGGCCUCGGACAACAGAGAGAUCGACAAGCGCAUGAA  
>P1432  
CGCGGGGCGAGCUUCUAUUCAGGGCCGCGCGUCUCGUCA  
>P1433  
GCUGAAGACGGCUCAGAAUCCACCCCAUGGUGAGUACUCAGU  
>P1434  
CCCUUUGCCUCCGAGAGCUAUGGAGGUGGCAUGCGACCCC  
>P1435  
CCUCACUGGCAAACCAUCCACCCUUGAGGUCGAGCCCAGU  
>P1436  
UGCGCACGUGGCCGGCGAGCAGCGGCUGCCUGCGAGGCCCG  
>P1437  
CGAGAAGAUCGCGCUGCACAUCAGAAGCAGCGGAGGAGA  
>P1438  
GGUCGGGAGCGGGGAGGGGAAGUGGAUGUUGGUCAGGUCGG  
>P1439  
GGAACCGGCCCGAGGGCCCUACCCGGAGGCACCAUGAGCGU  
>P1440  
GCUGUCAGGACCAUGAAGCCAGGACAGAGGCCAGGAGCCAG  
>P1441  
CGACGUAAAGAACGCCUUCUACAUCGGCAGCUACCAGCAGU  
>P1442  
CGGCGGCGUUGGCCUCUCGCAGGGCGCCUGCCAGCUUGUUG  
>P1443  
CUUCCUGGUGAAGGAUGUUCUGUUCAUUUUCCAGAUUUA  
>P1444  
GGCGCUGCGAAACAGCUGGAGAAGACGCUACUCGAGAUC  
>P1445  
UGCUCAGUGCCCGUAGAUCAGGGUCCAAUCCCUAUGGCC  
>P1446  
AACUCCCCGAGCCAGCAUCCACCACAUCAAACCCACUGAGU  
>P1447  
GCGCCGGAAGCGGUCCGAGAUUGAAGAGUAAGCGGGGCCGC  
>P1448  
GAAGGAGCGGGACACCAUGAAGGAGGACGGCGGCGGGAGU  
>P1449  
GGUGGGCAAGGACGAGGGCGAGGGCACGGCCGGGUCCUGGC  
>P1450  
GGUGCGGCCCGAGCCGACCCAGGCCUCACAGCCCGCGAGUC  
>P1451  
AAGGUACCACCUCUGCCACCACCACGCCUCUGCCACCACG  
>P1452  
UGGCAAUGUGAGUCCAUCAUGUUGGAGACAUACCAGACG



>P1453  
CUCCUCGGCCCCAGGCGGGGACGGCCCAGGAGCGGAGGAGC  
>P1454  
AGCGGAGGCGGAGGGACAAGAUCAACAACUGGAUCGUCCAG  
>P1455  
CCCCAUCUCUUCGACCGCCCAGCAACCCAGUUCCCGCGCUU  
>P1456  
CUGGGACCUGCAUCGCUUCUACUGUGGGGACCGUGGGGACA  
>P1457  
CCUGGCCAUGCCAUUGCCCGAGCCUGAGCCCCUGCCCCUCC  
>P1458  
GGCGACGAGAACGGCGAGCGAGGGGUCGAGCGCGGCCGGGG  
>P1459  
GCAUCUAUGUCAACAAGAUCACGCACGAAGUGGAGUGAGUG  
>P1460  
CACUCUAACAAGCUCUGUCCACGGGUCUCCCCAUUCCCACC  
>P1461  
UCUCUUCUUGGCUACAGAUGAAGAUUCGCCCCGACUCGUCG  
>P1462  
GCCAGCUGGAGAUCAACUUCACACGCUGCAGACCAAGCUG  
>P1463  
UGUGACGUCUGCGCAGAAACUGUUCUGCAUGUCCAGCUCA  
>P1464  
CUGAAGCCCUUGAGGCUGUCACCGACCGCUCUGUCCCGUCA  
>P1465  
CUGCGUCGGCAGCUUUUCCCAGCACGCGACCCCAGCCAUG  
>P1466  
CUUUCACCUUUGUUCUGGGAGGCAGUCGAGGGGCUCCCCG  
>P1467  
GGCAGUCAGAUCCAUGGUGUACGGUUGGCCAUGAGGGGUG  
>P1468  
GCGAGAAGGAGCUGGAGGACAGGGAAGGGCCGGCCAGGCCU  
>P1469  
CAGGCCGGUCUGGGGCCGGGACACGGACAGUGCUGGGAUUCU  
>P1470  
ACUCCACGUCUCCACUCCGAGACCCAGCCCCACACGCACC  
>P1471  
GAGGAGCCACAAUGGGGCAGACAGAAGCGGGGGCGCGGGGA  
>P1472  
GCUGCCGCCGCCACCACCGCAGCAGCAGUCGGGGAGCC  
>P1473  
ACUUCGGGGGACCGGUGGACAGCUGGGCCAGACUGUUGGUU  
>P1474  
GGUCGUUUGCACC GGAGGUUACCUUCCGACAGGGCCGUAGU  
>P1475  
UUGGAGAAACCCAGGGCUAAAGUCACGUUUUCCUCCUUUA  
>P1476  
CACCCCCACCGUCAGCAGCUACAGCCUCCACAGGUGAGAG

>P1477  
UCGCCACGGCCUCCAUCCUGAUUCUCUCGGACUUUUAACC  
>P1478  
GCAGCCAGGCGGGUCCUGGGAGAGGCGCGAGCCAGGCCUGG  
>P1479  
UGCUGGUUCACGUCUUUACAGUAACUCCAGGCAUCUGAGG  
>P1480  
UCAGCAGCUCUGAGAACGGCAUUGGUGGCCGAGAGACGUCU  
>P1481  
GCCGGUGCCGCCUGGGCCGGAGGCCGAGCCUCCGGGGCCGC  
>P1482  
GGGCCUGCAGGUACCGUUUCAUGUCCUCAGGGCUGAAGGAG  
>P1483  
CCGGACCAUGUAUUCGGCCCACAGGCCCCUGAUGCCCGCGU  
>P1484  
AGCUGACCCCGGUGCCUGUGAGCACACCAGCGGCCUGGUG  
>P1485  
CCCCCCAAGCCUGGUCUACACUGUGGCCACCAGCACAACC  
>P1486  
CCUUGCGGAGUCUCUGGCGAAGACCCUCUAGGCGAUCCCGU  
>P1487  
CAGACCCGCGCGCUGGCUCAGCUGCCGCCGGGCGACCCUC  
>P1488  
CGAGCGGGCGCCGGGAAGCGAGGAGACGCCCGGGAGGCC  
>P1489  
UCCAGCGGGCGGCAGCGUGAAGCCCGCGCGAGGGCGGAG  
>P1490  
AGGUGACCAGCAAUGGCAGCAUCGGGAGGGACCCGCCAGCG  
>P1491  
CGCGACUCAUGUCCCGCCGCAAGGCCGGCAGCGCGCCCCGC  
>P1492  
AGGAGAACUGCUCGGGUAGAUAGUCGUACGGGAAGUAG  
>P1493  
UCUGGCAUCCGGCUUCCUGACUCUGCUUCUCCUCUUCU  
>P1494  
AGAGGAGCUGCAGAAGCGAGAGGAGGAGGAAUUAACACCG  
>P1495  
GCUGUGCAGAAAGGGUGCCUAGGGCGUGAGCCUCUGGGAGA  
>P1496  
CGCUCGCCAUGGCUGCUGUCAGCUUGUCCCAGGAAAGAAG  
>P1497  
GAUCUGGUUCUCUUCGAAUGAGAAGCGCGGCUUGCGCAACC  
>P1498  
GCGGCGCCAAGUCACCACGGAAGAGCGGGAGGUGCUGGCGG  
>P1499  
CAUCCAGCCUCAGUGUCCAGACCCAGGCAGCCCGGGUC  
>P1500  
CCAUCGCCGCCGCCCAUCACGCCUUCGCCUCCUCCGUG

>P1501  
UCUUGGGCUGGUUCCUCCUCAUCACCUUCUUCCACCUCGAU  
>P1502  
CCGGCUCUGGAGGGAAUCGAACCGUCCCGAGACGGACACAC  
>P1503  
CCUGCGGCUGCUGGAGGCCAGGGGCAGGGGUGUGCUGACC  
>P1504  
GCAGAGGAGGUGGAGGAUGGAGGGAGGUGGGGGCUGGGGG  
>P1505  
GGGCCAGGAGCAGGCUGGGCAGUUCCAGCCACAGACACGUG  
>P1506  
GGAGCAGCAGCGGCGGGAGAAGGCUGUGCACAGGCUGG  
>P1507  
GGGCGUCCGCUCCUCAGCGGAUGUGGCAGCCCCGAGCCAUG  
>P1508  
UUUCAGAGCCUGAGGUGGCCACGAAGCAGGAACUGCAGGAG  
>P1509  
CUUUUAUGCUCUCUAGGUCAUUUUUCCACCCCAAGAAAGA  
>P1510  
AAGAGAUUCAUGGCUGGGGAACCUGGCAGGGCUGAGCGGG  
>P1511  
CGAACUCGGUUGAUGCCACCAUAGUGGGGCACCAUGGCCAG  
>P1512  
CUCUAGCUCUGAUCUCCUACUCCUCUCAGCCUUCUGCUG  
>P1513  
UGUACUGGAGACGGAUGGGCAUUUCCGAGAGAAGCUGCAGG  
>P1514  
GACAGGGGCCCUUUUGCUUCAGGGGUGAGUUUGAGGUCUGA  
>P1515  
AUCAUCUCCAGCACCACGCCAGCCGCCCGCCGUGCCGCCAG  
>P1516  
GCGCCGGGGCCUUGGGCUGCAGGAGGUUGC GGCGGCCGCGG  
>P1517  
UCGGGUUCAUGACGCUCUCGAUAUCCUGUGCAGAAACCUG  
>P1518  
GGUGUUCGGUCUUGAAUGGAAAUGUAGUCUAGGCCAGUCU  
>P1519  
GGCCUCGAGGCUGGAGAGGCAGGGAGCGGAGCUCAAGGCUG  
>P1520  
CUCGCACGGUCCGCCAGAAGAUGCGGCUGGGGGCCCGGAAG  
>P1521  
UGGAGGAGAAGAGGAAAGAGAAAGCCAAGAUCACUACCGG  
>P1522  
CCUAUCCUUUCAGGCUAUUGAGGGCACCUACAUUGACAAGA  
>P1523  
UCCCCUGGGCCCCGUGCCUCAGUAGCAACAGAAGCAGCAGA  
>P1524  
CGGGGACCCCCCGCCAGCGAGACACACAAGCUGGUGGUCG

>P1525  
CAUCAGCCC GGGUGGAGUCC ACCUGGGGCGGCGUUCCAGGG  
>P1526  
UGCUCACUUUCCCCAGAGU ACACAGCCUGCCUUUCCACUC  
>P1527  
GGCUACAGAACAGCUCCACC AGGCGGGCGAAAGAGUCGGAG  
>P1528  
GGCGGCAGCCGAGGCCGCGA ACUGCAUCAUGGAGGUGAGCG  
>P1529  
CAGGGGGGCUCUCGAGCCAC AAGCGGCCCGGGGCCUCCACC  
>P1530  
UCCCGGAUCGGCCUCAGAUU AGCAGGCCCCGGGAGUGGGGC  
>P1531  
CUCUGGGAUGAUGAUGAUGC ACCUCGGCCAUCCAAUUCGA  
>P1532  
GUGACCACACCGGUCCUGUC AGGCUUCACUCGGAUCUGCCC  
>P1533  
AAGUGAUUGGAAUAUUAGC AGUGGGGGUUCUGUAGGGUCA  
>P1534  
AGACUCAUAGAAAGGGAGG AUGGAGAGUCAGGAGAGGUUG  
>P1535  
CUAAAGAAUCUUGGUACGUG AGGAAGAAACCCAGAAGAGGA  
>P1536  
GAUGAUGGAGGCCGAGAGGC AGAAGAGGGCCGCAUAGCAGG  
>P1537  
ACCUGCACUUACUCGCAGCC AUCUUUGUCUCCGCGGGCGGCG  
>P1538  
UCAACAAGGCCACGCCCUAC AACUACCCAGGUGAGUGGGGG  
>P1539  
GAGAGCGAGCUGGAGACGGA AGUGGAGUUUGUGUCAGGUGG  
>P1540  
GGGCAGCGGGCGGGCGUAGA AGGCGUCCUCGCGCACGGCCU  
>P1541  
UCUUGGCAUUCUCCUCUUC ACGCGGCCCGGGCGGCCACCC  
>P1542  
CGGAGGAGGACAAGGACCGC ACGGAAAAGCUGCUCAAGGAG  
>P1543  
AGAGGAUGAUGCCAAGAAAA AGAAGGUGCUGUCCAACAUGG  
>P1544  
AGUGGAGUCAGCACCAAGCC AGGCUCCCCGCGCCUGCCUUG  
>P1545  
UCAACAAGAAUGCUCGCGCC ACGCUCAGCAGCAUCAGACAC  
>P1546  
ACGUUGACGCAGAUCUCGCC AUUGGCGCCACGUUCGGGUG  
>P1547  
GGCUCAGCCAAUUCCACCC AGUUUCCAGGAGUCUCAUUUG  
>P1548  
CCCUCAUCUCCCGCACUGAC AGGUGGCUGGGGGCCAUGGCA

>P1549  
AUGUCCUGGUCUGCAGCCUACUGGUCGGCCUCCACCUUCA  
>P1550  
UCGGAGCAAGUCCGUGGAAGAAGCCAAAGACUGGGACGGAU  
>P1551  
GUAGCCGAAGCCAGCGGCGGAAGUAGCCGAAGCGGCUGGAG  
>P1552  
GGAGAAGAGCAGUGGCUGGAUCUGACCCGCAGCUUCAAG  
>P1553  
AUGGCCAGUCACGAGAACCCAGGUGAGCAGCCAGAGGCCUU  
>P1554  
AAGGGAGGCGCAGGUGGAGGAGGACGAUGGGAGGGAAGGAG  
>P1555  
CCCCUGGAAACCGGACCCGACCCGCGGUCCCCAGCCCAGA  
>P1556  
GAAGUUGCCCCAGAUCCAGAAGAUCAUGAUGGAGUUUGAGC  
>P1557  
ACUCACCGGAGCUGGGACGGACACCCGUUCCGCUUCCGGG  
>P1558  
GUGGUCGAAUGAUCAGGUCUACUCCUGGCCGCUUCUUC  
>P1559  
GGCGAUGGGGAAGGGCCGAGCCCCGCCAGCCAGCUAAA  
>P1560  
CUGGGUGUUUCCUGGUCUGCAGUCCGCAGCUCCUGCCAUC  
>P1561  
UUCGCCUGACGGGGUUUCGGAACUCUCACAUCGGGGGA  
>P1562  
CCGGGCCGUGCCCGGGACAAGCGCGCCGAGGCCGGGAGGA  
>P1563  
CUGGCUGUUGUGUGGUUUUUGCUCUCUUUGUCUGCCUGU  
>P1564  
CUGGUGGGAAAGGACCCGGGACUUGAACAGUGUUGUGCGGC  
>P1565  
CGCACCUACCGAGCACCAGGAGAGCCAUGCCGAGCGCCGGG  
>P1566  
AGCGCCGCCUCCAUAGCGCCACGGGCGCGGGCACCUGGGCG  
>P1567  
CCGGGCGGGCCCCUGGGAGCAGCCCCAGGCGGGGGACCGC  
>P1568  
CAGUCGGGAGGGAGGGAGCGAGCAGGCGAAGCCGCGGAGGA  
>P1569  
GCUCACCUCGGGCUGCGCGCAGGUGGCGAGAGGGUCGCUAG  
>P1570  
GGAGGAGGAACGAGGGGAGAAGGCGGAGAGCAGGAACGCGA  
>P1571  
GCUCUGAAGGGCUCCAGCCAACGGAGCCCGCGGCCAAACG  
>P1572  
GGGUCGGGCAGCAGCAGGACCCCCAGAGGCGGGGCCUG

>P1573  
GCCGAGCGAGCUCCGGAGGAUUUCAGUAUCUGCUACGGUA  
>P1574  
GAAGAAACAACUUGAAUAGAAAACGCUUAGAGAAGCAAC  
>P1575  
AAGCCCCACCCACAGGCUGACAGAGGCACCGUUCACCAGA  
>P1576  
GGAAAGGUGGGAGAAAAGGGAGUCAGACCGGGGGGCACC  
>P1577  
GCAGCUCCGGCGCCGCGGCGAGACGGAGACGGACCGAGCCA  
>P1578  
AGUGAUAGAGAACGACAAGCAGAAGAGCGACACGCCCAGC  
>P1579  
GGAGCUCAGAGGCGGGGGCGAGUACGGAGAAGCGGGAAGGA  
>P1580  
AUAUGGGUGUAAAGUUGAUAAGGUCAUGAAGGUUCAACAGA  
>P1581  
CAGUGGGGAGGGAAAUGACCAGAAGAAAAGCUGCAGCUU  
>P1582  
GGCCUGAGAGGAAGGGCAGACAGGCGGGCCGAGAUAGGAG  
>P1583  
GCUUCCUCGUUUCAGGGCCACCACCGCUGUUGUACCACUG  
>P1584  
AGACAAGGAGGUACCACACUAUUCACUGCUGCGUCGCAGAG  
>P1585  
GUAACGCGACAUGAUGACAGACCCGCGUGCUCGGCUCUUA  
>P1586  
UGGAGCCAAGUGAAGACCACAGCGAGGAGGAGUGAAGAG  
>P1587  
GCCGAAUCGGCAACGGCGCUAGGGUGGAGAGAAGGCGGCAU  
>P1588  
GAGACGUUCAGACGCCGAGCACCGGGCUCUCCUGGCGGGUG  
>P1589  
CUACAGGGGCCAGUGGCUGGAGAUGUUUGUCAUGGCACUG  
>P1590  
UGAUGAGCCUCAGAGCCAGAGAGGAAGAAGAGAUGGAGG  
>P1591  
GGAGGCCGACAGAGGACCAGUAACACCGGCCCGCCGGGACC  
>P1592  
CCAGCUCAACCGGGAGGUGGACGACCUGGAGCAGUGGAUCG  
>P1593  
GGACGAGCUCUAAAGAGUCCAGCCCCAUCCCCUCCCGACC  
>P1594  
CAGAGAUGGUGGAGCUAGAAAAAAGCCCUU  
>P1595  
GGAGGAGCUGGAGGUGCUGGAGAGGAAGCCCGCCGGGC  
>P1596  
GCCCCAAAGGGCAACGGGAGAUCCUAGGCCAGACCGC

>P1597  
UUUCCUUCUGCCACGGCGGGAUCGGGCACUCACCCAGUUGC  
>P1598  
CGGGCCCGGGCAGCGAGGGGAGUGCGCAGGGGAGGGCAGCC  
>P1599  
CCCCCCCCAAGGCUCGCCUAAACUUUCCCCCUUCUCUUGU  
>P1600  
CCGCGCGCCGCGUCCCACGUACCCCGCCGCGCCGGGCAAGA  
>P1601  
GAGCGGAAGGCCGGCUGCUCACAGCCUGUCAGCGCAGCAG  
>P1602  
GCGCAGGAGCAGGUGCGAGAAAGGCGAGGAGAGGCGCAGAG  
>P1603  
GCCACGGGUAAUCGAAAGAAAGGAAUGAGAUAGGCUGUUC  
>P1604  
AGAGCCGUCGAGCCGCACAACCUACAGCCACCGCCGCCCG  
>P1605  
UUUCCCAAUCAGGGAGCCGCACUGGGUGGCCGGCACCACCA  
>P1606  
UCAAGAUCUCCACUUAGGGAAGUGGGAAUCUUUUUGCGGA  
>P1607  
ACGCGCUGCGGGGCGCCCCAGUCUAUGGAGCGGGGUAAGA  
>P1608  
AAAAGAAGCUGGAACACAGAAAGAGAGGAGGUUGUGUCUCUU  
>P1609  
AGACCCGCGCGGGCCCGCCACGCCACGCAGAAGGAGAAC  
>P1610  
ACUCAGCACUUGAAAGUACAAAUAAUCAUGGAUACGGAAGC  
>P1611  
GAGGGGACUGAUAGCUCCCAAGGCAUCCCCAGCUUGUGAG  
>P1612  
UCCAGACUCGGCUGGAGGAGACCCAGGCACUGCUGCGAAAG  
>P1613  
GGGGCGGGCGGCUGGCGGUAGAGGAGGCUGUGGUCCUCAG  
>P1614  
ACAAGAUGGACCCGCUACGGAACGAGGUGCAAGGGCGGCAG  
>P1615  
GCGCUGGGCGCUGGGGGGGCAGUGCUGUUGUUGUUGGGG  
>P1616  
GCCAGAGAAUAGUCCCAAGUAAACUUUGCAGAGGACGGCCA  
>P1617  
GGCGGUUGGGGUGCUAUGGAGGAGGUGCCUUUCAGGAAA  
>P1618  
AAGCCAGUGAAGGUGGAGGAAAUGAUCGUGUGCGGAACCUG  
>P1619  
CUACUCUACUUUCUCAGACAAAUCCUGUCCCUUGUGCCG  
>P1620  
GAACCACGGCUUCGUGCACCAUAUCCGACGGAACCAGAUCG

>P1621  
AUCCUCCAGGUCCGUUUUGAAUUCGACACCCCAAGAGACG  
>P1622  
GGCGGCGGUCACACCCGAUAACUGACAGGCCCGCAGCAUCU  
>P1623  
GCGUGAGCACCAUGGUUUCACGCCUGCAGGAAGAGCUCCU  
>P1624  
AUGAGAGUUGUUGACAGGCAAAUAAGGGGUAAGUUAUCAUU  
>P1625  
AGCGAACGGGAGCAGCGGCGACUCGCCAGGGGGCUAGGGCG  
>P1626  
CACCGCUUGUCUGGAAUGUCAAUUUGAAACUAAAAAGCAG  
>P1627  
AAGAAUCGAAAGGAGAAAAAAGCCGAGAUGUAGUCUCUAA  
>P1628  
UCCUGGGCAGGGGCAUCGGGACACACGCUCUGAAGGAGAG  
>P1629  
UGCGAAGCCCGGGCCGAAGAGGCGCAGGAGGAAGGUGGCG  
>P1630  
CGCGCUGGGAUGCGAGCAGCAGGGCCGUCGCGCAGGGCC  
>P1631  
CUCCUCCUGGUCCUGGCGAGGGCACUGGCGGCGGGGG  
>P1632  
UGUUCUCUCCUUCGCUGUUCACGUUCCUGCUGCCUUCUAGC  
>P1633  
AGCGCGGCCACCGCCCCGGGACCCGCGCCGUCGCCUCCGG  
>P1634  
AUGGGGGAAGUGGGCUCAGGAGGUCUGGAUCUGUGAUGAGA  
>P1635  
CCACUCGGGGGAGAAGCCGCACCAGUGC GCCUGUGAUGGC  
>P1636  
ACGGACACUUACUGAAGGACAUUUUCCGGGGUGUCCAUGGC  
>P1637  
AAGUUUCAAAUUGACAUUCCAGACAAGCGGUGCCUGAGCCC  
>P1638  
UGGAUCUGCGGAUGAGGAGGAGGAUCCUGCGGAGGAGGAUU  
>P1639  
CUCCGCCAUUCUGGGACCAGCCCCGUACCCCUACCGC  
>P1640  
CAUCCUGGCCGACUUGCAAGAACUCCAGGGAGACAGCGGAG  
>P1641  
CUCCCCUGCCGCCACCCCGAGAUCAGAGUCAACCACGAGC  
>P1642  
CAGACAAGAAGAAUCCAGGAGCGGCACUAUGAGGAUGAA  
>P1643  
AGGAAGAACACAAAAGCAA AAAUUGGACAGUGAUGAAGAU  
>P1644  
GACCUGGAAGCCCCGGCGGAAAGGCCGUACCCGGCAGGCU



>P1645  
UCGGGGUGGGGAGACCAAACAGAGAGACAUUUCUGGCUCU  
>P1646  
CGGACCCACGUGGAAGCGGCACUCAAGAUGGUAGGAGAAUG  
>P1647  
GGGCCGAUGCCUUAACCUUCCAGCGCGCGCCGCAGCCGCUCC  
>P1648  
UGUUCUCCACGCUGGUUCGCAGGUGAGUGUCCCUGUUUAGU  
>P1649  
GGGUGUCCCAAACCAGGGCCACGGAAGGGCAGCGGAAGGA  
>P1650  
GCACGGCCGGGCCACCAGGA AACACGGCCACGGGAUCCCA  
>P1651  
CCGGCUCGCGUGCCGCCGCGAGGUCCAUAUUUGCUUAGUGC  
>P1652  
UUUGUAGGAUUAUGCUAAAAGAGAGUAUUGGAAUAUCUCAA  
>P1653  
UUGCUGAGUGUCAGCUAGACAGCAGCGACUAGGGCUCGGGC  
>P1654  
CUACCCUCCCCGAGGAAAAGAGGCCGGGGCCGCGCUGGGGC  
>P1655  
CGGCACCAUGGGCAAGGGGUAGAGGGGCAAGUUGGCCACCG  
>P1656  
UUCUGCCUGGGAGGAGGAGGAGGAGGAGGAGGAAGAGGAGGAGG  
>P1657  
GCCUCUGUGGUGACGCGAAGACAGAGGCAACAGCAGCAGCG  
>P1658  
UACUCCUUGCUUCUGCUGCGAUCUCUGUCAUGGGUUCUUGA  
>P1659  
GUUGCUGGUGGGCGGGAGGGAGACAGCAGCUCUCCUGAGC  
>P1660  
UGGCCGCUACCUGCAGCAAGAUAGGGCCGCCAUCGCCGGGC  
>P1661  
GCCGGAGCAGAAGUCCUGGUAGUUACAAGCAAAGGGAGACA  
>P1662  
CCUCAGCGUCCUCCACCGCAAACCCGGAGGCUCUCGGCAGU  
>P1663  
CCACCAUACCUCUCCAUAACUACCUCUGCUGCCACCACC  
>P1664  
AACUGGAGUGGCAAGUGGCGAGUCGCAGGAGGAAGGCCUGG  
>P1665  
CACCUUCCUCCCCCUCGAUGGGAGCGGGGGCGUCCCGG  
>P1666  
UGGCAGACCCAGACCGAGCAGAGGCGACCCAGCGCGCUCG  
>P1667  
UACCAAACCCCGGCUGCACC AAUCGUGUAUUCACCAAAGC  
>P1668  
GCCGCUGUCGCCGACUUCGGACGGCAUCCCGAGACUACCCU

>P1669  
CUAGUGAAUAUGAAAAGGAA AACUGAAUGAACGGCUUGCA  
>P1670  
CUCCUAGGCCGCGGCGGGCA AGCACAAAUGCGCUCGCCGU  
>P1671  
CUGUGGAAGGGAUGGGGCAC ACGGUGCAGGCUUUAGCUGGG  
>P1672  
GAUGUGGAAGACACUACAGG AAGUGGAGCUACAGAUAGUAA  
>P1673  
CCCACGUAACACACCGCGUC AACUACACCUCGCCGCGUC  
>P1674  
GGAUGCCCAGCUCGCCGUG AGGGUCCUGGAAGAGGCGUUG  
>P1675  
UAUCGAGGUGGUAGAACUUG AUCCCGGUCCGCCGACCCAG  
>P1676  
UGGUGGGGCGCUGGGGUUGG ACAUGGCUGCUCACGGGCUGA  
>P1677  
UCAGCCUCUCACCGCCGUG ACUCUCUGGCCUCGUCUCG  
>P1678  
UGGGCCUGGGUCUGGGUCUG AGCCUAGGCAUGAGUGAGGCC  
>P1679  
GGCAAUACUUCAGACUCAC AAGAUCAGAGUCCCCACAG  
>P1680  
CGUCGCGAGCAGCAGCCGUC AGUCACUCCAGGUCUGGGGG  
>P1681  
CGCCGCCUGCCCCGCCUC ACUAGCUUUGCAGGUCCCCCG  
>P1682  
UGCCCAUCACGUAGCAGCGG AACUUGGCGUCUUGCCCUCG  
>P1683  
UCCCGUCCUUCUCCAGUAC AGUGUGGGCUCGGGGAGGCC  
>P1684  
CCCUGGGCAGACCCUGGCAG AAGGGGCACGGGCAGGGUGU  
>P1685  
GCCCCAGGAGUCACCACAG AAAAUGUCAGAGGAGGUCAGG  
>P1686  
UGAGGAUGAAGAUGAAAUUG AACAGCAGCGAUGAAAGCAG  
>P1687  
GAUGAGUCCAGAAGAAGCCA AGCGACGGCGAUGGCGGCCGC  
>P1688  
GAGCCUCGCAGACGGUGCCC AGGAGCCGAGGAUGGAGCCGC  
>P1689  
UCGCUAGCUCCUACCUGUCC ACGCCACCUCUGGUCCUCUU  
>P1690  
CUCUCCUGGGCGUCAUCCC AGGUAAUGAGGCUCCCCAAGC  
>P1691  
UCAGGUGGGUCCUGGAGGAG AGCUUGAGGCCUGGGGCGCCC  
>P1692  
AGUACGCAGCGCGGACCC ACGCCACGGCCAGGAGCCAG

>P1693  
CUGUCCGCGGAGACGGAGCCACUCGCCGCUAAGUGAACGCU  
>P1694  
GCACAGGGCAUAGUUUAGAGAAAGAAUUCACCAACCAGGAA  
>P1695  
CAGAGGCAACAGGGAGCGGGACAGAGACUCCGAGCGCAAGA  
>P1696  
UGUCAGAGCAGGAAGGACAGAGACCUCGGCUGCCAGCUGC  
>P1697  
GGAGGACAAUGAUGAGGAUGCAAUGAUGAGGAUGACGAUG  
>P1698  
UUCGCAAGGUGCGCGACAGCACUGGAGCACGUGUCAUCUUC  
>P1699  
CCGAGAACAGGCGCCGACCGACCGCGCCGCGGACCCGCCCA  
>P1700  
GCUGGGCACCUGGCUGUCGGACCCACCUGGAGCCGGGACCU  
>P1701  
ACUCCAUCCAGGAGAUCUCCAGUCCUGACCCAAAAAUGGCA  
>P1702  
GCGGCCCGCGGGCGGGAGGAGGAAAGCGGCGGCGGUGGAG  
>P1703  
CCCCUCAGACUCCUCACCGAAGCUGCCGUCACUCCCGCAGU  
>P1704  
CUGCCCAGCGUUCUCCUGCACGCAGCCCCAUCGUCGCCGC  
>P1705  
UUCGGCGUCUGGAGGAAAGAAGGGGGCGGGGUAGUGCAGU  
>P1706  
AUUCCUCCCGGGACAGAAACAAGCCUUUAAGUUUAUGCUA  
>P1707  
CAUGGCGGCGGGACGCUGAGCGGGCGGGCGGCGGACGG  
>P1708  
CCCAGCCGGCCGACUCGAGAAGAAGCGGGCCCGGUCCUCC  
>P1709  
CGGAGACGUUGCCCACCUGCAGCUGCAGCACUCCCGCUCC  
>P1710  
AGGCUGGGCCCCUCUCACCUAGGAUGACAGCUUCCUCCUCG  
>P1711  
UCAUCUCCUCCUCUUCUUCUACUAUCAACAUCACCCUC  
>P1712  
UGCGGCCACAGCAUCCCUACAACAGCUGCAGAGAGAAGG  
>P1713  
GGGGAAGUAAGUCUGCGGCGAGCGGCGCUCCGGUCUCGGCC  
>P1714  
CCGGGGCAGGGCAGCCUGGAGGCAACCGCUACCCACCUCA  
>P1715  
UCUGAGGCUCCUGAAGCCGAACCAGCUAGACUUUCCUCCU  
>P1716  
GGACGCCGUGGAGCACGGCGACCGGCUGAGCGUCAUGGAGG

>P1717  
UGUGUUCUCCGGGCCUCUGCAGGUUGCAACUGUGGUGGAGC  
>P1718  
AGUCUCUCCACAAGUCCGAAGGCUCAUAGUACUUCAGCAU  
>P1719  
UUUUCUUGGACCUGUUCUUUACCGUCUCUGGAAGCAUCAAG  
>P1720  
GCCUCUGGGCUCUGGGCCACAUCUGUAUUUCUGCCCUGGAC  
>P1721  
GCAGCACCGAGAGGCCCAGCACACCUCUUCGAGCUCCUAGAC  
>P1722  
CUGUGACGCUGGCCCGGGUGACGCGCUGCACCACGGCCUUC  
>P1723  
UGCGGCUGAGCCAGCGGAAGACGCCGGGACUCCCAUAGCG  
>P1724  
GCCCGUCGCCUUGGAGCAUGAGCGCUGCGCCGCCGCGGGCU  
>P1725  
CUGGAGCAGGGGCACCCAGGAGCAGGCCUCGGAGCAGCAGG  
>P1726  
CCGGUCGGAGGCAGAACGGUAGCCCCUCGGCGGCCGGCCGG  
>P1727  
GAGCACCGCAACCGCCUCAGAGCCAGGCCUAGCGGCGCGA  
>P1728  
GGAGGGAGAAGAGGGUGAGGAGGAAGGGGAUGAUAAAGGAUG  
>P1729  
GGGCUGGGCUCGCCGGCGGCACCCAGAUUGCGCGGAGCGGG  
>P1730  
UCCAAGCGGCUCAGCAGGGCAUCGAUAUUGGACUUGAUCUG  
>P1731  
AGGUGGCAGGGCGAGAGGGAAGUAGUAGAAGGGGGCUAUG  
>P1732  
GUGACGAUGACCGUGAGCCC AUCCUGGCGGCAGGAGCACUC  
>P1733  
UAGGUGUUGGUGAGCUUGGCAAGCAGCCGAUCUCACAGUU  
>P1734  
CUCAUCCCGGGCCCGGCUCCAGUCCACUGUCAGUUUUUCCA  
>P1735  
GAGAAAGAGGAGACAGAGGAAGCACCGAGGGUGACUACGUU  
>P1736  
UCAGCACCCACCCACCCACAUGAUCACUGACAUGGGCAG  
>P1737  
CAAUGAGAUGGUCACAGGAAUGGACAGCUGAACCAAGGUC  
>P1738  
AGCCCGAAUAUCGGGUUCCAAGGACGGCUAGGCCCGAGAGA  
>P1739  
GUGGAUGCUUUGUCAUUUUCAGUCAUCAACGGGGCUGCCUU  
>P1740  
UGUGGGCUCCUCGCUGCCAGAGGCCUCACCGCCUGCCCCUG

>P1741  
CCCGAGAUGGGGAGCGAGGGAGGGGCUGCGGAGGAGCGCGA  
>P1742  
AAACUCCCCAAAUGACACCCAGGACCACAGCAAUGAUCUGU  
>P1743  
GAGUUACUGAUUUUAUUCUUGAGAUUCCUCUACUCUCGUUUAU  
>P1744  
GCGGUAGAAGAGGAGGCCUGAGGAGCUGGGCGGGCAGGGAG  
>P1745  
UGUUGACUUUUCUCUUCAGGAUCCCUGCUGCCUUGGUGAUC  
>P1746  
GGAUGAUGAAGAGGAGGAGCAGAAGAUGCGUCGAAACAAA  
>P1747  
CAGCGGGCAGCAGAACCCUACACGACCAACGUGCUCAGC  
>P1748  
CUUGCUCUCCACAUUCUGGAUGAUGGCGCUCUUGAUGAAG  
>P1749  
AAUGUAGGGCCUGCAUGGAGAGGGUUCUGCCCUGCCUGAG  
>P1750  
GAAUGCAACUGCAGAAGCAACAUGUGACCUUUUAGAGAUG  
>P1751  
GCAGGUACAUGGUGUCGGGCACAGCUGGGUACGCACCUGAA  
>P1752  
AUUCCCAGACUCUGUGGAGGAGCUCCGCGCCGCGCAAUG  
>P1753  
GGCGACUCCGCCUACGAAGACAGCAGCAGCGGAACAGAC  
>P1754  
CUAGUGUCCUGGGCGUCCGAGGCGAGGCCCGACCA  
>P1755  
CUAGCGCUGCUGGCAGGCGACAUGCAGAGUCCCAGGCUG  
>P1756  
AGGCAGAACAGUACUGGCGAGAGUAGCAGUUGAGGGGUGAG  
>P1757  
GCAGCGGCGGGCCUGAGGCGAGGAGCGGCCGGGAGCCCGC  
>P1758  
CCUCGCCUAUGGUUCCGAUUAGCCGAGGUCCGCAAGCAUG  
>P1759  
CGGGCCCGCUUGGCUCUGCGAUUCCUCUUCGCUAGCCGUUC  
>P1760  
GAAGCUCCGCAGGAUGGGGAGAAGAUGGCGGAAGAGGAGU  
>P1761  
GCUGUGGUGUACGAAAUGACAUUCAGCUAAUACUGGACUCG  
>P1762  
UGCUCGCGCCCCUGCACCCACCGCCCCGCGCCGCGCC  
>P1763  
AAGAGGAGGAGGAGGAGGACAGCGGUUCAGUAGCUAACUG  
>P1764  
UCUUCUUUUUCUUUCAGGCAUCAUGGACCGAUCUAAAGAA

>P1765  
GCGAUGGGUUGCGACGGGGGACAAUCCCCAAGAGGCAUGA  
>P1766  
AGGAGGGGACAUGAGGUGAGAGGUAUCCUGGCCGAGGGCGG  
>P1767  
GGACCCGAGCAGCAGCUGGACUGAACCGGGAGUCGGUGC  
>P1768  
GGGCUCCGGCCGGCGCCCGGAGCUGGGGCCCCGCAUGCAGG  
>P1769  
UGCUCUUCGCCAAGGCGUAGAGACCCUCCCCAAAUAACUA  
>P1770  
GUCAGCGUGGUGGUGGAAACAGCUGAAGUUUUAGGAGACAG  
>P1771  
UCCUGCAUGUUAUGGGUUUAUGGAGAGUAAGUGUCAAU  
>P1772  
UGACUAUGUGCCGAGCGAUCAGGUGUGCAAACCCCUCCCC  
>P1773  
CUCGGCCGCGCUCCCGUAGUAGUCCUCGUCCAUGAUGGCGC  
>P1774  
GCCAGUCCAGCUCUUGGGCAGAUCGCGUGGGGACAGGUAC  
>P1775  
CGUCUUGGCGAUUCGGCCCGACGAGCUCGCUUUCGUACA  
>P1776  
GGCCCGGGCCUGGAGCCAGGAGGGGCCGCACCGGCAGCACC  
>P1777  
CUUGCUCUUCAGCGACUGCGACCCCUGACGGGCGCCUGCC  
>P1778  
CGCCCAGCCCAUCAUCCUCAGGGACUGCCAGGUGAUCCCG  
>P1779  
GCUGGAGGCCUGUGUCGCCAGGACAACAGCCUGCCCCGGC  
>P1780  
AGUUGGGGCUUGGGGAAGGUGAGCGGCUUGUCCCCCAGCUGA  
>P1781  
CGCGGAGGACGAGGACUGCGAGGACGGCGAGGCCGCCGGCG  
>P1782  
CCAGGGUCUGACUGGACGAGAUGGACCCCUUGACCCAAGG  
>P1783  
CGCGGCAGGAGCAGGGCUGGACGGGCCUGAAGGAGACCAGG  
>P1784  
GUGACCCACCUGCCCGAGCCAGCCUUGCGGCCUCUGCCCCG  
>P1785  
ACGCCUGCUUGGACUCAGCCAGCCUCUCCUCGUCGGUGGAG  
>P1786  
CUCCUCGUCCAUGCUGAGAGAGGGAGGCGCUGGACCAGGGC  
>P1787  
GAAGGCAGACACCCACAAGAAGAUGACUGAGUUCUAGAGAC  
>P1788  
CCACCACCGCAGCCUCACCCACCUUGCUGCGCCCCGCCGAA

>P1789  
UGAUGGUGAGGAGGACUUCUACUACACAGAGCUGGAUGUUG  
>P1790  
CUUUGCAGGUGGAAGAGGAAUUGUCACUCUGCGCCAGGUC  
>P1791  
UGUCCACCGCCGUGGUGAUGAUUCUCACUCGCGGAAAUGCA  
>P1792  
UGUCAUCAAGCAGUACAACAAGUUUGUCAAGCCUCCUUCG  
>P1793  
CCUCAAUCCCAAUCCCAAUCACGGCACGCAUGACGGCCUGG  
>P1794  
CUGCCCUGAUGUUGUCUUGCACCCACUCCAGCUUCACAGAC  
>P1795  
AGGUGAGGAAGCGCUGUGAGAGUGGCAGAGCCUCGGCAUGGG  
>P1796  
GCAGGUGCAGCGUGAUAGGC AUGGCCUUCAGCUCCCGCAGC  
>P1797  
UGUGAAGACUUGGAAGAGGAACGGAGGGAAGAAGAAGAGAA  
>P1798  
CGGUGCCGCCGGCGGGUGAGGCCCCGCGCGUGUGUCCCG  
>P1799  
GCAGGCGCCUUCGCGGACCGAGCCUGACGGAGCCGGAGGCU  
>P1800  
GAUGAGGAUGGUGAUGAGGUAGAGGAAGAGGCUGAGGAACC  
>P1801  
GGCCGCGGGGAUGUCCGAAAGGCCCGGCGGGUGAACGUGC  
>P1802  
UUGCUAACAUCUGGGAGUCC AUGGAACUGGUUGCUAACAUC  
>P1803  
UCCACGAAGAGGAAAAACUGAAAAGGGAGGAGAGUGUCAA  
>P1804  
UCCUCCGCCUGCCGCACAGUAGGGACAACUCUCCAUUUAGA  
>P1805  
CCCUGGACACCUCACUCUGCACCCUGGACACCUCACUCAC  
>P1806  
ACAGUUACUCACCGGUCUUCAGUCUCGAGGCAGACGCCGGG  
>P1807  
CGUCCGCCGCCACCUCCACCACCGCCACCGCCACCGCCACG  
>P1808  
UCAGAUGGGGGUAGGGUGGAGGCACUGGCUGCGUGGCUUC  
>P1809  
AGCCCGAGCGAGCGGCGGAGACCGUGCCCCCGCCUCGGCCC  
>P1810  
GCCUGGCUGCCACUACCGUACAGAGGCCGUGUCGCGCUGG  
>P1811  
GCAGCUCCCGCCUGAGAUCAGCUGGCUCAGCGCCUGGCGG  
>P1812  
GGACCGCGCUCAAGAGGCUGAUGGCCGAGUACAAACGUGAG

>P1813  
AAAGAUGUUGGUGUUGAUGAACGCCAGUCCUAAUGUCCCC  
>P1814  
UGAGGGUCCGCGAGGCCGGGAGGUCCGGGGUCGGGAGGUC  
>P1815  
AGGACCGUCAGCGCCGCGGGAUGCUGCCUCCUCCGCCGCGG  
>P1816  
CAGGCCCAGGUUCCACGGGCACCUGCUUCCACCUCUGGG  
>P1817  
CUCUGGUCUGUCUCUACUGCAUUCUAGAAACAGGGCAAUC  
>P1818  
GCGUGGUUGCAGGCAGAAUUAGAGCAGUCACACCCACGGUU  
>P1819  
UGCCACCUCUCCACCAACAACGGAAGCCACCACAUCUUC  
>P1820  
AGCCGAAGUGGAAUGUGGGGACGUCUGCGACACCGGGGACA  
>P1821  
AUGAAAGAGGCGGCGGGCAGUUGCUUCCGACAGGGUCCC  
>P1822  
GCAUGGUCUUCUCCUUCUCCAUUGCUCUAGGGUAGGCCUGC  
>P1823  
GCGGAUCCAUGCCCUUCUGAAGGGAAAAGUGAAGAGGAGC  
>P1824  
GCGCUACGCGGGCGCCUUGGAGGAGGUGGCGGACGGUGCCC  
>P1825  
GGGCGCAGGGCUAGCGAGAUACUUCGCAGCACGGAGGCCGU  
>P1826  
GGUGGAGAGCGUCAACCUUCAGUGGCCACCUACUCCAAU  
>P1827  
CUCAGGCAAUGCAACGAAGAACCCCGCCGACCGCUCUCCC  
>P1828  
AUGGGUCAGAGCCUUCUGAGAGCGCACACGGUUAGAAGAG  
>P1829  
CGGACGAGGAUGAGGACUUCAGCAGCAGGACCGGGAACUG  
>P1830  
GAAGUGGUGUGCCACGUGCCACUUCUACCGCCCGCCGCGCU  
>P1831  
CACCAUCCUACGCGGGCCCCAAGCUGUCGCCUUCAUCCAC  
>P1832  
UCAGCCCGGCCCCAGGAGAGAGACCCGUGGAGCCCUAUGUC  
>P1833  
CCACAGCCCCAGCAGCCUCCAGUUGCUCAGAACCAACCAUC  
>P1834  
GUCGAUGCCCCUCCCCCCCAGCCGUCCCCGCAGCCCGGCC  
>P1835  
GGAUGGCUGGACCGGGCAGCACGGGGGGGCAGAUCGGGGCU  
>P1836  
CAGCGCCCGGCUCGCGCCGCACGCGCCCGCCCCGUCCGCCU



>P1837  
GGCGGCGCAGUCCCUGCGGGAGGGGCGACAAGAGCUGAGCG  
>P1838  
UGCAGGGCCAAGCCACAGGAAGGGCUGAGCUGGAGGUGGGC  
>P1839  
AGUCUUGCAGGAGCGUGUCCAGGAAGCCUGGGGUCUCCUCA  
>P1840  
GGACCCGGUGGGCUUCGCGGAGGCGUGGAAGGCGCAGUUC  
>P1841  
UUCUUGGCAAAGAUGUAAACAGCGCGGCAGGGCUGGGACAG  
>P1842  
GCUGGCCAUCGAGGGUGCCCAGGCCUUCUACAACGGCAGCC  
>P1843  
UGAGCUGUUUCUCCCCAGGACGGGGCUCCAAGUGGUCCCC  
>P1844  
AAACUCACCUCUGAACAGAACAUGGCAAACACACGGCU  
>P1845  
GCGAGAGGUGGAGGCCGCGGACAUUUUGGUGCCAAGCCGAA  
>P1846  
AAAAACGGAAGCCCAAAGUGAUCCGAAGCGAUGGAGCCCA  
>P1847  
CCAUGGGAGGUGGGGAUGCACAGGGGGCAUUGGGGCUGGA  
>P1848  
GAUUGGCCCCAGCAAGCCCAUGAAAUCCUCAACAGCCAC  
>P1849  
GGCAUCCGCCAGCACGUAGGAGCUGGCCACGCCAUAGCUCA  
>P1850  
UGGUGCCCGCGGGCGCAGAAAGGCUCAGGGCGCAGGUCCGC  
>P1851  
CAGCCCUGGAAGAGCAGAGGAUGGAGGGGAAGGUAGGGGGA  
>P1852  
GGAGAUGUCAGCGCAGGAGGAGACCGCAGGAAGGAGCUGG  
>P1853  
UGCCCACCUCACGGCUGUGACACGGCCCGUGUACCACUCC  
>P1854  
ACAUCUAGGCUGCUCAGCCACCUGAGGCACCCCGAAAGCC  
>P1855  
GAGGCCACAGGGUACUCGCCACGAUGAGCAGCACCUUAGCU  
>P1856  
GGGAGGGGAGCGGCGGCCGAGGCAAAGGGCCGCGAGCGG  
>P1857  
GGUAUGCCUGGGCUGAAGACAAGGAGCACUGCGAGGAGUAC  
>P1858  
CCAGCAACAUUGUCAAUAGGCAGGCAGCGGCAGGAGGGGCGA  
>P1859  
GAUGGACAGACAGACACCACAGCCUCCCUUCCAGACCCC  
>P1860  
CGACAAGCUGGAGAAGACCAAGACGCGGCUGCAGCAGGAGC

>P1861  
CGAUAAGUAUCUCUAUGUGGAUAAAAACUUCAUCAACAAUC  
>P1862  
GGGGUCUGCAGGGCUCUGGAAGUGAGGGGUGGCCACUGACC  
>P1863  
GUCGGAGGCGGGGAGGCCGGAGCUGCGGGCGUAGGGACCUG  
>P1864  
AACCAGUGAUGUGGAGCUGGAGUUUGUCCUCCACCGAGAC  
>P1865  
CAGCCCCUCAGCACAGCCCUACCAGAGGGUUCAAGGAAGG  
>P1866  
UCUUGAUGAAGGCGGGGUCGAGCUGAGCGCGGAACUCGGCG  
>P1867  
GGGCCACAGGGAGGGAGGGGAGAUGGAGGCCCGUGGAGCG  
>P1868  
AGGACGCGCUGUGGGAGCGAAUCGAGGGCGUCCGGCAUCGG  
>P1869  
GCGAGCCCCGGGGCGCGGGACGAGGGCGGACUCGUCGUCU  
>P1870  
GCCGCAUGACCGAGACCGGGAUGGUUCCUCCCCUCUGAGC  
>P1871  
UCCCCGGCUCGGGUGUCGGGAGAGCUCGCCGAGCCGGCUUU  
>P1872  
AGAAGCUGGCUGCCACGCCCAAGAAAGCCAAAAACCCAAG  
>P1873  
CGCGGCCGCCGCGCACAGUCAGCUCUGGCCAGCUCGUGG  
>P1874  
GCCGCGCGGAGCCGUUGCCAUGGCAGCCGCCCGGGGAC  
>P1875  
CCCUUGUCCAAGGGCCCAGCAGCCCCUCGUGUAUCCUGGA  
>P1876  
CCGAGUUUCCGAGCCUCAGAAUCCAGGAGAUACGCACAGC  
>P1877  
CCACUGCCAACCGGCUCCGCAGUGCCGCCGAGCCCGUGGCU  
>P1878  
GCCGGGGCGGAUGCCGGAGGAUUCGCGGAGCCGCCCGGCGC  
>P1879  
UGGUUCAAAAGAAAUGGAAGAAAAGGAGCGAUGUGACCGAU  
>P1880  
CUCGCGCCAGCUGGGGGCGGAUGGGCUCACGGUCUCGGGGA  
>P1881  
GAUAUGCUUGUCCUGUCCCACUCUUUCUGAAGCGCUGUG  
>P1882  
CAAGGACGGCAAGCUGAUCAAGAACAAUGCCUCCACUGACU  
>P1883  
GGUGCGUACGGAGCGGGCAAAGCCGGGGCGCCUUCGACCC  
>P1884  
CCGGGGAGAGGUACCCGGCCAGAGGCGAGUCCUGCGGAGUG

>P1885  
GGCCAUCAGGGCCAGGCGGAGAUCAGCAGAGCGCCUCAG  
>P1886  
CGCAGGGCGGCCUCUCCCCACCCUCAGCCCGGGCCCGG  
>P1887  
AGCCAACAUGUCAGGGUGGGAGUCAUAUUACAAAACCGAGG  
>P1888  
AGGGAAAGUUACCAAGAGAAACACGGUGAGAAGCUGAAUG  
>P1889  
CGAUGCCCACCUCACCAAGAAGCUACUGGACCUCGUUCAGC  
>P1890  
ACAGUGGGAGAAACAAGAUCAGAUGAAAGGUGAUGCGGAUG  
>P1891  
CCCGCCCUGGGCUCCCCAAAACCGCAGAGCCCCUCCCACC  
>P1892  
GGCUAGUAUUGGCACCCGUCAGGUCCGGGGCUCUCCGGAGC  
>P1893  
CCUCGUUCAUGUCCCGACUGAAAUGGGCUUCACGAAGGUG  
>P1894  
GCCUGUGCUCCCCCGGACUGAGGCAGCCAGCUUGCGGGUGC  
>P1895  
UCGGCGGAGCAAGAUGGCGGACAUCUCCUGGACGAACUCA  
>P1896  
AAUCUUGUCCCUUCUCCCCAUCCCUUAGCACCGGCCUCU  
>P1897  
GGCCGUGUUCGUGUUGGCAAAGAAGGUCGGCUGCUGAGCCA  
>P1898  
AGGCCGGCGUACCAGCGGAGACCCUCGCCGUGGACAAAGCG  
>P1899  
CGCCACCCCGCGGCCCGCAGGAUGAAGAAGGACGAGUCG  
>P1900  
GCAGAGGUGCCAUGAGCCUACAACUGUGGUUGCAGAUGGA  
>P1901  
UGGACCACCUCCCGGUGAAGAUCCUGCAGCCAGGUACGCGC  
>P1902  
CGAGGUGAGGUGAGGGGUGGAGCGGGGAAGCACGGGUGGG  
>P1903  
GCCGACCGACGAGGUGGACGAGGGCAAGUCCAAGAGAGGCA  
>P1904  
AGGGCCGGGGCCGGCCAUGAGCGCGCCGUCCUCGAGUCCC  
>P1905  
CCGGGCACUUAGACUGCUGCAGCCGUCUUUGGCCAGGCAG  
>P1906  
CUAGAGGGAGUGGAGCGGUGAGCACGUCAGGGGUGGGGGGC  
>P1907  
CUUCGGGGGUCUCUCCGCAGUGUUCUCUGAGUCUGAGCU  
>P1908  
CCAGCAUGAUGGCGGCCGGGAGCGAGAACGGACGGGAGGAC

>P1909  
GCUCCGCCUUUCUGCCCCCACCACCCACCCUACGGGUACGG  
>P1910  
CCGAGCGCCGGCCAUGGCCAGCCCCGCGUCCCCUCAGUGU  
>P1911  
GGGGCACAGCCCGGGGCGGGAGGCGGAGCUUGGCGGCCGAG  
>P1912  
UGGUUUGGGUGGGCAUUUGAUGCGGGAGGUGGGUGGUGUG  
>P1913  
CACGGGCAAAGGGGCUUGAGAGGCCCGGAGGCGAAGCCGA  
>P1914  
GCUGGUGAUUAUCUCAUGUACUCCCGGUUAGCCCAGUCCU  
>P1915  
GAUCCGCGACUGAGCCUGUGAGGUCUGGGGGACUGGACGGC  
>P1916  
GGUGUCCUCGAGGCCGACCCAGCGCCCCAGGCGGCGGCUG  
>P1917  
GAAGCCCAAGAUCGUCAAAAAGAGAACCAAGAAGUUCAUCC  
>P1918  
GCUCGAGGCGUGAGGGCUGCAGGCACAGCAAGAUCCCGGGG  
>P1919  
GCUUCCGCGUCUUGUCCGUCAGCCUGUGCAUUGUGAUUGAG  
>P1920  
CAGCCAGUCUCCUUUAUGUGAGGGUUGGUUCAUCCUUUG  
>P1921  
CCGUUGCCGCAUGCCCAUGAGGGCCGCUUCCCAUCCGC  
>P1922  
AGGACUCGGGAGCGCCGCGGAGGAGCGGCAAAGUUUACUU  
>P1923  
CCGGCUGCGUGAGUGCUUAGAGCUUUUCGGUGGAAGAUGCC  
>P1924  
UCUCUCCAGCGAGAGAGAGACACGAGUGGCCAGGCCAGC  
>P1925  
AGGGCCUGUGAGCUGGAGGCACUCGCCAUGGCCAAGUCGGG  
>P1926  
CUUGCUCUACGUGGUCAGGAAGAGCAGGGAGACCAAGCAG  
>P1927  
CGCUGUUCUCCGGGAGCCCACACCGUUCGCGCGGCCA  
>P1928  
AGUUAGGAGGAGAGUAGGUGAUGAUCAGACACCGGAGUU  
>P1929  
UCGUGCCAGACGUGGCCUCUUCGCCAACCUCUUAACCCC  
>P1930  
UAGGCCGGAGGGACUCGGAAAUUGAUGGUCCGGCAGGUGGU  
>P1931  
CCCGUUCUUGAAGCGGGCCAGAAACGCCGGCUCGGCUGGC  
>P1932  
CUCACCCUCGAUCCCGAAAACAUGCAGCCGGUGCCUCCA

>P1933  
GGAGCCAUCGCCGAAGCCCGAGGCCGGGUCGCCGGGUUGGGG  
>P1934  
CUAGGAAGACCUCCGUGUGGAUGGCCGUGGCUGUGAGGACU  
>P1935  
AUCUAGAAAGACUUCGGCGGAUGCACAUGCGAAGUCAAGGU  
>P1936  
UCUCCGUGUCUGAGUUGCCUAGUCGCGGCUACGGCGUCAUG  
>P1937  
GCAUGC GG GGCACGGCCUCC AUGGCCGUCGGCACCCGCCGG  
>P1938  
GCCGCCGCCGCCGCCGCAGCUUGGGAGGUGCUGCCACC  
>P1939  
GUCAAGAAAGUACAAGAAGCAGCACGAGCCUCUGGGAAAGU  
>P1940  
CGGGCUGCGACGAUGGCCGCAGCGGGCGGGCGGGCGGGCC  
>P1941  
GGACCUCCGCGCCAGGCAGCAGAGGGCGGAGCGAGCCCCCG  
>P1942  
AGCAGGUGAAGCAGAUGAUGAUAGUGACGACAGACAGCACA  
>P1943  
CGCGGCGGGGACCGGCCAGUCAUGGCUGGGCGGGCGGA  
>P1944  
CGAGGCGAGCGUGGGGAGCCAGGCAUCCGGGUACGUAUGUC  
>P1945  
GCCCCCAGGGAGAGAAGGAUCCAGGACCCUGGGGCCA  
>P1946  
GCCAGGGCCGCGAGGCGAGAGGUGAGGUGGGUUGGCCUG  
>P1947  
UCUCCAUCUUUCCACUGGCACCAUCUCGACCUGGGGCUC  
>P1948  
GGCAUCAAGGAGACCGGGAGAGCCUGGACCGAGGGGUCA  
>P1949  
AAAGCCAGGCGAGGAUGGCAACCUGGCCUGAAUGGAAAA  
>P1950  
GGCUGGAUGGCCGGAGCGGACUGGAUGGGAAACCAGGAGC  
>P1951  
UCGGGGGCCUGUGGGUGAAAAGGGAGACCAGGGAGAUCUG  
>P1952  
UGGACUGGAGCCAGAUACUGAGUAUACGGUGCAUGUGAGGG  
>P1953  
CAAUGGAUGAGGAGCCAUCCAGUAAGAACACAAUGUCAGCG  
>P1954  
UGCCUGGAGAAGGAGGUGGAGAGCAUGGGGGCCCAUCUUA  
>P1955  
GAACGCGUACAGCGCGCGGUACAUGAGGCCGGGCAGGGCAG  
>P1956  
AGAGAAACAAUAGGACGGAAACGCCGAGGAACCCGGCUGAG

>P1957  
CUUCGGCCGCGCCGGCAUGAGCCACAUCCAGAUCCCGCCG  
>P1958  
CUCCCACGUAAUAGUCCUCU AUGUCCCCAGGGUCGUCUUCU  
>P1959  
GGCCACCACCUCUCCCCUC AAGGCAUGCUGAGCAUGGGCA  
>P1960  
UACAAGGUGUCAGAGUAUGC ACGGCGCUUUGGUGUUCGGU  
>P1961  
CUUCUAGCCGAGCUUUUGCC ACCUGAAAGAAGCCCCAGGUG  
>P1962  
UUGACACGGAACCCCAAAGC AAGGAGGAGGGCUCGGGCCCG  
>P1963  
CAAAGACCAAAGAUGGAGUG AGAGAGGUUUUUGAAAUGGCU  
>P1964  
GUCUGUCAGGCGGGUUGGUG AAGGGCGCGGGGCCGGGCACG  
>P1965  
CCAGCGCCGCGGACACCGGA ACUUCUCCGCGCGGGGCCAC  
>P1966  
UGACUAUGAGGAGGAAGAAG AGGAGGAACAGACCCCUCCC  
>P1967  
ACUUCACGUGCGCCACCGAC ACCAAGAACGUGCAGUUCGUG  
>P1968  
CACCUUCUCCAGGUGCCCGG AGCAGUGCCCAAGCUGACUCG  
>P1969  
AUGCUUGUGCUGACCUCAUC AAUGAUCAGUGGCCCCGCAGC  
>P1970  
GGCCGCGGAGGCGAAGGGCC ACAGGCCCCGAGCUUUGGACC  
>P1971  
GGUGCCUCGUUCUGUACCCG AGUCAAGCCUGGUCAGCUCCC  
>P1972  
UCCCAUGCAUACCUGCCUGA AAGGCUGCCCCACCCACCCAC  
>P1973  
CGUGGACUCGCGCAGACGGG AAGCAGGCGCGUGCUGGCGGU  
>P1974  
GAUACGCAGGUACUGGCGGA AGAGCGUCACCGAUGGGUGCU  
>P1975  
GCAGGGCAGGCACACUGGCA AAGGCAGGCAGCAGGCGUGUA  
>P1976  
CUUGAUACCAUUUCUGUGCC AUUUUCGGGCUGUGGGAGAAA  
>P1977  
CUUGGUCUUUUUCCCACCC AACACCUACAGCCCGAGGCCU  
>P1978  
AAGACCCUCGACCAAGCAGG AAGAAGAGGAGGAGGCGGCC  
>P1979  
GCGCUGGGCACCGCGGCCGG AGCUGUGGGCUGGUAAGUCUG  
>P1980  
CUGCCAGAUGGCUUUGAAAA AGGUGAUCCAAGCAGGCCCU

>P1981  
AGGCACGCCUCAUAGUUUGCAAUCUCAGCCUCCACACACUU  
>P1982  
UGCUGUCCGUGGCUUCCACGACCUCCUUCUCCACUGGGCUG  
>P1983  
CGGGGCGGCCCCUCAGCGCCAUGUCCAGGCCUCCCUCCCC  
>P1984  
UGGGGGCCCCAUUCAAAGUAGC<sup>GG</sup>UUCUCAGCCACGUCCU  
>P1985  
CAGCGGCGUACGGCGUGGGUAGAAGGUGAAGUCCACGCGGU  
>P1986  
GUCUCACCUGGGCCCUGGUGAACAUGCUCGACCGAGGUCGU  
>P1987  
AGCGCGGGUGGCAGGCUGCGAGGCGAGGGCGACCGAGACUU  
>P1988  
UGAAGCAACACGACCCCUAUAUCACCAGCAUCGCAGACCUC  
>P1989  
CUCCGAAGCGGGGAAGUGGGACAAGAUGGUUUACAUCUCGA  
>P1990  
GCGGGCCAGUCUCGCCGCCGAGCUGCUCUCAGCCCACCCAC  
>P1991  
CCUCACAGCGUAAAACCCGGAGGGUACAGUUAGCGUCUCGC  
>P1992  
GCAGGUCCCAGCCCGGGGCUAGAGACCGAGGGCCGGGUCC  
>P1993  
UCCAUACCCUGAUUUUAUAGCAUCACGAACUGUCACCUGUCA  
>P1994  
CGGGAAGCCCCGUGCCUCGACCGCCGCCACCGCUCCGACG  
>P1995  
AGGAGGCACCGCAUUUGUAAAAGGCAAGAGAGAAAGGAAGG  
>P1996  
CAGGCCGGAAGCUUCUGCGAGCCCUAGCGCUGCGGCCCCG  
>P1997  
AGAGGUCACAGGAAGUCAGAGAACAGUAAUACGCUAACAG  
>P1998  
ACCUAGGCACCCCAUCUUCAAACCCGACGUCGUGACGACG  
>P1999  
UGAGGCCACGGUGGGGACCGAAGGGGACGGCUGCCCAGCCC  
>P2000  
GCGGCAGGCACAGCGCGGAAGACGGGGUGCGCGAUCCUCG  
>P2001  
UGGAGCCGUGGAACCGUGUGAGAAUCCCUAAGGCGGGGAAC  
>P2002  
GAGCGUAACUGUACGAGGUGAGAAUCCGUGCAUUUGACCCA  
>P2003  
CCCUGCCCCGCCUGAGUCUCAGGAGAAGAAGCCGCUGAAGC  
>P2004  
GCUCCCUUCAGACCCCAGGCAGCGGCUCCUCGACUGUCCC

>P2005  
CCAGCCUUGAUUCUUCGGGAAUCACUUCUCCCUCGCCGCGC  
>P2006  
AGUUAAGUCAAAGCAGGAGAGUAAUUAUGAAUAGCGCAGC  
>P2007  
GCAGCGGGAAGGAGCCGGGCACAGCCAUCCUCAGCUCCGCU  
>P2008  
GGGAGCGGGCGCCGGAGUGGAGAAAGGAGCCAGCGGUGGGC  
>P2009  
UUUCUAGGGGCCUUGAGAGGAGGGGAAGGGGGAGGGGGGA  
>P2010  
GGCAUCUCGCCAUGGGGAGCACGGAGAGCAGCGAGGGCCGC  
>P2011  
CGCUCUGCUGCCUCCCUCUGACUGGCCGUCAGCUCCUCUAC  
>P2012  
UGGAUCCCAAGAAGAAGCCAAGCCUCAGGUCCGUGACUUUU  
>P2013  
CCUUAGCCAGGUGGCUGCUUAGGUCCACUGUGCGCUUCACG  
>P2014  
GGAAGAGGAGGAAGAGAUCAACAUCUAUGCAGUCACCGAGG  
>P2015  
GCCGUCGCGGGCCCGCUCCGACGCGGAAGGUGAGGGCUGGG  
>P2016  
GCGUUGCUGCAUUGCGCCCCACCGACUCCACUAUGUUGAAG  
>P2017  
AACAUUCUCUAGGUAAGUGACAGGAUGUUCGCCACACAUC  
>P2018  
CCUUCAAGCUCAACCGCAAGAAGCUGGAGGGCGGGGGAG  
>P2019  
GCAGGUGGUGGCUUUGAUGGAGGACAACAUCUACGAGUGCU  
>P2020  
UGUUGUCGUCGGAGGGGUUGAGGUCGAAGGUGAAGAGCUUG  
>P2021  
ACCCGUCCGAGCCUCCUCGAGGGCCUCACCACGGGCGGG  
>P2022  
GAUUAGCCC GGGAAGACUCGACUCACGACUUCGGGGCGCCC  
>P2023  
GGCGGCGGAGGAGGAGGAGGAGAGAGAGGCGGAGGCGGAGG  
>P2024  
CGUCGGCGCCACGGCCGAGAACACAUCUUCGCCGCCGAGCU  
>P2025  
GGGACCGCGCUGCCCGAGAAAGGGACGGACCAUACGUGUG  
>P2026  
UCCACUUCUUGAGGGAGAACAUCUUGUCGCCUCCCGACUUG  
>P2027  
CUCGCCCUGCCGGCCGCGUAUCCCCGGCUACCUGGGCCG  
>P2028  
CCGGCUUCUCUGAGUCACCAACCUGAGGCUGCCCCGGCCGC



>P2029  
GCUGCGACCCGAACGGGUGCAGGUUGUACAGCUGCACCAUC  
>P2030  
GCUGGAAUUGUCCGAGGAGCAUAAGGAACACCUGGCCUUC  
>P2031  
CUCGAAGAUGGCCGGUUGGCAGAGCUACGUGGAUAACCUGA  
>P2032  
UAGCUAGCGUCUGGCCUGAGAACCUCCGGCGCUCGGCGGGC  
>P2033  
CGGCGUCUGCGAUGGUCCGGAGCGAGGCCUCGGCCAAUCUG  
>P2034  
CCGGAGCCUCGGUUACCUCC AUGACCCCCUGCUGGCCCCCC  
>P2035  
CGUUGACGUGCAAGCGCCGCAGUCCUGAGUCGUUUCUUA  
>P2036  
CAGAAAGGCCUCGGAGGAGGAGAAAUGGAGCAGGUCGGGC  
>P2037  
CCUGAUCCAGCAGAACAGCAAAAUGUGACCCAGGUGGCACA  
>P2038  
CGAGACUCGCAGUCGCGGCCACUCGAGUCACUUCGCCAGUU  
>P2039  
CCCUUGGCACUCGCCUCGGAUUUGGGGGCUUCCUCACUCG  
>P2040  
GCAGUGGCGGCGGGCGGCGUAAGCGGAACUUCGGCCCGAGG  
>P2041  
CCUCAAGGAGCCAUCCUGCGAGCUACGAACAAUGCUAGUUA  
>P2042  
CGCAGCGGCGCGGGGCCGGGAGGCAGCGGUGGCGGGGAGC  
>P2043  
GGCGCCGGUGCAGCCCCAGCAGUCUCCAGCGGCGGCCCCCG  
>P2044  
AAAGAGAAGGAGGAAGACAAAGACAAGAAGGAAAAGAAAGA  
>P2045  
CGCGCGGCCGAGCCCCACGCAGCCGCACAGACGUAGUCCAC  
>P2046  
UGC GCGGACACCU GCUACCAAGCGGAGCUUCAGCAAGGAAG  
>P2047  
CAAGGAAGAGGACUGCAGCCAGGACUGGAAGGAAAGCUCUA  
>P2048  
AGGGCCCGUCCAGCGACCCACCGGCCGGGGCUCUCCUCCG  
>P2049  
CAGGGACCAGCCCGCGGGCCAGGGGCCUGGAUCACCUGGGG  
>P2050  
GGCGUGCGUCCAGUCCACCACAGGCGUGGGGUGCAGGGGC  
>P2051  
ACAAGGCCUUCUCCUCUUCACAGCCUCCACAGCCGCCCGC  
>P2052  
CCGCAACCCGCUAGGCCUUC AUCGCGAGCUACGCCCGGACC

>P2053  
UUUCA AUGAUCCA AACUGUCAGUCACCCCACCCAGCCUCAU  
>P2054  
UUGUUGGCAGAGGAGGAAGAAGAGGAAAAAAGACAGGCAGA  
>P2055  
CCGCCGCUGGGCCUAGCGGUAGCAGCGGCUGCUCCAGCGCG  
>P2056  
GGCGGCGGGGCUCCCGGGAGGCGCCUGCUCCCGCCCACG  
>P2057  
CGGCCCCAGGGGGCCCCGGGAGCCCUGAAGGGCGAAGCGGC  
>P2058  
AGCCGCUCAACGUCUUCUCCAGCUCGGCCACCACCAUGGUG  
>P2059  
GGGCGGCUCUCCGGAGCGGCAGGCUGGGAGGGGGCCGGGGC  
>P2060  
UACAGAAGAUGCUGAAGCUGAGGACACACCCAGGAAAAGAC  
>P2061  
CCGCUAGCUAGCCUCACCUCAGAAGCGAAUCGUGGGCAGCG  
>P2062  
GGGGACUUGCCUGGAGACCCAU CGCUGCCAGGGUCCGCGGC  
>P2063  
AAUGCCACGGCCAAGAGCCCAGGUCCUUCACGCUGGCCUCU  
>P2064  
AGCUGGAGAUUGCGCACGAGAGCUGAGGCACGCAGAGAGC  
>P2065  
CGCUGCGAGCCACGGCGGCAAGUACUCGCGGGAGAAGAACC  
>P2066  
GGGACAGGAGGCUGACCUUGAGGCUGGUGGGAGGAAGUCC  
>P2067  
GGGCUGGCGGCGGCGAGUCCACGUGCUC CCCGCGGCCGGUU  
>P2068  
CCAGCGUCAAGACCGUGAAGACGCGGAACAAGGCGCUGGGA  
>P2069  
GAAGCGGGGCUCUGCAUCCACGGGGUCCUCUGGGCUUCU  
>P2070  
GUUUUGAUCUGGAUAAGCAUAUUGUCCAUCUCCACAGCUU  
>P2071  
CCACACAGCUAGCGCUCUGAAGUAUGUCUGGGGGAAACC  
>P2072  
GCUGAAGCAGCUGGAGGAGGAGUGCCGGCAGAAGGAGGCGG  
>P2073  
CGGCCCCGCCCCGGGGCUCCAUUGUUAAGGCGGCUGCGGCU  
>P2074  
CAGAGGCGCAGCUCUGCUGGAGAGACCUGAGGCUUGCAGCG  
>P2075  
CAGCACAGGCCACCCUGAUAGUCACAUCCCACAGACACC  
>P2076  
GCUGGAAUCGACGAACAGGAAACUGGCAUGAAGGCAAAGA

>P2077  
UUCCAGAGCCAUGGGAGCGGAAAGGAGGCUGCUGUCAUUA  
>P2078  
CCGCCCGCCUCAGUGCCGGAGCCUCGGUGCGCGGCGGAG  
>P2079  
CUUCGAACGGGCAGUUAUUAAGGAAGAAAGCUGGCUGCUGU  
>P2080  
AGCAGCGGCUCCCGCUCCCCAUCCUCCUCCUCCCGGGCU  
>P2081  
GAGGCCACUGGGGCCGUGUUAGUCUGCCGGUGGGGACUCUU  
>P2082  
AGGGCGUGCGCCGAGAGGGAGCUCAGAUCGAGCGGGGCGC  
>P2083  
UCGGCCAGACGGAGAGCGGCACUGUCUCCCGCCAGCGCU  
>P2084  
AGGGGCUGAAGAGCUUCCAGACCGAGAGCGGGACAAGCCAU  
>P2085  
GCUGAAAGAAGAGUGGGAAAAGGCCAAAAGGAGUGGAAG  
>P2086  
UAAGGAAUAAUCCGAUCGGAACCGAUCUGUGGUAAACCUC  
>P2087  
CAGGAACCCAACCCAGCCGACCUUGAGCUCCAGGAGUUCG  
>P2088  
GAUGGGAGCAGGUGCUGGCCAAAGUGAAACGGGCUGUGGUU  
>P2089  
GGAGCGGAGGCGGCAGGAGGAGGAGGAAGGAUGCGCGG  
>P2090  
GAAGCGAGGCAGAACUCUAGAAAAGAGGGGUGGUCAGAGAG  
>P2091  
UUUUGAUUUCAAGAGUUAGGAGCUCGAGAACCGUUUGGCAA  
>P2092  
AUCCCGGGCCGCCUUAGCUAAGGGCUGGAAUGAAGUACAGA  
>P2093  
GACAACAGCGGCGGCGGUGGAGGCGGCGGUGGAGGCGGAGG  
>P2094  
CCCUCUUUCCUGGGGAUGGAGAAGGCGACGGUUCGGUGG  
>P2095  
GGCAUCCGACCCUCCUCCCAGGCACCGCCGCCUCGGCCUC  
>P2096  
GCGGUGGUCUAGGGAGGAAGAGUUGACACACUUGGUAACG  
>P2097  
CGCCCGCAGGGAAGAAGCACAGCUCUGAGAAGAGGAGCUCA  
>P2098  
GGAUGACGAGGAGGAGGGGAGAGACGAGGAGGAGGAGGAGG  
>P2099  
CACCUCUAUCUCCUCUAUGGAGAGAGGCUUCCAGCCUCCC  
>P2100  
CUCCCGGGCGAUCUCGACACAUUUCUCAGCCUCAUCCUGU

>P2101  
CGCUGAAGCUCAAGCAAGCAAGGCAGAGAAAAGGCUAAUCG  
>P2102  
GAAGGGGAUGGGGAGGAGAAGCGCACACACGAGCACCCAC  
>P2103  
GAGCGUGGCCCGUAUCGUGAAGGUGCAGCUCCCUGCAUAUC  
>P2104  
CGAGUGUGAGUGUAUGUGUGAGAGCGCGGGUCUGUUGUCGG  
>P2105  
CGGUCAUGGAGAUCCCCGGGAGCCUGUGCAAGAAAGUCAAA  
>P2106  
CUUCCGGGGACGUUGUCUGCAGGUAUGGAUGUUGUUCUU  
>P2107  
AUUCGAGCACUAAGAACGGGACACGGUACAAAGUCUCCAUG  
>P2108  
UUUCUUGAUGACCCUGAGCUAUGGCUUCCUCCUCAGUCCA  
>P2109  
CCGGUCUCCUCCUCGCGCAGCGGUGGCUCUGCGGCCGCU  
>P2110  
AGGUCAGGGGAAGGUGAAGCAGGACUGCAAAGAGAAGAAA  
>P2111  
CAGGCGCAGCCACCGGCGAGUCAGGAGCGCAGCGCCCGCA  
>P2112  
GGUGGAGGAGCGAGACUCCCACCCGAGCGCUCCCCUGCGCC  
>P2113  
CGGCGGGAACCAGAACCUCACUCCAGGCGCCCCACGAGCC  
>P2114  
UUGGUCAGUGUGAAUUGUGACAGCUGCAGUUGCUCCCCGC  
>P2115  
CCCACCUCGGCAGGGAAGAACUCUAAUCACUAACGCAGU  
>P2116  
CUCCUGCGGUUGGUGAGAUUACCUGGGUCUAGAGUGCGGAG  
>P2117  
UGGUGGCGCGCGGUGAGGAGAGCGCGGGCGCCCCUCCGGGG  
>P2118  
CCGCGAGAUGACUGCCGGCCACCGACACCGAGGACUCGCCA  
>P2119  
GCCGCCGCGGCGUCAGAGACACUGCGAGCGGCGAGCGCGGU  
>P2120  
UCUGCUGGCGCUGCAGCUGCAGAAUGGUCGGCGGUGGCGGG  
>P2121  
GAAGAACGAACCAGAAGAUGAGGAGGAGGAGGAAGAAG  
>P2122  
UCUGCGGGACUCUGAGGAAAAGCUCGCACCAGGCAAGAAUA  
>P2123  
GGCUGCAGGCCGCGAACACAGCUGCACCGGGAGACAGGCA  
>P2124  
CCCUGCCUCAGAAAGGCCAAUGCAGCUCGCAAGCCUGCCC

>P2125  
UGAUCCCGCCGGGGGAGUGCACGUACGCGGGCCGGAAGCGG  
>P2126  
CUAGCAUGAACAGUGUGAGGAUUCCACCAGCUUUUUCACCA  
>P2127  
UCCAUGGCGCCCCGAGAGCAGUGGGGACCCAACCAGGGCG  
>P2128  
GGGAAACUGCAGUCGAAGCACGGUGAGCCGCGGGCCGGUA  
>P2129  
ACUGACAGGGCCAGCCCACAGCCACAGGUGCGAUCAGUGC  
>P2130  
CCUGGUGGCCUGGGGGCCAGACCCGUGGGCAGGUGGGGCAU  
>P2131  
CUGGAACACGGACCUGGUGGAGACCCUGGAGCUGCAGAACC  
>P2132  
UUUAUGAUGAUAAAGACUACAGGAGAAUUCGGUUUGUAGGU  
>P2133  
GUUUGACCACCUAGAGGAGCACCGGAGAAGUUCGUGGAGA  
>P2134  
AUAGUAACAGAAACCUCCUCAUCACUUCAAGGCAUGUAACA  
>P2135  
AGGCACAGGCAUCUCGUACAAGCGGCUAUAUCGGCUGCC  
>P2136  
GUGUCCUAAGAUUCCACUAAGUGUCUCAAACCUCCCCU  
>P2137  
GAGCUGUAACCAUUUUUAUUAGAGGAGGAAAUAAGAUGGUG  
>P2138  
UUGCCAGGCGAGAAAUAAGAACCGACCAAGCCAAACACCUG  
>P2139  
GCCGUCGCCGCCACCGCCCCAGGCAUCCCCCGCAGAGCGGC  
>P2140  
GGCGGCCAGGAGUUCUCGAGUCCCUCAAUUUCGACGAGA  
>P2141  
GGAACUUGGAGGAAGAAGAGCAAAGGCUGCCGUCGGGACG  
>P2142  
CCCAGCAAGGAGGAAGGGGAACCCAAAAGACUGAGGCGCC  
>P2143  
CUCCCUCAUACCCACUCCAAAGGCUCCAGUGAGAGAAG  
>P2144  
AUGGGUGGGGGAAGGGUACAAGUCUGGUCGUGGAGGGAG  
>P2145  
AAACUGACGGGCGCAAAAACUGAGUGACUCCGCGGGAGGG  
>P2146  
UGGCUCAUUUGCGGUAUUGGAUCCAUGCCUAGAACUUUGUG  
>P2147  
AUGAUUCCCAUAUGCCCUGUAGUUUCUUUCACCUAUGGUGA  
>P2148  
AACGACCAAGAGGGUGUUCGACUGCUAGAGCCGAGCGAAGC

>P2149  
CCCUGACCUUGCGCCGAGGGACCAGGAAGGUCAGGUGCUCG  
>P2150  
GAAGAAGCCAAAAAGAAACGAAUAGAUGCGGAGCCGCCAG  
>P2151  
GAGGAGGCAGCCUAAAAUAAUACAGCAGCAGAGACAGAA  
>P2152  
GGCCGGCGGCUAUUUAAGCGAGGCCCGCCGAUCCGCUGCG  
>P2153  
UCUCACCCUUCACUUUGCCGAGGUGCCGACCCCAGCGUG  
>P2154  
UCGGGCGGUGAGGCAGGAGGAGGCUGCGGGUUGGAGCGCGC  
>P2155  
AGAAGGUCUCCAGCCGCUGAGGAUGGCCGCCUCCAGGCGG  
>P2156  
CCUGCCAAGACGUCGCGGCGACCCCGUCGCGCGGUACCCG  
>P2157  
GGCAGACGUUGUGGCGGAGAAGGGCAGUGGCUGUAGCUGCC  
>P2158  
CCCGGAGAAGGUUUUCGGUACUUUGAAUAAUCCCUUUUG  
>P2159  
UUGCGGCCCCGCUUGCGUUCACGCUGUCGCCCGGGCCGGCG  
>P2160  
UGGGCCCGCUUUCUGCCGAGAUGCCGAAGGUCAAGUCGGGG  
>P2161  
CUUAAGUCCAGUGGUGCAGGAAGCUUCAGUUUGUCAUAU  
>P2162  
CUGCCAGCUCUCUUUCGCUGAGUUCUGUUUUUCCGGUUC  
>P2163  
AGACCGGGACAAGGAACGGGAAAAGGACCGGGAAAAAGACA  
>P2164  
GCAGCUCAGCGGGGAGAAGCAGAACACCGGAGCCCGACCA  
>P2165  
UCUCGGGGUCAUGAUGGGCAGCAAGAUGGCGUCUGCUAGU  
>P2166  
GGCUCAUGAGCAAGGUGGCAAGAUCAUCAAGUGAGUCAGAC  
>P2167  
UUCAACCUCCGUUCCCCGCCACGAAAACGCUCCAGCCGCC  
>P2168  
GAUGACCCCGAACCUGCUGCAUCUCGCCCCGGAGAACUUCU  
>P2169  
GCUAAGCCCGCGUUGGGGCCAGGAGAGCUGGGCUCGAAGCC  
>P2170  
GUGGCAUGAUAAACAGUAUAAGAAAGCUCAUUUGGGCACAG  
>P2171  
CCGCAGUGUGUCGGGUGAAGAUACCCGCGGCCUCCUGUG  
>P2172  
GCACAGAGACGUUCCUCUCAAGAACGAUUUAACCCCUAC

>P2173  
CGGCCAUGAACUUACCCGGGACAGCGGCGGCGGACCUU  
>P2174  
GGGGCAGGUGGGAAGCGCCCAGGUCUAGGAGCACUGGAUG  
>P2175  
CACCUCUAUAUUCUCCCCGAUUGAAUUGAUUGUUCUUA  
>P2176  
GGGGCCCCGCGAAGCCGUGAGCCGUCGUUUUCUCCGAGU  
>P2177  
GACAGGGGCGGGAGAGGCGCAGGACUGCGGCGCCGAGAUC  
>P2178  
AUCGCAGCGGGGCAGGAUGACGCGAGCCCCGGAGCCC  
>P2179  
UCAGGACCAGAGCUGAGAGGAGCUGGGAUCGCGGCGGCAAU  
>P2180  
CCGCGCCGGUGACCAGUACCACCCGCCCGUCGAACCUCAGC  
>P2181  
GGGGGAAGGAGCGAGAGAGAGAGGUAACGCAGCGCUGCUC  
>P2182  
ACUGGGGUGAUUGAUGAGGAGAGUGGACAUGAAGGCGGCA  
>P2183  
GGGUGCGACCGUCAUGUCGGAUCCGAGUCGGAAAGCUGCC  
>P2184  
GAAGCGGGGACCGAAGGCACAACCCGGCGACCUGCGCUCAC  
>P2185  
GGUGGAGGAAAAGCGCCGGGACUGGAGGAGGAGACCAACG  
>P2186  
UGC GGCAUGUGAUCAGCUACAGCUUGUCACCGUUCGAGCAG  
>P2187  
UCAUUUCCUCAGACUUGUGAACCUCCACUAAAGAUGCACU  
>P2188  
CAUACGUGGGUGGCACAGCCAUUCUUCUGCUAUGAUAAAAGA  
>P2189  
GGCCAGGGCCAUUGAGACGCAGGAGGGGUCUGGGCAUCGAGU  
>P2190  
CCCGACGUCGGGAAGCCGACAGACCUGAGCCCGCUGGGACC  
>P2191  
CGACGACAGCGGGCUCAUGGAGUUGAAGAAGGUGAAGCUCU  
>P2192  
CUGCUAAUAAAGUUGCAGCGAGGAGAAGCGCAGCGACGGCG  
>P2193  
CGAUCAGGUCGCCUCAGCCACGUCUCCUUUAAGGCCUCCG  
>P2194  
CCCGGCGGUGGUGGCGACGCAGACGCGGAACAGGGGGAGAG  
>P2195  
ACAGAGCCAUGGUCCAUCCGAGAGAAGCUAUGUUUAGCAUC  
>P2196  
AAUCGUCGUUUAUGGACAGGACAGGCGCCACUGCCGCCGUC

>P2197  
GCCGCGCCUUGGAGCUGGAGGAACCGCGGUAGGUGGUGG  
>P2198  
UGAGCUUCUUGAUCUCCAGAUCCACGUUCCUGUCGGCA  
>P2199  
GUACUAUCCAUUGGCAUCAUGUCAAAUGUAACUCAAUC  
>P2200  
GUCUGCUUCGGGCCUCUGGAUUUAGCGCUCGCCAGCUAG  
>P2201  
GUCGGCCUCCGCGGAUCUCCACAGGCAGCGCCGCUCCCCG  
>P2202  
GGUCCGGGCUCCUCAGGUUCAGACCCGACCGUUAUCCAGUC  
>P2203  
GCGGCCGCGCGGGCGGGCUGAGUGAGCAAGACAAGACACUC  
>P2204  
AGUUCUCAUACGGGCUGCAGACCCAGGCCGGCGGACCCAGG  
>P2205  
AGAGACAGAGACCGUGACCGAGAGCGAGAGCGAGAACGAGA  
>P2206  
GAGCGACGAGGAGGACCCAGACUCCAUGGAAGCCCCAACCC  
>P2207  
AACAGAAGGAGAAGAAAAGGAGGGCUGAGGAGACUUGACA  
>P2208  
GCGUCUCCUCCACCCACAGAAUCCGUCCCCGACGGGCAGG  
>P2209  
CCAGCCGACUGUGCAAUCCACGACAAUGACCCUGGCGACC  
>P2210  
GGUGGAGGAGGUCGCAUCAGAGGUGGUGGGCCUCGCAUCAC  
>P2211  
GGUGGUAGAUCAGGGGAAGUAGCUCCCGCCGCUUCCUGGCC  
>P2212  
ACAGCAGCUCAGGCCCAGACAGGGCCAGAGGAGGACUCAGG  
>P2213  
CCACAGACCCACAUGCCCAAGGCCUCGGGACUUCCCACC  
>P2214  
GGACCUCAGGUGGCUGAAGGAGAGAAUGUAUUUGGUGUCUG  
>P2215  
UAUCUCCAUAUCUGACCUAACUCCCUCCAGCCUCACUUGG  
>P2216  
GGAAGCAGGAGAGUUUGCCAUAAGGGAUGUGACAGCGGUUC  
>P2217  
GAUGAAGGUGGAGCCAAAUGACACAAUCUGGUCUCACUGAG  
>P2218  
UUCGGUGAGCCUGGCCGCCAGACGCACCCUCUUUGUUGCC  
>P2219  
UCCCCUGUGUUUGUUUCAGAGCAGAGUUCUCUGUGGAC  
>P2220  
CGGUGCUGUGGUGCAGAGCUAGUCCUCUCCAGCUCAGCCG



>P2221  
AAGGAGAAGGGAGUGAUAGUAAGGAGAGUCCAAAAACCAA  
>P2222  
CAACCUAAAGACACUACCCAAGGGCCUGUCUGCCAGCCUGC  
>P2223  
GUUGAUGUUGCAGGUGCGUU AUGGAUACAUAACCUGAGGAG  
>P2224  
GAGGGCGACAACGCAGUGCCACUCUUACAGGAAUCCCUUC  
>P2225  
UCCAUCACUCUGAGACGGUACCUGAGAUUGGGGGCGACCA  
>P2226  
GCCUCCGCCUCCCCAGAAGCAACAUCCGAGGCUCGGCGCAG  
>P2227  
UAAGAAGGUGGAGACCGGAGAGCUGUGAGGUUGUGAGUAA  
>P2228  
AUUCACUCACGCAGGUCUUAACAGCCGCAUUCAUCUGAGGC  
>P2229  
ACGGGGUCCCGCACGGUACCACCCACUCCGCUCCUCAAC  
>P2230  
UGGAGAAGAGGCAGGAGGGCAGGAGCAGCACACAGACACUG  
>P2231  
GCCUCGUCCGCCACCUCGGACGCUCGUCCGGGCCCGCCGC  
>P2232  
UGGUCCCUGGCCCGCCGCGUAAUAGCCUCCGCGCGCCAG  
>P2233  
UGCUCGACCGAGGCACCUCCACCACCACCGUGUUAACUUC  
>P2234  
CGCUCAUCACAAUGAGAGGCACAGUGAGGCCGUGAUACGCC  
>P2235  
GGCGACAGCAGAGGAGGAAGAGGAGGAAGAAGGAAAGAAAA  
>P2236  
CAAGAAUCAUUAGGAAGCCAAACAGCUUCACAGUUCGGC  
>P2237  
GGCGUGGUUCCACUCCUCCAGGUCCUUCUUGGCCUUCUCC  
>P2238  
AACGGGAGGAGCGGGAGCGUAAGCGGCGGAAGGAGGAGGAG  
>P2239  
UGCAGGGGCUUAUUGCAGGACUCCUCGCUGGGCUGACCCU  
>P2240  
CCACCUCAUCUCCAGUGACCACUACAUCUGCACCCCCAC  
>P2241  
CAUGAGCGGGCAGCGGUGGACGUCAAGGUGGUGAUGCUGG  
>P2242  
GCGUGCCUCCAGGCUCGCAACCCUGAUGCUGCGCGGGUG  
>P2243  
GCAGCGCGGGCCAGCGGACAGAGCCCCGGGCCUGCGGGGG  
>P2244  
CCGAACGGACAGACGCGGACGGACGGGCGGACGGAGGAG

>P2245  
UUGCACCCAGCGUCUCCCUCACAAGACGGCCCGGCCUUU  
>P2246  
CCCGGAAAUGGAGAGGGGCACAUUGAAGUCCUUGCCCCU  
>P2247  
UCAGCUCCAGAAGCUGCUGCAGCGAAGACGCAAGGGAGCUG  
>P2248  
UGGGGGCAGUGGCAGCAGCACAGGGCACUCUGAAGCCUG  
>P2249  
ACAUCGGAGAGACGGAGAAGAAGUGCUUUAUUGAGGAGAUC  
>P2250  
CCCACCAACUCCGAGAGAACAGACCAAACUAACCACAUGAA  
>P2251  
UUCAGAGCGCCUGGCUGAGGAGUUCACUGAGGGGAGCACU  
>P2252  
CUACCAGGAGCUGCUGGUCAACCAGAACCCCAUCGCGCAGC  
>P2253  
GCCUCCCCGCCGCACUCUGCAGCAGGAAGCUCAGCCUCG  
>P2254  
AGCCCCGGACCUUACACGAAUCCUCUCCACCUUCCGUG  
>P2255  
GUGUGCGGGCGGAAGGGGCACGGGCACCCCGCGGUCCCC  
>P2256  
CAUCCAUAUUGGCCCAAUCAACUAUUCUUCGAUCAGC  
>P2257  
CACUGUCAGUCAAGAGGAGGAGACAGAAAACCUAAAGCAG  
>P2258  
UCGCCUGCACCAGCGCUGCAUCCAGGCCAAGCCAAGCGC  
>P2259  
CUUGCUGGGGUCAGAGCAGCAGCUGCUUGGCUGUGAGCUGC  
>P2260  
CCCUGUGUGUGUGUGUGCUGAUGUUUCCUGGGUGCCCUGGC  
>P2261  
UGGCCCGCUCCGUCACCCACAGCGCAUUGGCCACCAGCACC  
>P2262  
GUCCAGCUGGGACAACAUGGACUAUGUGUGGGAGGAGGAGG  
>P2263  
UUUCUGUUUCCUCAGGCCAACUGCAGGGGCACGUGGAACC  
>P2264  
UACCUGGCCAUCAGCAGACCAGGCCAGGGAGGUGCACUGGG  
>P2265  
CGCCGCCGCAUGACUGAGCAGAUGACCCUUCGUGGCACCC  
>P2266  
GCGGCAGGGCGGAGCGCGGCAGAGGGCAGGCGCGGUGCCGG  
>P2267  
GGACGAGGCGGAGGCGCAGGAGGAGGAGGCGGUGGGCG  
>P2268  
GCACCCAGCUCGGAGCCCGAGCGUGCCUCGGCGGCCUGUC

>P2269  
GCGGAGACACGCGGGAGCUGACCUCACGAGAACCACCCAC  
>P2270  
GAUACUUCUCCAUUUUCUUCAUUUUAUACUCUUUCAGAAUU  
>P2271  
UUCUAUUCAUGUGCAGCUGAACUACCGGGAAACUAGUGACC  
>P2272  
CACUUGGGAGCCGGAACAGCACCUUGUGAACUGUGAGGAAU  
>P2273  
UCCAGUCCCAGUCAUCAUCAUCAUCGUAUAACCCUCCUC  
>P2274  
CGCGUCAGAAGACUCCUGCAAGAGGAAGAAGCUGGAGGAAG  
>P2275  
ACGUCCGGCAGCCGCUCUCCACGAACUCGUUCAGCUCCUCC  
>P2276  
CGGGUGACAGCUCGGGAUCAGCAACCCUCCUGCUGCUGC  
>P2277  
CCGCGGCGCGGCGUCUGGCGAAUCACAGGGAAGGGGCAACA  
>P2278  
CGAGGUGUCGCCGAAAUGCAGCGGCGGGCGCUCUCCGUCC  
>P2279  
GCGGCGGAGGGCGGCUGCGGAGCGCCCGCGGGGCUGCACC  
>P2280  
CGGAUCCCAGGGGGCGGUGCAGGGCAAGUCCACAUCUUCGG  
>P2281  
GGCUGGGACCCAGGGGGCGACAGAGGCAGCAGCAGCCCGA  
>P2282  
CGACCUGCAUUUGGCUGCGGAGCUGUGGGGCCCGGCGCCUC  
>P2283  
UUGCGACCGAGGCAAACUCCACACACAGAAGUCGCCGCUUU  
>P2284  
UCUCCGCCCCUAGGAGCGCAAGAGGCCGGGAGUCAGGCGAG  
>P2285  
CAUGCCCAAGAGAAAGGCAAAGGAGAUGC UAAAGGUGAUA  
>P2286  
CUUCAGAACCUUGUACACAUAGAUGGAAUAGCUCUCCUUGC  
>P2287  
AAGGAAUGGACCAAGGAGACAGAAAUUAACUUGUAAAUGAU  
>P2288  
CCAGAAAAGGACGGCAAGAAGCGCAAGCGCAGCCGCAAAG  
>P2289  
UGGAGUUAAGAGGCGGCGGAAGCGAGGGCCUGUGGAGUCGG  
>P2290  
CCGUGGGUUCAGACUUGGUAUAAGUAAACAGCGGGUGGAG  
>P2291  
CGACACCACCGGAUGUCUACCGCAACAAGCUGCGCCGCC  
>P2292  
CCUCGACUCCUGCGACCCGCACCGCACCCCCACCCGGGCC

>P2293  
UUUUACUGAGGUGGCUGACCACGUCCACGACCAAUCCGCC  
>P2294  
ACAGAGAUACCUACAGACGGAGUGCUGUGCCACGUGAGUAA  
>P2295  
ACCAUGACUCCCUCCUAAAAAGGAGUUCAUAAAUGGCAAU  
>P2296  
GCCCGGUGCGGGCCGCCUCCAGCAGCUCCUGCUCCUCCCC  
>P2297  
GGAAGAGGCUGCCAGUCCUGAGGGGAAGAGGGUCCCCAAA  
>P2298  
GUCGGCGAGCCCCCGCGGCGACAGGUACCGGCGCCAUGGCC  
>P2299  
GCGCUCCAGGCCCGAAAGAAAGGACCAAGGCCAAGAAGGA  
>P2300  
GCUCCCCCAUCGCCUACUCGACCCCGGGGGCGGUCAGCACC  
>P2301  
GGCUCCAGUACCGGACUCCGAAACCCAAUCAGAGGCUCCAG  
>P2302  
CUCCUUGGAUUAUUCCCAAGAACCCCCACAUAACCCCUC  
>P2303  
GCUGGAAGUUGAAAGGCGGAACAAAAGCGGCAGAACCAGG  
>P2304  
GAAGGCUUAUCAAGCCCUCAAAGCCACCCAGGCAAAGCAGG  
>P2305  
GUUUCUCCUGCUCUUCUCAGGCUCCUCACUGCUCCAUC  
>P2306  
AAUUUGUGUGCAGAUAGCAGAGGCAGCAGGCCGUGCCGGGG  
>P2307  
CCCCGCCCCAGCGCCGCCACUUCAGCCCGGCCCGCGCCC  
>P2308  
GCGGGGCUAGCGCGGUUCAGCGACGGGAGCCUCAAGGG  
>P2309  
CCGAAGCGAGAACAGCCCAGAGUUGGACGAAAAGUUUCAG  
>P2310  
AACCCGGGGCUCCGAGCCGGAGCCGAGUCUGCGCCUGGGGG  
>P2311  
CGGUAAGGAUAAGAAGAAGAAACUAAGAAGAUCAAAGAGA  
>P2312  
GACCCUCCUUGGUAACUGAGACCAGGCUCUCCCAUCAAU  
>P2313  
GUAGUUCUUUGGCAGCGGGCAUGGCGGGUACCGUGGUGCUG  
>P2314  
CUCCCGCUCCAGGUUCCUUGAGCACUCCGACCGCGAAGC  
>P2315  
CUGGCGGUCGGGAGGAGACAGCGGCGGAGCGGUUGCGCC  
>P2316  
AAGACGGCCCGACCCGGGUCAGCACCAUCCCGCCCCGGGCC

>P2317  
GUCGCUUUGCUGUUCGUGAU AUGAGACAGACAGUUGCGGUG  
>P2318  
GGAGAGCGGCAUGAGGAAGA AUGUCCCUAAGGUGUUGGUUG  
>P2319  
CCCUGGGGCGCCGCUCCGCG AUUUGCAGGUGGACCACCCAG  
>P2320  
GGAGGGCGCGGUGAGAAGUG AUGAGGGCCAGUGAAGAGGGC  
>P2321  
UGGGGUGGCAGCGGCGCAGG AGGGGUCGCGGGGAGGGAGUG  
>P2322  
CCUGCCGCCGCCUGGUGCC ACCUCUUCGCCUCUUGUUGGC  
>P2323  
GGAUCAGCAAGAGGCGUUCG AGGUGCGAGAGGAGGUGCCCA  
>P2324  
GGGUUCGGGGACGGGUGACG AAAGAAGAGGGUGAGGGAAGG  
>P2325  
GGCUCCUAAUACGCCCGAGU ACGGUCAGUAGCUUGCGAGCG  
>P2326  
GAGCCGUGGUCACCAUCGGG AGGGCCCCAAAGUAACCUCGG  
>P2327  
CAGCUCGGAGCGGCCAUUGC ACGCGCCCCUCCACGGGCC  
>P2328  
UCCUCAUCAUCAACCCCA AAGCCUCUCAUCUAGUUUGUC  
>P2329  
GACAACACUCAACUGUGCAA ACCCGUCCUAUCGACAAAAG  
>P2330  
CCAGGCAGCCCUCGCAGCUC AGUGCUCUAGCCGGGGCAAGC  
>P2331  
GGCGCCCGGGCGGCCGGACG AAGCGAGGAGGGACCGCCGAG  
>P2332  
GCGGCGGCGGCGGCGGC AGCAGGAGCCGGAGCGACGGC  
>P2333  
AUCGCCCCACGUUCCUC AGCCCUUUUCUCUCCCGGCCG  
>P2334  
GCACUACCUUCUUUCCUCC AUCGCCGCCCCUGCUUCUCCC  
>P2335  
GCAGGUCGGCGGCUCGCCC ACCUGAGCCGCGCCGGGGCUG  
>P2336  
UUAGGUUUUCCUUGGUUGC AUCUGUCCUAACUGGCUAGA  
>P2337  
CCCGGCGGGGAACGGCCGCG AUCGGGGCCGCAGCCACGCUG  
>P2338  
GGCCAUACUGGCGGCGGUC AUGGUUGGCACUGCGGGCGGA  
>P2339  
UAGGCCUUUGUAAAUUGAC AGAGAGGGGAAACCCCGUAAA  
>P2340  
CGCUCCCAGUCUCCAUGGA ACUCCCGCCCGGCCCGUUGC

>P2341  
UAAGUGAGGGUGCCCUUAGCAGCCUCAGUUUUCACCGUCAU  
>P2342  
CGAUGCCUCAGCGAGGAAUAAGAGGUCAACCCGGUGCCCA  
>P2343  
ACCGACCCAGAGGAGGCCACAGGCUUCUAGCUGAGAAGAG  
>P2344  
CUCUUCAGGUGCUUCUCGUAGUGCUGCCUGGCUCGCUCUU  
>P2345  
GGGAGAGGGCGCCGGAGAGGAGGCGGCGGGCGGGCGGAG  
>P2346  
CUUCCGAGAUUGCAACCCCAAGCACAGCGGCGGCAGCAGCA  
>P2347  
CGGCUCCUCCGCCCGCCAUGAGCGCUGCGGCUGUCGGGCGC  
>P2348  
CUCCUCGCGGCGGAUGGGUGACCUUUUCCUGGCACGGGCAG  
>P2349  
CUCCUGCUGUUCGUGGGCGCUACCCGCCUCCGGCUGGCUGAC  
>P2350  
GCGCGACGACGGUGCCCAGCAGUUUUCCCAAGAGUGAGACC  
>P2351  
UCGCAGCCCGGCGUGCCUGCAGCUGCCGUCGCUCGGGAGCA  
>P2352  
CAGCGCCUCUGUCCCUAGAACGGCGCUCCCCCGCCCUAG  
>P2353  
GGGCAACGGAGGGAGACGGCAAGUGCUGAGUUUCCGGAGG  
>P2354  
UCUAGGCUAUAGAAAGCGCAAUUGGUGGUAACGCUUAUCAA  
>P2355  
GUGGCUUCGGCAGCGGCUUCAGCAGAUCGGCGGCAUCAGCG  
>P2356  
CAUCUUGACGGCAGCGAUACAGUCGAAUUCUGCUUACACC  
>P2357  
UUGAAACUAAGGGAUGAGGCAUCCAGGACCUAAUAAAAAA  
>P2358  
UCCGCACCAACGCGCCCGCCAGGCUUGGCCGACACCAGAC  
>P2359  
GACCGAGCGAGGCAAGAGGAGAGCGCCGGCGGCAGGAGGA  
>P2360  
CCAUCUCGCUCUGUUCUCAAGACGCCACCGCCUCCCUU  
>P2361  
CAAGUCUCUGCCAGGAGCCGAUACAUGGCUGUAGAGGACA  
>P2362  
CAGGCUCUCGUCCUCCUCCAGGGGCAGGCGGGCGGGGAGG  
>P2363  
CGGCGAUGGCCGAGCAGGAGAGCGCCCGAACGGCGGCCGC  
>P2364  
CGUCCAGCCCGGGCCUGAGCACAGCUUCGCCCUGAAAGUCA

>P2365  
CUCAAACACACUCAGUUCAAGCUCCACAUCUGCAGCCACG  
>P2366  
AGCAGCGUCGGCGCACACUCAAGAACCGCGGCUACGCGGCC  
>P2367  
GUGCACGCACGCCUGCCAUCAAGCAGCAGGGCUGAGGGGG  
>P2368  
AUCUCCCCACGGACUGUACCAGGCAGCUGGGCCCCGCAGGA  
>P2369  
CGUCAGGGGACAGUACGGUGACCCGGCCUGCAGGUGGCAGU  
>P2370  
AGCGGGGGAGAAGUUGUGGAUGGCGUCCUGCACGAUGUCC  
>P2371  
CAGGCAGCAGCUGCAGGAGGAGCUCCGGCAGGUCAGCGGCC  
>P2372  
CACCAUCUUCUGGAGCCCCAAGGACAGUUCGUGGUGUUGG  
>P2373  
CGAUGUCGACGAGUUUCUGGACAAGUUUCAGUGCUGGCG  
>P2374  
CAUGGCUAGGCCUGUCCACAGCUCACCCACCCAUAGCUA  
>P2375  
GCUGUGGCAGCAGCUACGGCAGUGAGACCAGCAUCCCGGCC  
>P2376  
AGCUCGGGGUCCCCGCUCAAGCCUCCACCCGGCCCCGCGCG  
>P2377  
UGAGGAGGGGUCCUGGUGGAGGCUGGGCCAGGCGGUGCCC  
>P2378  
UUGUUAGGGAGAGAAGAGGGAGAGGCAGGAGCCGGCCCAAG  
>P2379  
CGGCUGCCAUGCUCUCCAUCAGCUUGCUCACGGCACCCCCC  
>P2380  
GCGUGAGGAGCCCUGGCCUCAGAGGGCAAGGCAGGAGCUCG  
>P2381  
CGAGAAUGUGGUCGAGAAGAAGACUUGGAGUUGGAGAAGG  
>P2382  
UGCCAGACUCGCCCCGUGGCAGACAAGAGGGCAGGGGCAUC  
>P2383  
UUGGAAGUUGCACACUGUACACUGUUAAGAAGUUGAGCUUU  
>P2384  
GCGGGCUCGGGGCGCGGCGGACGGGCGCGGCCUUGCGGGC  
>P2385  
AGAGGAACUGGAGGAGGAGGAGGAGGAGGCAGUGGACAUGG  
>P2386  
GGCAGAGGUCUCCGACUGGAAGGAGAGAACCGACCUAGCC  
>P2387  
GCGGCGAUUCGUGCAGCAGCAGCGGCAGCAGCAGCAGCAGC  
>P2388  
UGGCCGCGUGCUGGGAGGAGACUGGAGCCCCGGUUAGGAAGA

>P2389  
AGGCCGGUGCCGCUUUGGAGAUCCGGUGCUGGAACGAACAUC  
>P2390  
GUGCAGCGGCUUCCCGUAGGAGCAGCGUUCUGCCGGGCUUG  
>P2391  
UCUGCAAACUCGUGGCUCGUAGUUGAGAACUGGAAAUGCGU  
>P2392  
GCCCCGGUUAUGGAGGAGGAAGAGGAGGAUAUGGUGGUGGA  
>P2393  
UUUUUUUAGCAAAAAAUGGGAAAAAACAGAAUGGAAAGAG  
>P2394  
CGAUUUGGAGUGCUGGAGCGAGAAGAGCAAAAGCUGCGUU  
>P2395  
CGGCGGCGGCGGCGGCUGCAACGGGCGCGCCGGCAACUUCA  
>P2396  
UGGAGUCUUUGAAGCCACUGACCUAGAACACACUGAUUUUCA  
>P2397  
UAGCCAUGGCGGCUAACGCUACUACCAACCCGUCGCAGCUG  
>P2398  
GAGGGAGGGUGCGAGGGGAAACCGGAAGGAAGAGGCGGCGG  
>P2399  
GCGGCCGCGUGAGCCGCCGAGCAGGAGCUGCAGCGACGUC  
>P2400  
UAGGAAACUGGGUCCCUUGAAGAAUCUACAGAUGAGUCUGA  
>P2401  
UCCCCCAGCGCCGUGUCCGAGCUGCUCGGCAUCGCCUAGA  
>P2402  
UUCUCCUCUUCUCCCUUCCAGCCCGCUCUGGGUCGUUGC  
>P2403  
ACACCAACCACCACCACGCCAACUUCUCUCGGGCUGAAA  
>P2404  
GGGAGCGUGAACGCCCCUCCAGCCUUCGAGUCGUUCUUGC  
>P2405  
GGAGGAAAAGCGGCGGGCCGAGGAGGCACAGCGGCAGCUGG  
>P2406  
GGAAAAGAAGAGACAGCCAUAGACGAGGAGCCAGAGUGGGG  
>P2407  
GGCGCGGGCCGGGGGCCGCCACGGCGAGGGGCCGGGCCAGG  
>P2408  
CUCUUGGUUUGGUGACAUGUAGGGACGCUGCUGCUUGGGG  
>P2409  
GGGACCACCCCCAUCUCCUACCAGUCUGACAUUCCAGCA  
>P2410  
CACUGCGACACCGGCGACAAACGCAAUGCUCAGGGCCGGA  
>P2411  
UUUUAACAGGCAGUCAUGGAGUCAGGUAUUGCAGUUUGUUG  
>P2412  
CCCUAGCUGCCAGCAGACAAAGAACCUCACACUUCACAGCU



>P2413  
CCGCGCGCCGAUCGGUCGUUACCGCGAGGCGCUGGUGGCCU  
>P2414  
GCCACCAGCGCCUCGCGGUAACGACCGAGCGGCGCGGGCA  
>P2415  
GGAGGUGCUGAAGAUGCAGCAGGGGCGGCAGGGCUGGAAGG  
>P2416  
CUGGUGGCCGUUGGCACGGCAGUGUGCAGGGACUGGCUGAA  
>P2417  
UGUACGCGCUGGUGUGCGAAACGCAGCGCUACUCCGCCGUG  
>P2418  
ACCAACGCUCGGAAACCGCCAGACACCAACGCUCGGAAACC  
>P2419  
UGGGGAAGGGAGGGGUGAGAGGGCGGC CGAACUCCGGCU  
>P2420  
CCGCCGUCGCCAUCAGGGCCAGCAGCCCAAGCAACACCGAC  
>P2421  
GCUCCUCCCCAUCGCCGGCCAGGGCACCGCAGCUCCACGCU  
>P2422  
UCUUGUUUCUGCCUUCUGCA AUGUCCACACGAAGUGACCG  
>P2423  
CUCAGAAUAGGGCACCUGUAAGUCAGUCAGUGAAGUCUCUG  
>P2424  
GGUCCACCUUCUCUUCCGCACGCUCUCCACGAGCAGCCGG  
>P2425  
CUCCUGCUCCACUCCUUCACCUCACUCCAUGAUGAUGU  
>P2426  
AGGCCCGAAACCAGCAGCGAGAGCAGCGCAGUGAAGAAGG  
>P2427  
CAAUUCUUGAUCAGGUAGUUAUCCAGCAGGCUCAGCACAUC  
>P2428  
AUUUUGGCCCGUGUGUCGAUACCGCCUCUGGACGUGGU  
>P2429  
GUGUUGAGGACUUCGCUUCGAGGAGGGAAGAGGAGGGAUCG  
>P2430  
GCGCGAUCCCAGCAAGCCCACAGCCACCAGCCGCCCAUG  
>P2431  
GCGAAGGCUGCUCGGAGCAGAGCCUGGUUCCGAGGGGGCGC  
>P2432  
GGACGGGCUCGGAGCGGAGGAUUCGCGGACUCUGGGCAGUC  
>P2433  
ACGGGUGCGGUCCUUGUUCAGGCGUGGCAGCUGAUGGGCU  
>P2434  
AUGGCGGCGGCGGCGGCCCCACCGGCCCGGCUCCCCCUCGG  
>P2435  
UCGGCCGGCCUGAGCCCCAGAGUCAGCUCCCCUUCUCGCC  
>P2436  
GCAGAAAACCCUGAGGAGAAACCAGGAAAGAGAAAAGAG

>P2437  
CGGCGGGCGGGCUGCAGCUACGAACGGGACCGGAGGAAGC  
>P2438  
GCGGGGCCAAGAUGGCGCCGAGCGCCGGGUGAGCAGCGUCU  
>P2439  
GAUAGGGCUUUACCUUGGUACAUCCGGGGUGGCGUGCCAGA  
>P2440  
CCCUACUAGCCCGCGAGACCAAAACAAGAGGCCCGCGAGAC  
>P2441  
ACUUUCUCAGCUGUUCUCCACGGCCUUCGCAGCAUCAAG  
>P2442  
CCCGGGGCCAUGCUGCCUGCAGCCACAGCCUCCUCCUGGG  
>P2443  
CCGCUCUGCUGGCUGGCGGGACAUGGGGAACGGCGGGCGCA  
>P2444  
GGGUUCGUCCAAAGGCCCAUCGCCUUCUUCGAUGCUCUUCU  
>P2445  
UGGACCUGGGGUCGCGGUACUUGGGCUGGCCGGCGAACC  
>P2446  
GCUGAAGCGGGAGCCAGCUACCUGGUGCAGGUACGGGCGC  
>P2447  
CUCGGCCCGGGCGCGAGCAGAGCCACUCCAGGGAGGGGG  
>P2448  
GGGCGUUGGCGCUGCGUGCCAGGGCCUCUGCCUCUGCGUCU  
>P2449  
GCUCCGGCUGCUUCGGGGGCAGCCAGGUGGGCCCCGACAUG  
>P2450  
CUUUUUGGUUCCUUCUCGGAGUCUUCUUCUUCUUCUCCU  
>P2451  
UUGUACUCCCCCAGGUUUGACCCAGGACUCCCCUACCCA  
>P2452  
AGCAGGCGGCCCGGGUGGGGACUCAGGUGGAGGAGGCGGCU  
>P2453  
GCGCGCGCAGGAGGAGGCGGAGGCGGAGGAGCGCCGGCUGC  
>P2454  
CGGGGAAGCCGGCGCCGAGGACAAGCGCUCCAGGAGGAGA  
>P2455  
UUGUGCCAAUGGUGGAGAAGAAAACUUCGGGUAUGUGAGCC  
>P2456  
CCUGGAAGUUGUCAUUCUCCAGGGCCUCCAGCUGCCGGUUG  
>P2457  
AAUUCGGCCAGCCAGAUCUCACAGCUUGAGCAGCAGCUGAG  
>P2458  
CCUGAAGAAUCCCCAUGGAACUGCCCUUAUCCGCUGUCC  
>P2459  
UGGUGUCCUUGUUAUGGUGAUCCUAGGAAGACACAGAGGC  
>P2460  
CACUUACUUCUCGCCUCGAAAGAGCAAGAACGACUCGAAGG

>P2461  
CCAGCAAUGCUUGCUGUCUGACUUCCUCCUCUUCUUCUCC  
>P2462  
UACUCCUCGGUUCCUGGUGAAGAGGCUGCGCGCUGCUGUUU  
>P2463  
CCCUAGCCGCUGGGCUCAUCCAGUGGCCUUCGCCGCUCUCU  
>P2464  
AAGCCGGACAUCCUCUGAGGAAGGAGGGAGAGAGAGUCAG  
>P2465  
UUCAUACUGCGCCGCAUCGAAGGCCGCUCCGGGCCACUCAC  
>P2466  
GGGUAGCCCAGGGCCGGGGAAGGGGCAGAGACCUCCUU  
>P2467  
UCGCGGCAGCAUGGCGGACUACCUGAUCAGCGGCGGCACCG  
>P2468  
CGACUGAAGACGGGAGCGCCAGAAUCUGUGGACUCAAGAGU  
>P2469  
GCUGGAGGAGCUGGAACUUGACGAGCAGCAGAAGCGGCUGG  
>P2470  
GCCCGCAAUUGGCAAUGGCAACGGCGGCGCAAAGGGAAGC  
>P2471  
ACGGACUCAUCUAACAAAACAGCACCGACUCCAGCAUCCAG  
>P2472  
GCUGUGGCCCGGGGCUCCCGAGUCGCGCUGCGGCGGCUCUU  
>P2473  
GGCAGCUGGACGCCGAGAUCAGGCGGACAAGGAGAAGGGG  
>P2474  
GCGCCUCCUCGCCUCCCCACCGACAUCAUGCUCAGUUC  
>P2475  
GGGAGAGCAGCAGCGGCCAAGCAGGAGCUGCAGCGAGCCG  
>P2476  
UCACCUGACGAUCUAACCCGAGCAGCCCAGCCACGCAGGGG  
>P2477  
UAACAGCGCAAUCCUAUUCUAGAGUCCAUAUUGACAAUAGG  
>P2478  
ACCCCGCGCUCGGCGCCGCCAUUUCGCUUUUCCCGGGCU  
>P2479  
ACUUCUUCUGCGGGGCGUAAAGCCGGAGCCGAGACCGAA  
>P2480  
AUCUCCGGACAGCUGCCCAAGGGAUUGCAAGUGCUGCGGC  
>P2481  
UUCUCGGCCAUCCCGGUUCGACCUUCUAGGGAAAGCAGGCG  
>P2482  
CCGGUUUGACCUUCUAGGGAAGCAGGUGAGCAGCCUGCGA  
>P2483  
UGCCUGCCUAGUGCUGGAGUAGGGGACAAUGGGAUCCUAG  
>P2484  
GAGGCUCCCGGGCGCCUUCGAGGCUUCCGUCCUGGGCCUG

>P2485  
GCCCAAAGCCCAGCCUGGGCACC GCAGCUACAACCUUCAGG  
>P2486  
AGUGGCGGUCAGGGGAAAGAAGGGCCGGUACUGGAUCUGGC  
>P2487  
CCCCAACGCCAUCCCAGCCCAGCGCAGCCAUGGCAGCUACC  
>P2488  
AGAGCCCGCAAGCUCUCCACAGAUCUGAAGCGGUGCACCUA  
>P2489  
CGGGCGGUUGGGAGCGCGCAGCUAGCGAGCGAGAGGCAGC  
>P2490  
CAGGUUCCUCCCGGCUCCCCACUGCGGAUCCUCGCGGCUC  
>P2491  
CCCACACUGGUUCUCCGGGACGCCCUUCCAAAUCAGCCUU  
>P2492  
AGGGAGACGUAGAAAAGGAAAGAAGGCGCAGGAAGCAGAA  
>P2493  
CCCUGCCUCGCCUGCCCCUCAUCCACGCCGGCCACAGCUCG  
>P2494  
GCAGUCCUGGAGCUGUGAGGAGAUUCGGGCGUCACCCUGC  
>P2495  
ACGUCUCACGUUUUCCAUGACAGAUGGCACUGUUCAAAUG  
>P2496  
AGACUUUUUCCUCCUGUCCAGUGGCCAAGGAAAGAGGGA  
>P2497  
GGGUUAGACAGGUACCGGUCAGAUUACGGUGGCACAGGCGG  
>P2498  
CGCCCAGCCUGCGCCCGCAGCAUGCCC GCCCGGGCCG  
>P2499  
GCCAGGAUGGAGUUCGUGAAUGCCUUGGCCACCCCGAAGA  
>P2500  
GGCGGUGGGCUGCCGGCUGCAGCGCUCGGGGGCCCGCGGC  
>P2501  
GGCCGGAGUUGCGUCGCCUAGUCCUCCUGGCUGCCGCCGU  
>P2502  
GGAGCCGGGGCCGGGCGCAUCAUGCUGAGCCGGCUCGGG  
>P2503  
CUCUGCUGGGGUCUCAGCGGAUUCGGGGGUCUCUGUCAGGG  
>P2504  
GGCAGCGGUCAGGCGGGGAGCGUGGGGAGCUGGGGGCCGU  
>P2505  
AGGUCCAGCCAUCCCUGGACCUGGGGACCUCUCUCCUA  
>P2506  
GACGAUGCCCGAUCUACUUUAGGGCUGAAACCCACGGGCC  
>P2507  
CUGAGGUCAACUCCGACCGAGAAGCCUGGCGCUGGGACCA  
>P2508  
CGUGGCAUUCGUUCAGACUCAGUUGUUGGGGGGAAGUCCCA

>P2509  
ACGGGUCCCUUGUGUGGGGGAUGGUGUGUGGCCAAAACUGG  
>P2510  
CGCGGAGGAUGGAUGGGGACAGCCGAGAUGGCGGCGGCGGC  
>P2511  
GGGAGGUGCAGAUGGCAGGAGGCGGCGGCGGCGGCGGCGG  
>P2512  
UCCCCUCACGGUGCGGCCGCAGCGGGCCCCGCGCCGGGCUC  
>P2513  
GUUUGGCAGGCAGACCCAGAAAUCCCUGGAGCGCGGCGGAC  
>P2514  
AGGACGGGGCGUUCGUGGGGACGCAGUCGGGGCACCAGGAA  
>P2515  
AGGCGGGGCUGGGGCGGCCAAACCCGGGGCUAUGACACCCC  
>P2516  
UCAGCUGCGCGGGCCCCCGGAUCCCCGACAGAGCGGCGGC  
>P2517  
GCCGCACCCACCGCCGCCCCAGCAGCAGCACAAGGAAGAGA  
>P2518  
GGCAGAGGAGGAGCUCCUGGACAUGGCGGUGCUAAAGGACU  
>P2519  
GCCCCGGAACCGACCUGUGGAGACCGCCAUCUUCUCCUGCA  
>P2520  
UCAGGAAGCCCGCGCGCAACAGCCAUGGUGAGGCGGCAGUC  
>P2521  
GCAACUCGGCCUUUCCUGGGAGGGAGUGAUGGGGCGCACCG  
>P2522  
CUGAGCCCGGCGAGCAGGAGAGGAGGUCUUCGGGCCGCGG  
>P2523  
CUCUCACCUAGCCCACAAGGAACCGCUCGCCGCCCGCCU  
>P2524  
CGGACACCCUGAAACUCACCAGAGACCCGUUCGCCCCCGGC  
>P2525  
GGGCUGGUGAGGGCUGGCGGACCUCCUUCAGUGCGCGGGGG  
>P2526  
CAAGAGAAAGGGAGGCCGGCAGGGGCCUGGGGGCAAGAGGA  
>P2527  
GCCCCGGUUCUGCUCUCCCCAGCUGCUCACCGACUCGCCGC  
>P2528  
GCUUCGAAAGGCAAGGAGGAAGCUUAUCUAUGAAAAAGCAA  
>P2529  
CACUCGUCAGUCCCGCAGCCACCGCAGCCGGGUCCCCGCGU  
>P2530  
CUACCAGGGCUACUGGGCGCAGGGCAAGCGGCACGGGCUGG  
>P2531  
GAGAGGCAGGAAGAGCAGAGAGGGAGCCCGCCUUGAGGGC  
>P2532  
CUUCGCAGGCGCUGAGGGUGAGAGGCACGCUAAACUGCUCG

>P2533  
AAGUGGCUGGAUGGUUAUUCGAAAUGGUUAUACAAUGCUGC  
>P2534  
UCAGAGAGCAGCCUCCCCGGAGCACCAACUCCGUGUCGGGA  
>P2535  
GCGGCCGUCUCCUCGCGCCGGAGCCGGGGAUCGGCCGCUGCC  
>P2536  
UCCUCCUAGCCAAAUUGCUCACUAAGACCAAGUCCUCGCU  
>P2537  
AAAAAUCAACCGGAAUUGAAACUACUCAACGGCCGCAGAA  
>P2538  
ACCCGCUCAGGAGGGGAAACACGAGAGCCGGGAGCACAACA  
>P2539  
CUUCCCAAGUGACAUCGUAAAGCUCUGAGACCUUCGCCAUC  
>P2540  
UGGUGAUCUGGGGGGAAGGAAAUUCCCGUCGGCGGCCAGU  
>P2541  
AGGACUCGGUGUUCGAGGAGAGGCCGGAGCGGCGGUCAGGA  
>P2542  
CCAGUUUCCACCCUCCUCAGGGCGGCGUCCUCUUCUAU  
>P2543  
GAGGUGGGUCUAGGCAGGGGAAUUGGGGUGCCACCAGACG  
>P2544  
CGGGCGGCCGGCUAGGGUGGAGAGCCGGGCGAGCAGAGCU  
>P2545  
GACGACGAGACCUUCAUCAAAACAUCAUCAUCCAGGACUG  
>P2546  
GGCUUAGGCGGCAAUCUCCAAUUGGGGCUUGGGGGCCAG  
>P2547  
UGCCUCCUAGGAACGCCGGGAAAGGUAUGGGCUUUGAGAAG  
>P2548  
GAGGAGGAAGAAGAGCGGAGAGAGAAGGAAGAGGCGAUGUG  
>P2549  
CAUGGGGGUCUCCAGGAAGAAACCAGCCUUGGGGGAUUCC  
>P2550  
AAGCGCGGCUGCUGUCGCCCAGCGCCGCCCGUCGUCGUCU  
>P2551  
CAGGUGGCUGAGGCCAGGGCAGAGCUGAGGAGGGCGAGGGC  
>P2552  
UUGUCGAACCAGAUCUUCUCAUGUGCUAGGAAGUUUGUAGC  
>P2553  
GGGCUCUGGGCUGGUAGGCAAGCCAUCCAGAAGGUGGUA  
>P2554  
GGGUGCUGACGACCUGCGGAAGAUGCAGGAGGAGGAAGGUG  
>P2555  
UGUUUCCUCCUCCUCCUCUACCUCCUCCUCCUGAGGACUA  
>P2556  
CCUCGCUCGCCGCCCCUCGAUGCUCUCUUCAUCACCUUG

>P2557  
UCCGGCACGGCCUGCAGCGAAACAGUGCCGCUUGUCCACCGA  
>P2558  
GUCAUCAGGCAGCCUCAAGCAAUUCCUCAAAAAGACCAAGA  
>P2559  
GGCCGACAUGGAAGGCACUUACUAGGGGAACAGAGGCUGGA  
>P2560  
CAUCGAGGAGCGCCUGGCCAGCUGCGCAAGGCAUCGGACA  
>P2561  
CAAGGUGCCCCUGGCUACCACCCGUGGAUGUGGAGAAGG  
>P2562  
GCUCUUGUCGGACCAGGGCUACCGGGUGGACGGGCGGCGCG  
>P2563  
GGCGAACCGGGUCCGACAGGAGGCCAUGGCGGGCAGGGC  
>P2564  
GGCAGUGGCCUUGUCGUCGAAGUCUGGCCUUUCCCGAGGCC  
>P2565  
CUCUCAGCCACAGCACCGGCAGCGAUUCUGGCGUCUCCGAC  
>P2566  
GUACCACUGCUGCAGUCCGACAGCAUGCUGCUGGUGCUGU  
>P2567  
CCAAAGCCAUCCAAGAAGAAAGCAGAAGGUGGCGGCGCAGA  
>P2568  
CUUGCUGGGGCUGAAGAGGGAGCCCGAAUCCCAUACAGCA  
>P2569  
GGGCACCCACCACUCACCUCUACAGCUCCGGCUUGUUCCC  
>P2570  
CAGCCUUCUGUUUGACCCCGAGACCUCUCCUCCUUUGAGCC  
>P2571  
ACUCUGAAGGCAGCUCGCUCACGGCUUUCUCCACGGCCAGG  
>P2572  
UUGGUUCUGGGACCGGGCAGAGUCAGCGUCGUACAGGCUAG  
>P2573  
GCAGCACCGCCCCGGCGUGACCUGCUGGUCGUUCCGGCG  
>P2574  
CGGGCUCGGUGCGACUGCGCAGCUCCUCGGCGCUUCCUCGG  
>P2575  
CAAGCAAGCCCAGGCAGCCAAGAGAAGAAGAAGAGGAGGA  
>P2576  
CGCCAGCGGCCGUCCUCCUAGCUCCUCCGGGGACUUGGC  
>P2577  
AAGAGUUUUACCAGCUUCUGAGAACCUGAUCAAUCCAAGC  
>P2578  
GAAUGUGUCACCGCGCUGGGAAGUUCAAGGUUACAGCCCC  
>P2579  
CAGUGGUGGGAACGACAAACAGGUUUCUCCCAUGAAGCAGG  
>P2580  
ACCGAAGGUCCUACAGGGCCACAACUGCCCCCGCCACAACC

>P2581  
CGGUCCACUCGUCCCGCGCACGGAUGGCCUCCAAGUGGCU  
>P2582  
CCGGCGAACCUGACCCAAGCAGCGGGACGCGUCCCGUGCG  
>P2583  
GUGAUUUGUGACAAAUGUGAAGGUACGGUGUUUUUUUGUUU  
>P2584  
GCUGGGGCCUCGUCCCGGAGAGAUACGGCUAUGUCGAUCGA  
>P2585  
CAACUCCUCGCUCCGGGUCGAGCGGCGCCGGGUUUUCUUCU  
>P2586  
CGACUGGUCCCUUGCCUGAUAUCUGGGAACCCCCCCCAC  
>P2587  
GGAAGGACUUGAGCCGGGAAAGGGAAGGGGAAGCGAGAAUG  
>P2588  
AACCGAUCCUCAGCAACGCCAGCAGGCGUCAGAGGCGGACG  
>P2589  
UGCACAGUGAGGCCUGGAGCAGGGGCCGGGAUCAACAGAGG  
>P2590  
UUCAUGCCCUAGGGCCCCCAAGUGCCUGCCCUCCCCAGA  
>P2591  
GGUCGUCCACUGCACCCCCAGGGCCUCCGCGUCCUCCUG  
>P2592  
CUCCCUUCUCCUUCUGCGAGCGCUGGGGAGAGCUCGGCC  
>P2593  
GCCUCCCCUGUCCAGUCUCUAGCUCUCUCCUCACGCACCA  
>P2594  
CCAACUCUGCCGGCCGCGGGACCCGGGUGAGGGUCUGGGCC  
>P2595  
GUUGGGUCGGGUGGCAGUUGACUUGGUGGCUGGCAUGUUCA  
>P2596  
UCCUGUCGCCUCCUCGCCCCACUUCGGCCUGUCCUCUCUC  
>P2597  
CCUGAGCGAGGAGGCCAAGGAGCCCGGCGGAUCAACGACG  
>P2598  
CCACCUGCCUGGGGGCGUCCAUUGGUGCGGCGGCCAGGGCGG  
>P2599  
CAGUUGUUGGUCCGACCAGAACGCUUCAGUUCUGCUCUGC  
>P2600  
CUGUCCGGACCACGGAAAUAACGACGCCGCCUCGGCCGCCG  
>P2601  
CCAGCUCGGCGCCGAAGCACAGGCGGGCCAUGUUCUCCUUG  
>P2602  
UAGCCCCUUUCGGGGCGGGACCCCGGCCGCAGGUACCCA  
>P2603  
CGGAGAAGAGGACGACGACGAGGUCCUCGAAGUGGACCCGU  
>P2604  
UUUCUGGAAAUUGUCCAGUCACGUGCAUCUUCAGCCAAU



>P2605  
GCCGGAGUGGCUGCGCGCCGAGGUGAAGCGGCUGUCCCACG  
>P2606  
CCACCUUGUCGUCCUCCACCACACACUGAAUCUGUAGCUUC  
>P2607  
CGGUGGUGCGGGGAAACCGAAGUGGGCGGCGGCCGCGGCG  
>P2608  
AGAUGAAGAUGAGGAUGAGGAUGAAGGUGGGCCUAAUGCAU  
>P2609  
GUGUCCUGAGACUGUCCACAUGAAGACUCUUCUGGUA AUG  
>P2610  
AGAAAGAGAACGGGAGAAGGAGAAGGAGAGAGAACGAGAGA  
>P2611  
GCUUUGUAGCGGCCCGGCUAGAGAGUUGUUCUGUCCCUG  
>P2612  
CGCUCGCGUGGGCGAAUGUGACAAGCCCCACCCCCACCGC  
>P2613  
UCGGCCCGACCGCGCGCGGGACCCGCGGCGCCGGCCCGGGA  
>P2614  
ACAGCCGUCGUCAGACUCCAGCAGCCAAGAUGGUGAAGCA  
>P2615  
CUGCCGGCCGGCGCUGGUGAUGCUGCUGGCGCCCCUGCUG  
>P2616  
CCAACUUGAGCUGCUCUACCAGCGCUGCAGGGCGCUCGCG  
>P2617  
GGGCUAACCGCGAGCAGAGGAGCAGGCGGCGGCAGCAGGG  
>P2618  
GCCGCCACCUCUCUGAUCUACGAAAGUCAUGUACCCAAC  
>P2619  
AGCCUUUCUUCGUCUUCAUCAUUGUCCUCAUCCUGCUCUU  
>P2620  
UGGUGAUCACGGCAUUGGGCAGGUUUAGGUCCUCGGGCCUC  
>P2621  
GACGUCUCCGCGUCCCCGGAUUCAGGUUCGCGACCCCCG  
>P2622  
UCGGGGGCGCCGAGCCCCUAUGCCGCAGCCUCUGGGCACC  
>P2623  
ACCUUGAGGAGGAAAGCGAGAAAGAAAAGAAAAAGCAAGU  
>P2624  
GGAGCGGCGGGAGCAGGAGCAGGAACAGCAAGAACCAGAGC  
>P2625  
UUGCAGGUCCAUUCUGGAUGAAGAGGAGGAGCAACAGAAAC  
>P2626  
GCGGAGCCUCCGGGACGGCGAGCGGCGGGCGGCGGAGGAGG  
>P2627  
GCCUAAACUUAUCUCAAUAACAGCCAUUGCUGCCAAGGAG  
>P2628  
CCAGUUUCCGGACCUUUGGAGCUUGUAUCCCCUCUUGC

>P2629  
CAGAGAGAGCCGCGGCCGGGAGCUCGCGGGCUCCUGACAAC  
>P2630  
UAUUAACCAGACUCAGAAAGAAAACCUCAGGAAAUUCUACA  
>P2631  
UGCCGCGGCUUGUUAUUCUUAAAUGGCGCCGCUAGACCUG  
>P2632  
CCGCCUCCACCAUGCCGCCGAGUUCGACCCCAACGAGAUC  
>P2633  
CUGGGCCCUGAGCUGAAGGCAGAGCUCGGCCCGCGGCUGAA  
>P2634  
GCGGUGGUGGGAAGCUCGGAGCGCUGUGGGAUGGGGGCGU  
>P2635  
GGGAGAUUUCAAAGCCUUGAGAAGAGAACCACAAUGCA  
>P2636  
UCCCCUUUCUCUCCCCGAGAGAAGCUGAAGAAAACCAAGA  
>P2637  
CCACAUGUGUGACCUCUCUGACUUCUCUCCUCCACCAAGG  
>P2638  
GUCCUGGGUGUUGGGCUGGGAGGGUGGGCGGCCGUGGAGG  
>P2639  
AUCUCUUCUUCAUCCUCAUCAUCCUCUUCUUCUUCAUC  
>P2640  
UUGCCUGCAGGUAACCUCGAGGCUAUGGCAUGGCAUCCCC  
>P2641  
CCAUGGCUUCCGGCUCUCCAGGUCCUCCGGGAUGCUUGGC  
>P2642  
AGCUGAACCCCGCCCCAGAGCCCCAGCAGGGCCCUCCG  
>P2643  
GCUCUUCUUUCCACAGUUGAGAGAAUAUCAGCAGAGGAAU  
>P2644  
GGCUGCGCCUUGUCAGUGGAGGUGGAGUUCGGGUGAGUCA  
>P2645  
CCGCAACGCCCGCAGCCUCCAGCCACGGCCCCAGCAGGAGC  
>P2646  
CCAGAAACGCCGCCUUAUGAAGUCGUUGAAGUCGGAGGCCA  
>P2647  
CCCAGCUGCGGCUGGAGGAGAAAACACGGGAAUGUGGGACC  
>P2648  
ACGCCUCCGCUCUCCUCCUCAGCUCUGCCCAGGCUGACUUC  
>P2649  
GGGCUGCCUCUCCAGCUGCCAGGGAACACUUGAGCGGGAAG  
>P2650  
CUCCGGCGCCGCUUCCGGGAGUUUCAAGUUUGAAAGUCC  
>P2651  
GAUGACAAAGGUCUGGUCCCAGGACUGUUCGGCCACCUGCC  
>P2652  
CCUCACCGGAGUCUCCUCGGAUGUUGGCUCUCCUGGGGGAGGU

>P2653  
CCAGGGUCAGGCCGGCCCGCAGCGCCCGCAUGGCCGGGGAG  
>P2654  
ACCUCGGACCUGCAGAGGGAAGGUGGGAGAGCUUGGUGCAC  
>P2655  
AAAAAAUUGGAAGGAUCUCAAGCUGAUGAAAAACUGGAGC  
>P2656  
GUCUCUGAGCGGUCCACGAUACCCUGCUCGAUCCGUGACUU  
>P2657  
CCAGAGUCAGAUUGAGGCAGAACUGAAUAAACAUUGGCGGC  
>P2658  
CCGGAGGGGCCAGGCUGGCCACAGAGGGCACCACAGGCAUA  
>P2659  
CCUUCGGGCCAAGGUCGCUGAGUUACAGCCGCCAGCCGGUA  
>P2660  
UGAGGCUCACAGCAGCGCAAAGGUAGCAGAAGUGGCCGGGC  
>P2661  
GCACCACGGACGGCGCCAGCAGCAGGCCCCAGCACGGCC  
>P2662  
UCGGUUGGUUUCUGCAGAAAACGAUGUCCCAGGUGCAGGU  
>P2663  
GGAAGAGACCAGAGAGGUACAGAACUUGAGGAAGAGGCCCA  
>P2664  
GAGAUCCCCGCGACGGCGGAAGCCCGGAGUCCGCGCGGCC  
>P2665  
CGUCAUAGCCUUGUCCUUCAGCCACACGAGGAUGCACGAG  
>P2666  
UGACCUGAUGGAGUACGAAAGGUAUGGCCGAGUCUCCCA  
>P2667  
ACAGUGGGGACUCCCGGCCGAGGAUGUACACCUGGCCCUUG  
>P2668  
GCGACGGCGGGGGCGGU AUGGCGGAGCUGGUGCAGGG  
>P2669  
UACACAAUGGCCUGGGCAGAUUAUACAGACAGCAGGUCGC  
>P2670  
CCGGGGGGCGCGCGGGCCGAGCCGGGCCUGAGCCGGGCC  
>P2671  
CUGUGCUGCCAAACUCAAGCAGCUGGACCAGAAGUGUAAGC  
>P2672  
UCAUUCGGAUGACUACGUGCACAUUUCACUCCCCAGGCCA  
>P2673  
GGGGCCCGCCGUCCCCGUGGAGCUGAGGGGGAGCGACGCA  
>P2674  
GCGAAAGGAGCUGCGGGCGAAGAGAAGGCCAGGAAGGCUG  
>P2675  
GGCCAAGAAGAUCUGCUCUCCAUUCGGCCCCGGAACAGCAGG  
>P2676  
CCAGGUGGAAGAAAGUUUCCAGCUAGGUCUGGCCCGUUGG

>P2677  
UGAAAGUGCCUCCUGCGAUUAACCAGUUCACCCAGGCCUG  
>P2678  
ACCCGGCGCUCACCCGUCCCAGCCCCGCCGCCGCAGCCCC  
>P2679  
UGGACAUCCUCCGGCAGCUCACUCACUUUCUGUCACAGCAG  
>P2680  
CAACGAGGACAUGCCGGUGGAGAGGAUCCUGGAGGCUGAGC  
>P2681  
GCGAUCUCCAAAGGCCCGGAUGUCGCUUACAGAGUCACCA  
>P2682  
CUUGUCCCAUAUUCAGGGUGAGACGGCUUUCUGGGUUUA  
>P2683  
GGGAGAAGCCUUCACUGUCCAGGGUCAGGACGUGCACGGGA  
>P2684  
AGUACGUGGAGAAGAUGGAGACCAAAUGAAAGGACUGGAG  
>P2685  
GCGGAGCGCGCUGGCCUUCAGCCUCCGGCCCCCGCCCGGC  
>P2686  
CUCAAUGUCCUGUCCACGGAUCAUCACUGUCUGAAUCUA  
>P2687  
GGCCUGCUCGGCCGAGCCGCAGGACGCUUGGAAGCGCGACG  
>P2688  
AGGCAGACGGGGAGCCCAGCACCGGGAGGACCGACUCUCGC  
>P2689  
GCCCCUUCACCUGCAGGGCGACCCCAGCCGGCGACGCGUGA  
>P2690  
GAGGUUCGACCCCGACGGGGACGCCGCUCGGGGAGAGGGGU  
>P2691  
CGGGGUGGGGGCAGGCUCCGACCUGGGGGCGUCCUGGCCGCG  
>P2692  
GGAUGACAUCGUGAAGGUUGAGUCUGGGAUGUAGUAGACA  
>P2693  
UCCUCUGUGCCCCUGUACCACCCUCAGAGGCCUGCCCC  
>P2694  
GAAGAAGAAGAAAAAGGCAAGAGGUACUGGCUACUCCCC  
>P2695  
GUUUCUCAGGGAUGUGACUGAGGCCAGGAGGGACCUGUGA  
>P2696  
AUGAGGAGUUGUGCGGCCCCAGGAACACCCCGAGGCCAGC  
>P2697  
UGCUCUGCGAAGGGGAGGAAGCGGGGAGGGGGACCGCGG  
>P2698  
CGUGUAGGCCGGCAGGUCGACACAAACAGGAUGAUGACAC  
>P2699  
GUCACCUUCCAGUACCACAACUACACCCAGCCCCGUGGCA  
>P2700  
CCGCGGCGCUGAGGCGGCGGAGCGUGGCCCGCCAUGGGCU

>P2701  
GCCCCGCGCCAUCAUCUCCAACCCUGCAGCAGCACCUCU  
>P2702  
GCCCCAGCGCAGCCGGCGGCACCAGGCCGGUGCUCACGGUG  
>P2703  
CAGUCCACCAGCUCGUAGAAACACAGACGAGACCUACUGC  
>P2704  
CCAGGAGGAGGGCGCUGAGGAGCGAGGCCAUGUCCUCGGUG  
>P2705  
GGACGACGAACUCCGGGACC AUCUCCUUGAUCUGCACGAAC  
>P2706  
CGACGGCCAUGGUGCAGAGCAGGCGGCCGCGUCCCCACAG  
>P2707  
CGAACCUCUCCAGCCGGCAGCCUCCGAGUCCGGCCGUG  
>P2708  
CGGCUGGGAGGAGGCGGAGACUACGACGGUCGCGUCUUUU  
>P2709  
UCCGCGCCCCACCAUGCCCAACAUCGUGCUGUUCAGCGGCA  
>P2710  
UGCAUCUUAACAAGUUA AACAGCUAAAAGAAGUAAAAUAAG  
>P2711  
UCAGUUGCUCAGCAAAGUCC AACUCCAUGCUCUCCCCUGCU  
>P2712  
CGGCUGCUGCAAGCCCAACC AACUGCUC AAGCCCCGGAACA  
>P2713  
CAGCAGCACCCCAGCUAGGGACAGGGCUCCGCCGCGCCCCC  
>P2714  
CUGUGCGUCCGAGAGGCAAC AAGGUUUGCUGCUGCCUAUUG  
>P2715  
AUGCGCAAGGCAAAGAAGAG AUCGACAGUGUCGGUUUUUCA  
>P2716  
AACCUCACCAAGGUGGUGAG AUCCUGACGCGAAAGAUGCGG  
>P2717  
AAGGAGCCAACAAAUGCAC AAGUGUAAAUUCUGUGAAUAC  
>P2718  
CGGGACCAUGGCACCUGUGC ACGGCGACGACUGUGAGAUAG  
>P2719  
GGCUCCAGGUCCACCUCUUC AACUCCAUGGGCUCAUCAA  
>P2720  
UCCUGUUCGUGGCCGAGACA ACGGCGGCGCUCAGCCUGAGC  
>P2721  
UCAUUGGCGCCGUGAACAAC AUGGACCAGACGGUGAUGGUG  
>P2722  
CCAGAGCGCUGAGCCCCCAAGCCUCAGUUGAGCCGGCCC  
>P2723  
CAUCCUGAAGAGUACCGAG AACUCGGAGUCUCCGCUGCU  
>P2724  
UCCUCGCACCUGCCCCUUA AUCCCUCCUCGCCCCCGCCC

>P2725  
UCCUCCCCUUGCUCGGUCCGAUAGUCCUGGUCCCGAUAGUC  
>P2726  
GCAGAGACUUCGAGCAGCCUACUCGGGACGGGCUGGGCAGU  
>P2727  
ACAAGGGGCCAGCCUAGAGGAGCAGACGGGGUCAGCGGAUG  
>P2728  
AUGGGUGGGUUGACAGGCCAUGGGUGGGUGUUUGGGCAGG  
>P2729  
AACUGACCAGCUCAGCGAGGAGCCAUAUAUGUGCAUAUGUGC  
>P2730  
CUCGGGGAGGAAGUCCCCACAUAUCCAAGUCACCAGCAGAGC  
>P2731  
AGGCCAAACUGGAUCGGUCAACAUGGUCUCCCCUCCCCA  
>P2732  
UCGGGUGGACUACGAACACAACUGAAGCCCUAGGACUUGU  
>P2733  
AUAGCCCGGAUCGGGGACCACCUCCGGGGCUGCCUCCGGU  
>P2734  
AAUGUGAGCGUCCCGAGCGAAGGGAUCUAGUUCGUCCCUU  
>P2735  
GGGGCAAGCCUCCUCAACUAUGACCUCAACCGGCCAGGAU  
>P2736  
UCCCCAAUCUAGCGGAGGUAAGAAGAAAGGCAAAAUGAAG  
>P2737  
GGGACCGGGCCGAGGCCGACCGGCCUGGCAGGGCUCGCC  
>P2738  
UGGCUCUUGGUCCUAGGUUCAGGCUGGGGAAGACUCUUGU  
>P2739  
GUGCCUUCGGUCGUCAGAGCACCCACGCGUCAGCUUCCGC  
>P2740  
AAGUGAAGAUGUCUGGGAAGAGGGGAAGAUUCGGACGACU  
>P2741  
UGGCCAGAUGCUGAUUCUUCAGGUCUUGUAGCUGAGCCAUG  
>P2742  
AACACAUGGUCACGACGGACAUGCACAGCCAUGUCUUCUUU  
>P2743  
AAGAAAGGCGAGAGAAGCGCAGGAAACAACUGGCUGAGGAA  
>P2744  
GUUUACAGAUUCGUGUGGAGAUUGGCUUCGGGGUGUGCAC  
>P2745  
CUGGCUCCCAAGAGGUUGACAGUGACCUGGAGGAGGAGGAC  
>P2746  
GGGAUUCGGAGACCCUGCAAGGGGUGGCAAAUCAGGAACC  
>P2747  
ACCAGGAAGGCGGAGGACGCAGGAGCCAAGAGCAAGGGACG  
>P2748  
CACCGCCAGCAGGGAGGCGAGGGCUAGCGAGCCAAGCGGU

>P2749  
AGCCUCGGCUGCCACGGCUGAGAGCGCCGCCACCGCAGCUG  
>P2750  
AGAAAUGAUGACCAAGAGGAGGAAGAGGAGGAUGAAGAUG  
>P2751  
UCUGUGAUGUCAUCAACAACAUGUUCUUAUCUUCUCUUG  
>P2752  
CUUUCGGUACCACGCACUCCACACGAGAUGCAUCCCCUGGG  
>P2753  
CAGUGCUGAGCACGCAGUACACACGGCUUGGAUUCGGCUGG  
>P2754  
UCCCUAGUGCUAUGCUGGAAUGAGAAGAAGAAGCGUGAA  
>P2755  
CGGGUUCAGUCGCCACUUCUACUUCGUCCAGUAACUGUCUA  
>P2756  
UAGGGGAGCAGCCAGAGAAGAGCUGGUGUUGCUGGCCAGA  
>P2757  
UCUCGGCCGCCGUCCUCUCAACCACCGCCCCCUUUCGGC  
>P2758  
CCAAAACUCACCCUCUACCGACUGGUAUCUCCUCGGAGUAA  
>P2759  
GAGCCACCGUGCCCAACCUCACUUGCUCUUAUCCUACAC  
>P2760  
CCAAGAUGCCGCCCAAAGGAAAAGUGGUUCUGGAAAAGCG  
>P2761  
UUUCCUUGCCUAACGCAGCCAUUGGUAAGCCGUUAGUUAGC  
>P2762  
CCAGUAUGGUGCAUUCUUGAUUGAAGCAUAUGCACUGCAU  
>P2763  
CACCACGCGCCAGCGCUAGCACUGGCUUCCCGCGGUCUAGA  
>P2764  
CGCUCUCAAGCCCGCCUCCAUGAGUAGCUGGUUGAGACCC  
>P2765  
UUAAGAUGAUAAACUGAGAACAGAAACACAAAUGCUCUU  
>P2766  
GCCUUGCCAUUGUUUGCUGAUGCUUCGAACUACAGGAAA  
>P2767  
UAGAAAGCGACAUUUUGGAAUACAGCUGGGGAGAGAGGUC  
>P2768  
UGGAGUAGAGGAGGCAGAGGAGAGGAGGCAGGGGACGAGG  
>P2769  
AGUUGAGGAGAGGUGGGGUUCAGGGCACAGGUGACAGGGC  
>P2770  
CUUCCAUCGCACGGGCCUCCAUUGCACGGGCCUCUAAUCCU  
>P2771  
CUCGGGGAGUACCCCUCCUACUUGCUGGGGGAACCUUCU  
>P2772  
CUGCGGGUCCACUGCACCCAACCCGCCGCGGAGGAAGAGG

>P2773  
UGAGCCCAACUGCAGAUCUAAGAGAAUGCUGGCUAUUAAAA  
>P2774  
ACUUGGGCGGCCAGUGCAGCAGGAUCUCCCCUCCCCCA  
>P2775  
CGCACCCUCUGCUCGCCCCGACCACUUCACCCUGUCCUGGC  
>P2776  
UUCUCCCCGGACUCUCCGUC AUGGGCGUGUGCUUGUUGAUU  
>P2777  
ACGUUUAAGAAGGGGCAGAAUCGCUGGGGAGUGCGGCUUC  
>P2778  
GCGACGGCGGGGUACAACAACAGCUGCAACACCAGGGAAA  
>P2779  
GGUCCGGCAGAUCCCCUCACACGAGGAAGGCCGGCACUGAC  
>P2780  
AGAACCGGAGUGGGGACGGGAGCGAGAACCAAGGUCGGAGC  
>P2781  
AGCAGCUCAGUCCUGCAGUGAGAGUCUUGGGAGUCCAUAGC  
>P2782  
AGACCAUUGAACCCGAGAGAGGAAGAGGAGGCACCGCGGC  
>P2783  
GACCUGAUGCUGCCUCCACAUAGUGCCAGAGCCCAAGGC  
>P2784  
AUCGCCAUCCACCGCAUCUCACCAACAGACUGUGGCUCCUA  
>P2785  
AGAACCACGAACCUGCGCUAUGGAGGCCUCUCUAGGAGGG  
>P2786  
GCUCAAGAGGAAGCUGACAAACGCAAGAAAGAACACGAGAG  
>P2787  
CAGCAGGUAACUGGAGCGCUAUUCCUGGAACAAAGACAAGC  
>P2788  
CCGCGCCCUGAGCAUCGAGAACAGCCAGCUCAUGGAACAGC  
>P2789  
GCUCGAGACAGGCAGCCUAGACCAAGAACCGGAAGGAGGAA  
>P2790  
CAUGCAGAGAAGAACAUAAGAGAAAAACCCAGAGGUCCCU  
>P2791  
CAAGACGGGCGCUCCUCUCCAUACUUCCUCAGUGGUGAC  
>P2792  
CCCCGGAGGAGCACUGAAGGAGAAGAUCUGUAAGUAAGCCU  
>P2793  
AAGCUGGGCUCACCUUCUUGAGCUGGUCAUUCUCCUCCAUG  
>P2794  
AGGAGGAGAAGGUGGAGAGGAGAGACGCCCCUCUGCCCG  
>P2795  
CCGCAGCCAGGUAGUGACGGAGGCCACUUGGAUGUUGUGUG  
>P2796  
UCCCGGCGGCACCGCGCAGCACAGCCAGCCGGGCUCGGUUC



>P2797  
CGUGGUGCUGGGUGCCAUCGAGAACAAGGUGGAGAGCAAAG  
>P2798  
CACAGGGGGGUUGGAGCACACCCUCUGUGUUGGGAAAGGA  
>P2799  
CACUCUGCCUGCCUAUGCCCACAGAGCCUAGAACAGCAGGG  
>P2800  
CCGGGUCCUCCACGUACACCAGCACCUCUCCUGGCCAGCA  
>P2801  
GGUUGGCGAUGCUCUUGCUCACGCACUUCAGGUGCUCGUUG  
>P2802  
CAGUGAUUGUGGCCGCCCCAGCCCCUGCUGCCCCAGCCUG  
>P2803  
GGGUGCCUGGAGUCCCGGUGACACCACGGGGCACACUGAGG  
>P2804  
GGCCCGGGACCCUACCUGCAGGCUGCACUCGCGGCCUGC  
>P2805  
GACCGAGCCACGUCUCCCCACGGCCAGAGAAAUCUCCGGC  
>P2806  
GGACAUCAGGGGGCUCGAGAUUGUUGCUGGUGACAAGGAAU  
>P2807  
ACCCAGGUGGAGGGCAUUC AUGUGGCUGUUGAGGCGCUGG  
>P2808  
CCUUCUGGACAAGCAUGGGAAGCCACAGACAGCACACCUG  
>P2809  
UGAUCAAGAAGGAAAAGAAGAGAGUAAGAAGGACAAGAAG  
>P2810  
AGGAAAGCGUCAGACUCGAGAUGAACCGCCUGCACCGCCUG  
>P2811  
CCGGGCCCGUUGGCGGCGUCACUGACGCUUCGCUCCGGUCC  
>P2812  
UCUCUUGCCUGCUGCCUGUGACCCUGAAGAACAGAAUUGAU  
>P2813  
AGUCCUUGACGCACUCCUCGAAUCCACGGUCAUGGCUGCG  
>P2814  
GUGGGCUGAUGGUACCACCAUGUGUACCGUGUGGGCCACA  
>P2815  
CCUCGUGUUCAGUGCGGCCACGGCGCAUGCGCCCCUGCG  
>P2816  
CUCAUCCUCCUGUGUCACGCACCCCGAGGGCGCAGGAGGC  
>P2817  
AGAAGGAGGGCUUCCCGAUCACGUCCCUGAGGGAGAUAAC  
>P2818  
CCCUUGAGGAGGGGGAGCUGAGAGAUCACUGCAUGGAGAUC  
>P2819  
GCCGCGCGGGACUGGACCGAGCCUCGCCGGCGCGCACCUG  
>P2820  
CACCGGAGUCCAAAGUUGGCAGCCAACAACAACAACAA

>P2821  
UCUCCCUCACGGCCGCGGGAAGGAGGACGGCGGGGCACGGG  
>P2822  
GUUUAACCAGGCUUUUCAGGAUGGGACUUCAGACCAAGGAC  
>P2823  
CCGGCUCUCUCCUUCUCCGAGCCUCGGCACGGCCCUUGC  
>P2824  
GCUGCGGAGCUGCCAGCCGACCUGGCGCGCUGCGCCCCGC  
>P2825  
GAGUGUGAGCACCGCAGCCAAGCACCGCGCGCCCCGGCCAA  
>P2826  
GCGGCAGUGCCACCAGCAGGAGGCGGUGUGGGAGCUGCUGC  
>P2827  
UUCUGUGCAUAGGUUGUGGAAGGAGGAGAACCCUUGCUGA  
>P2828  
GCCUCUUCUGAAGAGCUGAAAGCUGCCUACCGGAGGCUCUG  
>P2829  
GCGCGAUGUCCGGGCCCCUGAGCCCGCGGCUGAGCCAGC  
>P2830  
GAGUGCCAGGCGGGUAGGGGAGCGAGCCAGGUGGGGACCG  
>P2831  
GAGAGAAAAGAGACAAAGCAAGAGAGAGUGAGAAUUCAAGG  
>P2832  
GCAGGGCCCGUCACUCCGACAAGUGCGCGUGUCACGCGGCC  
>P2833  
CGGGGCCAGACAGAAUCCUAAUGAGGGCUGCCAGGAGACC  
>P2834  
UGUGAGGUCACGGUGGAGGGAGAGGAGCUGAACCACGAGCA  
>P2835  
UCGAAACCCGGAACUUCAGAACCUCUACUGGACGACUUCU  
>P2836  
GGUGCAAGGCGAGGAGGAGAAGAGGGAGGACAAGGAGGACG  
>P2837  
AGCACCGCCUCUCCAGCUUCAGCCAGCGCGCUCAGCGGGCG  
>P2838  
GCAGCCAGCCAGCAGGGCCAGUAGCAGCAGGGGCCGCAUG  
>P2839  
GCUUCUCCAGAGCUUUCUUCAGCAGCCGGACCUUCUGCCCU  
>P2840  
UGGCUGAAGUCCAAAAGACAAGAAAGAUUCUGAGUUCUCUUC  
>P2841  
CAUCCUGGGCCUCUCUCAGCAGGUGUCACUUGCCCCUGGGC  
>P2842  
AACAAAUCCAAGACAUACAACUGAAGACAAGUGAGCCAGA  
>P2843  
CCACUCUCAAUGCCACCGCACAGUCCCCACUCCAAUUCU  
>P2844  
GGCGGCGGCGGGGGCACCCGACGAGGCGGCCGAGGCGCUGG

>P2845  
CCCCAGCACGGGGAGAGGGCAGGGGGUAGCCAUGAGAAACC  
>P2846  
AGAGCCAUGUCCCUGAAUCCACCAAGCUCAAGGUGAGAGU  
>P2847  
UGUGUGCCCUCUCCUCAGGCCAAGUUUGAGCUGAUCACCUCC  
>P2848  
GAGCGAACCCGAGAGCGUGGAGCGGGCUGGGCCAGGUGAGG  
>P2849  
GGGCGGGGUCCAUUGAGUAAAGCCUUGCGUGCCUGCGCCCG  
>P2850  
AGACAGACGGUUGGAAAAAAACUGAAGAUCACACAAAAAG  
>P2851  
ACCAGGCUCUGAGUGAGGACAUACAAAAGGUGACCAAUGAC  
>P2852  
GAGCAGGUGCAGACGUUGCGAGGCGAGGUGGCUGACCUGGA  
>P2853  
CCUCGCGUGUGCCUGACCCAUGUGCACUGCAGCCUGCCUC  
>P2854  
GCUGGGGAGGCAGGCGCCUCAUUAGGUCCAAGGCACAGUCC  
>P2855  
CUCCAGCUCCCGCGCCACGAGUCAGCAGGGUCCUGCCCAG  
>P2856  
UGUGGCUACCUCUGCUCUCCAGGGCUUUGUGGCGGUGCCUC  
>P2857  
UGGGGUGGGGGACGAGCUAGACGGAGAGACAGGGGAAAGA  
>P2858  
AGCAGCGGUACCGCCUCCUCACCCGGCGGGCAGCAGCGG  
>P2859  
CACCUGGGUCCGUGCAGCCCAGCACCUCUGGCCACUCCGGG  
>P2860  
UAGCUGGAACUCGUGCAGGGAUGGGUCGAUCUGCAGCUGCG  
>P2861  
CCCGCACACUCACCGCCAGCAGCCGCCCGUGCAGCAGCAGC  
>P2862  
CUAUCAAAACCUUCUGAGAAUGACUCGGACUCUUCGUGCA  
>P2863  
GAAGCUCCCCAGUCACCAAGAGACGUUCACCUUCAUUAUCA  
>P2864  
UGGAAGAAGAUAAAAGACUAAAUUACCUGCAAUUGGGAA  
>P2865  
CUACUCCUCGCAACUUACUACAGGGCACUAGGGCCAGAGC  
>P2866  
CAUGAGGCGGACAGGCCCCGAGGAGGAGGCCUGCGGCGUGU  
>P2867  
GCCUGAGGAAGAAGUGGGGAAGGAAGAGGAAGAAGAGUCUC  
>P2868  
UCAUGAGGCCCAGCUCAAGAACGGCAGCCUUGACUCCCAG

>P2869  
CGGCCGUUUGGCAGCCCGCGAGGCGGUCCGCGGGAGCACAC  
>P2870  
GUCCAGGCCGAUGGGUUGACAUCAGGCAAGCUCCCAUCUG  
>P2871  
UCCUCCUGUCUCAACCUCCCAGUAGGAUUACAAGCAUGCG  
>P2872  
AGCAGCAGGUAGCACAAGAAAGCGAUACCGCCUUCUGCCG  
>P2873  
UGUGUUCACCUCACUGUAGAAGGUCAUAAAUGCUUCCUCGG  
>P2874  
UUGAGUGCAAGAUGAGUUAGACCGAUUCUUUAGCUUCCUGC  
>P2875  
CCCAAGCGCAUAGCUAAAAGAGGUCCCCCAGCAGAUGC  
>P2876  
AGUCCCUUCCCAAGAGCCUGAAUCCUCACAGCCCCGUCUCG  
>P2877  
GGCCCCUAAGACUGGGAGGUAGGUUGGGAUGUUACAGGCUG  
>P2878  
CUUGGGGGAGGAGGAAGUGGAGGAGGCGGCUAUAUAAUAG  
>P2879  
UGCAUGUGUCUUGAAGAGAAAGCAGUGCUUUGGCAGGACU  
>P2880  
AACCAGGGCGUCGCCUCCAGACUCAGGCAGCCACCCACCC  
>P2881  
AUGGUCUCAGGCCUUCUGAAUUCAUCCUAAUUAUUCUAUG  
>P2882  
CAAAGAAGAAGAAAAGAAGAGAAGCACAAGAAGAAGCAC  
>P2883  
GCCAUGAGCAGUUGAGUGGCACAGCCUGGCACCAGGAGCAG  
>P2884  
GGCGGCGGCGGUCUCCACGAGUCCGUCUUGCUGCUGCUGC  
>P2885  
GCCAAACAUAUCCAUAUCCAAAAGCAGCCAGGACAACCGGA  
>P2886  
UGGGCCAGGCAGGGCUUGGGACUCCGUUUCUUCUUUUUGUC  
>P2887  
GUGUGGGGAGGAGGAGGACGAUGAAGAGGAAGAGGAUGGGG  
>P2888  
GUGGCACGCAGCCGCUGCUGAAGCGGGCCUCCGCCGGCCUG  
>P2889  
UGCCCAGGGAGAGGUGGCAGAGUUGAGGGUGAGAAGAGCG  
>P2890  
GUCCCGCUUCAUAAACUCCAAGGCUUCAGAGGACUGUGGGA  
>P2891  
UUCCCAGCCGAGAACCAGGAUCUUCUCCUGGCCCGCGCG  
>P2892  
UUGAUCGCCUUCUGUUCUUCAGUCAAAUUGUAAUCUCUAAC

>P2893  
UGGAGCCAGGAAAGCCCACAAGCCCAGAGCACGUUGUUUAU  
>P2894  
CACAGGCAGGGGUAGGAGCUACCGGAGAAGGGAGGGGUGC  
>P2895  
UAUUCAUCAAUUUCUCCCCAUCAUACUCAUCUUCGCUUCC  
>P2896  
GAGUCUGAGGAAGAUGGAGAAGAGAAGGUAGAGAAAGAAGA  
>P2897  
UGAGCUCUUCACCCUGACCUAUGGUGCCCUGGUCACCCAGC  
>P2898  
GGUCGCCAGGACCCCCCAGAGCCAAGACCUUCUCCAGAAG  
>P2899  
ACCGGCACGGCUGCAGAGGGAUGAGUGC GGUCGGGUUGCGG  
>P2900  
GGCCCGGAGGCGGGAGGAGCAGGAGGCACGAGAGAAGGCGC  
>P2901  
GAGCUGCCCCCAGAGCAGCAUGGAUGCCCCGGAAGGGAC  
>P2902  
UGAGAGGCUCGCACGCCUCCAGCCCGGCCCGCCCCCGG  
>P2903  
AGCCAACAUGGCGAUGCACAACAAGGCGGCGCCGCGCAG  
>P2904  
CCGCGACUAAGGGAAGAUGGAGACAAUACUGGAGCAGCAGC  
>P2905  
CCCCGCUUGGCCCGGCCCGCAGGUAGGAGCCGCCGAGGGAC  
>P2906  
CCGUAGCCGAAGUCCUUUGGAAACGAAUCGGCCGCGCCGUA  
>P2907  
GCCGCUCUCCGCUUCCGGCAAGAACC GCCCAGCAAUCUCCG  
>P2908  
CGCUUCUCGGGCGCUGCAGCAUCUGGACCCGCCGGCGCCGC  
>P2909  
CCUGAGGGCCUGGUUGCCCCACUGGACCCUCUCGCCUUGG  
>P2910  
GUCAUCUGCGUCCGGCACCCAGGAGGCUCGUGGUCCGCCUU  
>P2911  
UGUUGCUC CCCUGUCUCUGGACGACGCUGUGACUGAUCCA  
>P2912  
UGGGCCGGCGACGCGCGCGGAGCCCCGGACAGCCAGUGAAC  
>P2913  
GCUCGAUCUUAUGCGGCCAACUUCUGCAAUCAGCGGGAG  
>P2914  
UCUUGGUACAAGUUCACAACAGCCUCCAUCUGGCUAAGGA  
>P2915  
AAGAGCUGGCAACGAGGAGGAGUGCCCAGAGGAGGACAUGG  
>P2916  
GCGCGGCACAGAGCCUCGGGAGGCUGAUGCAACUUUCCCUU

>P2917  
GGAGGAAGAGGGCAACAGGCAAGAAGGGCGCGCCGCGCCUCA  
>P2918  
CCAGAGGUGGAGACGGUACUACCUCCCAGCUCUGUUUCCA  
>P2919  
GAGGUCACUUCUGGGAAGCCAGAACAGGAAGUACCAGAUGC  
>P2920  
CAAGAGCCGGAGGUGAACGGAGGCAGUGGGGAUGCUGUCCC  
>P2921  
CGCGGCGAGCCGGGCCGAGCAGUGAGGGCCCUAGCGGGGCC  
>P2922  
ACAGGCUGACAGGAGAGAGAACAGGCACUGCGGGACCUGCA  
>P2923  
UCUGUGCCUCCAGGGGAGGUAGCCGGGGGCUGCUCCGAGC  
>P2924  
GAUUCUCCUUACCCCUCCACAAAUCAAGACUGGACAACUGG  
>P2925  
GGGGCCGCUUCCUAAGGCCACUGGAGGUGGGAUCUCAUCC  
>P2926  
CUCCACCUCCAUGUUCUCCA AAAAGGACUUGACCUGCUCCU  
>P2927  
UCUCUAAUUGGCAGUCUUGGAAGCUUCAUUUUGUAGUUCU  
>P2928  
AGCCAUGGAGAGUGACUUUUAUCUGCGUUACUACGUGGGGC  
>P2929  
AGGGAGGUUUCGAGCCCGGAAGGUCCGGCGCCAGAGCUAA  
>P2930  
GAGGAGGAAACCCUCCGAGAAAACAGCAACAAGCUGAGCU  
>P2931  
GUAGAGGACACUGGCAGGAGAGUAGCUGGAGAUGAGGCAGG  
>P2932  
CUGCUAGGAUUGUGAGGUGGAGGCUGUGCGUGCGGCGAGGG  
>P2933  
CCUGAAAGAAACCUGGCGGGAUGGGGCCUCCCGGCAUCCCA  
>P2934  
AGCUUUAUACGUCUACGAAUAUUUACUGCACGUAGGAGCAC  
>P2935  
CCGCGUUCUCCGCCCCACC AUGGCUCGGGGCCCCGGCCUC  
>P2936  
GUAGUUGGUGUUGGUGCAAGACGGGAGCGAGCGGCGGUCGG  
>P2937  
CGGAGGCGAGGGAGCAGGUUAGAGGGACAAAGAGCUUUGCA  
>P2938  
CGAAAGAAGAAGAGAGGAAAAGAACACCGAAGAUUAACCA  
>P2939  
GUUCAAGAUGUCGACCAAGA AUUCCGAGUCAGUGACGGGG  
>P2940  
GCAACAAGCACCCUGCACCAACAGCAUCAUGUCCAUCCUG

>P2941  
UUCCUGAACUCCGCGCUGCGAUCCAUGGGUGACGGACUCAG  
>P2942  
UGUUGGCUCCCGUCCGGCCACUCGGACAAUAAUACACGGG  
>P2943  
UCCGGCCCUCCUGACGCGACACUGCCCCUCUCCGAGAGCUG  
>P2944  
GAGAACGGAGGAGGAACGAAACGCAGAAUUGAGCAGGAUA  
>P2945  
CAAAGAAGAGAAGAUGAAAAAGGAAAGCAGAAGAAGAAGC  
>P2946  
GAACAAAGAAGAAUUGAAGAACAAAAGUUACUACGCAUGCA  
>P2947  
AUAGUUUCUCCCCUUUUCCAAUGACUAAUCCUGCCUUGCU  
>P2948  
GGCGACGGAAAACGGGGUCCAACCCCCGAAAGCGGCUGCCU  
>P2949  
AUAGAAGAGUGACAGCAGCUAGACUAAAUGUUUAACUGCUG  
>P2950  
GACGAGUCGCAGAACCCCGGAUCCGGCGAAGUCGGCGGGCG  
>P2951  
AAAGAGAGAGCGACAGCGAGAGAACCACCGCAGCGACCCCC  
>P2952  
AAAGUGAAGCCACAUUGCCAACUUGCAGCAGCGAUUGCAG  
>P2953  
GGAUUGACUCUGGGGUUUGCACUCAGUGCGCGCUUUGGCGG  
>P2954  
CUACUUCCCCUCCUCCCCUACUCCCUGUAUAUUUCCUCG  
>P2955  
UGAGGGAGCUGUUUCCUGGAAGACAAUGACUAAGCAGAAAU  
>P2956  
GAACAAAUACAAUGGUGGAUGUCAUCAGUUAAGGUGGGG  
>P2957  
CGCUCUUUGCACCAGUGGAGAAUAGAGAAAUCCCGACUU  
>P2958  
GCAGCGACAAAGCCUCCGCCAGAGCGGGAGAAAGAAGAGAC  
>P2959  
CCCUGGAGCGACCCCGGAGGACUAAGCGGGAACGGGACCAG  
>P2960  
CGAAGUCCCGCAGCCAGCGCAACAUGGUCCCAGAGGCGCAG  
>P2961  
CUGUGCCCCAGCUGGGCAAGAGAGGGCACCCGACGCCGACA  
>P2962  
CCCCAAGGCAGGGGCACCGCAGGAGGCCGGCGGCCCCUG  
>P2963  
AGGAGGGAGGACCGACGCCAACCCAGACCGCCGCGUCGU  
>P2964  
AGGAGGUGCAGAAGGUGGACAGGGUAAAAGAAAGAGACUUU

>P2965  
CCAUCUCCGCCGCUAUUACCACUGAACCCGGACCCCUACC  
>P2966  
UCCUUUAUCCACCCGAAACAUAUCCAGAUCACACCAUCU  
>P2967  
AAUACUUUUUCUCCGAAGGAGAUUAUUUCAAGUGGAAUA  
>P2968  
GGAGUCGUGUUGGUCCUCAGAUCCCCGCGUAGCCGUGCC  
>P2969  
GGAGGACGGCCUGUUUCAUGAGUUCAAACGCUUCGGUGAUG  
>P2970  
GACUGAGGCCUGUGGUGGAGAGGACGUGCCGUGCCGUGG  
>P2971  
GGAGGUGGAGGAGGUGGAGGAGGUGGAGGAGGCGCCGACC  
>P2972  
CAGCUGCCAACUCUUCUUCAGUUUACUCACCCGGCUCUUC  
>P2973  
GGUGCCGUGGCACCCGGGAGACGUGGGGGCCGGCGCUG  
>P2974  
AUGCAUAUGUGGGGCCGGAUAGAAUUGUGGCAGGCGGCGCU  
>P2975  
CAACACCACCGUCUCCAACCACCACCAGUUUGUACUCAGUC  
>P2976  
AGAUCUGACAGACGCCAAGACGUCUGGAGAGGCUACGG  
>P2977  
GUCGGGCCGGCCUCUGCGCGAGUGCCCAGCCACAAGCAGCC  
>P2978  
CUUUAUUCGGGCCAUCGCGGACGCCGGUCUUAAGAAAGCAG  
>P2979  
GCUCCUGCUGGGGCCUGCCCACGCCAAGGACCUGCCUCUGU  
>P2980  
GGAGAGAGUGGGGCUCCUCUAUCGGGACCCCUCCCAUGU  
>P2981  
GCACGCUUUCAGCUUUCGUAUAUUAUCAGUAAAAAUGAAA  
>P2982  
CAAAGCGUUGAUUUCUUGGCACCCCGCGGGGCGGGCAACUG  
>P2983  
GAGGGGGGUGGGGUGGAAAUAGCGGCUGCUUCUUUCCAAG  
>P2984  
CAUCUUCACAAACUACAGGGAUCCAACACUGGCCCGGAAGG  
>P2985  
UGGGGAGGGGUGCCGAUAGAGGAGCCCCACUCUCUCCUCC  
>P2986  
GGAGGAUGAGGAGAAAGAAGAGAAGAAGAGAAGGAAGAGG  
>P2987  
UGGUGCCCACACCAGGCUGCAGCCGUCGCGUCGCAUAGUC  
>P2988  
GGCAGCCCGCAGUGCUGCGAGAGGCCGUGGAGGCCGUGGU



>P2989  
GACAGACAGAAGAAAAGACAAGAAGCAGCUGCCAAGAGAAG  
>P2990  
GCCAUUUUCACAAGCACAUGAAGAUGAUACUUUAAAUGGC  
>P2991  
CGUCCAGAGUCCUGGCCUGAGCGGGAAUCGCAGUGGCCGA  
>P2992  
UUUUGGAAAUGUACUGCUUCACAGCAAAAACCACGUUCAUG  
>P2993  
UCGCGCCUCCCGCUCCCGGACUCUCCCUUCUUUGUAGCU  
>P2994  
UCUUCGAGGGGAGAAGAGGAACGAGAUGCUGAAGACGAUG  
>P2995  
AACGUUACACCGGAACCGGAACCUUCUGACCGCCUACGG  
>P2996  
CAUGGAUAGAGAAGACAGUGAAGAGGGUCCUGGGUUUCUA  
>P2997  
UGGAGAGAGCGCCUGGGCGCAGAAGGGUUAACGGGCCACCG  
>P2998  
AGCUAGCCCGGAAGCCCACACUGGCGGCCACGGAGCAGAG  
>P2999  
ACAGGGAGUCUUAACUAGAGAAGGAAACGGGACUAAACUGG  
>P3000  
GAGUGUUGAGGAUUAUUUCUAGAGUUCAAGGUCAGAGGUC  
>P3001  
UUCUGGGACUCACAGUCGUGAUGUCUUUCAAGAGGGAAGGA  
>P3002  
AUCAGCGCCUCAUCCUCUGGAUGUAACUGGCUAGGAGGUC  
>P3003  
ACUUCUUGUAAGCCUCACGAUGAUCUUGAAGGCUCGAGCA  
>P3004  
CUGGGGGCCGGGCACCCCGGAGACCGCUGGGAACCGGCUU  
>P3005  
CCAUAGUGCUUCCAACACCUCUUGCCACCUUCCUCCUC  
>P3006  
GCUGCUGACUUGAGAGGGUAGAAUCCUUUCCCACUUCC  
>P3007  
GAAGUAAUGGAAUAAUUUCUAAUUUCGGAGAAGGCAAGUG  
>P3008  
CAGGCUGACUCUCCAGGGUGAACUGACAGGAGAUGAACUUG  
>P3009  
GAACUAAGCUUACCUAAUGAUCUCCUCAUGUCCAUCAUGG  
>P3010  
CAAGCCUGUCCACCAUUCAGAAAUAAGCCUGGGCCUUGGG  
>P3011  
GCCUCAACCUGAUCCACCAACCCUGGCCUCUUGCCAUUC  
>P3012  
GGUUACCCAGCAGUUGCCCCAUCUGCUCUAGGUAGGCAGAA

>P3013  
CCAGGACCCUUGUCACCGGGAGACAGGAGCGGGGAGGAUCU  
>P3014  
GGCGGUUGGUUAGAUGCGUAAGCGGUAGUAUGCGAGCUCAG  
>P3015  
GAGAGGACCCGAGUGUGAACAACUGGGAGUGUGCGUGCGUG  
>P3016  
CUUCCAAUCCGCGCAAUUUAGUGAGAAGAUUGCGCUGCAG  
>P3017  
GCAGUAGCUGGGUGGGCACC AUGGCUGGGAUCACCACCAUC  
>P3018  
UCCCGGCCCGCCGGCCCCGGAGCGGAGCGGAGCGGAGGAUG  
>P3019  
GGCCUUUGAGGCAUUGGCAGAGACCCAGGGUCCUGGCCCC  
>P3020  
CCUCAGGGACCUCAGCAACUAUGGCCUCCUGCCCAGACUCU  
>P3021  
GAGUCACAGAAGUCCUGGGGAGGGAGAGGGACAAGUGGCUU  
>P3022  
GGUGCCCGGAGUCUUAAGACACCGCCAGUCUCUGGCGCCUU  
>P3023  
CGUAAAUGAGCGAGUCCAGAAGCCGCCCGCCUCCAUAACG  
>P3024  
CCUGGUACAGGGUGGAGGAGAUUCUUGUUGAUGUAGUACAGA  
>P3025  
CGACCCGAGCCCCGGAGUGAAUCUCGCACACUUCCCAGCA  
>P3026  
GACUUUAGGGCUCCAUUCUCAUUUUCUGCGGGGCCCCCAGG  
>P3027  
AUCCUGGGGAAGCAGAGAGGACGAGGCAGGCCGGCUGAACG  
>P3028  
AACUCCAAGCCUUUUACUCAAGCUGUCUCCCCAUUCCCU  
>P3029  
GCAGCAUGCCUACGGUCCUAACCCUGGGCUUUUGCACCCA  
>P3030  
GAGAGAGGGCAGAGAAGAGGAGGGGUGUCUAGGGGGACUGG  
>P3031  
GAGGUGGGGGCCUCUCUGGAAGCACAUUUGGAGGGAAAGAC  
>P3032  
GGUGGCACCAUGAAGAGGAGAGAUGGGGGGUCUUGGAGGAA  
>P3033  
AGCCCUCCUGGGAUGGCUGGAGUGGAAAUGAGGAUGAGGC  
>P3034  
GGGCUCAUCCCAUAGCGGUAUGGGGGGGCAGAGUGACCUU  
>P3035  
CCCGGCAGAAACUCAUGGCUACGGCUGAUUUCCACCGAACA  
>P3036  
CCACGUGGUGCUGGGCGAGGACAGCGCCCACGCGCGGCUGC

>P3037  
CUGGUCGCCCUCUUUAUUUUUCUCCUCUCAAGCUG  
>P3038  
GAGAGCGGCGCACUGACUCAAGGCAAGGGCUGCAGCUGCAA  
>P3039  
CACCCUUCGGCCCCCAGAACCCGCGCCAUCCCCGGAGC  
>P3040  
GCUCAAGUCGGCCUGCAAGGAGACAUCCCAGCGAAAAGA  
>P3041  
UCAUUAAGAUGUCCAGCAAAGGGAGCAGCACAGAUGGCAG  
>P3042  
CGGUCGGGGCAGUUACAAGCACGGGAAUCGGCGAGGCUCAG  
>P3043  
CGGUGGCGACGUCCAGCCUGAGAACCUCAAGAGAGGGAGGU  
>P3044  
GCACCUCAGAACUCAGGCGUACUGCCCGCCGCCCAGCCCU  
>P3045  
UCUCUGGCCUCUCCUCUGUAGGACUCUGUCUGGGCCGCUU  
>P3046  
GUGACUCCAUGGUGCCGGCAACCCAGCCGGCUCCCCCAUU  
>P3047  
AUCUCCUGACCUCGUGAUCCACCCGCCUCGGCCUCCCAAAG  
>P3048  
UGACUGAAUGUAGCUUCAGGAGAUCAGGCCAUAGAACGCU  
>P3049  
GUCCCGCGCUCGCUCCGAAUAUAUACCUCAUCCGGGGGGC  
>P3050  
GCGAGAGGACGGAGGAAGGAAGCCUGCAGACAGACGCCUUC  
>P3051  
AUUGAGAGGGUAGGCUGUGGACUCCAUCUCUGCAAGCAAGA  
>P3052  
UGGUUCUCCUCCUGGCAACUCACUCUCGAUUUCCACA  
>P3053  
UCCAUCACACAGACACUUUCAGAUUCUCCCGCAGGCUCCG  
>P3054  
CUGCGGGUCCUGCCUCAGCCAUGAUGAUCCACGGCUUCCAG  
>P3055  
CUGGUGGGGACUGGGCCGCAUGGACAAGCUGAAGAAGGUG  
>P3056  
CCUUACAGGGAGAAGGCGUCACUCGCGGUACAAGUGCCUG  
>P3057  
GCCCUUCCGGCCACCCUUUAACCCAGCUUCCCUCCCC  
>P3058  
CAAGAAAAGAAAAGAACUAGAACGGCAGAAAGAAAAGGA  
>P3059  
AUGAUGGGGCUAUCGGGAUAUAGUGAACAUCAUCAGU  
>P3060  
UUCUGCUGGCUCUCUGUGACCGCUUCCGGCUCUGCCCU

>P3061  
GUAAAACUGUUAGUAUCAGGAGAGCCCUUCGAGUAUUCUCU  
>P3062  
GCUUCACCAUUAACACAAUGAUGAGAGGUAACAGGAACGCC  
>P3063  
CUAGAAAACAUUGGAAAGUUAGAGAGUUCGAGGGAAGAAU  
>P3064  
CACUGCCUGCGCUCUUGUCC AUGGGUCUGCAGUCGUGUUGA  
>P3065  
CAUAGCACUCAUUCUAUUUCACACAUCAUUUUUAACAAUGC  
>P3066  
UUCAGGUUGCCGAGGAGCCCAGUAGAAGAAAUAUGGAGUU  
>P3067  
UGGUGCGGGGGCAGCUGAGAGCGAGAGGUGGAUCGGGGCG  
>P3068  
CCUCCCACCCACCCACCAGAGCCUUUCUGUGACAGCAGCG  
>P3069  
ACGCCUCCCCAGUGCCGAAACUUCGCCCUCCGCAGGGUC  
>P3070  
GCCUGGAGCCUGGAAGGGGGAGACGGCCCGAGCGGGAGCGG  
>P3071  
CUGCCUCAUUCACUGACCCC AUUUCUACAGAACUCCUAAA  
>P3072  
UCUCCAGCACGCCUCCUUGAGCACGGUAGCCGUCGCCGCC  
>P3073  
GGGCGCUUAGUCCACCCCCAGAGGAGGCGGAAGAGGAGCC  
>P3074  
GGCGCGAAUUCGGCGGGCAGAGCAGCUUCGGCGCUGGCGGG  
>P3075  
AGCUGUUAGGGGUAGACCUAGCCAAGGAGAAGUGGGAGAC  
>P3076  
GGCAGCGGCCAAGCAAGAAGAAAGACGUGGCAGCAAGCGGG  
>P3077  
GCAGAGAGAGAGACAGAAAGAGAGAGAGAGAGAGAGA  
>P3078  
GAUGGGACCGCUGCUGCCGAACCCCGAGCUGCUGGCUUCUC  
>P3079  
UCGCGCCCUGCGCCCCACCCAGGUUGCGGCCCGCCGGGGAG  
>P3080  
GGUGGCCUGGGGAAGAGAGCACAGAAGCCAGGGAAUGUCA  
>P3081  
GACCUGGCUGGUGACCUUGUAGUCAUCGAUGAUGGCGUUCU  
>P3082  
AACUGGUCUUAACUGACUCCAAAGCUGAGAGCUCCAAAGUC  
>P3083  
GGCCAUGAACUCCGCGCCAAGACCCAGACCUCGUUGGCC  
>P3084  
CUCUGGGCUCCAGCCCGCCAGCCGCGCCAGAACUGUACU

>P3085  
AAGAAGAACUCAGUGGAGAGAAAAUAGGCUAGCUGGAGAG  
>P3086  
GAAAUGAAAUGAUGGAGAUAUCAAGUGUUGGGACUAAUUAU  
>P3087  
GGUCGGUUCUGCAGCGCUGUAUCGUGUCGCCGGCAGGGAGG  
>P3088  
CGAACCAUCUCCUUGAACAGCCACUCUAUUGUAAAGGAC  
>P3089  
AGACCUGGCUCCUGGACAGCAAACUUCUCUCUCCAAUGUC  
>P3090  
CCCCGUCCCCUCCCGCCCUACCCCAGCAAGGCCGGGUUCU  
>P3091  
GCCGGGCGGCGGCGCGCCGAAGGCAUCCACUGAGGAAACA  
>P3092  
CCGCCUCCCGGUCCUUCGCCAGCUUGGCCGCGAUGCCCGCC  
>P3093  
ACGCCGGCGAGCGCCAGACUAGGGUGAAUGGGAAGGACCGC  
>P3094  
GGGAGGGGGCGGAGAGGCCGAGGCGCGGAGCUGGUCCCCAG  
>P3095  
GGUGAGCGUGGGCUCCAGCAUGGGCAGGGGACGGAGGCAA  
>P3096  
CUGCAGCUGAAGCCCGAGGCAGGGUUGGUGUGAUGCCAAGG  
>P3097  
UCUGGGAGGCAUAAUUUAGAAGACUCAUGUGCUGAGCUGGG  
>P3098  
CAGCGAUGACGACGAGGAGGAGAAGGUAGAACCCUUGGUC  
>P3099  
UCUAUCUUUGCCUUGUAGGAAGGAGGAAGAGGAGCGAAGGC  
>P3100  
CUCCAACGUCUCUGCGGCCACACCGGCCCGCGCCCCUCGC  
>P3101  
UGCUGGGGCUGGGGAGCGCAAGGUGCGGGCGGGUUUCCAGG  
>P3102  
GGCGCCGGCGAGGAAGCGGAGGAGGCAGGCGCGGAGGAGG  
>P3103  
GUACUUGGCGCUCGCCACAACCGCGUCUCCUCCUUGAAC  
>P3104  
UUGUCCACCCUCAGAGCCCAAGAUGAUGUUUGCAAAGGAGC  
>P3105  
GAAGCUGAGUCCAGCUCGAAGUGCGCGUGGAGGCCGUGG  
>P3106  
GCGGCUCUCCUCCAUUCUGCAUGUGGCUGGUGGGUGCCAGG  
>P3107  
GCCCCUGGCCACCAUCUGGAGCGCUUGCCCACCCGAAGC  
>P3108  
UUCGAUGCACCUGUACUGGCAGGAGGCCGAGGCAGCAGUAG

>P3109  
CCGCGCCUCAAAACCCCCUGACUCCAGCUGCCGACGCAGGC  
>P3110  
GAUGAUGACAACAAUGAGGAAGAGGAGUUUGAGUGCUAUCC  
>P3111  
CUUUGCCCGGAGGGAGCUGCAGAGGGUCCAUCGCCGCCGUC  
>P3112  
GUGGUGAAAUAGUGGGAAGGAUUCAUGUAGGCAUCGGGAAG  
>P3113  
CAAUGCCGAGAAAGCAAUGAAGAGCGUUUCGAAGCAUGCCA  
>P3114  
CUGAGCCGGGCACUAAGCGUACAGCCCGGCCCGCGGCAGCC  
>P3115  
GAAUGUCCUAACGCUCCGCAGUGGCCGCACGGGGCCGGGC  
>P3116  
CUGAAGGUGGAAAAGUUCGCACCCGCAAGAGGGGAAACGG  
>P3117  
GGCGGGCUGGGAGGAUGAGGACGGCUGCCCUGGACUCCGC  
>P3118  
CAGAGGAAUAUGCUCCAACAAAUUUCGGAUAGAGGCGCCGA  
>P3119  
AACAGGUCAUGGCACGUUUAACAAAAGACGACAGGCGGAU  
>P3120  
AAUUUGUAGAAGAAUCAAGAAGCUGGCAACACAGCACAAG  
>P3121  
GGCACAUAACAACUUCAAGAAAUUACGGUGGUGCCGUCCG  
>P3122  
ACCGAGUCAGCGCUGUAGCGACGCUAUGCAGAGGCACACGG  
>P3123  
GCCGGGCGGCACUCCGCGGAACCCGCCAGCGGCAGGAGGC  
>P3124  
CUGGAAAGACAAAAGGAAUAGAAGAAAGGGAAAAGUAAGG  
>P3125  
CGUCGGUGACCGUCCACUCCACGGGUUGCUCUCCAGAACC  
>P3126  
CCCCGCCGCCAGACCUUAGCAGGGUCCCCGAUUCAUCCUCU  
>P3127  
AAGAAAGAUAAAGAUAAAGAGAGAGAAAGAAAAAGUGAAAGA  
>P3128  
CAAAAGACGAUAUCAAGCUCACUGCCAAGAAGGAGGUCAGC  
>P3129  
AAAAAGAGCUUUAGUCUCGAAGAGGAAUUACCGAAGUGUC  
>P3130  
GAGAACUGGCAGUGAAGCACAUUCUCCUUCUUAUCCUCCA  
>P3131  
GCCCGCGGCCCGUUUCGGGAGGAGGCGGAGGGCGCAAAGC  
>P3132  
CCUCCUCAUUGUCCCCGUCUAUCCCGCACGUGUCCUGGUCG

>P3133  
UCCGGGGCCUGACCCUCGGAACUGCGCCUCGGCGGGCGGUG  
>P3134  
AGAUGUUACUAGAGGAGGAGAUCCCGUCUGGCAAGAGGGCG  
>P3135  
UCUUACUAAAAUCUUCUUC AUGGCCAGGCGACCGGGCUU  
>P3136  
CUGAGGAGGGCGUGAAUAGGAUCGCAGUGCCAAAACCGCCC  
>P3137  
GAAUUCUCUAAUGUUAGAAGAGGAAGAGGUGUGGAUUACCU  
>P3138  
CCGGGCAUCGGUGGCCGCGGAGCCGCUCUCCCACCCUGGGG  
>P3139  
GCCUCUCAGCCCUUCAGCAGAGUGAGCUGCUGCGCAUGCGC  
>P3140  
GGAGUAGGAGAGGCUGGGAGAGCGGGAGGAGAGUCUGCGGG  
>P3141  
AUGAAUGGAAACCAAGAGAAAGGUGAUAAGACUGAUAGAAA  
>P3142  
GUUGGAAAUAUCCUCCCUGAGAGAGCCGUGCGGCUCAGGGGA  
>P3143  
CCUCGCCGCCUCCGGAGGCGAGGGAUUGUUUCCACAAGGG  
>P3144  
GGAGAUGGGCAGCAUUGUUGAGAGAUUGGUAACACUGAGCA  
>P3145  
UCCGUCGUUUGAUGCCCUUAACAGCCAUUACUGAUCAGUC  
>P3146  
CUUCCUUAACUUCUUCUCUAUAUCUUCAUUCUAAAUUUC  
>P3147  
UUGUUCUCAACCUGCAACAGAAUCCAAGUGGUGGGGU  
>P3148  
UCCCUUGGAGCACCUAGAGGAGGGUGGGACGCGGGGAACUU  
>P3149  
GGAGGAGGAAGAGGAGGAAGAUACGAGGUGGAGGGGGCAG  
>P3150  
UCCCUCUGAGCAGGACUCUCAAGAAGAAAGACAAGCUGCUCU  
>P3151  
CAGAGGGCACCAGCCGCGGGAACCCCCGGGCCUCCUCGCGC  
>P3152  
GAGCGGCUAACCGGGGACCCACCGCGGGAGCCAGCCUAGC  
>P3153  
GCACUAUGGGAAAUCUGCUACAUCGGUCGGUAGAUGGGG  
>P3154  
GGGCGGGGGGCAACAGCAGCAGCUCGGCCGCAUGCAGUCG  
>P3155  
CGGCGGCCGAGCGGCAGCUACAACAACCGGUCGCUCUCC  
>P3156  
GAAAAUCUUCAUAAACUUUAACCCACUCUCGUUUAUCCCA

>P3157  
CUUGUGCUGCAGCGCCACACAGAAAACUGAAACAAAACCC  
>P3158  
GUCCAGUUCAAAGAAGGGAGAGUCGUUUGCCUCGUGUAGC  
>P3159  
UAACCUCCACUGCCUCCACCACCACGGCCUUAAGAAAAAGA  
>P3160  
UGUUAACAUGGCUAAACUGAGUAUCAAGGACUCAUUGAA  
>P3161  
AGCAGAAGAAGCUGAGGAUGAGAAGAUGGUAUGAUUGAAA  
>P3162  
GGAGGCGGCGGUGGCCAGUAUGCCUGGGAAACUCCUCUGG  
>P3163  
GGACGAGGAUGAGCGGCCUGAGGCCGAGGACGGCCCGGGUG  
>P3164  
GACCUGGGACCCCAUCUCAAAUCAGGCACUGCUGGGAAGAA  
>P3165  
CUUCCAGCUCAUCCACCCCACAGCCUCAGGUUUGGCAGC  
>P3166  
CUAUUUAGGGAUAAAACAUUAGGUGCACAAGAGCUGGGG  
>P3167  
UGC GCGUAUGAAACACUGGCUCGCGGGCGGCGAGCGGGGCG  
>P3168  
GAGCGGACGUAGAGCAUCGGACGCGGGCGCCGUGGCGCUGG  
>P3169  
GCCCGACCGCGAGCGUGCCAAGCGGCUUCAGCAGCUAGCGG  
>P3170  
GGACCAGGUCCUGCUCACCCAGGAAGAGGCCAGUGGCGAAG  
>P3171  
AGCUCUGCUCUCCAGCGAGGGACGCUUGCCUUCUCGCGGCUU  
>P3172  
GAGCGCCGCGGCGGCGGCCCCAGGCCUAGCUCUCGUGGCCG  
>P3173  
CAGCUCAAUGCUGGGUGGCUAACGCUCGACGGUGCCCGGCA  
>P3174  
GGCGAACUUGGCACACAGGGAGGAAGGGAAAGGUGUGUGA  
>P3175  
CUCCCCGGCCGCGGAGGUACGCUGAAGGAGCUGCCGAG  
>P3176  
GCGGCAUUGCAGGCUCUGAGAGGAGGGGACCCGGUUCGCGG  
>P3177  
AGACGUGGGCACUGCCCCUGAUGGGGAGGAAGAGGGCUGAG  
>P3178  
GCGGCAGCAAUGCUCGUGUAGAGACGCGGCUUUCGGCAAG  
>P3179  
GGAAGCCGGCGAGGAGGCGGAGGGGAGGAAGAGGAGGAGG  
>P3180  
GGCGGAGGGGAGGAAGAGGAGGACGACAGCUUCCUCCUGC



>P3181  
GAGCCGGGCAUGGCUGAAAGAGGGCGGUGGGGACGAGCCCC  
>P3182  
CUGCGGAAAGUGAGCGCCCCAGCCCCGACGGGAAGGUGUAGU  
>P3183  
CAGCGUGGAGGAGGCUGAGGAGGCUGAGCCAGAUGAAGAGU  
>P3184  
CACCUCAUUCUUGCUCAGGAACCCGUUGUCCUGCAGGGCCA  
>P3185  
GCCCCUCAUGGGCCUCCAUAGGCCCUCCGUUCUUAUAUAUC  
>P3186  
UGAGCCAGCCUCCAUGUUUUUAACCUGGAAAGAUAGAUA  
>P3187  
UGAGGGGACAGGGGUACUGGACUCCCCGGCUCAGCCUGCGA  
>P3188  
CGGGAAGCUAUAACUGCGCAACUGGGAUUCAUCCAGGCGG  
>P3189  
AAAAGGAUGCAGAUGACUAUAGAAAUGAGGACGACGAGGAG  
>P3190  
CUUCCAGCCGCCCCUCGGCAACUGUGUCAGCAUGACCCGG  
>P3191  
AAGAAUAUGACGAGAAGACGAGUGAACUACUUGGUAAGUGA  
>P3192  
CGCCAGGCCGGGAAGAGCACAGGGACGAGGGGUCAGGCUU  
>P3193  
UACGGGUCCCCGGCCCCGGUCACUAUGGACAGUUUUUUCUUC  
>P3194  
GUUCUUUUCUCUGUCCAUAACCCAAGGUCUCCAUA AAAU  
>P3195  
AUGUGACUUUCUGUUCACAGAUUCUCUAACCAUGGCACAGG  
>P3196  
GUGUCUCAUCCUGCAGCAUAGCUCCUCCAUUUCCAGGUCC  
>P3197  
CUACCCGGAAGAGUUCUAGCAGUGAGGAUUCUCCAGUGAC  
>P3198  
CCCGGUUCAGGACGUGUGGGAGCAGCACGUCUCCCAGGGC  
>P3199  
GAAGGAAUCGUUAGGGGGCCAGGGAGAUGUGACUGAGGCUG  
>P3200  
GGAGAAGCAACAGCCCCAGAAGCCACAGGCGCAGAAGCGGG  
>P3201  
GAACGUGCGCGGCUCGCUCAACGUCAACCUCAACUCGGUGG  
>P3202  
AAACAAAACAAACAGAGCGAGAAGGGCCAGAGACUCUCCG  
>P3203  
UCUACAUCCAUUUCCCUUAUUUCGCUUGCACUGAUUAAA  
>P3204  
AAGCACUAUGCCCAUUUCUGAUCAUUAUCCAACUGGUAA

>P3205  
UAUCCAGCCUCUAGUCUCCGAGAUGACCUUUCAGCCUCUC  
>P3206  
GAAGUCAGAUUAUAAAGAGCAAAGGGGGGGGAAGCCGAAGA  
>P3207  
UAUCACGUACAGCAAUGAACACUUCACGCCGGGAAACCCAC  
>P3208  
AGCCGCCGAGCCGCCCGCGCACACCUGAAGCGGCCGGGCCA  
>P3209  
UCGCGCAGCCCCGGACCGCGAGGGGAGCCUCCAGCGCAGCG  
>P3210  
AUUCAGAAGGCACCUGGAGAAAGGACCUGAAGCAGAUUCU  
>P3211  
AAGAACGGAAAAGGCAGCGUAAGAAGAACGCAGGAUAACA  
>P3212  
UGCGGCCACCGUCCGAUACACGUCUCCGGGUACCCGGUAC  
>P3213  
UGGCCGAGUAUGAGAAGACC AUCGCUCAGAUGAUAGGUAGG  
>P3214  
CCCUCAGAAGCAACGUUCCACUACUCGCCACUCGCUGCGG  
>P3215  
CAGCGCGACGAGGAAGAGGAAAAGAAGUCGAAAUGAGGA  
>P3216  
CUCCUCAAACUGCCCGGCUGAGCCGACCUCUCCACGGCCG  
>P3217  
CAGCCUGCCACCUCACCUCAGAGGAGACCAUGGGCCUCG  
>P3218  
GGGUGGGGACGAGGGUGUGGAGGGGCAGGAAGCACGGCGGG  
>P3219  
UUCGUUCUCGAGCCAGCAGAACGGGUUGAACGUGUCGACAA  
>P3220  
GCUGGAUGCCAUCCACCCACACCUUCAGCUCCAUGGCCGCC  
>P3221  
GAGAGGGUGCCAGCGGCCGAGCUGAAGUUGGGCCGAGAGC  
>P3222  
GGCCCGGAGCCAGGGCCGGAUGGACACCCACAGGUCGGCC  
>P3223  
GUCAAGCCACUGCAGCCAGCAACUCGGAGGAGAAGACCCCG  
>P3224  
AUGCCCGGGGAGCUGUCGGGAGUGGCGGGAAUCGGGGCCAU  
>P3225  
GGGACAGGCACUGGCCUCAGACCGGGGCCACACUGAGGUCU  
>P3226  
CACCCGUGAAGCGUCAGAGGAUGGAGUCCGCGCUGGACCAG  
>P3227  
CGCGUGAGUAAAUGCCAGGAACAUGAGACUCGAACGUGGCA  
>P3228  
ACCCAACCCCCUGGGUCCCACCCUCCUCAAGGCCUCCUC

>P3229  
GGUUCUGUUUAGAGUCAGUAUGUUAGGGCGCAGUGGGCA  
>P3230  
AGGUUGGACCCUACUGUGACACACCUACCAUGCGGACACUC  
>P3231  
GGAGCGGCCUCGGCUGGCGGACCCGGGCGGAGGAGCGCGGG  
>P3232  
ACGCUGGACGAGUCGGACCGAGGCUAGGACGUGGCCGGCGC  
>P3233  
GACGAUGGUGAAGUACACGUACUUGCCCGUGCGCUCCACGC  
>P3234  
GAAGGUGACGAGGAGGGAGAAGACGAGGAUGAUGCGGAAAU  
>P3235  
GGCGGCGCAGCCCCAAAGCGAGCGAAGCUAGGGUCGCCGCC  
>P3236  
GGAGAAGAGGAAGAAGAAAGAGGAGGCGGCCCGGAGGAAAC  
>P3237  
UCCUCCUGGACCUUGCUCACAUAGGUGGUCCUCUCCGCAC  
>P3238  
AGCCCGAGUCGCGGCGCUCCAGGAAGGGGGCGGAGUCUCU  
>P3239  
GGGUGAUGGGGCUGUGGGCAAGACGUGCCUGCUCAUCUGCU  
>P3240  
CCCUCCUUGGCACCAGACGAACCUUCUUGGCCCCUCAGG  
>P3241  
UGAGGCUGAGGACCAGACAAAGAGCAGAAGGCAGAGGAAA  
>P3242  
UGCCUUCAGCCUCCAUUGUAGCCGUCCUUACAGCCCGGC  
>P3243  
GGGUGAGGAGGUCGCGCCGGAAGUGGCUCUAGCCGUGGCGC  
>P3244  
CGAUA AUGGUGUUGGGGUCCAU CGCAGCGCGGACUCGGUCA  
>P3245  
GGAGAAGCAGGAGUUGGAGAUCAGCGUGUCCUGAAGGAAC  
>P3246  
UGUUUGGAUUUUAGCGUUCUAGAAGGGAGGAGUUUGAU  
>P3247  
GGGGGAGGGAAGGGGGAGGAAGGAGUCGGGGACGGCCUCAA  
>P3248  
AGAGCAUCACCCUGUCCCCGAUCCUUCUUCCUCUCUGUU  
>P3249  
UGAAGAUGGACAUUCUUUAAUCCGCUGUUGCUAGAUUUCU  
>P3250  
UUUAGGAUUGUAGAGGAGGAAGAGAAGUUUAAGAAGCAAUG  
>P3251  
GGGAGCACGGUCUACAGCAAACACUGGCUCUUCGGCGUCCU  
>P3252  
GCCAUGACGGCCGCCUGGCGACUCCCUUCCCCGCAGGCAGA

>P3253  
AAAGGAACUGGAGAAAGAAUACUUGCAAGAAAAAGCAAAG  
>P3254  
CCCUUCCCGCUGCUCCAUGGACGCGCAGAGGCAGCCCCGU  
>P3255  
CAAAGGAGUGGAGAAGUACCACCACAGAAACUUCAGGCUUU  
>P3256  
GGUCUUCCUCAGUGACAGACAUUGUUGAUUAUCUUGAUUCC  
>P3257  
UGUGGCCUGUGUGGACUCGCAUCUUGCCCGAAGCCGGGCGG  
>P3258  
UUGGCAUCUGCUCAACCGCCAUCAUCCAUGGAACCAGAAGU  
>P3259  
GUGCCCGGGCCUGCACCAUGAGCGUCCCGGCCUUCAUCGAC  
>P3260  
AUGGGAAGCUAGAAAAGAAAAAUUA AACUAAAAACCACCCC  
>P3261  
GGGAGCACGGAACAACUCCGAAAGAGAAGGCACAGCUGACU  
>P3262  
GCCGCCGCCGUUCAAGCCGAGCCCAGGCACCCGGGUCCCG  
>P3263  
CAGUCACCAUCUGGCCGAAUACGUCCACGGCUCCAGGCCU  
>P3264  
ACUAGGGAAUGGGAGGUGAGAGUGGCUGACACCGACCCAAC  
>P3265  
UGUACUGGGUCGGCGCGGGCACCGUGGCCUACCUAGCCUG  
>P3266  
GCGUCACCCGCUCGUGCCUCAGUCGGCGUCGGACUGCACAG  
>P3267  
UCUGGCUGUGCUUCUUCAUCAGAGGCGGGGGCUGCUUGGCC  
>P3268  
CGUGCCGGGCCGGGCAGUGCAGGGCAGGGCAGGGCAGGGCA  
>P3269  
GGCGGAGGAGCUGCUCUUGGAGGGGAAGAAGGCGCUGCAAC  
>P3270  
UUUUAUCUCCCUGUGCAGGGACUGGGCGACCCUCCGUUCUG  
>P3271  
AAGGCCGAGGCACUUUCGGAAUUCACAGUCUGCAGCAUUG  
>P3272  
AGCUGUUGGGCCCUGAGAGGAUCCAUCUCAGCCUAGCACCG  
>P3273  
UGGGCAUGACGGGCUGGAGGACAAUGCCCUGGUGGGCUGGA  
>P3274  
UGGUUUAUUUCUGCACGGGAGGACCUUCUGAGUUUACCUG  
>P3275  
AAACCCCAAAGCCACGGAGAAAUUCAGGGAAGGUAAAAGAA  
>P3276  
GCCCCGGAGCCUGGCCCCGC AUCUCCGCGGCCGCCGCCUCC

>P3277  
CGCCGGGGCGAAGGAGCUGGAGGCGCAGGCGGCGGGCGGCG  
>P3278  
CCCAGAAUAAGGAGGAGCUGACCCCGGGGGCCCCCAGCAU  
>P3279  
GGUCCCCCGCUGCUGCCGGGACUGCUCGCGGGCAGCUGGG  
>P3280  
AGGAUAGCAGUGGCCUGAGAAGGUGAGAGCGGGCCGAGGU  
>P3281  
GCUGCUGCUUCUGUCAUCUGAGGGCUGUGAGGUGGCUGUCA  
>P3282  
AGGGAGUCGCGGGCCUUUUGAGGGAGGAGGCAGAGCGCGCC  
>P3283  
CCCGCGGUCCCCGGCUCGCCGACGCCGCCAUGCUGCACGCA  
>P3284  
ACACGGAGAUUGCCAACAGCACACCCAACCCGAAGCCUGCA  
>P3285  
UCCGAUCCUUGGAGAUGGGACCGGCUCGCGCCGUGGAC  
>P3286  
AAAAGGGAAAAAAGAAAGAAAGCAGCAGCAUGAUCCUGACA  
>P3287  
UGCUGGCCACUCGAAGCUCCAGGUCACCAUGCCUGGGAUAA  
>P3288  
AAGGGACAUGAGGCAGCCAAAGAAUGGUCUCAGGGUGAGGC  
>P3289  
CCAGCUUCCCCUCCAGAUUCAACCUCCUGCUUCUCCCCA  
>P3290  
AUAUCAUACUUGCAGAAAGAACUCUCUUCACAGGUCUAAA  
>P3291  
GCCUCGGAUUCCUGCGCCAAAGCCAAGGUCCGGCGCCCACG  
>P3292  
GGGACUGGUGUGUGACGAGAGGAGGGCGGGAAGGGUCAG  
>P3293  
UCCUGACGAGCCUCUGUUGACUCUGGAUCUCCACUGAGU  
>P3294  
GAAAUGGCACCCUUCUGACAUUCUGAGGCAGCUGGACUGG  
>P3295  
CGUGAGUGGGCGCCGCCGCCACCGCCCCGCGCCGUCGUC  
>P3296  
CUCCCCUCCACAACAGUCCGAGGUUAUGCGUCUCAAUGAUC  
>P3297  
GAGCCUGGGCUCUAGAAAAACUAGCCAGAAGGUGGGGCAC  
>P3298  
AGCCAGGCUGCUGCAGGAACAGUUCGCGGGUCCUAAAGCC  
>P3299  
CGCGCCGAAGCCUGCGCGCCAGUCCUCCGGCCACUGCUAUC  
>P3300  
AGGGGAAGAGCCAGUCAGAAAGAAAAGAGGCAGACCUAUGA

>P3301  
GUUGCCGCCUCCCUGCCGGCAAGUGUGUGAAGAAGAAGCUG  
>P3302  
CUGCUGCGGGUCCUCGUGGCACCCGCCAAGUGUCCGGGCCG  
>P3303  
GCGGGGCGGGGCCUGGGUCCACCGGGGUUCUGAGGGGAGAC  
>P3304  
CGCCCGCCUCCGCACCAGGACACCUUGCCGUAGGCUGUG  
>P3305  
UGGAACCAAGACACAAUGGAACAGAAGACAGUGAUUCCAGG  
>P3306  
UGGAGGACGCUGACUUCGACACAAGCCUAUGGUGCUCCUC  
>P3307  
AGCGGCAGACCCGCUCUUUCACACAGUUUGACCAUGGCCAC  
>P3308  
AGGGCGGUAGCGAUGGCUCGAGGCGCGGAAGGGCAGGGACC  
>P3309  
GAGAAUACUUUUUUUAAAAAUGAAGGGGUGGCUCCCAAA  
>P3310  
GGUCCGGGACUUUCCGUUCGAGCUCAUCCCGGAGCCCCAG  
>P3311  
UGGGGUUCAGGAGUUUUGCAGACAAGAACUACGAUAGCAG  
>P3312  
CUAGAUGUAUGCCCCACCUGACUCCAUGAGGCUCCUCAGCU  
>P3313  
GAUCACGGGGCCCCAAACACAGGGGGCACUAACGAGAGGAG  
>P3314  
GGAUGCCUGGCUGGCCAAGUACCCACCAUCCAAGUUACCC  
>P3315  
ACGCGGCGAGAGAGGCCCCGAGAUGCCGAGCAAGAAGAAGA  
>P3316  
GAGUAGAGGCGAAGGGCAGGAGGGUGUCGGGGGCUGCAG  
>P3317  
GGCUGCAGUGUCGUCCAGCCAGGGGUCAUCCUCUCCUAGGG  
>P3318  
GCUCCGCCUCGUCCUCCUCCAGCACCUGCGGGGACCCCGGC  
>P3319  
GCUUCGCCGGCCUCAGGUGCACCAGAGGAGCCAGCAGGGC  
>P3320  
GCCUGGCCUCCCCAGACCCCAGAGCCAAGAACACUAAGCAC  
>P3321  
GAGAGCCAUGCAGAUGUCCUACGCCAUCCGGUGCGCCUUCU  
>P3322  
CUGCACCGGAAUCUGGGGAGACCCGCCCCCGCCCCACCGG  
>P3323  
ACCACCCCUGCACGGUGCCAGGCCCCCCCAGGAUGGCCAC  
>P3324  
GCAACGUCGACGGGGCGGAUACGACUCCGGAGGAGCUGGCA

>P3325  
CAGAGCGGUGCCCAUGGCCAGCUCCAUGGAGCAUGGCAAG  
>P3326  
GGUGCAGGGGAGGUGGAGAGAACCU CGAGGGCCGUGGAGGA  
>P3327  
UCGGAGCGGGUGGCCAAGCUAGAGCAGAGCUAUGAGGCACU  
>P3328  
GAGGCGGCGGCACUGACAGGACGUGGGCUGUGGGGCUGGCC  
>P3329  
CUGAGCCUCACACAUGCCCACGCUCCCCUGACACUGAAGA  
>P3330  
CCACUCCUCCUGCCUCCUCACACCU CAGAGACCUAGCUCG  
>P3331  
GCGGCCUGGCAAGAAUGUACAGCUGACAGAGAACGAGAUC  
>P3332  
CGCAUGGCGGCCGUGUUUGAUUUGGAUUUGGAGACGGAGG  
>P3333  
ACCCCCACAACAAGAGUAGCAGCGAGGUCCCCAUGAGU  
>P3334  
CGCAGCCCCCGCCAUCGGGUAGAGCGGCGGCUCGCCUCCA  
>P3335  
GGCCCGUCCGGCCGCGGACACAUGGAGGCAGCGCCGCC  
>P3336  
CCUUGGAAAACUGGAAGUCCACUGCGGCCGCAUCCUCCAGG  
>P3337  
GCCCCAGGCCGCCAGAGCCCACCCGACCCGGCCCGACGCC  
>P3338  
ACAGCCUCCCCAGCUGCCCAGGAAGAGCCCCAGCCAUGGA  
>P3339  
CGAGGACAGAGGGCGCACGAGGGGCCGGGCCAGCCCCGG  
>P3340  
GGAGCAAAGAUGGGGUGCCAAGACGGUGCAGGGCUCGGGC  
>P3341  
AUUUUUGUGUCCUUGCAGGACUUUAGCCGGUUGAGAAGGA  
>P3342  
CCGUGGCCAUGAAGCUAUGC AUGCUGAAAUGGUCCUCAUC  
>P3343  
UCCUCCUCGGCGCGGCCUGAGCGCCCGGCCGACCCCGGC  
>P3344  
CAACGAACAGGAUCAGGACCAGUGGAUGAUCUAGGUAGACA  
>P3345  
ACACCCCUUCUGCCAAGGGAAGCCCUUCAGGAAGGACCC  
>P3346  
GGAUGGCGCGGGGACCGGAGCCUCCUCCUCAGCGACUCG  
>P3347  
CGGAGUUGAGCUGGUGAAGAAGAGCUCGGGCUCAUCAUGAA  
>P3348  
GCUUCGCCUACUGUUUGACUACGUGCGUGCAGCCUCCCCUC

>P3349  
UGCGCCACAGCCGCCUCGGCACGCUCACCCCGGCGGCCCGG  
>P3350  
UGGAUUUAGAAAACCGUUCUACAGCCAAUGUUCUAGAAGAG  
>P3351  
CAGGGAAGGUGGAUUCUAGGAAAAGGGAGUGCCUGAGGUAG  
>P3352  
GAGCAGCUGUGACUGUGGCCACUAUCUCCCUAACUCUCUC  
>P3353  
CGUCGCCGGAGAGAAGCAGCAGGAGGGCGGCGAGCAGCAAG  
>P3354  
CUCGGGCGGCGGCGUCCUGGAGACCCGCGAGAGAUGGAAGC  
>P3355  
UCCGAUGCAGCAGGCUCCGAGAUAUCAUACAGACGCCAUUAC  
>P3356  
GCAGCACAGGGAAAGGCUGAAGCAGUCUUCGCGGCUACAGG  
>P3357  
AGCCUCGCUCGCCUGGGUCAGGGGGUGCGGUCGGGGGAG  
>P3358  
UCUCCUUGUCGGCGCCGCUGAUUCCCGGCUCUGCGGAGGCC  
>P3359  
AGAAAGGCGUAAAGAACUUAAGCGACUUCGGGGUGAGGAUA  
>P3360  
UUUGCCUUAUUUUUUUCCUAUAUUCUUCUUGUCAAAUUU  
>P3361  
GAAAAGGAAAAGGAAAGAAUAGAACGUGAAAAGGAAGAGCU  
>P3362  
UUUUGUUACCUUCUUUAAAAAUUCUCCACUUCAAUGAAUUC  
>P3363  
AAUGUAGCCCCAUGGGCGGGACUCGAGGCUCGGUGGACGGC  
>P3364  
CCACUCUGUAUCAUUGUAGA AAAAGAGGCAGAUUAUCAGC  
>P3365  
AGCCGAUGAAGCGGAGUUGCAGCGCCUGGUGGCCGCCGAGC  
>P3366  
GCCAUGGCCUCGUUCGUGACAGAAGUUUUGGCACACUCCGG  
>P3367  
GGAGGAAAGAGAAGGAGGGCAGUGCUCAGUGGUACAGAAG  
>P3368  
CCCGCAACAGCCUGGAGCCCAGGGAGCCGCCUAGCAUCACC  
>P3369  
AGUCCGGUCGCAAGCGUCGCAAAAAGCGGCCGAAGCCUGGC  
>P3370  
CCUUCUGCGAGCCCUGAGGAAGCCUUGUGAGUGCAUUGGC  
>P3371  
CCGUCACCCUCGCCAGUCAUAUUGCGUCCACACACCC  
>P3372  
GGUGUCUGCCCCAGGCCGAUAUGGAGCGGGCACUGCUGCA



>P3373  
AGCUUGUUAGAGGGCUUUUUAAAAUAAAAGUUGAUUCCG  
>P3374  
CCUUCCCAGAACCCCCUGUCACUGAUGAUGACCCAGAUGUC  
>P3375  
ACAGAAGAAGGUCUGGCGGCACAGAGGGCAGCGCUGCGCCG  
>P3376  
CAGUUGGACAGCUACGCGCCACGGGCUGAGGCUGAGAAAAC  
>P3377  
GUGGAGGAGGGAGCAGAAAAACCCAACUCAGCAGAUCUGG  
>P3378  
CUCCAGCCCCAGAGGGAGAGAGAAGCAGAAGCCCGCCAGG  
>P3379  
GCAUGUUCAGGAGCACAAGAUCAUAGCACCGUGACAGUG  
>P3380  
UCCACCCACUCCCGACCGAACAGCGCCCGGAUCCGAG  
>P3381  
CACCUGGCCGGCUUCCUAAACGAUCCGCGGGGCUCCUCA  
>P3382  
GAUUCUGCAGUGGUGGGCAAGGACAGUCCGGUGAGGAAG  
>P3383  
GGCAGUGCCCUUGUGGAAGACUGGGACUUGGUGCAAACC  
>P3384  
CCUUGGAGAAAAUGGUGAAGAAGUCGAGCAUGGCGGCAGCG  
>P3385  
GUCCGGCGCGGGGAAAGAAGGCAGCGGAAUUUGAGAU  
>P3386  
GAAGAAACAAUGGAUUCUUAAGACCAUAUGCUGACAGAUC  
>P3387  
GGAAAGUGCGUGCGCUUAUAUAUGGUGGCUGCGGCGGCAA  
>P3388  
CCUAGGCGCGGCGGCCGAGAUAGGGGCCCGAGCCUCCC  
>P3389  
CCGAGUCUAAGAUCAGCGGACACCAGGGCUGCAGGCCGCU  
>P3390  
GGACCCGAGACCGCCGGGCAGGCAGCCGAGGCGCGCCCCG  
>P3391  
CACGGGUGAACGGGGCAGGAGAGGUGGUCGGCUGGAAGACG  
>P3392  
GAACGCAACUGAAAAACAAAAGUCAACCAAGGAGCGGCGC  
>P3393  
ACGGCCGCGGCGGCGGACAGCGCGGAAGUCGCGCGGGAC  
>P3394  
GAAAUGAGAAGAAUGACAAAGAUAAGAAGAUAGCUGAGUU  
>P3395  
CCAGGGCAUGGCCAACAUAGAGCCUCAACCUCAGCGGCU  
>P3396  
GGGCUUCCUCGGUGGCGGGCAUGGAGGCUUCGCGCUGCCGG

>P3397  
AGAGUUGGCGCUCGGGGCGGACUCCUUGGAACUGGCUUAGC  
>P3398  
GAAGCGAGCCAUGUUCCCGGAGCCGCGUCCCGUCGGUGGCC  
>P3399  
CAACCCUCAACUGUCACCCCAGGCACUUGGGACGUCCUGG  
>P3400  
GCGGUGGCGGCGGCUGCCCGAGCCAGAGCCUGGGACGGGA  
>P3401  
UGCUGCCCCUGCUGGGGAGAUGGAGCAGGAUAUCCUUGCA  
>P3402  
ACGAAGGAGAAGCGGGGGCCAGGCCGAAAGGCCCGGAAGCA  
>P3403  
AAAAGGCAGAGGUGAAGGAGAGAACAGAGGAACCUAUGGAG  
>P3404  
GAGGAGGCGCUGCUGUCAGUAUUACCGACGAUCCGGGUCCC  
>P3405  
UGGUGGGGGACCCUGGCUCCACACAGCCUGGGAUGGGAGAG  
>P3406  
CUGCCACCCAAGCGGCCCCGACUAGGGGCAGGAAACAAGAU  
>P3407  
UGUGUGUGAAGCCAGACGUCAGCGUCUACCGGAUUCGCCC  
>P3408  
CAGCAGCAGCAACAACAGCAACAGCAGCAACAGCAGCAGCC  
>P3409  
CCGAGGACUAAAAGGAGAAGAGGAAGUUGUGGAAGAGGCG  
>P3410  
CCCAGACUCCAGCUGCUCCAGCCGUCGCGCCUCCGGGCCU  
>P3411  
GCAGUGCUGUGUGGCAGCAGAGGUCCUAGGACGAGGAGCA  
>P3412  
GAGCGACGGGACGGGACGCGAGCGGGAGCGCAGCCGCCUC  
>P3413  
CUCUCAAAAAACAAAACCGAACAAAACAAAGCGCCCCUAC  
>P3414  
CCUGGCCCGCAGCCGGUGACACGGCGCGCGGAACAUCCGUG  
>P3415  
CGACCGAAGCGUCCAGCCGAUUGUGGAAGAGGAGGAAACU  
>P3416  
UGCGGUCACAUACUCCAGAAGAGCGGACCAGGGCUGCUGC  
>P3417  
GGCGACUCCCGGCCUCUUUCACUUCGUAAAGGCCUUCAACU  
>P3418  
CGGUGAGGCCGAGGAGGAGAGCAGCAAGCCUGUCCCGCC  
>P3419  
ACGAGGAGGAGGAAGAUGAGAGCAGCAGCAGCGGCGGGGU  
>P3420  
AUCCGAGAGUCGGAGAUCGGAGAGUCGGACACAGGACAGUC

>P3421  
UAAAAGUUUUUUCCGAUUCAGUCGCCUCAUCUUCAGGAAA  
>P3422  
UCAUCUUCACCUCUCCAUAUAUUUGACUGCAUUGCUUGAGC  
>P3423  
GCUUGUUUAUGACAGGAAUUAAGCGCCUCCAUGACUCUGAAA  
>P3424  
UCGGAAGAGAAAACAAUGAAUUAAGAAGUGGUAAGUAUGAA  
>P3425  
GAGUAAGAAUGGGGAUGGCAAGGGCAGAGUAAGAGAAAAG  
>P3426  
CGACUCUGGCCUCCGGGAGACCCCGUAAAUGCAGCCGUCC  
>P3427  
CGUUCUCUCGGAAUUCUUAUAUAUCAUAUCGUCCCUCAGA  
>P3428  
AAAGACAGUUUGAGAGAGAAAGUGGGCCAGGGGGCCAAUG  
>P3429  
CAGAACGGCGCGGCUCUCCCAGGGGCCGAUCGGGGACCGC  
>P3430  
CUGCAGACUGGGAUACCAGAAAGACGUUCAAGUCUCGCC  
>P3431  
UUCGUCCGCUUUGUGGUGUUAACAGGGUCUCUAGGACACUGA  
>P3432  
UUCAGCAAUAAAAGCAAUCGAAUUAACAACUACAAGUGAAAC  
>P3433  
GUAUAUUAUGCAGAGCAUUCAGAGCAAUACUCUCUCUCCG  
>P3434  
AGCGCUGGGGACAGGAUGGGAUCAUAUGAAUGUACAGCUGG  
>P3435  
UACCCCUUCCUCUCCAUGCAAGUGUGGCCAGGGCCCUGGGU  
>P3436  
GGGAUGGUGGCAGCCAUAGGAGGGCAGGGUAGGGUAGGGCC  
>P3437  
GUCAGGAGAAAAGCGGAGGAAGCUGGGUAGGCCUGAGGGG  
>P3438  
CCGGUGUUAGAAGCGCUGGUAGGCCUUGGAGAGGCGGGUUA  
>P3439  
GCCAGAAGCGCUCGCUCCACAGCCAGCCCCACAGCAAGCUU  
>P3440  
UGCCAGGUUGUUUUUCCCACAUUCCCAUUCUUCUAGAAGC  
>P3441  
CCGGGUGGAGGGGCAAGGCGAGUGUGUGUCCUUAUCCUAGC  
>P3442  
CCCAGGAGGCUGCACAGGGUAGGUUGGCUGUGUUGGAUAUU  
>P3443  
GAAGGAGGAGGCUCCGGCCGACUCCGCCAUAGUAACCACCG  
>P3444  
CCACUGCCCUGCCCAGCUUCAGCACCUUCAUGGACGGCUAC

>P3445  
CCAGCCAGAGCCGCCUCAGAGCUCACCUACACCUUCUUUC  
>P3446  
AAAGGAGGAGCUGGAGACAGAUUGUAGGACCGAGCGCGGGC  
>P3447  
AAGGAGGCCAAGAGCUGGCAAGAGGAGCAGAGUGCUCAGGC  
>P3448  
GCAGAAGAGUAUUUAAUGUUAGGAAAGAGAAGAACCGCGC  
>P3449  
GGCUCGCGUACGAGUUCGGAGUUACAUGCGAGGGCAUGU  
>P3450  
UCUCUGCCUCUCUCUCUCCCACUCUCUUUCUCGUCUCCCCU  
>P3451  
AUACGGAGGGAGGGACCCCAAUAUAGAAAUUCUAACCAC  
>P3452  
CCAGCUGCGGGGCAAGAUGGAGGCGCUGAUUUUGGUAGGAG  
>P3453  
GUGAUAGAGACAGAGGAACAAGAGAGCAGCAGUGAGAAGG  
>P3454  
UUGCUCGUGGUUUGGAGACCAGGGAAUAAAGCAAGAUCUU  
>P3455  
ACACAGCGAAGUAAACCCCAACACCCGAGUGAUGAAUAGCC  
>P3456  
AGGCCUCUCCAAGACAGCCAACGUAACCUGAAGCGAAAGG  
>P3457  
GACAAGGAGGGGAACGGCAAAGUCAUGGGAGCAGAGCUCAG  
>P3458  
UAGGAGGAGCGGGGAGGUUAUACUGAUGGAGUCAGCUAGA  
>P3459  
AGAAGGCGACAGUGAGAAGGAGUCCGAGAAGAGUGAUGGAG  
>P3460  
UGGGUAGGCUGAGAAAGAAAAGGAAAGACAAAGCAGGAAA  
>P3461  
UCGAAACACUGAGAAGGCUAAGACUAAGGAAGUCCCCAAGG  
>P3462  
ACUCGCCCCUGGGCCUCCGGACAAAUGGGGUCUGCGGUUG  
>P3463  
GAGAGCAGGGGGAGGGGAGCACCAUCUUGCAACACAUCAGC  
>P3464  
AAGCGGUGCCCACUCACUCCAGAGGACCUUUCUCUCUUGGG  
>P3465  
CACCACCACCACCAAAAAGAAAUAAGAUAAAGCACACAC  
>P3466  
CCGGGCCUACAGUGCUGAUGAGCACCUCUGCUCUGCCCCGG  
>P3467  
GUGCCUGCUCUCUAGCUUGGAGAGGGUCUGGGAGUGAAGGA  
>P3468  
UAGGCAGCAUAGGAUUGACAUGAUGUGUCCACACUUGU

>P3469  
AGCCUCUCCCCUACCCGAACACCGGCCCCGGCUCCACCGAG  
>P3470  
UCACCUCCCUCUCCCCAACGAGGCAUGGAGACCCCAGCUCA  
>P3471  
UCACUCCAACCCCAUGGCGGACCACACGCUGCGCUAGUGAG  
>P3472  
GCGGGGGGAGUGGAGUCCC AACUUUUUUCGGCCUUUGCC  
>P3473  
GAGCAGCAACAGCACCGGUCAGGGGGCCGCGGCAACAAGAC  
>P3474  
CAGGCUUAAAAGUAUUCUCAACUAGACGGUGAUGUUUUA  
>P3475  
GGAGAAAGAGGAGGAGGACGCAAUGAAGAGGAAGGGGACA  
>P3476  
AGAAGGACUUGGGAUUCGGAGCAGUCGCCCCUAUCGCUGC  
>P3477  
AGCCCGCCGUCGCGCUCAUAUACAAUAGCGUCAGCACGU  
>P3478  
GGCAUCCUCGGGGCCGAGGAGGAAGAGGAGGCAGCGGCC  
>P3479  
UCGCACUGCUUGUUGGGCUCAUCAUGAAGCGCUUGGGCUCC  
>P3480  
CUAGUCAUGGGCCAAAGGUCAGAUACUUCUCUGGGAAAUG  
>P3481  
CCUGAAAAAACCCGUAGAUAGCCUCGGAGACCGCCGUGGC  
>P3482  
GCUGCCUCUACGGCUGAGGAGCAGCCAAGAAAAAAGACG  
>P3483  
CCGGAAGAAGUCGGGGCCCAAGGGAGCCCCUGCUGCGGAGC  
>P3484  
CCAGAGGGCAGUGCGGAAGGAGGAGGAGUGCAUCAGCAGGC  
>P3485  
ACUCUCUCACCCGGUCCUAGAGUAGUGUCCAAUGUCCCCGA  
>P3486  
GCUUCUAAGAUCCEAUUGGAAGUCCCAAAGGGCUGGAGAGC  
>P3487  
GUGAGCAGCAUGGACGUGCUAGCGGAGGAGUUUGGGAACCU  
>P3488  
UCUCUCCGGCCAGCCUCCCCACAGUCCGCAGUCCCCGAGGC  
>P3489  
GGGCAGCGGCCCCCCGGGGUGAGGGGGCCGAGCGGACGGGCA  
>P3490  
GAAGAGGCUGAGCCCGGCCAAGGGAGCAGAGGGCUGGGACU  
>P3491  
ACGGGUAACCGCACGCAAAAUUCUGAUACUGCAACAC  
>P3492  
GCGGGGACCUCCGGCGAAUAAGGUCGGCCUGCGGGUAGGC

>P3493  
AACAGCAAUACAAGAGAAGAUUGAGCAGAACCGACGGGCA  
>P3494  
GGGGAACUAGAGGCCGGGGACAGCAAAGGCGGCGGUGGCG  
>P3495  
GCACAUCCACACCGGUGCAACAGUUUGCCAGCUAAAUUCA  
>P3496  
AGGAGCAGGAAGCCCAGGAGAGAGGGGAAGCAGCGGGGAGAG  
>P3497  
GUCUCCAUGGCGGGGAGACGAGGUGACCAGAUCCGCUGAG  
>P3498  
GACACUCGGCUCAGCCAAGCAUCCUCCUGGGGGCCGAGGA  
>P3499  
CCAGCAGCCCCGCGGCACUCAUGUCGCCUCUGACCGCAGCU  
>P3500  
GGGAUUUCUCAUCACCCAGGACGCUCCUCCAGGCCUCCAC  
>P3501  
AUUUCUCUCCGUCCUUUACACUGGCUGUUGUCACCUUCCC  
>P3502  
UCGUAGCUCUUGGCCGGGGACCUACUAAGUGCUCGGCUCU  
>P3503  
UCUGAGGCAGGAGCAUUUCCAGGGGAAGCGUGGGCUGGACC  
>P3504  
CCGCCCCCGUCCGGGCAGGAGGAGCUGAAGAUCGUGAUC  
>P3505  
CGUCAAAAGGCCCGGAAAGCCACCACUCCACCAUCUUGCGG  
>P3506  
GAAUGGCCCCACGCAGCCCAUGCCCAGGCCCAGGCCUCG  
>P3507  
CUUCCUCCCCGUCCUGCUCAAAGUCCUCAGGGCCUGCAGAA  
>P3508  
CCCGUGGGCGCGAUGAGGUCACUGAGGAAUACAUGGAGUUG  
>P3509  
CAUGGAGCCCAUCGCGGCUGACGAGAUGGUCAUCGAGUACG  
>P3510  
CACAGAAGUUUGCUGGAGUCAACAAAGCGCCGUCUGUCAUC  
>P3511  
CACUGGGCCCUGUGACAGUGACCUGGGGGCUGCCCCAUGC  
>P3512  
GGACGCCGCCGGUCGCCGCCACCUGUCCACUGCAGCAGCA  
>P3513  
AAGCCGAGAAGAUUUAGCAGAGUUUAAGCCGGACUCCAAG  
>P3514  
GUCUUUUCUGGGGCUAGUCCAUUCUCGCUCUGUAUCACUAGC  
>P3515  
GAGCGAUUUAGUCUGAGGCGAGCUUCGGAGCGGCCGGUAC  
>P3516  
CCCGCCGCUAUCGCCAGCUGACCAACACAUGCAACUCGUC

>P3517  
GAAGGCCUGGUGGAUAAUGAGCAGCUCCGCCACGAGCUGG  
>P3518  
GAGCCUGGUGCGCGAGACAGAGGCGGCGCUGAGCCGGGAGC  
>P3519  
GGCACGAGUCGGGUCCUGAGACCAGGUAAGCAUCUGCGGAG  
>P3520  
CCAAAAAUCUGAAGCAGCAGAACCUCCAAAAACUCCACCCU  
>P3521  
UGUGUGGCGAGGGGAGGCGCAGGACCUCUCUCCAGAUCG  
>P3522  
AGCCGCCCGCGCUGUCUGAACGGGUCCGCCGGCCGCGCCG  
>P3523  
GGAAGGUGCGGUACUCGAGGAGGACACGGUGUCGUUGUUG  
>P3524  
UGUCUGCGGCCUUGGGGCCACCCGCGGCUCGCAGGGCUCC  
>P3525  
CCCGGCCGCCCGCCGCCAUGUCCAAGGAGGAGCGCCCC  
>P3526  
AGCGGCGCCCGCUCGCCCGCACCGCCCCAGAGCCCUCCAU  
>P3527  
GGAGGGAGCGCGACCUCGGACCCCGCCUGGCCCGCGGGGC  
>P3528  
UGAGGAGGAAAGAGAUGGGGAGGAGGAGGAAGAGCGGAGG  
>P3529  
ACUCUUCAGCCUCCUCUGAAGGUCCUCCUCCACCAUCGUC  
>P3530  
GCCAGCUCCGCCGAGCUGAAGGCGGGCGCCAGGCCCGAG  
>P3531  
CCUCCGCGCCAGACGCAGGAGCCGUCCCCAGGGCUGCGGC  
>P3532  
GAGCGGAGGCCUUUGGCGACAGUGAGGAGGACGGAGAGGAU  
>P3533  
GUCCUGCGGGGCCAGCAGCAGCUCCAGCCACCAGUGCCCG  
>P3534  
GCUGGAACCAGUUCAGAGGAACAAGGUUUUGGUAGAGGU  
>P3535  
GAGACCGCAGCUUCCCGCAGAGCUCCGGAUAGGGUCCAUG  
>P3536  
AGAAAAAUGUUGAACAUGGAUAAUAUAUAUUGGGAAACCG  
>P3537  
UGCCAUGGUAUCCAUCUUCAAUUGUUUGGCCUUUUUUGA  
>P3538  
GCUAUGGGACAGAGCCCCGAUCCGCCAGCACCACCUGAGG  
>P3539  
GUGUGAGCAGCGGGUCAACUACCUGGCAGGCGGCACGCGG  
>P3540  
AGGUCAGUCAUAUCAUUUGGAUAAAAAAUAGAACAAUCGG

>P3541  
GGUCUGGCCGUUCCUCUGACACUCAGAAGGACACACAGACA  
>P3542  
GCUGUCUCCGCUUUUCUUUCACCUUCACAGAGGUUCGUGUC  
>P3543  
CCAUGAGCCUCUGGGUGGACAGUAUCGGCCUCGUCCUUG  
>P3544  
CGUCUUGGGCCUAGCGGCGAGGCGACCCGCACAGGUGGGC  
>P3545  
GGGUAGCAAAGUGUUACAGAAAAGCGGACUGGAUAGACAA  
>P3546  
GACGCGCUAUCUUAGCGUCAGCGAGGGAAGGUUGAGGAGG  
>P3547  
GCCGAACAGCCAGGCUGCCCAAUUGCAACUGUAGACCAAUG  
>P3548  
GCCACGCAACAGGGAUCGAGAUAGAUUGCGAGAACGAGAAC  
>P3549  
AGGGAGUCCAGCCUAGACAGUCCCCGAAGCGCCGGCGUG  
>P3550  
CGCGCGCAGCCAUGGCCGAGAACCCAGCUUGGAGAACCAC  
>P3551  
UCUACGUUGGAGGUAACAUAUACGGGUCCUGCUUAGGAGA  
>P3552  
GAGUAAGCCAAAGGACGUGGACCUGACACUACCUGGCUGGG  
>P3553  
GGAGCGCCUCAGAGUCUCUGAGCACGCAAGAGAUAAACGA  
>P3554  
GAGGGCAGCAGCCAGGGGACAAGGUGGGACAAGAGGCUCU  
>P3555  
CCGCGAGCCAAAGCAGCGCCAGGGCCAGCACCAGGAAGCG  
>P3556  
GAGGAAGAGAUAGUGACCGUAUUCaucagaagaaggaacu  
>P3557  
GAAUGAAUCCUCUGCCCCGACCAGAUGAAAGAAUCCCUCG  
>P3558  
UCCUGCGCCCUGCAAGAAGGAGCCGGCCUGCCUCUCUCCGC  
>P3559  
GCCGGGGCCACCAUGUCCGAGGGCUCGCGAGUGAAGAGGA  
>P3560  
CGGGGCUGAGCAGGUUUCCCAGGAGCAGGUAGAACUGUUGC  
>P3561  
AUCACAAGUACAUCCCCGGAGGGCAGUGCUUUAUGUACCU  
>P3562  
AGCUCGUGCAUGGUGCCGAAAGUUUUGGAGCAGGGCUUGGC  
>P3563  
CGCCUCCCCACUCGGCCGGCAGUUUCAUCUCCGCCAGCGGC  
>P3564  
GCACCGCUGGUCGUGCCGGACGGCGUGGGCGGUGGCCGCC



>P3565  
GGUGUAGAGGGCGAUCAGGUACUUGUGCUUGGCGUCGGCGC  
>P3566  
CCUGGAGCACCUGGGGUUCCACUUAUACCUGGAUCACCUUU  
>P3567  
GAGCCAGGCUUGCCAGGGAGACCGACAUCCCCUUAUCACC  
>P3568  
GGGCCACCAGGAUUACAAGGAUUCCTCGGGACUGCAGGGACG  
>P3569  
CCCUUUGGUCCGCGGGCUCCAGGGGAGCCGGAAGCCCAGG  
>P3570  
CGAGCCGGCCAGCCUCGGGGAGAGGGCGCGGGGGCGCUGGG  
>P3571  
CGGGGGGUGGAGGAAGCGGAAGCCGCGCCGAGUCGCCGGG  
>P3572  
GAGGACGAGGUGACGGGGCAAGGGGAUGUGGGGACGAGGUG  
>P3573  
GGACUCGGGAAGGCGGCCCGAGUUCUCCCCUGCAGGGCCGC  
>P3574  
CCGGUGCAGUCGUAAAAGCCAGGCCCAUGGAAGGCUCGCUG  
>P3575  
GGCGACGGUGGAGGGAUGUGAGUGACUCUGAGUGUGGAAGC  
>P3576  
UCAGCUCUACUCAUUUCGAGACUGCUAUUUCGAGACACAUA  
>P3577  
UGCCAGAGACAGGAGUCGAAAAGAUGCCUGUGGCUGGAGG  
>P3578  
CCUUGUACCCUACUCGCGAGAUCUGCCCUCAGCCAAUUGA  
>P3579  
GUGUUUGGGCCGGGCUCUUUAUUGGGCCUGUAUGAAGGUCA  
>P3580  
GGGAGGCGGCGGUGGCGGCCAUGGCGGCAGAUGGAGAGCGU  
>P3581  
UGAUGGGGAGCCGGUAGAAAACGCAAAGAUGUUCUUUGAA  
>P3582  
CAGAAGGAGUGAGAACCUCAGCCCCUAAUCCCACUGCAUCC  
>P3583  
GGCGGCGCGGCGGGCUGGGAGCCGCGCGGGAGCCGGGCUC  
>P3584  
UGAAAGGUGGACAGAAAAGAAGUGCGAUGAGGCAAUGU  
>P3585  
CUGGAGGAAGAAGCCCGAAAAGGUUUUAAAAAUGUGUUGU  
>P3586  
AGAACAUACCUCGAGUCUUAAGAGGACGAGUUGCCCAGC  
>P3587  
AACAGAUGCCACAGCCCCGACUCAGCAGCAAGUUACCAUU  
>P3588  
GCCACCUGCCGGGGUUUGAGACCACUUCUCUUCGGGCCAA

>P3589  
UUUCUAUCCUGCUUUUAUU AUGGCUCGACUCCUCUUCUU  
>P3590  
UCUUCCAUCCGCGUUUCAAG AGGGAGUUCAUUCAGGAACCU  
>P3591  
GCGUCCCCGAAAUAGCUGAC ACACUAGGGGCUGUGGCCAAG  
>P3592  
GGGCCGUGGGCUC CAGCCGAAAUCGGGGGCAACGACUGA  
>P3593  
GGUGCGGCCGUC CAGCCACCCCAGCGAUGGCCGAAACC  
>P3594  
AUUAGACAAGAGAUUAUAC ACACUGAGCCUCCACCCAGUC  
>P3595  
GGUAGCGCAAGGCGAAGAGC AGGGCGCCCCAAUCGGCGGC  
>P3596  
ACCCAGGCUCAGCCCAACA ACGCUUCACCCAGGUCUCCGA  
>P3597  
AACAGACCAGGCAUCAGCAC AACAGACCGGGUUUCCACG  
>P3598  
CGGGUAGCGGGUGUCCUUC AACGCCCCUCUCUACACCU  
>P3599  
CCGGGACCCGUCGCAAUA AGGUGGCCUUGGUAACGGCCU  
>P3600  
CCUCCCCUGCAGCGUGGCC ACCGCCUGGUCCACAUUCUGC  
>P3601  
UCGGUUCGGCGACAACGCUA ACUCGACUCGCAGGUAGCCCG  
>P3602  
UAAGUCCCUACCAGCAGCAG AAAGGCUGGGCAUCAGGCUGG  
>P3603  
CUUGUCGCCCACAUUUAACA ACUCCUGGGCCAAUUCUCCU  
>P3604  
CUGAAGGAGACAGAGAAGAU ACUGAUCAAGAAACAGGAAUU  
>P3605  
AGUUGCCGGCGAGAACUACU AGCCGACGAAUUCAGCUUCG  
>P3606  
CCAUCCGUGUGGCCCUCCU AUAGCCCGAUUCGCCCGGGCC  
>P3607  
UACUACAGAAUCAAUCCUUG AACACUGCCUCCACGUCGCCG  
>P3608  
AGCCAGUAUUCGGGAAAGGC AGACAGGUACUGACUUAUUCU  
>P3609  
GGGGAGCAAGCUUAUGCGGG AAAGAGGGAGGGGGACUCCAG  
>P3610  
CGGCGGCGGGAGCGGUCCCC AGGAAUGUCGCUGCCGCCGCC  
>P3611  
AUGGGAGGUGAGGAUGAUGA AGUUGAUGGCGAUGAAGAAGA  
>P3612  
GAGAGCAAAGACACAGAGCA AAAGGAAUAGAUAAGAUAU

>P3613  
AUUGUUGAAGAAGAGAGACUAAGAAAAAAGAAGAAAAAGA  
>P3614  
CGGAGCUUAAUCGCCCCGAGCAGCGGUGACAGGAACCUGGAG  
>P3615  
AAUCA AUGCUUUCUUCGGUGACUUCAAGCACUUUCAGAUCA  
>P3616  
UCACGCCGGGGAGGCCGAGACAGCCGGCGGUACUCAUAGA  
>P3617  
UGAACCGUGUCCUGCAGAAACUUGAUAAUGUCCUUCUUGG  
>P3618  
CCGCGUGCGGAGGACCCCGAUGGCGGCGCCGGGUGGCGGG  
>P3619  
GGCGGCGACUGGAGAAAUCAAGUUGUGCGGUCGGUGAUGCC  
>P3620  
CUCCGCCGCCUGUCCGGAGCCCGGGUCGCCCGCAGGG  
>P3621  
CGGCAUCGUGGGCGUGGAGACGUGGCAGAGCUGAAGAAGA  
>P3622  
UGUGCACACUGGUGGGGAGAGUCCGACGCGCCUGGCUAGG  
>P3623  
GGUCUGCAGAGGGUCCGGAAGGCGAGCUCGAUGCGGAGCG  
>P3624  
UACCCGGGCCGCGGGUCCCCACGGAGCCCCGAGCAUAACGG  
>P3625  
GCAGCGCCAGCAUGUAGCAGAGGCCGCGAACGUGAACGCC  
>P3626  
GCCACACGGAAGCCAAUGAGAUUAGGGCAUACAGAGGGACA  
>P3627  
GCAUCUGCUUUGUAAGACCUACACGAGGUGCAGGAGUGGUU  
>P3628  
GAACUGCAGCCGCGGCUGGGAGUGGUGCUGCCCGGACGGGG  
>P3629  
UAUGAAACUGCAGAGAAAAAGAAAUGAGCUACUACUGGG  
>P3630  
GACCCUCCUCCCAAGGCUCACCGUCCCCAACAACCCCC  
>P3631  
AACUGGUAAGCCAGCUCCUCACCAAUCCACUCGAGGCUC  
>P3632  
CCUUGCAUGCUGCUUAGCCC AUUCGCAACCCAUUACCCUG  
>P3633  
UCUUGCUUGAUGUCCGCCGACUUGCGAUCUGCCCGGUGGG  
>P3634  
CCUUGAGGAGCGCCUGGGGCACCGCAGAGCUCUGGGACA  
>P3635  
AGGGGAGGGGAAGUCACCGACAACAACAAGCCGAGUCCCC  
>P3636  
GUUGCCCGGCCGGGGACCCGAGCCGAAAAGUUAUCGUCAGA

>P3637  
GGGAGUAGUAGCGGGCGCUGCAGCGCCAGGGCGGCCCGCCGAG  
>P3638  
CUCCGCCGCCUCCUCGGAGCAUUUCGAGAAGCUGCACGAGA  
>P3639  
CUGGCCGCCGCCUCACCUUGCACUGCCGCUUCCGACCGGGAG  
>P3640  
UGGUGACCCGCAGGGGCCCAAGGUGGAAGGCGUUGUCGGCA  
>P3641  
CCAGGCCAGCUCUCCUCUUC AUGCUGGAACCGCCGCCGCCG  
>P3642  
GAACAGUGGUAGUGUCCUGGAUUACUUUCAGAAAGAAGUA  
>P3643  
GGGGCGGCGGCCGAAUGGAGAGAAAGGGCUCGGCGGCCGGG  
>P3644  
GUCGUGGUGCUGCUGCAGGAGGAGGAGGCAGCAAACG  
>P3645  
CUCAGGACACCGGCAGAUC AUCCUCAUCUCCAUCUCCGCC  
>P3646  
GAGUGCGCUCCACUGGUUCGAGAUUUCGCCGUCGCUCGC  
>P3647  
AGACCGAGAUCGGGAUCGAGAGAGAGAUUGACCGGGAUA  
>P3648  
GCUCAGGUUCCUCCAGACCAGCCGCUGUUUUGUUUCCGAU  
>P3649  
GAAGAAGUUGC UUAAGCCUCAAAUCUGAAAUUUUCAAGGAA  
>P3650  
AGCGCUGCCAUGCGGGAUAC AACACUUCGCAGCUGC UUCG  
>P3651  
CGAAUCGCCGUGCGCGGCCUAGCCCCGGAGCAGCCGGUCAC  
>P3652  
UGCCGGUGGCCAGGCCUCGGAAGCCAAGGGAAGGGACAG  
>P3653  
GACUGCGAAGGGGACGGCUGAGCAGGAGGCAGGUAGGGCUG  
>P3654  
UCUCCAUAAUCUCUGUCCCACUCAUUAUCCAAACUUCUAU  
>P3655  
UGCCAGCAGAAUGGAGGAUUAUCUUCAGCUC CCGAUGAUU  
>P3656  
CCCUCGGCUCUCCGCCGUGAUGCUGUCCGAUCCCGCUGU  
>P3657  
CCUGAU AUCAGUGGAUUAUGAAAUUUUGGGAAGGUGCAAG  
>P3658  
GGGAGAGAAGAGCUGGGAUCAAAACUCAUGUGGAAAAAGGU  
>P3659  
AGGUGGAGAGAGUGGUAAAAAGAAAUGAAAUUGACAAGCU  
>P3660  
CAAAGAUC AUCGGCUUGACUAGGCCCUUUGCCUGAACCUC

>P3661  
CCUGUCCUUCUCAUCACUCACAUCAUCUUCACUAUUGAGG  
>P3662  
CUCCUUGGCGCGGGGUGGGGAGCGGGCAACGCCCCCGGAC  
>P3663  
GGACCAUGACCACCACUCUGACUUUGACCCUGGAGGAGAAA  
>P3664  
GCGCCUACAGCGACCCCGAGACCAAGGGCAACAGGGAACUC  
>P3665  
CUCACGGUCCCGCCGGCGCCACCACCGCGGUCACUCACCGC  
>P3666  
ACAUAAGUAAAUGCUGCUGCACUGGCUAACAGAUACAAUCC  
>P3667  
CUUCAUCUGGGCCACGCCAGACAACAGGCCUUGGAAAGGGU  
>P3668  
GCUACCAGAGCCUGCAGUCCAUGAUGAAGACCGAGGGACCC  
>P3669  
AGCAGCGGGGUGGCGGAGGAGGCCUCAUGGAGGAAAUGAA  
>P3670  
CCGGGCUCCGCGCCAGGAGGAGCGGCCAGGCCAGCCCCGG  
>P3671  
AGAAAGAGGGGAAGAGUAUUAAAGACCAUUUCUGGCUGGGC  
>P3672  
GUGAUCUGAUAGAGCUGGAGAACCGCAGGGCCCAACAGAC  
>P3673  
UCAGCGGAGCCCGAGGACGCAGCCGGGUCCAGGCAGGGGCU  
>P3674  
GCCGCCCGCCGAGCAGCGGGGAGGGGCUGUCCAGCGACGUC  
>P3675  
GCGCUGUGUGGAGGCCCGCGAGCUGAAAUUCGCGGUGCGAC  
>P3676  
UGACCCUCGCAUUGUGCAGAAUUAAGUGCAGUAAAUGUC  
>P3677  
GCUCCUGCUGCCGGGGCUCCACACGUGCCUCCGCGACGCGC  
>P3678  
GCAGGCAUCGCUGACCAUAUAAGGUGCCUCUGGCCUCCUG  
>P3679  
GCGUCCGGAGCGAGUUGACAGCCGCGGCAGGCGAAGGCGC  
>P3680  
GCGGGGGCGGCUGCAGCAGGAGGCGGCGGCGACCGGCUCCC  
>P3681  
GGCCCACGAACCUUGGCCUGACCCUCAGCUCGUCCCCAGCU  
>P3682  
GGAUUGAGCCGGGAGGGUGAAGGCGAGGGACUGCAGAGCCU  
>P3683  
CUUCUUUGCUGGCUGCGUAGACACCAGAGGCCUCAACCUGC  
>P3684  
CACAGAGGACGAGGAGCUGGAGCCGCGGCCAGCCACCUGA

>P3685  
CUGGCACAAGUUCUGCCUCAAGUGCGAGCGCUGCAGCAAGA  
>P3686  
CAGGCAGCACCAACUCCUACAGGAUGGGGAAAGAAGGAAAU  
>P3687  
AGGCGAGCCUGGGCAGCCAAACACAAAGAUUCAGAGGGCAU  
>P3688  
ACUCCCAGGGCCCGCCAGGACCCCAAGCCGCGCGGACG  
>P3689  
GAGAAUAAAGGGUGGUUUUACGAGGAAUGAGAGUGAAUA  
>P3690  
CCAUUUCGGGGUGCCAAAGCAGCCAUGGAAGAGCCUGCAGC  
>P3691  
GUCCCACUGGACUCUUAUCCAUCCGUCCUCUCCAGCUCAC  
>P3692  
CGAAAGAGCCUUGGGGGCACAUUCGGGGUGCGGUGACCCG  
>P3693  
GCCGGCACCUGCCGCGGAGACAUGUUGCAAAAACCGAGGA  
>P3694  
CCGAGCGGAGUUCAAAUUUGAGAGCGUUUGGAAAUUGGAAG  
>P3695  
GGGAAGGAGGACGCGAGGGCAGCCAGGCCCUAGGGAGCAGG  
>P3696  
GGCCUCCGCGAGCGCCGCGGAGCCCCGGCCACGGCCACGG  
>P3697  
AAGUUUCAUGAGAUUGAUAUUGUCGAUUUUUUGUUAUC  
>P3698  
UAGCUCGGUUGGCAAACUGGAUAUUUAUGCACCUCCAUUUC  
>P3699  
CUCCACUCCAGUGGAAACUAAGGACCGCUCUGGGCAGCGG  
>P3700  
CCCUCCAAGCGGUGCGGACAAGGGGCCACCCGAGAGUCUU  
>P3701  
UGAAUAUCAUCUUUGAAGUAACACCAUGUUAGACUCCUG  
>P3702  
AGUGGGAGAGCUGGUCAGGGAUGGGAUGGAGUGAAGGGGGC  
>P3703  
ACAAUGAGCGGGACUCUGACAAGAAAGUGAGGACGGGGAA  
>P3704  
GGGUCUGCAGAGCUGAGAUCAGCCGGCCAAGUCCUGGGCC  
>P3705  
GGCCUAUCCCUGUGCCAGGCACCAUGAAGCAGGAGUCUGCA  
>P3706  
CGAUUGACCAAGCUUCUUUUACGACCUCCAUGGAGUGGGAU  
>P3707  
ACCGAAGCCAGGGGAGUCCGAGGUGGACCUGCUCACUUC  
>P3708  
CCUUUCCCUCACCCCUAAUUACUGCCCUUUUACAUCUAAC

>P3709  
GGAGCCCCUGAUGAGAGUGGAGCUGAAAAAAGAAGCAGGGU  
>P3710  
GCAGAAGAAUGACAGGCAACACCUGAAGCCACGCAGCCGCC  
>P3711  
UCACUCCGGGCCCUGCGGAAAGAAUUCGUACCGUCCUGUU  
>P3712  
ACCGCGCCUGCCCGACGCUCACGGCUCCGGGGGCCAUGGC  
>P3713  
GACCAGAGCGGCCUCCGGAGAGCCACGGAAACAUGACAGC  
>P3714  
AGCUGGCCUUUUAGAUAUUCAUAAGCUGUCUUGGAGACACA  
>P3715  
GGCAGCGACGGUGAUUCCCGAACUUGACUAAUCCAAACA  
>P3716  
GCUGUUUUUAUUAAAACUGUAGUCUGUGCUGGUCUCAGAGA  
>P3717  
GAGAAGCUUCCGUGUUCUCAGCCUCAUCUUUAUGGGUGC  
>P3718  
UGCUCGCUCAGCGAUGCAAACGCGCGAGGCGCACGGCAG  
>P3719  
AAAUGAAAUACAGAGAAGCACAAAAAGCAAAGAAGAAA  
>P3720  
AAAAGCAGAAGAUGAUGAUAAAGCAAUAAAAAGCAUAAGA  
>P3721  
GUCAGAUGAUGAAAAGAUACAAAUUCUGAUGAUGAGGAGA  
>P3722  
CCUCAAGGGCAAGCUGGAGGAGGAGCGAGCCAAGCUGCACG  
>P3723  
GCGGAGGGCUCGGGAGGCGCAGGGGACUGGAAGAGUUGGCU  
>P3724  
UUUUCUUCUCCAUCUCCUCACGUUUCUUUUUCUCCAGAG  
>P3725  
GAUCCGGAGGGAGAAGCUGAAGGGGCUUGGUCCGGAGCCUC  
>P3726  
GCAGCACUUACCGUGAUCCACCUCCGGUCUGUGAUGAC  
>P3727  
AAGACUACAGAAGGAAAGAGAUCUUGCCUUUUGAAAAGAUG  
>P3728  
CGGAGCGGACAGAAGCCGCCACGAGCCCGGCAGGAGGUCC  
>P3729  
CACCACACACGCUCCACCCCACUCCUCACAUUGUCGCGCGC  
>P3730  
AGACACUGGGCAGACAAUGAACCCUUUGUAACACAUGAGG  
>P3731  
GCUGGUGCACUGGUGCACCCAGCAGUUGCGGAAGACUUUCG  
>P3732  
GGCAGCGGCGGUGGCGGACAGCCGAAAGGAGCAGGAGGCG

>P3733  
UCCGCAGUUUCAAAUAUCUCAACACCCAGCUGUUCUGUUUC  
>P3734  
AAUGAUGAGAAAGGUGUAGAAGAUGGAGGGGGAAGUGAUGG  
>P3735  
CCCGGCGUCCCGUCGAGCCCAGCCCCGCCGGGGGCGCUCCU  
>P3736  
AAGCAGCAGAGGGGGAAGAUAAAAGCCACCGACCUCAUGGU  
>P3737  
UGCUCAGGUAGUGGAAGACGAGGAGGACGAGGAUGAGGAGG  
>P3738  
GGUUCGGGGUUUAUUGAUUGAAUUCGCCGGCGCGGGAGCC  
>P3739  
AGAAGAAAUAAGCGAUUACAGAAGGAACUAGUAUGUGUG  
>P3740  
CCCAUAUAUCUACCACUGCAGACAGACACUGCACACACGC  
>P3741  
AUGGAAGAGGAGGAGGUCCACAGUCGGAACAUGAAGGGA  
>P3742  
GGAGGUGGCUGUGGAAGGUAAGUAUAGACCUACAUCUCUGU  
>P3743  
GCAUGGGGAGGACGGGCCCGAGAGCGCCGCUCCUCCCCAAA  
>P3744  
GACCUGGGCAUGGGUGGUGUAUGUGCCAUGUGCAGCUCCA  
>P3745  
UCUCAAGAUCUGAACAGCACAGCUGCCCCACACCCCCGCCU  
>P3746  
CUGCCGCCAGCCCGCCGGGAUGCAGUCCGGGCCGCGGCC  
>P3747  
AGAAUUGUUAAUGAAGAGGAAGAACAAGAAGCCCGAAUUG  
>P3748  
AAAACGAGGGCAGACGCAGCAGAGGGGCCGCUCCGCGCCAC  
>P3749  
CACCUAACGGCGCAGGAGAUAGAGGCGGGCUCGAGGUGAUU  
>P3750  
UGCCGAGGAGCGGCUACGCCAGUCCCGGUACUGAGCCAGA  
>P3751  
GCUGCUGGGGGCGGGGCUAAGCUCUGGCAACCGCCUUGGG  
>P3752  
GGAGAGGCUACGUGAACAGGAGGAGAGGCUACGUGAACAGG  
>P3753  
CCGCAGAGUCUCCUGCUGCCACAGCCUCUCAUCCUGUUGCC  
>P3754  
UACGUGCAGAGCUGUCGCGGAGCCGGAACAGCAGCGGUGAA  
>P3755  
GUACGGUCGUGACAAGUCACAGCGAACUUGCCCUCGCGCC  
>P3756  
GACACUGAGAAGCCCAGGAGAGGUGGCCUCUGGUCCACUAC



>P3757  
UGUUCACACAGCCUCUCCUC AUGUUCACGUAGCCUCUCCUC  
>P3758  
GUGGGACUGGGGCUCCAGCU ACUGGUCUGGCUGCUGCUGCA  
>P3759  
CCAGCUCCCGCAGCCUCUCC AGCUCCCGCAGCCUCUCCAGC  
>P3760  
AGACUGAGGUCCAAGGCUUG AGCCUAAGUGAUUGCCCCAG  
>P3761  
UCCCAAGGUUGACGUGAGGA AUCAAUGAGAUCAUCUGUGUU  
>P3762  
UAGAGAGAAUGGACUGGAAG AAUGUGCCGGUGAGCCUUUGU  
>P3763  
UGUCUGGGGCAAGUCCAGG ACCGCAGGAACCGCGACCCCG  
>P3764  
GCCGGAUGAACUUGUCGUAC AGCACAGCACCGUGGACGUUC  
>P3765  
CUCCGCCACAAACUCCAAA AAGCCCGCUCAACCCAACGCC  
>P3766  
CCUGUCUCUGCUCUCCUGUC AGUGAAAUGGGUUUGACCAUG  
>P3767  
AUGGGAGAGCCCGAGCCACC AGGCCCGACGUCUACCAGCU  
>P3768  
GCAUUCGGAGAGCAGGAGCG ACGGUGUCCCGCGGCUCGGGC  
>P3769  
CCCAAGGGCGGAAGUGAGAA AGUUGUCUGCGUCUCGAGGCG  
>P3770  
CAACCUCGUCUGCGGCGGAC AUGGCGGACGAGCCCGAGUCU  
>P3771  
CCCCGUAGUCUCCACAUUUG AACAGCUCAUUGCCCUCCUUC  
>P3772  
CGAGAGCAACAACCACCCGC AACACCGGCGAUGUCACUCC  
>P3773  
CUUUGUCUUUCCUAGAACUC AUUUGUUUCUCCUUGUUCUCC  
>P3774  
ACUCGCCGGCGGGCGGGGAG AAAUGAUAAAAGAGAGAGAGG  
>P3775  
GAGUUUUCGUCCCAUUCAA AGUGGAGGAGGUCGAAGAUGU  
>P3776  
CGCAGCCCGGGCCCGCCACC AGCGCUUCGCGCCCGCCGGAG  
>P3777  
UAGGGCGCCUCGGGCCAGGG AGCGCGGAGGAGCCAUGGCCA  
>P3778  
CGGGCAGGCGGCGGCUUCCC AGGCCGGCGGGGCGCGGGCG  
>P3779  
AAGUUACAAAGGAAAUGCAA AGAAGCCCCAGGUGACUGGAG  
>P3780  
AGGGCCGGCCGCGCGGACAG AGACUCCUCUUGGCGUCCAU

>P3781  
CUGAUCGUGGAGGAGGGACAACGCUGCCACCGCUUCUCCUG  
>P3782  
GGCGCAAGAGGAAGAUGAGGACGAAGAAGAGGCGCUGCCGC  
>P3783  
CCCACACCUGAGUCCCGUUCACGACUCCCCAGCCCUACUCC  
>P3784  
CCUCUCCUCUCUCCUCCUCAAGCGAUCCUGAUUUCUCUUCU  
>P3785  
ACGGAGGGGGACGGGAACGAGAGGGGCGAGGACGUUCAG  
>P3786  
GGAGGACGUCCUCGAUGUGGACUCCUGCUGGUGCAUCUGGU  
>P3787  
UGCAGCCUCCCACCUCUUCAUCCAAGACCCACCAUGCCA  
>P3788  
AGCGCCAGCACCGAGGUGCCAGGUGCCUCGGAGGAUGCGGA  
>P3789  
AGGCAGGCGGGGCGGGCAAGCAGCAGCAGCAGCAGCGGC  
>P3790  
GGGUUCUUGCUGACGGAGGUAGUUGGUCCUGCGUGGGGGAU  
>P3791  
GACGCUCAAUGUUGCCUUCAGACAGGGCGUGCAGGACCGG  
>P3792  
CCAAAGACCGGGGCGCCAAAGGGGCAGAGGGUGGUGGAGA  
>P3793  
CUCCUCGGGCUCCUGCCGGCAGUGGCACCAGGUGCCCAGCA  
>P3794  
GAAGCUCGAGCGGCGGCCAUGGCCCGAGGUAGCGCGCGG  
>P3795  
CCUCCGAGGGGUGUCAGGGGAAACAGGCCACCGCCAAAGCC  
>P3796  
GCUCUCUGUCCGCGGUCACAGCAGACGGGAGUGGCCGGCC  
>P3797  
UGCCUGGCUCCACACAGCCAUUGCAUUGUCACUCUGCCUCC  
>P3798  
CCGUGCCC GGCGCCGGCUCCAGCCGCGCGCCCGCGCGCUGG  
>P3799  
CCACUUCAGCCCCACUCCACCAUCCUGUGAGCCCCACUC  
>P3800  
GAAAGGAAUCAAGAAACGGCAGAGAGACUGAGGGUUGCAGA  
>P3801  
CAAACGCGUUGGGCUCCUCCACCACCUUCAUCUUCGCUGCA  
>P3802  
GGCGGGCUGCACUCAGGACGAGUGCCAGGCCUGCUGUUC  
>P3803  
GACGAGGGCACCAUGAAGGUAGAGGUGCUGCCUGCCUGAC  
>P3804  
UGUCUGUUGCGCAGGUGCCUAGGCCGCGCUGCCGGGCUCG

>P3805  
CCGGGACCCUAGCAGGUUUCAGCUGGAGCGGCGGGCGGC  
>P3806  
AUGGAGUGAUGUGGCUUUGAAGGGUCCUCUGGCUGCUGAGC  
>P3807  
UCCUCAGAGACGUCUCCCACACCUGCUCCGGGCGCUGGAC  
>P3808  
GCCGCCACCGCCGCAACUGCACCCUCGCCCUCUCCCGCCC  
>P3809  
AAAGGACACUGCCCAGCAACAGCAAGGGCACGGCCUGGCCA  
>P3810  
CCCGUCCGCGUUCACUCACAACUCCCCCGUCCAGGCGCCGG  
>P3811  
ACACCCAACUCAGGAGCAGAAAGCAAACCCUGACUGUCC  
>P3812  
CCCGGGGCGUCGGCAGCCGAUCCCGUUGUACAUGGCCCCG  
>P3813  
CUCGGGAGACUUAGGUGGUGAACGGUCCCGAGUUGGAGAGG  
>P3814  
GGGGCCUCCUCUCCCGCGACAGCGCCGCGGCGGAUCCUU  
>P3815  
UGUGAGCAGCACCAGUUUGGAGAACUCCUGGGCUUCCUGG  
>P3816  
CCCAGGGCCUCUGCCCUAGAGGCGUCUCUCUGUCCUGUC  
>P3817  
CCUUCUCUCCUGCCAGCUUGAAGCCUCCACCUUUGACCCC  
>P3818  
UGAGCCAGAU CGCACCCCGGAUGCAGCUCCGCCAGACCCCA  
>P3819  
CGCCACGCUUCUCACCCUAUAUAGAGGACCCACGCAAGACU  
>P3820  
CUUUCUGUCCUUCUUCUCGGAACAUAUACGUCCCCUGGGG  
>P3821  
GGGCGGUGCUGAGGUAGGAGAAGGCAGACUCUGCUGAGGCA  
>P3822  
GUUUCUUUUAUCCACUUCUAUUGGUUCUGAUUUCUGCUCU  
>P3823  
GUAGCACUGGGCACUGAGCCAGGAGUCGGGGUGGGAGUCUG  
>P3824  
UCCUGGCCCCGCGGCCGGGAUCAAGCGUGGUCGGCGGGUC  
>P3825  
CGGGGAUGGAGCUGCGCGCUAGGCGCCAACUCCUCCCCGC  
>P3826  
CUGACUGGAGGCUGGCGGACAGGCGACAGCGACCUGCGGCA  
>P3827  
CUUUCUGGCCAAGGAGGAUAUCGGCCGAGUUUCCCCUAG  
>P3828  
GCUUGUGGAGCAGGAGCGAAAGUACCGGGUGCCGAGGAGC

>P3829  
CGCCAGGAAGCGGCGCUCGAACUCUGCAGCAAGAGUUCGG  
>P3830  
AGCUUCAGUCGGGCUGCUGGACACCCUCGGAGCCGUGAGC  
>P3831  
UGCGAGGCCUCGCGAGCGCCAGGGAGGCGCCACGAGGGAGC  
>P3832  
UGGUCCGGCAUGAGACCGUGAGACGAGAGACGGGUCGGGGC  
>P3833  
GGCCAGGCAUGGGAGCUGGAGGUGUGGGGUAAUAACUGUU  
>P3834  
GCUGGAACUGCUCGACACUGACGGGCUAGUAGUGUGCGCCC  
>P3835  
UUCGGCGAGUAGAACCGCUGAGGCGGGCGCGGGCCCGGGUG  
>P3836  
AGAUGAAAGGAUGUUGAAUCACUUUGCAUGGCUGUAUGAUG  
>P3837  
UUGUCUAAAGUCAUUCUGAACUCGCGAAAUCUGACACUGGU  
>P3838  
AGGCGCCCCGGCCUUAUUCAGCCUGGGGAGCGCCUCGGUG  
>P3839  
CUAAGGCCUCCGCAAAGAAAAGAUGAAGUCCAAAAGAAG  
>P3840  
AGAGGGGCAAGGAGGGAACGAGUGGAAGAUUGCGUCACGAC  
>P3841  
UCAGGCACAGCCAGCCCGCCAGCAGUCUCAUCGGGGGCCGC  
>P3842  
AGUGAUCCAGGAAGGGCGCAGGGGCCGUUGGGACGAUCC  
>P3843  
GGUGACUAUGGAGGAGGAAUAUGGGCUCGUGUAAAGGAGA  
>P3844  
GGCCAAGCGCCGCCCGCCAGAGAAGCGCGAGUCGCCGCCCG  
>P3845  
GAAGGUGUCUUGAGAUUAUCAUCUGCUGAGGGUGGAAGCGG  
>P3846  
AGACCAAGCAUGUCGGAACAGGAUUGGUCAGCUAUCCAGA  
>P3847  
GAGCGGCCGGAAGUAGCCGGAUUCUCUGAAAGACUGACCGA  
>P3848  
AAGGAGGCUCGCGAGCCUCAAGCCCUCGCGAGCGCCGCGGG  
>P3849  
GCAGUUUGAGGUGGACCGAGAGCCCUCGCUGGACCGAAACC  
>P3850  
UUUCUCUCGUGAGCAGGACCAGCUUCUCUCGGCCUUUCGCA  
>P3851  
UCCCGCUGACUGAGUCUCUGAGGGGCUACCAGGAAAGCGCC  
>P3852  
AUCAUCCGCAGACUCCGAAAAGGGUUCGAGGAACGCGCCU

>P3853  
GUCGGCGGGCGCCUGUGGGACAGCCCUGCCUCCAAGACCC  
>P3854  
GCAA AUGGUGAGGCCGAGUCAGGUGAGCUCAGCCGGCUUCG  
>P3855  
UGCGGCAUUGUGGAUGGAACAGCGGGAGCAAGUGAUCCC  
>P3856  
AAGAGGGAAAGGGGGAGGAGAGGGACGGGCCACUCUUCUCG  
>P3857  
GGAUGAGGAGAAGGUCUCACACCAGGCUGGGGACCACUGGC  
>P3858  
GGGCGCGGUCCAUGCUCCCGACGGCUGCGGGCUUCAGCAUC  
>P3859  
AGGUGAGCACCGUGCCCCGGAUCAGGUCCCCGUGGGGAUGCC  
>P3860  
CUGACUCCUACGAGGAAAAAAAAAAAAAAAAAAAAAACAAU  
>P3861  
AUGCAGGAGGGGAGCACACAGUCACCUCUCACAGCUCCAU  
>P3862  
GAGAAAGAAGAGGAUGAGGAAAGGGGGAUUGGAAACCCAG  
>P3863  
CUGAAGGGGAAACCCUGUUGAGGAGGCAGGGAGAGGCUGG  
>P3864  
CACCCCGGCCUGGGCUGCCAAGGUCCGGGCUGGGCACAGUG  
>P3865  
GAAACAGGAGAAGGAGCGGGAGAAGGAGCGGCAGAAGCAGG  
>P3866  
GACGGCGCGGCGGGGCCACCAGGGGCGCCUGCCCGUCUC  
>P3867  
CCACCUGCCAGGCCGCACCUACAGCUGCCCCGACUGCGGCA  
>P3868  
AGCCCCGAAGGCCACUAGAGGGGAUGGAAACUAAGGGCC  
>P3869  
GGGAUCUACGCUGAGUUCGGAUGAUGCUCAGCUCGGGCCGC  
>P3870  
CCCCUGGCCAGGUACCUAGCACCUGGCCACCUGCUCCACCC  
>P3871  
GGCGGGCGGCGGCGGCGACGACGAGGACGAGGAGCCGCGCG  
>P3872  
CAUCACCCUACACCCACCAC AUGCUUUGGAGUCAGCCAUC  
>P3873  
GGCGCCCGGGCCUGGCGCGGAGCCUGAGCCCGCCGGACGGG  
>P3874  
GAAGCGGUGGCUCUCUGUCAGCUUCCAUCGCUCCCCAAG  
>P3875  
GGGUGCCCAGACUGGCCUGGAGGGGCCUCUUCUUUCGUCC  
>P3876  
UGCACUUGUUGAUGAGCUCCACGAAUUGCUGGGACAGGACC

>P3877  
CAUGACGGUGGAGCAUGUGGAAUGCCAAGAUGCUGGUGUCC  
>P3878  
AUGGCGGUUCCAGGAGGUCCAGCCUCCACCUGGCCACCCA  
>P3879  
UUUUUUAGGUUUUGUCCAAGAUGAAGAUUCAUGCAGUGAUU  
>P3880  
CCCAGGCGCCGAGGCUGGCAGCGUGGUUCUGGGUAAGUGG  
>P3881  
AGAGAGAAGAUAAAUUCUACAGUAAAUAAGAUUUAGAAAA  
>P3882  
UGUCUGCAACUCGAGCCAAGAAGUGAGAUGGCCACCAA  
>P3883  
AAAAUAUCAUCAUGCCACCACCUCCGCCGUGCCUCCCCG  
>P3884  
CUCAGGUCCUGCGGCCCGCC AUGCCCGAGCCCCACAGUGGG  
>P3885  
GGAGGCGACUGGGGAUCUGGAUGGGGCUCACUGAUGACAUG  
>P3886  
CUCGUCGCCAACCCCCGCCACCGCGGGCAGCGCCACCGCC  
>P3887  
AAGCGGAAAAAGAGAAAGAAAGGAGAGAAGCAGAUUCCAGG  
>P3888  
AGGAGCUCUGCAUUGAAGGCACUGGGGUGAGGCUUACUGCC  
>P3889  
AGUCCUCCUCAGCCCUCCCCAAGUCGCUUCUGUGGCACCCC  
>P3890  
GGGAGGAGGAGCCACCUGCAGAGAUGGAAAGAGCAGGCG  
>P3891  
CGCUGCUCUGAGCCUGGGCACGCGGAACGGGAGGGAGUCU  
>P3892  
GAGGAGCCGGAGACCAGGCACCUGGGCAUCCUCCCCUCG  
>P3893  
CGCGCCUCCAGCAGUCCUCAGACUCCUCUGGCAUGCUCUU  
>P3894  
GAAUGAGCGACUGAGGCAGGAGAUGCGGCGCUGUGAGGCCG  
>P3895  
GGGGGCGGCGCGGGGCGCAGAGGGUGGCGGCGGCGCGG  
>P3896  
GCCGGAGUCGGGACCCAGGAGUUUCCUGUGUCCAGCGCUG  
>P3897  
GCAGCUUCCCAGCUGCGCC AUGGCCGCGCCUGCCGCGCGG  
>P3898  
CGGAGCGGAGGGAGGAGAAAAGGAUCCAGUCUAGCGAUC  
>P3899  
AGGAGGAGCCUGAGGAGGAGACAGGACAGAGCGUCUGGAGA  
>P3900  
GACUUACCAGAGACGCCGGGAGGGGGCCAGGAAGAAGAUG

>P3901  
CUCCAGUCCACGAGCCGGGCAGCUGCUUGAGGUGAGCCCC  
>P3902  
CUCCCUCGCCCCGGCACCCUGACCCUGGCGUGCCCGCCACUC  
>P3903  
GCAUGGAUAUGAUCUCCAAACGUCCUGGUCAGACAUGGCU  
>P3904  
GGAGCUGAGCCGGCGCUUGCAGCGCCUGUAUCCCGCGGUCA  
>P3905  
CCUCCAUUUCACUCACACUCACACCUUCUUCUCCAUCUUU  
>P3906  
GUCUCGCCCCGUGGCGGGUGAGCGAGGGUGCGUGGUGCGCG  
>P3907  
CAUCCUGGCGGCGCCGGGCCACUGGGAGGUAACGGGCUGGG  
>P3908  
UGAAGAUGACGAGAACAGUGAGAAUAACUGGCGCAAUGAGU  
>P3909  
GUCGCUCCGGAGGCGUUUACAGCGAGCACAAGAGCCUCCG  
>P3910  
GGCCCGCCCGCUACUGCGGGACGCCCGCCUGCCAGCUGCCC  
>P3911  
CGGCAGCGAUGGGAAAGGGCAGGAAGUCGAGACCUCAGUCA  
>P3912  
GGCCUGGAAUAUCUCUGGAUAUGAGCUUCUUCCAUUUCC  
>P3913  
CAUCUUCACUGCCUCCUUCAAGUUUUUCCCAUUUCAGCUA  
>P3914  
UAGAGUAGAGUCCAUCUUGAAGUCACCCCAAAGAACUAAU  
>P3915  
UCCACCAGCACGAGCGUCCCACCCGCGCCUGGGACCAUGGC  
>P3916  
CUCGGCGAAGCACUUCGUCAGCCUCGGGCGGAGGAUCGUC  
>P3917  
GCUCACAGUAAUCCCUGGCAGGUUCCCCUUCACAUGUCGG  
>P3918  
CGGGCCAGCUGCCAACCCUGAGUGGAUGCGGCCCUUCUCAU  
>P3919  
UAGCCAGUCUCUUUCGAGACCAAACCUACUUCUCCUAU  
>P3920  
AAGCUGAGCGCUUAAGAGUGAAUUUGAGAUUAGUCAUAAU  
>P3921  
AAGGAGCAUGGCGUGGAGACACCUGAAAGUGAGUCCCGCGA  
>P3922  
CUCAAGGAGCCAAAUCCACACCUUGAAAGCGGCCAUUAUU  
>P3923  
ACUCCUCCGAGGACUACGUGAGGAGGCGGGAGCAGCACCUG  
>P3924  
GGAGGAGAUGGCGCUGGCCGAGGAGCAGCUGCGAGCCCGGC

>P3925  
GGUCAUCAAAAGAAAAGGAAAAGAAAGCCAGAGAGAGAGGG  
>P3926  
GCCAGCUCCGGCAUCGCGACACACCCCGCUCGCCAGGCCUG  
>P3927  
GCUGGUAGGUGUUGGGGAGCAUGGGCGUGUACUGGGAGGCC  
>P3928  
GACCCUCGCGGGGCCUCUGAGCGGCGCGGGCGGACCCGAG  
>P3929  
AACAGAAAGAGCUCAGUGAGAACAGCUAAGCCAAGCCACU  
>P3930  
CGCGCGGGGUCUCGUUUGGAGCGGGAGUGAGUUCUGAGC  
>P3931  
GCGGCCCGCGGGGGCGACGCAGCAGCCCGCUGUCCCCGCGC  
>P3932  
GCGGUACCUGCAGGCCGGCAAGUCUUCCAAACCGGUCCCG  
>P3933  
CGUUUCAUUGGGACUCCGCGAUCCUCCGGCUGCUCACGCUG  
>P3934  
GGCUGAUACAUGCUGGAGCCACCGUCGCCCAGUGUUUGUCU  
>P3935  
CGGCCGCGGGCUGGCGGGGGACCCUUCAGGCCCGGCCCGU  
>P3936  
CAUAUGGCUUCUUAUGGCUGACGCGCCCUUCACACACACA  
>P3937  
UGACGCCACGGGCGUGCUCAGGAGGCAGGCUCGCCGGGG  
>P3938  
GCCGUCUGAGCCGAGGCCACCAGGCUGCGGAACAUAGCC  
>P3939  
GGUGGGCGAGGACUACGGGGAGCCGGCGCCUGAGGAGCCGC  
>P3940  
GCCUGUGCGUGCACCUGAAUACCACGCCUGGGGUGGGGAAG  
>P3941  
CCAAACUGAAGGAGAAAUUCAGGACGGUGCAGAGAAAGAA  
>P3942  
UUGUCUCUCCCCGCGUCGGCAGCCCCUCGGUCCUUUCUCCU  
>P3943  
GCUUGCUGGCUCGCUCCCUCACCUCCUCCCCGCAUCGCCA  
>P3944  
GUCUGGGUGUCCCCGGGCCCGAUCUGGAAUGGAAACACAUG  
>P3945  
CUGGCGCUCCAAGAUUGAGGAGUUGGGUGGAGGAGUGGCAG  
>P3946  
GCGGAUCCAGCGCAGCCGGGAGACAGAUGCAGGCGGGCGGU  
>P3947  
CCAGCAGCACGAAUCCUGCACCCCCACCCGGUCACGGGCG  
>P3948  
AAAUGAAACGGGUGGUGGCGAGGCGUGGAGGUCCUGGUGA



>P3949  
GAUUCUCCGGAUAUGGCCGGAGUGUUUCCUUAUCGAGGGCC  
>P3950  
UCUUCAGGAUCUCAGGGGGGAUCUGAUUGGCCACGCGGCC  
>P3951  
UGAAGGCAGCGGAGGCGAGGAUGACAUCAGGGAGCUUCGGG  
>P3952  
AAAAGGAAAGAGGAUGGGAAAGGGGAGGGGGUGAGGGAAA  
>P3953  
GCGCCCCGAGCCUGCCGGACACCCCGGGCUGCAGCUGAG  
>P3954  
UGUUAGGACACGAGCAGAAGUAUGAAAACAAGGCUGGCAG  
>P3955  
CAGAAGAAGCUGGCGGAGACAGAGAAGCGCUGCGCUCUCUU  
>P3956  
GGUCAUCAGCUGUUCGGGAAGCCUGAUCCACGUCCCCGU  
>P3957  
GGGAGGUAGAAGAAGGUGCACCUCCACCCCAACCCUGCC  
>P3958  
GUGGGCUCCAUGCCCUCAGCAGGCCCAUGCCUUCAGCAGG  
>P3959  
GGGAAGAGGCGAGAGCGCGGAGGGCGCGUGCGCAUUGGC  
>P3960  
CCGCGGCGCCCGGAUCGGGGAAGUGAAAGUGCCUCGGAGGA  
>P3961  
GGAGAAGCGGCGACGGCGGCAGUGGAGUAACCGAGCCGGAG  
>P3962  
GCAUCCAGCUUAAGGACCACAUUGACCGAUCCCGGAAGAAG  
>P3963  
GCUCCUCCUUCUGCUCCUCUAUGCGCCGCUGCCGCUGGUGC  
>P3964  
UCGUCCAGCGAGGAGGUGGAAGCAGUGAGGACGACGAGGA  
>P3965  
CUCCAUCCAAACCUCAGCGAAGACAUCCAGGUCGGGUGA  
>P3966  
AGGAUCUGGGGCCGGUUCGGAGCUGCCCCCGCCCCUCGCCG  
>P3967  
UGAGGCCUGGCCGCCUCAAGAUGCGGGAGCUGUGUCGCA  
>P3968  
CUAGGAGCCGCGACCCAGUGAUAGCGGCCGUGGAGGGGCC  
>P3969  
CGGUUGACGCCUCCUCCGCCAGCUGAGCCCGCGGGAGCCCA  
>P3970  
GCACACACAGGCUUCCGCCACCUCCUUAAACCGCCGCUG  
>P3971  
AGACAGGAAGGCAGAGAGAGAGAGAGAGAGAAAGGAAGA  
>P3972  
GCUGUGUCCCGUAUCUCAAUAAAGAGAAUCUGCUCUCUUA

>P3973  
CACUCGGGCGUCCUCCACCAUUAAGACCUAACAUAGUCUG  
>P3974  
CCUCGGGUCACAGCGUGUGGAGGUCAUGACUGCGACGGCUC  
>P3975  
GCCGGCCCCCGCCGCGCCUGCCACCUGCCUCCGAGCCCGAG  
>P3976  
ACGCGGCCAGAAAGCGUUGGAAUCCUGAAUUGAGACGGCUG  
>P3977  
AGGAGGAAGUGGCAGCUUGGAGGCUGCCCCCAAGAUGGAGU  
>P3978  
CCUGGAAUCAGAUGGGCCCAACAUGACAGAGAAUGGCCUGG  
>P3979  
GAUCCAGGAGAUUGUGGAUAAAUCUGGUGUGGUGAGGGUUC  
>P3980  
GCGGGAGCCGGGCCGGCCCCACGGCGGCCUCCACAGCCA  
>P3981  
CGCUCGGCAAGCUCCAGAGAUCUGGCCAAUCACAGGACUU  
>P3982  
CCGGACCGGGUCGGAAACGAAGAAGGAAGCACCGAGAAAA  
>P3983  
GUUUUAUUUUGAGUGGUGCCAUUUUUCUUUCCCCGAAGCUUC  
>P3984  
UGCCCUCUGGAGCCCGGUCAAGCUCAGGAUCAAGGCAGACG  
>P3985  
GUACCGUGGGGACAGAGAGAAGUCAGGUGGGUGCAUGGCCU  
>P3986  
CAAGGAAAGCAGCGACGCUGACGGAGAGGCGGAGGAAGAAG  
>P3987  
CGCUACACCAGCCUUCGGCCAGGGCCUCCACUCAAUCCCC  
>P3988  
UCUUCUUCUAGGGCAGCCCGAAGAGUCUCCAACUCUCGAUG  
>P3989  
ACCUCUCAGCCAUUCUUUCAGCCCCACUCCCCUGGAUCC  
>P3990  
UCAGGUCUGCUACCGCUGCCACGGCCCCCCCUGCUGCCCCG  
>P3991  
AGGGUGCUCAGGCCAGAUGGAGCCUGAGAAGGAGCAGGGGG  
>P3992  
GACGAGAUGUGGGCGCAUGUACGUAGGAAUAAAUUCAUCC  
>P3993  
AGCCUCCUGCAGCGCUGGUCAGGUAACCUAUUCCUUGAAGA  
>P3994  
AAUGCCCAUAACCCAGCCUCAGACCCAUGGAGCCCACGAGA  
>P3995  
AAGCAGAAGAGAUGAGGGCAAGACUUGCUGCUAAAAGCAG  
>P3996  
CGUCUCCUCUCCGCAUCAAACAGUGAAACAUCUUCAGUGU

>P3997  
CUGCCGCAGCGGGCCUCGAGACCAGGCGAGCGCUGCGGGA  
>P3998  
AGCCGUCCUCCCUGCUCCCGACUCUUCAUUCGUUCUGAGGA  
>P3999  
CCAUGUCGGCAGCCAAGGAGACCCGUGCAGGAAAUUCCAG  
>P4000  
CCCCAAGCCCACGGCAGGGAUGUCACCCGGGGUGGCGAGG  
>P4001  
CCGCUCGGGCCCGCCGGGGAAAACAUGGCGUCUGCCCUGG  
>P4002  
GCCAACGGCCUGGACGCCCCAGGGCGGGCGCAGAUCGCGG  
>P4003  
AGAUCUUCUCUAAGAUCCCC AUGGUAGCAGCAGAGGUGGGC  
>P4004  
CCACGCCACGCACGAACGGCAGCACCCCGGUGGCCUCCAUG  
>P4005  
AGAAGGUGGGGAGGGGAAGAAGAUGGCGGAGAAUAAGAGGC  
>P4006  
UACCAAAGAAGGUAACGAAUAUAUCACACUUCCAGGUUA  
>P4007  
CAGCCUCAGCUGCAGAAGGAAGAAAGCGCCGGUCUCCUGG  
>P4008  
GCUCCCUGAGUGGGCCGCGGAUGAGCCCGUGGAGAAGACGC  
>P4009  
GGGAAGCAGGGUCCUAAAUAACGUCCCCUCUUGGCUCUUGC  
>P4010  
GCUGCGCACCUGAAGAGGAACUGCUGGAGGAGGAGGAGA  
>P4011  
GGCUGUCGCUGACCCAGGAGAGCUGCCUGUCUACAUCAGC  
>P4012  
CCAUCAUCCUCUCCACAAUUUCUUGGUGACUCGGGG  
>P4013  
UGACGAGGAGGAAUAUGGCAAGGAGGAACAUGAAAAGAAG  
>P4014  
GCCUGGUAGACAGGCUAGCAUGGCAGAUUGGCAUCAACAC  
>P4015  
CGGCACGGAGGGCCUCGGGACCGCACAGACCCGGACAACA  
>P4016  
UGUCUACUACAACCUGGUGAAGGCCCGCCGUGCGGCGGCA  
>P4017  
CGGAGGGGGGUGAGAGGUACGUGAGGUUGUGGUACGUGA  
>P4018  
AGGUUAUGGAAUUGGAGGUGAUGGAGGCCCGUCUCAUCCGG  
>P4019  
AGGGAGAAACUUGUGAGGAAUAAAGGAAGUUAGGCUGAGG  
>P4020  
AGAAGUGACAGAGUAUGGAAAGGGAGAAAGAUAGGGAGAA

>P4021  
UUUCCGGCGCUCCGGGUGCGAGAGACAGGUCGGGCCCCCUA  
>P4022  
GAUGUGAGCCGCCCGGGCCGAGCUCCCAGCAGCAGCAGGC  
>P4023  
CGCGGGGUUGUAGACCUCGGACCUCAUGGCAGAGAUAAUUC  
>P4024  
UGGAGAUGAAAAGGAACUAGAGAGCAGCGAAGAGGGAGGCU  
>P4025  
CCUGUGUAACACUCCGGUUAAGAGCGAGCUCCUGUGGCAGA  
>P4026  
GCCGAAGAGGAUGAGGAGGGACGGUUGGACCGCCAGAUUGG  
>P4027  
CCGCCUCGUCCUGCGCGAGCAGUGGGGGCGGGAGUCAGUCU  
>P4028  
UCCCCGCCCGGGGGGAGAGAGUAGGGGCUCCCCGCCUG  
>P4029  
GACGGUGCACAUUUGAGCGACGCCAUGGUUUUGUGGAAGG  
>P4030  
CUUCCGCGCUUCUCCCCCAGAACGUGGGAAGCUGCCGCUUU  
>P4031  
GCCCCGCCGCCACCAGAACCAGCUCCUGGCCGCAGCGCCAU  
>P4032  
GACCAGCGGGUUCUCGGCCCAGCCCCUCUCGUCCGAACAUA  
>P4033  
CCUGCUGGUGGGCAUCCACGACGUGGACCGGGCAGAGCAGG  
>P4034  
CCCCGAGGCGUUCGGAGGCCAGGCGGGUUUCUGUCAGGCC  
>P4035  
CGAGAAAAGCUGGGGGCGGGGACGCCUGAGCUCACGCGGUC  
>P4036  
CAUGGAGCCAGAGCGUCGGGAUUCACAGGACGGCAGCAGCU  
>P4037  
CCGACGGCCCCGGGGCUGUGGAGCCGACUCCAGCUCUGGGGC  
>P4038  
CAUUUUGCAAGCCUGGAAGGAGCGCUGGAGUGACUACCAAU  
>P4039  
CUUCUGUCCAUCACUUCAUCCAUCAGGAUGCCCUC  
>P4040  
UCGUAGUCCAGUCGCUGCUCAGGAUUGCCGCCGGCAGGGGC  
>P4041  
GCGGCAGCGCGCUUCGCAAGACACCGAGGACGAGGAAUCUG  
>P4042  
UCUUUCCACCUCUCAGUGCAGGAUCCUUCUCACGUCUCUC  
>P4043  
GGAGAAGAAAGACGACGAGACAUAUCCGAUGGAGACAGGUA  
>P4044  
GCGGCGGCUACGGUGGUGGCAGUUCGGCGGGCGGGCGGC

>P4045  
GUAGGUGUAUGUCUGCUGCCACUCAGUCACCUUGAUAGGCU  
>P4046  
ACAGGCCCGACGAACCCCGCAAAAUCCGGAGCACCCAGCA  
>P4047  
AGACUUUCAAGGAACAAGGAUAUGCAUACUAUGCCAAGAAA  
>P4048  
GCCAGUCAGAGGAAGGCGCAAGUCCGGGGCUGCCGCGCGC  
>P4049  
GGUUCUGCGCCGCCUCGCGAAAGACUUGCUUGCUGUGGGCG  
>P4050  
CGAGUUCUGGCUUGGGCUCCAGCUCUCCUCCUGGGGUUUG  
>P4051  
ACCCGACUCGGGAGAAGCUGACACCCGAGCAACUGCAUUC  
>P4052  
UCGGGUCCCAGGUCAGCCGAGAUUUCUCAGGUCCCUCGG  
>P4053  
GGCCUCCGCCACCGCCCCACUGGGGCCAGCGCACCGCC  
>P4054  
CCUCACGUCCUAGGUUACGAAGGGCCCGGCGACCCCGCCAG  
>P4055  
AAGGUAGUAGAGUCCCGGAAGGGACAGGGGGCCCAAGUG  
>P4056  
ACUUGACUGAGAUGGCGCCCACUGCCUCCUCCUUCUUGCCC  
>P4057  
CUGAGGAAGCGGAGCUCCAGAGGGAAGGUAGGGAAGGGCGG  
>P4058  
CGAGGCCAUCCUUCGGGGCGAGGCAGUCAGGCACUCAGAAC  
>P4059  
ACUGCUACCCUGGGGACCCAACCAUCUCCAUAAACUACCUC  
>P4060  
ACAAGGCUGACACAGAAGAGAAAAGCUCUAAGGCAGAGUCA  
>P4061  
CGCAGGAGGGGCAGAACCCCAGGACUCCCCAAAAGAGCUA  
>P4062  
AAGAUGAUGAUGAAUUGGGUAGAGAGACCAAAGAUCUUGAU  
>P4063  
UACUCCUAUCUUGUUUCUCCACCGUUCGGGAGUUGGAGAU  
>P4064  
GCCUCCGAGGGGCCAGAUCCCAAAGGGUAAAUCCCCUGC  
>P4065  
GUAGGGCUCAGGCGUUGGAAUUGCACCGACAGGCAGUCGC  
>P4066  
GCAGCAGAAGGAACUCCCCAAGCCAAGGAGAAGACGCCGC  
>P4067  
GCUGCUAUAUGGCAAGCACUAACCACUAUGCUIAACGAGA  
>P4068  
GGGGCCUGAGGCACUGCAGAAAGUGGGCCUGAGCCUCGAGG

>P4069  
UAGCAGCAGUUUCCAGGACAACCGAAUGAUAGCCGUCUGC  
>P4070  
GCCUGCAUUGGAAUCUACAGAGAGGACAACUAAUGUGAGUG  
>P4071  
GCUGCGAGAUGGAGGCGAGCAGGACACCUGGGCAGGCGAGG  
>P4072  
GGCGGCGGCAGAGCAGGCCCAUCUUCGGCUCGCUUUUGGCU  
>P4073  
GAAGUGGAAAAAGGAGAGCAACUGCUCAGCGGUCUCAGC  
>P4074  
AGCUGAUACUGAAGUACAAAUAUAUCAAGAGGCUGGAGCCC  
>P4075  
CCACAGCGCUCGCCCCGGCUCAGGUGACAGACUCACCUCCC  
>P4076  
AGUCCGACUGAGGAGGCGGCACGGCGGGCGCCGGGGCGGC  
>P4077  
AAGGCCAGGCCAAACUUGCCAAUGGACUCAACACUUUGGC  
>P4078  
GGAGGACUGCAGAGAUGCCCAGAAACGAGCCUUUGCCGCC  
>P4079  
CCACGGAGCCCCGCCGGAGCCACCGUCCUGCUGCUGCCGCC  
>P4080  
CUUGGGCGCCCCUGCCAGGGACGCAUUCUUCAGCAGCGCCC  
>P4081  
AGAUGUGCCCCCAUCCCCUGAAGGAGCUGGCUGUCUCAGUC  
>P4082  
GCACCCCGACUCGGGCUCGUAGGGGGGCUCCCCAUCCUCCU  
>P4083  
UGUCAGAUACGCAUCCAAGAAGUCGGGUGGUAGCUCCAAAA  
>P4084  
GAAGGCCGUGCAGGCAGAUCAGGAGCGGGAGAGGCAGCGGC  
>P4085  
ACAGGGCGUCCAUGGGGCCGAGGCGCGGCUGCAAGGAAGGC  
>P4086  
UGGGAACAGCCGCCCGAAGGAGACCAUGAUUUCGGCCGC  
>P4087  
AGGCCAGAGUGGAGUGGGACAGGAGGUGCCGAGAGAGGACU  
>P4088  
CGAAGAGCAGCGAGAGGAGGAGGGGAGAGCGGCUCGUCCAC  
>P4089  
GAGAGCCUUCAUUCCGUGUAUUCUUGUUGUAGCUGCUCCA  
>P4090  
UGCCCCGCGGCCCGGCCCGCAGCGCCGCGCUUCCGCAGCUC  
>P4091  
GGUUCGGGCCGGGGUGCUGAAGGAGAAGCCCCUGUGGUUUG  
>P4092  
CUUGCUGGGUGCCCCUGAGAAGGGCGGGUGAUCUGAGGAGG

>P4093  
GUUCAACCAGGCCAUGGACGACUUCAAGACCAUGUUCCTCA  
>P4094  
AGGGAAAAAAGGACACCUAUCUCCUACAAAUGGUCUUUA  
>P4095  
CCGCUUUGAAAUGCAGCGGGAUUUGGUGAGUUUCCCGCUGU  
>P4096  
GCAAUCAUCAUCUCCACUGCAUCCUAAUUUCCCGAACACG  
>P4097  
AGGGAGAGGAGGAGAAGGGGAGGGGGAGGCUGGGCUCAGC  
>P4098  
CCAAAAGCAAGACGAGCAAGACACACACAGAUACUGAAAGU  
>P4099  
CUGCCAUUUCAUAGAUCAGUACUCUUGAGGAGCUAAUACA  
>P4100  
CCCGGAAAGAGACAGCAGGCACUGGAAAGCGAGGCCGGUGG  
>P4101  
CCUCCUUCUCCCGCGCCAGAGGCCCGCCGCUCUGGCCCG  
>P4102  
CCUCCUCCGGGUCGGGACGAGUGAUGCCUCCGGGGAGGA  
>P4103  
UCUCCAGCUGCUGGGCCUGACCUUGGUGGCAUGACCGGC  
>P4104  
UCAUGUCAUUUCUUGUAAGUAAACCAGAGCGAAUCAGGGUG  
>P4105  
CCUUCUUCAUCCUUGAGUCCACCACCUUGAAAUGACCUCUG  
>P4106  
AGAGGAGGAGGAGGAGGAGAUCCACUGCUGGUACCACUGG  
>P4107  
GGUUACGGGGCUGGGUGCGGAGCGAGCGUGAUCUGAGUGGA  
>P4108  
AGGCAGCGGACUCCGCCAAUAUUAUCUGUCCAAGAUUGAAG  
>P4109  
UAUGGGGUUAUGUGCAUGUGGAGGCCAGGGUAAGGUGAAUGG  
>P4110  
GAUGAAGUAAUGGAUCACUAUGAACUACAGUGCUGGUGAG  
>P4111  
GUUUUAGGAAGGAAGACUUCAGAAGUCAUUGAAACCCUUC  
>P4112  
AGGACGGCGACGCCGAGGAGACCAGGAUUCUGAGGACGAC  
>P4113  
CAGUCGCCCUACAGCCGCUGAUUCCCCCGCAUCGCCUCCC  
>P4114  
AGGGUUAGAGACGGAGGUACAACAAGGUGAAAAGGAGAGAC  
>P4115  
GCCAUCAACCGCUCGCCGGGAGCCACGCGGGGCCUGGCGC  
>P4116  
CCAGCACGUGGAGGCCGUGGACAAGCGGCUGGAACAGAGCC

>P4117  
ACGGGGUCUCAGAAUCCUGUAGGAGUUGCGUUUGAAAAUCG  
>P4118  
GAGCUCCUCCAUAAGCGCCGAACCCAGGCUCCUAGAAGUCG  
>P4119  
UGAGAGGAGCUAGCCUUGAAAGAGUGAGUAGGGGCUGAGAG  
>P4120  
GAGGGGCGGGCCGGACGCUGAGCGGAGCAGCUGCGCCACGG  
>P4121  
CGGGGGUCUCCUGGGAUCCGAAGAACCUGCCUUUCCGCC  
>P4122  
GAGGAUGACUUUUCUGUCUAGGGGGUGAUGAAGAUGGUUA  
>P4123  
CUACCCACCGGAAGAUAGAAGACCCAGUAGGCCCUCCUGC  
>P4124  
GGCCAUUGGAACCUCGGUCAGCGGCCCGAUGUCCCCUCC  
>P4125  
ACCUCUCGGUGUUAUUGACGAUCACUCCGCCGCCUCCGAG  
>P4126  
GGGCUCCGAAGGUCAAGAAACUGCCUUGCUGGGCGUCCGG  
>P4127  
GCACCACGUCCACCGCCGCUACCGCCGCCGCCACUGCCACC  
>P4128  
CUCCAUCACCCUUGGGCUCCAGUCUGCUACCCCCAGACUUG  
>P4129  
GCAGCCCGCGGCCAGCACGAACUGGUUGAUGAUGACCUGGU  
>P4130  
CCCGACACCAGGUCGUGAGAAACAGCAGGCGCUGCGAGCC  
>P4131  
CUGGAAGACAUGGCCACUCCAGUCGGUGUUGAGCACGGCGA  
>P4132  
GACAACAGCCUUGCUGGGUCACCUGGAGGAGCUGCGCUCUU  
>P4133  
AGCUGGAGGUAGGGACAAGGACUCGGCACUGAUGGGGUGGG  
>P4134  
GGCUAGUAGGUAGGGUUAGUAGGUAGGGCUAGUAGGUAGGG  
>P4135  
CAGAGGAAGGCGAGGCAGGCACGCAGGAACUGGGCUUUUUA  
>P4136  
GACAACCCAUCCGGCUGGGACAGUACUGAUUCUCCAGCUCCU  
>P4137  
GAGAACAUCGACGGAGAAAACAGGAGCUGCUGGCUGACAU  
>P4138  
GCGCCCACACCACACACACCACCCAACACACAUGUGCCAGA  
>P4139  
AUGAUUCCUUGGUCCAUCCAGCAACGUCAAGGUGGUUCUG  
>P4140  
GGGGGAAGCGGCGAGUCAACAUGGAGCUUUCAGCGGUGGGG



>P4141  
CGCGCUGUGCUCUUCGCGGACUCUGAAUCAUGGCGACCAC  
>P4142  
GGCGGCCACGGACGCGGCGCAUGUCGGCGUCCACGGGCA  
>P4143  
GCGUUACCAGCGCUCUCUGCAGCAGCAUGGCCUGCUUC  
>P4144  
CUUCUCCUGCUGGUCCAGCAAGCGCUUUUGCUGCACCUGCU  
>P4145  
AGCCAGGGUGGGCAUACCUGAGAGCCGCGCUGCCUCCACCU  
>P4146  
AGGAGGGUGAGGGCCCCAGCACGGCCACACUGGCCCCGGUG  
>P4147  
CGCCAGGCCCCGAGAGGGCAGCAGAAGCCCGCCAGGUAGC  
>P4148  
AUGUAAACCGAGAAGCCAUAUUUUUGGAAGCCAAACUCCUU  
>P4149  
CCCCGCCCGGAAUCUGUGGAGGGGCCGCUUAGCCUUGGGA  
>P4150  
GGGUGCAGGCGGGUCCUGGGAGUCCCCGGCGAGCGCGGGGG  
>P4151  
CCAUGGCGACCUCAGCCCAACCCGACGCGCGGGCGCUC  
>P4152  
UCCACCAGGCCCCGCUCGCCACCCGGCACCUGGCCUCGCAG  
>P4153  
CCGACCCACCGCGAGCCGAGCGCACAGUCCUGGGCGGGA  
>P4154  
GAUACAAGAUGGUGCAGGCCAUCAAUAGGGUGGACGAGGUG  
>P4155  
CGGGGGGCGCGGGGGCGGGAGGCCCGGGGGCCUCGGCU  
>P4156  
GCUGGGAGCGGCGGGGCGACAGGAAAGCGAUGGUGAAAGCG  
>P4157  
CGCGGGCGGCCCCGAGGAGGAGGCGGAGGACGAGACACUGG  
>P4158  
CUGUGCCCCACGCUUCAAGGACUUCAGAGGAUGUACAGGG  
>P4159  
CUGGGUAGCAGGGUGGUGUAUAGCGGCAGCGAGGGGCUCG  
>P4160  
AGGGAGGUGUCCUUUUUCCAUUCUGUUGCAGUUUCCGAACC  
>P4161  
UCCAGCCGUUAUUGC UAAACAGGACGCUCUGAUCCAGGCG  
>P4162  
UCCUGCUCAGGCUUCGAAUAAGCUCACCAUCCACCUGACC  
>P4163  
UGGAGCGCCUCAUCACGGACACCGACAGCUUCCUCCAUGAU  
>P4164  
AGGCGGCUGCAGCGGCGACAGACAACGACAGCGACGGCU

>P4165  
GGAAGCGCAGGAGUCAUGAGAAAUGAUGGUUCAGGCAGAGA  
>P4166  
UGGGCUGGUUGUACAGCCGCAGGAUCUCCUCCAGGCUCAGC  
>P4167  
GCGGUUAGUCCUUGCUGGCCACCCACUGCGACCAUGUUCG  
>P4168  
GCAGGACGGCGGCGAGGGCC AUGUGGGCACCGUCCGGAGCU  
>P4169  
GAACAGAGCAGAGAGGUGGCAGGACGGGCAGCAGGCUCCGC  
>P4170  
CGAGAGCCCCGGGAGAGUGAAGGGCCGGGGAGACAAGGCG  
>P4171  
UCGCGCCUCCGAAGCACCC AACUCGCGCGGGCCCCGAAGC  
>P4172  
GGGCAGGCUGCGCAAAGGUGACUUAGGGAGACCUUGC GGGC  
>P4173  
CCAGCGCCGUGGCGGGCGGAGGCGCAGGUAGGGACCGCCG  
>P4174  
CAAUUUCUUUCAGAAUGAGGAAAUUGAAGCAAUGGCAGCCA  
>P4175  
CGCCAUCGCCUUGUUUCCCCAUCCCCCGCCAUGGCCGAGGA  
>P4176  
CGGCGUGAACGUGGUGUCGGAGGGAUGUCAGCCUUCUCUGA  
>P4177  
ACUACCGUUC CCGGCAUGCC AUGAAAUUGGCCUCGGCGCUG  
>P4178  
UGGCCCGGCGCUGGGGCUUCACCGCCUCGGCCAUAGACCCU  
>P4179  
GCGGCUC CCGCCACUUUACUAGGAACUCCUAGCGGGAGAUG  
>P4180  
CGCUGCCGGGGCUUGUUC CAGGAGGAGAAGGCGGCGGUGG  
>P4181  
AUUAGCGGGGGCCUUUCUGAGGACGGCGUACGGAGUGUGG  
>P4182  
CGAGCUGCAGGCCGGACCGGAGCCGGAUCUGUACCCGCUGA  
>P4183  
CUUGCCCGGAGCCUGAGAGGAUUAUGAAAACGUGGCGAGCG  
>P4184  
CCCGCGAACCUGCACAGACCACUCGGCGGCGUCCAGGCGG  
>P4185  
CCCCGGCCCCGGCCACGGCCACAGACGCCGCCGCCCGGCC  
>P4186  
AGAAGACGAUCUGGGAGAGGAAGGAGAGAUGCUCAGGAAGG  
>P4187  
UCAACUGUGAUUUAGAAUAACAUCCACCUCUCAUUUUCU  
>P4188  
CUGAGUCUCACCCACCUAGCACCAUGCCUGCAGUGGCCUG

>P4189  
CCGGCCGUCGCGCCGCAGCACAGCCGCUGGGAGCGCCUCA  
>P4190  
UCAUCGUCCUCAUCCGAAUCACUGAGAAAUGGAUUCACGCC  
>P4191  
CCUGCACACCUGGAUCCAGGAUAACGGAGGCUGGGUAGGUG  
>P4192  
CCGCGCUUGCUGCUGGUAACAGGGCCUUGCCUAGUGGGCCU  
>P4193  
UCGUCAGCACUUUAUUA AUGAUGGAUAGUGAGAAUAAACC  
>P4194  
GGUGGACGACAUCUUGGAGAGGCAGCGACGACAGCGACA  
>P4195  
CGUGCGGUGACAAGGGUCAGACUGGCGGCUCCACUGCAGC  
>P4196  
GGGCCCGGCGCGGGGGCCCAAGGUGUCGUUCUCGUGCCGCG  
>P4197  
AAUGUGGCAGUGGAGAUGGUAGCCUCCAGCCACCCAGGAAG  
>P4198  
UAGCAAGGGCACUUCAGCGAAGGCUCGCGGCUCGAGGGACU  
>P4199  
CGUACGAGGGGCCUUGUUGACUGCGUGGAGCUCAUGGCU  
>P4200  
CUCGGCAGCCAGCCUGCCCAGACACCAGCUAUGCCCCCGU  
>P4201  
CACCACGGAGCGAGAAGCCCAGAUAGACGCCCCGGCGGCC  
>P4202  
UCCUGGGGCGUGGUCGGCACAGAAGCAUGGCGGCCACCUCU  
>P4203  
CAGUUCAGAAUGCAGCCCACAGCCACCAUGGCCACAGCCGC  
>P4204  
GCGCUGCUCGCGCCCGGGACUUGGCCGCCUCGUCCGCCA  
>P4205  
CCAUGGCAUCAGAUGAAGGCAACUUUUUGUUGGAGGGCUG  
>P4206  
GGCCGCGGGCGCCGCCCCCACGCGGGGCUGCAGUUCUCGC  
>P4207  
CCGCGGCUGUGGGGAGGGCGACGGAGCGGGUGACCUUCCGG  
>P4208  
GGCCAUGGACGGCCUGAGGCAGCGCGUGGAGCACUUCUGG  
>P4209  
CCCCACCCGAAAGACCCUCCACGCUCGUCCUCUACAGAGUC  
>P4210  
GAAGGAGCGCCGGGUGGCCAUAAACGCCCGGGAGCGGCUGC  
>P4211  
GCAGUCA AUGGCCCGGAAGAAGCCAGUGGAGCGUAGCAUGG  
>P4212  
GGCUCCGCUCGGGGUUCGCAGUGUUCAUCUUCUUGGGGCG

>P4213  
GAGCGCAGGGCACGGUGGUCAGCGUGCAGCGGGACGGGACU  
>P4214  
GCUCCUCGCUGCUGCACUCAAGUGAUACUCCUCUCAGGG  
>P4215  
GAGCAUCUUGGACUUGUCCAAGUACAUCGACAAGACGAUCC  
>P4216  
AACGAAACAUAACACACAAGCGCCCCGUGCCCCCAGUGA  
>P4217  
AUGAAGCCGAGCGGCAGACAAGACGCCUUCAGCAUGUUCUC  
>P4218  
GGGGGAGCGCCAGCCGUGGCAGCCCCGGGGGCGGAGGUGCC  
>P4219  
GGUCUUUCUUUAGGAGCGAGCGGGUUCGCCAAGCUCCUG  
>P4220  
GCCUCCGGGACGCCUCACCGAGCUCUGGAGACUCAGGACCC  
>P4221  
GUCCUGGUCCAUGGCGAGGCAGGGCUCGGCCCGCGGCAAGG  
>P4222  
GGCCAGUGGGCUCGCCGGCGACGGCGCGCACGCUCGUGGUC  
>P4223  
CAUGGAGCUGGAGGUACCGGACGAGGCGGAGAGCGCUGAGG  
>P4224  
GGCGGGGUUAGGAGCUCCCAGGCCCCCCAGCCGGCCCACG  
>P4225  
GCUCCCCGCUCAGCCACGACAGAUGGUUUUCUCUCCAGAAC  
>P4226  
GCACCCCGGCGCCAGGCUCCAGCAGCGCGUCUUUGAGGAGC  
>P4227  
CUUCUUCAGCCCCGCCACCGACAUGCUGCCGCCCGCCGCCG  
>P4228  
UCUCGCCGUCAGCAUGCCACAGCCUUCAAGCCCGGGGACU  
>P4229  
CCCGGCUCACCUCUCUCUCCAGCUCGGCCUCGGGCUCGGAG  
>P4230  
CCCGCGGGCCCCAGUGAGGCACUUUGUCCCGCCAGCGCUG  
>P4231  
CAGCGCCUCCUCUGAGGGGAAGUGAGCAGGCGGGGGCGGCA  
>P4232  
GCGGUGGUCUGGCCGGGGAAAGUCUGCACGAUAUCGGUCCU  
>P4233  
AAGAUCUGAUGAAAUUGGC AUCGAGUUAGAAGCCACCAGC  
>P4234  
CGUGUCCUUUGAUAAAGGUCAAGGAGCCUCGGAAGUCAAGAG  
>P4235  
CCUGCCGGGUCCCCGACCGCACCCCCUCCCGUAGGGCACGG  
>P4236  
GCCGCGGCUGCUCGCUUCCC AAAACCCCCGCCAUUGGCCCC

>P4237  
UCUUUGUGUUUCAGAAGGAUAAAGGACAAAAGGUAAGGGGC  
>P4238  
AGCUGGAGCGUGAGCAGGCCAAAAGCUCCAAGGACACCUCG  
>P4239  
CGCAGCGGCCCGCCGCAGCGGACACUCCAGAACGGCCUGGCC  
>P4240  
GGCCUUCGAGGACAGCGAUGAUGGGGACUUCGAGGGCCAAG  
>P4241  
CGGCGGCUUCCCCGGGAUCGAGGGACGCGCACGCCAGAGGA  
>P4242  
CGGCCGCGGGAGCCCCGCGGAGUGGGGGCAGCGGCUACUUC  
>P4243  
CCGCCCGCCCGCCGCAGCCACCACCGCACCCGGUCCCCGC  
>P4244  
GCUGGACCUGUUGGACAGAUUGUAAAAGUUCGUGAAAGAAC  
>P4245  
GAGGCGGCUGCGAGAGUGGCAGAGGAGCUGGCGGAGAGCGG  
>P4246  
GUCUUCGAGUUUCGACCUCGAUCCAGAUGUGAUUGGCCCCG  
>P4247  
UUUACUAUCACGUAGUAGUGAGUUAUGGGGGCUCUAUGGC  
>P4248  
CACCUCGCACCCCCACCCUCAGCCCGGCCCCACCCUGCU  
>P4249  
AGGUCUUGGGAGAGGCUGGGAGGCAGGAGAGACUCCCCAG  
>P4250  
GACCUGGAGCGCUCGCGAGAAGCGGCAGCUAGUGCGACUCC  
>P4251  
GCUCUGCCCCUGCUGCACCUAGCUCCGCACCCAGGACUCCU  
>P4252  
GCCCCUCGGCGGCCUGGGGCAACCGGUACUUUCGCCACCC  
>P4253  
GGGCAGACUCCACCACCAUAAGGCGAAACCGCACUGACGG  
>P4254  
GCUCGUGGACCGACGGGCGCACCCAGGUAGGGGGGCGGCUG  
>P4255  
CGAGGACGAAGAUGGAGACGAGAAAGUAAAGGCGGGUUAUU  
>P4256  
GAAA AUUGGGUCUGGGGGUUAGUCCUGGGGUGGAGGUCUGG  
>P4257  
UCUUGAAGUUCUUCUGCCACAUAGCAACCUGGUGCAGUAUG  
>P4258  
AAGGACCUUGUGGGUGAUUAAGAGGACUUCGCUUUUGCUCU  
>P4259  
AUCGCUACGGGGACCGAGACAGCAGCAGCGACUCCAGCUCC  
>P4260  
GGCCGCGGCGCCAUGGGCAACCGCGGGAUGGAAGAGCUGA

>P4261  
GUCUCUGUCCUCAGCGAGGG AUGCGGAGACGCCCCUGAACG  
>P4262  
CCUCGCAGCUGCUUCUCGGC ACCGUCUUGC GUUUCAGCAG  
>P4263  
GGGCGUGGGAGUGAGGUACC AGAUUCAGCCAUUUGGCCCC  
>P4264  
GCUGGCAACAACGGUGCCUG AGAGCGCAGAGCCUGAGGCAG  
>P4265  
GGCCUGAGGGGCCUGAACUG AUCUCACUUGGCUC CGAAAGC  
>P4266  
AAAGCCGCCUCCCAAGAAGA AGAUGACAGGCACCCUCGAGA  
>P4267  
CAGGGCGCGGACAUGGUCC AGGGGCCUGCUGAGUCCAGGC  
>P4268  
GCAGCGGAUCAUAGCUGCU AUGGGGCUGAGA UCCAGGAAU  
>P4269  
GAGAUGCUGGUACUAAAGGC ACUGCCUUGCUCACCCAGUA  
>P4270  
AGCGACGCGGCGGCCCGGG AUCCUCACACAACAUGCAACU  
>P4271  
CACCACCUUGUCCUGGGCGU ACAGCCCCUCCGGCAGGGCCC  
>P4272  
CACCCACCCAGCCGGCCCCU AGAAUCGCGUCAGCCCCAGAG  
>P4273  
UUCUCUAUAGGGGUCCUUCA AUCCAGCUCUGCCUGGCUGG  
>P4274  
CCGCCCGGCACAUCUCCCGG AGCCGGGGCUGGGGGGAAGCG  
>P4275  
CCGCAUCGAGGGCUUCACCA ACGUCAAGGAGCUGUAUGGCA  
>P4276  
GGGACUGGGGCGGCGGAAAA AGGCGCCCCUCUAGUGGAAA  
>P4277  
GCUGGGGGGCAAGUCACUUC ACAUCACAGGGCCUCAGUUUC  
>P4278  
GCUGCCUAACUGCGCGGCAC AGCACAGGCUCCCUACAGCGC  
>P4279  
CGGCGGCCGCGGGGUCUCC AUGAGGUGGUACC UAAGAGAG  
>P4280  
GGCCCAACCCAGCCAGCCA ACGCAGCCAGCACCAACCCCC  
>P4281  
GGGCCGCGUCGAAGACAUGG ACCAGGGCUACGGAGGUUUGU  
>P4282  
CCGCCACCGCCGCCGCCCCC AGAGGAGGAGGAGGGGCGC  
>P4283  
CUCGGGUGUGUGUGGAGGGG ACCUGUGGUUAGCAGCAGCU  
>P4284  
GGAGGGGUCCAGGAUCCUGC AGCUGCCGGCCCCCGGGGCC

>P4285  
UUGUCCUUCUGCUUCUCCAUAAGUCAUCUUCUCAAAACUCGGG  
>P4286  
CUACUGGCAGCGGAAGCUCUACCGGCACCAGAAACAGAGCA  
>P4287  
UGGACUCGGAGACGUCGGCCAGCACCGAGAGCCUGCUGGAG  
>P4288  
UGCCAUCGCCUCGCAGCGGGAUAGCAGCCGCACCAGGUUA  
>P4289  
AGUGAGUCGGCGGCUGAUUUAGAAGGAGGUUCAGGCUACGG  
>P4290  
UAGGCAGAUUUUUGAAAGGACUGCCUGUCUACAACAAAAG  
>P4291  
CGCAGCCCAGCGUGUAGUGACGAGCAGCGCGCGGCCUGG  
>P4292  
GGAAGAGGAAUAGGGGUGGCAGUGUCAUUGGUGAAAAGAC  
>P4293  
UUGUCCAGCCUUGAUUGGAGCAGGUGGGCUAGGUGGCC  
>P4294  
CUGUGUUCACCAUGCUCAGGAUGCGGCCGCAGAAGACCUC  
>P4295  
AGUGCACCUUCUCGGCACCCAGCCACAGCACCAGCCUCCUG  
>P4296  
AGAUCGCGCUGCACAAUCAGAGCAGGCGGAGGAGACGGCG  
>P4297  
GGAACCGGCCCGAGGGCCUACCCGGAGGCACCAUGAGCGU  
>P4298  
GGCUGGUUUUCUAUGAACGAUUCGGCCUGGGAUGCGGGC  
>P4299  
UUUCUUGUAAUACAGCAUCAAGUCUCCUGUGUAAUUCGU  
>P4300  
GUGAGCUCGCCUGUGGCCCCAGCUUCGAGGACGCCUGCUGC  
>P4301  
GCAGCUGCCAGUGCGUCAUCAGAGAGCGCCGGAAGCGGUCC  
>P4302  
GCGCAAGUACCGCAGCCAGCACAUCAUCCCCUGGAGGAGG  
>P4303  
CGGGAGAGAGGUGGGCAAGGACGAGGGCGAGGGCACGGCCG  
>P4304  
CCUGCCAGCCCAGCUCACCAAGUCCAAUGCACCUGUGCACA  
>P4305  
GGGGAGGGAAGAGGCCUCCUACUACUCCUCUGCCCCAGUC  
>P4306  
CCAGUUCUUCAGCAGACUCAACUAUCAUGGACAUUCAGGUC  
>P4307  
GGCAGGAGGGCGCUCCGAGACCUGAAGUCGUCGUAGUGGG  
>P4308  
GCCCCAGGCGGGGACGGCCCAGGAGCGGAGGAGCAGACAGC

>P4309  
CAUCUCUUCGACCGCCAGCAACCCAGUUCCTCGCUUCCU  
>P4310  
AGCUAAGGCACCCAGCCGGAGGAAGUGAGCUCUCCUGGUG  
>P4311  
AUGGAGGAGCAGGACGCCAGAGUCCCAGCCCUGGAACCGUU  
>P4312  
ACCAUUCUGGCAGAAGCGAAUACCCACGAAGCCCGGCUCG  
>P4313  
GCCGCUCCCGGGCCUCCCGCAGCGUCCGGCUCGGAGGGCG  
>P4314  
GGGACGCAGACAGGGUGUGCAGGGCCGUAGCUCGGGCCUGU  
>P4315  
CGGCCUGCAAACCUGGCCACUCCGCGCUCUUUCCUCA  
>P4316  
CUCACCUGCUCCCAGGUCGAACUCCAUGGCGGUAAGAGAAG  
>P4317  
CCAGGUGCCCGCUGGGCCCCAUAGCCCCGGCUCUGGGCUGA  
>P4318  
UCGCGGGGCGCCUCAUGCCCAGACUUCAGGGGGCUGUGCGU  
>P4319  
UAAGGUCCAGUUCUUGGACCUGCCGGCUCUCCACUACC  
>P4320  
CGCGGCGAACCAGUCGUACCAGUACGGCCCCAGCAGCGCGG  
>P4321  
ACGGGACACAGUGGUUGGUGACGGGACAGAGCGGUCGGUGA  
>P4322  
UUGGGAAAAGCUGCCGACCGAGAUGAAUGGUGCGACAGCGG  
>P4323  
CUUCCCUCUGCCUUUACCCAUAUCCUCCGCACCCAUCAUC  
>P4324  
GAGGAGUGGUCACCUGCCUGAGGGCACUUCUGUCCCACCAG  
>P4325  
GCAGCAGUGAGAAGGAGGGCAGUGAAGAUGAGCACUCGGGC  
>P4326  
GGAGCUCUUCUCGCCCCGCCACCUCAUCUCAACCCACUUUC  
>P4327  
GGCAGUCAGAUCCAUGGUGUACGGUUGGCCAUGAGGGGUG  
>P4328  
GGGUUUUCUUCUCCAGGGAACCAGCGGGGAAACUGAGGCU  
>P4329  
GUCAGUCAGGCUGGAGCCCCAUCCGCAGAGAUCUCCGCA  
>P4330  
CCCUCAGUGCUGCUUAGGCUAAGAGAGGUGGGGUGGAGGGA  
>P4331  
CUUUCUUGUGUUUCCCGGCAGCGGCAACGGCGCCGGCAGC  
>P4332  
AGUCGGGCCUUGCCACGGGGACAGAAAACAGAAGAGAAAUG



>P4333  
GGGGCACUGUCACGGUGGGCAUCUUAAAGACACCCUCACCC  
>P4334  
AGAGGUAGCCACCCACAACC AUCAGGAAACGGCGGCGGCA  
>P4335  
UGUGCCUACAGAUUGGACGAGUGCCACCGUGCCGCCGC  
>P4336  
AGACGGGGCGGGCACCAUGACAAGUUACGGCAGAGCCUGC  
>P4337  
AGGAGGAAAAACGUGACUUUAGCCUGGGUUUCUCCAAAUC  
>P4338  
CGGGGUCUAGCCGGAGUGGAGCGGCUGCCAGCCGAGGAGC  
>P4339  
GCGCAGGGCGGCUGGCACAAACGGCGGGCGCCGGGGCCGGAG  
>P4340  
CGCUGCAGCGCUGGUCACCAAGGGGUGCCAGCGAUUGGCAG  
>P4341  
GCCUCGGGCCCUGGUCCCGACAGCGCCAGCGUCAGCAGCA  
>P4342  
ACAUCCUGGCUCAAGCGCCAAUACCAGCACCCACCGUC  
>P4343  
GGAGCCUGCUUGGAGGAAGAGGAAGAGGAGGACAGUG  
>P4344  
ACACAGGGCAAGGGUCACCAAGUCGGGGCCUAGGGACUCCU  
>P4345  
AGGUCGAGCCAGGACCCGAGGGCUGGACCCUGUCCAUU  
>P4346  
UGGGGAGAGUGCGGAGCCGAGCGCGGAGGCUUCGGUCCG  
>P4347  
ACGGCUCUUUGCACGGCCACCUAACGCUGCGCCCGCUC  
>P4348  
CUCUUGGGGCUCCAGAUGGAGUGGAAGGGUGCUUGGUGG  
>P4349  
GGGACCUCAAGUGAGGAGGUAAGAAUGGCGUUGAGAGAC  
>P4350  
CCCCACCAUGGCCCGACAGAUGCCUUUCCGCCCGCGGU  
>P4351  
CCCAGGGUUUGCCUCCCGAUUGGGCCUACAAGCCAGAGU  
>P4352  
CCGGACCAUGUAUUCGGCCCACAGGCCCUAUGCCCGCGU  
>P4353  
AGAUCAAGUGUGAGGAGAUGAGGCUGGGGAUAGUCAGGGGC  
>P4354  
GCACGGGGGAAGGGGGCCUCAGGGGCCAGGGAGUAGUCGAU  
>P4355  
GCAGCUCAAGUCACUGGGGAGCAGAUGGCAGCCGAGAGCC  
>P4356  
UCUACUUGCAGAAGGACAGGACAAUGGGGCGGAAGAUUCUG

>P4357  
UUCGCCUGGCCAGAAGGAUGAGGUAGAGUAUGGGGUCCGAG  
>P4358  
AGCGGGGAAGGUCCUGGGAAAGCUGGCAGCGAGGGUUUGCA  
>P4359  
AGCUGCAGGGGGUCCUCUUC AUCUGCUUCACCU GCGCCCGC  
>P4360  
CUGUGGAGAGCUGGCCGGGGAGGGACGCUGCUCAGCUGCUG  
>P4361  
AGUCCUGUAGCGCUGUGGGAAGAGGGGCUAUGCGCGUCGGG  
>P4362  
UCUAAUCGUCCAGGGGCAGGACAGGAAGUACAGACAGAGAA  
>P4363  
CAGAGAUGGAAGAGCCGGGAACAGAGAAGUGUGGGGAAGAG  
>P4364  
GCCGAUCGGCUGGGCGGUUUAGUAGGUGCCUGUGGGGCUCC  
>P4365  
GGACUACUGGUGUCCAGAAGACGGGGUCCCAUUCUCCAAC  
>P4366  
GGCUUCCAUCGGUUAUACCUACGAGGACAGCACGGUGGCCA  
>P4367  
CUCCAGCCCAGACCUCACCGAGUACAUGGCCUUCUCCUCCU  
>P4368  
UUGCACUGGGGUGAGCGUCCAGAGCUGGGGCCGGGGAGAGG  
>P4369  
CCACCCACAGGUCUUUGCACAGAACUUGAGGACAUC CAGC  
>P4370  
GGGUCGGGGUCGUGAGCCCACAGCUCAGCCACCAUCUCCG  
>P4371  
GGUGCCCCAACACAGGCACAGCUGGUGACGCAGAACAGGU  
>P4372  
GGCACCAUGGACAGCGAGGCAUUC CAGAGCGCGGGACUU  
>P4373  
CAUCAAGCCGCUGAACGAGGAGGCGGCAGCUGAGCUGGGCG  
>P4374  
AGAUGUCUAUUGCCGAGUAGAGUAAUAUAUACCCAGAGUAU  
>P4375  
CCAGCUCGUCUGGGAUCAUCAUGGGCACAGGGCGGCCCCUC  
>P4376  
GCUCCAGCAGCAGAGGGUGCAGGGAGAAUCUCGCUUGCUC A  
>P4377  
GCCUGCAGCGCCGGGACCGGAGGCGGAGGCAGGGCCGGGCG  
>P4378  
GGAGAGGGAGAGGGGGAGGAAGAGGAGGGGGCUCCACUCC  
>P4379  
UGUACACAGAUAGAGGUGGCACUGGGCUGGGUCGGGGAGGG  
>P4380  
CGUCAGUUGAACCGCUCGCGAGGAGGGUUGC UAUGGAGAA

>P4381  
GCGGGUGAUGGUUUCUGGGCAGGUGCUGGAGCUGGAGGUGG  
>P4382  
GCUGGGCCGACCUGGGGGCCAGGAGCCUGGGCGGCCCCCC  
>P4383  
GACUCAGGGAAGAAGGAGAAAGAGCAAUCAUGCAGCUUGGG  
>P4384  
CGCAGUUCUGCAGGAAGGGGAUCUGCCCCAGCACUGAGCCG  
>P4385  
GGAAAGGGCAGGAGAAUCUAAGACGGACCUGGUGCGGCGG  
>P4386  
GGGACCGUGGCCGGGGGCGAAGGACCCCCGGGCGCCCCCGC  
>P4387  
GGCAUGGGCAGGGGCAGCCGAGGCAGGGGCAGAGGCUCUAU  
>P4388  
CAAGAGGAAGAAGGAGGAGGAAGGUGAGCCCCAGAAGGAG  
>P4389  
AAGAAAAGUGCUGGACAGGAAGGGAGAAUUCUGACGCCAAC  
>P4390  
CUCUCAAGACACCCCCUCCAGUCCCCUCGGCUUCUGAUUC  
>P4391  
GGAGAGCAAGGGAGGGAGGAAGGCGGUGAGAGAGGCGGGGG  
>P4392  
AGCUCCUCCCGCAGGCGCUGAAUCUCCACCAGCAGCUCCUG  
>P4393  
AGGCUGAGAGGAGUAGGAAGAUCAGGAGCUAGAGGGAGACU  
>P4394  
UAUCUUCUGGGACCACACAGAGCCAAGGGACAGAGAGAAG  
>P4395  
CCACGCUCUGAUCACCCCGGAUCCCUUGGAGCCUCACACCA  
>P4396  
AAGAUUGGAGAGAGAGAGAGAGAGGGAGAGAAUGAGUGAGAGA  
>P4397  
GAGCCCAGCCUGAGGGUGAGAUGAACGCGCUGGCCUCCC  
>P4398  
CAAGGAGGUGAGCAUCUUGGAGCCUCGGGCACCUGGAGGG  
>P4399  
AGGAGGACGACAUGC GGGAGAUGGAGGAGGAGCGACUGCGC  
>P4400  
GGAGUUCUCGCAUCCACUCAGAGGAAGGAGUUUGGGGACA  
>P4401  
GAGGCACCGGUCCAGGGCCAGCUCGGGUGCCUCCCCCCCC  
>P4402  
GUGGACGCCCCGGAGUGGAAGCCGAAGCAGGAGUUGUUGU  
>P4403  
CACUCCCUGCUGCCUGUAAUAUUUGUUUAUCCCCAGUU  
>P4404  
GUCCCCAGCGGCCUCGGGCUAUGGGACCCAGAACAUCGAC

>P4405  
CUCACAGGUGCCUCCAUGGCAGGCUCUGAAGAGCUGGGGCU  
>P4406  
GGCGGUCGGAGGCUCAUCCC AUUAGCCAAGGUGGCUACAAA  
>P4407  
UCAUGUCCUGCAGGAGGUGGACAUCUAUACCGUCAAGGUGG  
>P4408  
GGGAGCUGCCGCGGGCCACAAGGGGGGCUGCGGGCUCCACC  
>P4409  
CAGUGCGAUGUCGUGGAGGCACGGCGCGCUGCCUCCGCCA  
>P4410  
CAUCCACAUCAGGACAUCCCAGCUGGAGUUAACCUUCAUC  
>P4411  
AUCCUCAAAAUCACAGGAGGAGCAGGCCCAGACCUCAGAG  
>P4412  
CUGCCUGCGUAGCCCCGGCC AUGGCUCUGUAGCCUCGACCC  
>P4413  
GUGUGGUCACGGAUGGUGUGAGCACUCCAUGAACCCCUUC  
>P4414  
ACUCAGAGAGGGGAGGAUGGAGAGUCAGAGAGGGGAAGAUG  
>P4415  
AGUUGGGCGAGGGGCCAGAAGUGGAAGAAGUUUAGGGAAG  
>P4416  
CCGUGGAGCAGCCCCUGUAAACUGGCUCGGGCGCCCCACG  
>P4417  
CGCGCCGCGGUGGCACCGUCACUCCACGCUAUCGCUUCCU  
>P4418  
GUCGUCUUUGCUUCAGCCGCAGUCGCCACUGGCUGCCUGAG  
>P4419  
AGAUCUGGUGGUGGAGACGGAUUAAGCCACACUUGGAACAG  
>P4420  
CUGCCGGGUUCUGGGGGUGCAGGAGUCCUUCUGGGCGGGGA  
>P4421  
GGUCCUGAACAGGCUCCAUCAGGUGCAGAGGAUAACUCGGA  
>P4422  
UUGCGAACGGCUUAACCUACAGAUUGAAGAGGUCGGAAGCU  
>P4423  
ACUCUUUAUUGCCUCUGAUCACUCCUUUCCCUUCCUCCAGC  
>P4424  
GGCGCUCCCGGAGGGCCUGCACCGCCUCGGCUCCCCACACC  
>P4425  
AGGACAAGGACCGCACGGAAAGCUGCUCAAGGAGGUGCUG  
>P4426  
ACAUGAACAGAACAUGGCCAAGAAGGAUCUGGGGGAGCAGC  
>P4427  
GCCGCAGCGUGGUCUCGGUCAGGGCCUCGCGAAGCCGCUCG  
>P4428  
GCUUCUUACGCUCGGAGAGGAUGCGCACCUUCAUCUCCCGC

>P4429  
GGAGGACGAGGAGGAGGAGGAGGAGAGACGAGGAGGGCAUUGGCU  
>P4430  
CGCCAGGUGAGAAGGGGAUAAGAGUCGGGCAAGCAGCUUCA  
>P4431  
GAGCAGGAGCAGGUGAGGGCAAGGCAGGCGCGGGGAGCCUG  
>P4432  
AGGGGCCGUUCCGGGCUCGACCCCGCACCUUCCGGGUAAG  
>P4433  
UUGGGAAGAGGAAGAGGACGAGAUGACGACGAGGAGGACG  
>P4434  
UGCCGCUCCCCAGAACCUGGACCUUCCUCCAUCCGGAUC  
>P4435  
GAGGACCCUUCUCCGUGGC AUUAGAAGGGGGAGGGGUGGC  
>P4436  
ACUCAGCCGAUCCGCACUCUAGCCUCUGUGUAGAAGGAACA  
>P4437  
GCGACCAGCGGCGUCGCCGACCCUCAGAUCGCCUGUGUGC  
>P4438  
AACCUAGAAGGUGGAGAGGAUCGUCCUCGGUGCCCAGAGG  
>P4439  
CCUAGCUGGACCGCCGAGGGACAUCGACGAGUAUCCUCCUC  
>P4440  
CCCCUGGAAACCGGACCCGACCCGCGGGUCCCCAGCCCAGA  
>P4441  
CCUCCGCACCUGGCACGCACACGCCAUACACGUUAACCUGU  
>P4442  
CGAGACCCGGCGCCAGGCCAGCUUCCGGGUCCGGCGCCG  
>P4443  
GGCGCCGAACAAUAGGUCCAUGAUGGUAGAAGCUCACUGG  
>P4444  
ACAGUGCAGUUUCCGGAGACGCCGAGCCCAGGGUCCAUC  
>P4445  
CGAAUGGCAUCUGUUUCUGCAGUUUGAGGUGUUAAGGCACG  
>P4446  
ACAGAAGCCGGAAUCGGAGAGGAACUGGCACCCCCGGGGA  
>P4447  
CCUCAGCACGUUCUUCGGAGACACGGCCGCCAGCCACUCCU  
>P4448  
CCCGAAGCCCCAGGUCGCGACGCUUAGGGCCCCAACGCU  
>P4449  
GGCCCGGGCCGUGCCCGGACAAGCGCGCCGAGGCCGGGA  
>P4450  
GAGCACGCUGGUGGGAAAGGACCCGGGACUUGAACAGUGUU  
>P4451  
UUGUUUUUCCUCAAGCAGGAAAUCUAAAUCAAGGACCAA  
>P4452  
CUUAGGUGCUGGGCCCUUGGAAAUCGGCGUGGGGGGCGG

>P4453  
UACUUUCAGAGAUGGGUGUA AUGCCUGAGAUUGCACAAGCU  
>P4454  
GGAGGAGGAACGAGGGGAGA AGGCGGAGAGCAGGAACGCGA  
>P4455  
CGCCUGGUGCAUGGGAGGGG AGCCGGGCCAGGAGUAAGUAA  
>P4456  
CUAAGCGUUUUUCUAAUUCA AGUUGUUUCUCCAUCUUGU  
>P4457  
CUUUUCCCCGCGGUGCCGGGA AGGUGGGAGAAAAGGGAAGU  
>P4458  
GCAGGGCCCUUCCUCGCGAC ACCCGAAGACCCGAGCGGGUC  
>P4459  
GGGGGCCAGGCAGAGGCUGA AGGAGAUGCCCCGGGCCAG  
>P4460  
GGGAGCAGCAGCAGGAUUA ACACUGUCAUCGUCAAAGGUA  
>P4461  
CCGGCCAGGGCGGCGGCUC CAGCCGGGAGGGCGACGUGGAG  
>P4462  
GCGACGGGGCCGAGUUCACC AGCCGCCGGGCAGUAGUCGA  
>P4463  
AGCUGCAGCUUCGGAAGGAA AGAAACAGCAGAAGAAGAA  
>P4464  
AAGGAGGAGCAUGAAAAGAA AAAACUGGAGGAUGGAAGCCU  
>P4465  
GACAGCGGCUCGUGGGGCUC AGUAGAGCUGGCGCUGAGAG  
>P4466  
GUGAAACAGGAGCCCCUGGA AGAGGACAGCCCCUCGUCCUC  
>P4467  
GAAGAUGAGGAUGCCGAAGG AAAAGAUGAAGAAAAUGGCGA  
>P4468  
GGAGGAGCGGCGGCCAGG AGGAGGAGAUGGCAGCCGGGG  
>P4469  
AUACCUGCGUUUGUCCCUCC AGCAUCUGCUCUGGCUCCAUG  
>P4470  
GGAGCUGAUUACCCGCGCCC AGCCGUUCGUUCUUAAGAGC  
>P4471  
GGGAACCAAGCGACGGCGGC AGCCACUGCUACGGCGGGGGC  
>P4472  
AUGAGGUCACACUCCAUGCU ACUGUGGUAUUCAAAUUUCCG  
>P4473  
GCAGUUCUGGGCUCCUCGC ACUUGGACUCGUCACAGGGCA  
>P4474  
GGCCCCGGCCUGCAGCUUGG AGGAGAAGCUGAGCCUGUGCU  
>P4475  
UCCUCAUCCUCCUGUCCGG AUCUUCUACUGCCUCCUCGGG  
>P4476  
CGGUGGGGCGCGGCCUCGG AUGCCGCCGGCCAGUCCUCGC

>P4477  
CCGCCACCGCCACCACUCCC AUGAGAUUUACUGGCGUGACU  
>P4478  
UCUCCGGCAUGCCCUGAAAG AAGCGCACGAAGCCGACCUCG  
>P4479  
UGAAGCCUAAAUAAGACA A GAUUAAGAGGCUUGAAUUGG  
>P4480  
GGUGCAGCAACAGCAGCAGC AGCCCCGCAGCAGCCGCCGC  
>P4481  
CCAGCUUGUCCUGAUAGGGG AAAUCCACCUUCCAGAUCAGG  
>P4482  
GCUGGAGAAAGCGGCGGCGG AGGAUGGAGGAAGGAGGCGGC  
>P4483  
GCACACCCUGGUUGAAGCAG A CAUUGGCAUCCAGGCAGAGC  
>P4484  
AUUAUUUUCAGAUCCUCCUG ACCUUUCUCCUGUUCUUGUUC  
>P4485  
UGAGAAAGGAUAUGAGGACU AACAGAUACAAAUAUGGAG  
>P4486  
AGGCCUCAGUGGCUCUUGUC ACCCCUUCUCGCGGCUGAACC  
>P4487  
CCCGGCGACCGCCGCAGCUC ACGCUCCAUGCGCGGCGCCCC  
>P4488  
CUCUCUCCUCACACAUGC ACACCUUGAGCCCCUCCUAA  
>P4489  
CCUCCAGCCUCCACGUCGC ACCGAGGCUGCUGCUCACGG  
>P4490  
CCGCGCGCCGCGUCCACGU ACCCCGCCGCGCCGGGCAAGA  
>P4491  
CAUGGUGCUGCUGCUGAC AGGGCUGUGAGCAGCCGGCCU  
>P4492  
CUCCUGCGCCAGGCCCGGAG ACCCCGGGGCGGCUUCCAG  
>P4493  
CUUAUUUUGAAAUCCACACC AAUUGUGCUGAUGUAGCUUUC  
>P4494  
GCCACGGGUAUUCGAAAGAA AGGAAUGAGAUAGGCUGUUC  
>P4495  
CCGUCGAGCCGCACAACCU ACAGCCACCGCCGCCCGGCCG  
>P4496  
ACGCCUCUCCACCAUAUAU AGAGGCGUCUACCGUUGGCCA  
>P4497  
CAGCACCCGGCUGCUC AACG AUCCAUUGGUCACGGCUCC  
>P4498  
GUAACCUCUGGUCAGCCGAG AAACCCACUAUCCUGUAGCC  
>P4499  
AUGAACCACAUGGCGCCCCC ACCCGCCCGCUCCCCGGCCAC  
>P4500  
CGGGCGACAGCAGCGAGGCC AGGAGCGGGGCCAGCGUCCGG

>P4501  
CUACCCACAGGCUUGCUAUGAGCAAGAGACACAACCUCUC  
>P4502  
GCGCUUUUGGCCGACUUGGC AUUGGGUGGGCGGCUUCUUGG  
>P4503  
CAGCCUCAGUCACUGGGAGAGAACCUCUCAUACCCUCGG  
>P4504  
CCACUUCUCCUGCACGGACCAACGCCCGCCGACUCGGACU  
>P4505  
GUUGGGGUCACUGAACCCCGAGCAUGCCUGACGUCUGGGAC  
>P4506  
GACAGGUCGCAUGGCAGGGAAGGCCUGGGUGCCCCAGAGAC  
>P4507  
GGGAGGGGCCAUGCUGUGUGAGACCAGGGGACCAGAGGGAU  
>P4508  
GUGCAUCUCCACUCCACCCCACUUCCCAUUCGAAACACGGA  
>P4509  
UCACUUUGCAGGUUCCGCACACGAUCAUUUCCUCCACCUUC  
>P4510  
UUGGUUCGCGUCUCCUGCUCAGGGUCCGACGGCUCGCAGUC  
>P4511  
UGCUCUCAUAAGUGUCGUC AUCAGUGGGCAGCUCAUAGCG  
>P4512  
GAACCACGGCUUCGUGCACC AUAUCCGACGGAACCAGAUCG  
>P4513  
CUCUUGGGGUGUCGGAAUUCAAAACGGACCUGGAGGAUGUU  
>P4514  
CGCGGCAGCUCGAGUCCACCAGCAGCGCCGUCCGCUUGACC  
>P4515  
AAAAAGUGAAACGAUCUGUGAAGAUGCUGCCAAGAAGGGC  
>P4516  
GGAGGGAAAAACCAUAUUAAGGCCCGAGACUGCUCUCCUCC  
>P4517  
UCGCUCGUUUUAAGUUUCAAAUUGACAUUCCAGACAAGCG  
>P4518  
CGAGCCCAGCAGCAGCAGCAGCAGCAGCAGCAGCGCCCGUACC  
>P4519  
UGC GAAAGAGGGAAGAAAGA AUUCGAUCCGUGUCUUGGUGG  
>P4520  
GCAGGCGGCAGAGGAAAAGAAGAAAUCUGGGCAGUGUGAC  
>P4521  
GCCAGUUGUGGUGCUGGUGCAGCUGGAGCGAGAGGAGGAAG  
>P4522  
UAGAUGAUGCCCACCAUCUCAUCAUUGCCUCCGACAGCAG  
>P4523  
CGGCUCGGGAUGGGUCCAGGAUGUUACUCCUUCUUCUUUG  
>P4524  
CAGCAGGACAGCUGGCCUGAAGCUCAGAGCCGGGGCGUGCG



>P4525  
GGACCUCCGCGCAGACUCUCAGCGCCUCCCGCCUCUCCGCA  
>P4526  
AAGCGCCGUCAUGCCUAAGUAUUAUGAGGACAAGCCGCAGG  
>P4527  
GUUCUACUGCCCGCUUUAGCACAGUGGCUGCAGCUGUGCUC  
>P4528  
AGAAAAAGCGAGAUGAAGAAAAGCGAAACUGCGGAAGCU  
>P4529  
CCGCCCGCGGCCCGCGAGGAGAGUACCGGGCCGGCUCGGC  
>P4530  
GUACAGUGGGAGUGAGGAAGAGAGGAGGAAGUGCCUGAAC  
>P4531  
UCCGCUCUGCGGUCUCCGAGACCAGCCUCGGGGCCGAGUUC  
>P4532  
UCCCGCUCCACAGCAGAGACAAGCGUAAAGGCUUUGAUGCU  
>P4533  
UUUGACCUAGCAGUAGAGCCUACGUCAGAGGCUGGGCCAAAC  
>P4534  
CAAGAUGGGGUGGCUUCACCAGCUACCCUGGGACCGGGAA  
>P4535  
AUGGAGGAAGGAGGCCACAAACCUAGAAGCUGGAGCCCUA  
>P4536  
GUCUGCACAGGCACCACCGAAGGCACACGGAUCUCAGAGGG  
>P4537  
UUGAAACUAAAAAGCAGCGACCAUCCAGUCAUUUAUUUCC  
>P4538  
UCAAUUGGCUACCGGAAAAAACAGGCUGGGCUGGGCGCCG  
>P4539  
UUCAGUUUCCCUUGGCUGCAGGUACUCCUGAAGCUUUCU  
>P4540  
UCAGGACAAUCCUCCUCCGCAGGAUCCUCCUCCUCAUCCGC  
>P4541  
AGGCUGCUACACACAUGCAGAGUCAUGCUGGUGGCCUGGA  
>P4542  
GGGAAGCCGAAGCAGUAGCAAGAAAGCAGCAGGCUCGGUCG  
>P4543  
GAAUCAAGACUGACGCUUCACGGUACCACAUCUUGUCCU  
>P4544  
GGAGUUCUUGCAAGUCGGCCAGGAUGUCUCAGGUACAGCGC  
>P4545  
ACGCCCCACUCUUCGGCUUUACUCCUGGCCUCCUCCACAGG  
>P4546  
AACCAGCGCAAUCAAUCGCAACGGCCGCCGUACCGCCGCG  
>P4547  
GCCGGGGCCACCCUCCCAAGUCCCAUCUCAGGUAGGAG  
>P4548  
CCGCCGGGGCUUCCAGGUCAAAGAAUUCGCCUUGCCGCUA

>P4549  
UAGUGGUGUGGUUCUUUCAAAAGGGAGGUCAGGGUCA AUGGG  
>P4550  
CCAGAAGAUCCAGGACUAUAACAGGAUUCAUGAUUUCAA  
>P4551  
CCUGCUACGAUAAGAGGCUGACCCUCCGAGCCCCGCGUCUC  
>P4552  
UUCCCUUUCGUAAGACUCUUACUUGCACCCACCCAGCCCCG  
>P4553  
CCUUUGGCCUGCCUUACGGAAGCCUGCGAGGGAGGGUGGUG  
>P4554  
AAGUUGUAGUACGGGUGGGGAGAACCACACUAAAGGGAGAU  
>P4555  
GCCGACUCCACCCUGGCUGGAGGAACUGGGUGCUCCUGCCC  
>P4556  
CUAGGCCCGUGACUGAGGAAUGCAGUCGGCAGCGAAGCAC  
>P4557  
GGCGCCGGCGACCUGAGGGGAGAGGGAACGCAGCUGAAAGC  
>P4558  
UGC GG CACCCG CAGCCCGCC AAGCUCUCCACCGCGCAGGGC  
>P4559  
GUCCUCUACCAUUAUGUAGGACAAUGCUAAAAACAGAAUAC  
>P4560  
GUAGAAGUAAAGAGAAGUCUAAACAGUUAGAAUCAAGAGU  
>P4561  
GCCGCGCCACAGGCUCACAAACAGCAACAGCAACGACUCCA  
>P4562  
GCGGGCGAUCGGUGUGGCCGAGCCGGGCUCCGCGCUGCUCC  
>P4563  
CAGUUUUUGGCAAAGCGGAAUACUUAAGGCCCCUGGGUUG  
>P4564  
GAUUAUAUGUUUCUAAGGUCACAAACAUGUCAGACAAAAGU  
>P4565  
CGGCGGCCAUGGGCGGACGCACGGGGAGGGGAGCGGGGACC  
>P4566  
GCGGCGGGAGAGGAUGCGGGAGCGGGCGGCGGACACGGCCG  
>P4567  
UGGGAGUGCGGGACGCCUCAAAUGUCUCCAGUGGCACCC  
>P4568  
CGCCAGAACCGCGCGGCUGCAGUCACCUCGAGCAGGCCGGC  
>P4569  
AGGGACGGCUCAGCGGCUGGAGGAAGAGCGGUGCGGAGCGA  
>P4570  
CAAACAAAUGAUAGGAAACA AAAAGAAAGAAGACAAGAACA  
>P4571  
AGAUGCUUCAACUGGUCCA AUAACAAGUACCCAAUGCUC  
>P4572  
UUUUGGCUUUUGUAGGUUUC AUCGAUUUCAUAGUAGAGCCA

>P4573  
GUUUCACCAUUCUUUCCAGGAGGACCCUAAAAACAAGAACA  
>P4574  
GACCUCCUCUUUCUCCAGGC AUUCCUUGCAGACCAGGAGUA  
>P4575  
UGUCAUCUCACCGCCCCACCACAGACCGCGUUCCTCCGAGGA  
>P4576  
UUGGGGGCCGGCGGCCCGCCAGGCCGGCUAAACGCAGAAUG  
>P4577  
AAGCCUGUCCCAGCAAUGUAGCUCCACAGUCCCCUCCUGC  
>P4578  
GCAGCGGCUGGAGGAGCGCGAGCGGGCGUUUCCUUGCCCCGG  
>P4579  
AAAAGGGCAAUUGAAAGUCAGGAGAAAAGCGCAAAGAG  
>P4580  
AGCUCUUCUUCUCUCAGGCCACCAUGUUUCAGAGUACCUUU  
>P4581  
ACCACAGCCUGGCAAUCCCAACCGGACUCCAGUGCCUCC  
>P4582  
GAGCCGCCGCCGCCGCCACUGCCGCUUCACCGACAAGC  
>P4583  
UCCAGUGGGGGGUGUCAGCAGCAGCCCCGCUUCCGAUUC  
>P4584  
AACUAGGCCCUUGGAGGCGGGAAGAGGAUGUGUGGGUGGGGU  
>P4585  
UGUGCGACCGCCUCCGGCUCAGCCGCCUCUAGGAUAUUGGG  
>P4586  
AGCUCCAGAGAGACUCCCCAACCCUGCCAUGCCUGCCUCCAC  
>P4587  
AGGCAGAGGAGGAGGCGGCCACGGCCGAGGCGGUGGGACGC  
>P4588  
AGGGAGAGGAGGCCCGGAGCACCCUGGAGGGCAGAGACAAG  
>P4589  
GGCGGCGGUGCGCUAGGGGAGUGGGCGGUGAGGCCUGGUC  
>P4590  
UAUUGCCCAAGCGGAGGAGAGAAAAAGGAAUAAGAAGGAG  
>P4591  
UCUCUGACAGGCUGUAGGCCAUGGCCAGCUGCAGGUCCUCA  
>P4592  
CCCGCCCCUGUGUUGGUCCCACAAUCCCUGGCAAUGAGAGG  
>P4593  
GCACAGCUGCCAGGGGCUGGAGCUGGCCCGGGAACUUGUUC  
>P4594  
CAGGGCGGAGCCACAGGAGGAGGAAGAGGAGAAGGAGGGGA  
>P4595  
UCGGCGGCGGGGAGUCGGAGGACGCAGCCAAGCGGCGGC  
>P4596  
AGCAGCUGUGGCUCACGGAGACAACCACCACCCAAACCCAA

>P4597  
GGGCCACUGGCGGUUCACGGAGUCAGAAAAGAAAAGGACA  
>P4598  
AGUGACCCCCUGGAUUGUUUUUAGGCCGGUUGGACAUUGG  
>P4599  
GCGCGGCAGUAAUCCACUAGCUCCCCCACCACCCAG  
>P4600  
GCGCAGCCAUGGUGAAGAUUAGCUUCCAGCCCGCCGUGGCU  
>P4601  
AAGAAAGUGUACCCUCCAAGAAAAGCUUCUGAGGACUUUU  
>P4602  
UGCUGCAGAAGCUCAGGGCCAGUCGCCGCCGCUUCCAGAGG  
>P4603  
CGCUGCUCGCGGAGCAGCCAUUAAAGCCCAGGCAGCCGCC  
>P4604  
CCAGUGGCGGUGAUGGCGGAAGCGCCUUUAGUUUCAAAAA  
>P4605  
ACGCCGAAGUGCUGGAGCUGACGGUGCGGCGGGUCCAGGGU  
>P4606  
GCUACCUGCACGACAUCAUCACGGAGGUGGGCGCCGGGGAC  
>P4607  
ACAGACACAGAGAAGGGGAGAGAGAGAGCCAAAGCCCGG  
>P4608  
GAGGAGAUUGUACGUGAGAGAUAGUCAGAUCCGCGUGUAG  
>P4609  
GUCCCGGCUGUCGCCGCCGAGCCCGCGCGCCGGC  
>P4610  
GAUCCGCAGCAGCAGGAUGCACUGGCCCGCCUGACCCUGGA  
>P4611  
UGGGACAGGGCCUCCCCACAGACACGUGACAACAGAUCAA  
>P4612  
AGCCCGGGCACAGGAAGGCCACGUCCCCGGGGAGGGACGCC  
>P4613  
GGCCAAGGCCCGCGAUGGUGAUCUGCUGUGCGGCCGUGAAC  
>P4614  
AGCUCCGGAAGGCUGCGUGGAGACGCCAGCGGCGGGCGGUG  
>P4615  
CGCGCUUUGAAGCAGAUCUGAAGGACAAGAUGGAGGGCAGU  
>P4616  
CGCCUGCCACCUGGGCCGGCACCUAGACGGCGACCAGGCGAU  
>P4617  
AUGGAGUUGGAUUAAGACAGAGAUGGCUGGAAGAAUUGUG  
>P4618  
CCUGCUCGCUCGGACACCCCAGCGCCUCACAGAGACCCCU  
>P4619  
CACUCCCAUGGCGGCGGGACGCUGAGCGGGCGGGCGGCG  
>P4620  
CACCUUUAAGAGAUCAUCCACCAGCUCGUUGGACUUUUC

>P4621  
CAUUCACUUACUUGUCAAGCAUUUACUGAGAGCUAUCAAUG  
>P4622  
GGAGGAGGAAGGUGUCGAGAAAGCCAGCGGAAACUCACCUGU  
>P4623  
UCACUUCGCCACCAGCCGGAAGUUUUCUGUCACUGGACGC  
>P4624  
GCCCGCCGCUCCUGCCCGCGAGCGCUGCCGUCGCCGCCGUC  
>P4625  
CCUGCCACGCAGCUCCUGCCAGACACCGCCACUCACGCUCA  
>P4626  
GCGAAGGGGUGGAGAGUGAUUGAAGAGCGAGAGAAAAGAG  
>P4627  
UGCUUAUGCACCAAGGUCCAAGUUCAAAGCCGUAUGAGAAG  
>P4628  
GUGUGCGGCAGGGCGGGGACAGAACCGUCCUCUCGGGCUCU  
>P4629  
GACCUCUGUCCCAAGCAAGUAGAACUUUAGCCUUAGGAGA  
>P4630  
CCUCACUUCUCUCCUCAUCCACACCAGCAGCCAAGUUGUCC  
>P4631  
GAACUUGUGGAGAGACUACAAGUUUUGGUUGUUAUGGUCC  
>P4632  
CUUGAAGACUAAAAAGAAGAAGAUGGCUGCUGAUUAUJUCC  
>P4633  
GAUGGAAGUGAAGAUGAUGAAGAGGAGGAUGAAGAUGAAGA  
>P4634  
AGGGGAGAAAAGGGCCGAGGAGCCAGGAAAACCGAAACAGC  
>P4635  
CGUAUUGAGAGGAGAUACACAGGCACUACGAGAAUGGAGUU  
>P4636  
CUGGGGCGCGCCGCCACGAGACUGCAGGAGCUUCUGAAGAC  
>P4637  
GCUGGGCCUCGCCUCGUUGAACACCAUGCUCCCAACCGUG  
>P4638  
CGGCCAGGUGAGCGGGGCGCAUAGGUGACGGAGGGCCGAGG  
>P4639  
GAAUAGAAGAGGCUUGUGAAUGUAUACCAGAGCUGCAAU  
>P4640  
GCGACAUGGACAACGCGGGGAAGGAGCGUGAGGCAGUACAG  
>P4641  
GUUGGAGCUUGCCCGCGGGAAGCGAGUGGACGGGCCCUCC  
>P4642  
UCUACAGCAGCUGCGACACCACGGGGACUGGCUUUCUGGAC  
>P4643  
GGCCGGCGGCGAGCGAUGGCAGCGGGUGCUGCUGAGUCUGG  
>P4644  
UCGCUACGCGGGGCUACCGGAUCGGUCGGAAAUGGUGAGCG

>P4645  
AAUGAACUCGGCCAGACUGGAGCGGAACAAGGCCGCCCGCA  
>P4646  
CCUACUCGCCAGUGGACUACAUGAGCAUCACCAGCUUCCCG  
>P4647  
GAGCCGGAGGCCGGGCGCGGAGUUGGUCUCCGCCGCCCGAG  
>P4648  
CCGGCCGCCCAUCCGCCCAAGCCGCCACUGUGGCUGCCG  
>P4649  
UCGGCAGCAAUGUUGUCAACAUCCUGAAGUUGAGGCUCGG  
>P4650  
AGCCUCCUCCUGUCCAGCGAGAGCAGGAAUAGUGGUCCU  
>P4651  
CCAAGUCAAUCCUGUGGGCAACCAAUAAAACCAACUUUA  
>P4652  
GCAGCCCCGUUGAUGACUGAAAUGACAAAGCAUCCACCUA  
>P4653  
CCCGCCGGGGCAGCCGCCGACACCAGGACCGCGAGCCAGA  
>P4654  
CGCUCUGAGAAGGGGACCCGAGAUGGGGAGCGAGGGAGGGG  
>P4655  
CACAGCGGCUCAGCUCCUGGAGAGUGAGGGUUGAAGAAAGC  
>P4656  
UGAGUGCAGGGAAGUGGAGUAUUUGCUGGGCCGGUACCAU  
>P4657  
UGGGCCCCGGAGACCGCAGAACCGGCGCCAGCUGUCCCCUG  
>P4658  
CAGUGAACAUAAAGAUUCUGAAAAGAAACACAAAGAGAAGG  
>P4659  
CUUUCCUGAGGAAUGAAAAAGGGAUUGAGGAGUUGCCUGA  
>P4660  
AAAAAGUGAAUGCUGAGGAGACCAAGAAGGCUGAGGAGAAU  
>P4661  
AGAGCCAAAGGAACCCAGAAAGGCCAAGGAGCCGAAGAAGG  
>P4662  
CUUGC GGUCCGCCGUUCGACAACCAGCCUUGGGUCCCCGC  
>P4663  
GGGAGGGUCUGAGGAUUGCGACUCCCCGUACGGGUCCUUGAC  
>P4664  
GCGGGCGGCCGUGCGGCGCUACCUGCCCUGGGCCCUGGUGG  
>P4665  
GCGGGUCAAUCCGGCGGCGGGAGCCUCGUCCGGCAGCGCACG  
>P4666  
GGGAUGGCCCCCAAUUCCCAGACUCUGUGGAGGAGCUCCG  
>P4667  
CAGCGCCAUGGAGACGGUACAGCUGAGGAACCCGCCCGGCC  
>P4668  
CCGUCGCGCCCGCAUCCCCAGCUCCAAGCCGCCCCUCUCG

>P4669  
CCAGCCCGGGGAGGCGCUGGAUCUCGUCCUGGUCGGGGGCU  
>P4670  
CUUCCUCGAAUUGGGGAUCGAUCACGCCUUGAAUCUCGACU  
>P4671  
GUAACUUCUUCAGCUCCUCAAGAACAGCUAUGGCGGCAUUU  
>P4672  
AGAAGGAAAAAAGGGAGAGGAGAAGGGACGAAGGGAGGGA  
>P4673  
AGAAGAAAAGGAAGAAGUUUAUGAAGGAUGCCAAAAAAG  
>P4674  
UUGAGGAGGAAGAGGUGGUGAGGCCCCAGCGGCGGAAGAAG  
>P4675  
AGGGGAGUGGAGGGGUUACAUCUAUGCUUCGGCCAAGGGC  
>P4676  
AGACCCAGCUAACUGUGCCAUUCUCCUACUCCUUUCUGGCC  
>P4677  
CAGCGAGGGCCGCGACAGCGAGGGCCCGGCGAGGGCGAGG  
>P4678  
UCUGUGUGUGUGUGAGUGAGUGAAUUCAGAUUUUCUGU  
>P4679  
CGAGUGACGUCCUAGGAGCCACCGGGCAAGAGGCGGAGGAG  
>P4680  
AACUGCAGGGUGGCAAUGACACAGGGACGGACGAGGAGCUA  
>P4681  
UGCGGGGAUAAUUUGAUAGAACUUCAGUGAAGGCCGGGCG  
>P4682  
CCAGUUCAUGCCUCUUGGGGAUUGUUCUCCCGUCGCAACC  
>P4683  
GCAGCCCGGAGCCAGAGAGCAGGGGAGCGCCGCGCCGGCCA  
>P4684  
CCGCUUCUUGCGGUAAAGAUAUGUAAGAGUGGGGAGUUU  
>P4685  
CGGCCCGGCGCUCCUUCUCCACCGCGGCCCGACGCACCCCG  
>P4686  
GCUGGAGGAGAAGCAGAGAGAGCACGGAGGGAGCGGGCCA  
>P4687  
GCUCACCUUCCCCAGCCCCACUCAGCCAUGGAAAACGGGC  
>P4688  
AAAUUCAACGUGAGGAAGCAAGUGACAAGGACGCCCGAAGC  
>P4689  
AGAAGAUGCUAGAAGAGCUGACAAACAGAUCGAGGAGCAG  
>P4690  
UGGUUCGUUACAUCAGAAGGAUACAGUUCAUGACAAUGACU  
>P4691  
CGCCCUCACCUUGGGCGGCGACCCUCGCGGGCCUCGGCGC  
>P4692  
GAGUGCUGGGGCCGGGCGGUAGAGAGCGGGGCUCUCACUGG

>P4693  
UCUCCUCGUCGGUGGAGUCA AUGACGUAGAUGACGCCGUGA  
>P4694  
CGAAAACCCGAUUUAACAAG AACUACAAGGGGAUGAGUCUA  
>P4695  
GUUUGACUUCCUCA AUGAAA AGCUGCAAGGUCAGGCUCCUG  
>P4696  
ACAUGGGGCCCCGCGGGUGCC AGGCCCGCGCACACGCCCCUC  
>P4697  
GAUGGAUGAAAGAAGAAAAG AAAGACGGUAAAAGAAAUUGU  
>P4698  
GAUCUUCCUCCUCA AUCCCA AUCCCAAUCACGGCACGCAUG  
>P4699  
ACACACGAGGGACGCGCCCC AGGAGCUGCAGGUGGCAGCCC  
>P4700  
GCGGCGCGGGCAGAGCAAGG ACGCGGCGGAUCCACUCGCA  
>P4701  
AAUUUUGAGGCUCCUUCUG AUGAAA UUGAGCUGUCCAUG  
>P4702  
AUGAUGAUAGAGAUAAUAGU AACCGUGACAGGAGAGAGUGG  
>P4703  
UUCGCAGGAUGAGGAAAAGG AGGCGGCGGCAGCGCUGGUCU  
>P4704  
UUGGAUAGCUUCUGUCCUU AUCCACAGAAACAUUACAGGA  
>P4705  
GUUUUCAAGUGAAGAAAUC AAGUUUAUAGCAAAAAGAUAGU  
>P4706  
AGAGCGGGAACGCGAUGAGG AGCAGGAGCCGCCCGCUUGU  
>P4707  
AGAGCUGCAAAGCAGGCAGG AAGGGAGGAGGAGAGCCAGGU  
>P4708  
ACUGGAGAAGCAACUGGAAA AGCAGCGGGAGCUAGAACGGC  
>P4709  
CCUGGCUUUGUAGCUCGCUC AAGAUGGCGGCGCAGCCACCC  
>P4710  
CCGGUCUUCAGUCUCGAGGC AGACGCCGGGCCCCUUUCCGC  
>P4711  
AUCUUCUCGUCCCGGUCGGC AGUGAGGAUGAAGCGGUCAUC  
>P4712  
GGAGGACGCGCCCUUGGACC AGGGGAGCGGUGCGAUUCUGG  
>P4713  
UACAUGGCGGGCUCUGUGGG ACUGGCGUUGUGCGGGCAGAC  
>P4714  
GGGAGCGUCGUUCUCGGUCU AGAGACCGUGGUCGUGGCGGU  
>P4715  
AGCCCGAGCGAGCGGCGGAG ACCGUGCCCCCGCCUCGGCCC  
>P4716  
GGCCCCUGGGCUGAUCUCGG AGCAGGGCCCCGCUCAGCUGUG



>P4717  
CCGGCUAAGACCUGCCAGGGAGAUGGGACCCUUGUGCCACC  
>P4718  
CAAGGUCGGGGAUGGAGAGGACGCGACCCCCGCGGCAGUCG  
>P4719  
GAGCCCUGAGUUAGAGCUCCACGUUGGCCGUGGCUUGUGCG  
>P4720  
CUCCUGUGCCCCCUCCUCCCAGCCCCGGGCAGGCCUCGCCU  
>P4721  
CGGGCGCCUGGGCGAGCCCACGCAGGGGCUCCUGAGGGUC  
>P4722  
UUCUCCGAAUGCGAACUGUCACCUUUUGUUUUUCUCUGUCG  
>P4723  
GCUGGAGUGUUUGAAGGAGGAGAGCGCAGCAAAGGCAGAGC  
>P4724  
GGUGCCAGGUGGAGCUGGACAGGCGGCAGGCCCGCAGAGCC  
>P4725  
GAGAUGCUCUCUGGAGAGAGAGAGGGAGAAACCAGCGUGGU  
>P4726  
AGAGCGAGCUUCGGAGAAGCAGUGGUGGGUCCAUGUGAUG  
>P4727  
GCUGGGAGGUGAGUGGAGUGAGCUUGUCAGGGAGCUGCUGG  
>P4728  
GUGAGUCUCUCUGCUCCACCACCUCCAGCAUCUCAUUGAGA  
>P4729  
AGAGGAAGAUGUGGACUCAGAACAGCCGAGAUAGAAGGGG  
>P4730  
CCAUGCCCUUCUGAAAGGGAAGUGAAGAGGAGCUAGAGG  
>P4731  
ACCGUCCGCCACCUCUCCAAGGCGCCCGCGUAGCGCUCCA  
>P4732  
GCUGGCACGAGAUGUGUGGGACUGGGACGCUUCCUUUGGGG  
>P4733  
CCCAGGUUCAGCUCCGCCUGACCCUCCGCUUGGCACGGUCC  
>P4734  
CAUCUCAUCCCUCUGCCCCCAGUUCUGCUCAAAUCCCUGC  
>P4735  
GUCCCGUCAGGGUGAAUAUCACUGAAAAAAUCGGCUUGCC  
>P4736  
GCUCUGCCGCAGCGCCAGGCACUUCCUACACCACUACUACG  
>P4737  
CCUCUCAGGCAAUGCAACGAAGAAACCCCGCCGACCGCUCU  
>P4738  
GGAGAUGAAGAGGCUAGCUGAGGAAAGGGUGAGUGCCACCC  
>P4739  
GGCGCCGGCGCCAGACGCGGAGGGAAGGAGCUACGAGUAGC  
>P4740  
ACGGGCGGGGAGCUGGGGACAGGCAUGGACGUUCCGG

>P4741  
GCCCCGGCCCCGGGAGGCGGAGGCGGAGGCGGCGG  
>P4742  
ACCGGCAGCACGGGGGGCAGAUCGGGGCUGCGGCCUGG  
>P4743  
UAUGGCUGCACGUUGGCGCUACCGGACGGGAUGCUGUAUCC  
>P4744  
GCGGCGGUGGGACCCGGGCGACCUUAGAGACGGCGGCAGCG  
>P4745  
AGGCCCAUGAGGUCAUUCUGAAGGCCAAGGACUUCCACCU  
>P4746  
GACUCAACGGGUCUCGGCUGAGCCACCGGGUGAGCUCACCG  
>P4747  
CAUCUUUCGCAGCGGACCGAAGAGAAGAAAAGUAGGCCAGA  
>P4748  
GGCCUCGCUCGCGCCACAGACCCACUCACAAUCCUUGAU  
>P4749  
GAGCGCGCCCGCAACCCCGAAGGCCGGUCGGGGACCCCG  
>P4750  
CAGAUCGGUCUGAGGAGACAGCUGACCUGUUGGCUGAAAA  
>P4751  
CAGCUCCUACGUGCUGGCGGAUGCCAUUGACAAAGGCAAGA  
>P4752  
UGGUGCCC GCGGGCGCAGAAAGGCUCAGGGCGCAGGUCCGC  
>P4753  
CCCAUCGCUCCACGUUGAGGAGCCGACUAGGGCCGCGGUA  
>P4754  
GAAGCAGCGGCUGGAGGAGAAGCAGCGCCUGUCGCGGCC  
>P4755  
UAGCUCUUUCGGGACCCGACAGACGGAUUAGACACGCGCAG  
>P4756  
GGCGUUAGUAUUGGCCGUGUACCCGAAAACUGAUUGACUG  
>P4757  
AACUAGGGAGGAGCCAUCCCAGCCAUGAGCCCUGUGGGAA  
>P4758  
GCUUCAAGCAGAGGCAUGGAGGGCACGGCUCACACGGACC  
>P4759  
AGGGGCGGGCGCUCUAUUCAGAGACCGAGUGGCAGGGCGG  
>P4760  
AGCAUGCCCCAGGAUUUGUCAGAGGCCUGAAGGAGGCCAC  
>P4761  
CCCCCAAUCUAGCUAUUUAAGGGUGGGUAAUUGAUCUCUC  
>P4762  
UCACCUCUCAGCAGUUUCCAGGCACCCACACUGUCCUCC  
>P4763  
UUGAUGAAGUUUUUAUCCACAUAGAGAUACUUAUCGGCAGC  
>P4764  
CAGCCCCUCAGCACAGCCUACCCAGAGGGUUCAAGGAAGG

>P4765  
UUGGUGGAAGGGACUGAGCAAGGCCUGGCAGAGCCCUGGG  
>P4766  
UAGUAUUGCAGACAUGGGCCAGGAGCCAGAGGCCAUGCAG  
>P4767  
GAGCCUGCUGCUGGUCCCAGGCCAGCCUGCCUGCC  
>P4768  
CAAUGUGAAACUGCUCACGGAGAUGGUGAUGAGCCACAGCC  
>P4769  
CGACGUGCUGGGCCGGGCGCAGGGGGUCCUGUUCGACUGUG  
>P4770  
CCCAUUACUAUGUGGAGAGCAUCGCAGACUUGACAGAGGGG  
>P4771  
AGUACCUGACAGGCUUCCACAGCGGAAGGUCGAGCGAAAG  
>P4772  
ACCCGAAGUCAGCGAAGGAGAGAGGCCUCAGCGUCAGUC  
>P4773  
AGGGCUAGAUGACUUGGAGAUGCCGAAGAGGUCAGUAUUC  
>P4774  
CGAGUUUCCGAGCCUCAGAUCCAGGAGAUACGCACAGCC  
>P4775  
CGCGCCGGGCGGCUCGCGCAUCCUCCGGCAUCCGCCCCGG  
>P4776  
GCGUCUCCCGAACCCCCAGCAAGGACUCUGUAGCCCAGAGU  
>P4777  
UGGUUCAAAGAAAUGGAAGAAAAGGAGCGAUGUGACCGAU  
>P4778  
AAGACCCGCUCGCCACUGCAGACAGCUCCAUCUUGCUCAG  
>P4779  
AAGAGAAGCCACAGCGCUUCAGAAAAGAGUGGGACAGGGAC  
>P4780  
CAAGCGUAUCUAAGAGGCUGACAUGAAUCCACAGAUCAGG  
>P4781  
UCCAAUCUAGAAGUCUCCAUCCUGCUAUCUAGAGCUGG  
>P4782  
CACGCCUCCGCUGGCGGCGACUUCUCAGCUCCGUGCGCCC  
>P4783  
CGACGCGUGAGUUAGGCCGUAUGCCUUGGCUGCUCUCAGC  
>P4784  
GGACAGGCUGGGGAGAGCGCACUUGAUUGGAGAGAGAAUUA  
>P4785  
AGAGGUAUGAUUACGUUAUUUUUAUUAGUAAUAAUAGAGU  
>P4786  
CGGCAAAAGAUCAAUCAGGAUGAUGUUUAGCCAUAGCUCC  
>P4787  
AGGAAACUGAGGCCAGAGGGAGGCACUCUCCGUCCACAGCU  
>P4788  
AAAAAGAGAAUAGUGUAGAGACCCAGGCCUUGGAUUGGGGA

>P4789  
CGGGUCUUUCCAUAUCUUUACUUUUUAACAGUCUGUUUCU  
>P4790  
CUCAGGGCUCAGGGGGCCACAGGAGGCAGGUCGGGAGGAA  
>P4791  
UCCUCGGCGGCCUCCCCACAGGCUCCAACUCUGCAAGUCA  
>P4792  
GGGGCCUCAACACCGACAUCACAGCCGCAGGACCAACCGUU  
>P4793  
GGGCUCUCCGAGCGGGCCUAGCUUGAGGAAAGAUGGCGAU  
>P4794  
AGAGCUACAGCUGGGCUGGGAGCAUGUGUGGCACUGUAAG  
>P4795  
GCCUGUGUCUUUUUCCGACUGAGGCAGCCAGCUUGCGGGUGC  
>P4796  
GCUCCGCCGAGCAAGCCGAAAGCAGUCGAGACCCCGCGAGC  
>P4797  
GCCUCCUCUCCUCUCUGGGAUCUUGUCCUUCUCCCAU  
>P4798  
UGAGGGGCAGGAGCAUGAUGAGCUGAGCUUCAAGGCUGGUA  
>P4799  
UCAUUUAUAGGUUUGUCUACAGAUUUUGAGCGUUCGAAGUU  
>P4800  
CCACCGACAUGCUGGACCUCAGCUCUUGCACACCCGAGCCG  
>P4801  
UGACCGACCUUCCUCGCCGGAACUCCUCGCGCAUCGCCGGC  
>P4802  
GCCAGUUCCUCCACUCAGCAGCAGCCUGAGAGCCCAUGCU  
>P4803  
CAGUCCCCUCCCCGAGAACC AUCCCCUUGCCCCGCCAGCG  
>P4804  
UCGCGGCUCGAGGUUGGCACAAAGAGGGAAAGAAGGAGG  
>P4805  
GAAUUCGCCGUUUUGCCGCGAUUUGGCGUUAACUUAUUGAC  
>P4806  
CGCUGUCCACGCCGCCGACAGGGCGCACACGACGUGCCGC  
>P4807  
UACAGACCCCAUGUUCAUCCAGUGAGUCCAGUUCUUCAUA  
>P4808  
CUCAGACCCGCGGCCAGACACCCCGAGUGCACCCGGCCCU  
>P4809  
GACGACGGCGGCGGGCGGACGCUCCAUUAUACCGCGG  
>P4810  
AGCAGGACGGCGGAAACAGAACAGAGCCC GAAUCUAAAGUC  
>P4811  
UCGGCACGGUCUACGCGGGUAGCCGCAUCGCCGACGGGCUC  
>P4812  
CGAGAGGAGACGGCCAGGAGAGGGUGCCACUCCGAGGGUCG

>P4813  
GACUCGAGGACGGCGCGCUC AUGGCCCGGCCCGGCCUGG  
>P4814  
GGUGGGCGAAGCGCGCCUCC ACGUCCUCAUGUCCGGGAGG  
>P4815  
CCCGCAGAGCCGCGCCUUC AAGGAGGCGCUCGUACUCUCCG  
>P4816  
GCCACCUGGUGCCCGCUCGC AUGACCGUGCGCGGCACCGAC  
>P4817  
CUUUGGCCAGGCAGCCGCCA ACAGCCCCGCUUCCGGCCACA  
>P4818  
AAAGAAUUA AAAACUGGUGA AAGCUUGACCUGCGCCCCCA  
>P4819  
UCCGUUAGGAUGGAAGCGGA ACACCCACACCUCUCUCGGC  
>P4820  
CCAGCAUGAUGGCGGCCGGG AAGCGAGAACGGACGGGAGGAC  
>P4821  
CCCGCGGCCCGCGCGACC AUGCAAUGGCGAGCGCUCGUC  
>P4822  
CUCUCUCCCCAAGCUGAAAC ACCAGAAGAGCCACACUCGGC  
>P4823  
UGAAUUGCUGCAAUCUCAUG AUCAAUUUGAAUGGAUGAGG  
>P4824  
GCUCCGCCUUUCUGCCCCC ACCCCCACCUCACGGGUACGG  
>P4825  
UCAUGGACGCCUUUCGCAAG AUCAUGGCGCCCGGCAGAAG  
>P4826  
CUAGAGAACGAGGACUCUGA AAGGCGGGACAUUUGGGCGACC  
>P4827  
GCGGCCCCUCGGGAGCUGGC AAGCGCCUCGACCGCCAACUC  
>P4828  
GCUCCAGCUUGGGAUUUGG ACUCAGGACGGCCGAGGAACC  
>P4829  
AGCUUAUCAAAUAUGGAGUU AUUAGCACUAACGUUCUGAUU  
>P4830  
CCUGAAGAAAAAUUGGAGUC ACUACUCUUUCCUAAAAGUUU  
>P4831  
UGACCUCUCCUCUCCUCUGGC AAGGGCGGGCUCUCCGAAGCC  
>P4832  
GGACCAUCUGCUGAACCCCC AAGGAUGACUGCAGCCUCUUUU  
>P4833  
CCGUUGCCGCCAUGCCCAUG AAGGGCCGCUUCCCAUCCGC  
>P4834  
UCGCCGUCUCCCAGGGUUU AGCACAGUACCUGGCACACAC  
>P4835  
CUGCAUGGACGCGGCACUGA AAGCGGAGCCGUCGGAGGAGC  
>P4836  
UUCUCCUUUACAGCCCCGA AACGCUCACAGCUGGCCGACU

>P4837  
CGCUGCCGUGCCGCGCCGACCGGCCACUGCUCCCGCCC  
>P4838  
AGACAUAAGAAGCGAAUGAAAGAGAAAAGGAAUAAAAACU  
>P4839  
GCUAUCUCCUCCUCCUCACAUUUCAAGGCUCUUCGAAGCU  
>P4840  
GGACCAGCCACUACCACCCAGGUCAGUGCCCCGUUGCCGC  
>P4841  
CGCCGCGCCGCGGUGCGAGGGGUGCUGGGCGGGGACCC  
>P4842  
GCCCAAGGGCCGCCAGUGUAAGUCGAGGAUAAUCCCGGCG  
>P4843  
GGUCUGCAGCAGAGCUCGAGACAGGGAUCUGAAUGCACUUG  
>P4844  
GGAGAACUCCCCAGCCCAGCAGGCGGGCCUGGAGCCCUACU  
>P4845  
AGAAAACGGAAAUAUAAGAAAACGCUUCGCCUGGGGUU  
>P4846  
CCGAGCCUCCCGGUCGGCUAAGAUUGCUGAGGAGGCGGCG  
>P4847  
CCACCACUGCCGGACCAUCAUUUUCCGAGUCCCUCCGGCC  
>P4848  
GAGGUGGAGGCACCGGCUGCAUUGUUUUCGGGAUCGAGGGG  
>P4849  
AGGCACAGUUAGACGAUACCAGGUGCAAGAGGGCAGCCAG  
>P4850  
CAGGCAGUCGUGGGCCAGCCACCAUGUCAGGGGGGAGGCUG  
>P4851  
AGGGGGCCAGGGCUGGGGAAGGCAGAGCCCCUGAGUGGG  
>P4852  
CAGCACUGACAAAGAACAACAUGUGCAGGUACCUGGUAAGA  
>P4853  
GAGGACGAGGAGGAAGAGCUAGAAGAAGGGACCAUAGAUGU  
>P4854  
ACAGCAUUCAGCAACGAGCGACCUCCACAGCCAAGACUUGG  
>P4855  
UCUGGGUGAAGGCAGAGGCUACAUGGGGUGAGCUUGGGCG  
>P4856  
GCCCCCAGGGAGAGAAGGAUCCAGGACCCCUGGGGCCA  
>P4857  
ACCUGGGGACCCUGGAGAAGACGGGAGGAAGGUAAAGUCCC  
>P4858  
CCUCAGGGUGCUGCAGGCAAAGCUGGGGACCCAGGGAGAGA  
>P4859  
UCGGGGGCCUGUGGGUGAAAAGGGAGACCAGGGAGAUCUG  
>P4860  
GUUUCACAGGGUGAAGUUGGAGAGAAAGGUGACGAGGGUCC

>P4861  
GAAAGCUGCGGACCUCGCGGAAAUUGCUGCGGCCAAUGGAU  
>P4862  
UCCACUGCUCAGACAGAUACAGGGCUAGCAUACAGUGUACC  
>P4863  
UCCCUUCGGCCGCCGCCGGCAUGAGCCACAUCCAGAUCCCG  
>P4864  
CCAGGACGGCCCGAGAACUGACAGACGGAGUGACAGACGGA  
>P4865  
UAAUAGUCCUCUAUGUCCCCAGGGUCGUCUUCUUCUUCUUC  
>P4866  
UCCUCAGUCUUAGGAGGCCGAGUUCGCCGACCUCGGCGCA  
>P4867  
AGAAGUCUUAAGAACUCAGGACAAGCAGCAGAAUACAUGC  
>P4868  
GUGGUCCUCAUUAAGGGUCCAGCUCGGACUUCUGAGUCUC  
>P4869  
CGCCUCCACUCCCGCAAGAACUCGCUGCCAGCGCGCCCA  
>P4870  
CCGCGUUUUGGUGCCUUGCCAGUGAAAGGCUCCGUAGCCC  
>P4871  
CUCAGCGCGGGCUGGCGGCUAGGCCCGAUACAGAGCCGC  
>P4872  
CUCCAGCACCUGCGACAUGUAGCUCACGGCCAGGAUCACGU  
>P4873  
CCAGGCCCAGGCCGGUAGGGAUCCUCUAGGGUCCAGCUCG  
>P4874  
CUGCGUACACAGACAUGGCCACAGCGCAGGCACCGCUCCU  
>P4875  
UAGCGGUUCUGCGCCCCAGAACCUCCAACAAGGUUCGGCGG  
>P4876  
AAGCCCUCUGGCGGGAAGGAAGGCCAUUCACCAGGCAACCC  
>P4877  
GGCCCCAAAGGAAAAAGCACAGAAGCGUGAGACGCCACCA  
>P4878  
AGGCCCGGAUCACGGCGGCAGCCCCGGCCCCGCCCAUCUC  
>P4879  
CCGCCGCACCGCUGGGGGCCACGUUGUCGGACCGAGGAGU  
>P4880  
CCGGCGCCAGGGCCACCGCCAUCCCGGGCCAGCCCAGCCC  
>P4881  
AUCCCGCUUUCUUGGAGGAACCACCGCAUCAGAUCUGCG  
>P4882  
AGAUGAUGAUGACACCGAUGAUUUAGAUGAGCUUGACACUG  
>P4883  
UCGGGGGGGGCAGCGGGCAGCCGCCUCGGACGGUGAGUG  
>P4884  
UGCCCCUGCCAGAGCCGGCCAGGUUGCAGCGCGGACACACU

>P4885  
GAGUCCUGUGGCAGAACUCAAAUGGAAGGAGGAGCAGCUG  
>P4886  
CCUAAGUCCAGGCCACAGUCAGGGAAGGGCGCUGAGAGGCG  
>P4887  
CCUGGCCUCCCGGGGAGCUGAGACUAGGGUCCCAGCACAGC  
>P4888  
GCGUUGCCGGGCCAGGGUCAAGCGGAGGGCUCCGACGGCGC  
>P4889  
UCACCUGCUACCCUCCCGCUACCCUCCCUUUCUCCUCCUU  
>P4890  
AGACCCUCGACCAAGCAGGAAGAAGAGGAGGAGGCGGCCCA  
>P4891  
AGGCACGCCUCAUAGUUUGCAAUCUCAGCCUCCACACACUU  
>P4892  
CCCCUGAGGAGCUGCAGGAGAUGAUCGAUGAGGUGGACGAG  
>P4893  
GCCGGGACCCGGGGGGCCGCACCCAGGGCAGGAGGGCGAGG  
>P4894  
CUUGGAACCCAUGGAAUCCAACUUCUUCUAUAAGAAUAAU  
>P4895  
AGCGCGGGUGGCAGGCUGCGAGGCGAGGGCGACCGAGACUU  
>P4896  
AAGGGCAAACAGUCAUUUGGAGCCACUCACCACUGUUUUA  
>P4897  
UCGGCGGGCGCUGACUGGGAUGGGCCAAGCGGCCAGUGAG  
>P4898  
AGCGGCCUGAAGCAACACGACCCCUAUAUCACCAGCAUCG  
>P4899  
AUUUAGAUCUUGUAGGGUGGAAAAUUGAAAGUGCCAUUUU  
>P4900  
UCCCGGGAUGGCCUUCAUGGAGAAGCCGCCAGCCGGCAAGG  
>P4901  
ACUGGGCAACUUCUUCUCCAAGCAGAAUACCUUCUCAUCU  
>P4902  
UGGAGAUGGUGCUGGAGAUGAUCGGAGAAUUAUCUGCUAG  
>P4903  
CAGCGGGCAUGCCGACCCAAGGACCGGGCGCCGGAGGGAC  
>P4904  
CCCUUGCGUCCGGUGCGGCGAUGCUGACCCCGGCGUUCGAC  
>P4905  
GAGCAAGGGAUAAGGGAGGAGGAGGAUCCGUCGUGCCGC  
>P4906  
CAAGCAAUACAAAUGCUGUAGCAAAACGGUUAUCCAUCU  
>P4907  
CGGGACCUGCGUCGCCGGGCAGGGGUCGCGUCGCGGUCCA  
>P4908  
AAGAACUUGCGCAGCGGGAGAGACCCAAACAUGUGCGUGU



>P4909  
GUGCGGCGGUCGCGAAGGGCAACCGAGGGGGCCGUGACCAC  
>P4910  
AAAUUUUAUCAAAGCCAUUUCAACAACCGCAUACCCAAUUA  
>P4911  
AUUACUCAAGUGUCUCCUGGAAACAGAGGGUCGUUGUCCCC  
>P4912  
CCUUCUUAAGGGUGGGGGAGAUUACAAAGUACAUUGAUCAG  
>P4913  
GAGGCCACGGUGGGGACCGAAGGGGACGGCUGCCCAGCCCC  
>P4914  
GGCGGCAGGCACAGCGCGCAAGACGGGGUGCGCGAUCCUC  
>P4915  
AAUGAAGAAGUCUGAGAAAAAGAGCAAGCAAGAGAAAGAGA  
>P4916  
AACCAGAGAGAGUCGGGUGAAGGUCCUGAGAAAACUGGCCG  
>P4917  
UGC GGUGCCGCCGGGCCUGGAGCCGUGGAACCGUGUGAGAA  
>P4918  
CGACUGCAAGGCAGGUUGAGAUGAUGGAUCUGAGGCUUGCA  
>P4919  
GAGACACUCCCGCCCCACCAGACUCAAGCCUCACUCGAC  
>P4920  
UUUACCAAGGCGAAUCCUGGAACACUCCACUACAGCUGCC  
>P4921  
CAUCUCCUGAUAAUUCAUGCAAAACAACAUUUGCUAAUCCU  
>P4922  
UAGCGCAGCGGGAUUCUCACACCUAGACCGUCGCGAGCGGG  
>P4923  
UGAGGACAAUUGAUGACAGAUAAGUACAUGAAUUAACACU  
>P4924  
GAGAAAUGUUGCUACAGCAGAGAAGAAGAAACAGAAGAAGAAG  
>P4925  
UUGGGGUCAGAGAUUCUCUCAUGAGCGAGGAGACCUUUGC  
>P4926  
GGGAUCCUUUCCGGAAGCGGAGCUCGGCGGGCGGGCCAAG  
>P4927  
CUGGGGAGCCCAGCGGCUCCAAGGGCGCCGGCUGGAGCUGC  
>P4928  
GGGCCAGGAGCGAGAGCGAGACUCUGGAGCGGUCGCCGCCG  
>P4929  
CAACAACCAGGUUCGCGCGAAAAGUGGUUCACGUGACCCA  
>P4930  
AGGAGGAGCUGCUCUCCUGUGAAUGGAUCCCAAGAAGAAGCC  
>P4931  
UCCGGGUCCCGCUUCAGCUCAGCUCAGCUCUGCUCGCGUGAGGCG  
>P4932  
GCUGAAUGCGCAGCACCCCGACUCACACCACCCGGGCCUGG

>P4933  
CCUACCCUGUAAGCCCCGCCAGCCUCCGGACGUGCUGUCCC  
>P4934  
CCAGGACCACCUCGGCCGUCACCUUAGCCAGGUGGCUGCUU  
>P4935  
AGGAAGAGGAGGAAGAGAUCACAUCUAUGCAGUCACCGAG  
>P4936  
CCGCGGCCCCUGUCCAAGAAACUCCACAGGCCCAGAAGACG  
>P4937  
GGGGAGGGGCGGAGCGCAGGAGUCGGAGGCGGGAGCAGACC  
>P4938  
CGUGUGAGAAGUUGGCCUUCAGGGGCUCAGGUUAAUAAUA  
>P4939  
AGCCCGGGAAGACUCGACUCACGACUUCGGGGCGCCUGCC  
>P4940  
CGGGAGGCUGGAGAGGCUCCAGCCUAGCUCCUCCCGCCGC  
>P4941  
ACCCUGAGGCCGUGUAAUCACCUCUUUUUGCUCCAAUUC  
>P4942  
CAAGCAAAGAAGCAUGAGGACACUGGAAGACUCCUCGGGG  
>P4943  
CGUCGGCGCCACGGCCGAGACACAUCUUCGCCGCCGAGCU  
>P4944  
GCGAGAAGACAAGCUGCCUUAUGAGGAUGUCGAAUACCAC  
>P4945  
CCGCCGCGGCGUCUUGCACUAGAUCGGGAAGCCGUGCCC  
>P4946  
ACCCCCGGCGACCACCCCGUACAACCCCCCACAUCGGGA  
>P4947  
GAUGGCCGGUUGGCAGAGCUACGUGGAUAACCUGAUGUGCG  
>P4948  
AGGAAUUGGGCGCACCGAGGAGGAGCCGGAGAAGCCACCAC  
>P4949  
CUCCUAUUUCUGUGAAGUGUAUAGUCUACAGGUUCAUAAGU  
>P4950  
UCCUGGCCCCCGGGCUGCCAUCCCGCCGGUUUUCAUCUG  
>P4951  
AUGAACGACGAGAAGAACAUAUUGUACAGUUACUGAAUUCU  
>P4952  
GAGCCUCGGUUACCUCCAUGACCCCUUGCUGGCCCCCUCC  
>P4953  
UGCAAGCGCCGCAGUCCUGAGUCGUUUCUUAGAUCAGGG  
>P4954  
CGUGCUCUGCGCUUGCCAUGAGACUCCUGGGAGCUGCAGCC  
>P4955  
CGACCAGCGAGGGUACCGGGAUGACCGCUCUCCGGCCCGGG  
>P4956  
GGUACUACACAACCGUCUCCAGCCUUGGUCUGAGUGGACUG

>P4957  
GACCAGCCCUGGAUUUGCUGAAAACCCGCAACAAAAUAGAC  
>P4958  
CAAUUCUUUAUCACCAAAAAGAGAAGAAUAUUGCAGUG  
>P4959  
GUAGAAGAUAAAACCCAGCAGAUGACCCUAAUAAUCAAGG  
>P4960  
GCAGCUGCUGGGCCUCCUCCACCUGCUGCACUGCCAGUCUC  
>P4961  
AAGGCCUUGGAGGAGGAAGAAUGGAGCAGGUCGGGCAAGC  
>P4962  
CGCCAACAUGGCGGAACGCAGGAGACACAAGAAGCGGAUC  
>P4963  
AACGGCAUUCAGACACGGACAGUGACAGGAGGGAAGAUGAU  
>P4964  
CCCGCGUUUCAGCCCUAGGGAGGUAAGGCGUGCAAGAGCC  
>P4965  
GCCGCUCCCCCUCCCGGAUGGAGGCACAAGGAAAUUCC  
>P4966  
AGGGGAGAGGCCUGGAGGACACCAACAUGGUGAGGCACUGC  
>P4967  
GGCGGCAGCACAGGAGGAGGAGGAGGAACAGCAGGAGGAGG  
>P4968  
GACGAGCAGGGGGCGGGCGGACAUCUUGGGAUCCGGAGAGU  
>P4969  
GCCGAGCCCCACGCAGCCGCACAGACGUAGUCCACAACCAU  
>P4970  
AGGUGCAGCCGGCGAAGACCAGAAGGAGGCCGAGAAGCGGG  
>P4971  
AGUUUUGGAGCAGACAAGAGACUGCAGAGAGGCUUGCUGAA  
>P4972  
UUGCGGCCCGUUUAGCCCUGAGCGGGAUCUGCGGCUGCCUG  
>P4973  
ACUCUCAGAGCACCUUCCGGAAGACCUCGCCCGCCCCUGGG  
>P4974  
CGGCCUCGACUUCUGGAGGAUGCUCGAGGCCCGGCCCCCC  
>P4975  
GAAGGAGCCCCAGGAGGGAGAGGGACCCGGCGAGGGGCUCA  
>P4976  
GUCAAUGCAAGGAAGAGGAGAAAAGAGGCGCCCGGACCCAA  
>P4977  
AGUGACGCGGCGCCGGCCAGAAUCCGACCGGACCGGGCUC  
>P4978  
GGGCUUCUCGGUCCGGGCGUAGCUCGCGAUGAAGGCCUAGC  
>P4979  
CCGCCGCUGGGCCUAGCGGUAGCAGCGGCUCUCCAGCGCG  
>P4980  
GCCCCUCUCCUGCGGGGAGAGCCGAGGGGGGGCGCUGCCG

>P4981  
CCCUCUGGGUCCCCCAAGAGGAGGAGAAAAAGCCCGUC  
>P4982  
GCUGCUGCAGUCGGCGCUCGACUUCUUGGCGGGUCCAGGCU  
>P4983  
GCAUGCACACGGCUGGAGAGAGGCUCUGCACCCGAGCACAG  
>P4984  
CAGAUGGACCCGUGGGCUGAGGAGAGGCCUGAGGAAAAGG  
>P4985  
CCGGCGUGGAGCAGACGCGGACCCCUCCUCCUGGCGGCGG  
>P4986  
GAAGCGCCGCGGGACGGCGAGAGCCGCGGCCGCGCGGA  
>P4987  
AGCCAGCCCCAACACGAGCGAGAGAAGGAAGUCGUCCUGCU  
>P4988  
CCUGUACCACGAGGCCGGACAGCGGCUGCGCCGCCUGCAGG  
>P4989  
GAGGUCACCACCGCAGCACGAGAAUCACCAUUCUUGUACA  
>P4990  
AGGAAGCCAGUGACCCUGAGAGCAACGAGGAAGAAGGUGAC  
>P4991  
GCGCACGCGCACGCUCAGCGAGAAGCGCGCCCCGUGGGCC  
>P4992  
AAUCUUCCUGUGUCCAGAAGAAAUCUCUCAGUUUGCCA  
>P4993  
CGCGCAACCUCACGCACUGAGCCGCAUGACUGCCACUGC  
>P4994  
GCACAGCCGCCCAGGAGGAAGCAGAGCCUGGCCAGGGCCA  
>P4995  
CGUCGCGGAGGAGGAGGAGGAGCCGGCGGCCCAAGCCAC  
>P4996  
UACAAGUUGAAGCAUGCCAAUUUCAUUCCUCUCCAGUA  
>P4997  
GCAAUGAGAAAGGAGAAAGAAGAAAGAAAAGAAGGAAAAG  
>P4998  
UGCUCCCAGCCUAGGAGGGGACUCCUGCGGAGAGGUGGGG  
>P4999  
AGGGUGUCUGUGGGGAUGUGACUAUCAGGGUGGGCCUGUGC  
>P5000  
AUGGCGGCGGCGGCGGCGUCAGGCGAGGCGCGCCGGGUGCU  
>P5001  
AGCCUUAUGGCGGCCGGAGGACGGGCCUCCCCGGCGCGGA  
>P5002  
GAACGGGCAGUUUAUAAGGAAGAAAGCUGGCUGCUGUAUGG  
>P5003  
CCGGUCUGCACAAGUGCAAAAUCCUUCCUGAAGUUUGUGU  
>P5004  
AACAGGUCGAAAACGCAACAUGGGGACGGCCCUGCAACGA

>P5005  
CAGGGAGAUGAAGCCGCCGAAAUGAGCGCGGUGCGCAGGU  
>P5006  
AGGCAGCGGUCUAGGCGAGGACGCCCGGCUGGACCAGGAGA  
>P5007  
GGCGGAGGAGGCGGGUACGAUCAGCUGCGGGCGGAGACAU  
>P5008  
GAAACCCCUAACCACCUAGGAAGGGACGAGAUAAAUA  
>P5009  
AGGGGCUGAAGAGCUUCCAGACCGAGAGCGGGACAAGCCAU  
>P5010  
GCUGAAAGAAGAGUGGGAAAAGGCCAAAAGGAGGUGGAAG  
>P5011  
ACUGGAAGGAGAGCAAGCACAAAGUCAUCAUGGCUUCAGCG  
>P5012  
CCUCGCUCSCCGUGACUGCACCGCCGGCCCGCUCAGCUU  
>P5013  
UGGCACCGCGGGGAGAGGGAGGGAGCGAGCGAGCGG  
>P5014  
GGUUAUGAGCGUCACAGAGCAAGUCGAGAAAAAGAAGACG  
>P5015  
UUACCAUCAGCAAUAACAACAACACACAAUGUCAACAUCGCC  
>P5016  
CCUCCAGCCGAUUGCCCUCAGGCCUCGAGUCCCCACUAG  
>P5017  
UGGGGAGCAGAAAGUGAGCAGACAGUUCAAGCAAUGUCAC  
>P5018  
AGGAGAGUGCUGGUAUUGUGACUAGUGAUGGGAGUUCGGUG  
>P5019  
UCCACGUGCUUUCGGCGGCGACAUGGAGCUGGAGGAGUUGG  
>P5020  
CGCGCCGGGAAGCGAGGCAGAACUCUAGAAAAGAGGGGUGG  
>P5021  
GCUAAGGGCUGGAAUGAAGUACAGAGUGGAGACGAGGAGGA  
>P5022  
CGCACCCGUGGCCGCCUCCCAGCCUCUUGCCGGACGAGC  
>P5023  
UUAUACUUGCCGCUUGUGUCAUGAUAACAAUGAAGAUCAUC  
>P5024  
AGGUGGAGGAGAUGGCGGCGACGGCCCGGGAAGAUGGCGCC  
>P5025  
GAGGAAGGGGGCGGCGAGCAUAAGAACCCGCCGCACCCGG  
>P5026  
GCUCCUUCUUCUUGUCUCCACUUCUUCUUUCUUCUUGG  
>P5027  
AGCGAAUAGUUCCAUGAUGACCCCGGCCUGAGGCCGCCG  
>P5028  
UGGAGUCGAGAGGCCGGAGGAGGGCAGGAGGAAGGGGUGC

>P5029  
GGUCUAAUUCAAAUAUCUCAAGGGAAGCAUUCGUACUAAAU  
>P5030  
ACCUGGCGAGGACCUUCGGCAGCCGGAUCCUGCGUUAGUGC  
>P5031  
ACAGAAGAGGAGAAAACGGAAUCUAAUCAGGAGGUUGC UAA  
>P5032  
CCUCUAUCUCCUCUAUGGAGAGAGGCUUUCAGCCUCCCAA  
>P5033  
UUGGGGGAAGGGGGAUGGGGAGGAGAAGCGCACACACGAGC  
>P5034  
ACGAGGAGGACACGGAACGCUGAACUGCCUGGUGACGAAG  
>P5035  
UCCUUAACCAAUCGGCUGCCAUCCGAGGAGCUGAGGAAGCC  
>P5036  
UCGAGCACUAAGAACGGGACACGGUACAAAGUCUCCAUGUU  
>P5037  
CAUGAUUGAAGAUUAAAGCAAUUCCUCUCCUCCUGUGGUCC  
>P5038  
AGCCAUAGCUCAGGGUCAUCAGAAAAUAAUAGACAAAAG  
>P5039  
GCAGCUCCCCGGCUGAGCACAUCCCGCAGCCAACUCCUACC  
>P5040  
AAAUGUCCGAAGGCCGCAGUACUUGACCCUGUAUUUUGGGA  
>P5041  
AUACGGCACUCUCUUUAUUGACUACUGCUUCUCUCGGCACC  
>P5042  
CUUGGAGCAGCUGCGCCAGUACGACGGCUCCCGCAACCCGC  
>P5043  
CAUGGAGACAGUGAACAGGGAGAUAGUGAUCAUGAUGCCAC  
>P5044  
GGUGGUGGCGGCGGAUCGAGAUUUCAAGGCUGAAGCAGCU  
>P5045  
UGUAAUACCCUCUCUUUGUUUUCGAGCAGCUGAUCCGCUGA  
>P5046  
GCUGC GGGCUUCUCGCGGACACUUGGACCGCCCGUAGGGGC  
>P5047  
ACGGGGAGGCCUAGGCCUGGAUGCUACGUCGCAAUAAACUG  
>P5048  
GGAAGCCAUGGUACAGGCAGAGCUCAGGGCGAUCCCCAGGU  
>P5049  
CCACCUCGGCAGGGAAGAAACUCUAAUCACUAACGCAGUA  
>P5050  
CCGCACUCUAGACCCAGGUAUCUCACCAACCGCAGGAGCA  
>P5051  
GAGAUGACUGCCGGCCACCGACACCGAGGACUCGCCAGGUG  
>P5052  
GUUCACGCCGAGCCCCGUGAGGGAAGCGUCUCCGUUGGGU

>P5053  
UGGGCCUGCAGGCCGCGAACACAGCUGCACCGGGAGACAGG  
>P5054  
UGACACGGAGGGAGAGGCUGACGACUUUGAUCCUGGGAAGA  
>P5055  
CCACGACUCCAGUUACUAUGAUGACAGGUCAGACCAUGAGC  
>P5056  
AGCAGGUGUGCACCACGUAGACCACGAACACGCCACCACC  
>P5057  
GCGGCGGCCCGGCGGCAUCAGCAGAGACAGGACGGGGCCG  
>P5058  
UGCACUUGUCAAUUCCUGUAAGCCAGUAACAAUAAAAUUC  
>P5059  
GUUUGACCACCUAGAGGAGCACCUUGGAGAAGUUCGUGGAGA  
>P5060  
ACCCCAGUUGC UUUUCUGCAACUGUUGACUUCAAAACUU  
>P5061  
GGGAGGGGAGAGGAGGAGGGAGCCGGGCCCGGGCAGGUGCG  
>P5062  
GGCUUCCCUGCAGAAGCUGCAGGAGCGGCGGGACCAGGAGC  
>P5063  
CAGAAGGAGGAGUACUGGCGAGACGAGAAGAAGAGGAGCG  
>P5064  
UGACCUUGC GCCGAGGGACCAGGAAGGUCAGGUGCUCGCCC  
>P5065  
GUGAGAGAGUUAGAGGAAAAACUGGUAGAGAGGGAGAAAGG  
>P5066  
CCUCCUUCAGCUCUGUGGUGACGGUGGCCGAGGUGGAGGGC  
>P5067  
UGCAUUAAAUGUCUUGUUCUAAAUUUAUUCUCUGGAAGA  
>P5068  
UACAGCAGCAGAGACAGAAGAUGAUGAAAGUGAUGGGGAGG  
>P5069  
GACGCUCAAACGCGCGCUCCACCCGCAGCCUCCUCCUGCC  
>P5070  
GGCAUCCUCAGCGGCUGGAAGACCUUCUGGCAGUCAGUGA  
>P5071  
GCACCUGGGGCCCGAUCGAAACCGUCCGACAUGCUCUCCU  
>P5072  
CGGAAAGGGCAGCUACAGCCACUGCCCUUCUCCGCCACAAC  
>P5073  
AACAAAGAAACACAAGGCUCCAGCGGCCGCGGUGGUCGGGC  
>P5074  
GACUCGACCACUGCGGCGGGACCAAAAAAGACAAGGAAAA  
>P5075  
GAAGGUUUUCGGUACUUUGAUAAUCCCUUUUGCCGCUUU  
>P5076  
GAAGGAGCACGUGGGCACGGACCAAUUCGGGAACAAUACU

>P5077  
UUUCUCCUGGUGUCCAGCAGAACGGCGGGCGCAAGGUG  
>P5078  
CUGGACUUAAGGAAGAGUGUACUCGUAGGCGGACAGCUUUA  
>P5079  
GACCGGGACAAGGAACGGGAAGAGACCGGGAAAAAGACAA  
>P5080  
AACGUUCAACGUCUAUGAGAAGAGUUCUAAUGAUAGAGAU  
>P5081  
GCGCGUCACUCCCCAUGGCAGAGACCCCGUCGGGCUCCUG  
>P5082  
AGCUCAGCGGGGAGAAGCAGAACACCGGAGGCCCGACCAGC  
>P5083  
UGGCUCAUGAGCAAGGUGGCAGAUCAUCAAGUGAGUCAGA  
>P5084  
AACCUCCGUCCCCGCCACGAAAACGCUCCCAGCCGCCUAG  
>P5085  
UGGCUAGCUAGGCGGCUGGGAGCGUUUUCGUGGCGGGGAAC  
>P5086  
UCCUCCUCCCCUAUGAGCCCAGGCAGGGCAAUUAACCUC  
>P5087  
UGAAAGAGAAAUAUCGCCACAGGAAAUGGCCAGAGGAGG  
>P5088  
AGGAGAGAGAGAGAGAAAGAUGAGAAAAGAAAGGAAUGCA  
>P5089  
GCCUCUGGCCUCGCCGAGGAACAGACAUCGACGUGGUGGG  
>P5090  
UCCGGCCGGUCCCAGGCCGCACAGCUCGCGGCUGCCAGGGC  
>P5091  
GCGCCUCUUAGCCGCGUCGCAGCUGCAGUGUCAGCAAGUGC  
>P5092  
GGCGGCGGGUCGGGAGUCCGAGAUGGUAGAUCCCCUCAG  
>P5093  
CCUCCUUCUCGCGGCGCUCGAGGGACCAUGGCCGAUCCUCG  
>P5094  
UUUUUACCGACCUCAGAGCUAACUCAUUAUCUCUUCGCAC  
>P5095  
CACUCCGCGAGCGGUGGCCAUUGUACGCAGCUGAUGGCGA  
>P5096  
AGGAGAAGAAGAAGGGGAAAACAACUAGUAGAAUAUGUAAG  
>P5097  
CCCCCCGCGCCAUCUUAACUCCCCGGGGUGCCGCCGCC  
>P5098  
UCAUGUAACGCAACUUGGCCACAUUCACUUUCCCCAUGGCG  
>P5099  
UUCACCAGUUCGUUUGUAAUUGCAAUCUGUUUAAGAUGAA  
>P5100  
CCAGGUCCGACCCGGUGCUGAGGACCUUGCAGGGAAGGCG



>P5101  
UGUCUACUGUAUUUAAACAUUUUUUGCAGGUUGGUCUCCCU  
>P5102  
CCAAAGUCUUCAACAAGGAGAGGGAAGUAAAAAGGGAAAG  
>P5103  
CACAGAAGAAUUCAGAAUAAGAAGGAAAAGGAAGAGGCG  
>P5104  
AGGAACAGCCCCGAGCGGCGAGACGGUCCCCGCAUGUCUG  
>P5105  
CGGCGGGUAAACAUGGCCGCACUGACGACGGUUGUGGUAGC  
>P5106  
ACUGGGGCUGAUUGAUGAGGAGAGUGGACAUGAAGGCGGCA  
>P5107  
GCAAAAUUGAUGAGGAGAGAAAAGCACUUGAAACAAAGCU  
>P5108  
UUUCUGAUGCCAGCUCCAUGAGAAGUUUGAGCACCUGAAGC  
>P5109  
CCGCCCCACACGGGCCUACACGCACACGCCGCCCGCGGUU  
>P5110  
CCGCCGCCGCCGCCGAGACUGACAAACAACCCUGCAAU  
>P5111  
CCAUUGCUCUCGCUCUCUGAGUAGGAGCGGAACUGCUCCG  
>P5112  
ACUCCUAGCGGCACCGGCUUAGGUCCUGCGGGCCGACCGUC  
>P5113  
CUCCGACGCAGCUCCGCCGACGCUGGGAAGCCGACAGACC  
>P5114  
GUGGGGAAAGUUCUAAAGAGAGAAAAAAGACAAAGAUGAC  
>P5115  
GCUAAGGAGCGGCUCGGACGAGGGAGAGGAGACCGAG  
>P5116  
AGCGAAGAGGCGGGCGGGCCAGCGAGGAGCGCGGAGAGAAA  
>P5117  
UUAUUGAAGUACCUGUUGCUUAUUCUAAGAAUUAUAAAUG  
>P5118  
AGAGGAGCCUAAGGAAGAGGAUCAAGGAGAAGGCUACUUGU  
>P5119  
GCCCCACAGAGCCAUGGUCCAUCCGAGAGAAGCUAUGUUUA  
>P5120  
GCUCACAAGUGAGGUCUGGAAGAACAACAGGGAAGACAUCC  
>P5121  
ACCAGAUUUCACGAGUGGCAAAAUGUUAGCGGAUGAGUUU  
>P5122  
UGAGCUUCUUGAUCUCCAGAUCCACGUUCCUGUCGGCA  
>P5123  
GCUGGCACUUAUCAUGGCCGUAUAAAUGGAGGAGUACGAGGC  
>P5124  
GCUUCGGGCCUCUGGAAUUAGCGCUCGCCAGCUAGCCGC

>P5125  
GACUCCACACACUCAGCCAAAGGCAGCACACACAUCACACG  
>P5126  
UGUGGGCGGAGAGGCCACAGACAUCCCCUCCUCAGACGCG  
>P5127  
UUCACCUUCUGUUGAGUGUCAUAACUUUGGCUUGAAGCUC  
>P5128  
GCAAGACAAGACACUCAAGAAGAGCGAGCUGCGCCUGGGUC  
>P5129  
GAACAGAAAAGGAAACAGGAAGAAGAUGAAGAAAACAAACC  
>P5130  
GUUAUCGUUCUUUCGCUGUCACCAACAAUCGAGUCUCCAAC  
>P5131  
UUCUAGAUCAAAACUCACCAUGAAGACUUCAGGAAACUUC  
>P5132  
GGGACAAAGAUGAAUAUGAGAACUCGCCGAGAAGAGGCUC  
>P5133  
GGCAAGAUUUCGCGCUGCCC AUCCCGGGCCCUUCAUCAGU  
>P5134  
GAGCAAAACUAGCCAAGGAGAGGCAGAGAAGGAGCGGCUA  
>P5135  
CGACGGCAUGGCCUGGCUACAGCAGGUGCAGCCCGGGGCCU  
>P5136  
CCAGCCGACUGUGCAAUCCACGACAAUGACCCUGGCGACC  
>P5137  
CCAAGGAGGAGGAAGAGGAAACAAGACAAACAGCCAGUGC  
>P5138  
GAAGUGAGGAGAAGGUGGAGAGAGAGAAGAGGAAGAGGAA  
>P5139  
CUUCCAAGGGGAAAGCAAAGAGAGACAAAGCAAGUGGUGAU  
>P5140  
UUGGGGGUUC CAGAUCUAACAUCACCCCGGUAAGUCCCAA  
>P5141  
CCGGUGUGGUGCUCGCGGACAGGAAGCAGGAGAGUUUGCCA  
>P5142  
AAGGAAGAGCUGAAGAAGCAAGUGGAGAAGCUGCAGGCCCA  
>P5143  
CCCGAUGCAGUCCCUGAUGCAGGCUCCCCUCCUGAUCGCC  
>P5144  
GACGGCAGCCCCUGGCCCGGAGCUCUUUCCUCUACCCCG  
>P5145  
GUUGAUGUUGCAGGUGCGUU AUGGAUACAUAACCUGAGGAG  
>P5146  
GGUACCUGAGAUUGGGGGCGACCAUGGCAAAAAGCAAGUUC  
>P5147  
UAUGAAUUAUUCAGAGAUCGAGUCUAAGGUUCGAGAGGCAA  
>P5148  
GGCGGUGACCCCGGCCUGGAACUGCCCCGGUACGGAAGUGU

>P5149  
UAAGAAGGUGGAGACCGGAGAGCUGUGAGGUUGUGAGUAA  
>P5150  
GGUCAGGAUGUCCACGAAGAACCGGCGGCUCUUCAGGAGUG  
>P5151  
GAAGAAGAAAAAGAAAAAGAAGAAGCAUCGAAAGAGCAGUU  
>P5152  
AAAGAAUGAGUUUGGAAGAACCAAAGAAGAUGACCAGAGA  
>P5153  
ACGCUCGUCCUCACGCAACCACUGUGGCAGCUCCUUCUCCC  
>P5154  
AGUUAGCGUCCUCA AUGUGGACGCCUGAGCUCCCAUAGG  
>P5155  
AGCCGCUGUCGUCCGAGAUCACGAUGAAAUCCUCCAUGGCU  
>P5156  
UGACCAGGAGAAAGAAAGAAAGAAACGGGAGGAGCGGGAGC  
>P5157  
GCGCCGCCUCCCGCUCCCUGAGGGCCUGGGCCGAGAGAGAC  
>P5158  
CCCACUGAGUCACAGGUUUGAGAUUCCAGAGAGGCCAAAG  
>P5159  
GGACCCUGUGCUGGGCGCGGAGUCACGCAGGCUCGAGGUGA  
>P5160  
UGAGUCUGAGCGCUCAGAGGAGAGGCCUGAGGAGUCCAGAC  
>P5161  
AAAAGAAGAAAGAGAGGUGUAGUGGGGCCAGGGCCGGGGCC  
>P5162  
UUGCACCCAGCGUCUCCUCACAAGACGGCCCGGCCUUU  
>P5163  
CUGGCUGUCACACUUGGGGGACUGAGAGCCUUUUUGCUUCC  
>P5164  
UCUCGGGGCUCUGGGACUGGACGACUGCAGCCUCUCCCUC  
>P5165  
CAACCAGGCACUGGAGCAGGAACUGCGGGCACUGCGGGAGC  
>P5166  
GAGAACAGAAGAGAAUCCAGAGUGUUCAGACAGAACUAGG  
>P5167  
GGAACCGCCGGCCGGAUGCAGCCUCGCGACCCGGCUCCGC  
>P5168  
GGUCGCCCAGACGUCGGAGGAGCCGGGUCACGAGGCUGGAG  
>P5169  
GGACCGACCCGGGGGAUGGAGGGGGCACGCUUCUACAACC  
>P5170  
CCGGCUCACGAAAGAGCUCUAGGCAGAUGGAGCACGUCGCC  
>P5171  
CCUUGGCUUUCAUCUUCUGCACUGCCUCCAGGUGCUUCCUC  
>P5172  
GCGGGACCAUUUCCCGCAUAGGCUCGGUGCCCCUGCCCCG

>P5173  
AAGUACGACCCAACCCACGAACUCCAGCCUGUGCGGAAAC  
>P5174  
CUCCCUCUCCUGUGGGAGAAGAGGAGGAGGGGAAGUGACUGC  
>P5175  
AUGAGUUCACCAAACAUGUCACCAGUGAAUGUUUGGGGUGG  
>P5176  
AGCAAUUCAGAAUGACCUGAUCAGUGGAAGACUCAUAU  
>P5177  
ACGUCCGGCAGCCGCUCUCCACGAACUCGUUCAGCUCCUCC  
>P5178  
ACAGUCCAGGAAACCAACAAAUAACUCUGAAAGCAUUGA  
>P5179  
GGUGUACAGCGAACCCAAAGAGGACCUGCUCGUAGCAACCA  
>P5180  
GAGGGACGAGUCCUGCGGGAAGGAGGGAGGCGGGGGUAC  
>P5181  
CGGCCGAGAGAGGUCUGCUGAACGGACACGUGAAGAAGGAA  
>P5182  
GGCUGAAGACUUUAAGUGACAAGUCAAGAGAAGCAAAAGUG  
>P5183  
GUACAAGAACUUCACUUGACAUUGAAGAGUACUCGGAUACU  
>P5184  
AGUCUGUGCAGCUUCCGGAGAGUGGCGGGUUGAUUUUCUCA  
>P5185  
CUGCGGCAUCGCAGCUUGCGACCGAGGCAAACUCCACACAC  
>P5186  
AAGUGGCAGCAACAGAGGGGACUAGCAGCGAAUAUGUAAGU  
>P5187  
ACAGGGUUCACCAGGAUGUAAGAGGAGAGAGGAAUCCACAG  
>P5188  
CGUCACGGGCCUCAGCUGGGAUUCGCGCCCCUCGGACGG  
>P5189  
CUCCGCGCAAGCAGCUGGCCACCAAGGCGGCUCGGAAGAGC  
>P5190  
UAGGCUCAUCUCCAUGGCCCAGACUUUGCUUUCUCCUCGCAGU  
>P5191  
AGAAGCAGCAGGGGAAUCAAGGGCAAGAAGGGACCCAGAG  
>P5192  
AUUAGGAACUCAAGGAUUAGAGUUUUGGAGAGGCGGGAGAG  
>P5193  
CAAGCAAUGACCUUGUAAACAGAGAGAGGGGCUCAGACAUG  
>P5194  
UGCCACUGCCCUUCUUGUCCACCCACAGCUCUGACUUCUCC  
>P5195  
GCAGCCGCUCCUCGUCGCGCAGCCGGGCCUCGCCCCGCAGG  
>P5196  
GGAUGAUGAAGCUCAAGUCGACCAGACCCGCACCUACGAC

>P5197  
GGGCCUCUCUCCCACUCCCCACACACCGAUUUCUGAGUAGC  
>P5198  
CCGACAAACAAGAUUAAAUGAGCUUGGAUUGAACCUUGUAG  
>P5199  
GAGGGGACCGCCUCUUCUCCACAACUGAGGAGGCCACAGCU  
>P5200  
UGUCUGAGGGCGAUCGUGGGACUCUGCUGCUCCAGGCCGGG  
>P5201  
GGUGCCAAGAACAUGAAGAAGCCCCACAGCCACUGUUGC  
>P5202  
GGCUGAAGGGUUAGCGGAGCACGGGCAAGGCGGAGAGUGAC  
>P5203  
GUAGGGGCGAAGGUGCAGGGAGAUCGCGGCGGGCGCAGUCU  
>P5204  
ACACUGUCGCCGCCGUGCCAGAGCCGCCGCCUCCUCCCUC  
>P5205  
UUGUUUCAGAUCGAUGGGCUAGAGGAGAAGCUGUCCCAGUG  
>P5206  
GAGCGGAGCCGGAGCGAGCCAGCAGCCACAAAGUGCCAU  
>P5207  
AGCCAGGCCAGGGGGCCGUAGAGGGGUGACAGGGGCUGCG  
>P5208  
GAUUUUGCAGCAAGCACGGCAGCAACAGGAGGAACUCGAGG  
>P5209  
CUUCGCAACACAGCAGCUCCAUACUCGGGCAGCGAACAGGC  
>P5210  
GGUAGAGAAGGAGAACAGCCACUUUUUCGUCGCCACCUUUG  
>P5211  
GAAGGCUUAUCAAGCCCUCAAGCCACCCAGGCAAAGCAGG  
>P5212  
CGGGCUCAGGCAUUGAAUCCAUUGGCCCGGCCGGCCCGGAC  
>P5213  
CGUCCACAGCUCAUAGGGGAUGUCCAUCACCACCUUGACC  
>P5214  
CCCUGAUUUUGAAGCUGAGGAGUCAGGGGCAUGGCUCUGGC  
>P5215  
UCAGCCACCGUCAUCCAACAAGCGUCCAGCAAUAGCACGC  
>P5216  
CGCAACGGGUUCUAGGCUGCAGGCAGCUCGAGGACCCGCGG  
>P5217  
CCGCGGGGCCCGGGACCGCGAGGAGGACGGCGGGGGCCUGG  
>P5218  
UUAUCCCUAGAUGAUGAACAUGGCCUCCUCCAACAGCCCU  
>P5219  
CUUGAGGGCUCGCGUGAACC CGCGUAGCCCCGCGC  
>P5220  
ACAAGGUCCCAUGCUGGUCACCUCUGAGGAUGAUGCCGUC

>P5221  
CCUCUCGUUUUCCUGCAGGAUCUAUCUUGGGAUCCAUGG  
>P5222  
GCAGAGGCAAAGGCGGCGACAGCUCCUCACCCCUGGCCUCC  
>P5223  
CCC GCGAAGAUGGCUGCCGUACGCCGGGCCCGCAGUUAUUG  
>P5224  
CUUAAUAGGUUUUCAAAUGGACA UUUUGAUGCAUCACUUA  
>P5225  
GCCAGGGGCCGCCGCCGGGGAGCCGGAGCGGGCAGGACCCU  
>P5226  
UUCAUUUUCAUCCGUUGUUGACUCAGAUGCCUCAGGGCCAG  
>P5227  
GCGACGGCGGCGGCAGGGACAGCAGGAGCAGUGGUGCUGUC  
>P5228  
CGAGCCACACGGGCUCGAGGAUGGGCCGACAGGGGCUCGGG  
>P5229  
AAAAAGCAGGGAGGAAGGGCACAAAGAUAAAGAGAGGGCAC  
>P5230  
GCGAACUCCCCGGCAGCGGACUGUAGCCCAGGCAGACGCC  
>P5231  
GAGCGGGAGCAGGAGCGCGGAGCGGAGCGUCCGACCCGCC  
>P5232  
GUUGACCCGGGCCCCUCGGAACCUCCAGCUUGGUCCGGUCU  
>P5233  
GCCGGUUAUUCACAGAGAGGAGGUCCUGGAUCAGCAAGAGG  
>P5234  
GGGCAGGGGCUGAGGGAGUGAGUGAAGCGGACGCGCGAGGG  
>P5235  
GGAGCUGCAGCGCCUGGGCGAGCGGCUC CAGGAGCUGGAGC  
>P5236  
AGCCCAAGAGAAGGCUGAGCAGGAAAGCGGCCUGUAUAGAU  
>P5237  
UGGUUCCAGGGGCAGCCGACCUCCACUCGGGGGACUACC  
>P5238  
AAGCGUUAGUACAAGUAAAAAGGAUAAAAAAGAUGAGCGAA  
>P5239  
CGCUCGGUUCUCUAGGUUGAAAUUCCUGAUACCGCGAAUCA  
>P5240  
UAGUGGGAACAGUCAUAAGCAUAAAGGUGAGGCCUAAAGAAC  
>P5241  
GUUGGAGAGGUGUUACCGGACGGCGGCGACAAGGGUGUUC  
>P5242  
GGCCCGUCCAGCAGGCGGAGACGCGGGCUUGCCCCGGCUAG  
>P5243  
CCCAGCCGCGCCUCGCGGCCAGCCGGCUAGCUCAGGUCCG  
>P5244  
ACAAGCAGACACCGCUCGCGAUCCAACGCCAGAGAAUCGAA

>P5245  
GGGCGGAGAGGGCGAAGUGACAGGGGGCGCGGGCAGGGGGCC  
>P5246  
UCACCGCCGCCACGACCACGCUCUGCACUCCCGCUCCC  
>P5247  
GGUGGAGAGGGCUGUACUAGAGGAGGUGCAAUUGGAGGAGG  
>P5248  
GGUUCAGGGUCCGAAUCGGACUCGGACAGUGAGAGCAGUC  
>P5249  
ACUGCCUCCCUUCACUGGCGACCCGGCAGCGGCAGCAGCAG  
>P5250  
GAAAAAGGGUGGAAAAGUCGAGCACAAAAAAGGAGCCCAA  
>P5251  
CGCCCGCUGCCGAAGGCGGCAGGACGAGGCCCGCGGGGGC  
>P5252  
GGUGGAGAGAAGGCCCUAGAUAUCUGUGGCGCCAGAGAUC  
>P5253  
CGUUCGGUUCGGCACCUGGAACUGGAUCUGGCGGCUGCU  
>P5254  
AGUGCUCCCGUGUAAAUAAAAGAGGAAAAAAGUUUCUCAA  
>P5255  
AGGGGCGGGUGCAAUGGCGGAGGAACAGGUGAACCGCAGCG  
>P5256  
AUACCUGUUAAGGGUACACGACAGCGCCAUUGCAGCUGCCC  
>P5257  
CCUCUCUGUCUGGAAGGACAAAUUGC UACAUCAAACAGGA  
>P5258  
ACCACCGAGUGACCGAGGGCACCAUCAGGGAGGAACAGGAG  
>P5259  
AGAUA AAAAAGAGCCUACCCAGCUGUUGUUGAAGAACAGG  
>P5260  
GCGGCUGGGCGCGCUCUCUAUUUUCUUUUCUUCUCCUUUC  
>P5261  
GAUGCCUCAGCGAGGAAUAAGAGGUCAACCCGGUGCCAG  
>P5262  
UCGGGGCAGGGACCGGGCGGAGGCGACGCUCCAUGGACGCC  
>P5263  
CUGGUUGCAGUCUAGCGACCACGGCCAGACGUCCUCGCUGU  
>P5264  
GGCUGCGGCGGUGGCUUCUGAGGCUGUCGGGUCUUUGCGGG  
>P5265  
CCACUCCUUCUUGGCCUCACCCUCCCAGUGCACUGAAG  
>P5266  
CCAUGACGGCGACCCGGGGAAGCGCCCCGCGGCCAAGGCC  
>P5267  
GACUGACCGCUACACCAUCCAUAGCCAGCUGGAGCACCUGC  
>P5268  
GGCGCAGCGAUGGAGAAGGAACCUGUUGCGCGACUCCCGG

>P5269  
AGCAGCUGGGCACGGCGUCCAGGGCAGCUAGGGCCUGGGCC  
>P5270  
CAAUUCUAGGCCUUAGUGGAAAUAGUACUCAUCUCUUCUGU  
>P5271  
UGGAUCGCAGGGGACAGCAGAGCGAAGCCCAGCCCGUGGA  
>P5272  
CCAGCUCGCGCCCGCCCGCCCCAGCCCCGGGCCUCCGCGCC  
>P5273  
UGAUUCUGAGCCGCGCAGGCAGAGGCAAGGGCGAGGGCGGC  
>P5274  
CUCCCCACGGGCGCCGCGCAGCUGGAGGAGGCCAAGUGCC  
>P5275  
CUGUGUUGAUAAAGCGUUACCACCAAUUGCGCUUUCUAUAGC  
>P5276  
CGAAAACACGACUAUCCAGCAGCAGCGAAGACGCUGUCCCA  
>P5277  
GCGUCAGGGGCAGGCAACAGAGUGGGCGGCCGUACGGCCCU  
>P5278  
CGUCAUCACUGCGGGAUCCAAGACACAUUUAAGGGACAAGU  
>P5279  
CGGGGAGCUGGCGCUCAUCUACGGCACCCCCAGGGCUGCGA  
>P5280  
GAGGGCUGCCGCGCGCUGGCAGUGCACCUGCUGGAUCUGGG  
>P5281  
CGAGCAGGAGAGCGCCCGGAACGGCGGCCGCAACCGCGGCG  
>P5282  
GACUCCUGGUUCAGGAGACAGACAGCGGACGGAUCCAGG  
>P5283  
AGAGAUUAAAGGUGAUUACGAUUGUGGCUGAGGGCGCCACGC  
>P5284  
GGAGCUGAAGCAGCUGCGGGAGGAGAGCGCGCACCUGCGGU  
>P5285  
AGGCCGGGGCGGAGGAGAAGAUGCAGGAGCAGCUGGAGCGC  
>P5286  
CUCAGCCUCUGGACAUGAGGACCCUGAGACCCUGCUCUUGA  
>P5287  
GGCUGGGACCUGCUGCACGAUGGCCUGGGGCUCGAUGGCC  
>P5288  
GAGAACAUCACGCCCGCCACCAGACGCGCACGAACCUCG  
>P5289  
GUGAGGAGCCCUGGCCUCAGAGGGCAAGGCAGGAGCUCGGG  
>P5290  
GGCCGGCGAUGCAGGGGGGCACUCCGGGGUCCGCAAGCGC  
>P5291  
GCUCGGGAGUGGCCUCAAGAUGGAUGAAGACGGCGGGCGGC  
>P5292  
GCGGGCUCGGGGCGCGGGCAGGGCGCGGGCUUGCGGGC



>P5293  
AGGGCUCUGGUCGGCGGCCUACGGCGUGGGGGACGUGCCUG  
>P5294  
CUCAUCCUCUGCGACGGGGGAUGAGGGGUCUGAGAGGAACU  
>P5295  
AGAUGAGGGAAGCGGGAGUGAUGAAGACGAGAAUGAUGAAG  
>P5296  
CUGCCGCUGCUGCUGCACGAUCGCCGCAGCCCCAGCCUU  
>P5297  
GGAAACUUGAACUCUACUGAGUUGGUCUGCCCAUGUAGAU  
>P5298  
CGAGGGCCGAUGGCCUAAUUAACCCGCUGACUGGACCGUGG  
>P5299  
UCUGCAAACUCGUGGCUCGUAGUUGAGAACUGGAAAUGCGU  
>P5300  
CGGCGUGUCCUUGGACUUAGAGAGUGGGGACGUCCGGCUUC  
>P5301  
GAGGGCCGGAGACGCUGCAGACCCGCGACCCGGAGCAGCUC  
>P5302  
AAAAGAAGGGAGGCUGGAGAAUCUGGACCCGAGACGUAGU  
>P5303  
GCAGGUAUUGGAGAAGAAGGAGGCGGGCGGCGAUGCCUGUCA  
>P5304  
AGGCGCUGCGGCCGGCCAGAGAGGCCCCGCACGUCCAGG  
>P5305  
UCCGCUUUUCCGCAGCCCAACAGGCUCGACCAAUCUGAG  
>P5306  
GAGGGAGGGUGCGAGGGGAAACCGGAAGGAAGAGGCGGCGG  
>P5307  
CGCGCCCCGGCCAGGACGACAUCGCGGCACCUGCGGCGCGG  
>P5308  
AGGAGACACACUGAGCUGAGACUCACUUUUCUCUCCUGAA  
>P5309  
GGUGGCCUCUGCCGCUUUUGAGAUCGGACGCGCGAGUCCC  
>P5310  
CAAAGGGGACGUGUUUGACGAGAAGCAGACGAGUCGCUCC  
>P5311  
CCGGGAGCGGUCGAAGGAGGAGUCUGACGGGUGGCGGGGGA  
>P5312  
UCCCGUUUCCGGCGGGGGAGAUGGCCAGGAUCUGACCCGGG  
>P5313  
GGAGGAGCCCUUGGAGGAGGAGCAACGACCCAGAGCCGGG  
>P5314  
GGUCUUCUUUGUUGAUGGUGAAUAAACAGGCAUUGGGUACC  
>P5315  
UUACCUAUGAAGGCAACAGCAUGACAUCGCGUGGCUGGC  
>P5316  
GUGCCAACUACAGCUUUCACAAGGAGAGUGGCCGCUUCCAG

>P5317  
CUCCGGCUCAGCUCCACCCGAAUGAGGCGCCGACACCCAC  
>P5318  
GGCGCGGGCCGGGGCCGCCACGGCGAGGGCCGGCCAGG  
>P5319  
GGGACCACCCCAUCUCCUACCAGUCUGACAUUCCAGCA  
>P5320  
CGUUUCUGCCUGCAGCCUGGAAUUGUCUCGCCAUUUAACG  
>P5321  
ACACCUAAAAUGCCAGGGACACGUAGCACUGGAGCUUGCUG  
>P5322  
CAGCAGGGGCAGCAGCGGUAACCCAUGCCGGGCAUCAGGA  
>P5323  
GGACAACGGAGACCAGACCUACUGCAGCCACGCGGGCGAGC  
>P5324  
CCAGGAGUCGCCGCGGAGCCAGCGUCGCCUCCAGCUGUUG  
>P5325  
GUCUGAACGCCGAGGAAUUC AUGUGGAUCAUUCGGAUCUC  
>P5326  
CGCCGUCCAGCCUGAAGGCCACCAGCGCCUCGCGGUAACGA  
>P5327  
GGCUGUACGCUGCGGUGGCAGGCGUGCUGGCCGGCGUGGA  
>P5328  
CCAGACACCAACGGUCGGAAACCGCCAGACACCAACGGUCG  
>P5329  
GCCAGGUCCGCUACCUGGAAGUUGCUGGAGUACACCAACC  
>P5330  
GCUUGCUGAAGAUGAAGGGGACAGUGAGCCAGAGGCCGUUG  
>P5331  
AGAUGAUGAGAGUGAUGAAGAGGAGGAGGAGGAAGAAGAGG  
>P5332  
GUUUUGCCUAACCCAUUCUCAACUUUCCAUUUUCUUUAUU  
>P5333  
CUGAUAGACGUCAGACACGGAACUCUGGUUGCUGUUUCGU  
>P5334  
CGACAAUUUCAUUCAGCUUUACUGGCCUAUAUUUUUCAACC  
>P5335  
CGCGGGCGAGGUGGAGGCCAGGACUCUGACCCUGCCCCUG  
>P5336  
GCGCUCCCGGAGCCGGCGCGAAGCGGCAGAAGCCGAGGCGG  
>P5337  
GGCACCGACAGCCGGCCCGGAGACCCGGGAGCUCGGCGCCG  
>P5338  
CGGGAGCCCCAGGGAGGCGGAUCUGGGCCCCGAGAAGGACA  
>P5339  
CGGAGGCGAAGUGGCGGCGGAGGCGAAGGGGCGGCGGGACC  
>P5340  
GAAAAGGGCGACGGUGGUGGAGUCCUCCGAGAAGGCCUACA

>P5341  
GGAGGCGAAGGGGCGACGGGACCUGGGCCUGGCCCGUGUGU  
>P5342  
GGGGGACGCGGGAGGAUGGAGCAAGUGGAGAUCUGAGGA  
>P5343  
AUAUCCACAGCCACUGGAGAAAAGAAGAAAUGUUAAAA  
>P5344  
GGUCCGGACUGAGGAGAAGAAGGCACCGCGGAGAGUGAACG  
>P5345  
AAAGAGAAAAAAGAAACAUAAAGUAAUGAAUGAGAUCAAG  
>P5346  
CCCCGUCGGGAGGCGUUCGACGCCCGCUAGGAGAGAGAA  
>P5347  
CGUCCCCGCACGUUCCGGCCAGGGCCUCCUCUAGGGCCG  
>P5348  
UCACGGCUCCCCGAUAGCCGACCCGAGUGGUCGGGGAAGC  
>P5349  
CCUCAGUGGUGAAAGAAGAAACUUGAUUCGGCAGAAUGAC  
>P5350  
CGGCGGCGGUCGCGUACGCAGAACAGGAGCCGGGGGAGCG  
>P5351  
GCUUCCCGCCUCCACGGGGCAGCGCCAGCGGCCUGGUCCUU  
>P5352  
AUUUGGCCCGUGUGUCGAUACCGCCCUCUGGACGUGGUGA  
>P5353  
CCGAGAUCCGUCUAGCUUUACUUGCUCCCCGCCGGCUCAG  
>P5354  
GCCGCCGAGGGCCCGCUCCAGCCCCGGCCGCCGUCGAGC  
>P5355  
CCCGGCCCGCGACCCCGGCGACCCCGAGCCGAGCCUCGUC  
>P5356  
CUCGCGCUCGGGGCCACCACAGCCUCUCCGGGCCGUCGUA  
>P5357  
GGGCAAAACAGGAGAAAGACAGCAGAAAAACCCUGAGGAGA  
>P5358  
CCAUCGCACUCCUGUCCAGACACUGGUGUCUGCACGAGCG  
>P5359  
UGGGACCUGUGCGGUUGGGAUAUUGCUUUUCCUUUUUUG  
>P5360  
CAGCAGCCGGAGGUGUCGGGACCCUCUGGACCCACCCUAGC  
>P5361  
GGCGUCUCCAGGUGAUUGCGAUUGGGGAAGGUAGAGGAGC  
>P5362  
UCCCCGGACGUGGGGGAGGAGCGCCGGGGAGGGGGCGGGA  
>P5363  
CCCUCCCACAUCAGUCUCCAGACCCUUGGGGCUUCAGAGG  
>P5364  
CCAGUGAGAAGCCAGGGGGCAGAGGGACUGCUGGCCAGGAU

>P5365  
CCGCCGUUCCCGCUCCUGCCACAGCUGCAAGGUGUCCGGGC  
>P5366  
CCCAGGUCCCAGAGAAAGAAGGAUGUGGGUGCAAGCAGCC  
>P5367  
GCGGCCGAGGCAAGUACAGGAAGGUGAGGGCUGUGAUGGGG  
>P5368  
GCCUGGGGAGCCCAGCAAGAAGAAGAAGGACGGGCUGGAG  
>P5369  
CCUCCUCCACCUGAGUCCCCACCCGGGCCGCCUGCUCCCGC  
>P5370  
CCCGAGAAGAGGGAGCCCAGACCUUGGAGGAGACAGGGCC  
>P5371  
AACCCUCCUCCUUCAGGAAAUGUCCUCGGCCUCCACCUC  
>P5372  
GAGAACGCGGGAUUCAGCCGAGAAGCCACGGGGAGCCCGAG  
>P5373  
AUUAACAGGGUAUGAUUAUACCAAGCCAAACAUCAUCAUG  
>P5374  
CGACCACCGAGGCCCAAGAAAGAGCCGCAGACGCUCGUCAU  
>P5375  
GCAGACCGCAAAGCGCCGGAAGAAGCGGUAAGCGGCAUGGC  
>P5376  
ACGGGGGUUCUCUCACCAACAGCUGUGAUUUCAUCCGAAG  
>P5377  
AUCUCCUUGCGCACAUCCGCAGCCAGCAGCACCGCAUCCAA  
>P5378  
GCCGCGCCGAGAGGGGGCCC AUGGCGAGGAGGCGCAGCCCG  
>P5379  
GUUCUUGCUCUUCGAGGGCGAGAAGUAAGUGACGCCGGCUG  
>P5380  
ACAGUUUCUCAGAUUGAAAUAGAAAAGUAUUUCCAAAGUUU  
>P5381  
CUACUCCUCGGUCCUGGUGAAGAGGCUGCGCGCUGCUGUU  
>P5382  
GAGUCCUCGGCUCCAUUCGCAGCCAGCGUGGCCUGUGGAGU  
>P5383  
GGACCAGGGUUUGCCCAGAAACGCCUCCGGACUGGGCACUU  
>P5384  
AAUAUCCACCCAACAACAAGCAAAGUUUAUUCUACUUUGAA  
>P5385  
GGAGGUGAAAGUAUUGGCGGAAGGAAAAUACAGCGGAAAA  
>P5386  
CCCUCACCGCGGCCUCCCGGAGCUGGCACGCACCCUAAUCU  
>P5387  
CAAUUGGGCGAGGGCACAAAUUAACCACUUACCCCUUCUC  
>P5388  
CCGUGCCCGAGUUGCCGCCACUGCGGCGUCUGGGCUGAGC

>P5389  
UCAGCGCUUGCCUCAGCUUCAGACUUCAGCCCAGGUGCCAA  
>P5390  
GGCGGCGGCGGGGGAGAGGAAGAGAAAGAAGCGUCUCCAG  
>P5391  
GUGGGUGUCGGUGUUGGUGAAGGGAGUCGAGGCGAGGGGC  
>P5392  
GUGCCCCAGAGCAGAAGAGAAGGCGGGCUCUACCUCAUG  
>P5393  
GGAAGAGGAAGAAAACGAUGAUGAUGACGAUGAUGAUGAUG  
>P5394  
CGGCACCGGCUACGUGCCCGAGGAUGGGCUCACCGCGCAGC  
>P5395  
CGUAGCCCCACAGCACAGGAUGCCGUGGCCGCCGCUCACC  
>P5396  
UUCGAGGGCUGUGAGAGGAAGAAGGGCCAACGCUGGGGGU  
>P5397  
CUCUCUGUCAGUCAACAAGCACCGGGACUGAGCCUCACGG  
>P5398  
CGCCAGCAGGAAACCAGUCACCGUGUCCUCGUCUCCGAUC  
>P5399  
CGCCCGCAAUUGCAAUGGCACGGCGGGCAAAGGGAAG  
>P5400  
CCUGCGCCGUGGAGACUGCGACCGCGCCGGCUCUCCGCAGC  
>P5401  
AGCGUGGGCGCCGCCCGGGAGGCCUGUGGGUGGCUCCGGA  
>P5402  
AUACAGAAGCACAGUCAGCAAAGCAAAGACCCUCGGGGC  
>P5403  
CCGACAGGAACGGCUGCGGCAGAAGCAGGAGGAAGAAUCCU  
>P5404  
UUCAGAUGAGAUUCCCAUCUGAAAAGAUGGAAGAGGAAG  
>P5405  
AAGUGCAAGCUAAAAGAGAAAGCUCCAAGAAGACAAGCCU  
>P5406  
CGAGAUCAAGGCGGACAAGGAGAAGGGGUUCCGGGUGAGAG  
>P5407  
UGUCGGUGGGGAGGGCGAGGAGGGCGGAAGGACUGCAGCA  
>P5408  
GCAGGGCCGCGGAAGCCGGAGAGGAGAAGAAGAGAAGGAG  
>P5409  
GAGUCCCCACCACACAGCGAAGGCCGCGCCUCAGCGUUUCG  
>P5410  
CAGGAACGGCUGAAACGAAGAAGAAGAGAGAGAGAGAAGA  
>P5411  
CGGCGCCGGCCUCGGGCUC AUGUCCCCGUUGAACAGAGCC  
>P5412  
UGCGCAGCGGAGAGCCCGGAAAAGCGGGAAAUGGCGGCGC

>P5413  
GGAGAGGAAGGCUCAGGGUCAGGGAGGUCCAGAACAGGGAG  
>P5414  
CCGCUACCAUGAGGCCCGGAAAGCCUUCUGCUCCUGCUG  
>P5415  
GAGUCAGUGCGCAGCAGGGCAGGUUCCUGCGGAGCCGCCGG  
>P5416  
CUUGGGCAGCUGUCCGGGAGUAUAGAGGCCAGUAUGUACCA  
>P5417  
UCGAACCGGAUGGCCGAGAAGAAGCUGGCUGAUUGCGAGA  
>P5418  
AGCCAGCGAGGAGCGGCGGCAGAGGAAAGGCCAGGCAGGCG  
>P5419  
CGAAGUUGCGGGGGGGUCCCAGCUCUUUCUGCCCUACCGC  
>P5420  
AGGGGAUGGAAGACGCGGGGAGUGAGCUGGGUGGGCCUGC  
>P5421  
CUACCUUGUCACACAGCUCUAGACCUGCUGUCUGUGUCCUC  
>P5422  
ACUGGAUCUGGCAGUACCAGAGCAGCAGCAACAGCAGGAGC  
>P5423  
GGACGGGCGGACGGCUCUACAUUCUCCAGUGCCAUGGCCA  
>P5424  
GAGAGAGAGAGAGUGAGAGGAGCCGCUGAGCCCACCCGAU  
>P5425  
UCAGGGAUGGCACAAAAGAAUAUCUUCAAGCAAAAUUGAC  
>P5426  
CUUAUUUUCUUGCCUGGAACAGAACGCCGCGGUCCGUA  
>P5427  
AAGCCAGUGUGUUAGAAGCAAGUUGAUUAUUAACACUGAGA  
>P5428  
GCAGUCCUGGAGCUGUGAGGAGAUUCGGGCCGUCACCCUGC  
>P5429  
AGCGAGUGUGGCCUCGAGACAGUCCUGACCGACGCUGCUAC  
>P5430  
CCUAGACACGGCUUGUACAACGUCUCACGUUUUCCAUG  
>P5431  
GACACGGGCCAGGCAGGAAGAGGGUGCGGACGCCAGUGAGG  
>P5432  
CGAUUUUGACAGUGGAGAUGAAUCCAGAAGCGGACAGAC  
>P5433  
UGACAGGGCUUUGCUCCUCCAGAGAUUAUCUGCAUCCUCA  
>P5434  
GGAGCCGGGGCCGGGCGCCAUCAUGCUGAGCCGGCUCGGG  
>P5435  
CGAGCUGAGCGCCGAGCUGGACAAGGACCUGCGGGCAAUUG  
>P5436  
GGAAAUGAAAGGGCUGUGGGAGGAAUGCCUGUGAGUCGUGG

>P5437  
AGUCCUCCCUGCCCGCCUCCAGGGCCUUGGCCACCCCUCCC  
>P5438  
UCUUGAAAGCGGAGAACAGGAAGGACAUGC GCUCCUCGUCC  
>P5439  
GGGCCUGGGAUUCGCCAGCAACGCCUUC CAGGUGAGAAGCC  
>P5440  
GGUCCCACUUGUCGUCGCAGACGGUCCCCCAUUCUCCAUUU  
>P5441  
AGCCGCCCCUCUCGUCGAGAAAGGGGCUCAGCGGCGGCGG  
>P5442  
GCGGCGGCCGGAGCCCGAGGAGCUGUAGCAGCCUAGUCGC  
>P5443  
AGGGAGGGGAACGUGUGGGCAAGAGACUUC CUGGUUUC  
>P5444  
UGGCCGAGGAGACAAGGCAGAACGAACUUCUGGCCGACGAG  
>P5445  
AGACCUAGCAGCAGAGAAAGAUGCAGAGAU CGUGAAGAGA  
>P5446  
UCAGGAAGUGCAAGGGAGAGACGGGGCAGGGCGGGCCGG  
>P5447  
UUGACCAUGCACAUCUCCACAGACAGUAACAGGGCAACGAA  
>P5448  
UAGAAUAAUAAUCCUUGUUAAUAUACUUGUGGCGUUGCA  
>P5449  
CCCGGCCUCCAGCUGACAGGAUUCCCUCUUC CUGUUUCUG  
>P5450  
GGCCGCACCGUGAGGGGAGGAGGCCGAGGAGGACGCAGCGC  
>P5451  
GUGCUGAGAGGAACCU GCGGAUUCGGCCGAGAUGGGGUCUG  
>P5452  
GAAGUGGUAGCCAUGGAUGGAUGGGCUGACUCGUAGCGACG  
>P5453  
GCUGUAGUCUCGCUGAAUGAACACCUUUC CGGACACCGGCG  
>P5454  
CGUGGGGACGCAGUCGGGGCAC CAGGAAGCGGGAAGACAGA  
>P5455  
GGUGAGCUUAAUGAAUGAGGAUGAGAAGACUGUUGUCCGGC  
>P5456  
CGCCGCCGCUCUGUCGGGGGAUCCGGGGGCCCGCGCAGCUG  
>P5457  
CCCGGGUGGCAGGAGCCGCAGAGGCUUGGGCUGCAGGUAG  
>P5458  
GCUGC GGAGCAGGGCAGGGAAAGCCGGGAGGCGGGCCCGGCC  
>P5459  
UAACGGUCCGGCGGGAGGACACGGCGGUCCCUACAGCAUCG  
>P5460  
CCAGCACCCAGGCCGUCUCCAGCUCCAAACACGUCAAUGGC

>P5461  
AGGCCUGAGCCCGGCGAGCAGGAGAGGAGGUCUUCGGGC  
>P5462  
GGCUCGCCGCCCGCAGAGUAGCAGGCCAGCACGCACAGC  
>P5463  
UUCGCUGAGAACCCTAAAUGAGGGCCUCGCGCUCGGGAGUC  
>P5464  
ACGGCUCCAAAGAAGAGGGAAAUAACAAAAUAAUAUUCUG  
>P5465  
ACAUGGUUUAAGGGGCGCUACGGGGUCCGGCAGAGCCUGU  
>P5466  
GAUGGCUGAGAGGCAGGAAGAGCAGAGAGGGAGCCCGCCU  
>P5467  
AAGGAGAAGAUGUUGCUGCCACGAUCAGUGCCACAGAGACC  
>P5468  
CGGGACGCGAUGGCGGGCGGAGAGCCCGCGAGCUCGGGCCA  
>P5469  
UUUUA AUGGCUUUUCAGCCA AAUUCAGGGCAUGAAGAAUG  
>P5470  
GAGGAUGAGGAUGAUCGACGACAGUAGACAGUAUUCUGA  
>P5471  
CCUCCGCCAUCGUUUCUGCGAGGCUAGGGCGCCUGCGGC  
>P5472  
ACGUCCUCCUGACUAAAGGAAAACGAACCGUGCUGUAGC  
>P5473  
AGAGACCGGGAAAGGGAGAGAGAAAGGGAAAUGAGGAGGAG  
>P5474  
AGAAGAGGAUCAUCAUGAUGAACAGGAAGAACACGGGGAAG  
>P5475  
GCGGCCGAAGGAGAAUAGAACAGCGCAGGCAAAAGAAGAA  
>P5476  
AUGAGAAAUGGAGAGAAGAAACUCAAGAAAUAGUGAGCA  
>P5477  
UGAGGACCGUUACCUACCACACUCUUCGGCUGCCCGGACUU  
>P5478  
GGGAGCUGCUCGGAAGCUACACCUCGCAAGGGCUCSCCCCU  
>P5479  
GGAAGGGGGGAGCGCGGGGAGGAGGAGUACCUCGGCCAAG  
>P5480  
GAUUGUCAUGGAAGUCAUGGAGGAGUUAGAGUGCUGAGCUC  
>P5481  
GUGAUCUGGGGGGAAGGAAAUUCSCGUCGGCGGCCAGUAG  
>P5482  
UAGUGGACAGCAGCGGGGCCAUUACCUUCCAUGGCCGGCUA  
>P5483  
AGAAGAGGACCGCCGCCUUGAGGGAGGGUGGAAACUGGGU  
>P5484  
AGGUGGGUCUAGGCAGGGGAAUUGGGGUGCCACCAGACGG



>P5485  
UACAACAUUAACCUUUAAAUAGAGAUCCUAAUUCUUAAAAA  
>P5486  
CCCGUCGCGCGGGUGCCCGCAGCCGGCGGGCCCGACCGCGA  
>P5487  
UGGCGCACAUGGACACCGUGAGGACGCUGUGCUCGGCUGAG  
>P5488  
UGUGGAGAUCAGGGUCGGGGAGGUCAUGAGGUAGGUAGGGG  
>P5489  
GAUCAGCAGAGCAGGCAGGCAGAGUGGAGAGGGAGAGACGG  
>P5490  
ACUUCCUCUACGUCUUGGAGAUCCAGGUCGGACGGCUGGGA  
>P5491  
GCGAAGUUGGGAACCCGCGCACCCAGUUUAGCAGCCGCGGA  
>P5492  
GGGACACCUUACCUGGCUCCACUGCCCUUCUGCGUCCUGCG  
>P5493  
GCUGACCCCGAGGGACCCCAAGCGCAGCGGGUGCGGCGAUG  
>P5494  
UGGCCUGAAGGAGGGCGACUACAUUGUGUCAGUGAAUGGGC  
>P5495  
CGGCGCGGCGUAGUGGAUGCAGCAUCCUAGUGGAGGACGCC  
>P5496  
CCCACUCUUCGGGCGCCCUACACCUCCCCGUGCCUGUGAG  
>P5497  
UGCCCUCCGGCAGCCAGAAAACUACAGCAGAAGAGAGCGCA  
>P5498  
AGACUGGGGGCCUGGGCAUCAGCAUUGCGGGCGGCAAGGGC  
>P5499  
GGAGCCACAGGGCCCUCCCCAUCAGGCUGCAUGCCCUGCAG  
>P5500  
GCAGCCUCAAGCAAUUCUCAAAAAGACCAAGAAGAACCAC  
>P5501  
CCCCACACUCACUCCUGAGACCCUGGCCUCCGGCGUCAG  
>P5502  
ACAGCGAGCUGACCACACUGACGAGCCAGUACAUCAAGUUC  
>P5503  
CGGGCAGUCAGUGCGGGGGCAAGGCAGCAGGCAGGGUACC  
>P5504  
AAGCAGCGCAAUCUGUCCUGAGGCUGGCAGCAGGGCCAGGG  
>P5505  
AUUCGCAGCUUCUCCAGGCCACCUGCAUCCUUGUCUCAGA  
>P5506  
AAUCUUCAGGCCUGAGAACAACACUCUCCUCGCUGUCGGAG  
>P5507  
GCCCGCACCCGGCCGAGCCAGCGUGGGCCUGCCGGGUUC  
>P5508  
CGGUCUGGAGUUCUCAUGUACUGCAACUUCUUAACAACA

>P5509  
GCUCUGUUCCAGAGGACGACACCGAUGGCCUGACCCCGCAG  
>P5510  
CCUGGAGAGGCACCAGAAAGAGGAAUGCCAGGACAGGUAAC  
>P5511  
GGAUGAGACCCAGGGACAGCAGCCCCUCCAGUUGGAGGAGG  
>P5512  
AGGGCUGGGGGCGGGGGGUGAUCACUUCAGCAGGCACAACA  
>P5513  
UCCGCGCCUGGGCGUGGCCACACAGACGGCCAUUGCGGCG  
>P5514  
ACCCCAGCUCGGGAGGGAGACUCCAUCCUACUCCACCCCA  
>P5515  
CUGCCCACAGAGGUAAAGACAGGUCAGGUAGGCUGAGAGA  
>P5516  
AAGGAGUUCGGCAACUUCAGCAGACAUGCAAGCCCUGGA  
>P5517  
CUGCAUGGUGCCCUUCUGCCAUUCCCCGAGUGUCUUCAUCC  
>P5518  
ACAAGCAAGCCAGGCAGCCAAAGAGAAGAAGAAGAGGAGG  
>P5519  
UCCUCCUCUUCAUUGCUUUCAUCCUCACUCUCUCCUCUUU  
>P5520  
GCUUUUCCCUUUAACUCCAUUCGUAGCAACUCUGGAAAAC  
>P5521  
AGCAACCGCCUCCGAUCACCUCGCCUCCAUCUCUCCUCC  
>P5522  
UUGGCGGGCGCGGCGGGUACCGGGAGGCGCAGUGAUUA  
>P5523  
UGACCCUUCUACCCACCCAGAUUUUAUCACUUCGUCGG  
>P5524  
CUGCUGCUGCUGCUGCUACUGCUGCUGCUGCUGCUGCU  
>P5525  
AGGGUAAUGAAGCUGAGCCCAGGUCUCCUAGGAAGGAGAGA  
>P5526  
CCCUGAAGAGGCCAGCACGAACCGGAGGGCUAGAGACAGCG  
>P5527  
CCGCAGCCGCUAGUGCUUCCACUGCUGCCGCUGGCCAACGC  
>P5528  
CAGGUGGGGCGUCGCUUGCCAUCCACGCAAGGGACUCUGC  
>P5529  
GAGCUGGCGCAGCCGGGGUAGUUACCGCUCCUCCGCCUCU  
>P5530  
GCUGGAGAGCAGCUUCGCGGAGCGACUGGAGAGCCAGAGGU  
>P5531  
GAGUCGUGGACGUGGAAACAACAACCGGAAAGGAAGAGGCG  
>P5532  
UGUAUAUGAUGACUUCAGUGAGCAGUGACCAUUGUCGAGGU

>P5533  
GCUCCCGACAGCCCCUAGGGAGAGCGAACGCCACCACCUCC  
>P5534  
GCGGCUACAGGCCCGAGUGGAGAGCUGGAGCGCUGGGUGU  
>P5535  
GCCUGCUGGCGUUGCUGAGGAUCGGUUCCACUGCGCGACAU  
>P5536  
GAGGAGACAGAAGAGGUGGCAGAGGCAGCCGGGGCUCAGG  
>P5537  
UGCCGGGAGGAAGGAAGCGCAGUGACAGUGCCUAAGUUGGA  
>P5538  
GAGCGGCGCCCGACAGAAGGACAGGGGCCUGCUGUCCUGAG  
>P5539  
UCCCUUCCCCGCAGCUGUGAGGUGGAGCAGUGGGACUCGG  
>P5540  
GCAGGCUCGGGCUCCGGUUCAGGAUCACGCUUGGGUUCUGG  
>P5541  
GGGAGGCAGAGCAGCGUCAGAGCCGCGCAGGGGACGGGAGU  
>P5542  
CCAGGAGGAGUAGGAGCAGGAGCAGAAGCAGAAGCGGGGUC  
>P5543  
GCCGAGGAGGAGGUGGAGGGAGGACCGGCGGCCGCAGCGGC  
>P5544  
CUGACCCAUGGAUGAUUCUCAUCUGCUUGAUAAACGUACUC  
>P5545  
GCGGCCGGAGCCUCGAAAAGAGGUGAGUGGGCGGCGCGCGG  
>P5546  
GAAGUGGGCAGGACUUGGACAAACUUUCCACCGGCUCCGC  
>P5547  
AAGAGAGGACGCGGUCGAGUAGGUGUGCACCAGCCCUGGCA  
>P5548  
CGACGAGGUCCUCGAAGUGGACCCGUUUGCGAAGCGCCAGG  
>P5549  
CCAGGCACGCGAGGCCCCUCAGGUACGCCUCUCUUCCUG  
>P5550  
UGAGUCCUCCACUUCCCCGCACACGUUUCCUGGCUGUCUA  
>P5551  
GGAGGAGAGCCUGAUCCAGGAGUCGGCCUCCAAGGAGCAGU  
>P5552  
GUCCUGCACCAGGCGGUCACAUAUAGGUCUGAUCUAAAACAG  
>P5553  
UUUUUGAACCUCAGGUCACGAAUGGAUUGGAGUGAACCGG  
>P5554  
GGGGCAGAGCGGUGCUCAGGAGUGCGGCCCGGGGCCCGCGG  
>P5555  
UCCUCCUUCUUUUCUCCUUGACCCUUCACAUUCUCCUCAU  
>P5556  
GUUGCAACAGUGAAGCAGAUUUCUUCAGUUAAAUACCU

>P5557  
CAGCCCCAAAGAUAAUUGACACAGGAGGAGGCUUCAUUUUA  
>P5558  
AGUAGCCAUGCGCGGCUUGGAGGAGUCGGGGCCUCGGCCUA  
>P5559  
AGCACGGGUGUUGCCCGCCCACCCAGCGCCCGGGACACAGC  
>P5560  
CAGCGGCGGCGGCGGGCAGAAUCCCGGCUCCCGGCCCGCGC  
>P5561  
CCGCCGCCGCCGCCAGCACGAGGAGGAGCAGCCGGGGA  
>P5562  
ACUUUCUAUCCGUCCGCGUCAGCGCCUUGCCACCCUCAUCU  
>P5563  
CUAGGUUGGGUUGGGUUAGGAAGGGCUGGGCUCGGGAGC  
>P5564  
CAAAGGCAGGGAACAGAACAACUCUCUAGCCGGGGCCGCUA  
>P5565  
GCUUCUCCAGGCCUGUCUACACCUCUUCGCCCUACUCCAAG  
>P5566  
AGUGGAGGGGCCGUUCGAAGAGUCGUGAGGGGGUGACGGGU  
>P5567  
CGGAACCUCGGCUCSCCCCCAACGAAACUACUGCUAAGCCA  
>P5568  
UUGUAAAAGACACUGGCACC AUGUUUGACUAAUACCAUUC  
>P5569  
CGGAAACCUCGCAGGGUCAGACCGUAGCGACGCGGGAAGUC  
>P5570  
AUGCUGCUGCGCUUGGCCUCACUGCGCUCUCCGUAGUUGUC  
>P5571  
CUCGGACUGAGGCCAAGAUAAACCAGCCAUGCCAGUAAGCCG  
>P5572  
CCAGGAAGCCCAUCUGGUCCAGCGAUGCCCUCGAGGCCUCG  
>P5573  
UCGGGGGCGCCGAGCCCCUAUGCCGCAGCCUCUGGGCACC  
>P5574  
GGAGUCUGGCCACCAGGCGCAUCGGUGGCGGAGGCGGCUGC  
>P5575  
UCCUGCAGAGAGCCCUCUGAAAGGAUGGAUGCAUUCUCCA  
>P5576  
GAAGGCUUGUUCUCUGGAACACACCUGCAAGAGAAGAGGAA  
>P5577  
AGGUCUAGCGGCGCCAUUUUAGAAUAACAAGCCGCGGCAA  
>P5578  
CAUGACGCCCGAGGACCCAGAGGAAACCCAGCCGCUUCUGG  
>P5579  
UGAGGGUUAUGGGGAGCCUGAGGUUUUAUGGGCCUGUGUAU  
>P5580  
AAAGCAGUACGACUCGGUGGAGUGCCCUUUUUGUGAUGAAG

>P5581  
AGGUGAAGAUGAUCAGGCUAACGGCGACGAGGCCGAGUCCC  
>P5582  
CCUCUUCUUCAUACCCUCGAGCAACCCACAGCGUCCACU  
>P5583  
AAGCGAUGUUUCCCCUCGAAAGGCCGUAGGCUACGCCGUCA  
>P5584  
UUCUUGAAGACAUCCUUGGCAUUCUUCUUGUUGUUGGCGCC  
>P5585  
UCUCGUGCUCAGUCUCAGCCAGUUCGUGGGCCACCUCUCC  
>P5586  
GCGCAUUUUGUCAUUUCAGAAAUGGACCCAAGUGGGGUCA  
>P5587  
ACACCCCAACCAAGCCCCACGCCUCUACCUCCCCAGGA  
>P5588  
UUGGUGCACCGCAGACCUGCAGGGGAAGGCGGGAGAGCUU  
>P5589  
AGAGGAGGAGGCAGCGGCAGAGAAGGAGGACCGCGGUGAGC  
>P5590  
CGGCCGGGCGCGGCGAGCCCAGGUGAGUGGACGGGGUGGGG  
>P5591  
AGGGAACUCCACCGCAGGUCACUUCUGCGGCCUGGGAGCUG  
>P5592  
UCUCAUUUJGCAGGAGCAGUAGAGAACUGUGGACUAUUCUG  
>P5593  
AGAAGAACGGUUCUGGGGAGCAGAGGCCAGGACCAGUG  
>P5594  
CCCGGACCGAGAGAAGAAGAUGGGGAAGAGGAAGGGAGGG  
>P5595  
UUCAGAUGAAGACAGGUGGUUGGUGGAUAUGAAGAAACUG  
>P5596  
UUCUUUUGCUGCUUGGGAGACUGGGGGCCGUUGGGAACAG  
>P5597  
GCUUUAGGAAAUGUCUACUGAGGACCCUGGGACUUAAGAAG  
>P5598  
CACACAGCCGGCUGCCCUUGACCCGGGAGGCCCCGGCUCUC  
>P5599  
GCGACGGCGGCGGGGGCGGUAUGGCGGAGCUGGUGCAGGG  
>P5600  
GCGAGAGACUGGGCCGCGACACUAAGAAACAUCUAGUGGUG  
>P5601  
CCUCAUCUGUCCAGGCUGCGACAGUGACUGUCAUGGGAGCC  
>P5602  
AGCGUUGGCUGCUUCGACACACUGAGGGCGGCGCGAUGGGA  
>P5603  
GGCUGUCCUCUGACCCCAAAGGCUUGCUCUCAUAUAA  
>P5604  
UGAUCCGAAAACACUAGAACAAGAGUGUGGCAAAGAACC

>P5605  
AGGGACGCCGUGACCGCUGAGGGAUCUCUGGGAUGUCCGU  
>P5606  
CGUCCACAAAGUACUCCCAAGGCCUCGCCUCAAUUGUUC  
>P5607  
CGACGAACGCCUGCUGCAGGAGGCCUGAAGCGCAAGGAGA  
>P5608  
AAGAGAAGGCUGCUGAGCACAGGCCAAGUCCUUGGGGGAG  
>P5609  
GGUCAGGACUCCCCGAAAUCAGGCACCCUCCUGCCCCACUG  
>P5610  
GUGCAUCCUGACAGGUCACGAGCUGCCCUGCCGCCUGCCGG  
>P5611  
CGAGCGAGCGAGCCGAGCCGAGCCUCCCGCCGUCGCCAUGG  
>P5612  
CUUGGAACCUGAAGGAACAGAGCCCCUGCUGGCCUCCUGGU  
>P5613  
GGCCAUCGGAAUCCAGGGAGACCUGGGCCCCAGGGACCC  
>P5614  
GCGGCCUUCAGGCGGCGGGCACCGCGGCGGGCAGGGGCGCC  
>P5615  
GUGGAGAAGAUGGAGAACCA AUGAAAGGACUGGAGUCCAA  
>P5616  
CGCGUCCCACGUCCCGGGGGAGGCGGCGGGCCGGGGGCGGG  
>P5617  
AUGGCUGGGACGCGGGGCAGAGCGAGGUCUCCUCCAGGCC  
>P5618  
GGAGAAGAUCUUCGCGGGCAAGGUGCUGCGGCUGCACAUCU  
>P5619  
GCAUGGAUGGAGGGUGCCUGAGGCUGCAGGCAGGGGAUGAC  
>P5620  
CUGGGAAGUGUUCAGGCCAAGGCUGGGGAGGCUGGCCAG  
>P5621  
AGGGGCUGCCAGGAGGACACAGAUGGACGCCUGCUUCGGGU  
>P5622  
ACCCAGGGACUCGGGGAGUAUGCCGCAUGCCAGUCACACG  
>P5623  
AGCUCAGAAGCGCACACGGCAGCCACGGGGCAGCGGCAAAG  
>P5624  
CGGAAGCCUUCGGUCGGUGGAGAGGAGAAAGGGAGAGGCCU  
>P5625  
AGCCCCAAGGGUUGCCGCGCAGGUGCAGCGGUCUAGAGCG  
>P5626  
GUGGUUCGUGGAGGUGCUGCAGAACGAUCUGCAGGCCAACA  
>P5627  
GGAGCUGUGCCGGCAGAUCAGGAGGAGGAGGACGAGAAGC  
>P5628  
GCCACCAAACGUCAAUUAGAAUGAGACAUGUGUUGAAA

>P5629  
CAGGCACCGCAGUACCUGGAACAGGUAAUGACGGGCACGGC  
>P5630  
GCGUGUUGUGGUCAAUGUAAAGACGCGACCGUCGUAGUCU  
>P5631  
AUUUAAAUCCACUCAGGGGAGAAAGUGCUGUGCUUCGAGC  
>P5632  
GCAGAGAGAAGAAAGAAGGCAGAGUAACCUACAAGAAGUUU  
>P5633  
AGAGAUGGUCAGUGGUUUUAAGCCGGGAUCAUAAACACUGU  
>P5634  
CCUCUGCCCGCCGUCGCCAUGAUUCCGGUGUCGCUGGUG  
>P5635  
GGGAGAUUCGGGACCAUGGCACCUGUGCACGGCGACGACUG  
>P5636  
AACAGAGAAGAGGAGGAGGAAGAAGAGGGGAAGUAUCAGGA  
>P5637  
GGAGAAAUGGAGAGGCCAGGAGAGGGAGAGAAGGAACUAGC  
>P5638  
GGCCGCAGCACUGCGGGGCGACACGGAACGGGCCGGCGGGA  
>P5639  
GAGCCCCAGCCUGAGGGGAGAGGGGAAGAGGGCCGUCGCC  
>P5640  
GGCACGCAGGACUGGGAUCGAGGCCAGAAAACGGAGCAGC  
>P5641  
CCUGGCCUAGAGCGGCCUUAAAGUGCCAGGGAGAGGAGGG  
>P5642  
UCUCCAGCUGCAGGAGGAAGAGGCGCGGCGGCUGAGCCCC  
>P5643  
UCCUCGCACCUGCCCCUUAUCCCCUCCUCGCCCCCGCCC  
>P5644  
UCCUCCCCUUGCUCGGUCCGAUAGUCCUGGUCCCGAUAGUC  
>P5645  
AUGGAGACGGCGGCGGCUGUAGCGGCGUGACAGGUGAGGGC  
>P5646  
GACGUUGGAGUGGACGUGGAGCGGAUGCGCUGUAGGGGGG  
>P5647  
CCCCCGCCCCUAGCGUGGACAUUUAUCCUCUAGCGCUCAGG  
>P5648  
AGGGGCGGUGUCUGUUCUGAUCGCUGUGUGUCACCCGGGC  
>P5649  
GGGGCCAAGCCUCCUCAACUAGACCUCAACCGGCCAGGAU  
>P5650  
CGUGUGGGCCCAGGUUUCGUAGCGGCGACACGAGAGAGACG  
>P5651  
GGGCAGACUGUCUCACCCGCACUGGCGGUCCCCGGCUCAA  
>P5652  
CCUGGAACUCCGGACAAACAACUACCAGCUUUCAGAUGAAC

>P5653  
GCCGAACACGGCCCACGGGCAGGGCGCCGAAGAGGAGCAGG  
>P5654  
GACCGCCCUACCCCCACGCCAGCCCCAAACUAAGAUUCCC  
>P5655  
UGAGCAAGGCAAGAAGUGGGAUUCAGGAAUGGGCCAAGCCA  
>P5656  
AGGGCAGUGAUGAUGAUGGC A AUGAAGGUGACAAUGAAGGC  
>P5657  
CACAGACACCAGAGGCCUACAGCAAGAUCUGAAGGAUACGC  
>P5658  
AGGCAACCACACAGUUUGGAAGAAACGGAGCGGGACGAAGA  
>P5659  
GCCAAGCGGCGUAUUGAUGAAUCAAUAAGGAGCUGAACCA  
>P5660  
UCAACAAGGAACUGGCCUCAAGAACAAGGAGAUCGAGAAG  
>P5661  
GCGAAAGAAGGAAAUGGUGAAGGCUGAAGAGGACACACAGU  
>P5662  
CUGGGGAACCCGGCUUCGUCACUCGGAUGUUAACUAAAGGC  
>P5663  
CAAUCCAACCCCCUCCACCACCCCAACGACUCCGUUCUC  
>P5664  
GAAAGAGAGAGCGCGAGGGAAGGAGGAAGGAAGGAGGCACC  
>P5665  
AGGGAUGGCUGCAGCGGCAAAGGCGCAGGCGGCGCAAGUC  
>P5666  
GGGAGGAGAUGGCCUUGCCAGAUGAUGAUGACGAGGAGGA  
>P5667  
CCACGGCUGAGAGCGCCGCCACCGCAGCUGCUGCCGCCGUC  
>P5668  
GGAGAAAGAGGUCUUGCCAGACCAGGUAGAGGAGGAGGAAG  
>P5669  
CCUCGCUAAUCUCUUUGGGACCAGAGGGCGACAACGCAGC  
>P5670  
GCUUUGAGGCUACAGGCUGUAGUCGGGAAGGGGAUCGGAGA  
>P5671  
CCCAGUGAUUCCCCAGUCCAUUUGACCCAUGACCCUGCC  
>P5672  
GGGAGGGGGAGGGGACCGGGAACCAUUUGAAUGAGAGGAGG  
>P5673  
AUCUCCUCGGAGUAACGGCGACGCUACACGGCCUCUCCCGU  
>P5674  
UAUGCAGUGCAUAUGCUUCAUCAAAAGAAUGCACCAUACUG  
>P5675  
CCCAAUUCUCUAAUAACCUCACUGGAGGUUAACCAGGCAGG  
>P5676  
GAGAGACACGCCUGAAUGGCAGCAGCAGGCCUAGCGGCAA



>P5677  
AAAAGCGCCGGCACUCCGCGAAUUCUGAUCCGGCCUUUAGUC  
>P5678  
AGUCUCCUGGAAAAGGCAGAAAGAAAAUUCGGAAGAUUCUU  
>P5679  
AGUUGGAAGAAAAUCAGCGGAGCUAUAAACAGAAAAAGAAA  
>P5680  
GUUGUGACUCUUCAGAGGAUAAAAGAGUAAGAAUGGAGCA  
>P5681  
GCACUGGAGUCUUAGUCGUCACUGUAGCUGCUGCUGGAACC  
>P5682  
GAGCGAUGGAGGCCCGUGCAUGGAAGUCCGAGGGAUGGAG  
>P5683  
GUUUUCUCCUUCUCUCGUGAAACUUGUGCCGAAACCUACA  
>P5684  
GGAAUCCAUGAGACAAGACAAGGGGGGCAUGGUGUGAGAA  
>P5685  
CGAGGGAAAGCCAGAAGAUGAAGUAGAGCCUGAUGAUGAAG  
>P5686  
GCCUGGGAACAGGAAGGAGAAAAGAAUACCAAAGUGACA  
>P5687  
GCUCAUCUACUCCUCUUAUCAUUUCUUCAGGGUCCAAAUGC  
>P5688  
GGAGAAGGAGAAAAGUGCCCAGAUAUCCUUCAGGUUAGUAU  
>P5689  
AAGGACUCUCAGGAGGACUACAAGAAAGGCAUCUGAGCAG  
>P5690  
AAGAGAGGUAGACAGAUACAAGAUGAAAUCCUGUCAAAAAA  
>P5691  
GGUGGUGACGCGCGGCCUCACGUGACCCAGAGCUGCAGAG  
>P5692  
GACCUGGAAGAAGCUGGACCAGAAUUAGGAGCCCAGGAAC  
>P5693  
CCCAGCGCUCUGCGAGGCCUAAAAGGAGGAGCAACCUGUC  
>P5694  
UUCUGUAAGUCCUCCUGAGAGUCCUUGGGGAAUCGUCCG  
>P5695  
GGCCCUUUCUGUGGCCUCAGAAAGCAGCGACAGUCGCAG  
>P5696  
CGGAGCGUCGGCGACUGCGGACAGGUUAGAGUGGGGGCAGG  
>P5697  
AUGUCCUGGAGGAGCUGGAAACAGAAGGGGAGAGGCAGCUG  
>P5698  
CCCGCUGUAGGCCAGGUUGCAGACCAUUAGGUUAGACACAC  
>P5699  
CUUUGGGGAGGGGAGGGGGAGGAAGAGUAGCUCCUUCUU  
>P5700  
ACCCUCUGCUCGCCCCGACCACUUCACCCUGUCCUGGCGCA

>P5701  
AGUCUGCUCUGACACUCGGGACCGGGAGGAAUAUGACGACG  
>P5702  
GGCAGCUCAGAAAAACUGAAAGAAAGAAGAAGUGGUCAA  
>P5703  
GAAGAGAGGAGGAAAUGGAAAGAAGAAGAGAAACGAAAAAG  
>P5704  
GGCGGCGACGGCGGGCGGUACACAACAGCUGCAACACCAGG  
>P5705  
AAAUAUCUUGUACCAGCCCAGGGGUGAAGAAGCCCCGGC  
>P5706  
GGUGGGUGUGGGGACGCGGGAGCCAGUGUCGUCGGAUCGGC  
>P5707  
CAAUGAGGAGGAGGAGGAAGAAGAGAGGAGGGCCUGCUGA  
>P5708  
GGCACCAGCUUCUGCUUCAAGCACCCGCCAGGCCUCC  
>P5709  
CUCCCCUCGAGCCGCCGGAUGUCCCCUGCGCUCUGUUC  
>P5710  
GGCCCGGGCGGUCGUCGUGGAGGAACCCGAUCCCUUCCC  
>P5711  
CAGCAUUGAACUAGUACCUAGCAAAGUAGGUGGACAUAAA  
>P5712  
AGAGGGAGAGCUUCCUGCGCAGAGGAGACGGACGGCGGCGU  
>P5713  
CCCAGCUUUAUCUUUCCUUGAGCUGUGACUUCACCCAGCAU  
>P5714  
UCCAGGCCGAGACGCCUCUUCAGCAGAGUCACAGGAGUU  
>P5715  
UCCUGCUCACCUCCCAGGGACGGCAGAGAAGGGCUGGCC  
>P5716  
AUUGC GGGCGGCGAUGCGGAAGAUGAUGGCGGGCUUGGUGG  
>P5717  
UGUGGUAAAAGCCGUCCGGAAGAAUGGCCGCCGCCGCCGCG  
>P5718  
AAACCAGAGACGAGAGGGAAAGUGAGACAGAGACGGACAGA  
>P5719  
CGGGGCUUCGGAAGGAGCCACAGAGAGGGCGGGGCGUAGG  
>P5720  
GCCUGGCCAGGAGGGGCCUCAGGAACCCGUUGGCUCACGAU  
>P5721  
GAAUUUGUCUCCUUAUGCCACCCACAGACCCGCCAUCCCC  
>P5722  
CCUUGAUGCAGGAGUAUGUCAACAACAGGUGAGGAUGGGAA  
>P5723  
AGUUGAUCAAGAAGGAAAAGAGAAGAGUAAGAAGGACAAG  
>P5724  
GAGUAGUGAAGGCCACUUGAAGCUGGAGGAGAAACUAAAGC

>P5725  
GCAGGCGGUGCAGGCGGUUC AUCUCGAGUCUGACGCUUUC  
>P5726  
GGGUGAAAGGCUGCCUCCCG AGACUCUCCUUGCUUGGAAU  
>P5727  
GGACGAGGAGGAGACGCCGU ACCUGGUCAAGCUGCCCGUGG  
>P5728  
AGGGCGCAGGAGGCCUGAGG AGUGGCUACUGGAGCCGUGUG  
>P5729  
CAACCCGGCUGAUGAUCUCU AACCCGCACAAUCAACCCAGC  
>P5730  
GCGCUGCGCCCCGCGCCUGC AGAGCCUCAACCUCACCGGCA  
>P5731  
CGCUCGGGGUCCCGGUCGCG AGGAGGAGGAGGAUGUGGCGC  
>P5732  
CCACCUGGCUCGCUUCCCCU ACCCGCCUGGCACUCUCCCCA  
>P5733  
GCCUCGAGCUGCCUGAGCUG ACACGAGGGGAGGGGUCUGUG  
>P5734  
ACCUGGAUACCUGUGAGGUC ACGGUGGAGGGAGAGGAGCUG  
>P5735  
GCGGGGAGCUCCGGGGGUCC AAGGAGGAGCCGCCGCCGCCG  
>P5736  
ACCUGCUCGUUGAUCUGCCC AUCCCCGCCCGGCGGUCCUC  
>P5737  
UCGCCGCCACCGCCACCGCC ACCGCCGCCGCCGCCGCCGCCG  
>P5738  
GGUGCUIIUGGGAACGCGGG ACGGGCGAUCUGCGGCGCCAG  
>P5739  
GCCCCACUGGUGCCCGGCUC ACCUUGGUGCUCGCCUGACA  
>P5740  
GUCUCCUCUAAGGCCACCU AUCAAACCUUCUGAGAAAUG  
>P5741  
AGACGUACACCUUCAUUAUC AUCCAAGCAUAGGAAAGGGUC  
>P5742  
AGCCGGCGCGAUGGGCGGAG AGCAGGAGGAGGAGCGGUUCG  
>P5743  
CUUCCCCCGCUCAGCCCGGC ACCAGAGCCCCUCCUGGGUC  
>P5744  
GGAGUAGGCAGCGCACACC ACCAGCUCUCCAGCUCGGCCCCGCC  
>P5745  
CUCCAGCGGCGGCAGCGGCG ACGGCGGCGGCAGCAGGAGGC  
>P5746  
UGCCCGUUCUCGCCGCCGC AAGCUCUCCGGGACGAUGGUGC  
>P5747  
GGUUGAACAGGAAACACAUG AGCCUAUCAAAUAAUAAAA  
>P5748  
GCCGGGCGGGCGCGGAGCG AGCGGAGAGCGGGCGGCCGUG

>P5749  
CGAAGAUGGCUGAGAAGCAGAGCAGCACGACGGGCGGGUGAAG  
>P5750  
GCGCCCCGCCCCGGGAGAGCCAGGAGCGCAACAAGCAGCGGC  
>P5751  
GUCAAGUGCUUCUGCUCCUGAUGUGGAUGACCCAGAGGCAU  
>P5752  
CCGGAGCUGCGGCGGCUGGCACAGGAGGAGGAGCCCGGGCG  
>P5753  
GUCUCCAGGAGCCCUUAGAGACCGAGUCCCGGCGGCGACGG  
>P5754  
CGAGGAUGGGACCGGGACGGAGGCGCCCGCACGGAUCCC  
>P5755  
GAGGUGAAGGAUGAGAACGCAGGCGUAUUGGAGGUGAAGCA  
>P5756  
CUCUGCAUGCCUCCGAUGAAACUCUGCCCCAAAAGCAGAC  
>P5757  
UCAGCUGAAAAGUUGAGAAAUAUGGAGGAGAAAUGUGAAUC  
>P5758  
CAGCACGAAGUCCCGCAGCCAGCGCAACAUGGUCCCAGAGG  
>P5759  
UUAGGCGAGUGCGUGCGCCCACCCUGCGCCCCUCCUCCG  
>P5760  
AAGGAGGGGACCCAGCCCUCAUCCGAGAGACGCAGGAGAAG  
>P5761  
CUUCGGGAGAAAAAGUAUUCACGCCCCUAUAAUUUAAAAAA  
>P5762  
GCGGCUACGCGGGGAUUCUGAGGACCAACACGACUCCACCG  
>P5763  
CGCGAGGUUCUUCUCAUCCCACUGCCCUUAUUUAUUUCUC  
>P5764  
CAAGGCCAUGGGCAUCAUGAACUCCUUCGUCAACGACAUCU  
>P5765  
AGGUGGCAAGAUGGUGUUGAAAGCACUAUGGUGUGGUGAG  
>P5766  
CCCUGAGCCGCCGCCCGAAGAAGCCGCAGCCACCACCGC  
>P5767  
GUGGUGGGCGCUUUGGUUCCAGAGGAGGCCAGGAGGAGGG  
>P5768  
GAGCCUGAAGCUGGGGCUGAGGACUGCUCAGGGAAGCCUG  
>P5769  
GGAGAAAAGGGAAAAGCAGAAAGGAAAAAAGGAAGAGAGA  
>P5770  
CCUGCUGCUGCAGAACCUGGAUCUUGCGCUUCACCGCCUCG  
>P5771  
CAGAGACUGGCGGUGUCUUAAGACUCCGGGCACCGCCACGC  
>P5772  
UAGCAGAAGGAUGACCCAAGACGGGAAGCGGGCUGCUGAGC

>P5773  
ACUAGAAUAUAAAUAUCCGUAAACAGCAUCUGAGCAUUAGU  
>P5774  
CCUGCCUCAGGCGUCGCGUCAGCUCCCGUGUCCGUGCCCUU  
>P5775  
AAAACAAAGAGAAAUGGAGAAGAAAGAAAGCAAGAAAAAG  
>P5776  
GGAGCUAAAGUUGAGGCUGGACCCGGAGCUGAGGUUGAGGC  
>P5777  
GGAUAGUUGGUGCUGUGAUGACUGGGGCAGCUGGGGAAGAG  
>P5778  
GGCUCCCAACUUUGAGGCCAUACCACCGUCGGCCGCAUCC  
>P5779  
UGGAGGAGGAGGCAGAGAGGAGUGGAGGGCGGAGUAGACGG  
>P5780  
AGAAUCUGUGAGUCGCCUGGAGGCAGCGCGGCGGCUGCCGU  
>P5781  
CCCACCCCGCCUGUCCCGCAGCUGCCCGCGCCUUAGUCUG  
>P5782  
GGGGACGUUUUUCAGGGCGGAGAGGCGGACGCGACGGAAGC  
>P5783  
GAGGGGGCGGGGCCGCGAGGCCGUGGGUGCGGCACGAG  
>P5784  
CGCCGCCGGGUUAUGCGGACAGUAACGAGGGAGGGCUUCGG  
>P5785  
GCCGUCGGUGCUUCUGAAUGAGCCCCACCAGGAAGGUGCAG  
>P5786  
ACUAUUCAGGUAAUUAUAGAAAUGCCAAGUAGGAAUUU  
>P5787  
CCUAUGGGACGCAGGGCCCCAUCUGUCCUCGGUCGCCGUG  
>P5788  
GCGCACGCCUCCACGACUGGAGCCGAACAUGGCGCCGGGAA  
>P5789  
CGGGGGCGACGGCGGCGGCGACGGCGGGGGCGCGGCCCGCG  
>P5790  
GCGGGCGGCGGGCGGGAGCCAGGCCCGGGCGGGGGCGGGGG  
>P5791  
CCUUCGCGGUCCUGCCGCCACCGUCCACGCUCAGCGUUGU  
>P5792  
GUCAUCUUUCACGCCAGCGGAGUUUUAUGACACGGGCUAA  
>P5793  
CAAAGAAGGGGAGCGGGGGCAGAAGGCGCUAGGCAAGCAC  
>P5794  
CGACGAUCAGGGUUUCCAGGAGGGGAAGAUGAGCUCGGGG  
>P5795  
GAAACAAAGGGUGCUGGCGG AUGUCUCCCCUCACGCCCAGC  
>P5796  
UGGCAUGACAGGCGUGAGCCACUGCGCCCGGUCCUGAAACA

>P5797  
GUGGGCUGCAUGGGUGGCGGAGGUGGAGGCGGAGGUGGCUG  
>P5798  
CCUGUGAUGGGUACACCGGG AUGUUUAACCACUGGUUUUCU  
>P5799  
CUCCACUGUAAUUGUUCCCC AUUCCCAUUCUCCAACUGAU  
>P5800  
CCUGGAAAUAUUCACCCAAC AUCCGUGCCCCGCCUCCUAUU  
>P5801  
GGGCCGGACGCGCUGCGCGGACGGGACGGGGCGAAGGAGGC  
>P5802  
UCUGAAGAAAUUUCCGGAGUAGGGCUGAUGGCUGAGCUCUG  
>P5803  
ACCGCUGCGCAGCCGCCCGCACCGCAGCAGCAGCUCAGCAG  
>P5804  
GAGUACCGCGGCGCGAGGUUAGUGGUAGCUGGGUGCAGACG  
>P5805  
CCCAGAAGCCACAGGCGCAGAGCGGGGCGGGCGGGAGUGC  
>P5806  
GGGCGCCUCGCCUCCGGCCC ACCUCCGGGAGCGGCACCUG  
>P5807  
UCCUUGUCAUUCUCCUCCCGAUCUUGAUUAUCUCUGUCCU  
>P5808  
GAGGACAGGUCUCAUAGAAGAGAUGAAGAGCGGCCCCCGGCG  
>P5809  
GCAAACGCGGAGGAAGAGCUACGAGAGUAUCAGGAGCGGGU  
>P5810  
AGACGACGACUUCUACUCCAAGUUCUCCACGGGCUCUGUGU  
>P5811  
UGACAGUCUCAGCCAGGUACAAUGGAGGGUCCAGGUCACAA  
>P5812  
CCCGCUGCGGCUCAGCCUCAUCCUCAGACCCUGCGGCAGC  
>P5813  
GCGCGGAGGGGAAGGCAUCCAGGAUGCGGUGCGGGGCGGCC  
>P5814  
UCUGGCUCCAUGUUGGGCCGACAGACACAGCCUCACAAA  
>P5815  
CUGGAUGAUCUCCUCCGUGGACAUCUUGAGCACCUCUCC  
>P5816  
CGCCCCCCCCGCGUCCCCCAGCGCGCCACCUCUCGCGCC  
>P5817  
CCCACCGCGCCCCUCCCCAGCCUUCUCGCCUGCGCUCGG  
>P5818  
CGGUGGCUGCGCGGCGCUGGAGCGGCGGCGGGGGCCUUGGG  
>P5819  
AAGAUGGAGGAGGUGGAAGCACGCAGGAAGCAGGAAGAGGA  
>P5820  
CCUGCUGGUUUUGACUUUCACUAUCCUGGUCAUCUCCUAC

>P5821  
CCGACGGCUCCGCCAUGGCUACGCGAGCGAGGGUGGGAGAA  
>P5822  
CACGCACUCUCGUGGCCACAGAUGUUCUGGUUCAGUCGGC  
>P5823  
UGGGGAGACAGCGCGACGCCAGGGUCGGCUACUGGGGGGCC  
>P5824  
AACACGGACGGUCAGGAAUGAGGGGCUCAGACCCCGGGUUG  
>P5825  
UUUGUGGCACAUGUGAGACGAGGUAGACUCUCCACUCUAG  
>P5826  
CUGCCCACCACCCCAUCUCAGAACAGAAGGGUGGGAAGCC  
>P5827  
CUCCAGGACGCCGCCGCCGAGUGUCACUCUCCCGCCGCU  
>P5828  
CACCCAGCCACCACCAGCUGACUCUCCCCGACCCGUCCAC  
>P5829  
GCGGACACCUCGGGCCCGAACCGUCCGUGACUCCACCUA  
>P5830  
CCUGAACCCUGCCCUUUCGAGCCAGCCAGCCUCCUCAC  
>P5831  
GACCGAGCCGAGCCAGGCUAAGGGACCAGUGUCUCCUGCC  
>P5832  
CCUGCAGUGGUGGGCAAAGGACAGUCCGGUGAGGAAGGGCG  
>P5833  
CACACUCAGUCCCCACCACACUGAAUCUCCCUCCUCACA  
>P5834  
AGAAACUGCCGAGGAUGGAGAGGAGGAAGAUGAAGGGGAAG  
>P5835  
CGUGCAGAGGGUGAGGAAGCAGGGGGUUAGGGAGAGUCCA  
>P5836  
GGGCAGGUCCAAGGGGAGGCACCAAAGGUGGGCGCAUCAUG  
>P5837  
CGACCCCUGGCCUCCCCAGGUCCACCUCAGGUCUGCC  
>P5838  
CGGGGAGGACGAAGACGAGGAGGAGGACGAGGAGGAGG  
>P5839  
GGAAAGGCAGCCCAAGGAUAGCAGGAGAUGUUGUUUGGU  
>P5840  
CCGUCUCUCGACCUCCAAGCACCCGAGGUAUCCCUUUCUCC  
>P5841  
AAAACUGUUGUUUGGCUAUCACUGUCUCCUUUAGACACUU  
>P5842  
CCGUCUCCUCUGGCUCCCCAGCCGACUUCAGCCCGGCUGC  
>P5843  
CAGCUUCAGCACCUUCAUGGACGGCUACACAGGAGAGUUUG  
>P5844  
GGCUGCCAGACUGGAAGGUGAUGGAGGACUGCCGAGACAUG

>P5845  
ACGCCGGGAUAUGGAUCGAUAUGGUGGCCGGGAUCGCUAUG  
>P5846  
ACCUGCAAAGAUGACCGGAGAGCUGGACGGCUUGGGCCGGU  
>P5847  
AAAGCAGGUACUCACCAAGGAGGGAGUGGAGACAAACUUGG  
>P5848  
GGAACGGUGUGCGACAUGGGAAGAAAACCAAGCGGACAGC  
>P5849  
AACCCGGACUAGGGAGGAAGAGGGCGAGGGAAAGGUCUAUG  
>P5850  
UGGAGUCAGCUAGACUACCAAUUGGGAUGAUGGAUGGAGCA  
>P5851  
AACCAGCGAGGCUCCCAAGAAGGAUGAGGAGAAAGGGAAAG  
>P5852  
UUGCGGAGACUCACCCCUUCAGCGUCGCUGCCCCAGCUCA  
>P5853  
CUAGGGUGGCGGGAGCAGGCAGCGGCGGCACCGGAGAGUCG  
>P5854  
GGCCCUUUCACCUCGUCCACCCGGUCCACUUGGGCCACC  
>P5855  
GCCGCGAGCAGAUGGCGCUAAAAAGACCCAAGAGCCCGCC  
>P5856  
GUGGCGGCUGUGGCAGCGGGAGCAGCUGCGCCGCCAGCGUG  
>P5857  
AGACUCACCGGCCGCACGCCAUGAGGGCCUGUGGGUGCUG  
>P5858  
CCUUCUCUACUUUUACCCAGAUCCUCUUCUACUGUACCAUC  
>P5859  
GCAGCAGUCAGCCAUUUACCACGCGGGGCUUGCGCCAACUC  
>P5860  
GCGCCGCCGCAAACCCCGAGCCCGAAGCUGUUGCAGCCG  
>P5861  
AGACCCCUACUCAUACCCAACUGGAAACCACACAUACCAG  
>P5862  
GCCGGCGGCGGCCAGCGAGGAGGCUGCAUUCCCGCCCGUGG  
>P5863  
AGGGACGUCGCGCGGCACAGAGAGGACCAGCCUGGACGCC  
>P5864  
CCUCACUGCGGCUCGCCAGCACCGCCUCCAGCCGGCGGCC  
>P5865  
UGGCGGUGGAGUCGCGCGUUACCCAGGAGGAAUUAAGAAG  
>P5866  
CAGCCCCCGUUCCUGCAUCAGCCAGCUCCACGCACGCAGC  
>P5867  
AUGCAGAUGGUCAGUAGGACAGAAGGUAACAUGAUGACUC  
>P5868  
CAGCACCGCUGCUACUCGCCAUGGCUAAGGCCGAGGGAGGC



>P5869  
GUUUCAUCCUGCGCCCUGCAAGAAGGAGCCGGCCUGCCUCU  
>P5870  
GGGCUCGGGCGGGGUAGGCAAUCCGCCUGACCGUGCAGU  
>P5871  
AGAAGAACAGGGCACACAGGAGGUCUGCACGGCCGACAACA  
>P5872  
UUUUCUCCAGUUCUCCUCCACCCUUUUUGCUACCAAUUCU  
>P5873  
GGGACCCUGGAGCCUCCGAAAACACCCAAGCCUGGAGC  
>P5874  
GAGGUGUCUGCAAGGAGAAUACACAGCAGCGAGGGGCUGCA  
>P5875  
AGAAAAUUGCACCUUCUCCAGAUCUCCACCAUACCUGCC  
>P5876  
CGCGGCUCCGUCAGGCCGCCAUUCUAUCCUGUGGCUAAGA  
>P5877  
UUCUCUGCAUCACUAUGAACAAUCGCUAUUCCUUUCCUC  
>P5878  
GUGAAGAAGAUGGGUGGGGAAGAAUUAGCCGGCGUUACCU  
>P5879  
CCUGUUGGUGCUGGUCCAAAAGGCACAGUGGAGGGUGUUGC  
>P5880  
CCUUAGGCUUUGCAAAGGCGAAAACCGGAGUCGGAACUUGG  
>P5881  
CGCCAGUAGCAGCCUUCGCCAGCAGCGCCGCGGCGGAACCG  
>P5882  
AGCUGUGCCAGACGAGGUUGACGGAGACUCGUCAUCACCGU  
>P5883  
GGAAAGAGAACGUGAACGAGAAAAGGAGAAAGAACGGGAGC  
>P5884  
AACGAAGGCAGCAGAGGAGCAGGAAAGUCGGAGAAGCGAGG  
>P5885  
GCCCUACCUGCCUCCUGCUCAGCCGUCCCCUUCGCAGUCCC  
>P5886  
GAUAAGAUGAUGGGUAGAAGAAGAAGAUAGUCGAGAGAAGAU  
>P5887  
UCACCUCGUAGUCGGCAACC AUCCGAAGCUUCCCCAGAAAA  
>P5888  
GGGUAAGCCAAGCGCCGCGCAGUGCUGAGUUCCCGCACGCC  
>P5889  
GUCGGCUUCUGACGUUUAACAGGGGGAGCGGAAGGGAGC  
>P5890  
GAGACACUAAGACCCAAGGGAGGUCCAUGUGCCUGGGGCC  
>P5891  
UGAGGCAGCAAGCUCGCUAGAGAGGGAGAAGCAGUCGGGCG  
>P5892  
CCGACCUGAGCGCCCACAACAACCACAUGGCCAAGGUGCUG

>P5893  
GGUCUCCUCUGUGGCCAUGUAGAACACGUCAUCCGGGGCGU  
>P5894  
AUAGACCUUCAGUUACAGAGAGAGGGAGCAGAGUGGGACCA  
>P5895  
GGGGCCUCCCCGCGAGCGGAGCGGGGACAAGAUGAAGUAC  
>P5896  
CUUGAUCCUCACUCACAUCCACUUACACAGACCCGCUUCUC  
>P5897  
UUACUUGCUGCUCCAACUGCAGUGCGCUCUUGUUCUCGUGC  
>P5898  
GAGAGAGGGAGGGAGGUAAGAGAGAAGAGAGGAGGAGGAGG  
>P5899  
CGCAACCUGCCCUCGGAGCUACAGAAGCGACCAAGGCACGU  
>P5900  
GCCGCCGCCGCCGCGGCUUCAGCACCAGCGCCCGGACAGCG  
>P5901  
GCGCCCGGGAGCGGCGGGAGAGGCGGGGCGGCAGGUGAGGG  
>P5902  
GGAACGGGCAGAGGCCGUUCAGGGAGGGUGGCAGCUGCUC  
>P5903  
GCCAUGC GCCUCCGCCGCCUAGCGCUGUUC CCGGGUGUGGC  
>P5904  
ACCCGCUCCAAGUCCGCCGCACCGCUGUCAUGUUCCGUGG  
>P5905  
CAGGGGGCCCAUAGAGGAGAACUCCCUUUGGUUGUGUCAGG  
>P5906  
CCGGGCCCGCUUACUGGGUGAAUGGCGGGUGUCUCUUCAG  
>P5907  
UGGCACGUGCCUAUAGUCCCAGCUACUUGGGAGACUAGGGA  
>P5908  
UGGCCAGAGCGCCAGGCAGGAGCAGGGGGCCGCGAGCAGCC  
>P5909  
GCAGGCAAGAAGCCUGUGGUAGGUAAGAAAGGAAAGAAGGC  
>P5910  
CUCAACUCCAGAACCUUCCGACCUCCGCUAGUCCUGCGGG  
>P5911  
GGUUCUCGUUUUCGCUUCUGACCCCUUUCUUCUUCUGGAAA  
>P5912  
CCACCCUUGGGCUCAAGUCCACACACCAACCCCAAGGAAC  
>P5913  
GAUCCGCGUCGCCAUCCAGGAGGCCGAGGACGUGGACGAGU  
>P5914  
GCAGGACCCCGCCCGGCCCCAGGAGCCCACCAUGCCUCCCC  
>P5915  
GCCUCUGCUCUCCUGCUUUCGCAGCCUCUCACCCUGCUCUCUGU  
>P5916  
GUGGGGGUGGGCGUGGAGAGAAUUCUUCUGUGGGUCCUCUG

>P5917  
UGGGAUUGGCAGCGGGCGGGGAGAAGGGCCGGGCUCAGAGGA  
>P5918  
CCAUAACAUAAGGCUUCAUUCAGCGCUCCAUAUGUCAUGACA  
>P5919  
CGGGGCGGGCCCGGGCCCGGGAGACGCGCCGGCAGCCCCGGC  
>P5920  
CGAGGUGGAGGAGCUCCUGGAGCAGGAGAGGCUUCGGCAAC  
>P5921  
GCCAGGAGGUUGCCACCGCAGUUGGGCCGGCCUUGGAGA  
>P5922  
GGUUGAGCGGGCUUUUUGGAAGUUUGUGGCGGAGGUGAGGC  
>P5923  
GAUGGAGAAGGUGCUACAGCAGCGGCGGGCGCUGGAGGAGC  
>P5924  
GGGGCCCGGGGAGGGGCCCGACGCUCCGGGGCGGAGCCCCGG  
>P5925  
UUUCUGCAGACAUAUAUGGACUCCUCCGCCAGCACCUCAC  
>P5926  
ACCGCCGACAGAAUGCAGAACUGCGAGAGGAAGAGCAGCA  
>P5927  
GGGAGCGGCGGCUAUGUACACCAUCACCAAGGGGCCAGC  
>P5928  
CUAUGAGGCGGGACGUGCGCAUCCUGUACUGGGCGAGGGU  
>P5929  
AGCCCCGCGGAGCGUAGCGGACAGGUGGAGGACCGAGCGGG  
>P5930  
GUGUCUCAGGUCCUUGGAAAGCCUGUGUCCACGGGAGGCA  
>P5931  
AGCAGGAAAGCCAGUUACCUAAAAGAGCCUAAUCCCCAAU  
>P5932  
CCUGAUAGGGAGACUUGGUGAAUACAGUCUCCUCCAGAGG  
>P5933  
GCGGCUUGCUGAUUGGGGGCACAGGCCCGGCGGGGGUGGG  
>P5934  
UCCCCGUGCGCCGGAGAUCACGGUCCCCGGGCCGCCGCCG  
>P5935  
CUUCUAACUUGAUUCUGAGAACGAUCCUAAUCGAUUGCA  
>P5936  
CGGGGAAACAGACGAUGGGCACUAGGACACUGCGCAUGUAC  
>P5937  
GCAGCCCCCUAAGCCGGAUACCCUCCCCACCCCGAGGAG  
>P5938  
UUACAAUGUCAGGAUACCGCAGCUGUUGAACAUUUGUCACU  
>P5939  
ACCCCCGCCACACUCCCCAUGCCGCCACCAGCAGCUCUG  
>P5940  
GAACAUGGACGAGCUCAAGCACAGGUCAUGAUCAACCAGU

>P5941  
UUUGUGUGUGUGUACGUGUGAGCGCAUCUGCGUGCCUGUGC  
>P5942  
UUCUUCAAGUCCUUUGGUGGAUUAACAAUCUGGAGGAUAAA  
>P5943  
CCCAGCAGAGGCCACUGCAGAGCCAUGCAGAGAUGGCUGGG  
>P5944  
ACGGGCCUUGUCAGGAAGCGAUGGCUCAAAUGGUACUGAC  
>P5945  
UGUUGCCUUUUUUUCCAACACCACCUCUAAGUCCGUGUCU  
>P5946  
UCCACCCUCAGCGGAUGAUAUCUCAAGACACCUCUGAGU  
>P5947  
GAGUGGAGAGGCCCGGGGCCAGGAAAGCAGAGACAGACAAA  
>P5948  
UGGGAACUGCUGAGGGUUGUAGGGGAUGUAGGAAGAAUAGG  
>P5949  
GAUUGACAAUGCCCCGGAGGAGCGAGCUCGGGGUAUCACCA  
>P5950  
CGUCCUCGCUGCUUCCACUCAACCUCUCCCACCCUUAAGC  
>P5951  
GGCCAUGGCGGAGAUCAAGCGACCUGGACCGGCAGAUAGC  
>P5952  
GGUGGAAGGGGAGUGAGCAGCACUCAGGAGGUGUCUUGAG  
>P5953  
AUUCGGUCAUUACCUCACGAAUUCGGGACAGUGUGGAG  
>P5954  
GUUCUGUGCCUUGGGAAGAGUUGAAUGGGAAGCGGCCAGCG  
>P5955  
CAAUUAUCCAGUGGGCGAAAGGUGGAUCAUUUGGGUGCAU  
>P5956  
CCCGCCGCGCCGCGCCGCCACCCUCUGCGCCCCGCGCCGC  
>P5957  
GGGGCCUGGUCGCAUGGCGACCGGCUGUACGCUACCACAG  
>P5958  
CCCAUGUUCUAUAGCGUGAAACAGGCGGGCAAGUCACGGCA  
>P5959  
UGGGAGCACUGGCACCCCACAGUGGGGGAGGGGAGGGGAGG  
>P5960  
CCAACGGCAAAGCUCUAGGGAGAGACCAUAGAGCCCCGGCG  
>P5961  
GGGGUUGGUCGUCCUCUUCGACGGAGCGCGCAGCUUCGGGA  
>P5962  
GGGAAGCGGGAAUCCUGCACAAUGAGCUGGGGGAGAGGCC  
>P5963  
CCCACCUGCCCUCGGCUCCAUGGUGAUGCAGUCGUCUGUGC  
>P5964  
GAACACGGACGGACCGGAGAACGGGUGCUGGAAGUAGUUGG

>P5965  
GUCGCGGCUUGGGACCCGGCAGAUGGGCAAGAAGGGCAAG  
>P5966  
GCCGCACCCCCAGCCCCGCCAGGCCCGCACUCCGCGCCCCG  
>P5967  
GAAGCUCACCACUGCUCAGGAGGUGCUGGCCCGGGCCCGCA  
>P5968  
CCCUUUCUGUGUGGGAAGCAGACCACGUUUGAAGGAGGGA  
>P5969  
AGCGAGGCGGCCGGACCCGCAGCCCCGAUGCUGCUGACGCU  
>P5970  
GCCAGGCUGCAGCAACGCCAGGAAGCUGGAGUGGCCACUG  
>P5971  
CCGACCAUGGCUCCACCGCCAGACUCCCCGCGGACCCCG  
>P5972  
GGAAGAGGAUGAAGAGGAUAUUUUGAAGAGGAAGAAGAGG  
>P5973  
GCACAGGGCCUGCUGAGGGCAUGGGGCCUGCUGAAGGCAUG  
>P5974  
GGUCCUAGGCAGCUCCCCGUCACGAGCUCCCGCUGCCGCC  
>P5975  
GUACGGGGAUAAAACGCGGAAGGGGACGGAGCCUAACACA  
>P5976  
CCGAGAGCAGCCCCAGUAGCAGCGCAUGGCCGGGUGGAAC  
>P5977  
AGCGCGGAGGCCGGCGACGGAGGAGCCAGCACACGGGGCA  
>P5978  
UCGGCCCGCAACCUCCCCAGCCGUCGGUGCCACUCCAG  
>P5979  
CCUCUCCAGCUACUCACCCACUCCCCUAGCUACUCGCC  
>P5980  
GAAGCUGAGGUGACGAAGGCAGCGGCGGCGGCGCCGUUUC  
>P5981  
CGGGCGGGGCCGGGCCACGACCGGGGCCGCGACCGCCACA  
>P5982  
CAACUAAGGGCCCCCACUGUAAGCCCCGCACCCCCACCCC  
>P5983  
GACCAUCAGGCGACAGAUUGAGGGCAGAGGGAGGCAGCAC  
>P5984  
UCUCUCUAAGGAUGGCCAGAGGAGAACUCCUACCCCUGG  
>P5985  
UUUCGUUGUUGAAUUUUCUCAGCAAUUUCUUGGGCAAUUUG  
>P5986  
GGGACAGGAGGACGAGGGCAACGGGGCCAGUACAGGGGUA  
>P5987  
GGCAAAGAAGGCGAGGAAGCACCGCUGAGGCAGAGGAGAA  
>P5988  
GGGCCUUGGCCAGCCUGGCCAGCCGCGAGCAGCCCCACG

>P5989  
UUCGUUUGUUCAACGAUUAGAGUCCUAUGUGAUCUGAGUUC  
>P5990  
GAUGGCGCCGAAAGCGAAGAAGGAAGGUGUGUGUUGGUGAU  
>P5991  
GGUGGCGGCGGGAGCCGGAGAGCACAGCCCAGGUGGUGGUG  
>P5992  
UGGAGGAGAUCGAGGUGGCUAUGGAGGAGACCGAGGUGGAG  
>P5993  
GAGCAGGCGGCGAGCGAGGGAGGGGGCGGCAGCUGCCAGCC  
>P5994  
UCCGGUAGGAGCUGUAAUCAAUUGUGCUGACAACACAGGUG  
>P5995  
UCGCUGCUGCGGCCGCAGCC AUGAGGUGAGGGCGAGCUGGU  
>P5996  
GUUAGACCCCAAUGAGACCA AUGAAAUCGCCAAUGCCAACU  
>P5997  
CCUCUGGAACCAAGCCAUCUACACUCUACCCCAUCUUUCCC  
>P5998  
GGAUGUGGAGAUGAAAGAGGAGGCAGCGACGGGUGGCGGGU  
>P5999  
CCUGCACUGAGGAGGUGGAAAGAAGAGGAUUGCUCGAGGAG  
>P6000  
GCGGCGGCUACGGGGGCGGCAGCUCCGGCGGCAGCAGC  
>P6001  
GGUACAGGAGCAGGUUGUGCAGCGUGGUGAUGGCAUAGAAC  
>P6002  
UGGAGGUCAGGGCCAUCUUCACGGGGUACUACGGGAAAGGC  
>P6003  
CAGCCCCUGGGGGGGUGCCAUCCAGCCUGGCUGAGUCCCA  
>P6004  
CGGACGGCACAGAGGGAGGGAGCGAGCGAGCAGUGAGUAAG  
>P6005  
GCGCGUAGCCGGGACCAUGGAGGGGCAGAGCGGCCGCUGCA  
>P6006  
GGCUGGGCAAACGCGAGGGGAUGGCAGGGGGAGGAGGCC  
>P6007  
UGAGGGACGUGGGUGGAGGGAGACGUGGGGAGCUCAGUCGG  
>P6008  
GAAGCUGGUGCGGCGCUACAAGCUGGCGAUUGCCACGGCGC  
>P6009  
CAUCUUUUUCCAGGUGAUUUACUGUUCUUUUGGUGGAACAU  
>P6010  
CUAGGUGGGUUGGGCCUGAGACCAGGGCACGGGUGUGGUG  
>P6011  
UUCUCCCAUUUUUCUUCUUCACUUCCACUCCAUAUAUCA  
>P6012  
CCGCUCGGCCGUCGCCCAACGCCGCCGCCACCGCCGCC

>P6013  
CGGCUUUAGUUCAGUUGCUAGGGAUCUGUGGAGGAUAAUG  
>P6014  
GCCCCGCCACCUUCAAAUUAUAUGAUCGUUGUUCUCAGUC  
>P6015  
CCGCGUCCUCUCCCCUCCCAACCCCUCCUCACUUCACGUC  
>P6016  
GCCUCGAUUCAGCCUCGCCAUCAGACUCGGGCUCUGAAUC  
>P6017  
ACCUACGAACCCUACCUACUAGCCCUACCUACUAACCCUAC  
>P6018  
CUUCACCCACACCGUCAUGUACUACGGCCACUACAGUAACG  
>P6019  
CGUUCUUGUUCUUGUUCUUGACUAUCUUCAUCUUGCCCCCA  
>P6020  
AGGAGCUGAGGAAGAGGUCGAGAAGAGCUUGGCGGAGCGC  
>P6021  
CAGGGCGGCCACGGCCAGGCACAGCAGAGCGCGGCAGCA  
>P6022  
CACUGGGUUCGCCACCGGGGAGGGACGGGGAGGCCACAUG  
>P6023  
CGGGUGGGUGGGACAUGCCUACACCUACAUCUAGCAGCCU  
>P6024  
CUGCGGGAGCAGGCACAGGGAGUGUGGAGCCUGGCGGGCGG  
>P6025  
GGCCCGCCUGGAUGUGCACGAUCUCCUCAUGGCGGGCGCG  
>P6026  
CGGGGCAGGCGGCGGCGGAGCGGUGCGGCGGGAGGC  
>P6027  
GCGUCGUUGGCGGCAGCGGGAGUGGGUGCGGCGGCAGCGGC  
>P6028  
UGUGCCGAUGCCGAGAAACAACUUGCCAAGUAUGUGUGGAU  
>P6029  
AGCUGCAGGACGCGAGCUGAACACGAACAGUCCUGCAGGCA  
>P6030  
AGCUCCGGGGCCCGGGCCCAACGGCGGGCGGCGGGCCCGG  
>P6031  
GGCCACGUGCCCACGCUGCAGGUCCUGCGGCCGGGGCUGG  
>P6032  
GGAAGCCCUGGGGAGGGGGAAGCCUCCAGGAGGGGUGGAC  
>P6033  
GCUAGCGUCGGUAGGGGUGGAACCCUUGCACGUUGUGGUUC  
>P6034  
GGACGAGGUGCUGUCCUGGAGGAGAAAGACCUGAGGGACC  
>P6035  
CGCCAGAGAGAAGGAAGGGUAUAACCCAGCGCCACCAUCC  
>P6036  
GUGGUUGUCAGCAAGACUGGAUAUGUGUGAGGUGUCUGUGU

>P6037  
GCGCCUUUGUCCCGGCGCCGAUCGGCAGCUCCCGGGGCCGC  
>P6038  
GCAGGGCCCCUGCCUCCCCGACCCCCGACCCACUGCAAUC  
>P6039  
CUGGAGGGCUGGGUGGGGCCAGAGCGGCGCUUCGGGGGCC  
>P6040  
CACCAUCACCACCUUCGAGCACGCGCACAACAUGCGGGUGA  
>P6041  
GUGGAUGGUGAUCAUCUGCAACAAGGCGUCUCCGGCAGGCA  
>P6042  
AAGAGGAGACAGCAAACUGAUAGAGAAACUGGACAUCAAA  
>P6043  
UCGACUUCUCCUCGGAGGUGACUGCUGCCUCCGAGUCACC  
>P6044  
GGAGAGGCGGGAGAAGCGGGAGAAGGAUGAGAAGGAGAAGG  
>P6045  
GGGCCGAGAGAAGCCGUGCCAGGGCCCGAGUCGCCCGACCC  
>P6046  
CCUCUCUCUCUAGUUUUGGGAGGUUAUCAGUGACGAACAUG  
>P6047  
CCCGCAUGGCGGUGGCGCUGAGGGUGGACGCGGCGGCGGUG  
>P6048  
CGGGGAGAGGCCGAACGCGCAGCCGGCGCGGGUCCUGAGA  
>P6049  
UGGAAUUCAUGGACGACACGAGCCGAUCCAUCAUCCGCAAU  
>P6050  
GCAGGCCCAGCAGGCCCAGAAUGUGCAGCGCAAGCAGGAGC  
>P6051  
UCCUGUUCAUCAUCGUCCUCACCCAACUCCAGGCUCGCCGU  
>P6052  
GUGGGCCCUGCCCCAGCCCCAUCCCAGUUACUGGCCCAGC  
>P6053  
CAGCGAGCAGGCAGAGUCCGAUAACAUGGAUGUGCCCCAG  
>P6054  
UCUGGAUUUGAGUCCACUCACUCCUCCUAACCCCCUCA  
>P6055  
GGAGGACAAGGAGGAAGAUGAGGAGGAAGAUGUCCCCGGCC  
>P6056  
CCGGGGAGGCCCCACACUGAGCCCCCCCCGCGACGCGCGG  
>P6057  
UGCAGGUCCGGUGUUUGUGGAGCUGCCCGUUGACGUGCUGU  
>P6058  
AUCUGGGGGAAUGUAUCAUAAGCGGGGAGGGGGCUUCGCG  
>P6059  
CUGCCGUCACCCCGGACCUCACUGUCCAGACCCUGUCAUG  
>P6060  
CACGGCCCUGCAGAAGCUGGAGGAGGCAGAAAAGCUGCAG



>P6061  
AGAUGCAGCUCAAAGAGGCCAAGCACAUUGCAGGAAGAGGCU  
>P6062  
AAAGGGACCCCUGAAGCUGAAAGGCGUCGCAGAGCUGGGAG  
>P6063  
UGGGCGCAUGGGGGGUGGGAGGCGGAUGUCUUUAGGGUCC  
>P6064  
AGUGGCCGGGGCAUCCCCGAAGGCCCCCUUCUCCUCUGGGG  
>P6065  
UGCCACCCCCAAAUGCCACAACGCCGCCCCUCUACCGCAUG  
>P6066  
CUUCCUCACAGGACUCCAAGAUCAGUUCGCCUGCCCCAC  
>P6067  
UGGGGACGUCCAGCAGCAGCAGCAGCGGUGGCAGGAACAGC  
>P6068  
GGUACUGGAUGGGGUUGAGGAUGCAGAGGGUGAGGAGGAAG  
>P6069  
GCCGGCGCGAACC CGCACGACCGCCGCCACCAACCAGCUC  
>P6070  
GGAAAGAACCACCUUAUUGACCUUCUUCUUGGGACGCAGG  
>P6071  
CUCUCUGGUCAUCGCCUGGGAGGAAGAUGCCACCGCCGAG  
>P6072  
GGUCCACUAAGACGGGGAAGAGCUCAAGGGGGGGCGACCGG  
>P6073  
CUGCCGCAUCUCACACGUGC AUGUCCCCGCCGCCGCCGCC  
>P6074  
AAAUCCUCGAGGGGCAGUGAAGGUACCACCUCUGCCACCAC  
>P6075  
GCAGCUGUUC CCCCACAUGGACAGAUGGACACACAGAGCCU  
>P6076  
CCCGGGGCGUGGCCCGCCCCAGCCAUCGCUGCCGUCGUCGC  
>P6077  
GACAUGUCCUGGACAAGGCAGAGGCGGCACUGGUGGCCAA  
>P6078  
GUCGGAGUUGC GGGGUGCGGAGGGGGUACGGGCCGGGCGCU  
>P6079  
GGAAGCCCGAGCGCUCCAGGACGCGCGGCGGCCGCGCCGG  
>P6080  
GUCCUUCUCCACGGCCUUGUAUGGCGAGAGCGACCUGUGAG  
>P6081  
CGGGCGCCGGGAGGUGUAGAAGACAGAUUCGAAACUGGG  
>P6082  
CAGGGCCGCCACCAGGCUCACAUCAUCAGCUCGGGGGU  
>P6083  
GGCGGCGGCGGUGGAGGAGGAGGAAGAGGUGUAAGAUUGG  
>P6084  
UUGGUCACUAUGGAGGAGAUAGGCAUCUUGGUGGAGAAGGC

>P6085  
GCACCUACAAUAAGAACAGCAACAUCCCUGGCUCAAGCGCC  
>P6086  
UGGGAGCUACGGCGGUUACAACCCGGCCCCUAUACCCAC  
>P6087  
UGGCCCCACCCCUCCACUAUCUCCUGCCGCCCCACUCU  
>P6088  
GCUCGGGCAGGGCGCGGACUAGCUCGUUCGCGGAGCCCGGC  
>P6089  
GAGCGGCCACAGAGCUGGCAAGGCUGGGCCGGGGGCUGGGC  
>P6090  
CAACUGGCAUGGCCCGAGCCAUGGCCGCCGCGUGGCCGCUG  
>P6091  
UGAGGCCAAAGCCACACUGAACUUGUUCUUGCGGUGAUUC  
>P6092  
UCCCCGCCCCUUGGGCCUAAGCCUUUCUGCUCACUCCCG  
>P6093  
GGAUUCUCACGAGUCGCAGAAAGUUGGAGAAAAGUUCGGUCG  
>P6094  
CAUCCCAGCCCUCAGUGUCCAAGACCCAGGCAGCCCGGGUC  
>P6095  
CGACCAUUCUUUCCUCGACCUCGGGAGCCCCUGCCACG  
>P6096  
GGGAUGCCGAGGUCUGUCCCACGCCCGCCCGCCUGGCCACC  
>P6097  
GAAAGGAGAGAGGGAGGAGGAGGAGGAGAGAUUCGGGAUGGAG  
>P6098  
CCCACCCCCACAGAGGCCUGAGGAGACCUCUGCCCAGGGAU  
>P6099  
GGAGCAGCAGCAGCAGCGGCAACAGAAGGAGGGUUCUCGG  
>P6100  
AGGCUAGGUGACCUUGGGACACUACGCUAAGGGAGGGAGGC  
>P6101  
GAAGCGGAUCGCAUGGAGUGAUGGUCCCACCGCAGCGGUGA  
>P6102  
AACAGUGGUGCGCGGAGAGGAGAGGUGAGUGUGAUGGAGAC  
>P6103  
GGCCUCUCGGGUCCGAGGAACGGGCCGAGGUCCCAGGGCGG  
>P6104  
GGUAGCCCGGGCCGCUUGGAGUCGCCCGGACCUGAGAGGC  
>P6105  
UCACCUUGAGCCAGCGCAGCAGGGGGCCUGCAAAGACAGA  
>P6106  
UUUUUCAGAUUCCAUUCCAAUAACGUGAAGCUGCAGUGU  
>P6107  
GGGACUGGUCCAGGAGGGGAGCCGUGCCGGCAGGGGCAGG  
>P6108  
AGAGAAUGAGGAAGAUGAGGAUGACACCGAGGAGGCUGAAG

>P6109  
GCCGGCGGGGCGCAGAGCGGAGCCGCCUCGGAGCCUGAGCC  
>P6110  
UCGCCGCGCUCGCGCCGCAGGGCCGCCCCCGGCCCA  
>P6111  
CAUGGCGGUGCAGCCGAAGGAGACGCUGCAGUUGGAGAGCG  
>P6112  
GACUUGGAAUGACUCUACUUAAUUGUGUGGUUAUUAGUCAU  
>P6113  
AAGAAGGCUCGCAGGCUGAAAGUCACCUCUGAGGCGCCUU  
>P6114  
GCCAGGGAAGAGCCGCUGCAGCCGCACAACCUACAGCCAC  
>P6115  
AAAGUCUUCUAAUAAAAGGUUCAUAUUACCACCGUCUUGU  
>P6116  
UGC GCGCUUCGGCUCGCGCACACAGCCGCCACCGCCGC  
>P6117  
GCCUCCGAACCUGACUUGCAGGGCUGUCUUUUGGGUCUU  
>P6118  
GGGAUGCAGACGGAGGUUGGAUGUGGAUGGAGGCUGGCAA  
>P6119  
CCUCCAGGCAGAAGCCCAGCACUCGCGGGCCCGGCGCGGCC  
>P6120  
UGUAGACCCCGCGAGAAGGAAGGUCGAGCCAGGUACGCGUG  
>P6121  
AUCAACGAAGUGGUAACCCGAGAAUACACCAUCAACAUUCA  
>P6122  
CAGCGGCUGGAGCCACGGGCACACGGCCCGGGUCGGCGGCA  
>P6123  
GAACGAAUGUCUGC UAAUGAACUAAACAAACAGGUCUCUUA  
>P6124  
GCCUGGGCCCGAAGGGAGCGAUGCUGUGGUUCCAGGGCGCC  
>P6125  
GAGACUGGGAGGGAGGGAGAAGCCCUUUGGCCUGCCUAC  
>P6126  
GGGGCGGAGGCGCAGGCAGAGCGAGCGGGAGGUCGCCG  
>P6127  
UGAAAGCCUCUCAAAUGGUGAAUUCUGCAUCACCAGCCU  
>P6128  
UGACGAGGACGAGGAUGAGGAUGAAGAUGAAAUGAACCCAG  
>P6129  
AUUUUAGGCAGGUAAAAAUCAGGUGACCCCAAGAAAUGG  
>P6130  
GGUAGACGAAGAAGAGGAAGAGGUGGGGAGGAAGAGGAGG  
>P6131  
CGUUUAGA UUCUGAGACGGGAGUGGAGGGUGAAUAGGUCA  
>P6132  
CUCCUGCUUCCCCAUCCCGAGUUCUCCUGCUCCCACCUC

>P6133  
GGGUACGCUGCGCGCCAUGGAGGGCGAGGACGUGGAAGACG  
>P6134  
ACAACGAGCGACAGAAAGACAGAGGCAACAGGGAGCGGGAC  
>P6135  
CUCCCGGCCAGCCAGCCCAGAGCCCGAGCUGCUGCCAGAGG  
>P6136  
CUUCAGGGGCUCUGUGGAGAAGGCCUCGUCGUGGCGGUGGA  
>P6137  
UCUUAGCACGAAUGCUCUAUGACCUUGGUUUAGUGUAAACA  
>P6138  
GCGCCCCUGGUGUCCCUCGCAGUGGACUGACGCCGCAGGGG  
>P6139  
CGAGAAGAUGGGCUGGGCCCAGGUGGUGAAGAAUCUAGCCG  
>P6140  
CACCUCAUCCUGUAAUCAAU AUGCUGCAGCAUCUUGCUGCU  
>P6141  
UCUUGCGGCCGCGCGCUGGCAGCACCAGAGGGGCCCGGGC  
>P6142  
ACACGCGGCGCUCUCCUGGCGAGCUGGCACCCUGGCGCUCC  
>P6143  
CAGCUUCGCGCUGGGACUCGAGUCGUUCCGCUCCUCACGU  
>P6144  
GCAGCGGCGGCAACUGAGGCAGGCUGAGGAGGAGGACGGC  
>P6145  
UGUCUGAGGAAGGGAGAGGGAGGGCCUGGGGUGGGUCCCCC  
>P6146  
UUGGCCUCACUUCUCUCCUCAUCCACACCAGCAGCCAAGUU  
>P6147  
GCUGAUCACAGAACAGGCCGAUAUCGCAUUGACCCGGGGAG  
>P6148  
AUACUGGCUAGAGAAUGUUCACAUGC UUAACAAGCUGAGGA  
>P6149  
CUCGGUCCACUGUAAUUUGGACAGGCAGGAGCGCCUACUUC  
>P6150  
GCAGGAUAAACAGCAGCUAGAGGAGCUGGCACGGCAGGCCG  
>P6151  
GGAAAUGGACAGCUGAACCAAGGUCACGCAGUGGGCCAUCU  
>P6152  
CUCUUUCUGUCCACCUUCUUAACAUAUACUCGAAUCAGCUG  
>P6153  
AUUCCGGUGGAUAUCUUUAUCUACAAAGGUUUGAUGAUG  
>P6154  
AUUCAGAUGUGCCGGAGCAGAGGGAUAGCAAGUGCAAGGUC  
>P6155  
CCCGAGGGCGAGAGCGCCAGAGGAGCGGGAAGAAGGAGCGC  
>P6156  
UCUAAUACUGGUAAUGCUCUAGAGGUGAUGUUUUUGGUAAACA

>P6157  
UCCCCUCCCCCUGCCCCACAGUACAUCACCCCCUCCCC  
>P6158  
UUUACAGGGUGGGGGGUGGGAGGUGGGGAGGGGGGCGAGGG  
>P6159  
UCCUUGCCCAUCAUCGCCUCAGGAGCAGCGACCCCCGCGCC  
>P6160  
UCGGCCGGGCUCGUCGUCCACGACCCCGCACGUGCCGCCG  
>P6161  
GGAGCCGAAGAGGGGCGCCAGGCACCAAUCUCCGCGUUGC  
>P6162  
CUAGCGAGUUAUGGCGACGAAGGCCGUGUGCGUGCUGAAGG  
>P6163  
AGGGUUGAUGUAAUGCAGUAUCCCUCCAUGGCUUGAGUUU  
>P6164  
CAGCGAGCCUCGAGGCCACCAGGACCCUCACAGCCGCCAUU  
>P6165  
AGCCAUGGCGGGACGGCGGUACCCGCCGGGCCGUUAAGU  
>P6166  
CAGCGCCCGGCUCGCGCCGCACGCGCCCGCCCGUCCGCCU  
>P6167  
GCCGCCCCCGCCAUGGGCCUAGAGCUGUUUCUUGACCUUGU  
>P6168  
AGAGAACGAGGAGGAAGGAGAGAAAUGGCGUCCACGGGUG  
>P6169  
GGUGGCCGGGCAUGGACCGAGGUGGCUUUGGUGGAGGAAG  
>P6170  
UCUGUGGUCCGGCUGCCCCAGGCUCAGUGAUCGCCCCAU  
>P6171  
AUGUAGCUUCCAUGCCUGGAAGAGGCACAU AUGGUAACAUG  
>P6172  
CGCUAGCCCUCCCGCCGUCAGUCCGCUCCCCGGUCGCUGC  
>P6173  
GACAGUGUGGGGUGCCUGGAACUGCUGAGGAGGUGAAGAG  
>P6174  
ACACCGAUGAUGGAUGAAGCAUGUCCAUGGCUGAGGGGAGG  
>P6175  
UCACCAGGAGUCCCCGGAGACAGCUGCCCCAGUGGAGGAC  
>P6176  
ACGCUCCCAGGAUUACCAAUUUCUUCGGGGGAAGGCCAC  
>P6177  
GUCGCCGCCUCUCUCGUCGGAGACGGGAGCAAACACAGAG  
>P6178  
GGACGGGUCAUCCUAGGGAAGCUCUUCACCUUCCCACGAU  
>P6179  
UCGCCACCACCUCCCUACC AUGGACCCCGCAAAGUGAAC  
>P6180  
GAGGGAGGCACUCUCCGUCCACAGCUCGGGUGCGCGCCCG

>P6181  
UGGGAAGACAGGAACCUUGAAUGCGAGUGUGGAAAAAGUUA  
>P6182  
CCCCUGACGCUGGGCGGGGCAGGGGAUGGUUCUCGGGGAG  
>P6183  
CACAUCCUGCUGAUGCCGUCAAAUAAGUAACCCGUCUUGCA  
>P6184  
CGAUGCGGCUACCCGCGUAGACCGUGCCGAAGCCGCCGCUA  
>P6185  
CAGCCCCGGCCUCGACAGUAUUGAGGCCCCGAGCCCCAG  
>P6186  
AGCACUUCUCCAGCAUGGGCAGGUAGGCAGUCGCUGAAGGU  
>P6187  
GCGGCCGGGAGCGAGAACGGACGGGAGGACGGACGAGCGGC  
>P6188  
CCGCCUCAGACCCCUUGUGAAGCCAAGAUCGUCAAAAAG  
>P6189  
CGGGCUCCCGGUGUCGGCGGAUGGCGGGAGCCCGGGGGCCG  
>P6190  
GCUGGUCCCGGCAGCGGCCAAGGCUACUGGGGCGGGAGCA  
>P6191  
GCCGCUUCCACAGCGAAGGGAGCUGCUCCGGGCACGUCGCG  
>P6192  
GGCGGGCGGAGAGAGAAGGAAGGAGGUGGUUGUGCAGGAUG  
>P6193  
GCAGGACAAGGAAGAUGGGGAGCCAAAGACCAAGCAUCUCA  
>P6194  
CAAGCCAAGGAGCCAAGACGAGAGGGACACACGGACAAACA  
>P6195  
ACCUGGAUGGGUUGCUCAGUAGGCUGGUGAACGGUGAGUUG  
>P6196  
CUGCCGCACCAUGGAGAGCUACCACAAGCCUGACCAGCAGA  
>P6197  
CAACAGUCCUGGCCGAAAAAGAAGCGCACUUGGCCAACCU  
>P6198  
GCCACCGCCCUCCUCCGCCACGAUGCCGGGAUCGACAAG  
>P6199  
CCCCGACUUGCGUAUCGCGCAGCUGCGCUUCCUGCUCAGCC  
>P6200  
UAAUAAUACAUUCUGCCACAACCUAAAGAUACUGAGGUAAC  
>P6201  
GCAACUACAGGUGGCACUGGAGCAGACUGGUUCCUGGACA  
>P6202  
AGUGGCCUUUGAGAUCUCCAGGUUCUCGAUGCUCUCGAUC  
>P6203  
CAUUAUACACCCUAACAAAAUCUCCCCUACAAUAAGUUCU  
>P6204  
CAGGACAGUCCACUCAGACCAGGCUGGAGACGGUUGUGUA

>P6205  
ACCUUCCGGCGGCCGAAGACACUGCGACUCCGGAGACAGCC  
>P6206  
CUGGGCAGGCGACCCGCCGCAGGUCCCCGGGAGGGGCGAAC  
>P6207  
CCCCGGGGGAGGGGUUGGACAGCGGCAGUGACGGCGGGAGU  
>P6208  
CCAGCCACAUCCUCAUCUGGACCAGUUUCUGACCACCCAAU  
>P6209  
GCAGGACAGGGAUCACAGGGACAGUGGGAGGAGAGGGAAGA  
>P6210  
CGGGGGCGCGGCCAGGAGCGAGGCCAGGAGCGCCAGCAGCG  
>P6211  
GGAGAUUGCGAAGAUGGCAGAGAUGCUGGUGGAGCUGGUCC  
>P6212  
UCUCUGUCUGAUAGCUGCGGAGUGAGAAGCGGAUUGGCUGC  
>P6213  
UAGCCGAGGCGCCGGCAUAUAGCAGGACCAGGCCCCACCGC  
>P6214  
ACCGCUGUCAAGGUCAGGAGACCGUCCCCAAACCGCUCCAA  
>P6215  
GGCCCGGAACCCAGCCUGGAGCGCUCUGAGCGGCCGGCUC  
>P6216  
AGACCAGCAGCAGCAGCAGCAGGAGGCACCUUUAGGCCCGG  
>P6217  
UUCGCGGCAGCGGCGGGUGUAGUCUCGGCGGCAGCGGCGGA  
>P6218  
CCUUGUGACACUGGGAUAAAACUUCGACAUUACUGGAAGA  
>P6219  
CCCGACUACAGAAGAGGAGAAACGGAAUCUAAUCAGGAGG  
>P6220  
GGACCCAUGGACAGUCUACACAAACGCCCUUUAACUUCUU  
>P6221  
GGAGGAGGAGGCGGCGGGAGGAGGAUUUCCUGCCGCCCC  
>P6222  
AACGCAUGAACUGCCUGGUGACGAAGGCCAUGGUGUGGCAG  
>P6223  
UCGGAGUCUUUGGAGAAGAGACAUUCAACGGCCCGGCUG  
>P6224  
GGAGCUGCUGCGGGGCGGCGACGGCGGGGAACGCGACGAGG  
>P6225  
AGGGAACAAGCGAUUAUGCUACCUUUGCACGGUCAGGAUAC  
>P6226  
GGAGGUGUCCGGGUAGGGCAACGCGGCGACACCCGAGGCCU  
>P6227  
GGGCGACGGGAGGCUGGACGAGCUGGGGCUGGAGGCCGGCG  
>P6228  
GGGAGGGGAGAGGAGGAGGGAGCCGGGCCCGGGCAGGUGCG

>P6229  
GGGCGUGCGGAGUGAGCUCAGGUGUGAGCGCCGGGGAGCG  
>P6230  
UCUCUGUCAGAUUUUAACCAAUCAGUGUGAUGUGAUCUGC  
>P6231  
GACCGGGACAAGGAACGGGAAGAGACCGGGAAAAAGACAA  
>P6232  
GGAAAACACACUAGGCAAAGAACUUGCGUCAAAAUCAGG  
>P6233  
CCAAUUUCAAAUAGGGAAGGAAAAGGGAAAAGAAGGGAAGA  
>P6234  
UAGCCGCCCGAAGAUCUGCGACCCACUCCCUCGGUGCUCUC  
>P6235  
AAGUCCCUAUUUAAGGAACAAGUGAUUAUGCACCUUUGCA  
>P6236  
GCAAAUAGUGGGAAGAUUCAUAGGUAGAGGCGACAAACCU  
>P6237  
UGCUAGGAAGCUCCGUAGUCACCGACGAGACCAGAAGUGGC  
>P6238  
AAUUGGGUAAGGAACAAUCAAAUUCAAUUCGGGAAGAAUUAU  
>P6239  
UGAACUGGAUUGAAGGUCGAAAAGGAAUAAAUUCUAUUA  
>P6240  
CCGCACACGGGCCUACACGCACACGCCGCCCGGUUCCUC  
>P6241  
CCCCGCGGUCAGUCUGAAAAAAAAGUCCCGCGCAGCCC  
>P6242  
CGCAGGGGCGCGAGCCGGCGAUCAGCCUCCCGGGCGACCGU  
>P6243  
CUAGGGAGGAGGAGGCGAGAAGAUGGCGGACGCCCCAGUG  
>P6244  
GAGCGGCGCUGCCUGUGGAGAUCCGCGGAGGCCGACAGGAU  
>P6245  
CCGGACCCGCGGGCGGGGACCAGCAGCGGUGAGUGGGGCCGC  
>P6246  
CGGGGACGGGGCGAGAGUGACGAUUCAACCCGGGGGAGC  
>P6247  
UCGCGCGCCAGGGCGCACCACCGGCCCGCCGGCUCGGAUG  
>P6248  
CUCCACGGGGAGGGCCUCUCAUCCACCACCCAGCCCACCU  
>P6249  
UUUUGCCAUGGUCGCCCCCAUCUCAGGUACCGUCUCAGAG  
>P6250  
GGACCCCGGAACACUCCGUACCGGGGCAGUUCAGGCCGG  
>P6251  
UUGGACCCCGAUAGGGGUGCAGCAUUAACUGCAUCUACAAC  
>P6252  
CGGCGGGGGCUGGAGGCGCGACCGCGGCCCGCCCGAGCGGG



>P6253  
AGCCCCGGACCUUCACCACGAAUCCCUCUCCACCUUCCGUG  
>P6254  
AGCGACUAAGGCGGCAGAGGAGCGGCGGCGUGGCGGCGCU  
>P6255  
CGCUCCAGGCCGCCUGAUGAGCCCGCCGCCGCCGCCGCC  
>P6256  
UCCCAUGCUCaucacUGAUGACCUCCCAAAACUGAGACAGA  
>P6257  
UCUAUGGAGAUCUCCCGCAGAGGACAGCACGAACAGUCCC  
>P6258  
AAUUUCUAGAAAAGAGUCUCAUCGUGGAAGGCAAGAGGGAA  
>P6259  
CGGGCCUUCUUCUUCACGGGAGUCUUCUCGGCAGGGGCCGG  
>P6260  
CAGUCACCUUCAUUGGCAAUAGCACAGCCAUCCAGGAGCUC  
>P6261  
CCGACCAAAGGGAAGCAAAAACAAGGGUGCUGCCAAGACCC  
>P6262  
CCACCUGUGCCUCACCACCACACUACACAGCACACCAGCC  
>P6263  
GGGGGGCAGGGAGGAGCAGGAGGGGGUUGGGAGCGGGCAG  
>P6264  
CGUCUGUAUACUGCAGCGCAGCCAUGGCAGAACCGCAGCC  
>P6265  
GGAAGAUAAAGAUGAUGAAGAAAACCCAAGAUCGAAGAUG  
>P6266  
AUUUUCUCUCUCAGGAGUUUAGAAAUGGUAUACCAAACAUG  
>P6267  
UUACCAAAAACAUCACCUCUAGCAUUACCAGUAUUAGAGGC  
>P6268  
CAGGGCCAACAGGGGCCUCCAGGAGAGGUGGGACCCCGAGG  
>P6269  
AGUUUAUCCAAGACCCAGGC AUACUUGAAGGAGCCCUUCC  
>P6270  
CCCUGGGUGGUCCACCUGCAAUUCGCGGAGCGGCGCCCCAG  
>P6271  
GGAGGUCCUGGAUCAGCAAGAGGCGUUCGAGGUGCGAGAGG  
>P6272  
GGUCGGGGACGGGUGACGAAAGAAGAGGGUGAGGGAAGGGG  
>P6273  
GCGGCGGGCGGGAGCGGCACGCUGGGCUCCGGGCUGCUC  
>P6274  
AGCCCGGGCGCCUGGAGUGAGGAGGACCGGGAGCUGGCUC  
>P6275  
AUUGGACAAGUAUAUGAAGA AUUCAGGUAACUAAAAUAAC  
>P6276  
UUGGAACAAAACUACCGAACAGUGCUGCUGAGAGACAUGCG

>P6277  
GGACGCUCCCAUCUCCACAACGUCACAAGAGCAGCGGAUA  
>P6278  
UUCAGAAGUGCCUCCUGCCCACGGCUCUGCUCUCCUCACGG  
>P6279  
CAGCAACAGCAGCAACGGGAACGCGAGCCUGGGGAGCUCCU  
>P6280  
GCGCGGGACGGCUGGUUCUCAGGGGACACGGAGCUGCGGCU  
>P6281  
AACUUUUUACAAUAUUGGCAUUCGAAGCUGCAGCCAUAACU  
>P6282  
GGACAGCGGCCCGGCACCCAGCGCCCCGCCGCCCGCAAGC  
>P6283  
GGCUCAGCCUUGAGUAAGUCAGCUUCACAUUCUCUCUGUUU  
>P6284  
AAGGCAAGAAGAUUUUUUAUUUGAAGUGUUCCAGUGCCAC  
>P6285  
CAGAAGCGCUACACGGCGGCAGGGGCGGGCAGGGGGCAC  
>P6286  
GCUGCUGCCUCCUGCCCACUAUGAAACCCUCCGGUACCUAA  
>P6287  
GGCGUUGGGGAGGUGGCGGAGGUGGAGGUGGUGGCGCACA  
>P6288  
GGAGGAGGUUGGGGUAGCGGAGCAGCUUCCGGGGAACCCC  
>P6289  
UCCUCCAACUCCUCCUGGGGAACCCAAGCCUGCAGCUCAU  
>P6290  
CCGGAACGGGCCAGCGCUGCAGAGGCCUACGUGCGGGUGG  
>P6291  
GGCGCGGGCCGGGGGCCGCCACGGCGAGGGGCCGGGCCAGG  
>P6292  
GCCUUCCACUGUCCUUUCCAGCUUUGCCUCCAGCCUAAAU  
>P6293  
CUAGAAGAUGGCGGACGGCGACAGCGGCAGCGAGCGCGGCG  
>P6294  
AACCAGAAUCUCUCCAAAGAUAUCCUCAAACAGAAUUUCA  
>P6295  
CCAACCACAGCCCCUGCACAGCUUCACACCCACCCUCCAG  
>P6296  
GGAGCCAUGGCCGGGGUGAAGCUGGCAGCAGAGGCCUGGG  
>P6297  
CCGUGCGCGUGCGCGAGAAGCGCGCGCACCCGCCCGCC  
>P6298  
UAAAUUUUGUGAAGAAAACAACAAAACAACUGGGAAGAA  
>P6299  
GGGAGGUGUUGGGCGCGGACAGUCGAGAUGUCAGAGAAAAA  
>P6300  
UGGGCGAGAAAGGGGAGCUGACUCUGGGGCUAGGCCGGCC

>P6301  
CAAGAGGCCCGGAGACCCGAAACUACUCGAGGACUCAACCG  
>P6302  
GGAAGUGGCGGAGCAUGUCAAGCACAGACUGGAACCACAGA  
>P6303  
CUAUGUGCCCCAGCUCUCAAAACGACACCUUGGCGGGGAGGC  
>P6304  
UUCCUAGGAUCACCAUUAACAAAGGACACCAAGGUACCCAAG  
>P6305  
ACUCCCUUUCACCAACACCGAACCCACAUGACACCUCCA  
>P6306  
AAGACGUUGUUGGGACCUGGAGUCGGGCCAGAGUCCGGCCU  
>P6307  
GGAGGGCGAGGAGGGCGCGAAGGACUGCAGCAGCUCCGCGG  
>P6308  
CCAUCAGCUCCUUGUGCUGGAAGGUGGACCAAGACCCCGCG  
>P6309  
AAAGCCUGUCAAAACAAGUCAAAAGGCUGGUGCCCCAGAAG  
>P6310  
CCUGGGGGAGAUCAUGGGGCAACCAGCUCAUGAGUCUGUCUA  
>P6311  
CCUGCCUUGCAGGCUGGAAGAGCAGACCCGGAGGCUGCAGA  
>P6312  
GCGCGCCGCGGGAGUCGGUGAAGGACGCGGUGAGGUGCCGG  
>P6313  
GGGGUGCCCCGGGCUGCAGAAAGCCUCGGCCGGGGGAGGAG  
>P6314  
GACCGGUGUGAGCGCUCAGCAUCUUCAGGACCCUGAUCGGG  
>P6315  
CGCCUCAGCACCACCCGGCAUUCUCUACAUGACUGAAAGU  
>P6316  
CACGCGCCCCUCAUCCAAAGAAAGACUCAGUCCUGCGCCC  
>P6317  
UUUCCAGCAGGAGCUUCACCAUGUUUGUGUGGCCGAUGCGA  
>P6318  
GGCCGUGGCGCCUCCGGGCCAGACGCGCUGCAGCCUCCAGC  
>P6319  
CGCCGCCCUACUCUCCCGCCAGCUUUCUACCCUCUAGCCU  
>P6320  
AGAUGCCGCAGACCCGCCUCAUCCACCUACGACGGCCCCC  
>P6321  
CGGCGGGCUGGCUGACCCCGAGGGACCCCAGCGCAGCGGG  
>P6322  
GUGCAGAGUGUCGAUAUCGCAAGCUUUAACAAGAUCUGAAG  
>P6323  
GGAGAAGCUGCUGUCGGCCGAGCGCGCCGUCACCGGCUACA  
>P6324  
UGGCGUCCGUGAGGGCUGUGACGGAGGCGGGGGCAGGUUCA

>P6325  
GUGUAGUCGGUCUGUAGGAAAGACCUUCUUUCCUCAGGGU  
>P6326  
ACCGGCUCUUGAGCGAGGGCAGCUCCCUGUCACCUUUUCAC  
>P6327  
UGCCGCCGCCGCGGGCCGGGAGCGGGUCGGAGCAGCAGGCG  
>P6328  
GAAUUUGGACUUGAUGAAGAAGAUGAAGAUGAGGAUGAGGA  
>P6329  
AGUCAGCUCCCACAGUCCGCACCCAGAGUCGGCUCCGAAUU  
>P6330  
UCACUCCCACUGCCUCGGCCAGGUCUGGAGGGAGGUCGUCU  
>P6331  
UAAAUGAUGGGGUUCAUGGCAGAGUUGAAUUCAGCAAGGAG  
>P6332  
GAUCUGUUUCUUUUGUAGGCAGAAUCCAGAGACCACAUUUG  
>P6333  
GGACCUAAGACCACAGGACAACGCAAGACACCCCGACAAGG  
>P6334  
GUAUACCUGAGGUGCACCGGAGGUGAAGUCGGUGCCACUUC  
>P6335  
UCCGCAGGCGUCGCGGGACGAGGAGAUCGGAGCCGGGAGAC  
>P6336  
CGGCGGGCGACAGGGGAGGCAGGCAAUGCUGUGGCAGAAGG  
>P6337  
AGAAAUCAAAAGCUUUGCGCGAGGCCACGACGCCUUCGCU  
>P6338  
AGCGAGGGGGAGGGAGAGCGAGCGAGCGCCGGGAGGAGGCG  
>P6339  
GAGAGCUUGGUGCACCGCAGACCUGCAGGGGGAAGGCGGGA  
>P6340  
AGCCGGAGGAGGCCGCGCGGACUCCGGGCUUUCGCGGUCG  
>P6341  
CAGCAGGGCGGACAGCAGGGAGGACAGCAGGGCGGGCAGGG  
>P6342  
CCGCCGCCGCCCAUCAUGAGGAAAUCGUGCACUUGCAG  
>P6343  
CCCUGUGCAGAACCUGCCGCAGCAUCCUAGAGCAGAGCGGG  
>P6344  
CCACCUCUCCUACUGUUCAAGUACAGGGGCCUGGUCCGCA  
>P6345  
GGGAGACUCACCACUAGAAGACGAUGAAGUCGGGUUUCAC  
>P6346  
CCAAUGCCCCCUACAGCGCAUCCGCUCCACGUCCACUCCC  
>P6347  
CGUCGCCGCUUGCUGUGCCCAGGCCGGAGCAGCAGCCGCC  
>P6348  
AGCACACUCAGGAAGAGGACAGCAGUGGCAGUAACGAGGAU

>P6349  
 GGACCGGUGGAUGGACGAGGAGCCUGUAACGUUAAAAAUGA  
 >P6350  
 UCAUGUCUCCUUUUUGGGUCACAUGCUGUGUCUUUUUGUC  
 >P6351  
 AGCAAAGAGGCAAAAGGGGCAGGGCAGAGGGAAGGGAAGAG  
 >P6352  
 UGUGGCCUUCCTGCCACUUGAACACUGCGACAGAACUGGAU  
 >P6353  
 CCAGUAGCAUCAGCAGCAGCAGCAGCAGCCGCCGCCGCCAC  
 >P6354  
 GGAGUCUAGUCGUCACUGUAGCUGCUGCUGGAACCUCCCC  
 >P6355  
 GAAGGAGAUGGUGUUUGGAACUUGUUGUAAGUAAGAUUUU  
 >P6356  
 GAAGACGGAAAAGGAAAUGGAGAAGAUGGAAAAGAGAAAGG  
 >P6357  
 CCUCCAGGUCUCUGGCCACCACCUGAACCGUGCCCACCUGC  
 >P6358  
 CGCCGCCGGCGCAGAGCAGCAGCGCCACAGCCCGCAGAGC  
 >P6359  
 GGAGCGAGAACCAAGGUCGGAGCUGAAGGGGGCACAGGAGC  
 >P6360  
 GCCUCCUCCUCUGCUCCGCCACCGGCUUCCUCCUCCUGAGC  
 >P6361  
 UCCCCUCUGGGUCCCACCCCAGAAGCCACGCACACCUCUU  
 >P6362  
 GCGCCCCCUGUCUGGCCUCAGCUCGCAAGCAGGCUGCACC  
 >P6363  
 AGCCCCGCCUCUCCCCUCACCCCCGGCCCAGGCCGCCCU  
 >P6364  
 AUCUUCAGUGGCUGCAACGAAAAGAGAGAGUCGGAACGGA  
 >P6365  
 UGGACGCGCCCCGAGCCCCACCGCGGCCCGCUCGCACGU  
 >P6366  
 GAGCGUGGUAGAGACAAACGAGGAAAGCGUCAGACUCGAGA

**II. Negative subset  $\mathbb{S}_{\xi=20}^-(m^1A)$**

>N1  
 UUUUCUCAUAAUAUGCAUAAACUUGGUCCUAACCCAGCCC  
 >N2  
 CGUCAUAUAGCUAUCUUCAGACUUGAAUGCUCACGCAUUG  
 >N3  
 AUUUACUGGAAUUAACAAAACUGAAAAAGAAAUUAAGACU  
 >N4  
 UUUGUGACGAAAGCUCAGAGACUGAAUGUUAUUCUUUAAU  
 >N5  
 GCCCAAUGUUACUACUUGGACUUGAGCUAUAUCUGCAGCC

>N6  
GACUUAUCAAUUUUUUAAAAACUUGUAGAAUUUUCUUUGUG  
>N7  
AUUCUACCAGACUCAAAGAACUAAUGCCAAUAUCCAACC  
>N8  
CUUAUACCAUGGCCUUAGGAAACUUAAGCAUACAUAGUUUC  
>N9  
AUGUUUUUAUCAAUACAGAGGACUCAGCUAAUUAUGUACCAG  
>N10  
UUAGCGCCUGAGCUUCCAAACUCCUAACACAAUGGCUCAU  
>N11  
AAUAACAUAAGCUCAUAGAACUUUGAUUAUGCUGUUCCA  
>N12  
AUUACUCUGGGCAAAAUCAAAACUGACUCUAAAGCCUGCAUG  
>N13  
AUUGUUGAUUAUGUUUUUAAACUGGCAUCUAGGCAUCUGAG  
>N14  
UGUAUUUCACCAGUCCUGGAACUGACUUUAGAAAACCAGC  
>N15  
CAUGUGAUUUUCUCUGGAAACUGUCUUUUUUUUUUUCUUG  
>N16  
UCUGCAGUGGUUUGGAUGAGACUGUCCCUCCGUGUCUCAGU  
>N17  
AUUACUUCGGGAGCUUGGAACUGGAGGAAAAACACGCUU  
>N18  
UGAGUUCUGUGGCAGCCAGGACUGCAUAGCAGAACUGUGUC  
>N19  
AUAAAAAAAAAAUCCCAAGAACUAAAUCUUUCUUAUAUCUU  
>N20  
UUAUAGAGGAGCGCAGCGAGACUAAUGAUUUGGUGUAGUA  
>N21  
GUAUAUACAGACUCUAGGAAACUAGAAAGGGACCCAUGUUG  
>N22  
CAGGUGACGAGCCAGUUAAAACUGCUGCCUCCUUUAUAAAG  
>N23  
UGCAGCUUUGGGUCAGCUGGACUGGCCCUUUCACAUGUCUC  
>N24  
CUCUUUAAUAUGAAAUGAGACUUUUCUGUGUGCUGUGCUG  
>N25  
CUCUGGUCUUAUACUUUAGAACUCCCACUAAAAGAAAUGA  
>N26  
UAAUGGUCCAUAGAAUUUGGACUAGAAGGAACGGUGCUAAG  
>N27  
CCCGCAACCCCCACGGAGAACUCCAUACACACCAGAGGAA  
>N28  
AAGAGAGAGAGAGAUGGGGAACUGGGGGAAAUGGCUGCUC  
>N29  
CAUCUUCGAGGCACCAUGGGACUCAAGUUGGGGCCAGCACU

>N30  
GCUGAGCUAGCAAGCAACGGACUGAUUUGAGCAGAUGUGUG  
>N31  
CUUUGGUGUGCCAGCCAUAGACUAUCACCACAGAGAGCACU  
>N32  
AGGGCAUCAGGUCCCCUGGAACUGGAGUUAUGGAUGGUUGU  
>N33  
UGAGGACCCAUGGAAUGGAGACUGACCUAGCAUCCUGUGUU  
>N34  
AUGCCUUUUUCCUGGGGAAGACUGUUUCUCCAGCUCGACCA  
>N35  
AUGGAGCAACAGGAAGCAAAACUGUAACAUGCAUGUAAGAA  
>N36  
CUGGUCAAAGGAACAGCAGGACUGCUCUUUCAGUUAACCC  
>N37  
AAGAGGGAUCCAGAACUUGAACUCUUAGGUUACAUGUAAAA  
>N38  
AGUAAAGGACGCCAUACAAAACUGAAGAGAAACUACAAACA  
>N39  
AUCUGAAGAAUUGUGUUAGAACUUUUUAUGGAAUUAUUUG  
>N40  
ACUCACAUCUUUGUAGAAAGACUAUUCUAUGUGAUGGUGAU  
>N41  
CUUUAGGAUCAAUUGC UAAAACUCAUUGUUCUUGC UAGUUA  
>N42  
UUUAAUCAACCAAUAUGUAAACUUACUUUAGCUGUCUCUAU  
>N43  
GUAGACUUAAGACAUUAUGGACUUUCCCCAUCCCGUGUAG  
>N44  
GUUCUGAACUGUAUGAGGAAACUUGCUGAGGAGCCAGGGUG  
>N45  
AUCAUAGUCUUACAUCUGGGACUGUAUCAGAUACAAUUUG  
>N46  
UCUUAGGAUAAGCUUGGCAAACUUAGGUAAAUGUGAACAAA  
>N47  
ACUAUAUAAGAGUAGAAGAAACUCUUAGAAUGCGUGUGAGC  
>N48  
GCAAACAAUGACCAGCAAAGACUGGUAAGGCAAACGAAUAC  
>N49  
CCUCCCUGAAGAAGAAUAGGACUUUCCAAGAAGUUAAGUG  
>N50  
UGAGGACCGGGGAUGUGGGAACUGAUUUCUGGUGGUUCCAC  
>N51  
UUAUGAGGUUCUGAGGUGGAACUCAGAAUCCCUGUUUACG  
>N52  
UGAUUGCAUAGAUGGAUAAGACUUUGAUUGAAAUACAACUG  
>N53  
AUAAAGAUGACUGAGCUCAGACUCUGCUGUCUUUCCAUCU

>N54  
GACCAUUAUGCUGAUCUGAAACUAAAGUUUGUUUUUGUUUG  
>N55  
CGACGGCCCCGAUGCCCAAGACUCUGAUUAUCAGGCUUACG  
>N56  
GUAUCUGAGAAUACAUGAAACUAAAUCACCAUGGUGAAUG  
>N57  
GUUAUCCAGACUGGCCUUGAACUUGAAAUCCAACAUCAACA  
>N58  
AUUAUAAAAGGACUUAAGAAACUAGACACCAACAAACCAA  
>N59  
UACUACCGUUUCAUUUUUAGACUCCAUUCAAUCAUAGGAAG  
>N60  
GCAACUGACGGAAACAGGAAACUGACGGAAACCCACAGCCA  
>N61  
UCAAAUUUACAAAGGUUGAGACUUUUUUAAAAAUAGAUUUA  
>N62  
UUUUACCCUUUUAAACUGAGAACUAAUUUAAGUAUAUAUUUU  
>N63  
GGGGGUGGAUCUUGACUUGGACUCUGAAGGGUGAUUGGCUG  
>N64  
GAAGUGUGUGAUCAGCAGAGACUUGACACCUACACCUACAC  
>N65  
AGCUAGAAGUACACAAUGAGACUAGACCAUAUGUGUGUGUA  
>N66  
GUCAGUUCAGACAGCCAGGACUGAAACUUGAGCUAUUUUCA  
>N67  
ACAUUUUACUGUUUCCUGAGACUCAAGGAGAUGAUUAUGUC  
>N68  
AUCCUCGACAGAUAAACUGGACUGUCCUCUACAGAAGGAAA  
>N69  
CUUUUAUGUAUUUUUUUGAGAACUGUCCUUUCAAUCCUUUG  
>N70  
AAGGAAGGCUUUAUACAGGAACUGAAAGUUGAUUGAAUUUC  
>N71  
UUCUACCAUCUGGGUCCCAAACUUGGCAUGAGUGCCUUAAC  
>N72  
UCCAGCACAAACUAUCUGAAACUCCAGUUCAGUGUAUCUG  
>N73  
CUGACAUUGACUGAUUUUGGACUAAUUCGUAGAAUUUGCAG  
>N74  
CUAAUUUUUAAUGGCUAUAGACUUCUUAUCUCUUUCCUGG  
>N75  
CUAAGGCGCUUUCAUCUUGGACUUGUCUCCAGAUAGACAU  
>N76  
GCUUCCAGGAAAUUCAGGAAACUCAAGCAGGAAGGGUAAAU  
>N77  
UUUUUAAAAGAAUUGUAGAAGACUUUGGGAUUUUGAAAAGUU



>N78  
CAAACGGGAGCUGAGAUGAAACUCAGUUGUGGAGUGCUUGC  
>N79  
ACACAUUUUUUUCACAGAAACUUACUUUAUAUAGACUUGG  
>N80  
UGUGGGGUACAGCAUAGCAGACUGACUGUGAGAUGGGUGUA  
>N81  
ACAGACCUCACGUGCGCGAGACUCUUGGUGCAAUCCAGAGU  
>N82  
CUCUAUAGCACUUUAUAAAAACUUAAGAAACAAACAGAAUA  
>N83  
UCCAGACUCUUGCAAUCAAACUAAAAAUGUAGUGCCUACU  
>N84  
CCUGUCUCGAAAAAAAAAAAAACUUAGUUGGUAAAUGUGAGA  
>N85  
UCUCUCAGGAUUUGUGAGAAACUGGUGCAGGCAGAGAAAGG  
>N86  
UGAAGGGAAGGAAAUGUAGGACUAAGUCUCAUCGCUUCCUA  
>N87  
GCUGUGGCCGUUGAGUAAGGACUGCACAGGCAAGCCGCGUU  
>N88  
AAGGGAGCCUGGAGGUUAAAACUUGGGGAAUUCUUUUUAAU  
>N89  
UGAGACCCUUAUGCCACAGGACUUCUUGACAUCUCGAG  
>N90  
CUCCCUUUCUUCUACCUUGGACUUUCCUCUCCCUCCUCCC  
>N91  
CGCAGACAGAGACUACAAAGACUCAGAUUCUCUUCAGCAG  
>N92  
GAAAAGACUCCAACCAGGAAACUAUUCUCUGCCCGGAGGGG  
>N93  
CAUUCUUUCCUCUGCAAGGGACUGCAGCCAGGCUGGUUCC  
>N94  
GAAAUUCGAUGGCUCCUGAGACUGUCCUCGAGCUCCUACAU  
>N95  
GCCAGGUUCACAUUAACCAAACUCGUAGCGCCAUGAGCACG  
>N96  
UGGAGCUUGCCCCUUUUUGAACUUCACAUGGGUUCAGGGA  
>N97  
CGCAACAUGGAGAGAACUAGACUUUUCUUAAGGAUAGCUUG  
>N98  
AAGUCAGGGGAGUUCAGGAAACUUUCCAGUCAACCUUCAG  
>N99  
UUGUAAAAGAAUCAAUCAAACUUUUGUUUACCCCAAAGGC  
>N100  
AGAUGUGGACAUGAACGAAAACUUGAACAUUGUUUCCUAAG  
>N101  
UUAUUGGGCACUAUAUCUAGACUUGUUUAAGAUUAAGACC

>N102  
CCUCCAUGUGGGUGCUGGGGACUGACCCUGCAUCCUCCACA  
>N103  
UUAGCUUUCUUUGGCUGGGGACUUGGCUUUCCCUCCCCUG  
>N104  
UGGAAAGCAUUGCUUCCAAACUCCUUUAUGAACACAAUUC  
>N105  
UGUUGAGGUUACAGACAGGAACUCCCAAGUCUGCCUUUUAC  
>N106  
CAAUGUGAAAAUUCUUCAGGACUUCCCUGUCAUUUUGAAGG  
>N107  
AGAAUUUCUUGUUCCAAAGACUUGUUUUUGUUUAAGUUA  
>N108  
CACGUGGGCAGGAGCAUUAACUUCCCCAGAGCUGGGUUAC  
>N109  
CUAAAUCACGCACGGAGUGAACUCCCCGGAGCAUGUGAUGC  
>N110  
CUGUCUCAUCCCCUAAACAGACUACAGAAUUCUGCUCUUC  
>N111  
UUCUACCUGAUUCUAAGAGGACUAAGUCUGUUAACAUCAC  
>N112  
UAAUUUAGUUGGUAGGAAAAACUUUUAGAAUGUUCACAAC  
>N113  
CAUGUGUGUAGUUAGUGAAGACUAGCGAAGCAGAGCAAACC  
>N114  
UAAAGGUUCCCGUAAAGCAGACUGUUAAGAAGGAUUCAACU  
>N115  
GGAGAGCUCUUUGGCAUGAAACUGCACAAGUGCAGGCCCGA  
>N116  
GACAUGGUGCUGGAGAAGAAACUGAGAGUUCUAGAUCUUGA  
>N117  
UCCCCCGAAACCAACCCAAACUUUCAGCAGCCUGAGUCU  
>N118  
CCACCAGCACUCCUCCUGAACUCUGCAUCUUGUAAAAGUG  
>N119  
UCCUGUUUCUGCUUCUUUGAACUUGCAAUGUAGCUCGACAC  
>N120  
UGGUGAGCCCUGGGGAUCAAAACUCAGGUCCUGCGGAAGAAU  
>N121  
UGAAUGAAAUGCAGGAGAAAACUCUAGCAGGAAGAGACACA  
>N122  
AUGUAAAGUCAGGUGUGAGGACUGCUUGCACUUUGAAUCAC  
>N123  
GAUAAACAUACAAGGUAGAGACUGGGCUUCCUGGUGCUGAG  
>N124  
CAGGGAAAGGGAGAGUUCAAACUGAAACAUAGUAACAUCAGG  
>N125  
UGGAGGGUUAUAUGGUAAAGACUUCUACUGACAUUUGGGGC

>N126  
AUAGCUAUUACAGACAGAGAACUUCCAGUAAUUUCCUCAAG  
>N127  
CAUGUUUAUACCAAGAGUCAGACUGAAGGAAAUAUCUGCACC  
>N128  
ACAAUGGUCUAAACAUUUGGACUGAAAGCCAGCCCCAAGUA  
>N129  
CCCUUUGUUUAAACACUUAGAACUGAAAAAGGAGAGAUUGA  
>N130  
CACACGAAAAGCCCAGAGGAACUGUGCGCUGAUGUAAGCGA  
>N131  
CGGAGGGUGAAGGUCUCCAGACUUUUUACUGCUUCUCCUUC  
>N132  
UGGGCUUUGAGGUUUCAAAAACUCAUGCCAGUCUGUCUGUC  
>N133  
UGUGGGGUUAAUUAAUAUGAACUUAUAUGAAUUAUGCCUU  
>N134  
CUUUACAGUAAUCAUGUAGGACUCUGAUUAGGGCCAAAUCA  
>N135  
AUAAGCUAAAGUCCUAAAAACUAUCAACAAAACUUUGCA  
>N136  
UGGGCGGUAGAGACAAGAGAACUUCUAAAAGCUGAUCGGCC  
>N137  
ACCAUUGUUGGGUAGUUGGACUACAAACUGUUAAGUUAUC  
>N138  
AAUAUUUAAAUAUUUUAAACUAAUAAUUAACUAAAU  
>N139  
UUCAGGCUAGCUGGCUCAGGACUUUUAGUUCUCCUGUCUCU  
>N140  
UUUCCACUGCUAGAGUUAAAACUUUUGAUUAAUACAACAUG  
>N141  
CCUGAGAAUUUUCAGGAGAACUUGGCUAGCCCGAGGGCCC  
>N142  
GUUCCCACCAAGUUGC UAAACUACUGGACUGACUUGGAAU  
>N143  
UUAUAUUGAACUGUGUUGAACUAGAUAGCCUUGGUUAUUA  
>N144  
GGCAAAAAGCCACCAAAGAACUCAAGAAGGUGGACUCCAG  
>N145  
CCACACUCCCACCCUUCAGGACUAUGAGCCCUAGUCCUGAG  
>N146  
AUUUUUUAUCAGAGAGUAGAACUGUUUGGGAAGGAUUAGGA  
>N147  
CUGAUUCAUUAUGGGUAUGAACUGAAAGAAUUUUAGUUUUU  
>N148  
GAUAUCCAGCAACAUUAAAAACUGGGCAUGGUAGUGCACAC  
>N149  
UAAGUCCUUUGCUGUUAGGAACUCACAGCUCUCUUGUCUUG

>N150  
AGCUCAGAGAUUAUAAAAAGAACUGUAGUAAAGGUGUCACAA  
>N151  
UGUUUUUAUUGCUGUGAAAAGACUGUAUGACUACAGCAACUC  
>N152  
AGGACUCACUGUUUGUCGAGACUGGCUGGCCAGCAAGACCU  
>N153  
UUUUGGAAACCUUGACGAAGACUUUAUGUGGCUAAUGAAAC  
>N154  
CGGAUCCCCAAUACCUGAGAACUUUGCAUGGAAAGACAUGG  
>N155  
UAAAAGACUAGAUACAGGAGACUGGAUAUGUAGUUAGCUUU  
>N156  
UUCACAUGAUGAAAGUCAGGACUUGCAGUGCUCACUCACCG  
>N157  
UAACAAUUUAUGCUGGAAAAACUCUAGGUAAGGACAACAUU  
>N158  
AAAUGAACGAGGAUGGGAAACUUAAAAACUUAAGUGGCAG  
>N159  
GGUGGGCUCUGAUCCCAGGACUCAGGAGGUUGAUCAGAGC  
>N160  
GGAAUCAGGUGAGAGUUGGACUUCCAGGGGUGCUGACAGA  
>N161  
AUGGUGUCAGAUACCAAGGAACUGGAUUUACAGAAGGUUGG  
>N162  
AUUUUAUCCCAACUCACAAACUUUUUUGAUUUCGUCCUCA  
>N163  
CUGAAAUGAUUCCUGGGAGGACUUUAGAAUAGAGUGCUGGC  
>N164  
AAUGACUGCUGAGGGAGAAGACUGAUCAGGGAAGUUGUAGA  
>N165  
UCUGAGCAAGAAUGAACAGGACUAAACCACUUGUAUGAAGA  
>N166  
UCUUUGAAAAGGGUACAGAAACUAGCAAUUUAUAGCUCAAG  
>N167  
UUAAGAGUUAGAAAUUGAAGACUAUGAAUACUAACAUUUAA  
>N168  
GGUGAGUGAAAGAAAUAUAAACUUGAGACCUGUGAUUCAUG  
>N169  
GGUGCCGACUGUGGACUUGGACUGAUGUUAGGACAGAAUUU  
>N170  
GGCGAGGCGCCACGUGGGAAACUGUGGCCCAGGGGGGAACA  
>N171  
UUCUAAAAAACUGGUGCAGACUUGGUGCUCUCCUCCCCAUG  
>N172  
UGUACAGGCUAUGAAUGAGAACUCAAUGCAAAGACAACAUC  
>N173  
UAAUUUGGAUGACACUCAGAACUGGCUCUGAUUGUGAUCUC

>N174  
UCCCUUCCGCUCGACUCGAGACUCGAGCCCCGGGCUACCUU  
>N175  
UGUUUUUAUCUGAUUUUAAGGAACUUAGAUUCCUUGCUCAUA  
>N176  
CUGCUGAUAGCUGAGGAUGAACUGUGGCUCGCCCAUUUAUA  
>N177  
CUUCUCCCAUUGUGGAAGAAACUCUCCUACUGGCUGCUUGC  
>N178  
AGGUGGUUACUGAGAAUUGAACUUAGGACCACUGGCAUAGC  
>N179  
GCAAUAGAGCAGUGACUAAAACUGUCUGGCUCAUGGAAACC  
>N180  
UUUGUUUUCUGUAUUUAUAAAACUGAUGUUCAUUUUGAGACA  
>N181  
CAUUUUAAAAUUUAGUAAAAACUGGUGGCACAAAUUAGUAA  
>N182  
GUAGAUUCCUUUGCAUUUGGACUAUAGAUUAACAGAAUUGA  
>N183  
CUAGAGGUCCUUGGUACUAAAACUGUCAAUCAAAGAAAACAC  
>N184  
CUUAUAUGUACGACCUAUAGACUAUCUGAGAUUAAAUCUA  
>N185  
AAGUACAGCCAGUCCUCAGAACUUUUUGUUUGCAAGGUUGU  
>N186  
UGUAGUCUCAAUUAUCUGGACUCCAGAGAUCUUUCAACA  
>N187  
UGUGAAGUUUGCAGUUUAAAACUAAUCAUCCUUCACAAACU  
>N188  
AUCACCAUGCCGGACCUAAAACUGAACUACAGAGCAAUUGU  
>N189  
GUGAGACUCCCAUGAAUAAAACUAAAUUUCAUUUACAAGC  
>N190  
UAGGAGACUAAGGCAAUAGACUUGUGAGCUCAAGCGCAGC  
>N191  
AAUUCCCGUACUCUAUAGAGACUAACCAUAAGUUCUGUGAC  
>N192  
ACCUACUAUGCAACCCAGAAACUCA AUGUGUUUAUUAUGUA  
>N193  
GUUUGGAAGAGCCUGAUAGGACUAUAAAAUCCUGGAAUAAU  
>N194  
GAAAAGUAAGUUCAAUGGAAACUGUAAAUGUUUAAAGAUAA  
>N195  
AUAAGGGAAUAGUUUUAAGAACUAUUGAGUUCUUAACUUCA  
>N196  
CAAAGAACUCAAGAAGUUAGACUUCAGAAA AUUGGGCAAU  
>N197  
UGUGGGUUCUGGGAAUUUGAACUUGAGACAUCAUGGUGUGU

>N198  
CAUAACAUUUCCCUUCUGAACUUAUUUACUCAUUAUUUAC  
>N199  
CCAUUUGAUGACUAACUAAAACUUCUCAACCUGUAGGACCU  
>N200  
GGGAAAAGGAAAUAUUCAGACUUUUCGGGGUCUGCUGGAU  
>N201  
AAUAAAGAUUUAAAAAAAAAACUGCCUGAUUAUUGAUACAGA  
>N202  
CUAGAGAAAGCACCCAAGGAACUAAAGGGAACUGCAACCCU  
>N203  
AAUCCUUAUUACUAACUUGGACUGAUUUUUUAAAAUUUAC  
>N204  
UAAUGUUGUUUCUAGAAGAAACUACUGAAGUCUGUGGUUUC  
>N205  
GGAUGACUACAGAAUGAUGAACUAUAUUUGUUUCACAGGAC  
>N206  
AUAAUUAGGUGCUCUAGAAACUGUCUUGAGAAUAACCCA  
>N207  
UGACUAAAUGAUUUCUCAAACUGAAUUAUCAUUAUUUGUA  
>N208  
CACACCAACCCACUCACAAAACUCUUGACCCAAAUUUGUC  
>N209  
GAUCAAGCUGAUUCAUGUGAACUGAACUGUAAUAUCCUGAC  
>N210  
CAGUCUCUGGCGCCUUUGGGACUGCCGCCACACCCGCUCCC  
>N211  
CUCUCUUGCUCUAUGGAUAGACUUUGUUAUCAUUUUCUUA  
>N212  
ACUUGGAGAGCUGGGGUUAAACUAUAGCCUCUCAUUCUCCU  
>N213  
CCUGAAUUCUAUCCCUUGGAACUCCCAUGGUAGAAGGAGAC  
>N214  
GUUAGAGCUAAAUGUGCAAACUGACCAAGAAGAAAAACA  
>N215  
GGGUUGUGUUUUAGGAGGAACUGAAGUAUUGCAUUAUUCA  
>N216  
AUUAGCUAACUUUAGAUAGGACUGUUCUUAUCUCAGUUGUA  
>N217  
UCCCCAAUUCAACCAUAGGACUUAGCAACUUCUGUCCACU  
>N218  
AUUCAUAUGUUAACUUAAGAACUAGCAAGAGCUUGUCUUA  
>N219  
CACACAGUUGAUACAGGAGGACUUCUUCUGAGGUCAGCUAU  
>N220  
UGUAAACAUGAUUUCUAGAAACUUAUUUUGGCUUGUAACUA  
>N221  
UCUCUGAAGGAAGACACCAGACUCAGACAGUAUGCAGCUUA

>N222  
AGUUUUAGAUAAUUGGGAUAAAACUUAGUCAUACAAAAACCU  
>N223  
GCUGCCAGGGCCUUGUGCAAACUAUGGACACUUUGAGGUUG  
>N224  
CACAGACUACUGCAUGUAAGACUCCUGACUCGUUCUCUUUC  
>N225  
CCGUGGGAGAACAACAACAAACUGGUACAUAUAAAAAUUA  
>N226  
CAUAAAGGGAACUAUCGUAGACUGUUUUGGUCUUCAACUGG  
>N227  
UCAUGUUCAUAGCACUGUGAACUUAUUUUAAACUCCCCUC  
>N228  
CUCUCACAGUCUUUCUGUGAACUUACAGCAGCCAACCAGGG  
>N229  
AUGUAAUUUCAAGUUCCAGACUGUAUGAAUGACUCUCACA  
>N230  
AAGGACCAAUAUGAAAGGAACUUUUUCUUCAUAUGUGAUA  
>N231  
CUUUAGAUUAUUCAUCGAAAACUCUAGUAUUUGGUUUUCA  
>N232  
CAUAAUUCAUAAGUGUAGAAACUUAGGUAUGCAGAUGCUCU  
>N233  
UUUAAGCUAGCUUCUGGGAAACUGUCUUGGUGAGUUUCUUC  
>N234  
AGUAUCAACUGAAUUCAUGGACUAUAUGGAGGGAAGGGAAG  
>N235  
ACACUGCCAUUUACACACAAACUCGAGGUCAUUUCCUUUG  
>N236  
GAGAAUCAAGUCACACUCAAAACUUCGGGAGGGGUUGUGUUU  
>N237  
GUGGUGAGCAGAAUAUCAGACUAAAACAGAGAAGACAGAG  
>N238  
UAAUUUCCUUCAUAUUAAGACUUUGAAAUUGAAAUCUUCA  
>N239  
GAUUUAUGAUAGGCACAUAACUGUGAAGGAAGAAACACUU  
>N240  
GAAGGAAGAAGGCUGAGUGAACUCCCAGUGGUGUUCUCAGA  
>N241  
CUGUCUGUAAAUGAUUCAAAACUGGUCCAUGAAGACCAGAA  
>N242  
GGAGGCUAGAAGCUUCCAGGACUAGCCUAGGUUAACAGACA  
>N243  
UUUCCAAAGUGUCUUGUCGAACUUUACAAUGAGAACCAGAA  
>N244  
UGGAGGGUACCAUGCAGGAAACUAGCAUCCUUUGGUUCUAC  
>N245  
UGUCUUUUUCUCUUGUAGAGACUGGAUUUCUUGUAGGAGGA

>N246  
CCCAUAAUCAACCUCCAAAGACUCUUGAAAUUUAAGGAUCU  
>N247  
UCCUCAGGCACAUGUCAGAACUAAAUCAUCUCUCUCUCU  
>N248  
GAUGGUGAGAGGGAAGCAAAACUGGUAGGAACUUGCUGAU  
>N249  
UUCUGUCCUAAAAGAUUCAACUUCUCCAGGGUCUUCUACCU  
>N250  
GGGUGCCACAUAUUAGGGAGACUCCCAGAAAGAGUCCUCU  
>N251  
AUAAGCUCUAAAGCCAUAAGACUGUCUCUGCUCAUCGGGGA  
>N252  
UCAGUGGGCUCGCAUCUGGGACUGAGCAGAGAGGGAGACUA  
>N253  
UCCUCUGAUACACAUAUGAACUCACAGACGCUGAGAGGGG  
>N254  
ACGUCCUCUCUAAACACCAGACUUGAUUUCAUUUCAAAGG  
>N255  
UCAGGAUACAAUUGAAAUGAACUGAAGGUGCAAUUGUUAAG  
>N256  
CAAAAACCAAACAAACCCAAACUUGUACUAUAUAAAUACUG  
>N257  
AGACAGAAUAUGAAAGAGAAACUCAAGUCCAGCUGUUGCA  
>N258  
UCAGUGUGUGGCCUCUGAGACUCGAGCCUUGAAAUUUUA  
>N259  
CUCUGCAAAAUGAACUUCAAACUUAACUAUUUCACAUGAUU  
>N260  
UCCUUUUGCUAGUCUGUUAACUCAACUUUUCUGAAGCCA  
>N261  
AGGUCACCACAACACAGGAAACUGAAUUAAGGGGCGCAGC  
>N262  
GGGUCCCACAACAUAGGGAACUGUAUUAAAAGGUUACAGU  
>N263  
CUAGUCAUUUGCCUAGAGGGACUGAUUGAGGGUUGACCCUG  
>N264  
AAAUUCUGGUGAGUUUGGAGACUCAGGGAUUUUCUUUAAC  
>N265  
UAGAACAUAAGACAAUGCAGAACUGGAUAAAUGACCUACUCU  
>N266  
CCAGCUACCGGACACUUUAGACUCGCCAUAGGCCUUGAAUG  
>N267  
CAAAGUCCCCGAGGGAGUAAACUUAUACUUAGGAAAGGUUA  
>N268  
CCCAUUAAAACCAUUGAAGAACUUUUAAAACAUCUGAAGA  
>N269  
AAAGUCAACUGUUUCACCAAACUAUAGUCCCAUUGGCUGU



>N270  
AGCCACUAAAUAGUUUAUAAAACUUGCUUAAAGAUUAUGAA  
>N271  
AUUCCAAUUGGGUGCUACAGACUUUUUGAGGUGCCCGGGAA  
>N272  
GCAACUAAAGUAGUUGGAGGACUUUUUUCCUGGACUCUUA  
>N273  
GGACCUUGGGGUGUCCGAAGACUCGGUGCCCAAGGUGUGUU  
>N274  
UAAAGACUAGGCCUCCUGGGACUAGCAACCAAACAUGGCAU  
>N275  
CUAGACAAUUUCUCAUGAAGACUCUUCACAGGUGAUUCUCG  
>N276  
CUUUGAAUUCAGUAGUUGAGACUUGUGAUCUUUCAGAGGAA  
>N277  
GUUCAAAACGGAGAAUAAAAACUAAAAACUGUGUUUCUUCU  
>N278  
GUAGCCACGAAUGACCUUGAACUUCUGUAGGACCAGUUUAA  
>N279  
AAAUAAACUACAAAAAAAAAACUUUUGGAGAUAAUAAUU  
>N280  
UCCAUCUUUGUACAAUAAACUCAAGGGUCACAGUUGUGU  
>N281  
GAACAGCAAUAAAAGAGGAACUGUGUGUUUAUUGUCCCU  
>N282  
AUGGCCAAUGAUGCCCUAGGACUGAGCAGCAACACCACAGC  
>N283  
AUUUGCAGUUCCCCCGAGGGACUGGUUAGUGAUCCAGCAA  
>N284  
GGCUUCAUCUACCAGAGGAAACUGGGGCUUCUGGAAAUAU  
>N285  
UCAGAAAAGCAGUGUUCAGACUGUCAGGUCUGCCUUGACA  
>N286  
CUCGCUACCCAAGCACGAGGACUUGAGUUCUGCCACCAUCA  
>N287  
ACAGAGGCCUUCUACGGGAGACUUAGGCAGUGGCUCUGAAG  
>N288  
CUUAUACUGGGGUUCUCAGGACUCCUUGGUUCUUUAUACA  
>N289  
ACUAACCAGCACAAUGC UAAACUGUACCAUUUUUAAACGA  
>N290  
UAUGAAGAGUCCCUAUUGGAACUCA AUGAAUGUGUUAGUUA  
>N291  
AAAAUCAUCUUCAGUGAAAACUUGGAAAUA CUUUGCCAC  
>N292  
UCAGAGUUACCUGGAUAGGAACUGCUCUGAAAUGCUGAGCC  
>N293  
UAUGGCAAGAGGAAGGCUGAACUUCAAGAGGGUUCAAGGAG

>N294  
GUCCCCAGUUCUGCUCCCAGACUCUAGCUUUCAAGAUCAGC  
>N295  
CUAACUUCUCAAUGAUAGACUACAAUGUGGAUGAGUAAG  
>N296  
CCAGAAAGAGAGCCUAAUGAACUCUAAUCUUUCUUGUAAAA  
>N297  
CAUGCAUAAGACCUGCUCAAACUCUAAACCAGACAAAAAUC  
>N298  
AUGUGAGAUUGUUAUACCAAACUAACACAUUCAUAAUAAGA  
>N299  
AUCCCUAGGGUGUAAUCAGGACUUCAAAUGUGUAAUUAUU  
>N300  
UCCAUUCCAUCCCUUACAAAACUAGCAUAACAAUAGCUCUG  
>N301  
UCAGGAUUUAGGGAUAGGGGACUUCUAGAAACAUGUCUU  
>N302  
AACGGUACCAAGCUGGGCAAACUCAGCACAGGCCAGGUGCC  
>N303  
UGGGGGUGGGGAGGGGGGACUUGCCUAAUUUCAUUAAGA  
>N304  
CCUGGUUCCCUUAGUAAUAAACUGUUACCUGGAAGUGUACG  
>N305  
AUGCCAACAAACUGAACGAAACUCAGCAAGUGCCAAUAGG  
>N306  
CACAGCUAGACAUCUGGAAACUCUCAGAGAUCAAUGGCCU  
>N307  
GUAAGGAUCAUAAGUUUGAAACUUUUAAAAAUCCAUCACU  
>N308  
AAAGGUAUCUGAAUUUGAAGACUUACAUAACAAGUUUUUUAU  
>N309  
CCCAGAAGCUAGGAAAGCAGACUUCUCCUACCCACGCG  
>N310  
CUCUGGGUCCUGGGGGUUGAACUCAGGUCAUCAGACUUGGA  
>N311  
AGAUUCUCUUCAGUUGUAGAACUGUGCCCUAGGGAUGCUGA  
>N312  
ACCAAUGUCUUAUUCUGAAAACUUGUAUAUGAAUAGAGAGG  
>N313  
AUGUAGGGUAGGAGAUACAAACUUUAAAGACUGGCAUACAU  
>N314  
AAGCCACCUCUCCUACGGAACUCCUGUCCCAUGACUGCC  
>N315  
UUUAACCCAAAUGAAACAAAACUAGGGCUGAUGCUCAGCC  
>N316  
GGUCAGCAGCAGUUUCCAGACUUUCUAGCUACUCCUCA  
>N317  
AUGUAAACAUGAGUCCAGGACUCCCUAAUCGCUAAUCUUC

>N318  
ACAAAACUGUAGUCAUUUGAACUCCAACACCUAUGUAACAA  
>N319  
CAGGACAACCUGGGAAAGAAACUAAGUGUGUUCUCCUGCUU  
>N320  
AAAUGCAAAGGAAAAGGGAAACUGAGGCCACUGAACCAUCA  
>N321  
UAGAUAGCUGAACUGUAAAAACUUGAUUACUCUAGCUAUU  
>N322  
UGGUGUCACCUGCAGAAAGGACUGGACUGCAGCAGAUGGUU  
>N323  
AGGCUGGGGCAUGACCUUGGACUGAGGGCCAAGGUCCCAU  
>N324  
AGAACUGUGAAAUGUCUAAAAACUAAAAUUCUAGUUGGUAAA  
>N325  
UGUUCAAAUAUCUACAUUAAACUUCUGCAUCCAACAAAAAU  
>N326  
AUUAGGUAGACUCAUUAAAAACUAAAUGACUCGGCUGAGGC  
>N327  
UCCAAUGAUUUUCCCAUCAAAACUAAUUGUCUGUGCAGAGCC  
>N328  
CAUGGGAUGGCAGCAAUGGACUCACAGACCACAUUUACAC  
>N329  
AUAUCUUUUGAGUUUCACAAACUUCAGGAUGCAGAUCUUGC  
>N330  
UGCCCAGGUCCCAGCACAAAACUACAAUCAUAUGAAAGCA  
>N331  
ACCAAUGUCUCUCUAAUUAACUUAAGACCUACUCAACAAG  
>N332  
GUACUAAACACAGUCAUAAAACUAAAGGAGCUAAAUGAAUA  
>N333  
AAAAAAAAAUUAGAAAGCAAACUAUUCCAGCAUAAAAUUC  
>N334  
AGCCAAAGGUAUGUAGUAAGACUCCGUUGGGUGGAGGGGG  
>N335  
AAAGUUCAAGACCAGUGUGAACUGCAUAGUAAUUUAAGGC  
>N336  
GGCUGUUAGAAUAUAGAGAAACUUUGUUGUUCUGUUUUGUU  
>N337  
UAUCACAGCUGUCUGUUUGGACUUGUUCAGCUACUGCCCA  
>N338  
UCUUCACCUAGGGUAAUCAGACUAAUUUAUAAGCAUGUUUG  
>N339  
CAGCUACUUUCCCCUUAUGAACUGCACUUCUCAUUCGGGCU  
>N340  
UGUAUAUACUUGAAUUUCAGACUUACGGCAAGUAUGUUAA  
>N341  
UGGCUGUCUAUCCAUUGGGGACUGUGUGGGUCUCAUCGAGG

>N342  
CAGUCAGGAACAACAUUAGGACUUGAGCAAGAACAUAACA  
>N343  
CUUAAGUCCAAAAAGGUAAACUUUGAAGAUUGUUUGUAUC  
>N344  
AGGGGAACUUGGUUCUGUAAACUGUCUUGGAAUAGUUAAGC  
>N345  
CUCCAAAACAUCCCCACUAAACUUGUUCUAGUACAAAUUCA  
>N346  
UUUACGAAUUCUGACUUGAACUUAUUGCUCACAGUCUUA  
>N347  
ACUUCACACUAAGUGAGGAAACUAGAAUGUGCCUCUCCCUU  
>N348  
UACCCAGGCCCAGAUCUAAGACUCUGAAUUGGCCACCCCA  
>N349  
GAAUAGAGGUCACACCAAGGACUAGCAAAGUAUAGAGGUUU  
>N350  
GUGCUGUGAGCAUCCUGUAGACUCGUCUUUUUAGUAUAAA  
>N351  
CAGAAACAUGUACGUGGGGAACUUAACAUCGGGUUGGCAAG  
>N352  
CGUGUGUGUGGAACCUGAGAACUAAGCCUUCUUUCCCCGG  
>N353  
GCUAAGUUGGAGAGAAUGAGACUAGAGUAAAGGAAUAUGA  
>N354  
AGUUUCAGGAACUUCUGAAACUUUUGAGUUGUUUUCUUC  
>N355  
GUAUCCUUGGCUGUCCUGGAACUAUUGACAUAAGACCAGGCU  
>N356  
ACCUGGCUAGACAUGGAAGAACUAGUGAUUUUACUUUGAA  
>N357  
UAGUGUAGGACAUUGGUGGAACUGGAGUUGUGAGACAGUUG  
>N358  
AAUAAGAACAACUCUGUAAAACUACAAAGAUACAAAAGAA  
>N359  
CUACAAAGAUACAAAAGAAACUGGAGCUAAUAUGUCAGUA  
>N360  
GGUAUUCAGCUGUGGCAGGGACUUACCUAACAUUCAUGUCU  
>N361  
AGGAGGAUUCUUAAACAGAACUAAUACAAACAUCUCUAC  
>N362  
AUAGUACCUCCAUAAGAAAAACUUCAUCUGCAAUAGAAGG  
>N363  
AAGAUGCAGGAUGCAAAGGACUGACCAGCCAUGGGGCUCA  
>N364  
UAACUCUACAACAUAUAUAAACUUUGCUGUGUAACUGUCUC  
>N365  
AUUUUUUUUCAUAUUAGAAACUUUAAAAGUAUUUAUUAGC

>N366  
AGGACCAAAGGAGAGAAAAGACUGUCCUGUGACAGCCACAG  
>N367  
CCUUUAAAUAUUCUGAUUAAAACUAGCCAGCAAGGCAAAGAA  
>N368  
GCUUUUGGUCACUGUGUUGGACUGAAUGAGAUGUCCCUCGU  
>N369  
GAAGCAGUGAAUGAGUGAAGACUCGGGGUCUCCAGGAAUCU  
>N370  
CAUACUCUUAAGAAAAUGGACUCCCUCCCAUCAGGAAUAA  
>N371  
GGGUAGUGGUUCCUCCUAGACUGAAACAUUCCAUCUCUCA  
>N372  
GAAGAUGGCUCGGUGGGUAAAACUGUUUGCUGUGUGGAUCAG  
>N373  
GAAGCAGAAACCAACUUGGAACUUUCUAGUACUGUCCCUUU  
>N374  
UGCACCAGACAAAAGAAGGAACUGGAGACAUGACAGUCAUC  
>N375  
AGUAGUAAAGGAAUCCUAAGACUUAUGUGUGAAAUUUUU  
>N376  
CUCUCCACGCUAGACAAAGAACUAGAGGCAACCAAGAAAUG  
>N377  
CUCUAGACUGAGUUAUGUAAAACUCCAAAAAGCAGGGGACAA  
>N378  
UUGUUGCACAAGUACAAAGAACUUGUGCAAUUCUCAAUUGU  
>N379  
UCUAAAGUUUUCUUCUGGAAACUAGGGAUUAUACUUGUCUC  
>N380  
GCUUCCAUUUCAUAAACAAAACUUGGUCCCUCUGACCGAUC  
>N381  
ACCAGGGCGAAGAGAGAGAAAACUGACAGAGUUGAUGUUUGA  
>N382  
UGAUAACGUCUGUUUAAUAAAACUGACUUAAGCAUGACAAGA  
>N383  
AGAGCUGUUCAAGGGAGGAGACUGCAAGCUCUGUAAUGUCU  
>N384  
GCAUCAAUAGACAGUCAGGAAACUAAAUAGCUUCCUGAGUG  
>N385  
UUAUCCAGGCUAGUCUCAGACUUGCUAUGUAGCCAAGGCU  
>N386  
AAGAGCAAUGAGGGAUCUAAAACUGCUGAGCCAUCUUUGCAG  
>N387  
GGUCCUGUGAAUAUUCAGGAACUGUAGUCAUCUGUCAUUGC  
>N388  
UCUUCAUGACAGUGUAAUGAACUCAGAUUGUGUGGUUUCCA  
>N389  
GGAUUAAACAACUUUUUAGAACUGAAUGGAAACAAAAGCAU

>N390  
CAAUACUGAACAAUAAAAGAACUGCUAGAGGUAUCACCAUC  
>N391  
ACUCAUUGGCACAGGAAAGGACUUUCUGGAUGGAACAGUUA  
>N392  
CCAGCCCUGACUAUCACCGGACUGUCUUGGAUCUGCCAGUU  
>N393  
ACUCCAGCCUAGCCUCACAGACUGCUCCAACUGGGCCUGUA  
>N394  
CUCUGUGAUUGUCACUUCAGACUCUGGGAACCCCAUGAGCC  
>N395  
GGUAUCUGCCCCUGAGCAAACUGAAACAGCACAAUUGGUG  
>N396  
CCCCGCCCCCUUACAGACUCCUGAUUGUUUAUCAGUA  
>N397  
AACUGAUUUUGUCUGUAUGAACUUCUAACUUAGACUACUCA  
>N398  
UUGGGAGAAGUUAGGGAAGGACUUUAAGUUUGCAGAAGAAC  
>N399  
CUGUCUGGCUUUGGCUUUAGACUGGUAAGCUAUGAUAUAUGA  
>N400  
GUAUGGGGGUUGUGGGAAAAACUCUGUUAUUAAGGUUGAA  
>N401  
AGGGUGUUUCUCAAGCCUGGACUAAUUUGAUAGAUCUUUUA  
>N402  
CUUAUCGAUUUCUCCCGGAAACUCACAUGAACCCAGAAGUU  
>N403  
UCCUUUGUUUCUUUAAAAAACUGUAAUUUAAAGCCGGGCG  
>N404  
ACACAUACAUAACAACUACAAACUAAAAUGCACAAUCAGGAA  
>N405  
CAUGAUCACUGUGUCUAAGGACUUACCAGGAUGACCAAGAU  
>N406  
GCCUGUAACAACACUGUGGACUGGAGACUAAUACUUAUA  
>N407  
AUUAAGAAUAUCCCUACAGACUUGCCUACAGCUUUGUCUU  
>N408  
GUGACUAUUAAAUUUCAAACUGUCUCACCAGUUGAAGAG  
>N409  
AAACUUCAGGUCUUUAAAAAACUCCUGUAAGGGCUGGUGAG  
>N410  
GCCACCCACCCCUCUUCGAACUCACACAAUAUGUACUCAC  
>N411  
GGCUGCUAUUUACUCUCUGGACUUCUCUGUUACACAGCUCC  
>N412  
AAAAAUUUAAAAAUAAAAACUGGGUAAAAGCAAUUUUA  
>N413  
CCAGUGCUGAGCCAUGUUAAACUCUCGGUCAUGCUUAUAUGA

>N414  
AUAUGUCUAGUCUUACACAGACUCCUUGAUUUACAGCUUUG  
>N415  
AGCAACGGUGAGCACUGGGGACUGUGGGUCUGGGACUCCUA  
>N416  
ACAAGUGGUGCCACAGGCAGACUGGUUCUGUCUCUAAGUAG  
>N417  
GUCAUCACCUUGUGCUCAGAACUUGGCCACUUGCUCUCUUC  
>N418  
UUGUGCUCUUUGGUGGUAAACUGACCCUUUCCAGGUUGC  
>N419  
CCAGGUGUAACUCCAGAGGGACUUCAGAUGC UAAACUGCC  
>N420  
ACAGAAGCUGCAUUCAGAGAACUUGUGGGUUAUGAAGAGCU  
>N421  
GGAACAAGAGAGAUAUCAAGACUUUUGACCCAACUUAUUAG  
>N422  
CAGCAAGGUUAAUAGACUGGACUGUGAAUCUACAUAGCCUG  
>N423  
UUUAAUUUAAUCACAUCAAACUUUAUUAUACACUGUAUGA  
>N424  
GGAAAAGCAAACAGAAAAAACUGGAAAAGGUUAGGAAGU  
>N425  
GGACUUGUAGUGACCUAUGAACUUCAGGCAUCUCCCAAACC  
>N426  
UGUUGGGCCUUUGGAAGAGAACUAUGGUCACUUAACCUCUA  
>N427  
CGUCAGAACCAUUAUCCAGGACUGAAUACUUAUUGAGACUUA  
>N428  
UUACCAUGUAACUAAGGAGGACUUUGAAUACUUGAUCCUUC  
>N429  
UGACACUGACCUAAAAACAAACUCAUAGGUUGGUGAAUAG  
>N430  
CAUCAUAACUAGGUGGUAGAACUCCAUGGGUGAAGAUACCA  
>N431  
GAAGCAGUUGGAGGGAGCAGACUUGUGAGGGAUUGGAGAGA  
>N432  
CUUACUUAUUACUUCUAAGACUCUGGUUGCAGGAAUGUAU  
>N433  
AGUCGCUGCGUUCAGGAAAGACUUCCUAUCCUAAUGAAUGG  
>N434  
GAGAGAAACAACUUCUGCAAACUGUCUUCUGACCUUCACAU  
>N435  
AUCUCAUCUCACUGUAAGACUCCCUCUGAUUAGUAAUUAU  
>N436  
CUAGGAGAUUAUGACCCCAAACUCAGUUUCAGCUCAAUGAA  
>N437  
GACCCUCCACUAAGCAGAGACUCCAGGUGAGCUGUGAUCA

>N438  
GAAGAUGAAGGGAAAAGUAGACUCUUACAUAGUAUCGGUGG  
>N439  
GCAACAAAAGAAGCACUAAGACUGUUGUCUGAGACAGUGUU  
>N440  
UCCCUUAAGGAUGGACCAAAACUAGGAAUUGUAAGUCAAAU  
>N441  
AGAGUUACAGGCUGUUGUGAACUUCUCAACAUGGGUGCUGG  
>N442  
UUUCAAAACUUUCUGUGCAAAACUCAAAUAAAAUAAUUACGG  
>N443  
ACCUAAGAAUUCUAAGGUGAACUAAACCCUUCCUCCCAA  
>N444  
CUAAACCCUUCCUCCCAAACUGCUUUUGUUCAGGUGUCU  
>N445  
UAAUUAACACACCUGGUAAAACUCAAGUGGCCACAUUCUUU  
>N446  
AUUGUAUCUCCAGUUUAUGGACUUAGCAUUGUUUAGUCUC  
>N447  
UAUUUCUCAAGUUAACAAGACUCCUUUAAAGAAGUAGAG  
>N448  
CUUGGUGCUUUGCUGGGAGAACUCCAUGAUGCCUCUCCUUU  
>N449  
UGCUCUUGGAUGUCUACUAAACUUGAUGAUAGACUAUUUC  
>N450  
ACUCGUGUAAAUCCCUGGAACUGGAGUUAGAGAUAGUUGU  
>N451  
UCUAAGGUAGUUAGAAGCAAACUCACUCGGUUAAGAUAAAC  
>N452  
CUGCACCCUGAAGAGUAAAGACUCUUCCCCAUACUGUCUCA  
>N453  
ACAUACAAGCUUAUUGGGAAACUACUCUCAGGCAGGCGAGC  
>N454  
UUUAAAUACUUGAGACAGAGACUUUCACUGAAUCUGGAGUU  
>N455  
UGCAUACUUGCAUCCUUGGAACUGACGCAGUGCAUACUUGC  
>N456  
AUCUGUAUGAGUGCACAUAACUAUACAAAACAUGGGUUU  
>N457  
ACUUUAUGUAAGCUGCUUAGACUCCAAUAUCAGGAUUUGAA  
>N458  
GAUCUAACUGGGAGUUGCAAACUAGAGUUCUACUAUGUCCU  
>N459  
AAAUCCUGCAACUCAGAAAACUUCCAAAGUGGGUGCACUA  
>N460  
GGGAGCUGUAUGACCGAAGGACUUGCAAUCAGCACUUCUAU  
>N461  
GACAUUUGCAUGGGCACUGGACUGUGACAGUGCUGGGCUGA



>N462  
GCAGCAAAAAAAAAACUUUCAAAACUAAGGACAUGGUUCACUGG  
>N463  
ACAGAUGAAGAAACAGAGAGACUGGAAGUGAGGUAGCUUCC  
>N464  
CACAGUGAGUACCAGGAAGGACUAUGCUUGAGUGGAUGCUG  
>N465  
CUUGAUACACGUUCCUCCAGACUUUAGGUAACUGUUUGUUU  
>N466  
UCCUUAGUAAUUCACGAGAACUCUCUGUAUAGUGAGCCUA  
>N467  
GAGUUUACAGCCAGUGAGAGACUCUGACAAAGAAGAAGGUU  
>N468  
UAAAAGUUUCCCAAGAAAAACUAGAGGAAACUAAUUGUUA  
>N469  
AACUUGUAGAAUGAAAUUGGACUAGGAGUUAGCACGGUUUU  
>N470  
GGAGUCACUGUACCACCGGACUCAUCACAGGAAGACUGGC  
>N471  
CAUUGUGAGGCAGAGACAGGACUCAGUGACUCUAGGUUAUA  
>N472  
CAUAGUCAGUGCACCCUGAAACUCACUGCUUAGGCUAGAAU  
>N473  
UCCUGAGUGUAUGUGGGCAAACUUCUACUCAAACAGAUAGG  
>N474  
UCUGUUUUUCUGAUUUGAAAACUGAGUCUUGUGAAUCUAAA  
>N475  
CAUUGCACUUUUGUGAUCAAACUCACAUCCACACAUUCACA  
>N476  
AAAAUCAUAAGAAACGUAAACUCGUGAAGUUAAGGCAUUC  
>N477  
UGUCUUUCAGAUACAACAGGACUGAUGCAUUAUUAAAUUCA  
>N478  
UGGGGAGGUUUAUUGUGAAACUUAGCAACACAUCAUAGCC  
>N479  
AUUAAAUGAGGCAUUCUAAACUGACCAAAAUAACAGAUUA  
>N480  
CAAUUUUAGCAGAUUUGUGGACUCAAGGAAAUUUGAAAUUU  
>N481  
CUCAUACCUGUAAAACGAGAACUUAGGCCAAUGUUAAAUCA  
>N482  
AAGAAGAGUUCUACCUCAAGACUCAGUUUAUACUACUCCUGG  
>N483  
CAGUUUUUCUCAAACAGAAAACUGCAAAACAUUGCCUGGGG  
>N484  
UAGAUUAUAGAUAAUGUCCAAACUCCAGCCUGCACAUCUAU  
>N485  
AGAAUAUUUUAUCAAGUGAACUUUUAAAAAAUGUGUAGUA

>N486  
GGUUAGAGGGAGUAAAAGGAACUGGGGAAUAAUGAAAGUAU  
>N487  
GUAGAGAGCAAUUGAAGAAGACUUACGGCAUCAACCCUCAU  
>N488  
AGUGCACAAUACAUUUAAAAACUUCAAUUACAUAAUUUGU  
>N489  
AACAAUUUAUCAUUUAACAAACUCAGAGAACAAUUCUAGGU  
>N490  
UCUAGUGAGGAAAGAAACAGACUUAGAGUUUAAGGGCUGUG  
>N491  
GCUCAUCAAUCACUGCAGGACUAGGCACAUCCUCUCCCAC  
>N492  
UCUAUCCUCCACAUGCAUAGACUAGUAUAUCUGUGAGUAGA  
>N493  
AUGAUCUUGUUAUUGUAGAGACUUCUUGGCAGUAGAAGACU  
>N494  
UAAAAAAGGAACAUGUGGAACUUGAGACAAGAAGAAGGUU  
>N495  
UUUUUCUUUUGCAGAGGUGAACUAAAUAUUUAUCAAGUAU  
>N496  
UCCCCUAGCUGAAUGAAAAACUUCUGCUAUGCCUUUCUA  
>N497  
CAGAGCACAUGGGGUGGAGAACUACCCUUGGCACAUGCGCA  
>N498  
UCACUGUAUAUAUAGCAGGAACUUGGACUGAGUACUGUCUC  
>N499  
AGUUUCUUGACAAGUUACAGACUUUCAAGUCGCUAGAGUGG  
>N500  
CCCAUGGUCCAGAAAAGGACUAAACUCAGGAAUAACAGU  
>N501  
GCUUAUUUCACUUAGUGUAAACUCCUCAAGGUCUACCCAUG  
>N502  
AGAACCUCUGCAAUGAAGAAACUCCAUCUAUUUGAAGAUUA  
>N503  
AUUUGGUAUUCUAGCAGAAACUGGGAAUUAAGCAUAUACA  
>N504  
UGCAAUGAAGUUACAUAAGGACUUAUCUAAUGGCUAGUUGU  
>N505  
GGCUUAUCCAAGCCCUAAGACUAAACACAGCACUGAACUC  
>N506  
UCAUGGCACCAUGCAGGCAGACUUGGUGCUGGAGGAGCAGG  
>N507  
GACACCGCAGAAGGUAAGGAACUCUGGGAAGUAGAAUCAAG  
>N508  
UCCAACUUUCACUGAGAGGACUAUGUCUGCCUUUCUCUAC  
>N509  
UUAUGCAAGCGUUAUCUAGAACUCAGAGAUGUUGUAAAUA

>N510  
UAAUGUGAGAUUGGUUUAAAACUAGCUGGAGCCUAAGAAAU  
>N511  
AACCCAAGGGAAGGGGUGAGACUCCAAACUUCAGGCCACAA  
>N512  
AAUCUGUUUUAGUCAGUAGAACUGAGACCAGUGGGUUACCU  
>N513  
CUAGAUACAUAAGGUAUGAGACUUCCCACAAGGCUUAUCUC  
>N514  
AGGAUGAAAGAGGAAAGGAAACUGGGCUAGAAGGCAGAUCU  
>N515  
CUGCAACUAAUAGAAAAGAAACUGCAGAAGAGCUUCGAGGA  
>N516  
UUAAAUGAAUGGCUUAGAAAACUUAUUGUCCAGCAUCUCU  
>N517  
GGAUGAACUGUGGCCUAGACUUAAGUCCCCAUCCACCAA  
>N518  
GCACAGGGGAGGGAGCAGAGACUGAGGGGAUGGCCAACCAA  
>N519  
UUUGUAGGCAGAUGGAUGGAACUAAAAUGAUCAUCCAGAG  
>N520  
ACCAUGGUAGCUUAAAGAGACUGAACAACCAGAAAGCAUG  
>N521  
CAGCUAAGUCUUUAUGUGGGACUCCUUUCAGCAGGAAUAGA  
>N522  
GGGAGGCCUCCUUUUCGAAACUUUUCUGAGGAGAAAGAGU  
>N523  
GAAGGAAGGUGAAAAACAAAACUGCCAAUGGCCAGAAGCAA  
>N524  
UCUAUCCCUUAUUUGGCAGACUGAAGCUGACUACCAAGAU  
>N525  
AAAAAAAAAUUCAGGGACAAGACUGUGGAAAUGUGUACUCA  
>N526  
AAUUCAGGGUGUAAGGAGAGACUGACCUGCUUGAAAACAA  
>N527  
CCUCCCCUAAAACCCAGAAAACUCCACAGAACAGGAGGCAU  
>N528  
UCUUAUUGACUUAGUUUAAAACUCAGUCCAAUACUACUAAU  
>N529  
UUCACCCAAUCUGUUCACAGACUGAGUAGAACAGGAAGAUC  
>N530  
UGUUUCUCCAGAGAACCAGACUGGAAACAAAAGGGUUCUA  
>N531  
GCAGGAACCUAGAGACAGGAACUGAUAACAGGGGUUAUAGA  
>N532  
ACUGAGCCUCCAUUUUCUAAAACUGUAAAAUAAUGAUAAAAU  
>N533  
AAGGACAAUAUUUAAUUGGGACUGGCUUACAGGUUCCGAGG

>N534  
CCGUGAAGUAAUUCUCCAGACUGUUAGAUAGACCACAUG  
>N535  
UGUCUCACAGCAUCUAAGAAACUACAGAUGCCAAACUAGAC  
>N536  
UAGAUUUCAUUAUUAGCAGAACUAGCUUCACUGAUUUAGAA  
>N537  
ACCACAGAAAUAUACACGGGACUCUACCCACUGCCUUGCUA  
>N538  
AAUCUAUUACUCAAUUUAAACUCUUUCUCAUUAACCAAGAA  
>N539  
CAAGGUAGACAGUAGUUUAAACUCAUUGAACAGAACCUUGC  
>N540  
CAAGGCUUCACAUUCACAAAACUUCUACAGAAGGAGUUGC  
>N541  
AUGAAAGUAACAAAUAUAAACUUACCUCACUCAGGAUGAU  
>N542  
GAAUUUCAGAAUAAGGAUGGACUGCCUGGAAUUUGGAGCAG  
>N543  
AAAUGUAGAUUAAAACGUAAACUAAAAUCCAUGAAAGGAG  
>N544  
CUAAAAUCCAUGAAAGGAGACUAGCAUUGCCUCUGUGGCC  
>N545  
CCAUGUCCAUUUAGCAGAAAACUAGUAGUGUGUUCUCCUA  
>N546  
AAGCUCGAUAGCACUGAGAGACUCAGCAGAUUUCUAGUACC  
>N547  
UCUAAAUGGAAGCUUAGAAGACUAGGACUGACCUCUGGGUA  
>N548  
GGGAGGGGGAGGGAAGAGAGACUGCAGGGAGAAAUCAGGGA  
>N549  
AAAGCCCCUUUAUGAAAGGACUUUGUAGUGGGAAGACAGG  
>N550  
ACCCAAUUAUUAAACAGAACUUUAGACAUUCACCGCUUA  
>N551  
UCUGGUAUACAGACUGCAAAACUCAGUGUAGUCAGUAGAUG  
>N552  
CAAUUUUCUGUCCUAUGUGGACUGGCUACACAGUACUUGAU  
>N553  
CCCCACAACAGCACUGUGAACUGCUUCCACCUUCACUGUG  
>N554  
GGACAACCUGGAGACAUCAGACUCAUCCACGUGUUAUCCC  
>N555  
CUGAGUUUCCACACCAGGAACUGACCACAUACUGAUACAC  
>N556  
AGAGCCUUGGGUGAGGUAAAACUAUAGUUAGAAUAUAAUUAU  
>N557  
UGAUUUUAAAUGAAAGAAAACUAAUCUGUCCACAGAAAUG

>N558  
GGGAAUUGGGUGAGACGGGGACUCCUGAGGAUGGCAGCCAG  
>N559  
UUAAGAGUGUGUUUUUCUGAACUUGAAAUUGGUCCAUAAAA  
>N560  
AAGAUACAAGCAGAGCAAAAACUCCACAACAGCAUGAAGUC  
>N561  
ACAUUGGAGCCUAAAUCAGACUGGACCUGAGCGCCAGCCC  
>N562  
AAGACAGAAAUUGGUACCAGACUCCUGGAACAUUUCUGUAA  
>N563  
AUUCCUUUAUUUAUGUCAAAAACUCUGAAUGCAUUGGGAGAG  
>N564  
UAUCAAUUAAAAUGACAGGGACUUACCUAGACAGUUACCCG  
>N565  
AGUUUGAGAACCAACAUUGAACUUUUAGGUUAUAUCUGAUU  
>N566  
AGGUUCCUGAAUCCUCUAAAACUCGUUCUCUUUACCUAACC  
>N567  
UAUCCUUAUUCAGAUAGGGGACUGAUUCCAGUAUAUAUAA  
>N568  
ACAUAGCUUCGAUGCCUGAAACUCUCUCUUUUUAUCUCGUGU  
>N569  
GCAGAAACCUGGAGGCAAGAACUAAAGCAGAGAAAUAAAAG  
>N570  
AGCUUAUGCCAAAGCUAUAAAACUGUGGUGCAGAUGCCUGAG  
>N571  
GUCAAUUGUACCUCCAAGAAACUGCCAGUGCUCGUUGGAUG  
>N572  
GAACUUCUGGGAUCUUUGAACUUGUAUUCUGUAUGUUUGU  
>N573  
AAGACGAGUGCAGCAAUGAACUAUGUUGGUUCCAGCAGUG  
>N574  
UGUGUUCAUGGUAAGAGCAGACUGCCCACAGUUUAUUGUAA  
>N575  
AAGUUUAAAAAACAAUCAAACUGCAUGGCUCUGGAACUCC  
>N576  
CAUUUUUUUAUAAUAGCAUAAAACUUUAAAAGUUUUUUUUUU  
>N577  
UUUUGAAAAGUAUGAUUAAAACUUGUAUAUAUCCAUGUGUA  
>N578  
AACUUGAUGAAGUAAUUGAGACUGUUUAUAUGUCUGAAUGA  
>N579  
AAAGUAAAUAGAUACACAGACUUACUAUAUUUAUACUCUGU  
>N580  
AAAUUAUCCAUUUUUCAAAGACUAAUAGUUUGUGUUGAGUU  
>N581  
AGAAAAAUUACUCUUGAAAACUUAUUAGAAUAGAGAAU

>N582  
UGCACAGUGGGAAAUUUCAAACUACUGGUUAUAGUUGCACCA  
>N583  
AUGAAAGGAGGAGCAUAAAAACUACAGGACAAGAACCUUAA  
>N584  
CUAGAGGCAUCCCCUACAGGACUUCUGGUGUCAGGGGCUAA  
>N585  
AGUCUUCCCAACAUAUCAUAAACUAGAGUCUGAGGUGUGAGU  
>N586  
CGAAUGCUUUGGGAGAGCAAACUCUUCUCCCAGGUUAUAGCC  
>N587  
UUUGGUUUGAGAAAGAAGAAACUAGGAGAUUCUUGUAAUAGG  
>N588  
AAAACUUAGAUGUGUCUAGGACUAAAAGCUUGUAAUUAUUA  
>N589  
AGCCUGGGGGUGAGACUGAGACUCUGGUACAUGACAGUGAU  
>N590  
UCCAGGAACUAGGAAAUGAACUUUUCUCUCCCAGGGAAAG  
>N591  
GUCAUGCAAACCCACCCAAACUGGGCUUUCUGAGUCUCAU  
>N592  
UUAUGGAUCAACAAAUAUAAACUGAUACUAUAUGAUUAUUC  
>N593  
GUUUUGGAAUAAGUUGCAAACUAAGGUGGGUUUGGGGGGG  
>N594  
CUUUUGAAUAAAAGCCGAAAACUAUCCCCUAAGAGGUAAGU  
>N595  
UGAGUUUGAUGUUAGCCUAGACUACAUGAGACCCAAUCCA  
>N596  
CUCUAAAUCUGUCAAUAGAGACUUAUUGUCCUCCACCCCGC  
>N597  
UAAGUGUUCAAAUCUGCGAGACUAUGGGGAACAUUUCUCAU  
>N598  
CGUGAUAACUGCAUCACAGACUAGCACUGACUAGAACUGA  
>N599  
UCCUGUCCACAGUAACACAGACUGUAGUGCAUGGUGACCUG  
>N600  
CAAUCAUGAACAGUACAAGAACUGCUGGGGAUCCUGCUGUA  
>N601  
CUGUGCUUCUUGUAGGCAGGACUAAUCUUGGAAUGAAGGUU  
>N602  
UCCAUCAUUUGCCUGCAAACUUCAUGAUGCACUGUAUUU  
>N603  
UACAAGAGACAACGUCUUGAACUGGGCACUAAUAGCCCGGG  
>N604  
CAAGUUACUAUGCGACCUGAACUACCCAUCAUGAGCUGGGU  
>N605  
GCUAAAACCACCAUUCAGGGACUGACAGAAUGCCUCAUCUA

>N606  
AAAAAAUUCUGGCUACUUGAACUGUAUCUCCAUUCUGUCCC  
>N607  
GGUGGAGAGAGGGGGUCCGGACUGGGGAAUCAAGUCAACU  
>N608  
AUUUGACCCUGUUUGCCUAGACUUUACUGUUUGGCUUUGGU  
>N609  
CACCUGAUUUGGUGGCCGAAACUUCGCUCAUUGUUGUGACU  
>N610  
AUGGGAAUGUCCACACUAAACUACUCUGAGAACUGGUGAA  
>N611  
CUACUCUGAGAACUGGUGAAACUAACUUAAGGUUUUAAAC  
>N612  
UGCUUCAAGCCUUGGUGAAACUGCUUGCGGCUUGGCCAGA  
>N613  
AUGUGGAUGCUGCGGACGGAAACUCUGGUCCCCCUGCCUGUC  
>N614  
UUAGAGUUUUCUUUUUAAAAACUUUUUAAAAUCUAAAUG  
>N615  
UAAAGAAGACAAGGAAAAAGACUAUGAAAUGAAACAGCCAA  
>N616  
AUUACCCAAACCAGCCUGGAAACUGAAACCUAUCUAAGCAA  
>N617  
ACAAAGGAACAAAUGUGUAGACUUCAAUGC UAAUAAAGUU  
>N618  
UUGGGAGCAGAAGUAGGUAGACUUCUGGGAAUUUGAGGACA  
>N619  
GGAAUGCUGUGGACAUAGGACUGUUUCUUGAUAAUCUGUC  
>N620  
GACUCUGACUCCAGGUUAGACUUUCAAGGCUUGAAAGCA  
>N621  
GCUGGAGUUAGAGGCUACAGACUUAAGGAUAAGUGCUUAAAC  
>N622  
UUCAGAGAACAGAAUGAAAAACUCACAGCAGAAAAGCAAGC  
>N623  
AUAACAAAUGAAAGACAAAAACUACAGCACUUCUAGAAAUU  
>N624  
AUAAUUAACAAAAAGAAAAACUAACUAGAGAACUGGAAGG  
>N625  
AGAGACCUGGGAAAUAGGAGACUCUCAGGACUCAAGGGAG  
>N626  
AUGAUAAAAAUACUGUUUAAACUAUUUUUGAUAAAAUAAC  
>N627  
CCCUGACAACAGUCGCCAAGACUGACCGCCUGAGUCUGAUC  
>N628  
AUAGACUAGGCUAGUCACAAACUCAGAGAUUACUCUGCCUC  
>N629  
CAGGAGAUUUUUUUUGAAAAACUCAAGAGUUAUUUUAGACA

>N630  
CCACUCUACUACCCUCUGGAACUUUGAACUCCAAAUUAAA  
>N631  
GUGACUUCUGUAUCCCAAGGACUGGUAAAGAAACUAAGGGA  
>N632  
GCAAUAUCUCCAUGUUGGAACUUUGAAGUAUUAGUAAUUG  
>N633  
AUCUUGUCUGUCUGAAUUAAACUAGAUUAUAUCUUAGUGAU  
>N634  
AGGGUCAGGGCUGUUCUCAAACUUGGUAUGUAGCUGAAAUG  
>N635  
UUCAGUGUGCCCAUGAAAAACUAGAAUCAUGUACUUGACU  
>N636  
AUUUUUUGAAAAAAGAAAACUUAUUUCUUUAACAGUUG  
>N637  
GGAAACAUAACAUAUGGGAACUAAGGACCCUUGGUACUGG  
>N638  
GUAACAUCCAGGAAGUGAAACUUUGGGUUGGUUGAUUAU  
>N639  
AGCCAAGCAGAGUCCACGAAACUAGAACAAGGAGCACAACU  
>N640  
UGACUGUCAAUAUAAGGAACUCUUUCAAGUGGUCGGUC  
>N641  
GUGUCCAGCUAAAAGCUUGAACUCUUUCUGUUUUAUGGUG  
>N642  
AUGUCCAUUGAUGUGACAAACUAGUGACAGUGAAAGGUGU  
>N643  
CACAGCCUUUUACUGUAAAACUGACCAUUGUCGCACUGGG  
>N644  
GGAAUAACUAUUGAUUAAAACUUAGUUUUUCUAAAUGUU  
>N645  
AGAAUUUUGUGUCUGUUGGGACUUGAAGUGUUUACCAUUA  
>N646  
AGCUGAGACACUUGGAUAGGACUUAGUAAGGAUUCUUUUU  
>N647  
AUGCAAACCUAAAAAGUAAAACUCAAAACAAGCCGAGUUG  
>N648  
CAACCAAAUAUCUAGCAGAACUGUAACCCGUUAUUGGAAG  
>N649  
AGUGAUAGGCCGGUCACUGGACUGCCUUUCCUAGUCUCUU  
>N650  
GACUGGCCACACUGGCCAGACUUGAGCUUCUGAGACCUCA  
>N651  
GUGCUUUGCAAUUUGAUGGAACUUCGACUUCAUCCUGAUU  
>N652  
AAAAAAAAGGACAAAUGAACUCUGAAAAAAAAAAACCCU  
>N653  
GAGGGAGAGGGAGAGGAGAGACUGGCAAUUGCCUUUGAAAC



>N654  
AAAUGGCUUUGGCUUAUUGGACUCUUUGUGGUUUCAUAUAA  
>N655  
CUCUUUGUGGUUUCAUAUAAAACUUUAGAGCGGUUUUAAUAU  
>N656  
CUGGUUAGUUUUUGAUUCAGACUAAAGUAAUCUGAAAAGAU  
>N657  
CCAGGGAAUAGCUUCAGUGAACUCAGCCAACAAAGGAGCUG  
>N658  
ACACAAGCUCCCGGGGUGGAACUUUGCCAUUAGUAUUGUUU  
>N659  
UUCUUGCUGUGUCUGCUCAGACUGUUAAAAGCAAUGCCCG  
>N660  
GGAGUGGAUCAUGGAGAGAGACUGGGAGGAAAAGUGGGCGU  
>N661  
GGUAAAGAAGACAUACCAAGACUAACUGCAGGGAGACAGAU  
>N662  
AGAGAUGUGGGGGAUUUUGAACUACCCAGACAAGGUCAGAG  
>N663  
GAUAGAGGAGACUGAGGUAGACUAGGGGAAACUAAGGUAAG  
>N664  
CAAUUCUCAUGACUGAAAGAACUAUACCACGAUGUGCUAGC  
>N665  
UGAGACCUACAGCUGAAUAAAACUCACCCCUUUCUAGUUCUU  
>N666  
UUUAAAGCUCUUUUCUUCAGACUGACACUUUUCUUCAAGUG  
>N667  
GUAGAACAAAAUAUAACAAACUCUGCCAAGUAUUUUUUUU  
>N668  
AGUAGAUCAAUCAAGUCCAGACUGAAGGACGCAAAGACUGA  
>N669  
UUUUAAAAUUAUUGUUUAUAAAACUCAGGGCUUCACUCAUGAU  
>N670  
UUGUCAUACGGAAGGCUUAAAACUCACUGCCCGUGCUAAUGA  
>N671  
AGUGUAGAAGGGAGAUGGAGACUACUCUGUCCAUUUUUAUAG  
>N672  
CCCGGUCGUUAAUAGUUGAACUCCCCAAAUAACAGAUUACA  
>N673  
UGCUCGCCACGUACUAUAGACUAGGCAAAAUAUUCAUGA  
>N674  
UAGACAAGAGAUACUCAAAAGACUCA AUGCUGAAACUCCUC  
>N675  
CUUGGAUGUCUCAGUAUAGAACUUGGGGAAAUCUGGUCUA  
>N676  
UCUUUUGAUUGAUAAUAGGAACUUGGAUACAAGGUGGCUGA  
>N677  
UCCAAUUCUGAUCCUUUGAGACUUC CAGAUACUGCUCCCAA

>N678  
CACAGCCUGGCAACAGCAAAAACUGGUUGUAUGGUGUAGAUG  
>N679  
ACGGGGUUCGGUCUCCAUGAACUUAUCUUCAGAUUGUUUCC  
>N680  
GGCUGAAUGGUGGCUGCAGAACUGGUUACCAUGGGCUGUCA  
>N681  
AAUGAGCCCCAGUAGUCCAGACUCAAGAAUAAGUCCAAUAA  
>N682  
UGGAGAUUAUUAAAAUCUAAACUCAAGGGUUACACACUCCU  
>N683  
UUUAUGGAGGACCAUAAAAAACUGUAGGCUUCAGUGAUGCC  
>N684  
UUUAUUAUGCAGCUCACAGAACUGUUUCAUUAGAAAAUCU  
>N685  
GGGAAAGCUUGGAGACUGGACUAGUUGC UUCCUCUCAGC  
>N686  
UUUUUUUGUUGC UUUGUAGACUUAGAAGAGACUCAGAAAA  
>N687  
CAUGGCAGUUUGUCCAUGAACUGAAAUAUACAGAAAAAA  
>N688  
AACUUGGACUACAUAGUAAGACUCCAUCCAGCUCAGGGGG  
>N689  
GGGCCAUGCAGAGCAGCCAAACUUGAAGAAUGCUUCUCUAG  
>N690  
UGGUGACCAAAGCUCUUAACUCUCUGGACCUCUGCAGUC  
>N691  
GAACAAGGUGCUUCUCGCAGACUAAUUAUUUACGACUGUA  
>N692  
GGACUUGCUCUUGUAGGAGAACUGGAUUCUGAGGAUACCAU  
>N693  
CAUGAGGCAUCAUAUGGAAACUGUAAUUCAGUGAACAUUGU  
>N694  
UGUAUCCUGUGUGUUCUAGACUUGAUCUCUUGAUUAUAUG  
>N695  
GCUCUCUGCCUCCCAGAGGACUGUGGUCUCAUCCCCAUG  
>N696  
UUCAAGUAGAUAAACAAUGAAACUUAUUGAUUUUCACACA  
>N697  
UAAGUAAUAAAGUAAGACAGACUUGCACACUCCUUUGCAA  
>N698  
AUUCUGUGGGGCUAGUAAGGACUUUGGCAUGAGUUUGCCUC  
>N699  
GAAGCAUAGCUUCCCUCUGGACUAAGGGCACAUUAUUAUUC  
>N700  
GAGCCACACCAUAAGGAAAACUGACUCUCCCUCGAAUCA  
>N701  
ACACCUCUGGGAAAGGGAAACUCAGUUUUCUCCAAUUGAG

>N702  
UAAUUGCUGAGCCAACUUGGACUACAGAAUCUCAAACAAA  
>N703  
AUCCAGGUUCAGUUUCCAGAACUGACAUCAUGCCUCACAAC  
>N704  
CUAUGUUUCUCACUACCAAGACUGUACAGUAAAAAGCAACC  
>N705  
UAUUUGCCCACCAAGCUCAGACUCCUGAACAUUUCAGCGUG  
>N706  
CUAACACCUGCUGCUUCAGGACUAGGCACAUGGAAAUCGAG  
>N707  
AGCCAGGCAGGAUACUAUGAACUAGUACACGCAAUUGCACC  
>N708  
AAGGCUACGUGAGAGUGGGAACUCACACGCUUACCUCUCAG  
>N709  
GCUAUAAACAGACCGGAUGGACUGGGCAUCUGCAUGGCCCA  
>N710  
UCUUGAUAGAAUAUCUGUGGACUGAGGGACAAGGGAAGAAU  
>N711  
AAGGUUAGCCUUCAGAGCAGACUCCCACUAAGUUAGGAAGA  
>N712  
CCCUGAACUAUGUAAUCAGAACUUUUCAAUAUCAAUAUCUA  
>N713  
GGCAGGGUACCAGCAGGUAGACUCUCUGACCUGGACCUCCA  
>N714  
CUGGCAGAUCUGCCAUCUAAACUGGGGGCCUCUUGUUAGCU  
>N715  
GGUCUAAUUCUCUCUUCUGAACUCUCGAGGCAUUGCACACA  
>N716  
ACGACAUGACUAGAAAAUGGACUAUGGGGAGAAGAAAAAGC  
>N717  
UCUUAGUAUGGCUGAGUGGGACUCUGACCUAUGGGUAUCAC  
>N718  
CUCUCCGGUGCGCCUGAAGACUGUGACAGUGCUCACAUAC  
>N719  
CUUGCUCUAUAAGCAGAAGAACUUAGGUUUGGUUCAGCAGC  
>N720  
AAACAUCACAGUUUCCAGAGACUACCCCACCCGGGGAUCAU  
>N721  
CUAUAGUAGUGUAAUUCAGAACUAUUAAAACAUCAAGGGCU  
>N722  
AUGUGUGGAUGUCAGAGGAAACUUUUUAUAGUCUCUCAUUC  
>N723  
AGGCAUCUGGAGCCUAGAGGACUACACGUGUGCUACAAGGG  
>N724  
AUUCCCCAGCAAGGAUGGGAACUUAGAUGCAUUUCCCUUCC  
>N725  
UGCUGAGGGGAUGCUAUAAAACUGUAGCUAUGUGCCACCCA

>N726  
AGAGUGACACAAAUAUCCAGACUAGAGUGAGCUACCUAAUU  
>N727  
UAAAAGAAUAGGAAGAUAAAACUCCCCAAAAGCUGCCUCUA  
>N728  
ACAAAAACAAAUAAAAAAAAACUGUCUAAAAAACACAAU  
>N729  
UAUGUAGGUCUUGGGAUAGAACUCGAGUCCCCGGGCUCAG  
>N730  
ACAUGAGAUCUGUUGUAGAACUGGGAAAGGCAGUCUGGUU  
>N731  
UAAUUGCCUAAAACCACGGACUGCCUCUUACACUGGGAU  
>N732  
CCAGGGAAGCCAGGGCAGAAACUGAUGCAGAGACAGCGGAG  
>N733  
AAUAAUAACAAUAGUAAGAACUCACACUGGACUGUGAGAA  
>N734  
UUACCAGUACACAUUUCAAACUGAAAUAGUAAAUUGAAA  
>N735  
CCACCUCUUGAACUAGAGAAACUAUUAGCUAAUAAGAGGCU  
>N736  
CUGAAAACAUUUGUCAGGAAACUUCCAACACUGCUGUCACC  
>N737  
CAUGUUGGCAUCCUUGUGAGACUCACGGGCUGUGAU AUGGC  
>N738  
CUUAUGAGCCCCACUCAGGGACUGGGCUCAGAGCUGUCAAC  
>N739  
UUAGAUCUCCUUUAUUGAACUUCCAAAGAAAGACCUAGA  
>N740  
CUUAGGUCUCUGAGCACUGAACUGCGAUGUGGCUUUUGACU  
>N741  
AUGUGGUUGCUGGAAAUUGAACUCAAGACCUCUGGAAGAAU  
>N742  
UAUCCCUAUCUACUCCUAAACUGAAGGAGAAAAGCGAAUG  
>N743  
UAAUGCAGGUCUGCAUCCAAACUCACCCUUGGAUAAGGAGA  
>N744  
GAUGGACCUCUAGGUUCUGAACUUUCCUCCUGUGGAUAUAG  
>N745  
AUUUUCCAUUAAAAGAUAAACUUAUGCCUUGUGUGUCU  
>N746  
GAGAUUUUUUUUAUUCUGGACUGUAAGACCUGAUUUUCUA  
>N747  
UGCUGUCUAAAAGAACAAAACUAAACAAAACAAAACAUC  
>N748  
UACCACUACUCCAGGAGAAACUUUAUAUAAAUAACUAAUU  
>N749  
UCCUCAGAAACAUCUGUGAAACUUCACAGAGGCAGAAGUAG

>N750  
ACUCAAGCUUGCCUAUAGAGACUUAUUUCUCUAGGUGCCUU  
>N751  
UAUGCUGUAAGGUAAAGGGAACUAGGGUAAUCCCAACUUCA  
>N752  
CAAGGGACAACUAAUUUCAACUUCUUAGGGCUGGGAUGGU  
>N753  
GCCUUUGUUAGAACUGCAAAACUAAUCUAGUGCUGAUCAA  
>N754  
AGGCCCCUCCACCUUUGGAGACUAGGAAGGCCGCCAAACAG  
>N755  
CAGUCUGGUCAAUGAAGGGAACUUAGGUCAGAGGAAACCUC  
>N756  
UUAAUUUCUGGGGAGAUAAAACUCUCAUAGCCCUAACUGUC  
>N757  
AUAAUUUUUUCUAUUAAAAACUUUCCCGGAAAUGUGUUCG  
>N758  
CAGCUCUCUGGUCAAAAUAACUGUCCCAAGAAACUUUCCA  
>N759  
UCCGGCUCCAUCACUCCUAGACUGUUCCCCUCCACUGCAAC  
>N760  
UGGAUCAUGAUCAUGGAUGAACUCUGCUGUUUCCUCAGUCC  
>N761  
AGCUCACAGCAAAACAAGGAACUCUGCUUUCAAAAGUUACA  
>N762  
GCAAGUUUUUAUAUCUUUAGACUAAAAACAAAACGUUAGAA  
>N763  
GUAGCCCCAGCUGACCUAGAACUUCUGUCUAUCAACAACU  
>N764  
GCAGCCAAAGCUGGCCUUGAACUCAUGACCCUCCUGCUUCC  
>N765  
UGGCUGGCCAACCAAACUAGACUGUUAAACAGUUUGUCUUU  
>N766  
GACAGAGUCACAGAAUUGGGACUGCCUUUGUCCUCCUGCU  
>N767  
GGUAGGGAGUUCAAGGCCAGACUGGACUACAAGUGAGAAGU  
>N768  
AGUAUAUUGGAAACAAUCAGACUAAUCUUUGAUUAACUGUU  
>N769  
UGAGAUUGAGGUUAGCCUGAACUAUGUAAGAUCCCAUUUGC  
>N770  
UGGAUCUGAGAGACACAGGGACUUAGAGAAGGGAGUGGGCA  
>N771  
UUCAGGUAAGAUGAUCAAGAACUUUACCCACCGAGAUUCAU  
>N772  
GGCCAUUCUCACUCCAAGACUCAUGAAUUUUGCAUUAUU  
>N773  
CUGAAUGCCGAGCAUUGCAGACUCCAUCUCAUUUACUCCCC

>N774  
GGUUCUGUAUAUGACAGAAAACUGUAUUUGCCUUUCUGAGU  
>N775  
AUAUGUGUGUGUGUAUGGGGACUGGGGGAUACAUUUGGACU  
>N776  
UCACCAUGUGGUUGCUGGGAAACUAAACCUGGGUCCUCUUAC  
>N777  
UUUGUAGAGGUAAGAGAGAAACUUCUAGAAUUGGCUCUUUC  
>N778  
UAAACAAAGCCCCUGGGAGAACUCGGGCAAACUGAACACCU  
>N779  
UUACUCUAAAAUUCUUCUAAACUGGGCAGUCCUUUUCCAAA  
>N780  
AUUCUGAGGGAGAGAAGGGGACUCCGUGUGUGUGUGUGUGU  
>N781  
CCACACUUUUGAUUCUGAGAACUUCAAACAUGUUAGAGCUA  
>N782  
AUGACAGGCGGUACCACUAGACUAUCUCUUAUUUACUGCUU  
>N783  
UCCUUCAGUGGACCAGACAGACUUCAGUUCCAGCAUCCAG  
>N784  
CUUGAGGAAGCUCCUUGGAGACUUGUUUUCUCCUGCCUUG  
>N785  
GGUGUGUGUGUGUGUUAGGAACUUCUUUUUUUUCUCUUU  
>N786  
UGUUGUUGGAAGGUCAUAAAACUCUUAAGUUAAGGUCUG  
>N787  
GGGAGACUUGAGGGAGGAAACUAAGUAGGGAGGAGAAUGG  
>N788  
ACAUGGCAUUAUAAGAAUAAACUGCACAUGAGAUUUGAUC  
>N789  
GUUCAAGAUUUAAUUGAAAACUUGGCUCGCAUUUCCAGU  
>N790  
GCUCAGGAAAUGUGUCCUAAACUGAACCAUUCUGUUGUCAG  
>N791  
UGAUGGGUCCCUCAGGAAAACUUGACCUCGUUAUUUAUAA  
>N792  
ACAAAGAAAAACCCCAUGAACUCCAUGCAAAGCCUCUGAA  
>N793  
AAGCUCUUUCUACCUGAGGAACUGAAGAACACCGCCAACAA  
>N794  
AGCGUGCUUUAUCUUCUAGAACUUCACAGCACAUGGUUAUAG  
>N795  
CUUCCAUUCGGACGCUCAGAACUGAGGGGAGAGAUGCAAGC  
>N796  
GGACUCCAGAUGAGUGAGAGACUUUGACACACACACACA  
>N797  
UUCUUGCAUGUAGUCAAAAAACUCUACCAAUGCAGCCACAC

>N798  
AGCUUUUUGUGCAGUUGCAAACUCG AUUUUCAAGCUCAAAC  
>N799  
AUCUGCACUGAUGCAUAGAGACUGGGGUGCUCUCUGGGAAU  
>N800  
CUCCGUCGGCUGCUAGGUGAACUUUACAUCAUAGGUAAG  
>N801  
GCUCUGGAGUGCCUCUGGAGACUGUAAACCCCAUGUACAGU  
>N802  
CUCUCUAGCUCACCAUUGAAGACUGGUAACCUUCUAGACCU  
>N803  
GAGAGAGAGAGAACCAAGACUACCUAUUAUCCAAAUUCUA  
>N804  
AGUGUGGGCUGAGUUGUGGGACUAGAGGGGACUAGAUAACG  
>N805  
UCUGGCCCAGAGAAGGCUAAACUUAGUCUUGGCUGCUUGGA  
>N806  
GAGACUGGCUUGUGAGAGAAACUAAAAGAAGUAAACAUGCC  
>N807  
UGAGAGUUGAGAGAGAAGGAACUUUGGUCUGAAAAUUUGAA  
>N808  
ACUGAGAUGGCGGCUCAGAAACUGGAGGGCAAGGAAACAUG  
>N809  
GCCAGAGCAGGCACCUUGGGACUGGAGUUACAGAUGGUUUU  
>N810  
CUAGGUGUAUAAGAAAACAAACUGAGUAAUCCAGGGAGAGC  
>N811  
GUUUUAUCACAGCAGUAGAAACUCUACCUAAGACAGAAAU  
>N812  
CCAGAGACCACAGAGCUGGAACUGAGGUCUAUGUCCGCUCC  
>N813  
AGUGAGAAGGGAUGAGAGGAACUCAUUAUCCUUGGUUCA  
>N814  
AACAGCUGCUUGCUUGGGGAACUUUUUGUUCUCUCCCAGA  
>N815  
UCACCAGAGAACUCAGGAAGACUCCAUCAUGCUGAUCUUUA  
>N816  
CUCAGAUGAGGAUGCCUCAAACUAGCAGAAUCCUUUCUGGU  
>N817  
ACUGGACUCAAUUCACCCAGACUUGUAGACACAAGCAGGUC  
>N818  
ACAUUGAAAUUGCCUUGAAGACUCAAGAUGUAAAGAUGC  
>N819  
CAUUGUUGAGACUGCUAUAGACUAUGAGGACUUUGAACAUU  
>N820  
ACCUCCAAGGUCCCACUGGACUCUCCACAGGAUCUUAGAA  
>N821  
AUGAUCUGAGUGGUUCAAGGACUUGCCUGAAGAGGCAGAGC

>N822  
CCCUCAAGAUUGAUUCUGGGACUCAACCAGCCAUGCAUGUU  
>N823  
CUCAUGAAAAUAAGCCAAGAACUAGGCAUGACUGGGGAAUU  
>N824  
AUGCUUUUGGGAAAACAAAAACUUUGGCUGUUGUUGAUCUA  
>N825  
AAAACUAAGCGGAGACACAGACUCUCACACUCACGGGAAGA  
>N826  
ACUCGGUGCUCAUUGGAAGGACUGUGUGGGAGGGAUUAGGA  
>N827  
UUCUGGAAGAAUAGAGAAGACUUUCUGCUUCAGUAGUUGA  
>N828  
GUGCAGCCACCGUCAGAGGACUUCAAGUAGAAGUAAGUUC  
>N829  
GAUCUGCAGUCUACCUCUGAACUCCUGGCUGCUGCCAUUGG  
>N830  
CAUUCUGUCACUGUUGAGGGACUGAAGUUGGGGACAAACC  
>N831  
GGGCCAUACAGGAGGGGAAAACUUUCUGGCAUGGCCCGGAA  
>N832  
GAGGACACGGGAGGCUCAGGACUGCUUUGGAUCUUAGUUA  
>N833  
GCAGCCAUGAAUGACCUUGAACUUGUCUUUGCCUAGCUUCU  
>N834  
UGUUAAGAAGCCAAUGAAGAACUUGAAUUUCCGAUCAGUGC  
>N835  
GGAGUUUUGUAGCAAUAGAAACUCUAAGACACUGGUUGAGG  
>N836  
GUGAAGUGCUGUGGGGUCAAACUACGGUCCAAGGAUGGUC  
>N837  
AACUUUAGAUUUACAGAGGAACUGUGGUUAGUGCCUGCACA  
>N838  
CCAUAACUCUCGAGGUUCAAACUUUAAAUAUAAGUUGUGGG  
>N839  
CUAAAGCGACAGAGUCACAGACUUUCCAGAGCCCGUAGGAG  
>N840  
CUUUCAGAGCCCGUAGGAGACUGAUGCUCUUCAAAAGCUG  
>N841  
CCCACGUGUGAGUCCUGGGAACUUAGGUCCUUGAGCAGCUG  
>N842  
GAGAGUGUUUGAAAAUAGGACUAUCACCCAUCUUUGACGC  
>N843  
UGCAGAAGCAGCUAGAAUAGACUAAGCUGAUUUCUACUAAA  
>N844  
AAACCUGAAGUUCUGCUCAGACUACCCACUGGUGUUUGCCA  
>N845  
UUUUCAUUAUCUGUACUAAACUCAUCAAAAUGGUGUUUUG



>N846  
CGUGGAUAUGAUGAGGCAGAAACUCCUGGCCCCACAGCAGGA  
>N847  
CACUUUCUCUUCUGAGAAAGACUGGUUUCUCAGCGUUAAC  
>N848  
AACCCAGAGUUUCAGGUAAACUCUUGCAGGAAUAUCGAUG  
>N849  
CAACAAACAUACAGGAGAGGACUGCUGGGUCUGUGUUCAUU  
>N850  
CUCAGUGUAGUGCCUUUAAGACUGAUCUAUAUUGAUGCAGU  
>N851  
GGAACUUGC UAAAAAGGCAAACUCUCAUCCAUCUCUUAAC  
>N852  
ACUCCCAGUCUUGUGCUAGAACUUUUGAGUAUAUUUGACAC  
>N853  
GUGUGGGGGGGACCUUGGGAACUAUGAGCCACAACACGGUA  
>N854  
CAUACUUACACACAAACAGGACUCUACUGUAAAAGCAAAGA  
>N855  
UCUUGAGUUGAAUGCCCAGAACUCACAUAUAAAAGCAAGGU  
>N856  
CGCUUUGGUGUAUCACCUGGACUUGGACAUAUCCAGCCUGA  
>N857  
AUCAGGAUCACUGUGGACGGACUGAGAGGUUCUCCAGGCAU  
>N858  
ACACUUGUUUUGCCAAUCAAAACUGUAUGCAAGUUUAUUAAG  
>N859  
UGC UUGCAGCCAACCAUUGGACUGAGUGCGGGGGCUCCCCA  
>N860  
AGAGGUAAGUCAUACUUGAGACUUACAGCCUUCUACUACAU  
>N861  
AUCUGGAUUACACAAAGUGAACUCAGUGUGGACUAAGGCUG  
>N862  
GACCGAU AUGGACCACUGGAACUAGCUAAUCGGUCAUGGUA  
>N863  
UAACGGCCUGUAGCAA AUGGACUAGCUGGAUGGCCAGAGAG  
>N864  
CAGCUAUACCACUCUUGGGAACUACCCAAAGGACACUCCA  
>N865  
AUCUCUUGUAGCCAGGCAAAACUCCCAGAGGAGACUGGG  
>N866  
AUGUAAAGGGCCCUAUAGAGACUGGGAUUUCAUACAGCGUG  
>N867  
UGAUGAAAACUCAGGACAGAACUCACAAACAAAUCAUGC  
>N868  
AUAGGCCAAAACCUUGGCCAAACUUAUAGCUCCACAAUGAGG  
>N869  
CAUUCAUACCAAGCGUCAGAACUUCUGGCAGUGAGGUUAG

>N870  
UAGGCUGUUCAGCCAAGUGAAACUCCAGGGACCUACCAAUCU  
>N871  
AAAUGGGAAGGAAAGAAAAAACUGUCUCAGGUAGGAAAUGG  
>N872  
UGUGCCUGUAAGCUAACCAGACUUCCUACAUGGUCUGCCUA  
>N873  
UCCCUUGGGAUCCACCAGAACUUGAAGGUAAGACCUCGUU  
>N874  
AAUUCUGUGUGUAUAAACAGACUUCUCAGGCAAGGCAGAC  
>N875  
CAACUCCAAAGUCCAUAGACUAUAUAUAAAAAACAAAAC  
>N876  
AUGGUGCCAACUUGCAGGAGACUACCACCCAGUGGAUUAU  
>N877  
CUUCAAUGUUCUAUCUUGGACUCUAUUUGUCUGAGAAGCC  
>N878  
GUAUUUUUAAAGAAGCCAAAACUCUUAACUACAAUCAUGUAA  
>N879  
UCCAAACAGGGCAGUGAGAACUGCUAACUGUCCUGUCUA  
>N880  
UGGGAUGGUACUUUCAGAAAACUGUGACCAUGUUCAUUUGG  
>N881  
ACUCAUAACAACAACAAAACUGAGAUGC GCCGUGCAGUG  
>N882  
GGCUAAUAUCCUUUCGGAAACUAGCCUUGGGAUCAGGUUU  
>N883  
CAUUAGACAUUAGAAAUGAACUGACCCUAGAAUUAGCGC  
>N884  
UGGAGAGGGCCGCAUGGAAGACUGAUCAGCUUCUGUACCUA  
>N885  
CUAACAGUUCAGGAAGAUGGACUAAGUUCUAUUCAUCUUAU  
>N886  
GCAUUUCUUCUACAUUGGAACUUGCUGUAAGACCAAGAGA  
>N887  
CAAAGAAAACGCAUGGUGGAACUUGUGGCUCUGCCUAUAUA  
>N888  
GUUCUAUAAGACUUUACGAAACUCUUCUCCAUGUUGGCACAC  
>N889  
ACACCUAUAUAUUUGAAAAACUCCUUGAAGACAAAUAAGA  
>N890  
UCCAUUUGCUGUAAAGAAAGACUUUUCUCCUCCUCCAA  
>N891  
UUGCAGGGUGUUGGAAAUAGACUUGGGGGUCCAUGGGUUAG  
>N892  
UGUUCUCCCAUCAUGAUGGACUGCACGCUCAACCCCAA  
>N893  
AGAAUGUCAGAUSCCCUGAGACUGGAGUUACAGAUGGUUGU

>N894  
UCACAUAAAAUAGGUUCUGAACUUCAGGGUAACAUUUAAAA  
>N895  
AUAUAUAUAAGAGUUUUAGACUGACUCUUGGAAAGCAUGG  
>N896  
GUAUCAUCUUUAGAAUUGAACUUAGCAAAAAGUUUAGUAG  
>N897  
AUCCUAACCUUGCACAAAAAACUUAAAAAUUAUGGUUAAAA  
>N898  
AUACUAAUUAACCCAGCAAAACUAUCUGUCAUAAAUCAAGU  
>N899  
AAGAAGAUUAAAGUAGAUAAACUACCCUGAGAACUCUCCAG  
>N900  
AUGACCAAGCAUGGUACAGAACUCCUGAGGACACUUCUGAG  
>N901  
UCUAGACUAUACCCAGCAAAACUACUAAUUGUAAUAGAUGG  
>N902  
CAGAAGGUGUUAACAGAAAAACUUUAACUUGGAAAGGUUAG  
>N903  
GUAUUGAGCCACAAAAUUGAACUCAUGACAAAUUCACCUG  
>N904  
AAGAGGGAAUAGGUGGGAAGACUGCAAGAGCCAGAGGACAC  
>N905  
CAGAGGAAUUGCAAUAGGAGACUGUUUUAAGUCCUAUCUU  
>N906  
CAGGCACAAUCACCUGCCAGACUGGAGCAGACAAGCAAACG  
>N907  
GCUGUGGACUCAGCCUCUGAACUGUAGGCUAGCUCUCAGUU  
>N908  
UUGGUCUGUAUCAUAACCAGACUGCCGCUUUGGCAGCAUCA  
>N909  
CUGUGUGACAAAUUCACAGACUGAGGUGAUAGACCUCAAC  
>N910  
UACUUGCUCUUUAGCCAGAACUUAUAAAUGCAAGCCACU  
>N911  
GUUGCCAAGCCAGUGGAGAGACUCAGUUAUGAGUGGAUGGA  
>N912  
GCUUUGGGGAGAGGACAGGAACUGCUUCAUUGAUUUUAUUUA  
>N913  
GGUACCCAGUGUAUGCACAAACUUGAUUGGAUGCCCUCACC  
>N914  
UUAGAGGAUAAAGGAGAGAGACUCAUUUUGGUCCAGAACCA  
>N915  
CAGAAGGGAAAAAGUCCAAACUCAGGCAACAGAAUGAGAA  
>N916  
CAAAGUAAGUUGUAAGUCAAACUGUUAGAAUCCUAUGUGAA  
>N917  
CUGUUAGAAUCCUAUGUGAAACUUUCAUAGAUUAGUGUAUG



>N942  
GAGGCAGGAGAGUCACUGGGACUUGCUGUCUGCCAGCCCAG  
>N943  
ACAAGGUUCUAAUUCAGUAGACUUCAGAGCAAAGAAAGGAA  
>N944  
AGUUACUGCACCUUCAUUAAGACUCCUUUCUUUUUCCCUC  
>N945  
GCCAGUGAAUCAAUUCCAGACUUGAGACAGUUUGCAGAU  
>N946  
AAUUACUGCCACUAUCAAGGACUUGAAAGACGCAGGGGUGG  
>N947  
GGAAGUAGCAACCACUUUGGACUCAUUGGUAACACAUAUGC  
>N948  
UAUCUAUCAUACUGCACAAGACUCAAGUCCAAGUGGAUCAA  
>N949  
AACAGAGGGAGAGGAGAAGAACUUCUGGGUCCACCCCUUGG  
>N950  
CAUACCAACAAAAACCACAGACUUUUGAAUAGUCUAGUUUC  
>N951  
AUCUCCUGUAGCCAGGCAAGACUUCCAAUGGACAGAUUGGA  
>N952  
AUCCAGAACUGCAUAGCGAGACUCUGUCUUUAAAUAAGU  
>N953  
UUUGCAGGCAAAUAGAUGGAACUAGAAAUAUUAUCCUGCA  
>N954  
GAGAAUGUCCUUUCCAAGGGACUCCAUUGGACUAAACCUCU  
>N955  
AUGUUUCAUUCUCAGGGGAAACUGCUACAUAACAAGGAAG  
>N956  
ACUGUUUUCUUAUCUAGAAAACUCCAGGACAUCUCCGAGUU  
>N957  
UUUUGUCCUGACAGUUUGGACUUUCAUAUGGUCUUCACAU  
>N958  
AUUUUUAUUGGAGAGGAAAGACUUUAUUUCAUCUUAUAUCU  
>N959  
CACAUCAAAGUGACACAAGAACUAUUUACAUAAGCCAACAGG  
>N960  
UUAAGAUUCUUAUCUGUAGGACUUCACAUAACAAGGUCAA  
>N961  
AAUUGAACUCAGGUUAUCAGACUUGGCAGCAAUGUCUUUA  
>N962  
AGUAAAAGCCAGUGACCCAAACUUACUGUAACAUUGUAUUA  
>N963  
ACUCAAAUACUGUUUCCAAACUCCUACUUCUUUAUUUGUU  
>N964  
GGGAGAUUCCUGUUGGUGAAACUAUAAGUAUACAUUUGAAA  
>N965  
AUGGUGUGUAUGAUGGCUAGACUUGAGGCUGGAUCGUUGUA

>N966  
AGGACUGAUGGAAACUGAGAACUUUCAUUUAUAAUAUCUGUA  
>N967  
UAAUCAGGCAUUUAUCCAUAAGACUGACUACUGGCCAAGAGUA  
>N968  
GGACGAUGAUGGCACCAAGGACUUAGCCAUUCAAAAAAAAAA  
>N969  
UGCAUUCAUAGGCCUUCUAGACUGUUGCUGUCAUCUGUGGU  
>N970  
AUAGAAUUUAGCUAAAGGAGACUUGAUUUUUACUAGCCCGU  
>N971  
AAUCUUGCUIUUUCUUGAGAACUUGGAAUUCUAGCAAAAA  
>N972  
AAUAGUGGUUUUAACCUGAACUCGGCCGCACUAGCAUGGA  
>N973  
UUGAGCUUGUGGGAGCACAGACUGGGAACUGAUGAGAGCCU  
>N974  
CUUGACUCUCUCGCCAAUGGACUCAUCUACUUGUUAAAGGG  
>N975  
GCUAACCAGACCCCGAAAGACUAACAUGGUGUAGACUCAC  
>N976  
ACCAGGCAGCUUCCUAUGGGACUGGAACACAAAUCCACUCA  
>N977  
AUUCAUCCAAACUUUAAAAACUAAAGCAGCUGAAAAUACU  
>N978  
UGUCCAUAAGCAUUCAAGAGACUGGAAAAAUGGAUAGCACA  
>N979  
AUGAAAUAUCAAAACUCAGGACUGAAAUCAACCAAGUAGAA  
>N980  
GCCACAAUUCCAAUUUGAAACUGUGAGAGUUUAAAAUGAA  
>N981  
AGUUUUGAUUUUGGUUCAAAACUUUCCAUUUUCUUGAAC  
>N982  
AGUUAGAAGAUAAUACACAGACUGCAUAGGGAGAGAGGAAU  
>N983  
AGACACCAAUAUUAUGUAUAGACUCAUAGACAUUUUCAAAG  
>N984  
CUUCUCUUGUACUGCUAAGACUUUGAGCAGUUUACUGAAC  
>N985  
ACUAUGGAGCUUGGCUUGGAACUAACAAUCCCCAGCCUCA  
>N986  
AAGCUUUAACAUGUACCAAACUACUUUCCUCCUAGCAAUG  
>N987  
AAGUAAAAUAUAUAGAUUAAACUGAAGUUGGGGACCCCUAU  
>N988  
GGCUCUCUCUUGGUCUUAAGACUGCAUAGAGCUGUGGGUUAU  
>N989  
UGGGUGGGUCAUCAUAGAAAACUCAGACUGUCACUGCUGAU

>N990  
GUUUGAUUCAUUGCUAGUGAACUAUUCCCCCAAAUCAGGGA  
>N991  
UUCUUCUGUGUCCUGUGUAGACUGCCACCAGAAGUUGUGGC  
>N992  
CAGAAGAGAAGCUACCAUAGACUUGAUGUUGAUCCAAAGCA  
>N993  
UCAGACAUCCAGCCUCAUAAACUGAACAACUACUAGAUUUA  
>N994  
AAAUUCAAAAGUAGCAACAGAACUUGGAAAACUAUAGCAAAG  
>N995  
UUCGAGUCGGGGGAAGUAGGACUCCUUCACUCCUUGCUUCA  
>N996  
UAACUGCUGGUGGAACUAGAACUGGGGAGGUAGAGGAUUGU  
>N997  
AAACAUCAAUGUCCAUAAGAACUGACACACAGGUGUGUAUA  
>N998  
CAGACUGAAGUGCCAGGUAAACUGGAGACUGCUGUCCACCC  
>N999  
UCAGGUGCCUACAGCAUUAACUCUCAGAGACAGAAAGCAG  
>N1000  
AGGUGGGGUGGGGGAUGGGGACUUC CACAUGAAGACAGGUG  
>N1001  
AGCUAAUGGAGACUAUGUAGACUAUGUGGCCAUUUGCUC C  
>N1002  
UUCUCUAAAAGGCACAAGAAACUGACAGUCUGGACACACAC  
>N1003  
GCAGGAGAUGUGGAGCAGGGACUGCACAUUAUUAUGGGAA  
>N1004  
AGCAAUGGUCUAGAAUGUGAACUCUGGCAUCACCCAAAUUC  
>N1005  
UGUUUUCUUGAAAGAUUCGAACUUUUAGAAAGUCUGGAUAC  
>N1006  
UCUGCCUCCCAAGGGCUAGGACUGAAUGUGUGCACCACCAC  
>N1007  
AAGAAGUCUAAGUGCAUAAAACUUUGUGAUAAAUGUGUUCA  
>N1008  
CUUAUAAUUAAGGAUGUGAACUCUCAGCUUACAGCUCCAG  
>N1009  
AGGAAAGGAUGGAAGAUAAAACUAACCUUGGUCUUGCAAUU  
>N1010  
GACAUAAAGAAUCGUAGCAAACUGCUACUCUUCUGGAAUGG  
>N1011  
CAAAAUGACAGCAAACCUAGACUAGCAAAACUAUCUACCAU  
>N1012  
UAGAAAUGUUUAUAUAUCUAGACUGGAGCUUUGUACACUGUA  
>N1013  
CCUGGCUCUCUAGGUUUCAGACUGGAAUAAGGACUUGCUC A

>N1014  
UUUUCUCUGCCCUGCAAGGACUGGGAUUGCACACACUACU  
>N1015  
UGUCUAACAUGUAUGUCAAAAACUUUUUAAAUGGUACACAUU  
>N1016  
CUGUCAUGAAAAUAUGUUGGACUUAGUCAAAUGCUUUUUCU  
>N1017  
UUGCAAGUACUUUGUUGAAAACUUUGCCUCUAUGACCAUUA  
>N1018  
GACACCAUUUUGACCUUAGAACUCAGUACAUAGGCAACAAC  
>N1019  
GUGCAACGUUCAAGCUAGAACUUUGAAGUGUGGGGACCCU  
>N1020  
UUUGAGUUGUUGUUUUUGAGACUGGGUCGUGAUGUGUAGUC  
>N1021  
CCAGAGGUCAGUCAACAUGAACUUAGUGAAAUCAUCAGUU  
>N1022  
UAAAUGAACACCUCUGGAAACUCUCUCAAGGCACACACA  
>N1023  
UAUCCAUGUAAAUUAGCUGGACUUUCCUGGGAAGGAGUGCU  
>N1024  
GAGCUCAUCUCUCAUGGUGAACUUGAUGGCCCUUGGCAGAA  
>N1025  
AUACUGAACAGCCACAAUGAACUGGUGUCGGGAUCGUGGCU  
>N1026  
GGAGCAAUUCUGGGUCAAAAACUUUGAAGAUAGUUGGAUGG  
>N1027  
AAACAUUACAUCUCUUAGAAACUGUAUUCAGUGAAACAUC  
>N1028  
CACAUUCAUGGCUUCUUGGGACUUGGUUGAGAGAGAGAGAG  
>N1029  
AUAAACAGGAUGAGAAAGAAACUAGGAAAACAUCCCUUC  
>N1030  
ACUAUGGGAUAAAUAACAAGACUCAGGAGGAGGUAGAGAGG  
>N1031  
AGGGACUGGUUCCUGGAAGAACUUUUAGCUAGUUUUUGAGC  
>N1032  
AUAUAGGGAAAGCCCACCGAACUCAUCCUUUGUUUCAGCUG  
>N1033  
CCCCUGAGGGCCUAUAAAAACUGGGACCUCUUUCCCCUCG  
>N1034  
CCAAUGCAACAGGAUCUGAAACUAAGGCUUCUCCUAUCAA  
>N1035  
AUUAAAAGUAUCAUUUACAGACUGAGAAACAUUCAGUACUG  
>N1036  
UCCAAGUAGAAUCAUAUGGACUACUCCUCAAAUAUGGCA  
>N1037  
UAGCCAUGCCCUGAGGAAGAACUUUCCAUGAUUCUUUUC



>N1038  
AGGUCCAGAAAAUCCAAGAAACUUUCCGAGGAGGAAUUUGG  
>N1039  
AUUAAGCAUGUUGUAGCAAACUAAGAUUACCUUAGUUAAG  
>N1040  
GCAAGUGCCAGGACAGCCAAACUUAGGCAAUGAAGGAAUCA  
>N1041  
GUUUUCUCAUCAUAGCCAAGACUUUUCACCAGAGCAGAACA  
>N1042  
CUGUCAUUUCGUGUUGUUGAACUCGGUUCAUCCGGCUUUGC  
>N1043  
UAUGCAGUCCUCAACUAAAAACUAAAGAGGAAAAAAAAUUA  
>N1044  
CAGGCUUGAAUUGGUUCAGAACUUCUACAUUAGUCUACUAC  
>N1045  
AAGGAAGUGAGGUCACAUAGACUUGUUGAAGUGCUCUUGAG  
>N1046  
UGCUGCAGAGCUGAGAUGAAACUAGUGGGUAAUUUCAUUGG  
>N1047  
CUUACAAAUUUAUUUGAAAGACUCCAGAGAGGUCAAGGGCC  
>N1048  
CCAGCGAGUCCUGUCACUGGACUCCAGACUGUCUAAGGCCA  
>N1049  
UUCUCUGAGAUSCCUCAAAAGACUUCAGGGUGUUUUUUUGUU  
>N1050  
CUACACAACGGUUUAAAAGAACUACAAGCAUGAAAUGCUUU  
>N1051  
GUAGCCUUGGCUGUCUUGGAACUAUGUCAGAUCUACAUCU  
>N1052  
AAUUCUUGUGAGCUACUCAGACUUCAGUCUAGCUUGGAGUA  
>N1053  
ACACUCCAAGCAUCAAAUAAACUAUUUCAUAGAGUACAGUG  
>N1054  
GUGAGUGAAUUGC UAAUAAAACUUUUCAGAACAUCACACA  
>N1055  
GAGAGAUGAUGGAUAUUGAAACUAAACACAGAGUGAAACUA  
>N1056  
AUAUUCAAAAUGAGCUAUAGACUUAAGGGGAUCCUUGUCA  
>N1057  
CUCUAGCCCCUCAAAUGAGAACUUUAAAACCAUGGAUGUGG  
>N1058  
CCUGCUGUGCGUGGAUGAGAACUGAGAGUAUAAAAGAGUGA  
>N1059  
GGGUGGGGGAACUAGGGAAAACUGUGUUUGGGCUGUAAUGU  
>N1060  
UGGGCAUAAAACAGGAUAAACUGUUCAGUAACUGUGGUGG  
>N1061  
AAACUAAUUAGAUGAAAGAAACUCAAAAGUUGUUUAGAAUU

>N1062  
UUCUCUCCUCAUCAUGUAGACUCCAAAAAUUCAGUUGCAC  
>N1063  
UAUGUCAGACAAUUAUAUAAAACUUUCUGUACCUCAAGAUUU  
>N1064  
AAUACUGGCCAGGUUGAUGGACUGGCCAACUCCAUCUCCAG  
>N1065  
CAUCCUAACUAAGACUGUAGACUACAUCUGGAUCUCAGAAA  
>N1066  
UUCUGGGAGUUCUUAUAAGAACUAUGGAGUGUUUUGUUUUC  
>N1067  
CUGCACAUUUCACUGUAGAAAACUGAUUAGUUUUGUAAAACU  
>N1068  
GUUAUAGUCCAUCAUUAUAGACUUGCAGCGGUAGGAAAUAC  
>N1069  
CAAAUUGACAGCAAUAAGACUCUACUAAGGGCAUAAACU  
>N1070  
AUAGGAAAAGAAGAAGCCAAACUAUUCUAUUUUUAGAUGA  
>N1071  
UCCAGAUAGCCAAAAUAAAACUCAACAACAAAAGACAAGC  
>N1072  
AAUGAGUCAAAAGUGCUGAGACUAUGUGAUUAUGAGAGGUC  
>N1073  
UAUUUCAUAAAUCUGUAAAAACUCACCGUGCAAACACCAGC  
>N1074  
AAAGAUGAGUUAAUAAAGAAACUAAAAAGACAUAACAGGAU  
>N1075  
CAACUCAGGCUAUUGCCAAGACUAUAGUUUGCUCUCCACAA  
>N1076  
CUAUAGUUUGCUCUCCACAAACUGACAAUAAGGUCUCAUUA  
>N1077  
AUAAAUGACAUGAUGUCAGGACUGUUGUAGGGUCCUGGAGG  
>N1078  
AGGGACAUAGAAAUGAGGAAACUGAGUAUCCCCUCAUAGAC  
>N1079  
CUCUCUCAGUCUAAACCCAAACUGUGCACUGCAUCAUGACA  
>N1080  
CUUAACCAGGCAACUGGUGAACUUCUGGAAUGAAAUGCAAC  
>N1081  
AAUCUUCAGCUUAAGGAAAACUUCAUGCAGUUUGUUAAGA  
>N1082  
ACUCAUAGGGAGUGGAGAAAACUCUCCAUAAGAAAAGACCU  
>N1083  
UUAUUUCUAAAAACAAUCAAAACUAAAAACAAAGCAAAGAA  
>N1084  
UCCUCACCUUAAAGGUACAGACUGUUGCAGGAAAUUUUAA  
>N1085  
ACCGUGCUCUGGAUGUUGAAACUUAUAUUUUGUAUGUAUUAU

>N1086  
UCUCUGUGUGUACUCACUGGACUCCGUUGCUCGUUCAUCA  
>N1087  
GAGCCUAUGGGGAACUCAAAAACUGCUUUAAGAAUAAAGAC  
>N1088  
AUUGCCAACUGUUUAGGAGAACUAGAAGUACAAGCUAGUUG  
>N1089  
GCUGACAGCAUGCUGUCCAGACUGUGGACAAGCAGGACACU  
>N1090  
AGGUCUCUGAUGCAUUGAAGACUAGAAAGCUAGAGUCUAC  
>N1091  
CUCAUGAUUCCAGGUUCCAGACUUUUGCUGAGGGGACAUCA  
>N1092  
UGCUCAUGUGCUUUGUCUAAACUUUCAGUUGUUUCAAGAAA  
>N1093  
UCCAGUCAGUAUUCAGGAAACUGAAUCAGAAGGGUCACAA  
>N1094  
UAGAUAAUGAUUUGAACAAACUUUCCCUUUUUUGGUCAU  
>N1095  
CAAAGUAAGAGAAUCCUCAAAACUGUUGCAGUUGUAAGAUGA  
>N1096  
GUACUCACAGGGUUUCCAAAACUCACCCCACCGCCCCACCC  
>N1097  
CUCCCCUCCAGAAGGGAGGGACUAAUACAUCCAAGACCA  
>N1098  
GGAAGAAAUAAGAUUUGGGGACUUUGGAUUUGUAAAGCAGU  
>N1099  
GUUGCUGUUAUUUAGAUAGAACUUAGGGAAAUGUGCAGUUU  
>N1100  
UGGGGGGGGGGGACUGAAAACUGUUGCUGGGGAAGUCUGG  
>N1101  
AUUUAGGCCUAGUCUCCUGAACUGCCAAUUUGAAGCCUGUC  
>N1102  
UUUUGCUAUCUGGUUUGGAAACUCAGCAGCUGGGCUUCAUG  
>N1103  
CUAGCUAUAGACUCUAAUAAAACUAAAUGAACAAUUUCCUU  
>N1104  
UUAGGUUAUCGUUAAAUAAGACUAUCAUGAUGAGAGCCUUG  
>N1105  
CUGAAUAGAGGAAGUUCAGAACUAAUCUUAUCUUUCUCCUC  
>N1106  
ACACGUUAUUUGUAAAAGGAACUGCACUGUUACACAUCAAA  
>N1107  
AAAACUCUGUAGGCUAUAAAACUGACAAUCCUUGAGCUCUG  
>N1108  
AUUCUGAGCACUUAUCGAAACUCCAAAUUAUUUAACCUGG  
>N1109  
ACCAGUCACCCAAAUACAAAACUUUGUAGGCAUCGCUGAUU

>N1110  
GCCUCCUCUAAGAACUAGAGACUUGAUACCCUCUCCUCCU  
>N1111  
GCUGUGGGUGUCUCUGUAAGACUCGACAAACGACACCAACU  
>N1112  
UAGACAUUUGAUCCCCUGGAACUAGAGUUACAGGCAGUUGU  
>N1113  
GUUUGUGUAUAUGAUGGGGGACUACAGGCUCUGGCUGUCAC  
>N1114  
GGGACCCAGGCUUGGGAAGGACUCUAGGCUUGAUGUCAUUU  
>N1115  
AUGCAGUUUCUUCUCUUUAGACUGGAGCAGGAGCAGGGCAA  
>N1116  
AGUGUUCAGAGGAAGGCAGGACUCUAAAGGGAACAUGGGUU  
>N1117  
CGAUGUCAUAGAUGGGGAAGACUCUGUGUGGACGAAGACAG  
>N1118  
AAUAGACAUCUAAUCCAAAGACUUUAGUUACCACAAGCAGU  
>N1119  
UACUUACAGCUCAGAGGGAAACUCAAGACCAUCAUCUAAA  
>N1120  
CUAAGAAAAGUACCCAGAAAACUGUCAUUGCCCUGUUAGUG  
>N1121  
AGAGCCUCUGAGAGAAAAGAACUCAGCCAGAUCUAUGUCAU  
>N1122  
AAGAGACUUUCCAUAACUAAGACUUUCUGCUUGAGUUAGUGG  
>N1123  
UUUCUGUCUCCUGUCUCAAACUAACCCCCACAAAGGUGAG  
>N1124  
AAAACAAUUUUUAGCAUCAGACUAUUUUCACACAUUUUAAA  
>N1125  
CUAUUUUCACACAUUUUAAAACUGUGGUCAGGCUAAUAUUC  
>N1126  
UGUUGCCUGUGGCAUCUGGAACUCAGGAAGAAUAGAGCUAU  
>N1127  
AUAGAUAGAUAAAAUUUAAAACUGAGAGAAAAUUUGCUUCC  
>N1128  
GUAGUCCUGGUCCCCGGGAAACUCUUUAGAAGGAAGAUGGA  
>N1129  
CCACUCCUAGGCACCUGAAACUUUUGAAGGACACCUCAUA  
>N1130  
CCUAGGGUCUGGGGGCUUGAACUCCAGAGAAAAGCUUCCUG  
>N1131  
CAAGAAGCAUAUAACAUUAGACUCUACUCCCAUUAGAAGG  
>N1132  
UGAUCCCUUCUAAUUCUGGGACUCUGUAAGUAGCUAACGCC  
>N1133  
UCUUGCCUUGAUCUUUGCAAACUCGUUCUGUUUGAAACACC

>N1134  
AUAGACUAGACUGGCUUUGAACUCACAAAGAUUCACUGGCC  
>N1135  
UUGAAAAUGCUUGCUGUGAGACUUAACAGACAACAAAGUCU  
>N1136  
UUUUUCACAGGUCUCUCCGGACUCUGCCUGAUGUUUGGCAG  
>N1137  
CCCUACAGCUGACUUGAGAACUGGAGAAUAUACUUCAAGU  
>N1138  
UUGAAUAAACUUUCUGGAAAACUUUUCUGUUGCACAAGCUU  
>N1139  
CUCUGAACCAAACUAGGUGGACUUACGAAGCUAGCAGCAUA  
>N1140  
UAGAUUACACAAUGCUUAAAACUGUAGCCUCAAGGAGCACU  
>N1141  
UGAGUGCAAGGCCAGCCUGGACUGCAGAGUUAGUCCAGGU  
>N1142  
CUAAAUUUAGAACAAGGAAACUUCAAUUCUAUUUGAAAGA  
>N1143  
AUAAUUUUAACAUAUCAUGAACUGAACCAUUCUAUCUCAUA  
>N1144  
GUAUACUUGUGGGCAUGAAACUGGGCAAUCUCUAUCUUGU  
>N1145  
CUCGAUAGGCACUUAAGGAAACUUGCUAUUCAGUGAUCUC  
>N1146  
CCAGCUGGGCUACAUCCAGACUCCACAUAUAUCCUACU  
>N1147  
UCUCUCCUGAAGCACCUUAAACUGCAGGUGUUCUAUUUCAG  
>N1148  
UCUAGGUUUGCUCUGAGGAACUAGUAAUAGUCACUAGCUC  
>N1149  
CUGGGUAAAGUUGACACAAAACUAGCCAGUACAACCACCAU  
>N1150  
AUGUUAAAACAAGCCACAAAACUUUGCUCUUGUCUCCAGA  
>N1151  
GAUGAACCGGAUGCUCUGAACUAUAAUAAACCAUGGUAAC  
>N1152  
AAAGCACCAAUUCUCCCAAACUAUUUCCUAAAAUUGAAAG  
>N1153  
AUAUGCAGAAUAUACUGUGAACUGAAAUUCUAGAUUAAAA  
>N1154  
UAUUCUUUCCGGAUCCCGAGACUCUUAGGCCGUCCUCGGAU  
>N1155  
ACAUCUCCUGCAGUGUGCAGACUCCCAUAUCUCCAAGAGAU  
>N1156  
UUCGUCUCCUGGAUGAAGAACUACCUCUCAAUAUGCUU  
>N1157  
UAAUAGUCAAUAGAAAUGAACUAAACGAACAAGAUGGUUU

>N1158  
UUAUUGAACAAAACUGGGAAACUCAAAUGUUCAUAUCCUCU  
>N1159  
UAAUCAGAUCUUUGGAGAGAACUGGGUUGAAGAAUGGAGCU  
>N1160  
CAAAAGUCCUCCAUUCCAAACUGUAGUCUUUCGACCUCCA  
>N1161  
GAUUUUGGACUAGGGACCAGACUGAAGGGUGGAGGUAAUGU  
>N1162  
UCAUCCUGUUACAAAUA AAAACUCAUUGUUAAAAGUAAAAA  
>N1163  
AGAUGCCCUGGCUGACUUGAACUGUGUAGCCUGGGCAGGCU  
>N1164  
GGCCAGGAACACCAUCUGAAACUGACCCAGUUCUAGAGGAA  
>N1165  
AUGUGGAUGCUAGGAAUGAGACUUGGCUCUUUAUGCUCGAA  
>N1166  
ACCAUUACAGAGUGAGCUGAACUGUCAUUUUAUAAGGUGCA  
>N1167  
CUGUCUGUGGCCAGUCAGGAACUCAUGGUGACAUGAGAACU  
>N1168  
UAAAUUGUCCAAUUCAGAAACUGAGUCUUAUACCAUAUGA  
>N1169  
AUUCUCACUGUACAGUUUAGACUGUUCUGGGACUCACUAUG  
>N1170  
GCGAAUUCUAAAAGCAGGAGGACUUGGAUGUUCAAGGCCAGU  
>N1171  
CCAUGUAGUGAAGGAAGAGAACUGGCUCUGGUAAGUUGCUU  
>N1172  
GCCCCUCUGUGGAAGGCCAGACUCCCAGGUGUUCACCCUGU  
>N1173  
AGACGUUUGGUUUCAGGCAAACUUCUUAUCCCCCUUCUCU  
>N1174  
CUUUGUGUAACUGACUUCAAACUUCAGAAGGGAGAGCCAUA  
>N1175  
UCCACAUGUGGAAGGAUAGAACUGACGGAGUCUCCUGAUCU  
>N1176  
GGUAACAUUAUACAGAUUGAACUGGCGUAUUUAUGUAUUUA  
>N1177  
UCCUCCCCAAGCAAAGCCAGACUGCAUGUGGGAGUCCCACC  
>N1178  
AAGUGGGGUUUGGACUGAAGACUUCAGCUGGGCCAGUAAGC  
>N1179  
UGGAUAUGAGCCUGAUGCAGACUUGACACCAGGCUGGAUGC  
>N1180  
CAUUUCCAGGUAGGUUGUAAACUCCUGAGGGGAGGGACUUC  
>N1181  
CGUUCUGUCAAUCCCACGGGACUCCAGGAUCUGAACCCUGA

>N1182  
CUCUGUCUCCACCUCUCCAGAAACUUCGGUUACAGGCAGAGAG  
>N1183  
AGUUUUGUUUUAGGCUAAGAACUUAAAAGAAGAAUGACCAU  
>N1184  
AAAAAACAAAAACAAAAAACUUGCACGAAAAAUUAUGA  
>N1185  
AGCCACUUGGGAUUAUCUAGACUGCUACUCUAUAGUCUACU  
>N1186  
UACCCCAAUAAAACUAUUAAACUGGCUUUAUAAAACGUUUUA  
>N1187  
AAGAAAGAAUGGCUUUCAGAACUUUAAAUUUCAGAUGAACU  
>N1188  
GGCAGAACGGUAGCCUUCAGACUGGGAUUUUAACCCGGGUA  
>N1189  
UGGACUUGUGUCCUCUGGAACUAUACGUUGCAAUAAACAU  
>N1190  
UGAAGGAAGUCAGGACAGGAACUCAAACAGGGCAGGAACCU  
>N1191  
UUGCAUCAAGUUGGCAUAAAACUAUCUAGCACAGUCUCUUA  
>N1192  
GGAGGCGAGGACUUGGAAGGACUGGGAAGGGGAAGAAUUAU  
>N1193  
GCUGUUGAGACUGUCAUUAAACUUUAUGGACCAUAAGCCCC  
>N1194  
GUGAGACCCCAUUGGAGAAGACUAAGUUUUUCUUUCCCAGC  
>N1195  
GAUAGUGCCACAAGGGAUAAACUUGUGCAUGUGUUUUUA  
>N1196  
AAAUUUAGAAAUUGC UAAAACUAGGGAAGGUUGAAGGUGU  
>N1197  
UCUGCUGUAAACAAGAACAGACUCUAUAGCCUUCUCAUCAC  
>N1198  
ACCAGUGUCCUACCACAGGGACUGAGACGAGGAAUCCUACC  
>N1199  
UUAGUACAAAUCCUUUAUGAACUUACUUUGUGGCUAUGUAA  
>N1200  
ACCUGAUUUAUUUCUUUUAAACUCUAAUGGAAUUGUCUUCA  
>N1201  
GUGGGUAGCAGGCAGUAAGGACUUAAAAGAGAAAAGAA  
>N1202  
UAGAUUCCUGUCUCUCUGAAACUGGAGGCCCAAUAAACC  
>N1203  
CUGACUUCCUGUAUGCUGGACUGUAACCUUUAAACUGAAA  
>N1204  
ACUAACGGGGUGCCACAAAAACUGCUGCAGAGAAUUUUAUC  
>N1205  
UAGUGACCUGUGUCUCUCAGACUAGGCUACGCCUGUGGAC

>N1206  
UGAU AUGCUGGUCUUUUCAGACUUGUUAAGAUGAAGCGCUG  
>N1207  
UCAU UCCAUCUGCAUUUUGGACUGGCUGAUACCUGGAUACCU  
>N1208  
AAAUGAUGGAGAUUAUGAAGACUUGUUUAAUUUAUAAAUAU  
>N1209  
UGCAACGAAAGUUUGAACAAACUUAAGAUUUUACUGUGAUG  
>N1210  
GACUAUUCAUAAACUAACUAGACUAUCAUUUGCUCUACCAUA  
>N1211  
AUUACCAAGUGAGAGGGUAGACUAUAUAGGGCUUACAUAUU  
>N1212  
UUUAUGUUCUUGUGGCUUAAACUUAUAUAAUUAUUUGAUAU  
>N1213  
GCUUAAUAUUUCCUAGUUAGACUCUGGUACUGUAAGAAUAG  
>N1214  
UACUGUGCAGCUCUAUUGAACUCAGAUUCUGGGAUUUUAG  
>N1215  
UGGUGAUUUAGUCCCUGGGAACUCUGGUUGAUUGAUUUGU  
>N1216  
AUUAAAUUUCUGACUUGUGAACUACAAAACAGAGUACCAUG  
>N1217  
CUGCUGAGCUUGACUCCAAGACUGGGGAUGGUGUGUUUUG  
>N1218  
ACUGCAUGGAGUAAAUUAGAACUUACACAAAAAUGUUGCAA  
>N1219  
ACAGAAGAUGACCAGUUCAGACUCUGUAUCCUCCAAGCCUA  
>N1220  
ACGUGCUUUUGUGAUAGGAAACUUCACAGUGUGGCUUCUCC  
>N1221  
GUGGCCGAAGAGCCAUGAGGACUGCCUAGAAGCCUGCAGGC  
>N1222  
AUGAAACAUAACUACCACAAACUCAAAAGAUCUUGUGUGGG  
>N1223  
GCAAUUUUUAUGCUGUGGGGACUAAAAGGUGCACUAUCUCU  
>N1224  
GGAUAUCUAAACUUGAAAAACUUAUUUAUUAUCAAUAUCU  
>N1225  
GAAAGUUGAAUAGUUGUAAGACUUUCAGGCUUAUUCUUACA  
>N1226  
GUAUGCACAUCUGCACAUAAACUCCUGAGAGUAAACAAUAA  
>N1227  
UUCUCCCACCAGGCAGUUAGACUAGGGGGAGGGGAUCCAGU  
>N1228  
UUUGAAAUGUUGUAGUUGAACUAUGCAGUUGUGAAUUUUA  
>N1229  
GACCUUUUUGAAUCCUGUGGACUAUACCUUGGGUAUUCUGU



>N1230  
AUUGAUAUCCUCCUUAAGGACUCUAUUUUCUUCUUGAGAU  
>N1231  
UUCAUUUUCAGGAACUUUAGACUGCCUCAGAGCAGAUUUG  
>N1232  
CUUCCUCCUCUGUUUUUAGAACUGUGGUCAAGUGUAGUAUA  
>N1233  
GAAUUUACAGUUUAAGGUAAACUUCCAUAACACUGAUGCUC  
>N1234  
AUA AACUAGGCUAGUCUUGAACUCAAAGAUCCA AUUACCUC  
>N1235  
UAUUUUAAAACUAGAAUUGGACUAAGGAACGCCCUUCGAGA  
>N1236  
CAAACCAACACAGAAGGUAAACUGUACAGUUUAGGACAAGG  
>N1237  
CGUGAGGCACUAAGAGAGGAACUGAUUUUACUCAUAAAAG  
>N1238  
AAAGGAAGGAAGGAAAAGGAACUGCAGCCCCAGUUUUUA  
>N1239  
AUUUUAAAUGAGAUCAUUAAACUGUUUUUAGUAAAACUAA  
>N1240  
UCCUGGAACUAGCUAUUAGACUAGGCUGACCUCUAAGUG  
>N1241  
UCAGCAUUUAUAAAGUAUAGACUUGUUAAGAAACAUCUAA  
>N1242  
AUUUCAGAUUAAUUUCUUGGACUGGAAGAAAGAUUGACCCU  
>N1243  
GAAUGAUACCCAGACUCAAACUGUAUGCAAAAGCAAAGAG  
>N1244  
CACAU AUGAAAUUCUCAGAAACUAUUUUUAAAGUUUCUUCA  
>N1245  
CAGCUAACAGCUUCUGUUAAACUGCUUGCUUGCUUAAAACC  
>N1246  
GUACACACAAGGCUGUUGAAACUUUAAA AUAGGUUUAACUG  
>N1247  
AUCCA AACUGUCUAGUAGGAACUUGGGGGGAAAACAUGCUU  
>N1248  
AGAACCAGCAGGUAAGGGGAACUGAUGUGUAUGCUUGAGUG  
>N1249  
AGGUGGUUCAGUAGUUAAGAACUUCUACUACUCCUGUAGAG  
>N1250  
AUAUCUCUCCGUAUCAGUGGACUCAAUUC CCAAUAAAAG  
>N1251  
UUUAGUGGGAAUAUGGGGAAACUAUAUCAGUAGUCAA AUG  
>N1252  
GGGUUCUUAACA AUGGGGAACUGUAUUAAAGGAUUAGGAA  
>N1253  
AUAGCCAAGGCUGAUCCUAAACUUUUUGGCAAGGGUAAGGG

>N1254  
AUACCCUGACUGACGUUGAACUUGCUAUGUAGACAAGACU  
>N1255  
AGAAUCCUUUUUCUUGAGGACUAGAACUAUGGUAAGUUAU  
>N1256  
CAAAGGAAAUAAGAUGGAAAACUGCAACACAAGGAAGGAAA  
>N1257  
ACCCAGUUUUUAUAGAAUAGACUAUACAUGUGCAUGCACAC  
>N1258  
AACUACCUUUUUGACUGUAAACUAAAGGCUGACAAAGACUA  
>N1259  
UUUUUAUUUGAAGUGAGAACUCUCCCUACUGUGUUUGGU  
>N1260  
GCAUUUCCCUAAUAGUAAAAACUGGAAAAAUGCAAGUUCAU  
>N1261  
GUAACAUC AACUCCUGAGAACUUCAACAAAUAUUUUUUUC  
>N1262  
AGUUGUUGCUCAGGGUUAGGACUUGUGUAGCAUGUCUAUU  
>N1263  
AAUGCAUAGCACAAGUUCAGACUAUUGUUCCAAUCUACAAA  
>N1264  
GUAAGGUACCUGCCACCAAACUUGAUGAUUUGAGUCAAU  
>N1265  
GUCAGUUCUCAAGAGGGAAAACUUGGAUAGUGUCCUGUUA  
>N1266  
CAUAAAACUCUACCAGUAAAACUGCCUCUUAAGUUACCUUU  
>N1267  
UGCUUUUAAGUGGGACUAGAACUUUACAUAUUAAGAACCA  
>N1268  
ACCUCGCAUGUAGCUUUAGGACUUACUCAAGCAACACUACU  
>N1269  
CUUCAAGAGGAGAACUGGAACUCACCAACAUGUGACUUGC  
>N1270  
AUAGCAUUCAGAUGUACAAAACUACAGCAUUCAGAGGUACA  
>N1271  
AGACUGUGUGCAAUGGGGACUAAACACCUUACAUGUAU  
>N1272  
UGCCAACAAAGAUGAAAGGAACUGGGGAUAUGAAAAGCGCC  
>N1273  
UCAGCUAUGUCCUGAGAAGGACUUCCACACAGAGCCUCACU  
>N1274  
CUGUUUAUUGAGCUCUCUAAACUCAGAUGUCAGCAGAAGAA  
>N1275  
UACUUGUUUGUUUGUUUGGAACUUUUAAAAUAAAUAUAAU  
>N1276  
CAGAGGGAAAUCAAGUUAGGACUGAGUUGGAAACUUUCUUC  
>N1277  
GAUGCAAGCCACAGUGAGGAACUGAAUCAGCAUGAUGUCA

>N1278  
GGGUAGCUUUCAGAGGGGACUGGGCCACCAGCUAGGGCU  
>N1279  
GAUUAUCUGGCUAUCCUGAGACUUGCUCUGUACACCACGCU  
>N1280  
AUGUCCUAAAGAAAAGUUGAACUUGAUGGUUAUGUUAUUUU  
>N1281  
CUUUCAGGCAAACUGGCUGGACUAGUAGUUGCAGCAGGCUG  
>N1282  
GAGCGAAGGCUGUGUACUGAACUGUUGACAUUUCCAGAAG  
>N1283  
CCAUAACUGAUUCCUCUGAACUCCUAUGACCUACAACAAC  
>N1284  
AAGGGAUAAAUAACCUCAAGGACUAUAUAUCAUAAAACAUGU  
>N1285  
UGUUACAACUAACGGGUAAGACUUAUCUUAUAACUAAAUG  
>N1286  
AAAUGC UUAUUUAUAGAAACUAUUUAUAACGUUAAUUA  
>N1287  
AUAUGGCAAUUCUUAAGACUCUAGAUUCGAACUCAGGU  
>N1288  
UGGCGUCGAGAAACCCGGGAACUACCAUCACACCAGCGCAA  
>N1289  
UGCACAGGAGUCCUUCUCAGACUUGUGGCCAGAAUGACGG  
>N1290  
AAAGAGUAAGGGGUACAGGACUGGUUAAAGGUUUGCCGUG  
>N1291  
GGUGUUGCCAUCUGCUGUGGACUUGUGUUUAUGCUCUGGUU  
>N1292  
UACUUAAGAGCCACCAAGAGACUACUAGGUUUAAAAAAG  
>N1293  
UUUUCAUCAUUGCAGUAAGAACUCUAACUAGAACAGCAACC  
>N1294  
UUAAGGAAUCUAUGUUGAGAACUCCAGUCCAACUCAUCCA  
>N1295  
AGACGAAGGACAGCGAUGAACUGAGCCGGACAUGAGAAGU  
>N1296  
CAAUGUCACAGCAGGGUAGACUGAUCACAAGUCAGCUAGG  
>N1297  
AAUUUAGUAGGAUCAAAUAGACUAUUAAAUGAUUCUGGACU  
>N1298  
AAGGAAAGUUGACCUGUGAAACUGGUGAAAACAAUCCA  
>N1299  
GGGAACUGUUUAGCUAGUGGACUAUAGACCAAUUCUGUCA  
>N1300  
CUGUCUUGAAGAGAAAGAGGACUUUAUGCAAGAUGGUUUGC  
>N1301  
UAACCUCCACUCUUCACAAGACUCCCCAAGCAAUGCCUUGU

>N1302  
GAGAAGGCUCACUGGGGCAAACUUUUAAAAUCCACCCACUG  
>N1303  
UUUCUAGAAAAUUAUUGUAAAACUGUGAGAAAUGAAAUUUAU  
>N1304  
CUAAGUAGCAGCAGAUAGAAAACUAAAGUAUGUAUUUAAAAA  
>N1305  
AGUACCCGGAUGAAUUUAAGACUUUUUUUUUAAUCAUUUGC  
>N1306  
CGCUGGGCCAACCCUCAUAGACUGCAGGCGUUGGUGGAUAA  
>N1307  
AAGUCUGUUGUAUAAGGUAAAACUCGAAAGUUUAGCAGUGA  
>N1308  
UUGUUGC UUAAGCAGAAAAAACUCACUUGUUUGACCAACAA  
>N1309  
ACUGUUUUUCUAAAAGCCAGACUUGAAAACGUGAGUGUACU  
>N1310  
UAUUGCAACAUGUCCUUUAGACUAUUUCAGGCUAUGCUGGU  
>N1311  
CUUCUGAUAAUGAAGGAAAGACUGACCUUAUCCUAGAACAG  
>N1312  
UGCAACAGGAAAUAGUCUAGACUAGUCCAGAAUAGCUAGC  
>N1313  
AGUGGAGAAAGAAGCAUAGAACUAAAACUACAUAUAGUAAA  
>N1314  
AAGAGGCAAGCAGAGUUUGGACUGUGUGAGUAUGAUGGAAG  
>N1315  
GAGUUAUUUUUCUUUCUGAGACUGAUGUACUUCACUUAUUA  
>N1316  
AAUUUAUGGGAGUGAAAUGGACUUUUCUUACUUGAUGAUUG  
>N1317  
UGCCUCCCUACUGUGAUGGACUAUAUCCUGGCAUUGUAAG  
>N1318  
AAACAAGAGACCCUAUACGAAACUGUGACAAGCAAUACCCAG  
>N1319  
AGUUAGAAACUUGCAUUUAAAACUUUAGGAGCUGCGUCACCG  
>N1320  
GGAGCCAAAACAGACAAGAGACUAGCAAACCAACCUGUGAC  
>N1321  
CUUACAAUUUUACAGCAAAAACUUUACCUGGAUGCUUCCU  
>N1322  
GGCAGGCCUAAUAUAUAUGGACUCUUCAUUGGCACAGCCCA  
>N1323  
CAUGGCUCCAGUUGAUGGAAACUAUUUGGGAAGGAUUAAGA  
>N1324  
CUUUAUUUACAGAACCUAAAACUAGAGUCUGUCAGCCAGAA  
>N1325  
AAUGUAUAAUUUAAAUGAAAACUAGUAUUCUUAUACACCCA

>N1326  
AGGCAUCUGGAGGAGUCCAGACUGAGUAUGGCCAGCAGAAU  
>N1327  
UUAUAUUUUAUUUAGACAAAGACUGAUUUUGUUGCUGAAACA  
>N1328  
GGUAUGUGGCACUGAAACGAACUGGGCAGUAUAAACUCGGA  
>N1329  
AAGCAAAAUUUGUCUCAAACUGCUUUCUGGACAUUGUGA  
>N1330  
UACAGCCAAUAAAUGUUGAACUGUUCAUGAUGGCAACAUI  
>N1331  
GUUUUUUACCCACCUUAGGAACUCAAGGACUUCUGGGAAC  
>N1332  
ACCCGCUAAGCUUGAGCUGGACUUGCCAUIUGGUAGAGCUU  
>N1333  
UUUUUUUCCUUCACUUUAAACUUGUAGGUUAUAGUCAUA  
>N1334  
AUAGUCCUUUAGUUGAAAAACUACUACAGAUUAUUUUUCC  
>N1335  
AAAUGUACUUCUAGAUGAGACUGAAAAUGAUGAAAGUUCU  
>N1336  
AUCCAGCUGCGAGUCCUCAGACUUGAGCACACCCUUGGCUU  
>N1337  
AAUAUUAUUGACCUAACUGGACUUUUUGUUGUCUUAUCAGU  
>N1338  
UCUUCUGUAAUCUCCUAAACUUUUGGCUUGGCUUUAGUG  
>N1339  
AUUCUUCAUCACACUGCUGGACUAUAGAAAUAUCUUGCCA  
>N1340  
UGGGUUUAGCCCUUCCAAAACUUGAUUACUUUAGGUACGU  
>N1341  
AGUAGUUUAUAGUGAAAACAGACUUC CAGUUGUUGUCUUUUC  
>N1342  
AAUAUACAUGCAUUGGAAAGACUGUGUAAAGCUUUUACAUI  
>N1343  
UCAGCUUAUAUUUAAAACAAACUUUACUGAUCCUGAGUUGA  
>N1344  
GGUUCUGCCUAAGAUAGUAAACUGUGAAGUUCUGGGCAAGC  
>N1345  
CAACCAUGCCGCCAGGGGAAACUCUACCGUGUUGUCCAGAU  
>N1346  
UCAGCAGAGACAAAGUAGGAACUCCUGGCUCAAUAGCCAGC  
>N1347  
UACUUUGAGAUUUCAGAAGAACUCCAGCCAUUCCAGUGUC  
>N1348  
UGUUCAGAAAGUUUCCUGGAACUAUUGUUUCCUAUCUUUA  
>N1349  
AUAGACAUUUAGUGCUGUGAACUUCUUCUAGCACCACUUI

>N1350  
UACUUACAUAUUCUUUGAAAGACUUAUUGAGCAAUUUACGUG  
>N1351  
GUUGGUUAGUUCUCUGCGGGACUAACAUAUUAAGGCUCAGGG  
>N1352  
UCCUUUUUAUUUGAUCCAGGACUCUAAUGCAUACAAUGGUG  
>N1353  
AGGAGGGGAUAGGAAGCUGAACUUGGUUGGAAGAAUAGGU  
>N1354  
AUACUUUGACAGAGUAGAAAACUAGUGUUUUGAAUUUUUA  
>N1355  
UUACUGGGCAUUAUCCUGAACUAAUUUUUAUGCUACUCUG  
>N1356  
AAGAGAUUAAAGAGGAUUAGACUUAUUGAAUGUAAAUA  
>N1357  
ACGUUGGAGCUUACUGGUGAACUGGGGUAGCUGAAUUGAUA  
>N1358  
CAGAUGAAGGUCCAGGACGGACUUGCUGGUUUGCAGAGUCC  
>N1359  
GGGACAGUCCUUGGUUCCAAACUAAUUUAUUGGUUGUUCAUU  
>N1360  
CCAUGAAGUACAAACUAGAACUUGACCUGACUCAAGCUGG  
>N1361  
CCAAGGACCUAGCAGUAGAAACUAUGCCAGGUAUCCAGUG  
>N1362  
GCUUUGUGCUUGAAGGAGGGACUUCAGUGCAAAAACAGUGC  
>N1363  
UAUUACUAAAAUAAGCAGACUUUUCUGUGAGGACCUCAA  
>N1364  
UUUAAAAAAUUAUCUAUGGACUCCAAUUUUACUGCCCAUA  
>N1365  
CAGCCGCGCGCAUUAAGAAAACUAACAUAAGCUUUACCAUU  
>N1366  
CUCUCAACACUUCUGUAAGGACUUUGUCACUUACUUUUUG  
>N1367  
UGACCAGCCUCGAAGUGUGAACUUCCUUGGAUUCAAAACAA  
>N1368  
CAAAACAAAACAAAACAGAACUUAAGUUCUGCUGUCC  
>N1369  
UGAUGGACUGAACUUCUGAAACUGUAAGCCAGCCCCAGUGA  
>N1370  
GGCACUGUCUGGGGUCCCGGACUGAGCAAAAAGGAGAAAGU  
>N1371  
UUAAUUAACAUCUAGGGACUUGUAUAUGUGAAAUCAGU  
>N1372  
ACAGUGGGACACCAUUGAAAACUGUUUAGACUUAAGCAA  
>N1373  
GUAGACCAGGUUGGCUUCAACUCACCAGAGAUUCAUAUGC

>N1374  
GUAGUCAAGGAUGACCUUGAACUCCCAGCCAUCCUGCUUCA  
>N1375  
ACAGUUUGUAGUCCCUGAAGACUGAUGCAAAGGCCAGGGGG  
>N1376  
AGAAAGCUUCACGUGGGAAAACUCACAAUAUUUUGAUGCCU  
>N1377  
CAAAGUUGUGGUAACCAAACUGAUAAAGAGGAAUAAUA  
>N1378  
AUCUUAGCUUCUGUUAAGAAACUGUCUGCUUGUGCUACCCU  
>N1379  
AUUCCUAGUCUGAGGGUAAACUGCCUUCUUUGCUCCAAGC  
>N1380  
AAAGAGCAAACAACAAAAACUCCAUGCUGAGGGACUUGA  
>N1381  
GACUUGCGGAUAUUCUUUGAACUGGCUCUCAUUUUUUUCUAU  
>N1382  
UACAGCCCUGGAUAAUCAGACUUGCCCAUGAGGACCAAGU  
>N1383  
UGCAUCAUGGCCACCAGAGACUCUCUUUGCUGGGUUUCUC  
>N1384  
UCACAGAGUUACAUAUGAGAGACUCUGAUUCGAAAACAAAGA  
>N1385  
AGAGUUUGGGUUUUGUUUGAACUGGGGCCUGUGAGUUCACU  
>N1386  
GGCUGGGUGACCAGUCGAGACUCUGUGGUGGCCAAAACUC  
>N1387  
CCUCUAAAUCUACCUAUUAAACUACGUUCCACCUCUCAAGU  
>N1388  
GGAAUAUGGGCCUGUCUAAAACUACCAGACCAAUGGCUCGA  
>N1389  
GGUGUUCUUGUCCCUAGGAGACUACAUUUUUUUCUGGCAUU  
>N1390  
CAACUGUAAUUAUUAUAGAACUGGGUGAGUCGCAGGUCAA  
>N1391  
UGUAAGGUCAGUUUAGUUAACUUCCCAUUUUUUUCUUAAG  
>N1392  
CCUUUCCCUUUUCCCUCAAAAACUCUUUCAUGUGCCAUUGUU  
>N1393  
GCUCUUAUGCUCUGUUGUGAACUUGGAGGCCAUGGGACAAC  
>N1394  
UUUAGCUAUUGUCAGACUAAACUCUUCACCCCAAGGUGGUC  
>N1395  
AAACCCUUAGCAAAAAGGAAACUAAAUGCUGGUAGCUUUGA  
>N1396  
AAGCACAAGUGUUCAUUAACUCGAAGCCUGUGAAGCCC  
>N1397  
AGACUUUCCAGGACUGUGGACUUUAAUGGAUUAGGUUUUU

>N1398  
AUUAUCCAUAUGUAUGGAGACUAGAGGUCAGCCUUGGGUC  
>N1399  
GAAUAUAUGAAUACGUAAAACUAUCACUCCACCUAACAGA  
>N1400  
AUCUGUCCUGUCACCUUGAGACUGCCCCUGUCACUCUAAGA  
>N1401  
CCACCUCUCCAACUCCAGAGACUUUCUUAUGUAAAACUUU  
>N1402  
UACUUUCCUGAACACUUUGGACUUCGUGCUCUUUCUCCU  
>N1403  
GAGGAAGAUGCUCGAUGUGGACUCCUGGCCUCCACAGGUAC  
>N1404  
CCAUCAUGGAGGCAUGAUGAACUUUGUCAAGUGUCCUUUCA  
>N1405  
CUAAAUACAUAUUACAAAAGACUUGGUCCUAGAUGGUGGC  
>N1406  
ACAUGGCCAUUCCACUGGAGACUGUCUGUGGGAUUCUGAUU  
>N1407  
CAAUGCAGGCUCUUUGUGAAACUCGAUACUGUCCCUUCUG  
>N1408  
UCAACGAUUGCUCUAUAGGAACUAGAAAUAUCUGAAACCUG  
>N1409  
AAUUUGAUCCUAAAUCACAAACUACAAAAGUAUAGCACUG  
>N1410  
CCUUUACACCUUUCUAUGGGACUGGCUUCAUGGUGAGCACA  
>N1411  
CAAUGGAACCUAUUCUUCAGACUCACUCCGAGUUGCACAA  
>N1412  
GGAGGCUCACAAGCACUUGAACUCCCAGUUACAUGGGAUCU  
>N1413  
AAAUAAGUUACAAACACAAAACUGUUAAAUAAGAAAAG  
>N1414  
GAGCAGCCAGAACACAGUGGACUUAGCAGCAGCGUGAAAGU  
>N1415  
AAGGUAGCCACUAGGCAAGAACUGUCCUAAUUCAUCUACAG  
>N1416  
AUUUGGUGGUGAGGAAAUAAACUGAGAGGUGGGGAAGUGGC  
>N1417  
AAAAGGGGAUUCUAAACAGAACUUGAGCAUAAAACAUUAGC  
>N1418  
AAAGAUUCCUGAUAGGAAAGACUGAGUAGUGCUGAUCAAAC  
>N1419  
AGAUACAUAUCUUAACUGAAGACUUGCAAUACCAAAGGGGU  
>N1420  
CUUGAUCUUGGAUGCCAUAGACUCCAGAAUUCUAAGAACUU  
>N1421  
UAGGCAAUUGUUGUAAUUGAACUGGACAAGUGUUAUGUGA



>N1422  
UAGGCAAGACUCUUUCUUGGACUAAGUGGGAGUCGCUCCCU  
>N1423  
GACAUCGGCUUAGGAAUGAAACUUAUGCCCAAAGUAGAGU  
>N1424  
GUGCAUUUGUCAUUUGGGGGACUUGUCCGAGCUGAUCUGAA  
>N1425  
AAAGAAGCAGAGUGAGAUGAACUAGUUCUUGUGGUUAUCUU  
>N1426  
CUUUGGCCAUUCUUACACAAACUCUGGAAUUGUCACUAGUG  
>N1427  
UAGCUGUCUGUCAUAUUAAAACUUGGCAAGUCUCACGGCUG  
>N1428  
UAUAGGCACAAUUGUCUUAGACUCCAUAUCUCUAGAACUG  
>N1429  
CAAGUUCAAGACCAGCCUGGACUACACAGUAACAGGUCAAC  
>N1430  
GAAGAGAGAAUAGGGAAGAAACUUCUCCAGCCAGGGGAAG  
>N1431  
GUCUGGCGCAUCACAGUGAAACUGGUCUCUUAGGGCCAGUG  
>N1432  
UUGUGUGCAUAGUUUGUGGGACUCAGUGUUCUUCUACACGU  
>N1433  
AAGUGUUGUUCUGGUGAGGGACUGGGCCAAUCUCCCACGCU  
>N1434  
GGCUGCUGAACCAGAGGUGAACUCGCUCUUGACACAGCAGC  
>N1435  
UAAAAAAGCAGAGCUAAUAGACUGUAUACACACAUGUAC  
>N1436  
GAGAAUGCCAAAUAAAACAAACUCUACAAUGCCCUGCUCUU  
>N1437  
GAAUCUGUGGUUUCUAGAGACUGCAGUACUCCUAUAUAGG  
>N1438  
ACCUAAAAUUUAUCUGGAAACUUCUUGAACAAAGUGAAA  
>N1439  
AACCUAAAUCCAUGCCAGACUCUUUGGUUUUGUUCAUUU  
>N1440  
UGACUCCCGGCUGUAGUAGGACUACAGACCUCAACAUGGCU  
>N1441  
UAAUGGACCAUCCUAGUAGGACUAUAGAAAACAUAUCAUGCU  
>N1442  
CAUAGCACUGAAAAAAGAAACUGAACAUAGACAGUCAUAG  
>N1443  
GGUCUCUGUCGGGGUUGAAGACUAGAUAGUUAUAGUCUUAG  
>N1444  
GGAGCCUCACCUUGAGCAGGACUCUACUUUGGGCCUGUCAC  
>N1445  
GGGAAUGGGCGCUGAAUUAAACUCCAUCUCCCUGAGUUGC

>N1446  
CUUUCUCAGAGAAGGAAGAGACUGAGUCCUUUCAUGUGACC  
>N1447  
AAAAGAGUUUAAAAAAAAAAGACUGAGGUAGUGAGGUAGGAC  
>N1448  
UAAAUCCUAUGUGCAAACAGACUUGGAGAAGCACCAUUUAA  
>N1449  
AAUGGAGGAUGUGGCCACAGACUAAUUCAACUGACUUCUUG  
>N1450  
GACAGUUUAUAAGGCUUUGAACUGUAACCAAUUGCCUUGGU  
>N1451  
GGAGCUUAUAUUAGAAAUGGACUUGCAAUAACCCUUCAAG  
>N1452  
AAACAUCUUAGUAAUGGCAAACUGUUUCCUUUCUCCAGAU  
>N1453  
CUGUUAGUUAAAUGGUUUGAACUUCUUUGGAAUUUGCUCUU  
>N1454  
CUUCCCUAUCUCCUGCUAAGACUUUGUUUGCAUCCUUCUUU  
>N1455  
AUAACUUUGACCAUGUUUAAACUCGAUCCUUUUCAAAUGA  
>N1456  
CAUUAUAAAUCCCUUAGAGACUAAGCCAAGCUUUGUCAGC  
>N1457  
GAAAUUUUACUGUUUGUAAACUAGCCAGAAUGGAAGCUGC  
>N1458  
GAGCAGCUCAUGUGCUGCAAACUGAGGAGAAGGCUGUCAUU  
>N1459  
UAUAAAAUGUAGUCUCUUAACUCUUGAUUUUUUGGGCAAUA  
>N1460  
CAGGCAAUCUUAGAAGAGAGACUUGUGUAACAGCCCAACA  
>N1461  
CAGGGCCCUCUGUCAGUUGGACUUUCUUUUUUUAUUUUUAU  
>N1462  
ACUUGGUUUCUUAUGUCAGGACUAUGGCUGUAGGACUUGCA  
>N1463  
CAAGUCUUUGCUGCCAGGAAACUCCUGUCAGGAAUCUAAU  
>N1464  
GACGUCACAGAGAUGCAAGGACUCCACAGAAGGGUGUUCAC  
>N1465  
CAAUUUGGUUUUUUAUUUUAGACUUGCUUAUGUUACUGGGAU  
>N1466  
CAUAAACGUCUCUAAUACAGACUCGCAGCAUCCACAAACA  
>N1467  
GUCUUGUUUAUCUAAUUUAAACUCCUCCUCUGUCCAUAUUU  
>N1468  
GUCAGAGGUAGAGAACAGGAACUAUCAGAAGGAUACUCAA  
>N1469  
UCUCCCAUUGCUGACAGAAACUUUUCGAUGCUGUUAUAAC

>N1470  
UCCUACUCCUGUGGCCAUGAACUCCUUGCCACGUUAGGCUA  
>N1471  
GAAGGAAGGACCAUCCAGGGACUGCCCCCGGGGGGAUCCA  
>N1472  
UACCCCCAGAGUUCCCAGGGACUAAACCACCAAGCAAAGAG  
>N1473  
AGUUUCCUACUGAACCUGAGACUCAUCAUGAGCAAGACUG  
>N1474  
GUUUCUCAGGUUCCAGAGAACUCUUAUGAGUUCUGUGGGG  
>N1475  
AGCACACAGGGUAAGUAGGGACUGCAUGGGGACAGAGUCAC  
>N1476  
CUAACAGACAACAUAAAAAAACUCAAUCAACAAGAACCAGG  
>N1477  
CCUCCAUGGACUAAAGCUGGACUUCAACAACAACAGCAGAA  
>N1478  
ACGCUAGCUUUGCUAUAAAAACUCACUUAACUGUUAAGAG  
>N1479  
AAUGAACAGGCCACACCCGGACUGAAGGAGUCUGAUGACUC  
>N1480  
AAAAGUCACCUCACAGGUGGACUCAGAAGUAUAGCCUAAAG  
>N1481  
GCAAUGUGUUCUUACAAGGACUGUUUCACCAUCAGGGGCU  
>N1482  
UCAGACAAGGUCAGAGAAGGACUGAGCUGGACUCUGCUAGC  
>N1483  
AAGUUACACAGCCCCUGAAGACUGUGCUGUUCUCUCCAGAG  
>N1484  
ACAUCUCCAAGUCAACUUGGACUUCACUUUCAUAGCCUCUU  
>N1485  
AGACAGCUUGAAUUUUUAAAACUGCAAGCAUUUUUAAAAU  
>N1486  
CUGAUCUUUGAUGUGGUAAGACUGCAGCUGUUCACCCAACA  
>N1487  
UUAAGAGCAGCCUCCAGAGACUGGCCAGGAGGCAAGUUGU  
>N1488  
AGAUUCAAGGGAUGGCAAAACUUUCCUCCUCCUCUAGU  
>N1489  
GAUCAACAAGACCCACACAGACUGUGGGGAGAAGGAACUAC  
>N1490  
CAUUUUGGUUUGCCUAUCAGACUGCGAUCUUGCAGACAGCA  
>N1491  
UGAAAACAGGAAGGCACUAGACUUAUUCAAAUCAUCCAUCU  
>N1492  
AGCUCUCUACAGUGAUGGAGACUAGAGACAAGCUACUAUGG  
>N1493  
UGCUUUUUAAAAAGCCCAAACUCAGUUUAAUGUACUCAGC

>N1494  
UAAACUGUGUGUUGAAAAAGACUACGAUAUGCUGGUUAAAA  
>N1495  
CUGGCUUAGAAAAAAAUAGACUUUUUGGUGUGAAUAUUUC  
>N1496  
CAGGGCAACUAAGAAAUAAAACUGAAGUAAUAGAAUUACU  
>N1497  
ACUGAGUGCACCCAACACAAAACUGUUUAAACUAUUUAGAAC  
>N1498  
GGGACAGGGAGAUGAUGGGACUGGGGUUAUAUCAUACAAAA  
>N1499  
CUGGGGUACUGAGGACUGAGACUCUCCUAUGUGGGGGUGGA  
>N1500  
ACUUGAGUCAGAAGGAAGAGACUAUUUAUUCUCAAUUGCUC  
>N1501  
AAAGCUGCAGGAGAGACUGAACUUUCAAGCCAUCUAUCAUA  
>N1502  
GGAAGCUGGCACUUGCUCAGACUAAAACACAGACAAGGACA  
>N1503  
AGAACGGAAGAAAGGGAGAAACUUUAUUUUUCAUGUUAA  
>N1504  
CUUUAUUUUUCAUGUUAAACUUUCUAGUAUUGUUCAUAU  
>N1505  
ACAUCUGAGAACUAAGUGAGACUCAGUCUUUGAAUGUUGGA  
>N1506  
UUAAGAUUUUGUGAUCAAAAACUAGAGAAAAGUAACUUAAA  
>N1507  
AGCAUGGAUGCUUCUGCAGGACUUGGGUAAUGGGGUGAAGA  
>N1508  
ACCUAGAUGCUGAGGAUUAAAACUCAGGUCUGCAAGCUUGGG  
>N1509  
GGCAGGACUACUGGAUUAAGACUCUGUCUAAAAACAACAA  
>N1510  
UGCCUUCCCAACUGUGAUGGACUCAAGCCUCCAACCUGCAU  
>N1511  
UAAGGUAUCGUUCACUAGGGACUUUUACUCCCUAUGACCCU  
>N1512  
CUAGAGAUAAUGACUCUAAGACUGAAUUAUAUGAAUAAA  
>N1513  
UACAUCUCUGCCUACACAGAACUGGGGUUGCAAGUGUGUAC  
>N1514  
UGUCACAGUGAGAGGCAGAAAACUGUGGUUAGUAGAGCUCCA  
>N1515  
CCAACAACAACAAGAAGCAAACUAACAGAUAAAGCCAUCUC  
>N1516  
CAUACAUUAAAAAAGAAGAACUGUGGGUUAGAAAUGUUUA  
>N1517  
CAGGAAGGGGCAGGAAGUGAACUUUUGUAGUUCUAGAAUGA

>N1518  
CCGUGAGCCUUCUGAGAGAAACUCCUGAAGCAUCUACAUA  
>N1519  
GUAGCCCAGGCUAUCCUCAAACUCGCUAUCCUCCUGCUCCU  
>N1520  
ACUUUAUCUGCAAUGAUCAAACUACUUCAGUGCUUCAAGAC  
>N1521  
CCUCACUUAGCAACAUCCGAACUGAGUGUCCAUCACUAGG  
>N1522  
GGACUGAACCAUGUUGUAAGACUUGGCAGUAAGUCCCUUA  
>N1523  
GAGGGGUCAAGUACACCAGAACUCAACCCACAAAGAUAAC  
>N1524  
AUACCAGACAAUGCGAUGGGACUGAGUACACACCACAACGC  
>N1525  
UAGGUGCUGGAGUUUGGAGGACUCACACUGAACACACCACU  
>N1526  
AUAGAAGCAGAAGCAGGCAGACUGUCACAGGCUCAAGAUCU  
>N1527  
UAUUGGGUCCCGGGGAUGGAACUGAGCACCACUCAUGCC  
>N1528  
CAGGACCCUUUUUCAUGGAGACUGUAUCCUAGAUGAGAGGA  
>N1529  
ACCUGGGUGCUAGCAAUUGAACUUGGCAAUGUGUAAGUGGU  
>N1530  
AAAAAGAAAAAGAAAAAGACUAUAGGAUAUUUAGUUACA  
>N1531  
AUUUUUAAAAAGGUUACAGACUACAGCGAGGCUCCUGUG  
>N1532  
GUAUGCAGUGACAGCCAGAGACUCGCUUGGACCUGCAGAGAG  
>N1533  
CCUGCUUGGCUCACCAAGAAACUCUGCUAGGAAUCAACCC  
>N1534  
AUCUCACGUGAUCAUUAAGGACUAAAGAGCAGAGUGGGGUG  
>N1535  
GUAGAACAAGUUGCUGACAGACUGGUGAAUGGAUGAGUGAC  
>N1536  
AAUCUGAUGGCUAACAGAAGACUUGUCCAGUGUCUACUGG  
>N1537  
CUUGUCCAGUGUCUACUGGACUGCGUUUAUACUCAUUUA  
>N1538  
ACAUGGCUUGCACUAGGGGAACUCCUCCUCCCUUUCU  
>N1539  
UAUAUAUGCAUAUACUAAAAACUCAACCCUGCCCCAUGUA  
>N1540  
CAUAACAACAUUUUUGGAAGACUCAUUAAGCAAACAUUUUU  
>N1541  
GGAACUGGAAAGGUGGAGGAACUCAGCUGAGAACCAGCAUC

>N1542  
AAGACUGUGACAUCUCCAAACUUC CCCAAACAAAACCACC  
>N1543  
UUUUCUUCUCCCAGCAUGAAACUCCAGGAGAAAUCUUGGUC  
>N1544  
UUAGAUUUAGCAGAAAUGAAACUCUGUAAGUUCAAAUAGUU  
>N1545  
UGGCCUGGGCUGGGCACUGGACUACA UAAAAGUAGAGGAUG  
>N1546  
AGACUCACGGGAAUGACUGAACUCAAUACGUUUACUGAUG  
>N1547  
AACCCAGACUUUUGUGAAGAACUUCACUCUCAGUACCUGAC  
>N1548  
UGCAGAUUCUGUGUCUGUAAGACUCUUAAGUGUGAGUGCAUG  
>N1549  
CUCAGAUACUAACAAAUGGACUCCAGGGUGAGUCAAAAUG  
>N1550  
AGCUGUAUCGGGAGGGUGGGACUGGGCUUCUGAGAGCACUG  
>N1551  
AACGGUUAGCCAGAAGCAGAACUACAGAAGCCAAAAGCAA  
>N1552  
AGCAUAGUAGAGACAUCAGGACUGGGGGAAUGGAAUGGGGA  
>N1553  
GAGCCUCCACCCAGCUUAGACUGUCUGACUUUCCUCCUG  
>N1554  
UCCCCGGUUUCCCUUCAAGAACUCCCCUUAUCCCAUCCUCC  
>N1555  
AUUAUAAAAGAACCCAAGAAACUAGAUUUAAAAACUAAA  
>N1556  
AUGAAUUGGCUUAGGAAGAAACUCCGCUAUAUUCAGGACA  
>N1557  
AAACAGGUGAAGGAAAUAAAACUAUGCAAGACCUGAAAGUU  
>N1558  
UUUUCAGGUAAAUGAAUGAAACUUAAGAAUAUCAUCUGAG  
>N1559  
GUGUGUCUAGCCUCGAAAAGACUUGAAGUGCCAGGGGAGGG  
>N1560  
CAGCCACAUUAAGAGGAAAGACUUAGCUGGUCUUGUGACAA  
>N1561  
CAUGUGGAAAUAAACCAGAAACUACAGUCAGUGUGAGAUAC  
>N1562  
CACUGUAAAACUUCAUGUGAACUUGGUAGCAUGGAAAUAAG  
>N1563  
AGGGCCUUUUUAUUCAUGGAGACUCCUCCUGUCCAGGUUAG  
>N1564  
CCCAGAAUCCAAACAUAACUAUCUUCAGUUGGCAAAAU  
>N1565  
UUCAACUGUGCCAGGCUGGGACUGGGACACUGAAUAUUAUA

>N1566  
ACCCACUGAGCGGUCUAGAACUAAAUACUCAAUAAACUUA  
>N1567  
GAAGAAAGAAGUUUUGAGGAACUAGUGUUUUGC AAAAGUAC  
>N1568  
CGCUAAUUCUGAUGAAGAAGACUUCGCUAUCAGCCUGUGCC  
>N1569  
GCAGUGGGAAGGUAUGUCAGACUCUGGCUUCCUUCUGUUGU  
>N1570  
AAUACACUUUAUUGUAAUGAACUCAAAUGAAAAUAUCACAC  
>N1571  
GAGAGGAUUUAAAACCAUAAAACUCGACUAUAUAAUGUAAGG  
>N1572  
AGGCCUACUGGUACUACAAGACUAUGAUGCAGCCUAAGAAA  
>N1573  
UAUGAAUAGAGCAGCAGGGAACUUGGUUGAGUAAGUGUCUC  
>N1574  
AUGUUCUUGUAUCUGUUUAGACUUGC UUUGUGUCCAAGUAU  
>N1575  
GGCCUUUCUGGGGUUAAAAGACUGCUUUGAGAAGCCAGGUG  
>N1576  
UCCUCCUCCUAUAUCUGGAACUCAAACAGUCUCACAGUUU  
>N1577  
AAAACUCUGGCCCCACAGGAACUGCAGGGCUUCUAUAAACC  
>N1578  
AGCAGAGAGAAUGACCUAGGACUCAGCAGGACGCUUAGACU  
>N1579  
AGCCACUCCUCUGUAUGGGACUGAAGAGUAAAGUGCUCUG  
>N1580  
UUUUACAACACAAACAUA AAAACUCUGGAAGUCUUUGAUAGC  
>N1581  
AACAUCCCAGAUGUGUCAGGACUGUCCUGUGACCAAGUCAC  
>N1582  
AUGUGGGUACUGGGAGCAGAACUCAGUCUUCUGGAAGAGCA  
>N1583  
GCUUAAGUCACAAGGAUGGGACUCAUCUCACCACUGAACCA  
>N1584  
CAAUGUGUAACAAAGAAAAGACUGCCAGCCCCAUGGCGUGA  
>N1585  
CUGCCAGCCCCAUGGCGUGAACUGUGACCUGGGUUGGAAUG  
>N1586  
AAUCCAGGAACCUCACUGGGACUCCUCUCGGAUAUCCUGUU  
>N1587  
CAGUCUUACAACAUAAGUAGGACUCUUGAUCUGCUUUAUGAA  
>N1588  
CUUCACAGAGCCUUAGCAGAACUUAGUCCCAAGACAUAGCU  
>N1589  
AGGUAGAUCAAUGGAAUAGAACUGAAGACCCAGAAAUAUAC

>N1590  
CCAUCUCAAAAACCCUCAAACUGAAUGCCCCUCCUUCUC  
>N1591  
GAGGUUAGAGGCAGUUGUGAACUAUCCCAAUAGGUACUGG  
>N1592  
AACGGAAGGGAUGCCUACAGACUUCUACUUCUGGACCCUCA  
>N1593  
UAAAAAAUUAUCA AUGUAAAACUGCUCACAGUUGCACCUAU  
>N1594  
UUUUAUGGAAAAAAUCAAGACUGUGUUACAGGACAUUUAA  
>N1595  
AGUACUCUCUACCAGUCAGGACUCUGAUUACCUGCUCUGGA  
>N1596  
ACAUAAGCAAUCUCAUGAGAACUUGAUGCCAUGAUUCAUA  
>N1597  
CAGGCAGAGGAUACCCUUGAACUAGAGUUUCAUGUGAUUCC  
>N1598  
GUUGGGGCCACUUCAUCAAACUGUCACAGAGCCUAUGUUU  
>N1599  
AUGCCAGUCCAGGUAGCAGGACUGCAUUCAGAGUUGAUUCU  
>N1600  
GCCAACCUCAGAGCUGUAAAACUUAAAAAAAUUCAGAAAG  
>N1601  
UAGGUAAUGAGGUGGCAAGGACUUCCCUUGUCUGUAGGUGG  
>N1602  
AGCUAAGCUCUAAGAAAGGGACUAUUUUUGGCCAUUCUCAU  
>N1603  
UCUGACAAAGGAGAACACAGACUGUGGUGAACCCUGAUUCA  
>N1604  
UGCCAAAACGGUCAUGAAGAACUCCUGUGUAAAAGCCAUUA  
>N1605  
GAGAAAGGAAAGAACAAAAACUCAGAGCGGGGGGAGAAAG  
>N1606  
UACUGAAGCAAACAUGAAAGACUGUUUUUCUGAAGCAGACA  
>N1607  
UUUCAGAGGGAAGAUUAAAGACUCUUUUUCAGGGCCAUUGCU  
>N1608  
AUCUCCCUAUUGGUACACAGACUGUUUGGUGAGUGUCCGAU  
>N1609  
UCUGCAAGACAAGUCCAAAAACUUGGCUGCAGUCCUAAGGC  
>N1610  
GACAUCCUCAGACUGCUUGGACUGGUUUCACAGAUUCUCC  
>N1611  
UCCGCGUCCAGGACGCUCAGACUUGGGAUUCAAUCUAAGA  
>N1612  
CAUUCUGGACACCGCCACGGACUCUGACAUCGGCUCCAACG  
>N1613  
GACUCUUGUAGGCAAGCUAGACUAUGAAGCAACCUCAGCCU



>N1614  
CUUUCUGGCCAAAAAGUUGGACUUUGAGACACAGUCUUUUAU  
>N1615  
GCAAUAUGUCGAAAAGGGAACUUCAGGCCUUAUUCAGGCU  
>N1616  
UACUGUAAAUGCCUUUUGAAACUCCUGCAGUAUUUGGGCAU  
>N1617  
GGCCUGAGAGCCGCCUGAGACUAGCAUGUAAGAUGGACUG  
>N1618  
AAUAAGUUGGGAGCUGUGAACUACAAAUGUAGUCAGAGUG  
>N1619  
AUUCAAGCUUCAGAUACAAAACUCUCUGAACUAAGUCAAUU  
>N1620  
AAUGUCUAGUUCUAUAGAAAACUUGGCAUUCAGUCAGAAUG  
>N1621  
AUUUAUGAGUUGUGAAGUAAACUUAUUGCAUUUCAACAGAU  
>N1622  
AGUGAUUCCAUCUUGGGCAGACUUUAGAAGAGAAAUUGUUC  
>N1623  
UCUUAGGAGAAUUCUGGAAACUAUAGUUUUUAAGGUAUUC  
>N1624  
CUAUCUUUUGCUGUUGAGGGACUCUUGAUUUGAGAUUUGUG  
>N1625  
UUUAAAAGCAAACUAAAAGAACUGAAAAUGCACAUGCUCUCC  
>N1626  
ACAGGGUAAGCUUUGCCCAGACUCAUGACAACAGAAUUCCC  
>N1627  
AUACAUCUUUUCUUCUGAAAACUUUACUUAUGUAGGGAAAC  
>N1628  
CAGGAUUUAUUUUUUUUUAAACUAUGGUUAAAUGGUUCAUA  
>N1629  
GCAGCCACAGAGAUACAGAAACUGUAAGCACCAAUCUCUU  
>N1630  
AACAAAUGUAUAGCUUAGGACUAUUGUAGCAACAUGUUGG  
>N1631  
GGCCUAGUGAAAGGAUCAGGACUUUCCCAAGCCAUACAGCC  
>N1632  
GCUCUUGGAAGAGCUUAUAAACUCUAGUAUCUGCUGGAAGA  
>N1633  
UGAGACAUCAGAGACAAUAAACUUUAUGCUGAUCUCCCAG  
>N1634  
UUGGUGAAUAUUUAUUAUAAACUUAGAUGUUACAUGAAAG  
>N1635  
CUGGGCAGUGGGACGUACAAACUGACCACCAUGAAGAAGGU  
>N1636  
ACCCUUGCUCUAGGUGUUGGACUCCCUCUACCUUGGGCUAU  
>N1637  
GCUUUGAGGAUAGGUGUUGAACUGUGAGGCUCAUUCUCAA

>N1638  
AAGCAUGUUACUGCAUUUGGACUCUAACAUGGUCAUUUAUUA  
>N1639  
AAAAAAAAAUGAGCAAAGUGGACUCAGAGAGCAGCUGUACUG  
>N1640  
UGUGGGUGUUGGGGAUUUGAACUCAGGUCCUCUUGCCUAUA  
>N1641  
UUCAUUUUUUAAAAAUGAAACUUAGUGAUUUAAACAUGCUU  
>N1642  
AGUUGGCGCAUCGCUGAGAAACUCUUGGGUGUCUGUGAGGG  
>N1643  
AAAUGCUUGUGAACAAACAAGACUAAUGAGAAGCAGAAUCCU  
>N1644  
GUAGAGUGCUGGGGAUGAGACUCAAAUAAGAAGGAGUUGUU  
>N1645  
UGCUCAUUAACCAUGACCAAACUCUUGGGAAAGUCUUUUCA  
>N1646  
CCAAAGAACUUCACCAAAGAACUUCUCAUAGUGUUCUGGCU  
>N1647  
UAUCACCGUUUCCUAUUAAACUUUCUUCUCCCUACCUUU  
>N1648  
GUUGAUUAUUCUAUUGGAACUCUCUAUCGUAUGUGUAAA  
>N1649  
CUAGUUUGGAAUAAUUGAAAACUGAAUAAUACAGCAAAAUG  
>N1650  
GAAUAUUCUGUAGCCAUAACUCUAAAACUGUAAGACCCCA  
>N1651  
GGUUUAUGAUCCAAGCCCAGACUGUAAUAUCGGGCACAUCU  
>N1652  
CCAAGGAAGUCAGGACUGGAACUCAAGCAGGUCAGAAAGCA  
>N1653  
UGCUGCAUGGGGAGGUAAGAACUGAAGAGACAUUUAUCCA  
>N1654  
CAGGCAAGACAAAGUAAAGGACUCAUUGAAUCUGGUUCAAU  
>N1655  
UUUAGUUUUGUGAAACAGAAACUGGGUUUUCUCCUCCACA  
>N1656  
UUCACAACACUGCCAACAAGACUGCCGAGCAGAGGGACAAC  
>N1657  
AAGGAGGACAUGCACUCUGGACUAUUGGGCUCUAGGCUGGU  
>N1658  
CUCUGGGAAGAAAAGAAGAGACUCCUAUACUUUGACCAAGU  
>N1659  
UAACUGAUUUGAAACUUCAGACUCAAAAUCUGAAGAUGUGU  
>N1660  
AUAUCUAUAAAGUGAACUGGACUUUUUCUUUUUUGUGAUGA  
>N1661  
AUAUACUAUUGGCCUAGAAACUAAGGCAUAACUAAAUGUU

>N1662  
AAGCUGAGAAGGUGAGAGAGACUGUCACAGGAAGGUCACGC  
>N1663  
GGGGAAGGCAGGAAAAGAGGACUUGAGAAAUCAGAAUAGCA  
>N1664  
GUGGAUGAACAAAGGAACAAACUGCAAAGAAGACUAUGUGC  
>N1665  
AUCAGUUGGCUGGACCAGGGACUAGAGAGAUGGCUCAGUGG  
>N1666  
CAAAGUAGAGGCAGUGAGGAACUCUGUCUCAAGAAUAAAGG  
>N1667  
UUUCAUUUGUGGUCAUCCAAACUAGAGUUAAGCAAGGUGUC  
>N1668  
CAUAAUGAAGGGAGAAACAGACUUGAAGACUAGUGUAGAAA  
>N1669  
UAUCUGGUCAGUCCUCAAAAACUGUGAUUUCUGAAAAACA  
>N1670  
CCCUCAAAGAAAGAAACCAAACUAUCACUGGCCUUUAAAAU  
>N1671  
AAGCCAUGACCAUCGUGAAAACUGCGCAGGUGCACCAUGAU  
>N1672  
UCAUGAAUUAUACUGGGGAGACUCAGUAAAACUAGGAAAA  
>N1673  
UCCUUCAUCUCCCCCAGAACUCCCAUUAUCAUCUCCUCC  
>N1674  
CUUUGUGAGUUUGUGGCCAGACUUAUUUACACAGAGACCUA  
>N1675  
AGGCACCUGAUGAACAUUAGACUCUCAGCUUUCAUUAUACC  
>N1676  
UACUAAUGUGUGUGUAAAGGACUUCCCAUGCACAAGGGCC  
>N1677  
AGCAGCAUUAUCAUCACAGAACUAAAUGAGGUUUUGUUGC  
>N1678  
AGGACCUUCAUUGGACUGGAACUUCUAUAAGUAGGUUGACU  
>N1679  
CAGGGUUUUUACUGCUGUGAACUGUCCCGAAGAGCUGUUGA  
>N1680  
GCCAAAACCAACCAACAAAACUGAACAUCCACUAUUUUCU  
>N1681  
UACAGAAUGGUUUUUAUAGGACUAUUUUGGAUUUAAAGUAU  
>N1682  
CUUGAAGAUGCCCCCUGGGACUUCAUCCAGGUGGAGAGGG  
>N1683  
AUUGUUCUGUUUGGUCUCAACUAACUGACAAUUGUUUUA  
>N1684  
AAUUUUACUAAAUAUAAAGGACUCAUCAUAUUCUAAUUCAU  
>N1685  
CAGUCUUGACAGGGACAAAGACUAGAUGGCUUUUGGAGUCU

>N1686  
AUCUAAAAGAAAGAAGCCAGACUGAGAAAGACACAUAGGCU  
>N1687  
AAAUACGGGAUUUAUUGGAAACUUUCCAAUAAAUAUAAGAU  
>N1688  
GCCAGAAUUUAAAACAAUAGACUCAAAUAUUGGAGUUUCAG  
>N1689  
UACGAGGAUGUCCUUGUGAAACUCGGUGGCAUUAUGACAAU  
>N1690  
AACGUUGACUUUGGUAAGAGACUACAGUGAUUUUAUAUAAU  
>N1691  
CCAAAAGAAUUUACUUUAAAACUUCUCUAUUUUUUUGGAU  
>N1692  
GUCUGAGCCUCAUUUCAUAAAACUUCAUCAUUCUGUCAGAGA  
>N1693  
GAUUUCAUUUAAAUCUAAAACUCACUGACAAGGAGAGGAG  
>N1694  
AUAGUAGUUUGGAAAAGGGGACUAAGUACACUGAUGC UUUA  
>N1695  
UGGGGAUGGGAGUUUUAGGACUUCAGGGUGACAAGGUGAU  
>N1696  
GCUCACACCACACACACAAAACUCACAGAACUUAACACUGU  
>N1697  
AUGGAUCCUAACACAUGAAAACUGCCUCUCCAGAGCUUCCU  
>N1698  
GUUCUCCUUUACCUUGUGGGACUUUGACACCAGCUAUGGCA  
>N1699  
UGAGCUUUUCCUGGGCAAGACUGUUUCUCCCAUUCUCAGC  
>N1700  
CCUUAAAAGCAUUUGGAAAACUAAAAAUGUUAGUGAAGUU  
>N1701  
AUGUCUGUUCUUGAGAAGGAACUUGUGCUCAUUAUACAUUUU  
>N1702  
AAAGUUAUAGCGUCUACCGAACUCCCCAGCACAGUGUGCGA  
>N1703  
ACACACAAGCUCAGGCACAGACUCCUACUGUCUGCUGCAA  
>N1704  
CUCUACCUCUGUCUGUGGGAACUAAUUCUACACUGCCUGUC  
>N1705  
UCUAUAGUGGGAGCCUAAGAACUGAAAACAAGAUCAUUAAA  
>N1706  
AACUCAUGAGCCUCAGCAGAACUGACACACUCCAAUCUCUA  
>N1707  
UUCCUCUUUCAGCUGAAGAACUGAUUCAUUUCUUUUGUUA  
>N1708  
AAUUGCGUGAGCUAUUGAAAACUGUGUUCUAAGCACAAACU  
>N1709  
GGUUCUUAUAUAUUGAGAAAACUUUAAUGUUGCUAGGUUUU

>N1710  
AAUAUUGUCCAAAAACAUGGACUAAAGCAAAAUGAAGCCU  
>N1711  
UAGGAAGCUUUCAAAUAUAAAACUGACAUGUUAUAACCAGA  
>N1712  
AGUCUGCUAACUGCAUAUAAAACUGUUGUCUGCAUAAACCUG  
>N1713  
AGUGUUUUUAGAAAGCCAGAACUGGCUCCACCCUCUAUUG  
>N1714  
UCUUUCCCUUCUGUUUUUGGACUGAACAAAUUCAUAGUCU  
>N1715  
UCACUACAUACUUGGGCAAGACUUUAAAAUUGAGGUGGUGG  
>N1716  
CUGUAAAAGAGGCGUUAGAAACUAAGAAAAUCUUUUCauc  
>N1717  
AGGGAGCAGUGUUCGGAGAACUAAUUUCUGUAACAUCAG  
>N1718  
GCAUGGUGGCAAUUUGAGGAACUCCACUGUUGCCAACUACA  
>N1719  
CUAAUGCACAUAGGACAGAGACUAAAAGAAAGCUUCCACA  
>N1720  
AGCCAACAUCAUUGCUGAGGACUCUCUUCAUUUCUCUCAGA  
>N1721  
AUUCCGUACUUAUGUAAGACUGAGCAAUUAUAACACUU  
>N1722  
CAUGGAAAAAUGGAUAAGGACUUGAAGUGAUCUCAUAAA  
>N1723  
AGUUUUAGAUCCAUCUAAGACUGAGUAGAUCACAAUCCAC  
>N1724  
AAGAUCAUGUUCGUGUUUAGACUAGAAACCAAAGCCACAUU  
>N1725  
UAAUAUUACAAUCUAGUGGGACUUAUAGUUGUACAUUUU  
>N1726  
AUCAUCUUGGUUAAAUCAAACUGAAAAACUAAUAAAUAU  
>N1727  
CACUCAGUUGGCCGCACAAGACUAUGUCACCACAUACAGUA  
>N1728  
GAUCUUCUAAAUUCACCAAAACUGUGAUCUGAGCAUUAGCU  
>N1729  
AAAUCAAGUCCAUUUUACAAACUACAAAACAUUAGCAGUUC  
>N1730  
GUUAGAAAUGAUGAGGUAGAACUCUGCUUUUUCUACAUCU  
>N1731  
AUAGAUAACCCUAGCUAGACUCACUAGAGGGUACAGGGA  
>N1732  
AGCAUUUUUAUGACAUUGAACUUGGUCUAAGACACAUCAC  
>N1733  
CAUCCUACCCAUAGUGCCAAACUGAGGCUGGCUGUAAUGUC

>N1734  
CAAUCCACAGACCCAAGGAAACUAAGAAAUAAAAGGAGGCCU  
>N1735  
UGUGGGUGGACAUCUCUGAGACUAUCUGGAGAUCUGGGACU  
>N1736  
GCCCAAGGGGACUCACAAAAACUAAACCACCAAUCAAGAG  
>N1737  
ACAUUUUUUUGAACUGGCAAACUAAAAUAAAAUUGCUUCUA  
>N1738  
UGUAUCCUGUUGCUCUAGAGACUGAAAUUGUCUCCUAGGG  
>N1739  
GAAAACAGGAAGAUUCCAAACUAGACAUCAGUAACUAAUU  
>N1740  
GAAGUGACCAUGGAGCGGAGACUCAGUCCCAUGGGACUGU  
>N1741  
CUGUGGCUUUAACUGGAGAAACUCUACCUUGUAAAUUGUUU  
>N1742  
UACUCAAUAAAAUCCCGCAAACUGAAUCCAAGAACACAUCA  
>N1743  
GUACAAAUUUUUAUCCCAAACUUGGACACUAGAAUCAGGA  
>N1744  
CCCUGCUCUAGUCGUUCAGGACUCACAUGAAGGCCAAGCUU  
>N1745  
CCCAGGAGUGUAUAACUGAAACUUGAGGCAGAAGAACUAUU  
>N1746  
GGAUUGUAUUGAAUCUGUAGACUGAUCCUGCUAGACGUUUA  
>N1747  
UGCAUUUCAUCAUGUUUGAGACUUUAAAAGAAUUGCACAAGU  
>N1748  
CAUAGAUGUUCAGAAUUGAGACUUUCUCUUGGUGAAUUUUC  
>N1749  
UAUUGGAUAUUAGGAUGGAAACUUCUGCUUGUUUCCUGGGA  
>N1750  
GAAAUUCCCAAACAACUGAGACUAUUGCCAAGACAAUGGUU  
>N1751  
AACUAUUUGGAUAUGAGUGAACUUCUUUAGAAAUUGUUCUU  
>N1752  
AUGUUUGUGCAGGAAUAGAAACUCUGACUUAGACAAAUUGG  
>N1753  
ACCAGUGUUGC UUUCAUGAAACUAUGUGGCUGAACAUAGACU  
>N1754  
AAACUUUAGGGAUUCAUGGAACUGUUCGUUUCUUUUAUGA  
>N1755  
GCAUUCAAACUUUUUGUUGAACUGCAUCAACCUGCCACCAG  
>N1756  
GUAGGAGCUAGGAACUAUAAACUAUGCAUUAUGUGAUUUGA  
>N1757  
AAGAACAUAUAGUCUAAAAACUGGUGAAAAAAAAAAAAACAC

>N1758  
UGCAUGCCCCACACCACUGGACUCCUAAGAAUUUCACUGAG  
>N1759  
GUAGGUCCCUCUGGGGAAGAACUGGAGAAAGGGUAACAGCA  
>N1760  
AGUUGACCAAAGUGUAAAAGGACUCUGAGUGUGCAGCUAUGG  
>N1761  
AAUUAAGAUUACUACAUAACUAAUGAUUCUACAUAUA  
>N1762  
UUUACAAUGACUAAGACUAGACUUAGAAUGGACAGGGAAUG  
>N1763  
ACACCUGAUAAAAAGAAUAGACUCACUGCCUGGAAACAUUA  
>N1764  
CUGUAAAACGAAUGUCCAAACUUGUCCUUGCAUUAGUCAG  
>N1765  
AUUAUAGUCAUGUAUGGCAGACUACAUAUACUUAUUAGUAGA  
>N1766  
AGAGGUAAAUUUCCUCAGACUCUCACCUACCUUUAGUGC  
>N1767  
ACAGAGGCUUGGAGUAGCAGACUCAAAAUGAGCCUUGAAGU  
>N1768  
UGUUUGGCAGUGAAAGCAGGACUGCUAGCUUGCUUCUGCUC  
>N1769  
GAGCAUACUUUUAUUAGAAAACUGACUCAGAAUGC UUAGAA  
>N1770  
CAUGAAAUACAACCAUGGAAACUUCUUCAGUUUUGGUGGCU  
>N1771  
AUGACUAACUGGAAUCCAGACUUUGGACCAUAAGUCCCU  
>N1772  
ACAAGGGUGCUGGGAAUUGAACUCUGGUUCUCUGCAAAGU  
>N1773  
AUGAUCAGAAAAGAGUGAGAACUACCGAAUCUAUCACAAGU  
>N1774  
CUCAGAUUAUUAUUGAUGAGACUGUUAUCUGCUGUGACUC  
>N1775  
CAAAACAGAGGAAAAGAUAAACUAUUACUGAAAUAUAACA  
>N1776  
CAUCCUCACAAUGUGUGGAACUCAGCUUUGCAGUGUCCCU  
>N1777  
UAUUCAUCACGUAAACAGAAACUGUUGUUUGGGUAUUUAU  
>N1778  
AGAGAGAAUUAUCAAAGAACUGAAUAACCAUAACCUGAU  
>N1779  
AGAAUUUAAAAAAAAACUGAACUACGAAUUUAUUGAUUCA  
>N1780  
UGCAGAAUUGUUUGUGAAGAACUGGAAUAGAUCUUCUUUG  
>N1781  
AAAUCCCCUUAAGGAGGAGACUUUGCAUAUGUUUUACUGC

>N1782  
UGGUAGAAUUAGGAAACAAGACUGCAGUUUGUCUCCUGUGA  
>N1783  
UAAUGUCUAGCAACUGCCAAACUAAACACUUCAUUACAAUC  
>N1784  
UGAAGACCUACUGUGAGAAGACUGUAGUAUCUUUCCCCUGG  
>N1785  
UCAUAAAUGGAGACAUCAGGACUUCAGCAGGUGAUGUUAUC  
>N1786  
CAGAGGCUAGAAGCUCCAGGACUGGACCUAGAAGACAAAGG  
>N1787  
UGACUUCUAGUGGUCAGAGGACUUCUGGGGUUCUGGGUAAAC  
>N1788  
CUCUCACUCACUCCACACAGACUGAUUUUCCACUUUAAAGA  
>N1789  
CUCAUUUCAUUUUUGACUAAACUCUAGUGACAUAUGCAUUU  
>N1790  
UCUACAAAAGAUAAAUACAAACUCUGAUGUUAUCUUAAAA  
>N1791  
ACUCUGAUUUCAUUCUGAGAACUCACAUCUUUCUCCUAAG  
>N1792  
CAAAGGCAAUUUCCCAAAAACUGUCUCAUAGUACUGUGUA  
>N1793  
GGACCUGAGAAAUGUGGUAACUUAACAUGCCCAGAGGGCC  
>N1794  
UGCAUACAUUAAUGGAUAGAACUAGAAAUGUUAUCCUGAG  
>N1795  
AGAGACCUGGGACAUGAGAAACUGCAACCUCAGUAGGAAG  
>N1796  
GUGGAAUAGCCUGGAUCCAGACUAUUCUCCCUCCUCACUAU  
>N1797  
ACUGGGGGUGGCAUACUGGGACUUAACACACUGGCUGGAGCU  
>N1798  
CAAUAGUGUUAUCAUGCAAAACUUAAGAAUGUUUAUUCUAC  
>N1799  
GGUUUAUGGGAAAUA AAAAGACUAUAUUCUAUUCUCCAUGU  
>N1800  
AGUGAUACCUCAGACUGUGAACUAUGCAUGCUUGUAUAAUC  
>N1801  
CUGAGUCAAUUGAUCUUGGAAACUACUUUAUUUGUGAGCAA  
>N1802  
CAUCCAGCAAUAAAGGGGAAACUUGAGGAGUAUAAACAGGC  
>N1803  
UGC UUUCUUCUAGACUUGAACUUCUUC AUGGUA AAUAAUC  
>N1804  
AAGGCACGGUCUCACAGAAAACUUCUUUUCCUCUGACUCU  
>N1805  
CAACACAAAUCUCUCCAAGACUUCUGUUUAUAAGGAGGUA



>N1806  
UGAUUUGUUUAACACACAAAAACUUUAUGAUACAUCUAAGU  
>N1807  
AAUUAUGUCUAGGGUAACAGACUAAGUGUUUAUCCCCUCCA  
>N1808  
GUAACCAAGGAUGAUUUUGAACUUCUGUUCUCCUCCACAC  
>N1809  
AAAGCUCUUUGGUCACAAGGACUGUUUAAAGCAACAAGAAA  
>N1810  
CUAUUUCUUAUAUUUUCUAAACUUUGGUCACAAUAACCUUC  
>N1811  
GCUGUGCUGGUGCACAAGAGACUGUGGGCACUGUGAGCAGA  
>N1812  
UAUGGUCACCAGUCAGCUAAACUUGAUUAUGCACAGUAGCAA  
>N1813  
UGACCAGCUGUGAACAGUAGACUGUGAACAAAUUGAGACCU  
>N1814  
UUUUCUUAUACAGCAGCAGACUGAGUAAUGAAACCUGAUG  
>N1815  
CAUGAACAGGUAACAUACAAACUUGGAAACUAUUCCAGCU  
>N1816  
CCAGAACCAAGGUAGCCAGAACUCCAGCCCCUUAUAGAGUU  
>N1817  
AAGUAAGAUUAAGGUCAAAAACUAUUAGAAUUAUACCCAAC  
>N1818  
UCUCUGCUUCAUCCAGUAGACUAAAAACAGAAGGAACUCA  
>N1819  
UAGAACCCGAAGUGGUUUAAACUUAAAAUAUUUAUUUAAGA  
>N1820  
UAGGGAGUUUAUGGAGAAGAAACUGGGAAGGAGGAUAACAUU  
>N1821  
UUGCCCAGCAAAUUAACCAGACUAUAAAAAUGGGUUUAUUG  
>N1822  
UGAUUAAAAACAUCGUUAAAACUGUUACUAAAUAAAAUAAC  
>N1823  
UGCUGAGUUAAUGAGCAGAACUGGCAUUCACUUUUCUAU  
>N1824  
AUAAAAUAACGCAAAGCAAAAACUGUGUGUGAUCAACAGUA  
>N1825  
CUUUUUCAGAUAAUAAGAAACUAGAAGAAUGCCACUGUUG  
>N1826  
ACAGACAUCCACAAGUGAGAACUUA AUGCCACAGAUAAACU  
>N1827  
GGAAUAUUCUAUCCACUGAACUAGCAUUUCCAGGUUUGAU  
>N1828  
GAAUCAAACAUCAUUCAGGACUACACACAAUGCUUUCGAU  
>N1829  
AGAAUUUCUGGUUCUCGAAGACUGCAUUAUUAACUCCUUC



>N1854  
AAGCCAUAAAAAGUCCAAAACUUUACUCAGUGGUUAAUGG  
>N1855  
GUUUGUGAUAGCCAUUUUGGACUAGGGUGCAAUGGAAUCUC  
>N1856  
UCCCAAUCCCCCUCAGAAACUCCCUAUUCCAUCCACCCU  
>N1857  
UGCUCAGGGCACUGGCUCAGACUGGAGAACCUGUACCACUG  
>N1858  
CAAGGAACUCAAGGCAGGAGACUGACACAUAGGCCAUGGAG  
>N1859  
CCUGGCUUGCUUAAAAGGGACUGUUUGGCCUCUAUGCCUA  
>N1860  
UGGAUGCCAGAAGAAUAAAGACUCCUACUUAAGGGAAUAGA  
>N1861  
CCAUGUACUGGGUCCAAAAACUCAAAACAAUAAUUUCCA  
>N1862  
AACUUGAAUCAAUUUGAAAAACUACACACGGAAAAGUCAGU  
>N1863  
CAAGUUGCAAUUCGAGAAAACUGUGUUUUGUUUUUGUCAU  
>N1864  
GAGCAACACACCUGCCCUAGACUUUUAAAAGUAAGCUUUCA  
>N1865  
UGGGGCCCUUAUAUGUCAGGACUCAGAUAGUUCUGUUUCUU  
>N1866  
CAUGC UUUUGCAGUCCAUGGACUUAGUAAGAUUCUGUAGUC  
>N1867  
UCUUGUGUGUGAAUACAGGAACUUACUUGGUAGGCUCACCA  
>N1868  
GCUUUGAUAAACAUAAAAAACUUUAUAUGAACCAUGAGAA  
>N1869  
AAAAAAUACAACAAAUUAAAACUGUCAAAUAUCUAGAAUGC  
>N1870  
UCGACUGGGCUAUAAGGGAACUGCAUUGCAUGAAUAGACU  
>N1871  
ACAAUAAAUUUCCAAAGAGGACUACCCAACCCAAGAGGGUG  
>N1872  
CUUAACAUCAGAGAAUGAGACUUUGUCUCCUGCCAAAUU  
>N1873  
AAUUUUAGGGCUUCCCCAAACUACUACCAUUGUAUCUCCU  
>N1874  
CUUAUGAGCAACAAGAAUAGACUCAGUAGGUUGUGUGUGUG  
>N1875  
GGAAAAUAGCUGUAUCAGAAACUGAUGUGAGAGCCAGAGGA  
>N1876  
ACCAUCCAACUCUUUACUAAACUAGCCUUGAUUUUCAAGCC  
>N1877  
UGCCAGCGAAGAAAGAGAGAACUAUUGAAGUGUGAUGUGGU

>N1878  
AAGACAUUACAAUAAGUCAAAACUAUAGAAAUGCCAUCAUGG  
>N1879  
UUAGCACAGCUGAAUCACAGACUGACUGUCAAGGCCAGCG  
>N1880  
AAAGGUGUGUCAGCCGUCGGACUCGAAACUUCGCCUGAUUU  
>N1881  
UGGUUGCGAGUAUCUAUGAGACUGAUAGUUUCUCAAAGCGC  
>N1882  
AGGCAGACCAUGCCAUAUAAAACUUCAAAAAUCCAUCAGUU  
>N1883  
CAUUCUGGUAAGUGCUGAAACUUAUUAAAACUCUGUUGAC  
>N1884  
CUGUGGAGGCUCUCCCACAAAACUGUCUAUUCACUCCUCCCC  
>N1885  
CAAAGACCACUCUGGCCUGGACUUCCAUUAGCGCCCAAUUC  
>N1886  
AACAAAGGCCUUGAGCCAUGGACUUA AUGAGCUCUAUAAAA  
>N1887  
CCAUUCUCCUCUGCAAUAAAACUUGGAUCAUCUUGGGUACC  
>N1888  
CAACCCUCUGACA AUUUGGAAACUGAAUCUGAAAAAAUAAA  
>N1889  
UUUAAAACACAGCGUUUAAAACUCCCCAAACAUCCCAACCA  
>N1890  
GGUGCACUGAAUUUCAUCAGACUUCUGUCCCAGAGUUCUCC  
>N1891  
GGCACCCAUUGAUGGGGAAGACUCAUCUGCAUUGUGGGUGU  
>N1892  
CAUGUUGCCUUUCUCAGGAGACUUUGGAGGAGACAGCUCAU  
>N1893  
GAUCCCCCACCACCCAGGACUGCCAGUCUUUGAAGUGCA  
>N1894  
AAGUCAUGCUGUCCAGAGGAACUCCCCAAGAUAAACCAGCUC  
>N1895  
GUAGACCAGAUUGGACUGAAACUCACAAAGAUCAGUUUGCC  
>N1896  
GAUUUUUAUUAUUAAGAAAACUCAAAACCACUGACAACUGC  
>N1897  
AACAGAUUGCACUAGGAUAAAACUUUCAAUCCACCAAAGUCA  
>N1898  
GUAGCAAACUGAAACUCAGACUCAUACGGGGCCUCAACUC  
>N1899  
UGUGUGUGUUUCUGAAAGAAACUCUUGCUGGCCUAGAAUUC  
>N1900  
UUUCUACAAAUAUUUCCAAACUAAAUUUAUCUUAGCUCUA  
>N1901  
CCAGCAGUACUGACGAAAGACUGGAGGGUCCUUGGAAUUU

>N1902  
CACCAUGUAUUUGCAUAGAAACUUGAUACUUCUAAAAGCAU  
>N1903  
UUAUCACCAAUAGCACUAGAACUUGAACCCACAUCUCUGAG  
>N1904  
UGUUCCCAUCUGACCCUCAAAACUUGAACAGUAAAUAAGCCU  
>N1905  
AACUCAUAGUGGUACUAUAAACUAGCCAAGAUGUCAUGACU  
>N1906  
CUCACUAGCAUCCUCUGGAGACUUAUCUGGCUUAUCAGGAAA  
>N1907  
GCAAUAUAGACCCUGAUGAGACUUAUACUUGUCUCUCAUGA  
>N1908  
GCAUGAAAGAGUCCUCAGGAACUCUGAGGAGACAACCUGAG  
>N1909  
UCAUGGGAGUCUAACCCAGAACUUUAGGGUUUGUUUAUCUC  
>N1910  
AACUUCAAGCAAUAUGAAGAAACUGAUACACACAUAACAAAU  
>N1911  
GUGUGUGUGUGUGUGAAGAAACUUGGGGAGAAAUUUAAAUC  
>N1912  
CUAUGCAGGUGAGCGUGCAGACUGCAGAGGCAACAUAUCUU  
>N1913  
AGAAAGUGAACUGAGCACAAACUUAUAUGCAUUCACAGUUU  
>N1914  
UGGAUAUGGGGUUAUUGAAGACUUUUCCCAAUCUGUAGGU  
>N1915  
CUAUCCAGAAUCCGUAGAGAACUAAAAAUAAAAAAGUAACA  
>N1916  
UAGCUGGGUCUUGAGGUAGAACUCAGUUUCUUAAGAUACUGA  
>N1917  
GAUUGGUGGUUGGAUUAGAAACUUUGGAAACCAGUCUGGUA  
>N1918  
AAAAGAAAAGGCAUUUAGAAACUUAUAAAAAAGAUAGCUGU  
>N1919  
GCUUUUUGCUUACAGUUAGAACUGUGAACUCUCAACUUGCU  
>N1920  
CUUCCUAAAAAUUGUUCAAACUAGGUAGUCUAAACAACUC  
>N1921  
CUAAUCCUGGUAAACUCUAGACUCCUCAACCAAAGAAGGUU  
>N1922  
UUUGGAUGACCUGAGUCAGGACUUAACAAACGACCUAGCUAC  
>N1923  
AACUUGACUUCAACUUUGGAACUGGGGUAAUUGGUGAAUUG  
>N1924  
UUAUUUAAAAUAACUUGCAGACUUCAUCUUGUAGGAAUGG  
>N1925  
UAUCAUGAAGGCAUCUCAAAAACUAGAUACAUGAGCUGUACU

>N1926  
GGAAGAAGAAAAUACCUUGAACUGGGAACCAAAAUCAAG  
>N1927  
CAAUUAAAUCUUGCAUUGAACUAUGGUAGCAGGAUCUUA  
>N1928  
AUAAAAUCCAAGUGGGAAGACUGAACCCAGGCAGAGGUAAA  
>N1929  
UCUUACUAAAAGUCACUUUGAACUGCAAUCAGAAACAUAUU  
>N1930  
AGUGCCUAAUUCAAUUAUGGACUUGCUUGCAUAUGUGCAGA  
>N1931  
AGAUCGUGAGUCACAGUUAAACUGCACACUAAAGAAUGGGU  
>N1932  
AUCUUGGAACUCAAGAAGACUUAGCUGGAUUUUAAGCCA  
>N1933  
UAACAAUCACUAGAUCUGAGACUGGGGCCUGCUGACACCU  
>N1934  
AGUGUUAUCUAAAUGAUAAACUUAAAUCUGUCAGGAAAAG  
>N1935  
AUCGAGGUUGUUACUUAAGAACUAAAAGAGCAUGAACUAUU  
>N1936  
GUCUGACAGCCACUUUGAGAACUCUGGUCCAGACCAUUUGG  
>N1937  
CACCACCGACAGUGGGUAGAACUUCUGCCUCCAUUUUUA  
>N1938  
CACCAGUCUUAUUAAGAAAAACUUUUUCAUGUUCAUGUGUU  
>N1939  
UAUCCAGCUACUUCACUGAAACUGUUUAUCGGGUUAGGAG  
>N1940  
UGACACACAGCAGCCAUAAGACUUUGCUUUCUGAAAUAUAA  
>N1941  
UGCUAAAAGUCUAAUUAGAACUCAUUCUAAUCCACUAAA  
>N1942  
CUGUUCUUGCUCUGGAUGGAACUGAAGGAGGAGGAAAAGGU  
>N1943  
CAAGCUCACUGCUCUGGACUCUACUCAUGCAACUGCAU  
>N1944  
AGCAGACAGUCUGGGGAGAACUCUGCCUGCCGCUAUACU  
>N1945  
UAAGCCAUGUUUUAACAAAACUAUAAAUCCAAGCUCAUGA  
>N1946  
AGAUAUCAACUCAAGAAAAACUGUGUUCUUCAUAAAAGAU  
>N1947  
UCUUGUUGUAUAAUGCUCAAACUAACCUGUAGAAUGUCUCA  
>N1948  
UUUAGAGGAGAAGCCUGUGGACUUUUGGAAGAAGCUUCCAG  
>N1949  
UUUCCUUGUUGAGGGUGAAGACUACACUUGUCCAUAAGGAAU

>N1950  
GACUGAGAACUGACAGCCAGACUGUAAAUGCUUUCAGUGC  
>N1951  
UGAUCUGUAUUUUUAAAAAACUAUCAACUUCUUGCCUCU  
>N1952  
AUACCUGCUGGGAACAGGAAACUGAGUUCUCUCAAUGGGG  
>N1953  
CCCUAUGUUUAUAGAGCAGAGACUGUAGUGCAGAUCUGUAUC  
>N1954  
GUCACUCCACCCUCUCCUAAACUUAACAUAGGAGAACACCAU  
>N1955  
AAUCGGGGCUUUUAUAGUGAGACUAUGUCUCAAUAAUAAAGG  
>N1956  
AUGAGGGAGAAGAGAGGCAGACUCCGCUAGGAUUGUUAGAA  
>N1957  
CAAGCCUUGAAGAGCUGAGGACUGAAUAAGUAAUACUGCC  
>N1958  
CCAUGCAGAACUGAGACCAGACUAUGGUGAGAAGGAAUUGA  
>N1959  
UACUUCUGAUGGAAGUGAAAACUUUUUCAGCCACUAUGGGA  
>N1960  
AGAUGGGAACAGAGACAGAGACUGAGAGACCUUGGAACACU  
>N1961  
CACAGAAGAAAGAGUCAGAAAACUGAUAAGCUUCCAUCAGUA  
>N1962  
UCUCCAGCUCCCACUGAGAGACUAUUAGCCAACUAAAUAUA  
>N1963  
CACGGUCUUAAAGACCAUAAACUUUAGAGCCCGGCCUUGUA  
>N1964  
AUUCACAGCUAGGCUAACAAACUCUUGAGGACACAGCUUUA  
>N1965  
GAGGCAGGGCAGGGAGGGGACUUUGAUCGAGUUGUAAAGU  
>N1966  
ACUCCACAUAGGUGUUAGGAACUGCACUCAGACCCUCAGCA  
>N1967  
GCCCUAGCCAGGAAAGACGGACUCUCUCUGCAGAGCUGUAA  
>N1968  
AGCUCAGGGCUCAGUGAGAGACUGGUGAAUAAGAUUGAGAA  
>N1969  
AGUUUAUUUCUAUUUGUAAAACUAGCUUAGAAAUGGUGACU  
>N1970  
GUAGAACAUAUAAUGGUCAGAACUACUCCACGUGCAGACCG  
>N1971  
ACUGGCGACCACGGUACUAAACUUGGCUCAACCAUGCAGCA  
>N1972  
UUCUCUCCAGUUAAGUUGGACUCCAGGAGAAAUAUUUUUAU  
>N1973  
UACCUCUGCCCCAGCUUAGACUCUCUCCCUUAUCCUCCCA

>N1974  
GAACUGUGGAGAAGCACUGGACUUGGGAAAACAUAAGAUUUU  
>N1975  
GAGAGAGAGAUAUUACAAAGACUUCUUCUGGUGACUAUUU  
>N1976  
CAUACCUGAACAGACAUGGGACUGUUGUCUUCAUGUCCCAU  
>N1977  
GUCUACUGACGUUCCCACGGACUGAGGAGAAAAGGCUCACA  
>N1978  
UUCGCAUGAGUAGCAGAUGGACUCCAAAGUCUGGUAACCAU  
>N1979  
UAUGAACAUUUUCAGGGCAGACUGAGUUUGGGCUGUGAGUG  
>N1980  
AUGAGGCAGUCUCACAGAGACUUCCCAGUACCCUGGUUCU  
>N1981  
AGACAUCAAAGUCGGAGGGAACUCCCUGAGAAGGUUCCAGA  
>N1982  
AUGUUAUGUGAAGGUAUGAAACUGUCACACAAUAAAACAA  
>N1983  
CAUGUGUCUUUUAUCCUGGACUGAAUGAUCAAGGUGGGGU  
>N1984  
ACCUGGCUUGAGAAUUUGAAACUGCAAAGCCCACCCCAGAG  
>N1985  
CUGCAAAGCCCACCCCAGAGACUCAUUUCCUCCAACAAGAU  
>N1986  
CAAGUCACCAACCUUAGGGGACUGAUUUAGCCCCACACAUU  
>N1987  
UUUCGUGGUACUCCGAGAGAACUCUCACUAAGCAUGUUCAG  
>N1988  
UCCCACUCUGACAACAAUGGACUGAACCUCUGUAAGCCACC  
>N1989  
AGCUCCUAUAGCCAUGCAGGACUCCCAGUAGAGGAGUAAGG  
>N1990  
CUCCCAGUAGAGGAGUAAGGACUCUAACCCACCCACAAAAC  
>N1991  
ACAAGGGCACAAGGAACUGAACUGGGAGUCCUCUGUAAGGGC  
>N1992  
AAGGCAGGAGCUCAAGCAGGACUUGACGACUUGCUCGCCAU  
>N1993  
AACAGUCCUGUGCAGUAGGGACUGCUCUGAAUUUAGAGAAC  
>N1994  
GGAAAGUGACAUAUGUAGAAACUAAUGUGCUGGAGGGUGGU  
>N1995  
GGCCUCAUUUAAAACAGAGACUUAGGGGCUGGAGGGAUGG  
>N1996  
UGCCAGUAUGCCACAUAAGAACUCUACCAACUGAAGGGCAU  
>N1997  
AGAGUGAUGCACAAUCUAGAACUCGUUCCAUUCUGGAACUU



>N1998  
ACUCAUAAGCAUGCCUAGAGACUAAUCUAACAUAACAACCAUC  
>N1999  
UGUCACUUUACAGGAGGCAGACUGUAACUCCAAAUAGGACA  
>N2000  
CCAUUCCCCUGCCGAGCAAACUGCAAUACUGUGUGUACUG  
>N2001  
AUAAGAUUACGAUUCUAUAAAACUUGUACCAGCACAAACAUU  
>N2002  
CUACCAACCCACAGUUCAGACUAUUCCAGAAAGACAUCU  
>N2003  
AGUUGAAUCUCAAGUUCAAGACUGACCUGGGUUACACAGUG  
>N2004  
AGGGCAUAGGAUCCCCUGGAAACUGGGGUUGUAGGUGGUUGU  
>N2005  
UGUGGGACUCCUGGGAUCAAAACUUGGGUUGUCAGGUUUGGU  
>N2006  
CUGUUUGUCUCUAUUAAGGAAACUAACAAUAACCUAACGUGU  
>N2007  
AACCCCCUGUAACUCCAGGGACUCCUUUGGCUUUUGCCAGG  
>N2008  
UCCUCUCAGCCAACCUUUGGACUGAGCACAGGGUCCCCAAU  
>N2009  
UUUUGUUCAAAAAAGCCAAAACUCAUCCAGCUCUCAAACC  
>N2010  
CUGAAAAAAAUUUAGAUGGACUCUUACUGUGCAUUGAACU  
>N2011  
CAGUAGAUUUGUUUAGAAAACUUUUUACUAAUGCAAAAUU  
>N2012  
AAGAGUUAGAAAGGAUGUAGACUGACUUGUAAAAGAGUUAGG  
>N2013  
AAUAAUAAAGCAAGCUCAAAACUAUUGUAAUGAGCCUUUUU  
>N2014  
UUAGCACUAUAAAUAUUAGGACUGACUUCAUUGCUCUCAU  
>N2015  
CACUUAACUCCAGUGUUUAAAACUGUUUAGAUUUUGUUCAGA  
>N2016  
GGCUGGGUUGACUAGCGGGAACUGUAUUCUCAGAAAGAUAA  
>N2017  
GCUUUAGGAUACUCUAGUAGACUUUGUAAAUUUAUUUUUA  
>N2018  
AUUUUAUGAAAAUUUUAAAACUUAGAAUAUAGGUACAUG  
>N2019  
AAUUUAAGCAUAUCUCCGGACUUCUGAACUGCAUAUGAAU  
>N2020  
AAAGUUUAUGAUCCUGUGGACUGCCAUGUGGUUGCUGGGA  
>N2021  
UUUGCAAAGCAGUGCAGAAAACUAUAAUCAAAUGUGACAUG

>N2022  
UAGUGGCACUGAGGAAAUGGACUCAUGAGAUCUUAGAUCC  
>N2023  
UUAAUUUUUUUUUUAAAAGGACUUUAAGGUUGGAAAUCUAC  
>N2024  
AAUCUAACCUGCAAGCUAGGACUUUAAUACUCUGGCGUGUA  
>N2025  
AUAAAAAUUGCUGACUUUGGACUAGCAACGCAGUUGAAUUAU  
>N2026  
GGCAGCCUACUUGACAGAAGACUUUUGGUUGGUCAACCACU  
>N2027  
CAUAAAGAUUGAAGGACAGAACUUACUCCAAAUUUCAUUUU  
>N2028  
UGGUUUGGUGUAAAUACAGGACUGUCUGUCUGGUGGCCAUG  
>N2029  
GUUGACUCUUUUCAGAAUGGACUUAGGGAAAUAGAAUAAUU  
>N2030  
UUCACUGUUGAGUUCAUGGGACUCCAGUAAAGUAUGAUUAUG  
>N2031  
AAAAUAAUUACAUGACAAAACUCAAUUUAUACAUGCAUUC  
>N2032  
CAGAUCACUUAAUUUCAGAACUUGAGAGGCAGAGACAGAU  
>N2033  
UUGAAAAAAAACAAAACAAAACUAGUGUCCUCCUGCUAA  
>N2034  
CACAAGGGCUACAAUGUGAAACUGCUGUGACCUUUGUGAAG  
>N2035  
CCGGCUCCUCACUUGAGGGGACUGAAGGUCGGGUCUGAGGA  
>N2036  
GUUUUACUAAAAAUUGGGGACUUAGGUUUUUGUCCCCCA  
>N2037  
CCUGGCUGGGCUGUCCUAGAACUCACUUUGUAGACCAGGCU  
>N2038  
UAAAUAAAGUCCAUUUCUAAAACUUGCUAGAAGUUUGGCAUG  
>N2039  
UUUUAGCUUGUUAGUUUAGAACUGGGCAUGAUGAUACACAC  
>N2040  
ACAGAAAAGAAUUUGCAUGAACUAAUAAAUGUUUACAUA  
>N2041  
UGCUGAACCGGAUGUGAGACUGGGAAAGGAUGACACAGG  
>N2042  
AAUUUGAGAUACUGGACUAGACUGCUUAAAUUUCCGGCAG  
>N2043  
ACACAGAUCAUGCCAUAUAGACUUCCAAUCUAGAUACUGUU  
>N2044  
UGAAAGCAUGCCUCUCAGAGACUCACAUAUUUUCUUUAUA  
>N2045  
UCUCAAGGGAAGUAAUAUGAACUAACUUACUUGAGGAUGCC

>N2046  
GCCUGAACCAACAAACCUAAACUAUACACCAAUGGGUCUAU  
>N2047  
AUACACUAUAAAAAGAAAGAACUAUAUCAUUUAGACAUUCA  
>N2048  
UGUCUAGCUAAUACUACAGAACUAUGUGGCUAUCAUCCUU  
>N2049  
UGGUAACAGGAUCCCAGGAACUGGAGUUGUGCAUGAUCAU  
>N2050  
UCAUCAGGGCAGCAGAAAAGACUUGGAACUGAACUGCAACC  
>N2051  
AUUAGGAUGAACUCUGUGAAACUAUGUGAAAGCUAAAAUUC  
>N2052  
AGUGGGGUCUUUCAAUGGACUGUGAUCAAUUUGAUGGA  
>N2053  
UUGAUUCAGAAUAAUAGAAACUAUUGGUUUUUAAUAGAA  
>N2054  
GCUCGCCAGAGAUCCUUCAGACUGGCUGGAGCGCCGCGUUG  
>N2055  
UUUAAAACUCAGUUUCUAGACUUUAAAACGUUCAAAGUG  
>N2056  
CUUCUUGUUUCCUAAGAAAACUGAAUAGGGUGGGCUACAG  
>N2057  
GCUAGUCCUUUAUACUCUAGACUCACUUUUAAAUUGUAUAG  
>N2058  
UUUAAAUCAAUUCUUUGUGAACUUUGUGCACCAUAGUCCCA  
>N2059  
CCAAGUUAGUCAAAAUAAAACUAUAUCCAUUGUGAUAAAU  
>N2060  
GAAGGUAUGAAAAAAAAAAGACUAAAACUUCUGUAUAUUUAU  
>N2061  
GUUGCCAAAUGAGUGGAUGAACUCAUGUCCUCUUUCUCAG  
>N2062  
UCAGACUUGUUCAAACUGAACUUCUUAUUCUCCUAUACUU  
>N2063  
GUGGUGACUUUUGAAGUCAGACUGAAUUUAUUUUGCUUUUAU  
>N2064  
GUUCAAUUGUUCAGGUUGAAGACUUCACAGUUUUGGUCCUCA  
>N2065  
GUAUAGGUCCUGAGGAUUGAACUCAGUCCUUAGGCAUGUC  
>N2066  
GUUCGGGAUGGUAGCAUGGAACUGUAAGUCAAAUAAAUCCC  
>N2067  
UUGCAGGAUGAGGAGACUGAACUUGGCUUGCUUGGAUUACU  
>N2068  
UAACAAAUACCUAGUCCCAAACUGUACAUGUCAGAGAACUC  
>N2069  
AGAUUUUCAUGAUAAAAAGAACUGCUAGUGAGAUGGCUAAC

>N2070  
GUGGGAAGGCAUCACACUGGACUGUGCUUUGAUUUGGCAGG  
>N2071  
AUUAGAUUAUUCACUGGGAAACUUGUUGAAACAGGGCUCCU  
>N2072  
UGAAGAGAAUGCUCACACAAACUCACCCAUAGAUAGGCCCU  
>N2073  
UUUUGAACUUUUGACAUUGAACUUUGAAAACAGGCACAAGA  
>N2074  
AUGAAAAGAAAUAUAUAAACUGACUAUGAAUCUUAAGUG  
>N2075  
UUGCCUACAGAUAAAGGUAGGACUGUUUUUCCUGUCUUGUUU  
>N2076  
UAGUGCACACAGGUGAGAGGACUGGGCUACUGAAUACACUA  
>N2077  
GCUGUUUUUUUCAUAUUGGGACUAUCAGUUUAACUACCAA  
>N2078  
AUUUUCCAUCUAGAAAUAAAACUUAGGCUAAGUGAAUUAAC  
>N2079  
CCCUACUCCCUUUGUGCAGAACUCUACCUGCUUUGUAGAGA  
>N2080  
UGUCCCCUCCCAUGCACAGACUUCUGAGGGCGCCAUCUAC  
>N2081  
AUGUUGCAACUCUUGC UAAAACUGCAGGUUUAUAAAUAAA  
>N2082  
GUAGAUGAAGAUGGCCAUGAACUUGCAUACCAGCAAGCACA  
>N2083  
UGUAACCAGGCUGUCUCAAACUCAGAAAUCCACCUGCCUU  
>N2084  
CUGUGGCUCAGGACCAAGAAACUGACAUAGAGAAUGUGUAG  
>N2085  
CACCUCAGAUACGCUUUAGGACUCAGACUUGUUUAGGAUCC  
>N2086  
AUGAGUAAAAGUGUUAGUAAACUGACCCAAUUGUCCUUAAG  
>N2087  
ACAUAUCAUGACUGGAAGAGACUGAGUUCGAGACUAGCCUG  
>N2088  
UGCCAGUUAUCUCUCUUGGAACUGGGUUCAUUCCUGUUAC  
>N2089  
CACUCUAGAAGGUGAUGGAAACUUUAAGAGGUGGGGCCUAG  
>N2090  
CUCAUAAUAAAUCCAAAGGGACUAGGCCAACAAUCACAUAU  
>N2091  
CAUUUAGUUUUGAAGGGUGAACUAAAUUCUAGUUGGGAUC  
>N2092  
CUGAGAAAGUAUUCUAGCAAACUAGUAUUCUAGAAGGUUAU  
>N2093  
AAAGGGAUUCUUAACUUGGACUUUAUGAAGAUCUCAAUG

>N2094  
AAAAGAUAAACAGAUUAACAGACUGGCUACAUAAGAGGACC  
>N2095  
AUAGUAGUCUCCUUAUCUGGACUCCCUUUUCCCUCCUGCUU  
>N2096  
CCUAUAGUAAAUCAUCCAGACUCAGAUCGAAAACAAGACU  
>N2097  
UCAUUGGAAGAUAAAGAGGAGACUCUUUGAAUUGCUGUGCCA  
>N2098  
ACACUCCUGAAACGCCUGGACUUUAGAUGCUGUUCAGUAU  
>N2099  
GAACUCGUUUAAUUUUCAGAGACUUAGGGAGUGUGAUUUUU  
>N2100  
AGGGAGGAGGGAACCCCGGACUGAAGUUCAUUCGUAAGAG  
>N2101  
CUCUGUCACUGUGUGGGGAGACUUCAUUAUCCAUUUGAUG  
>N2102  
UGUAUGUUAUGUAUGGUAGAACUCUGUGGUAUGUAUGUGUG  
>N2103  
UACAUGAAAGAUGGGACAAGACUGUGGAGCUAUUUUGGAUA  
>N2104  
CAGAAAUUUUUAUUGCAUAAACUAGCUGUUCUUUACUUCU  
>N2105  
AAUCUUUUUCACAGUCCAGACUUUAUCCACUCCUGUUCA  
>N2106  
UGCACAGCCCAGAGGGUUGAACUUUUUUUUUUUUUCCUUU  
>N2107  
UGGACUGGCACACAGCAGGGACUGGUCAGGACAAUAGGGG  
>N2108  
CCCAGCCUGCCUUUGGGGAGACUUGCUCACCGGAGAGUUA  
>N2109  
CUAUGUGUCAUUGGACAUAAACUCUGAUUUGGAGCAGGUCC  
>N2110  
UCUCUGCCAAAGAUGUACAAACUCCCUCAUUCCACUGCAG  
>N2111  
AUCCAAGUCAGGAGAAAGGAACUCUGGGUCCACUGAAUACC  
>N2112  
AGUGGCAGAGCCAAGGUUAGACUGAGCAUCCAGCAGCCCA  
>N2113  
CCUGACUGGUCAUAGCAUAGACUUCUUUUCUGCAAACUGAA  
>N2114  
AUUGUCUCUCAAUGGGUGAAACUCUCCUGGCAAUUGCUA  
>N2115  
UAUUCUAUCACUGCAUAAAACUGGUUGUGCUGGUGCACAC  
>N2116  
CUGUCUCCUGUUAUGGUAGACUUUCUCAGCAACCUGCACU  
>N2117  
CCAUGAGUUACUCUAGAAAGACUGGGGGUGACUCAAUUGU

>N2118  
CUUUCUCUGAAGCACAAAAGACUCCCCAGACAUUAUAUAAA  
>N2119  
CUAUUAAUGUAAUAAUAAAAACUACCCAUGCAGUCUAGGUA  
>N2120  
CUUUUUUCUUUUGAAAAGGAACUAUACCUUUAAGAUAAA  
>N2121  
AAACUAAGGAAAUCUUAGAACUUGCCAUGUAGACCCGACC  
>N2122  
GCUUACAUCUUGAAAUGAAAACUAUGAAGAAAAUAGUAUUG  
>N2123  
UAGAAUCCCCUGCACCCAGAACUGCAGCUCUGGACUGACCU  
>N2124  
CCUCCAUUCCAAGAUGGAGACUUCAAGUGAGCUCGAAGGC  
>N2125  
CCAUGGCACCAGACAGAAGAACUGGUAAGUUUGACCAGGUU  
>N2126  
UUCUUUUACCAAUGUACAAAACUGAUUGGUUAUAAGAAAA  
>N2127  
GCCACAUUGCUACUCAUGAGACUCAAUUCUCAAAGACCACU  
>N2128  
UUUCGUCCAUCUCACGGAGAACUCACUGCUACCGUUGCAGA  
>N2129  
GUUGAUGGGCGUGCACCUAGACUGGUUCCAUUUCUCAGCCA  
>N2130  
UUGGAAAUUCCCAUACAGAACUGGAAACUUCGCAUGCCA  
>N2131  
CCCUUCGCUCUCAGUGGGGAACUUCACACUCCAGUAAUA  
>N2132  
UGUCCUGCGGCUACAGUGAGACUUGAGUAAGGGAAAAGCAU  
>N2133  
GGGACAUUGUCUCGUGACAGACUGCACCUAGUCAUCCAGCU  
>N2134  
AAACAGAUCUUAUUUAUUAGACUGCCCAUGGGAAGAGGGGU  
>N2135  
CUGUCAAGUUGAUGAUUGAACUAUUGAACCGAAUUCUUA  
>N2136  
CUCAGCAGCCAACCCAGCGAACUUCUUCUCAAGUCUUUGG  
>N2137  
AACUCUUCAUUUACAUA AAAACUGUUACCAAUCUGUUGUA  
>N2138  
CCCAGGUAAUAAAUGCUAGGAACUGAACCCAGGUAAUAAAUGC  
>N2139  
GUGACCAGUGGCUGUAAAAGACUCACUUGAGGCUUGCAGUA  
>N2140  
UCCAAGCCAACCCCGCUAAACUCUGCUUUA AAAACCACUCA  
>N2141  
CCCCACAACUGGCAAUGAGAACUGAAGGAGUUCCCACCUCG

>N2142  
AACUACACACUUAGAUUAUAAAACUUAUUGUACAUACAAGCUA  
>N2143  
CCAAAAAUUAAAAUAAAAAACUCUGAGGUCUGAGGUUAGA  
>N2144  
UUGUACACCAUGUACCCUAAAACUCUUGAGUGUCCUAGUUUG  
>N2145  
CAGCUUAAGUCUUCUGAGGGACUCUGGAUAACAUAUCAAU  
>N2146  
AAUCCUUAUAUAUGCCAGGACUUCUCUGGGAAUCUCCAAG  
>N2147  
GUAGAGUCUGGUCUUAGAAGACUUAGACUGCAGAAAGAGCA  
>N2148  
AAAGGAAAAAAGAAAACAAAACUCUGAGUGUCAAGAUAUCU  
>N2149  
GUCCUUUUACUUGUGGCCAAACUCCUGGGGGCUCUCCCAU  
>N2150  
AGCAUUAGACAGCUCUUUGAACUUAUUAUAAAAGAUAGUGACU  
>N2151  
CACAAAAAAGGUAGAGAGAACUAAUUUUACAAAAAUGAUC  
>N2152  
AUUAAGACUGCCUCAAAGACUAAAGACUAUGUAUAUAGU  
>N2153  
AGCUAUACCCUCAGUCAUAAAACUGAGGAUGUGGGAUGAAAA  
>N2154  
AGCACAGAGGAAAGCAGGAGACUAAUUUUUAGGUAAGAGG  
>N2155  
GAGGUCAGAGGACAUCUUGGACUGGUCCUCACAUCCAUC  
>N2156  
AAUGCCAAAACCUGCCAGAACUUAAGCAAUUAACAACUGAA  
>N2157  
ACAGAGACUUUAAAGAAAAAACUGGACAUAGACUACAAUGG  
>N2158  
UGACAGAUCUGUCUAAAAACUUAUGUGGGGAAAAAUGG  
>N2159  
GGGUGUGUCCUACUCAAUGGACUCACAGUGCAGGACUUCCC  
>N2160  
UCCCCGAGGUGCUAAGUCAAAACUCGCAGUCUCAAGCAUGCC  
>N2161  
CCACAUGGUGGAAGGAAAGAACUGACUCCUUAAGUUGUCA  
>N2162  
UGAAAGAUUAAAUCUCUGGACUUGGCAGAGAUCAUCGACC  
>N2163  
GCAGCUAGUGCAUUUCAAGGACUUCUGAAGUUACUUGGUG  
>N2164  
AACUGUUAUUGAGGAAAGAGACUUUUAGAUGUCAUCUUUCU  
>N2165  
AAAGUACCUAUUAUCAUGAACUUAAAAACGGAUUGCAGAU

>N2166  
CGCGGGCGGGGGGAAGGGACUGGGUACGCCGGGGCACGA  
>N2167  
GGUGAUCCACAGUUCCAGAACUGUCUGGGGGCGGGAGCGC  
>N2168  
GUGCCUAUCAAGCUAAUGAACUCAUUUCAAGACAGAAUAA  
>N2169  
GAGUUGCUGUGUUGGUAAAGACUGUGUUUAGCUCAUGCCA  
>N2170  
GAACUGAGGUGAGCUGAAGGACUGGCCAGGUAGGCUAGGCU  
>N2171  
GAUUUGGGCUGUCUGGCUGAACUGUGGCCGUUGCUGUUGAA  
>N2172  
CUGCAGGCUGCGCGCUGAGGACUCUUCUCGCCUUCUCCCCU  
>N2173  
GCAGUUUUGUGAUUUAGAAAACUGUCCUGACGUACUUUUCU  
>N2174  
GCGGCUGUCUGUUCGCAUGAACUCUGUUGGACUCCAGUAGG  
>N2175  
CGUAUGUAUGACAUUUCAAACUAAGUCUUAACUUCUCAAG  
>N2176  
UCAAAAUGUAGGCUAGUUGAACUUUUGUAAAGUUGCCUGGA  
>N2177  
CUCAAGCUGUGCUGAAAUGAACUCCUGCUUCCUCUAAUAG  
>N2178  
CAACAAUGCCUAAUAUUAAGACUAAUGUUUUGACACUUUAA  
>N2179  
GGGCAGGAUAUGAUUAUAAGACUCAUGAAGGUGGCUGAUGA  
>N2180  
AAGUGAAAUAACUGAAUGAACUUUAUUAAGGAAUUAUU  
>N2181  
AAAGAAUUUGGAGACUACAGACUGUCCCAAUUUGCAUUAUU  
>N2182  
UAGGAGCCUUAAGUCUAGAAACUGUUUGCUUUUAUAAAGCC  
>N2183  
UGGGGGGGGGGAGAGUAAAACUAUUUUUGCAUCUGAAUCU  
>N2184  
AUAGAAUAAAACAAUGUAAAACUGAAUCAUUAUAGUGGGA  
>N2185  
UCACUAUUCAAUAACUAGGAACUGCCUAGUCUAUCUGUGUU  
>N2186  
UUUUAAAAUUACUUGAAUAAACUCAAAUUUAUCAUAAUA  
>N2187  
UGUGACACACAACUGCAAAAACUUGUGGGACUGGGAGUGAC  
>N2188  
ACAGAACACAAUCAACAAAAACUAGGGCACCUCCAAAGUAC  
>N2189  
AUUCAAAAAAAGAAAAAAAACUUUACUAAAGCUCAAAGCA



>N2190  
CAAUGC UUAGUAUUUCUGAAACUAGAAUGGGACAAGAGAAU  
>N2191  
AACCCACAAAUAACAUA AAAACUAAUCAUCUGAUCAGUAAG  
>N2192  
AAUGAAAAAGCAUGCAAGAAACUAAUUUUUAUGUUUUUUACU  
>N2193  
AAAAAAUAAGGCAGAGAAGGACUGAGGCAGACAACCAAUGU  
>N2194  
AGAAGGACUGAAGCACCCAAACUUUGGUCUCCUUCUUGAG  
>N2195  
GUAAAAUUGUUCUGGCAAGAACUUCAAGUACUAUAUUGGAU  
>N2196  
UCCACUAAAAAAUAGCCAAAACUCUUAUCAGUUUUAUCAGU  
>N2197  
AGGAGACUGUGCAGGUAAAAACUAAAUAAGCAUGACUAGGA  
>N2198  
UAUAUGCUUAAAUCAAGAGGACUGACAGAAGGUGUCUUUUG  
>N2199  
UACUUGGCAUGAGUGUCUAGACUCUAAAUGCAUUAUAUAAU  
>N2200  
GAGCCUUUUGAAUUCUGUGGACUGUAUUUUUUUUUUUUUU  
>N2201  
ACAGUUUAGCCUGGUCACAAACUCAGAGAGCUCUGCCUGCC  
>N2202  
UGAACAAACUUCAGAAUUAACUAUACCAUAGAUCAAAUGG  
>N2203  
GUUGCCUCCUCACUGAAUGAACUCAUGGCUGAUGUACAUAU  
>N2204  
AUAUCCUGGCUGUCCUGGAACUCACUUUUUAGACCAGCUG  
>N2205  
GGCUUUUUUGGUGACAUCAGACUUUGACCUUAGCAGCAGAG  
>N2206  
GCACUAGGCUUUUAGUAUAAACUAAAACCAACCCACUGGCU  
>N2207  
AGAAAGAAUAUUUAAUAAGACUUCUCCUUUGAUAAAAUU  
>N2208  
AUACAUUCAAAUUUCUAGGACUAUUUAUAAACAAAGAAAG  
>N2209  
AAUGCAAGUACAUAUAAAAGGACUAUAACAAUAAAGCAGAAA  
>N2210  
GUCUCCUGGCUGUCCUGAAACUCUCUAUGUAGCUCAGGCU  
>N2211  
AUAGAGUGAAUUCAGCAGAAACUUUUGACUUGCACUCCUA  
>N2212  
AGUACUGGAUUAAAAGGAGAACUGAAGCUAGUGUUUAUUAUAG  
>N2213  
CAAUCUGCAAAACACAUGAAACUCAAGAAGGAAGACCAAAG

>N2214  
AAAGCAGUCACUAGGAAGAGACUCGAAAUAUAUGAAAAUUG  
>N2215  
GAGAAGUGAUUAAUUUUAAAACUGCCAAGUAUGUAUAGCAA  
>N2216  
CAUAGGUCAACAUCUUUUAAAACUAACGACCUGAGCAAUGCC  
>N2217  
AUUACGAUUAUUUCUUAUAAAACUUUCAUGAAAAGUAGGAAA  
>N2218  
AGGGAAGGUUUAGUUAGAAGACUGAGGAAGCACAGUAGUGU  
>N2219  
AGAAGUUAUGAAACAAAUGGACUUAACAGAUUUCUACAGAA  
>N2220  
GCACAAUCAGAAGCUCUAGAACUAAAGGAAGCAAUUCACG  
>N2221  
GGUCAAGGACACCACUAGAAAACUCUACAGCUUGGGCCCAUA  
>N2222  
CAUAUUUUAAAAUAAUGAAAACUCUUAACUUAUCAUUACAC  
>N2223  
UUUCUGAGAUGACAUCUAGAACUAUUUGUUCAUGUAUUUUC  
>N2224  
UGCUGAUACAUCUAUUAAGGACUCUAUGAAGGCAUUUUCAC  
>N2225  
GUUGGAAUGUUGCUGUAGUAAAACUGAUAGCUUAAUUUGAAC  
>N2226  
GAAAAGCAUAAAACUCCAGACUGGAAAUAAGGAGACCACU  
>N2227  
UUUGUAGGUAAAUGGAUGGGACUAGAAAUAUCAUAUUGAG  
>N2228  
UGGGCUUGUCUGGAUUAAGGACUAGUCUCCUAAACUGCCAG  
>N2229  
AGACCAAUUCACUUCAUAAAACUUUUUAUAAAUACCACUAAU  
>N2230  
AUGAUAGACUCUGGUUAUAGAACUAUGAGCUGAACUAAACUC  
>N2231  
GUGCUCACAGAUAAAGCCAGACUAAGAAAGAAAGAGAUAAU  
>N2232  
AUCCAAGAGUUUUACAGUAGACUAAGCGAGUAUUAUUCAAA  
>N2233  
AAUCUCAGAAGAGACCUUGAACUUUGGACUUUUAAACAUUGU  
>N2234  
GUCCUUGC GGGUGUCUGGAGACUCCGCAGGCAAGGCACCCC  
>N2235  
AGAGUUCAUUUUGGGGGCAGACUGCCAGAUUAAAGGUGGUG  
>N2236  
UUCUUCUCACAUAGGUCUGAACUGAGAUGC GCAUUGAGAGA  
>N2237  
UGUUUAUGCUGACAUAACAAAACUUCUCUGUUGAAUCUUCUC

>N2238  
AAGUAUGUAAGUCCUGAAAGACUUGAUAGAACACGAAUUUU  
>N2239  
GAAUUGAUUUGUUUCAUGGACUUCUGGUCUCCCCUCUGUU  
>N2240  
UGAGUGAAAUAAAACUUGGAACUUUAAAUUUGGUAGCAGCA  
>N2241  
UGGGGAAUGCAACAAAUAAGACUUC CAGUGCCAGAAAUGGG  
>N2242  
AUCCUCCCUGAAAUAACAAACUCUUUAAUCCCCAAACUUU  
>N2243  
CUUAUGCACAUGGGUGCAGAACUGCUUACUCAAGUAGCAAU  
>N2244  
AGUAAAGGCCUGGACUAAGGACUCUCGCCUGCAUGGGAACC  
>N2245  
GUCUUGUACCUGUUCUUCAGACUGGUGUGGCCUCAUAUGCU  
>N2246  
AGCAUUCUGGUUAACAACAGACUGGCAUUAUGUAGCUCAAC  
>N2247  
ACUGUUUUGUCCUUAAGUAGACUGUGCCAGAGCAUCACAGA  
>N2248  
UUCAGAUUCACACCACUAAAACUCUCAACAUCCAUUCUAG  
>N2249  
UCUGAGUUCUAGGGGGUUGAACUCAGAGCUUUGUGCUUGUG  
>N2250  
CUCAUGCCUAAGAUAAGAACUGAUGAAUGGGACCUCAUG  
>N2251  
UUGUGAAUAGUCUCUGAGAACUGCAACCAGUCUAGGUUAG  
>N2252  
UCCAUACCGGACAAGGAGAAACUCCACAUAAGUGCUGAUUU  
>N2253  
CAUCUUCAGCACUAACUAAAACUCAUCACUUUGCUGAGGCC  
>N2254  
UUCUGGUGAUGACUAGGCAAACUGGAGAGCUCCCUUGACAC  
>N2255  
ACUAUAUGUUCUCUGAAAGAACUAUCACUUUACUGAAGUGC  
>N2256  
UAGUCUAGUAAGAGAU CAGAACUCAAAAUCUGAAGUAUGUU  
>N2257  
AGAUCUGGCAGGCUCCAAAGACUUCUAGGACCAUAGGGAAU  
>N2258  
AUGUACAAAGAGCUCAAGAAACUGAACUCCAGAAAUUCAAA  
>N2259  
CAGCCAUGUCAGAGAAAAGGACUUGGCUAUUGC UUUACAUG  
>N2260  
GGUAAGUAGCCUUUCAAGACUUGAUUUUGUGAUUUUAUG  
>N2261  
AAUAUGGGGUCCUAAAAGAGACUCCCCAUAAAACAGGACUC

>N2262  
GGAACUCGCACAGGGUAGGAACUUGGAAGCAGGAGCUAAUA  
>N2263  
AAGAGCAGAAAGAAGUAGGGACUGCGGCUCUGGUCCAGGUA  
>N2264  
CUAAGGACAAGUCUGGAGGAACUCUGGAAAAGCCACUUUAC  
>N2265  
GUGUAGGCCAUUUCUUUCAACUCACUGAAAUUCUUUUGUC  
>N2266  
CAUCUAAUGUGUGACAUUAAACUCAUUCUCACAGUACAGUG  
>N2267  
AGAUUUCUUUGGGAGACAAAACUUGAGGUGGCAGAAAUGAA  
>N2268  
UAGGGUUUUGUCUGGUUUGAACUUGUGUGGACUAGAUUUGG  
>N2269  
CGGCUGAAGCAGUCCUGAGAACUACUUGAAGUUUACCAGAC  
>N2270  
GAGCACACAGCAGGGGAUAAACUCUCUCCUGCAAGGAAUGC  
>N2271  
CUUUGCAGACUAUAAAAUGGACUGUGAGGUUAGUUCUGGAG  
>N2272  
AGCAGAAGGAAUCAUAAAAACUUUAGGAUUCUGAUACCA  
>N2273  
UGUGUAAUACCAGCCUUUGGACUUGAUGCCAACCUCUAAG  
>N2274  
AAAUAACAUAUAAUACAAACUGAAUUGACCUUGAACUUU  
>N2275  
GGAACUAGAGGCAUCAAAAGACUGGAGUCCCAUGGAAUUU  
>N2276  
UGGGCAAGUUUACAAAAGAAACUGCCUACGUUUUGCUUGGC  
>N2277  
GGAACUCCUAAAGCUGGUAAACUCCUUUAGUGAGGAGGUUG  
>N2278  
GAAAACAUGUUCUGAGUCAACUCUCAUCUCCUUUAAAAU  
>N2279  
UUUCCUCUUGAGAUUCAAAAACUGUAUUCACUCUUGCUCU  
>N2280  
UAGACAACUUGUAUCAAAAAACUUGCUCACUCAGAGAACGCA  
>N2281  
AACAGAAAGGGAAUAGUGGACUGGGUGAGAUGUUUUGUGA  
>N2282  
UGCAGGUAUGGCUUUUUAAGACUUAGUUGUUUUUUUUUCU  
>N2283  
CUCAUGAAUAUAGAUCCAAGACUGCAGGGUCAUGAGGCCAG  
>N2284  
AUCCAGAAUAGCAUCAGAAAACUAAAUAGAAUUUUUAUCAC  
>N2285  
AUAGCCUCUUUAUCCUGGAACUCAUGAUUACAAAUUUUU

>N2286  
UCAAAUAUGCUGAGCAGGAAACUCCACCAGACUGUUUAAGA  
>N2287  
UGAGAGAGGAGCAAGGGUGAACUUCAGAAAGGGCUAGCAUA  
>N2288  
UGGUCUGAU AUGUGGUAGGAACUGAACCUGAAUCUUGUAUA  
>N2289  
AAGUAGAAACAAUAAAGAAAACUCAAGUGAGGCAACACUG  
>N2290  
AGUAGGGUCUCUGCUUAAAGACUCAAGUGAGGCAGGGCUGG  
>N2291  
AGAGACACAGAUACAUAAGAGACUCAGACACAGACAUACAAG  
>N2292  
AGUUAUUUAAGGCAGAGAAAACUUAAGUAUCUGUCUAAAUA  
>N2293  
CAUGUUUCCUAGACUGGGACUCAUGACUUUGAAGAUUUU  
>N2294  
GUGUUCUCUUGACCAUCAGGACUUCUCUCCUGUCUCUCCC  
>N2295  
GACCAGAGUAGAUACUUAGAACUAUAGAUAGCUGAGUUACA  
>N2296  
GGCUGAGAAGCACCUAAGAACUGUUCAAAGUCCUAGUGA  
>N2297  
GAUGUGAAGAUUCAGGUAGAACUGAGAUGUGGCUCAGUUGU  
>N2298  
UUGGAAUCCACAAAAGUAGACUCUAAUGCCAGUAAAGGUA  
>N2299  
CAGUCAACAUUUGAAAUAACUUGACUUUGACCUUGACUC  
>N2300  
UUCUGUCCUGUUUGUCAGAACUAGGCUCUGUUGCUUCCC  
>N2301  
CAUUUUCUUUCAGGACAUGAACUCUUCUAAAAUUUGCAUA  
>N2302  
UAAUGAUUUUAAAAAAAAAACUUUAAUUUUGUUAACUAG  
>N2303  
GUGAGAUUAUGUCUCCUAAGACUGUCAAGUAGCACCAUUA  
>N2304  
UAGCUCAAUGUCCUGUGAAACUCUGAAUAGUGGGAAUAGG  
>N2305  
AAAACAUUUCAUUAGUCAGAACUGGGAGGAACAUAAACUUCA  
>N2306  
GUAUCCACCAUUAAGCAAACUGAAAAACACCCAAAUGAU  
>N2307  
GUGGAAUAGUGCAAUAUAAACUCCCUGCACUAUGCUCUG  
>N2308  
CCUAUGGGAUUCUUGUAAGAACUGAGCACUGUCAAGCUUGU  
>N2309  
AAAAAAAAAAAAAAAAAGGAAACUAGGCAGAAUGCUUGCUG

>N2310  
UAAAUGGGACCAAAAAAGAAACUCCUCUUGUCACAUAAUUA  
>N2311  
CCUCAUAACAAAGACAAAAACUAUCUCAGAGUAAAAGGAU  
>N2312  
ACAGAUAAACCCCUAGAUAAACUAACUAAAGGGCCCAGAGG  
>N2313  
AUCAUGGGGGGAAAAUAAAACUAUUUCUAGAUACAAUUG  
>N2314  
AUUUGCAAUGCAUGCUGCAGACUGAGAAUUUAACUAUUGUU  
>N2315  
AAAAUCUUACCAGCUGUAAACUUGAUGGAGGAUUAGUAUC  
>N2316  
UUUGGAAUUCUCCUCACAGACUGUUGUGCCCUCUCCAGA  
>N2317  
CCCUGGGCAGUCCUAAGGAACUUCAUCCCUUAUCCCAUGA  
>N2318  
GGCUUGGUUAUAAAUUUAGAACUGGUUAUAGAAAAACAGCUA  
>N2319  
ACAGUGGUGUGGAAGUAUAAACUGUGAGGAGCCGCCAUGC  
>N2320  
UUACAACAAAAUUUUUAUAAACUAAUGCUUAUAAAACAUAA  
>N2321  
CGCUGAUUUGUGGCUUAAGAACUGUUUAUGUGGUGGGUGGG  
>N2322  
GUCAAGACAUCAAUUCAGAAACUGGUUGCAGGGUUAGCUGU  
>N2323  
AUACGUUACUGGUGCAGCAAACUGUAGUUAAGUAUACACAC  
>N2324  
UGGAAUCAUCUCUAAUUCAGACUCUGCUCUCCAGAAUUACGA  
>N2325  
ACCAGACAUGUAAGUUACAGACUUCGGUAUCUACCAGUCU  
>N2326  
AUACCAUUUAUUCAUUUAAAACUGUGACAGCAUCCAUUCUU  
>N2327  
UCCUGGACUGAGUAGACUGAACUCACAUUCAAUUUUAGAUG  
>N2328  
UAACCUUGC UAAAGACCCAGACUUGUAUUAAGAGUUUUAAA  
>N2329  
CCCUGCCCCAAGGGUCCAAACUGGGAAAAAAAAAAACAACU  
>N2330  
AUUGCAACCACUUUGCAAAAACUCCUUGGCUGGCAACCAUA  
>N2331  
AGUGUGGGAUUUAUCGAAACUCUUGCUUUCUCUAUUGCU  
>N2332  
AGCUUUUGCCUCCAUGAGAACUUGGCCUUACUGUGCUUCU  
>N2333  
ACCUACCAAUUGCGGAAGAAACUCUCAAGCAUGAACCUAU

>N2334  
UAUAAGUAGAGUAAGAUGGGACUAAAUACAAGGCACUGAUC  
>N2335  
UUUUUUUCAUUCAUUAGAAGACUGUUCAGUUUCACAAAGU  
>N2336  
CUGUCAUUCUCUACCAGAAGACUGGGGAGACUAGCUCUCUC  
>N2337  
AAUUCAACAAGCAAUAAAAACUGUAAUUAUGAUUAUCUGAA  
>N2338  
AUUUUUUCCUCUGAGUAUAGACUGAGACAAAUUAACUUG  
>N2339  
CAAUAUAGCCAGAACUCAAACUAAAAACCAAAGCACCCAA  
>N2340  
UUGGACAGGGUCUCUCAUGGACUCAAAACUCACCAAGUAGA  
>N2341  
GAAAGGUUAAUUGAAAGUGGACUCCGUGAUGCAGCAUUCAU  
>N2342  
AGAUAGCAGCAAUAAAAGAACUCAAGGCUGAAAUCAACUG  
>N2343  
AAAUAUCAAUGACUAGACAAGACUGCCUACUUUCUCCCUACC  
>N2344  
AUUCUGUUUGUCUGAGCAAAACUUAUUUAUAGGGGAAGCAA  
>N2345  
UAGUUCUAGUUGAGCAAAGACUAGAAAUCCCAUGAUCCU  
>N2346  
AUUCAUUGUGUCCUGUGAGACUGCUACAUAUUUGGUGCUA  
>N2347  
UUUAGUGUGUUUUAGUUGGAACUAGAGCUAAGAUGAUAAUU  
>N2348  
UGAUAAAUAUUUGAAUCAGAACUGGGAACUCAAUACAAGG  
>N2349  
UCAAGAUGGACUUAGUUGGAACUUCUACUUUGUUCUGUUGC  
>N2350  
AAGGCUAUAUGAUCACAAAGACUGUGGAGGCAAGAGGAGAC  
>N2351  
AAAAAAUAAAAUAAAAUAAACUCCAAAACAGAAAAUCCA  
>N2352  
GCUACCAGCAUUCAGUGGAGACUUAAGUGGCCAGUGGGU  
>N2353  
CUUCUCUGACUGAACCCAGGACUGGCAUUCUCUGCUGUAU  
>N2354  
GAAAGCUGUGAACCCUCAAACUACAAUGACAAUUGACCUG  
>N2355  
AUUAUUAAGGGAGUCAAGAAACUGUGGGUAGACCAAUGCCA  
>N2356  
AGUGAGACCUGGGACCAGGAACUUUGGGUACAAGAUGAGAA  
>N2357  
AAAGUAAAUGGUAAAUACAAACUAGAUAAAGAAUAUUGGUU

>N2358  
CUCCUCCUAAGGACAUGAGGACUAUCUUUUUCAUAAGACGGC  
>N2359  
CAAUGUUCUCCUGGAGUGGACUUGAUAGAUUUUAUACAAAA  
>N2360  
UAAGGUCCAUCCUCCCAGACUCAUAGAUAGUAUGCUCAA  
>N2361  
GAGUAGUGCUGGUUUCUAGAACUUUUUUUUUCUCAAUUA  
>N2362  
AAAGUCCAUAAGAUGCUGAGACUUUCUGUAUAAAUCCUAAA  
>N2363  
ACAAUCAAU CGCUGUUGAAAACUUGGCCACGAUCUCCACAU  
>N2364  
GAUUAUUUUUCCAGGGACUCCAGACUGCUGUAUUUAU  
>N2365  
CAAUGGUUUUGUGUGUAAAACUGUAAAAAUGAGUCACAAU  
>N2366  
ACCAUGAGGCUCACAAAAGGACUUUAAAGUCCUCGAACUA  
>N2367  
CAAGGACUACUCAAGUGAGGACUGCCUUUAAAAGAUUAAA  
>N2368  
AUUUUCUGGUGAAACAUUAGACUUUUUUAUUGUGUAGAACA  
>N2369  
GCUUGCCUGAAAGUGUUUAGACUGAUUUAAUUGUCUGACAU  
>N2370  
ACUUAUAAAUAUUAUCCAGACUUGUAUUUGACCUAUUCAG  
>N2371  
AAACUGUUUGGAUUUCUAGACUUGUUGCUUAAUCCCAUUA  
>N2372  
ACUUCUUAACAACAUUUAAAAACUACCACUCUCUACCUAUCC  
>N2373  
UAUAAAGUUUGUUAUUAUAAACUAAGGAAACUAGAUUCAA  
>N2374  
GUGUCUGAUGACUAGAGGGGACUAUCUUGGGUUGAUUGAUG  
>N2375  
GGAAAGAGUUGUAAAUCUGAACUCAUAUGGAAGUUACUCUC  
>N2376  
UAACUUAAGCUCUCUUAAGAACUGAAAUGUGUCCAUGAAUA  
>N2377  
UUGAACUCUAGCUUUUAUAAAACUUGAUUGACAACACCCUG  
>N2378  
UCCUGGCCUUGUACAAGACUGUACUGUCAGCCUGUGCU  
>N2379  
GUUGCCACUGUUAGCUGAGAACUUAAUGAGCUCCCAACUCU  
>N2380  
UGCUGAUACAAAUAUUAUAAACUUACAAAUGUAUAUAAAAG  
>N2381  
AAUUCAUUUACUCCUAGGAACUCAUGCUAGUUCAGGUUA



>N2382  
UUUAUUUUUAAAAUUAGUAAACUCUUACAAUCCAGAUUUUA  
>N2383  
GAAAGGAAAAGAAAGGAAAAACUUGAAUGAUUUUGUUACGU  
>N2384  
AUUUUCAUUGUGAUUUUGAAAACUAACUCCUCAUAAGAUAAA  
>N2385  
GAUCAUGAUGGGUUGAUCAGACUGUAAGUAAUACCAAUCCU  
>N2386  
GUCUGGUUCUUUUGUUGAAGACUAGUGGCUCAAAAGGCCGG  
>N2387  
GAAGAGCAAGCAUAGUUAAAACUAUGAGAAGUAUAUGUGAU  
>N2388  
UAAUCAGCCACCAAACACAGACUCUAUUCCAUACGCCAGCA  
>N2389  
AAUGGAAAAAUAGAGCACAAACUAGAUUCUCUCAUCACCA  
>N2390  
CUGAAAGAUGAGGCAGGAGGACUGAAAGUUUGAAGACAGUC  
>N2391  
AAUAAAUGCUCUGGAGCAGACUUGAUUAUGUUUUAGAGUCC  
>N2392  
UAAUGUUCUUCACUUACAGGACUGAAUUCAAACAUCAGCU  
>N2393  
CAAUUAAAUCUUAUUUUGAACUGAUGACAUAUCUGGAGAA  
>N2394  
GUGCUUUUCUAUUUUAGAGGACUUUAAAAAUGGAUAUUGU  
>N2395  
AUCUUUAGCACUGAGUUAAAACUAUGACAAGGAGGACCAGA  
>N2396  
UAAAGAACUCAUUUAACAAAACUAUUUAAAAAUGUCUUAU  
>N2397  
GCAACAAGAAUAAAAGACAAACUUUAUUUUUCUUUCUUUU  
>N2398  
GUCAAGCGGAAAGGAAGUAGACUGUAUGACAUCAGAGAAAA  
>N2399  
GUUAAAUAUCAUCACAAAAAGACUACAAAGCAUAUGUGUGUA  
>N2400  
UAUUUUGUUUAUAGGACAUAGACUAAAUAGACAGUGAGGAGG  
>N2401  
GAUGGAUUUAAAUAUAGAAAACUAAGACACACUACCUCAGA  
>N2402  
GUUGUCGCUAUGCUUUAAAACUCUGGCCUCAUGCAAACA  
>N2403  
GGAGUACUGAGAAUUUUAAAACUUUCUUUCAUUUAAAUUA  
>N2404  
UAGGCCUGCUGCCAUCAGAAACUGCCAGUUCUCCUGCAUU  
>N2405  
UGCUCUUUUUAGUUCUGGAGACUUUAGAGAAGAGAAUCAA

>N2406  
CCUUCCUAACAUCUGUAAAACUGAAGACUUUGACAUUAAU  
>N2407  
GGCACUUAUUCACCACCAAAAACUGAAAACUUCAUGGCAGAC  
>N2408  
UAUACCUAAGUACCACAAAAACUUUACCAGAGAACUACUAC  
>N2409  
ACCAUACUGUCCUGGAGUAAAACUCAGCAUUGAGCAGGAUCA  
>N2410  
UUUAUGCAUUUUGUCCAAAACUGGUCAGAUUCUCAUAUGU  
>N2411  
UUUACAAAAUAUUAAAAUAAAACUGACUAGUGGGUUUUUAUUC  
>N2412  
CAUUCUCCAAGUCACAGUGGACUUCAAUUGGGUUCUAUACA  
>N2413  
CAUUUCUCCAACUCCAUAAGACUACAUGCAAUUCACAGAUU  
>N2414  
CAAUUUCCAUAAGACUGAAAACUCAGUAUUUUAAUACUUCA  
>N2415  
GAAACCUUCUAGAUAAACAAAACUAAUUGUAUCUGCUGAAAA  
>N2416  
AAGUAAUGGCUAAAAUUGAAAACUUUUGAAGAUGAUAAAGCCU  
>N2417  
CUGUUUUAAUUGC UAAUAAAACUUUCACAUUACACAAUAAU  
>N2418  
AUAACUCAAGGCUGUGAAAACUAAAGAAGAAACAUUAGUC  
>N2419  
GUGAGCUCAAGUCAGUAUAAAACUGUACAGAGAGUCCAUGG  
>N2420  
AACAUUCUGAGUCUAAGGAAGACUUAUUC CCAUUCAAAACUC  
>N2421  
AGAUUUACAUGAAUUAUGAAAACUCUCUACUUUCUUGUAAU  
>N2422  
UAUUCACUUCUAUUCUAUGGACUUCAUACUUUAUUCUACU  
>N2423  
CUGCAUUAAAAAAAAAUGAAAACUUCAUUUCAGAUUCCUUCU  
>N2424  
UGAGCUCAUUGGAGAACAAAACUAAGCUUAUGGCCAAGAGG  
>N2425  
AGGAGUGGAACCAUGUCUAGACUGGUAAAACCUUGUCUGUAU  
>N2426  
AUGACCAACUUUCAAUAAAACUGACAGUAAUAAAUAUA  
>N2427  
ACACAUGCAGUUUAAGAAAACUGUCAGGCAAAACCAAGGG  
>N2428  
ACCCUGACUGGUGAUGAGAAAACUCAUAUUUAUUCUGUCAAU  
>N2429  
GUGACUAGAGCAGGUUCUGAACUUCUGGAUCUCCAGGGUU

>N2430  
AUCAACUGCAGAGGAGCUAGACUGGUUAUUGUAGAAAAACUA  
>N2431  
AUUAUUC AUGAUUGAUCAGGACUGUUGUGUGUAUAAAAAGA  
>N2432  
GUUUAUUACCAAUUGACAGACUCAGGACAGCAAGCAAGUG  
>N2433  
AUCCCAUAUACAAUCACCAAACUCAGACACUACCAUGGAUG  
>N2434  
CAGCAACUAUAAUUUCAAAAACUAUUUAAAAGUUAGAUACA  
>N2435  
UCUGAAUUGACUGGCUGAAACUCAACAAUUUUGGGGGGAA  
>N2436  
GAACAAUGUGUUACCUCUGAACUCUAAGCCUCAUUCAAAUA  
>N2437  
UGAAGCUUUUAUGAAGUGCAGACUAUGAGAAAGAAGCCAGAC  
>N2438  
AUGUGACUGAGAGACCAAAGACUUCAGCAUUACCUACUAAC  
>N2439  
AAUCAAAAUGUAGAACAGAGACUGAGGGAAAGGCUGUCUGG  
>N2440  
AUCUCAUAUACAGCCAUCAAAACUUGAAUGCUAUUGUGGAUG  
>N2441  
ACAUAUGUGGCAGAGGAUGGACUUGUUGGACAUCUGUGGGA  
>N2442  
CCCGGUUUUCCUCUGCAAAAACUCCUAUCCCAUCCUCCUUC  
>N2443  
UCCUUUCUUGGCAUCUGAGACUUUCUGUUGCCUAGCCCAA  
>N2444  
AGCUAAGCUGAAGUGGUUAAAACUUUAUUGUCUGGUAGAAAU  
>N2445  
GGCUGGGUAUAGUAGCCUGGACUUGCAUUUGUGUUCUCCUA  
>N2446  
CCAGCAACAUGGCUACUUAGACUGGAAUAUAAAUGUCUUUA  
>N2447  
AUAAAUUGUGAUUACUUAAGACUAACUCUAUUCUUUAAAGU  
>N2448  
AAUAUGUGAGGGAACACUAGACUGACCAGCACUAUCAGUAG  
>N2449  
CUUAUGAACUCAUCAUAGAAACUAAUAUAUUAUUGUCUUGC  
>N2450  
AUGCAGAAUGAUGAAACUGAACUAUAAUAGUUCAUACACUG  
>N2451  
AUAACAAUAAUUUCUAUUAGACUGUGAAAUGAUGAUAGCAG  
>N2452  
AACUUUAACAGAAUAAUAAAACUUUUUUAUUUAGAGAAAAA  
>N2453  
ACCUGGGAGACUCACACUAAAACUGUUUUUAUACCAAUGUUAA

>N2454  
UAUAGGAUAGACCCAAUUAACUCAGUAAUUUAUUAACAG  
>N2455  
AUCUUAUUUAUGUGAUUAAAACUACCUUCAUCCAUGUCUU  
>N2456  
AUCUUGUCAUGGUCUGCUGAACUGACUGACUUAAAUCACA  
>N2457  
CAAUUUGAAAACUGUCUUGAACUUCUCUCUUAAAAGCAUUG  
>N2458  
AGGAGAAAUUUUUGGUAGACUGAAGAUGAUUCCAGGAAA  
>N2459  
AAUAUAAUUUACAUUCUAAAACUGAAAUAGAUGUUUUAAAU  
>N2460  
AAAUUUUUAAAAUUUAAAAACUAUAAAAAUUCUUAAAUUU  
>N2461  
GAGCAUAUUAUUAGUCUAGAACUCUCCUGGUACACAGAACA  
>N2462  
AAUACCUUCUAUAUAUGAGAACUAUAUUUGUGGUGUGUGUG  
>N2463  
AUCCUGGUUUCUGCAUUCAGACUAAUGUCCUUAUCCUACU  
>N2464  
CUUAGAUUUUAAACACUGAAAACUAAUUUAUAAAUAGAAAA  
>N2465  
UUUUUAUUAGGUAAAGGAAGACUUGUGCAAUCUUAUGAAAU  
>N2466  
ACAAUAUUAAAGAGGGUGGAGACUUAUGCCACAUCUCAAGU  
>N2467  
CUGCUCUUCAUCAUGUGGAGACUCAACAUCUACCUCUCCU  
>N2468  
CUUUUCGGUUGGUGGUUCAGACUAUAGGAACUCCAGGUCC  
>N2469  
CUUCAAUUUCUUUCUUUGGGACUUGAAAUUCUAAUCAUAAA  
>N2470  
UGCUAAAUGACCUAGGGCGAACUCUACAAGAGAGGCCAGCC  
>N2471  
UUAAAAAAGAAAGCUUUGAACUCACCUUUUAGAUACAAUA  
>N2472  
UUAUAGAUAGAUAUGGGAACUUGAAGCUCAUGUCAGGGG  
>N2473  
UACAGUAUAUAUCCAUUCAAACUAAACUUUAAAAGUUUUA  
>N2474  
GUAACUAUCUAUGAUCAGAAACUACUCUUCUUGGGUGCAAU  
>N2475  
UUGUCCAGCCUUGAUUAUAAAACUUUUUGACUUGUCUUAUUG  
>N2476  
AUUAAAAGCAGCUUUUUAACUAUAAAUAUCUUUGAGUUA  
>N2477  
UUGUCUUCUCAGGAUGCUGAACUACUUUAUGGAUGUAUAC

>N2478  
UCAUCUCUGAAUGAACACAGACUGUGCAGUCUGCUACUGUA  
>N2479  
GGGGUUAUUUCCUAAACAGAACUCCAAUGGCUCAUGCUCUA  
>N2480  
AUUCUAUUGUUGUCUAUAAAACUAACAGCCUAAAAAGCUAU  
>N2481  
CUUAUUUAUAAUAGCCAGAAACUGGAAAGAACCCAUAUGCC  
>N2482  
GGGUGGGGGAACAUGGGGGGACUUUUGGAAUAGCAUUGGAA  
>N2483  
AACUAUCUAACAAAUCAGAACUUAUAUUGCUGUCAAUUCA  
>N2484  
AAAACAGUAGUUUCUUGCAAACUAUUGUUUCUAAGUAUCAU  
>N2485  
AUUAAAAGAGAUACCAUGAACUAAAGCUGGACUACAACAA  
>N2486  
UUAUUUAUCUUGACUUUUAAACUAGGGUACAGAGCUAUGUC  
>N2487  
UGGGGGGUAGGGUCUGGGGGACUUUUGGGAUAGCGUUCUGA  
>N2488  
AUUAAGUGAGGUUAAAUGGACUCAGUAACCUUUAUUCAUA  
>N2489  
AAGUGAUUAAAACCUAUCAGACUUUCUUGUAUACUGUAGC  
>N2490  
ACUUAGAUAAAGAACUAUGAACUCAUCAAGAUAGGAUAAAU  
>N2491  
UAUCUGUGAUGUCGUUUUGAACUUAUUAAAACUUUGGCAA  
>N2492  
UAAUUUAUGUAGCUGUCAGACUGAUACCCUAAAUUACAUU  
>N2493  
CCUCUGAUGACUGGCAAUGAACUGUAUGAACUCACUGACCA  
>N2494  
CCAAUAUCACAAUAAUAAAACUGGCAAAAUGCAUCUGGUA  
>N2495  
UGUAAAAUUAUUUUUCAGAAACUCACACAGCCACUUCAUAG  
>N2496  
AUAAAGAAAGCCCAUGAAGAACUUAUUGGCCUGUCAUUCU  
>N2497  
GAAACCAUCCUUACCACUGAACUAAAAUGACUUCUUCAUUU  
>N2498  
AAGUCUACGGAUUCCUAAAACUGUUCCAGCACUAAUAAA  
>N2499  
UCUAAAAACAAUAGUAAAAAACUGUACCUGAAUUUUCUUUG  
>N2500  
ACUAUUCUGUUGAGGUUUAACUGUCCA AUUGUGUGAAGCC  
>N2501  
CAGUCUGAAAUCAGAGCAAAACUUAACAUAAGCAAUAUGU

>N2502  
UGCUGGGAAACCUGGAGGAGACUUAGGGACUCUAACUUUUU  
>N2503  
GUCUGAGACAUCUCAAGUGAACUGGCUCUGUUGCAAUGACAA  
>N2504  
AUAAUUUCAUAUAAUUUUGGACUGGAAGAUCAAGGAAAAUU  
>N2505  
CCAUAUUCUAUACUAUAAAGACUAAAGAUUUUGAAAUGUUA  
>N2506  
UGUAUCAUUAUUAUCUUGAGACUUCUUUGCAUGAAUGUCUA  
>N2507  
CAUAGCAAUAGGGUUUUUGAACUUACAGUUGUUGACAUUCC  
>N2508  
UAGCAGCAACUUCAUUGGAAACUACACAGAACUAGCACAG  
>N2509  
UUAGGGUGAGGCUGUUGCAAACUGGCUAAAUACUGUGGAAA  
>N2510  
CAGUCUGUCUGUUUUAAGAACUCUUGACUGUGUCUCCUAC  
>N2511  
UGUCUGAACAAAGAACAUAAAAACUAUCUACUGAAUCACUAAA  
>N2512  
GCUGGAAGGACUAUACAGAGACUGCUCCACCCGAGAUUCCA  
>N2513  
AUUUUAUGCUUAGUUUGAAAACUGAUGUCUAUUUCCUGCUG  
>N2514  
UUCAAUCUACAACAGGGUGGACUCAUGUCCAAGCUAUAGAU  
>N2515  
CCCAAGAAACUGCAUUCUAAACUUAUUUAUUAUCAAUUGU  
>N2516  
GAGGUCCUUGAUCCAUUUGGACUUGAGCUGAGAAGCAUAAU  
>N2517  
AUUUUUUUUAUAAAGGAAGACUACUUUUUAAAAAAGUUA  
>N2518  
UGGUAGAACUCUUCACUUAACUAUCUGAUCCUCGGCAUUU  
>N2519  
AUGUAUCUUUUAAAAAAGAAACUCUCUCUCUCUCUUUCUCU  
>N2520  
AGGGAUAUAUUAUAAUUUGAACUAAUACAUUUGAAUUUUUA  
>N2521  
UAGAAUCAUUGCAAACAUAACUCUUAGAGCAUAAUUCUUC  
>N2522  
UUACUUGAUGAGGAGUGAAGACUAAUCUUAUAUGUGGUUUA  
>N2523  
UCCUGCAAUACCUCUCCUGGACUUAUAUCUAGAAGAUGUUC  
>N2524  
UCAUUAACUCUGACCAAGAAACUCAUUCACAGCCAAGGGAG  
>N2525  
CUUCCUGACUGCUCUUGAAGACUUCAAUAUACCUGUGCCCU

>N2526  
GUGCAUAACUUGCUGGAGGAACUGACUGAUGUCUGAUUUGA  
>N2527  
AAACAUAUUCUAAAUUUAGAACUUAACACUACCUGGAAUUU  
>N2528  
AAUCACUGAUUUGAUAGAAAACUUCGCCAAAAAUGGUGCAA  
>N2529  
UAAACUCUGUGGUUAUAGGAACUUAGAAAAUUCCAUUUAA  
>N2530  
GAGUACACACAAGCCUGAGGACUCUUGGCUCCCAUUUAUCU  
>N2531  
AAAUGAAAAUGGACUUUAAACUGGCAGUAAUUUAAAUAUUU  
>N2532  
AAUUUUGUCAUGUGAUUUGAACUAGGAAUGCCACCUUCCG  
>N2533  
AUCAGUGUUGGAUAUCUGGAACUCAUGAAGAAUUUAGAAU  
>N2534  
UCCACAAAGGAUCUUCUUGAACUGCACACAGUUGCCACUUA  
>N2535  
GAAGGCUAUUAGCAAACAAACUGGAUAACUAGAUAGAUAU  
>N2536  
AUCCUGCAGUCCCUACUUGAACUCUCAGGUUUUAUUUGUG  
>N2537  
AGCAUAAGCAUGUUUUAUAAAACUAAAUGUUCUAGUAAAGAA  
>N2538  
UUGUGAAUGAAAUAUUCAAACUAUUGGAAAAUUUAAUGAU  
>N2539  
AUACCACCCAAUAACCAUAAAACUAAUGGUUGCUUAAGCUUU  
>N2540  
UUUGAAUAACUAGUCUUCAGACUGCAAAGAUUUUGUGUGAU  
>N2541  
AUUGGUGUCCAUGUUGGGAAACUCACAAAGAAUUAUAAAA  
>N2542  
AGAGCACUUAUAUUUAUGAAACUCACUAGCCAAAAUACUUA  
>N2543  
CAAGCUAAAUAGAGAAUUAACUAGCCAUAAUUAUGAAUCA  
>N2544  
GUAAAGCACCAUCCAGUGAGACUGAACUAAAUUUAUGAGAC  
>N2545  
CCUGAUAGAAUUACAGAAAAACUCAACCAAACAGGUGAAGG  
>N2546  
UCUCCAAUAAAAUAUUUAGACUAACAGACUGGCUAGGUAA  
>N2547  
CUCUCCUUAAAAACUCUUAACUCUUGUAGUACAUUGGCU  
>N2548  
CAAAAACAAGAACUCUGAGACUUUUGUAGUUCUUUGGAGA  
>N2549  
UACACCUCUAUAUUUGUAGACUCUGGCAGGAGACAGCUCU

>N2550  
GAUCCCGGGGUGGGGCAAAGACUUAUGAAGUUCUCUUAUGA  
>N2551  
AUUUUACUUUUUCUUUUCAGACUUAACAUGGUAGAGUAGA  
>N2552  
UUUAAUAUCUUUAUAUAAAAACUAAAGAUGGAGAAGGAAAU  
>N2553  
UACCUGUUUUUAAAAAAAAACUUUGUGAAAAGUAAAAUUAU  
>N2554  
AUGUACCUAACCCUCAAGAGACUGAAGGUCCCAUGGAGUUU  
>N2555  
AUUAAAAUAUAAGAAUAAAACUUUAUGCCUUAUGAUAGGG  
>N2556  
AGAGUUUUUAAGGGGUUAGAACUUAUAGAAAGGUUUUGAAU  
>N2557  
UAAUCUGUCAUGAAAAAAAAACUGUAUUUUCAAAAUAAUAA  
>N2558  
UUGUAUGUUAAGUCCAAGAGACUCCUUGAUUAUCUUAUUUG  
>N2559  
AUCAUGGCAAAAUUCAUCAAAACUCAAUUACACUGGGACCUG  
>N2560  
UCAGAAUCAUUCUGUUAGAACUCAAGGAGAAUCCCCUUU  
>N2561  
UCGUUUCGUGUUUGUGUAGAACUCAUAAGUGUGUGUGUGUG  
>N2562  
AUCAAGAAUGAUAAUUGGAAACUAGAGGACAGCAAUCAGA  
>N2563  
CCUUAUAUUAUUCUGUUGAAACUCACUUCUGUAUAAUUGCU  
>N2564  
AGGCUAACAUGGUAAGGAAAACUUAUUAGGAACUCAAUCCU  
>N2565  
AAAUAAUAUUCAUAGAAGAGACUACUAAUAAUUAUUUAGC  
>N2566  
CUUUCUGUAGAUCAGCCAGGACUCUAACUCAGAGAUGUGCC  
>N2567  
UGUUAUAUUGUUCAAUAUGGACUGCAUACUUCUGUUUUCUA  
>N2568  
GCAACACAUAGUCACAGCAAACUAUAGACAUUAAGAUAAAG  
>N2569  
AGGGUUACUCCCACUCCCAGACUUCCUGGCUUCCAACUUCU  
>N2570  
AGUUUUUUUUAAGGGGUAGAACUUUGAGCAGGUGGUCCCCU  
>N2571  
GUAACAGAACAACAAAUGAACUAAAUAAGAUAGAAUAAU  
>N2572  
CAAAAAGAAAAGGAGGGAAACUUAUACUCAUCAAAGGUA  
>N2573  
UUGAUGAAUUAAGGGCAUAGACUCAUGAAGGUCAGGAUCUA



>N2574  
AACUAUCCAGUACCCACAGAACUCCUUGGGACUAAACCACC  
>N2575  
CACAAGUUAACAUGCUGGAGACUGCAGAUUAAAUAUAUG  
>N2576  
CACUCAUGAUCUUGGAGCAAACUCUCCUGACUACCACAGGU  
>N2577  
GCCAACAGCUUUCAUACUGGACUAAAAUUAGAGAAGAGAA  
>N2578  
UUUUCAAGAAACAAAUAAGACUUAUUUGCUUAAGAUAAAG  
>N2579  
UUAAAUGUGAAUUACUCUGAACUUUGAAAGACAGCCACACC  
>N2580  
ACUUACCUUGAUGACAAUGGACUGACACUGAACCUGUAAGC  
>N2581  
CAUGGACCAAACACAUAUGAACUCAUAGGGAGUCAAGUGUU  
>N2582  
AAACAAACUCAGGCUAACGGACUAUGUACACAAAUGGAUU  
>N2583  
UUCUAAAAACUGAAACCAAAACUUCAAUACAAUGACAAAA  
>N2584  
UUUCUCUAAUAAAUGGUGAAACUCAGAUGUUAUUGUGCCUG  
>N2585  
GAUGAAAAAAGAACCAAAAACUAUAGCUUAAUGAAAGACU  
>N2586  
CAUGCUGUAGAGAAUAAGAGACUGUGGAAUGCAGAGACCUA  
>N2587  
GUGGGAGAUCUGAGACUAGGACUUAAAAUACCUACUUAAGG  
>N2588  
UUCUGGCAAUUUAAAUAAGACUGCUAUGUACAUAGUGGAG  
>N2589  
UCCUUGCUCCAAUUUGGAAACUGGAAUAUUUUGUGUCUGA  
>N2590  
GUGAUCCUGAUGGCAAAGGACUUCUCAGGAAUUCAGGAAG  
>N2591  
GCCAGAGCUCUGACAUUAAACUACCUCGUGUAUUUACAUC  
>N2592  
UUGGCAAAAUGCAACUCAAAACUACAUUGUGAUUCCAUCUU  
>N2593  
AGAGGUGAGAGACUUCAAGGACUCAAUUGGUAGUGAACUUA  
>N2594  
CAUGAACUCAUAGAGACAGAACUCUCUGCUUGUAUUUUGGU  
>N2595  
CAUAGAAUGACAGUUUGUAAACUUUUGGGUCUCUGACCCUU  
>N2596  
ACCACCCAUUACAACCAGGGACUAAGACAUCAACAAUGGAG  
>N2597  
UUGCGUUUGUUUCAAGCAAACUCUAAUUUCCAAGAUGCC

>N2598  
CCACACUCUCACCUGUGCAGACUACUCUCAGUGGAGUCCUG  
>N2599  
AGCCUAUUCUAUAAAAUGAAACUCAUUCUGACACUGUAUG  
>N2600  
GAGAUGAAAGCAAGAACAGGACUCUCAAGGUAGUAUAUGCU  
>N2601  
UAAGAAAGAAAAGCAGAAGAACUGACCAGAGGUUUUCUGUC  
>N2602  
AUGAGGGGUUUCAAAACAGAACUCAGAGAAACUGUGAGAAG  
>N2603  
AUACUUAAAAUACUUUGCAAACUAUUUUUGGAAUAACAAAA  
>N2604  
UGUGCUAACAUGCUAUUAAAACUAACACCAUCCCAAGAAAA  
>N2605  
AUAGUUUUGAUAAUAAAGAACUCAGAUUUAAUUCAGUAUU  
>N2606  
UAAGAAUGAAGAAAUGACAGACUAUAUAGGGCAGUUUGCUA  
>N2607  
AGAUAAAACAUUUUGAGAAACUCUGGUGUCAGUUUAACAG  
>N2608  
CAAAGGAAUUAUCAAAGAAACUGUGAAGAUAAAGAGCAA  
>N2609  
UUGCCAGAACAUCUAAACAAACUUCAUUGCUACAUAUGAA  
>N2610  
UUCGGAUGACCCCAGUAAAGACUCCUAGUAAAGGGGGAUUU  
>N2611  
GUCUUGAGUCUAAUUAUUGAACUGGUUAUAGAAAACAGUAAA  
>N2612  
UUAACCCCGCCUUUGAAAGACUCUUCUGUGUAACAAAUU  
>N2613  
CAGCUGCCUACAAUUUAGGGACUAUGGCCACAAUGUGCUGG  
>N2614  
AUGCUUUGGAAACAAGAGAGACUUGCACUGAGGGCAUUUUA  
>N2615  
CUAAACCAGACUGGUCUUGGACUCAGAUCAAAGAGUAUUCU  
>N2616  
UUUAUUUAACUUUUCUCAAACUAUAAUCUUUACUCACUA  
>N2617  
AGGAGCGCCAGCAAUGAAGGACUAUCUGUUCAAAUACAUUG  
>N2618  
AAAGAACAAGGUUACAAGACUGGCUCAGGGUUUGUCGGG  
>N2619  
UACUGCAAUAAAAGAAUGAAACUCAUUUUACAUCUGAUCAU  
>N2620  
CUACUAAAAAGUGUAAACAAACUAUUUUUGUAGAUAAAUAU  
>N2621  
UUGUGCCAUGUGUGCAGCGGACUGUAGAGUUUGAUGUGAGG

>N2622  
UGAUUAGGGGACCAUUAUGGACUUUUUAUUGAUUGCCCUUCA  
>N2623  
AUAAUUUCUGUUUAUUCUGAACUUUUAGCUUAGCAAGCAGU  
>N2624  
GCAUCGCAGUCUUAUGAGGACUGAAAUGCCUUUAUCUCAG  
>N2625  
AAUAAAUUUUGCAAUUACAAACUAGGGCACCAUAGAAUUUA  
>N2626  
UUUCUAAUAAUCCAAUAUAAACUUGUUCUCAUGUAAAUUAA  
>N2627  
CUUUCACUACUAUUACCCAAACUGUCUUGAACCCAUACAGU  
>N2628  
AGAAUACUCUGCCACUGAAACUAAGGAGAGUGCUACCCUC  
>N2629  
UGGGGCUUUUAGAUCAUAAACUUGGUCAUGAUUUAAACUUU  
>N2630  
ACCAACGUAUCAUUGAGAAGACUGUUGUCAAUCCCAUGU  
>N2631  
AUAGGAAAUCAAGAAGUUAGACUCCAGAGAACC AAAUAACC  
>N2632  
CUACAAUGUAUGGAUGAAAAACUAUUUUGUCUACUAAAGAA  
>N2633  
AUAGAGGAGUUGGAGAACGGACUGAAGAAGCUAGGGCAAUU  
>N2634  
UCUGAAGUCAUCAGUUUAAAACUUUCUCCAUAUACCUAAAU  
>N2635  
GAAACAGUACAUGCUACUAGACUGCUCAUAGUCCACAUGA  
>N2636  
CUGACCCAAUAAUGGAGGAAACUAAGAGCUGCCUCCUGGG  
>N2637  
UUGUCCCCUCAUGAAGGGAACUAUGAAAUGACCAAUGUGG  
>N2638  
AGCAAACUGUCCCAUUUAAAACUGAUUCUGCUUCUGAGUUU  
>N2639  
CCAGCAUUACAAGUUUUAAGACUAUGCAUGAACACUCAAU  
>N2640  
GGUUCUUUGCAGAGAUUUAGACUUACACUCACUGUUGAAUA  
>N2641  
AAGAUAAAACUUGCCAUAAGACUCUGACAUAAAGCCUGACU  
>N2642  
UAAUAUUAAGCUAGUAACAAACUAUUGUUGUAAAAUAUGA  
>N2643  
UCAGCCACUUCAGUUGAAGGACUACUCAAUUCUGCACAU  
>N2644  
CCACUAAUUCUGCUAAGUGGACUUUCCUCAUGACCACAAA  
>N2645  
GUGAGUGC UUAAGAUGC UAAACUAUGUAAAAUAU AUUUGAU

>N2646  
GGUUGUAAAAGGUGUCAAAAACUUUGACAGAACAUCUUUUA  
>N2647  
AAUUGAAAUAUCAAAAUAAAACUGAAUUAUGCCUAUCAA  
>N2648  
UGACAGCUCCUACUUCCCAAACUCCAGCACCCUCCUCUUA  
>N2649  
AAGAGAGAGAAAAAAGAAAACUGACUGUUAUGUGGCCAG  
>N2650  
UCCUAAUUAACAAAUCAGAACUGAAAAGGGAGACAUACA  
>N2651  
GCUCCAAAUAGAUUUUAAAAACUUGGUUAGUGCAUAUAUG  
>N2652  
GUUUCAGGUAAAUAGUUUGAACUGAAAUAUUCUUCUCUGU  
>N2653  
UGCUGCAGAUAGAAGCCUAAACUUUGUCUUGUUUGUUGAUG  
>N2654  
UAGCUGCAUAUUAUGGUGAAACUUAUUUAAAUGCAUUGUC  
>N2655  
CUAUUAUUGCAUGAUUAUAAAACUUUAUGGUUAUAGGAACUAU  
>N2656  
AAUGGUGUCAGCAAUUUGAGACUGAUUAUGGGAUGGAUCCA  
>N2657  
AUUUCUUUAAGGGAUAUAGGACUGGUUAGAUCACUAACCUG  
>N2658  
UUUCCAUUGCAUAUAUUAAAACUUAACAGCAAGCAAAAUA  
>N2659  
UCCUUUUGUCUCAGCUACAAAACUUCAUAUCUGUAACUCCUU  
>N2660  
GGAAACCCAAACACCUUAAGACUGAUAGUGGACCAGCUUAU  
>N2661  
UGGGUAUUCUGAUUAAGUAGACUCUUUCUCCAUUGGAAUA  
>N2662  
GCAUGGUUCACAAGAAUGAGACUGUUUUCAGCACAGAUCCU  
>N2663  
AUGUAUCAAUAUGAAUAAAACUCUUUAGUCAUUGAACUA  
>N2664  
ACAUUGGCAUUGAGAAGUGAACUGAUGGAACAAACUGACCC  
>N2665  
UUUGUGAAGUUCUGAAUAAAACUGCCUUGAGAAGGAUGUCG  
>N2666  
ACAAAGAAAAAAAUCAAAGACUAUAGAAUUAUUGAAAAU  
>N2667  
AUAUCUGGUGUUCGAACCAGACUCCUGGCAGAAGUUGUGUU  
>N2668  
UUUUAUAUAUCUUAUUUAAAACUUUUCUAUAAAUAUUUU  
>N2669  
UUUAUCUUAUUUGACUCUGAACUCAAAACAUACCCCUUAC

>N2670  
AAUUAUAAUUGCUUUGCUGAACUUAAGCUUCUCCUUAUAGU  
>N2671  
CAAUUGGUCAGAUGC UUUGAACUGAUUAUGUGAAACUGACC  
>N2672  
UUCUAAUCUCCUUGUACAAAACUCAAGUCCAAGGGGAUCAA  
>N2673  
GCACUGCAAUCAGGAUGUAAACUGAAUAAAUAACUAAAAU  
>N2674  
ACCAACCACUGAGUGAACAAACUAGAUA AUGUCCA UUAAGU  
>N2675  
GGACCAUUCAGAAGUCAGAAACUUUAAGUUUUAACCAUGA  
>N2676  
CCAAGUUGGAAUCCUGAGGAACUUGUUUCU AACACCAGCAA  
>N2677  
GCACCAGUUGCCUUCUGUGAACUCUGGGAAGCCUGGCAAG  
>N2678  
UAUUUGUCUAAGUAAUGGAGACUUUUUCCAUGCAAACCUU  
>N2679  
UAGGUGUCUAACAUAACUGAAACUAUGAAGAAAUCAUGUCUU  
>N2680  
UGACAAUGUUAAACCUAUUGAACUAAAGUUUUGCAUAAUUC  
>N2681  
UUUCUAUAACUCAGGGUAGGACUUUAAGUACCUACUACCUU  
>N2682  
ACUUACAAACUGGGUAAAAGAACUUCACUGAUUUACAUCUA  
>N2683  
AUCUCCAGAAAGUCCAAGAGACUUGGGAUGUGAGAGGCUAC  
>N2684  
UUUUAAUUUUUAUGGUUAUGAACUAUUGCUAUCUCAACUACC  
>N2685  
UAAAAGAAAAAUGUUUAAAGACUCUUCCAAUUGAAGUAUUU  
>N2686  
UUCAGUACAGACAUGAAAGAACUUCUACCAUAGUCACGAU  
>N2687  
AGAAAAAAAAAAAAACCCAAACUUAUACAAACAAAAUAGA  
>N2688  
CCUAUUCCAAACA AUGGAAAACUCAGCUAAUGCACUUCUAA  
>N2689  
GGGCCUUAACUCAGACAUAGACUUAUGGUUAGGAUAUGUGU  
>N2690  
AAUUACUUAGGAAAUGGGAAACUGUCUCUGAAUAGUAGAC  
>N2691  
CUUUUAAAUGACAGUGGCAAACUGUACUUAAGCAUUAUAUC  
>N2692  
GUAGAAACAAAAGAAAAGGACUAAGGGAGAAAAUCUGAA  
>N2693  
CUAAGGGAGAAAAUCUGAAACUAGAAAACCUAGGAAAGAA

>N2694  
UUAGUGCAGAGUUCUGUCAGACUUUCAAGAGAGCUAAUU  
>N2695  
GUACAUGGCAGGUUAAGGGGACUUUAGGGAUAGUAUUUGAA  
>N2696  
UACUGCACACGUCUGACUAAACUUUCUCUCCUCUUGGAAAG  
>N2697  
AUAGACUUUUUCCAGUGCAGACUUCCCACACUCAUGCAAUG  
>N2698  
UGUUUAAGGUGUAAGGUAGAACUAUCAGAGUCAUUUUGAUU  
>N2699  
GCUCUGUAUCUAAUAUUUGAACUCCUUGAGUUCUUUAUAUA  
>N2700  
AAAAUGCAUCCCUGCUGUGAACUGUCUUUGUUAACAUGUA  
>N2701  
UCAACCAAGUGGAAACAAGAACUAUUCAAGAAUUAACCAA  
>N2702  
GCAGAACAACUGGCAGGAAAACUGCCCCUGCACGUGUGCAG  
>N2703  
ACUUAACAACUGACACUGGGACUAUCUUUUAACUGGGCUGC  
>N2704  
CUAAAUGUGGUCCUUGUAAGACUUGCCUUGGUCAUCCUGUC  
>N2705  
UAUUCACAUUCUACCUGAAAACUACAAAGUAUCACCAAGAU  
>N2706  
AUGAGGUGACUCUAGCUCAGACUCCUAUCAGUUGGAGAUCU  
>N2707  
AAGAAAAAUUAUACCACCAAACUUCUGAAGACAGGAAUAA  
>N2708  
UAGAUAGAUGAAUUAGAAAAACUAUUAUAUAAAUUUAUGAG  
>N2709  
AUACAGACAAUCCUAAGUAAACUAGGUAGCUUGAAGUUUGA  
>N2710  
CAAUUCUGCACUGUGCCAAAACUUCUGUCUCUCCUAUACA  
>N2711  
UGAGAGGGCUGAGAAAGAGAACUGAGCUGAUGGGGCAUAGU  
>N2712  
UCUCAUUGUCAACACAAUAAACUAUUUGUGCAGACAAAAAA  
>N2713  
ACAUGCAAGUCUUUCUUUGAACUCCAUCAGUAUACCAUGAA  
>N2714  
GUAGCUGAGUUUAGGCUUGAACUUUAGAUCACAUGCCACA  
>N2715  
AGUCUGUUGGUCUUUACCAAACUAUAUUUCUGUGACACAAA  
>N2716  
AAAUAACAUCUCUCUAAAAACUUGAUUUUAUUAUUUUUA  
>N2717  
GUUUUAUUACACCAAGGAAAACUAAACAGCUAUUAAAAUA

>N2718  
GUACAUUUACACAAUGGAGAACUACUUAGCUAUUAAAAAGA  
>N2719  
ACUAUGCUGGGAACAUAGGAAACUCACAGAGACUGAACACC  
>N2720  
ACAUCAAAAUGAGUGAGCAAACUUGUUUCAAGGGAGUAAGG  
>N2721  
UCCAAGAUAAAAUUCACAGAACUCACUAAGGUUAACAAGUC  
>N2722  
CACAAACAGUGGGGAGAGUGAACUUGCAGAGUCAACCUCAG  
>N2723  
GAAGAACUAUGGGAGAGCAGACUGGGAUGGGGUUUCGACUG  
>N2724  
GUAAAGAACUUGACUAAGAAACUAGUUAGGAAAGGCAGAGG  
>N2725  
AGAAUUGUAGAAACGGUAAGACUUUUACAUGAAACAGGUUU  
>N2726  
CCCCAAACUAAAUAGGUAAACUACAUCAAAGAAGACAGAG  
>N2727  
UGAGUGUAAAAUUAACCCAAACUCAUGGGACAUAUAUGAAGA  
>N2728  
UCCUCUCAGUGGUGGUUGAACUUUGUGAUAUGAUAUGCAG  
>N2729  
AAUGACAAAUAACUGGCCAAACUUGAGACCCAUUCUUUGA  
>N2730  
UUAAAAGUGAGAAUUUAUGGACUAAGAGACUCUGGGCAUCC  
>N2731  
UACAAAAGAAAAAUAAAAAACUUUUUCUCAGAAGCCUUUG  
>N2732  
UGUACCCAAACAAUUGCUAGACUAAGAACCUAUGGUUAAAG  
>N2733  
AAUAAAGUCCUAAAUUAAAAACUCAGUAACCUGGAGCAUGU  
>N2734  
UCUGGGUCUUUAGACAAUAAACUAACAACAUUAUUUUCUA  
>N2735  
UAAAAGCAGCAAUGAGAAGACUGGCUCUCAAUUCCAGUGGU  
>N2736  
AAGAAAUGCAAACUGGGGACUCCUGGAGAUUCAAAGAA  
>N2737  
ACAUUACCUCAGAGUAAAAACUCGGACAAAGCUUCCAAG  
>N2738  
AUCAGUAAUCUGUGCCUCAGACUUUACAUCAUAGAGUCAGA  
>N2739  
UUUUGAAGUUACAGGAAUAGACUAUACCACCUAUGUUUUUU  
>N2740  
CUGUCUUUCCACUUCUAAAACUCUAAAUUGGUUACUAUUU  
>N2741  
UUUAGUUGUUGCACCCAGAGACUGAGUUACCAUUGUUUCUG

>N2742  
AGAACAAAAGCAAUUAUGAAACUGGAACUAAGACAAUGCUU  
>N2743  
UAACUGAGAAGUUAUUUCAACUGAUAACUGUGGGGAGCGG  
>N2744  
CGCUCAGGCUGGUAAUUCAGACUGGGAUAGCAACAUGCUUU  
>N2745  
GGAGCUGCACAGCACUCAGAACUGUGCAUACUGGUUUGUGA  
>N2746  
AUCAGAUCCUUCUACAAAAGACUAUACUCAACAAAACUGGA  
>N2747  
GCAGGGGAUGGUUAUAGGGGACUGUCAAGGCAAGUCUUAUA  
>N2748  
CAAAGAACUGAAGAAACUAGACUCAAAAACCAAUAACCCU  
>N2749  
UCAUUUAAGUUGAUAAAUGAACUUUUUCAAGGUUAUAAUAA  
>N2750  
AAUCUAUCUAUAGGAUAGGAACUUAUCUGUGGGAUGAGAUG  
>N2751  
AAGAAGUAAUUGGACAAAGGACUUGGACCAUGAAGCUGUUU  
>N2752  
AUUGGAAGUCACCUUAUAAAACUCUCCCAUGGUUAUCUUGU  
>N2753  
AAAACCUUAAAAUCAUGGAAACUGCAUAGACAUUUAAGAUC  
>N2754  
AUUUCACUUACAUGGUUAAAACUACACCAAGAUGC UUUAUG  
>N2755  
ACCAAACAGAAUAAAAGAAAACUGGUUAUUAGGUUUUAAAA  
>N2756  
AACAGUAAAUAAAAUAAAACUAUUCUUUUUUUCUGACAU  
>N2757  
GCAUGCAUUAUUUUCAUGGACUAAUGCUAUCUGGUUUUAUA  
>N2758  
AGCAAGUCUGUCUUCAGGGGACUCAGCCUCUCUUUCUGACU  
>N2759  
AAUUUACUUAGUUGCUAUGAACUUUUUCAUAACUUAAGAUAA  
>N2760  
AUUUUCAAAACCUAUACCAAAACUUAUUGAAUUAACAUCCCC  
>N2761  
UAUUUAUUUUAAUUUUAGAAACUAAAGGUAAAAAUUGGUAA  
>N2762  
UAACCAAAGAGUAUACAUGGACUCUCCAAGGUCCCUGGAA  
>N2763  
GUUGUAGGGCAAAGCAGAAGACUCAUUUGUUAAAUGAGGCA  
>N2764  
UGCAUGCCAACCAAUGUCAGACUUAACUUAAGGCCCAGAAC  
>N2765  
ACUGAGCAAAGCUAACAUGAACUCACAGAGUCAGGGACAGC



>N2766  
AGCUUACCCAAGAGGGGUAGACUGCAAGAAAUAUCAAUU  
>N2767  
AUGAAUGGAACUAGGAAAAACUCAACCUGAGGCAACUCAG  
>N2768  
AAUAUAAUACUACAGUAGACUGGGGAAGGCAAGGAUGGG  
>N2769  
UUUAGCAGCGGGGAAUUAAGACUCAAUUACUUUUUUUUUU  
>N2770  
UAGUGUAGCAAAAGUCAGAGACUUCAAAUUGGGUAAUUAU  
>N2771  
UAUUAAGUUAUUUAAGAGGACUUAUUUAUGGUUUCAUAAU  
>N2772  
AAUAUUAGUAUUUAAGGAAAACUACUGAUCCAUGUAUUA  
>N2773  
AAGUGACUGUAAUUUAAGAACUCUGUACAUAUGGAAAAUU  
>N2774  
CACUAUAUAAGUAUCAGAGGACUGCCUCAUCAGGAAUCAU  
>N2775  
AGAAUUUGGUAUUGUUGGAAACUUUUGCUAUAGCUGUGUUA  
>N2776  
GAGAGACCAAACUGUGGGAAACUAAGCCCUGCAGUUACUCU  
>N2777  
UUUUUUUGGAAAUAAGCUAAACUGCUCAGCAAUUAGGUGA  
>N2778  
UUACAAAGUGUCAUAUCUGAACUAAGUUUGUGUUAUUUU  
>N2779  
UUUAUAGAAUUUGUUGGGAAACUGAAACUCUAUAUUUAAA  
>N2780  
ACAAAACAAAACAAAACAAAACUCCUAUAUAGAAUUUGGAG  
>N2781  
UUUACUAACUGCCUACUUGAACUUGGCUGCUCAUGUGCAUU  
>N2782  
UGC UUUCUAACUCUGUGAAGACUUGGAUUGGAAUAUCGACA  
>N2783  
GGUAGGGAGAAAGUGGGCAGACUUCUCUAGUCCUGAUUUC  
>N2784  
UUUCUCUGUAUAGCCCUGGAACUCACUCUGUAGACCAGGUU  
>N2785  
AAUCCUACAUCUGAUAGAGGACUAGUAUCCAUAUAUACAA  
>N2786  
GGAGGAAAGGUCAUCCAGAGACUGUCCCAUCUGAAGAUGCA  
>N2787  
CUAGAGAAAGGAACCAAGGAACUGAAGGGUUUUGCAGCCCC  
>N2788  
AAUUGAAAAGUCAUAUGAACUACCACCUUUGGCUGAAC  
>N2789  
AUAUGACCAGCUCAGUCCAGACUUAAGCAGAAUUAACUAU

>N2790  
CCCUCUUUAUACUUGGCAAAACUUUAUCAGGAGAAACAAA  
>N2791  
UUAACAAGCAAUUCAUCUAAACUGUCAGUUAAAUGAUUAAA  
>N2792  
UUCUCCUGUCUUUAUACUGGACUCCUAUAACCGUCCAUC  
>N2793  
GUAGAUGAGGCUAGCCUCAAACUCAGAAUCCGCCUACCUC  
>N2794  
GUUAUGGGUUUUUAACCAAACUUCAAAAGAGACACAAAUA  
>N2795  
UUGUCCCGCAGUCAUGUGGAACUGAGUUUAGUGGUGUCAGC  
>N2796  
AUGUAUGUUAGAUGCACAGACUCAUACACCCACAAGAAGA  
>N2797  
CAUGAAGGAGAUUGAAUAAACUCACCAAAAAUUCAGGUGC  
>N2798  
UCUGUGAACUCAUUCUGUAGACUAGAUUGUCCUCUAACUUA  
>N2799  
UGACUUUGUUAAUAAGCAGAACUGUAAUCAGUAAUUAUCA  
>N2800  
AAAAAAUUAUUAAGGUGAACUAAUAUGAAGUUAUCACA  
>N2801  
AAUUUAUUCAAAUAUUGAAACUAUUACUCAAUAUCAUGA  
>N2802  
UGUCAGCUUCUGUGGUGCAGACUCUCACCUGUGCAGACUAA  
>N2803  
GAAGUGCAAUCAAACAAAACUGAGAUUCCACUUUACACC  
>N2804  
UAAGGUCCUAGCACUAACAGACUCUCUUCUAUAUCCGUGAC  
>N2805  
AUAGAUCAGAGUGUUCUAGAACUCAACAUCUACUUGC UUUG  
>N2806  
AGGUGAACAGCACUUAUUGACUCUCAAAGAACAGUGUUUUUU  
>N2807  
UGUGGGCCAUGUGCAGACGAACUGGCACUCCUAGGUCUCUUC  
>N2808  
GGAGUCAGCCCAGACCAGGGACUUCACAAAGUCCUUCAGUG  
>N2809  
AUGAUCUCCACAUGAACAAACUCACAGUCUACAUA AAAACU  
>N2810  
CUGAAUAUGUGUAGUAUUAAACUAAUUCUGAGUGAUUUUAUC  
>N2811  
AUAUCCCUAAAGAAAUAAAACUGUCAUUAUAUCAUCUCCA  
>N2812  
CAUUGCCACUAAAAGCAAGGACUAGGCAAUGCUGCCACUC  
>N2813  
AAGCCUACUUAAUUGCUGAACUUUAAUAAAAUAAUAGUG

>N2814  
UAGGUCUGAUAGAACUCUGAAACUAAAACCACCUGGCCUGG  
>N2815  
UUUCCCAUCUAGGCAGUAAACUCGUGACUUGGUACCGCUC  
>N2816  
UCAUUCUCAAGCAAAGAAAAACUUUAUAUGGAAUUUAAUGA  
>N2817  
AUGUGCCUUUGAAAAUUCAGACUCUAGUUUGAUACCGCUCU  
>N2818  
AUUGGGGGACCCACAUGAAAACUGAGCUGCACAUCUGCUAU  
>N2819  
UCUCAUAGAUGUUUGCAUAGACUACAAUUGCAAUUACCUC  
>N2820  
GAAAGGGGAUAACAUUUGAAACUUAAAUAACUAUCUAAUA  
>N2821  
AACAUAAUAGCUAUCAAAACUAUCCUAUAUAAAAGAAUG  
>N2822  
AACUUCAGUGAAGCCCAUGAACUUAGCUAAAUUCCACAAU  
>N2823  
UUUCCUUAAUAUAUAAAAGAACUCCAAUAGAGAGCACACAA  
>N2824  
UUUACCUCUGACUUGCAAGGACUCAGUACCUCUGUGCAUCA  
>N2825  
UUUGUGUAAGAAUAUCUAGGACUUGCUGUAGUGAGGUAGCU  
>N2826  
GCAAUAAUAAAUAUUGAAACUUUUAAUUCCAAUUACUUU  
>N2827  
CCAAUCCACCUUGGGUACAAACUCUGCAGCCAGUCCCACAG  
>N2828  
ACAUCAAACUGAAUAGAGAAACUUGAAGCAAUCCACUAAA  
>N2829  
UGGAGUUCAGCUUCUUGAGAACUUUGUAUAUAUUGGAUAAU  
>N2830  
GGGAUUCUGUGUGUUUGAACUUUAGUAAAAAUUAAUUUA  
>N2831  
GAUCAUUUUUGUAAAUAUAGACUUUUUGGAUAUAUGUAAAGA  
>N2832  
GAUAAAGGGUUGAAAUGCAGACUAUGUAAAAAAUUGCAAAG  
>N2833  
UUCGUAGGAUAAUGAUUCAACUAGGUAUCACUGUGUUAAA  
>N2834  
CCUCCAAGGAACCCUUCUAAACUUCUCUCCCAUCUUCUCUC  
>N2835  
GAUCCAUCCUUAGAAAAAGAACUACAGGCAGCUAACAAUUG  
>N2836  
GUUCUCUCCUGUGGAUCAGGACUAAAUCAAUCAGAAGCCU  
>N2837  
AACAUUAAGCAGAUGUGAGACUGGAUAAGCUAAGAAUUCU

>N2838  
AUGCUUUUGCAUUACAAAAGACUUUUUGAUAGGAAUGCCUUU  
>N2839  
AGCUGGGAGGCAAGCCGGAAACUAGGCGGUGGAGAGAAAA  
>N2840  
AUGGACAAGGAGGACUUCGAACUGCUUUUGUGGAUCAAUCG  
>N2841  
AAGGUCACCUUUUCAUUAGAACUUUACCUUUUCAUUAGCUU  
>N2842  
CCAAAAGAAGAAGAUUGUAAACUGUGAUUUGUAAAUUUAUC  
>N2843  
GUGUAUAACUCAAUGAUAAAACUACUAUGUAGUGUGUAUUA  
>N2844  
UCAACUUGAGCCUUGGCUAAACUUUGUCCACCUUUUGCAA  
>N2845  
CAUACAGUAUCACUGUAGGGACUCAACCUGAGUUAUGGUAA  
>N2846  
GUGAAUUAUCAGAAGUAGGAACUGAUCAGGCGGUUGCCGC  
>N2847  
AACAUUAUUGAGGAAAGGGGACUGCCCAGCGGAGAGCGCU  
>N2848  
ACUGUCAAUAAAGACAAAAGACUACCAACAGAUUGGGAAAG  
>N2849  
UGCCUUUGCCCCUAUUUAAAACUUACUACAGAGGAGUUGAA  
>N2850  
CCAACCCACCCACUCCUGGACUCUUCCUAUUUUUACACCU  
>N2851  
UAGGAAAAAAUUGUGAAAGAACUCAGAAGAUCUCCAUGC  
>N2852  
CUUGACAAUAAUUUACCUAAACUACAGACAGACUCACAAAA  
>N2853  
GAGCAUCAAGAAUCCAUAAGACUAAGUGCCUCCUCACCCAC  
>N2854  
UUGAGAACUCAAGGGAGGGACUUUAGAUGAAAUGUCAAAU  
>N2855  
AACUGGAACUCUGCCCUGAGACUGUGCCACUUCGAAAGGCA  
>N2856  
AUUGUUUUUUGUCUUGUGGAACUGCAAUUUAAAAUCCAAG  
>N2857  
AUUGUUGUUUUAAUUUGUAAACUUCAUGCUUGGACUCCUCA  
>N2858  
CAGACAUC AUGACAAAGGGAACUCUUAUAAAGACAAUGUUU  
>N2859  
GAAUCCUGAU AUCACCAAGACUUUAAUAUGUAGGGGU AU  
>N2860  
GUGCUGCUUGUUGUGUGUGAACUAUUCCAAACUGAACUGA  
>N2861  
UCCACUCAGCAUCUGGUGAACUCCAACACAGAAGUGACAU

>N2862  
UCAGAAAUAAACACACCUGGACUAAUUGUAAAUGUUUUUAU  
>N2863  
UCACAAAUUUUAUCAACAGAAACUCUCCAUAUACUGGAGGAUC  
>N2864  
UGUGCCUCCAUAUCAAAGAGACUACACAAAGGUUCCUAGA  
>N2865  
AGAAAUGUUAAAUUUAAAAACUUCUGACAAAAGUCCAC  
>N2866  
UCUCAAGUGUGGCUUGGCAAACUAGAGAAGUAGUCA AUGAC  
>N2867  
CAAGUGGAUCCAUAACACUAGACUAAGGAAGGUUAUAGGGUGU  
>N2868  
UGAGAAAGGCACAGCUGAGAACUUCUCCUGGCAUUCUUGUG  
>N2869  
AAGGAGUGAAAGAGACAAAGACUGCAGCUGAGACGAAAGGA  
>N2870  
AUGAGUGAGUUCAACACCAAACUCGUUUUUUAAAUUUUUAU  
>N2871  
AGCCAGGGCUAUACAGAGAAACUCUGUCUAAAAAAAAAAAA  
>N2872  
CCCUGAGAAAACUGUCAGAGACUGAGCCAGCAACCAAAGAG  
>N2873  
GUUCCAUUUCAUGUUGUGGGACUUAACUCUACUCAGACAUU  
>N2874  
ACAAGAGAUGGACAGUUCAGACUCUGUCUCCCUCAUUUUUU  
>N2875  
GUGCUGGAGAAACAACAUAGGACUAAGUAUGCAGUCUUCAU  
>N2876  
UUAAUUUUUAUUUAAGUAAGACUGAUUUUAUAAAUAUCAUUG  
>N2877  
GAGGAGUAGAAGGAAGAGAAACUAUAUGUGGGAUGUAUGAU  
>N2878  
AGACAGGCCACUAACAGCAAACUGUCACACACCAUAGUCUC  
>N2879  
UAUUGACCGAGGUAAGGAAAACUAAUGUUAACCAUGCUUAA  
>N2880  
CCCAUUUCACAGUUCGAAAACUGUUAGUGGAUGUGUGGGU  
>N2881  
AGCACAGUAUGAGGCACUGGACUGUCUGCUUCAAAUAUGAG  
>N2882  
GCAAGACCAUUGACUUCUAAAACUGAUUAUUAUUGCUAAAA  
>N2883  
UGAACUCUAUUUCAUGGAGACUUGAAUUUGGUAGCUGAAU  
>N2884  
AAGAAUAGAAUUUAUCAAAAACUCUAGGAUUUAUUCCUAUU  
>N2885  
UCAGUAUGUUAGCUUGCAAAAACUCAGACUAGGAAGGAAAAA

>N2886  
GGUUUGUGUUGCCCAUACAGACUGAAAUUCAUAAAUCCUGU  
>N2887  
CAUUUCAAAAAACCACAAAGACUGCUGAGAAAGGAGUCUAU  
>N2888  
GUAGUUGAAGAAUCAAUCAAACUGGAUGAGGAAUGCAUUA  
>N2889  
GCAUAUCAAGUUACAGUAAAACUAAGCAUAUCUCCUCAUUA  
>N2890  
GUUAAUUUGGAAAAAAGUGAACUAAAACACCUGUUAGGAAU  
>N2891  
GAUAGGGUUUCUUUGUGUAGACUUGCCUAUAGUGGAACUAG  
>N2892  
GUUUAAGUGGAAUAGCUAAAACUCCGUUUAAAUAACCUGCA  
>N2893  
AACUCUAAGAACAAAUCAGAACUAAACAAAACAAGCAGAGA  
>N2894  
AAAAGACAAUGGGUAUUCAAACUUAUUUCAGAGUACUUUAA  
>N2895  
AUGCUUCUCUCCAUAUAAGAACUUAUUAAUAAUGUAUCCCU  
>N2896  
UGACACCCCUCCCAUUUGAACUAUUAAAUUCUUAUACAA  
>N2897  
AAAAAAGAAAAAAAAAAAAACUAUGAAGACACAGUUGAAA  
>N2898  
UGACACAAACUGGAUAAGAAACUGUCACUGAUGAUGUGUGA  
>N2899  
CCCAGACACACACCUGAGAACUCUGUUUAUGGCAAGCUAA  
>N2900  
CUCUGUUUAUGGCAAGCUAAACUCAAACUAUAGACUUUGAG  
>N2901  
GCUUUCACAAUUUUUCUGAACUUCUCUGCUAAAUAUACC  
>N2902  
CGCCGAGUUAACAGGUAUGAACUAUUUCAAUCCUUAGUUU  
>N2903  
UUUCAGAGACACAGUUUUAAACUAUCUGAAGGGAUUUAUGCU  
>N2904  
UCAAGUCAAAACUAUGAUAAACUUUACCUUAUAGUGAUCAU  
>N2905  
AUCUCCAGAGGAAAUCAAAACUCGUAUCAAACUCUGGCU  
>N2906  
CUUUAUUGUUUAUAGAAGAAAACUGAAGACUUAGGGUCUAAA  
>N2907  
AAAAAAGAAGUCUCACUGGACUAAAGUUAUCCCAUUUAUUAU  
>N2908  
GAAUUGUGCAGACUGUAGAAACUCCAUAAGGCAACCGGUGUU  
>N2909  
GUGUGCACCUGUCACUUUAAACUGAGGUUUCUCAGUUUAAA

>N2910  
GGCAAACAAGACCAGUAAGAACUCGAGGGGCACUGAUAAAUU  
>N2911  
AGGAACUGUUAGCUAAACAAACUCCUUCUUUCCCAACUUGC  
>N2912  
UAUCUAAUAAAAAAAAAAGAGACUGAACUUUUACUGUGAGUU  
>N2913  
CAGGCACUAUUAGAUUGGAGACUCCAGCAGGGACAAUUAUAG  
>N2914  
GUCACCUUUUAAUUGGGUGAACUCUAAUCUGCUAGCAAUGC  
>N2915  
AUACGUUGUAAUUUUUAAAAACUGGCACUUGAACACAAAUA  
>N2916  
GCUUGGACCAAUACAGGAGACUAGAUAGGUACCUAGGUUA  
>N2917  
UAAGAAUUGCCCAGAACAGAACUCUGUGUGUAUGUGUGUAU  
>N2918  
UAGCCAUUUUGAGUCUAUGGACUGUAGCAUGAAUAUUCUUU  
>N2919  
AACCCCAAGGUCCCUAGAGGACUCUCCAUGUGAUCCUAGGA  
>N2920  
AAACAACAACAACAUAUAAAAACUGUAUAGCACUGGGUGAUG  
>N2921  
GAAAGAUGAAGCUAGCUUAGACUCACAAUCAGCAAGAAUCU  
>N2922  
UGCCUCACAGGAUCUCACAAACUAUUCAGUUUCAGUGAUAU  
>N2923  
ACAGUAGUGAUCAAUGUGAAACUAGGUGAUUUAAAGGUAGC  
>N2924  
GGCAUUUUGAGUGAUGCUAGAACUAGGAAUCUGAGGUAAGAU  
>N2925  
CAUAGUAUAGUGUAAGACAAACUUUCCUAUCGUCAAUACAG  
>N2926  
CUCUCUCAACAUGAGCUAGAACUAAAAUUAACAUAGAAAU  
>N2927  
AUACAAAUAUAAUCCCAGAACUUGGGAGGCAGAGGCAGGC  
>N2928  
UAUAAAUAUCUACAGUAAAAACUAGUGUAGAGGAAAGAAAC  
>N2929  
UCAUUGAGAAGGAGUAGAAAACUUAGAUUAACCCACAGC  
>N2930  
UGAGUAGCCAAAUGUAGAAAACUUCAGCUGGAUCAAUACCU  
>N2931  
GGGAAACACAGAUCUGCAGGACUCCUUGACAAGUCAAUUA  
>N2932  
CUUCAAUUCUAUCCAUUGGACUACUUGUCUGUCUCUAUAC  
>N2933  
CAAUCAUAAGAGGCAGAAAAACUUUAACAAAAUCAACUUC

>N2934  
GAGAUUUAAAGUGUGUCAGGACUCUUGCAAGACCAGUUCUC  
>N2935  
UCUAUCUCAUGACAAUACAAACUUAUUUAAAAGGAUAGCCA  
>N2936  
CACUGAUGGAAUAUGUUAAAACUUUCUGUUUAUGGUAAAUU  
>N2937  
CUGGCACAUAGAAAGCAGAAACUUAUUGCUUGUAAUAUAGU  
>N2938  
GAAGUGUGGUUAAGAUAUAAACUUAUAGAACCUUACUUGCAA  
>N2939  
UUUCUAGUUGGUUUCAGGGAACUUCUUUUUCUAUGCCUUA  
>N2940  
AAUAAUAAAAGAACACUCAGACUUUCCCCACCACACACAAA  
>N2941  
UUGUGAUAAGGUAAUUAUCAAACUGUUGAAUUUCUAGUAAUG  
>N2942  
UUCAUAGAUUCCUUGGAGAAACUGUACUACAGCAGCAAAGA  
>N2943  
CAACAAAUGGUGUUGGUCAAACUGGAUGGCUGCAUGUAGAA  
>N2944  
CAUAAGUUGGGCCGGGAAACUACUAAUGACAUCUACUGG  
>N2945  
CCAACAUCACAAGAAUUUAGACUGGAUUGGUCUGAGUAUCC  
>N2946  
UCCCUCUCUCUAGCGUUGAGACUGCAGAUGAACUAUUUGCC  
>N2947  
AAGUACCAGUUAAUUGGAAACUAAAGAUAUACUCUUUUUC  
>N2948  
GCAUAAAUGAACUUGCAGAGACUGGAGCAGCAUGCAUAGGC  
>N2949  
UCUAGUCACAUUCUUAGAGAACUAAGCCAAUCCCAGUGCUU  
>N2950  
UUCUGGUUAAUUUCACUUAGACUAGUAUGUUCUACCAAGAG  
>N2951  
GUGAAUUGUGGUUUUUUGAAACUAUCUUCUAGUAGCUGUCC  
>N2952  
GUGAUUAACAAGAUACCAGAACUAUCAAGUGAAACCUUUG  
>N2953  
GUUGACAAGGGGUCUAUUGGACUGGCUGGGUUUAUGUGUCA  
>N2954  
CAAACUCUUUGUCAGAAAGAACUUGGCCAGGUAGUCACUUG  
>N2955  
CCAAAGGCUGAUUGAUCAGAACUUCAGUUUUGUGAAGCUUU  
>N2956  
UUUACAUGUUGCCUUUUAAAACUCUUCUUUUCUAGUAAA  
>N2957  
CUUGAUUUUAAAAGCCACAGACUUUAUGAGGUACAUAUAUGA



>N2958  
GUAUAUUGUUAAAAGAGGAGAACUUGGAGUGAGACAGGAAGG  
>N2959  
UUCAUAAGGUUGUUUAUAAAGGACUAAAGGUAGCAGCUGGAAA  
>N2960  
CUUUGAAUGGGAAGAGUCAAAACUCUUCUCCUCACCUCUUC  
>N2961  
GCUGGGUUUGGAAAUAAAAGACUAGGCUAUGGAUGAGCCUA  
>N2962  
UCAGACAUUUUUAGAUUUAAACUUUUCUUUGACAGAUGUAU  
>N2963  
UAAAACUACUUUGAUUCAGAAACUGACUGCAGAAAUCAUUCA  
>N2964  
CUGUUUAUAGUCCUAGUGUAGACUCUAAAAUACAUACUCUUA  
>N2965  
CUUGAAUGCUGUCUACCAAAACUUUAGAACAACUAAUCAAU  
>N2966  
AUGGUGCCAUUCUUAUUCAAACUACCAUAGGGUCUUGCCAU  
>N2967  
GUAAAUCUAUGAGUACAUGAACUGGUAUUGUUUAUUAUAAA  
>N2968  
UCAGAAGUCACUACAUUGAAACUCUUUGUAAACUGCAUGUG  
>N2969  
AAAUAUUAUUAAGCACACAAACUUAUACUAUUAUUAAGUAG  
>N2970  
GGUAAGAGUCGAUCUUAAGACUUUAUGCUAAAGUUAAGAU  
>N2971  
GAGUAUGAUGACAUGUUUAGACUUAGGAGAAUACAUUGUAA  
>N2972  
AGCUGAGUAAAAGAUAAUGAACUUAACCAGUAAUAAUAAUA  
>N2973  
AUCCCCAACCUAGACAAAGACUCCCUACUAGAUCAGAAGU  
>N2974  
AAAACAAGUAGUGGGCCAAAACUUCAUGCUUGAAUUAUACA  
>N2975  
UGUACUUUAUUCACCUGUAAACUGGGUCCAAGUGACAUCAU  
>N2976  
AUUAAUGGGUAAAGGUUAAAACUUUGCACAGUGUUCUAUGA  
>N2977  
CAUUAACAUGUAGAUUAUAAACUGGGAAUAUGACUAAAAU  
>N2978  
CAGACAUCUUCUGGUUAAGAACUUGUCUUAUGAGGAAGAAG  
>N2979  
AUGGUCAUGUGCAAUGAAGAACUAAUUUCUUUUUCUUAAC  
>N2980  
AAGUAAAGUAUGAAACAAGGACUUACUGUGUAAACUUUGAA  
>N2981  
UAGAGAAUCUACCAACAAAAACUGCUAAAGGAUAUUCUGUA

>N2982  
CUUGGAAACACCUGCUAAAAGACUAAUUAUGUGCUGGUCAUU  
>N2983  
GCUUAGCAACAGCUUGACAAAACUCUGCAUCACACGGCCUCA  
>N2984  
CCAAGAUUACAUCCAAUAGAACUGAUUCUAAAUAUGACCU  
>N2985  
GUUUGACACGCUAUCUUGAAACUUGCACCUCUUCCAUCU  
>N2986  
UCUUUGAGACCAGCCUUAGAACUCAGUAUUCAUUCCAAUAC  
>N2987  
UGGCACAUAAGGGAUAAAAACUUCAAUAACUCACUUUGGA  
>N2988  
CAAUACAAGACUAUAGAAAAACUUCUGGCAACAUAACUU  
>N2989  
AUCAGCUUUCUUCUCUGUGAACUGGAAGGAAGAAUUAACC  
>N2990  
GUACAUUUCUUCAGCCUGAAACUGAGAACACAGAGAGCUCC  
>N2991  
UUAUAGAUCUAAAGCAGAAAACUCAGGAGAAAAGAAAAGAA  
>N2992  
UUCACACAAAAAUACCCAAACUGCACUAGGGAUGUAGCUU  
>N2993  
CAGGACCUUUUAUUAUUGUGGACUGGAGGAGGGCUCCAUAU  
>N2994  
UAAUGCUGUUUCACCAAUGAACUUAUUUAGUACUUAUACUG  
>N2995  
CAAAAAGUUCUACCAAAGAACUUCUCCAGCUGAUAAACAA  
>N2996  
CAAUAAAUGUUGCUGGUCAAACUGGCUAUUUGUAUGUAGAG  
>N2997  
GGAGGGGGAUUGGAUCAGGGACUCUGUGAGAUGGGGAAAGG  
>N2998  
GGGAUCUCAUAAUUAUAAUAAACUGAAAGCUAGGAAAUUAU  
>N2999  
GAAUUACACUAAGAAAACAAACUCAGAAUAAAUAGUAAUAA  
>N3000  
CUUUUCUUAUUUUCUGCAAACUAAUUUGUGUUCUUUGCCA  
>N3001  
UUAAAUAUCUAAAAUUAAAAACUAAGUUCUUAUCACUCAGU  
>N3002  
UUGGGGGUGUGCAUUAGUGAACUUGAUGUCAGCAGGUCAGA  
>N3003  
AUAAAACCUGCUCCUUUGAACUCCUCUGCCUGCACUGAA  
>N3004  
UUAGUCUCCAUCUGGGUGAAACUAUGAUUGAACCUUGGAUA  
>N3005  
UACAUAGAACUACAUAGAACUACAUAGAACUACAUAG

>N3006  
CUACAUAAGAACUACAUAAGACUCCUUGGUGGGGCUGGAG  
>N3007  
UUAGUGUAUGAUUAUUCAAACUAUAAUUAUCCAAUAAAUA  
>N3008  
UUAACUCAUCUGAUGCCAAAACUCAGGAAUAACUAAAAGA  
>N3009  
UGCUCCAAACACGCUGCUGAACUAAUUCUCCUAUGGUAUGU  
>N3010  
AAUUCCCUGAUUAUCAUGAACUUUUAAGGACUUCUUUCA  
>N3011  
UGAAUACAACAGACACACAGACUAUAUAUAGGACUCUAGAC  
>N3012  
UAUAAAAACAAACAUUUCAAACUAAAUCUUGACACAGUAAA  
>N3013  
AUUUUAUCAUGAUGGUUGGAACUCACUCAGUUAUGUGAAUC  
>N3014  
AAGAUGAGGGAACAAAGAAGACUGCAAAGUAGAAUUUUCUU  
>N3015  
GAAUAAGCCAGAGGAUGAGAACUAGCUAGAUAAUUAGAAUA  
>N3016  
AUUACCAAAGUGACUGUGAGACUAGACAAAGCAAUUCAUUG  
>N3017  
AUAGAAAAACAGAGACAUGAACUGAGAUUUCAGAUGUAUUC  
>N3018  
UUGAUUAGAAGAGACUAAAGACUCCCCGAACAGUAUAGGCU  
>N3019  
AAACAUGUAUACAUAUGUAAACUUACUUCUAUAAAAGCUAU  
>N3020  
AAUUGUCUCAAUUGGUGUGAACUCAAGGGCAUGCAAGACAU  
>N3021  
ACACACACUAACUCAUCAAGACUGGUUAGUGCUUUACCUCA  
>N3022  
UUCAUUAUAAAUCUCAGAGACUGAAAACAUUCUAGGCCCA  
>N3023  
AAUGUAUGAGCAACACAGAAACUCCAAGCCUACAUAAAAG  
>N3024  
CCAUGAUGUGUACUUUCUGGACUUUAUGAUGGUGCAAAGA  
>N3025  
AUGUGGUAGAAAGGCAGGAGACUGUAGAAUAUUGCCUAC  
>N3026  
ACCUUAAAUAUAGAAGUGGACUUCCCAGCUCCAUUGAGUU  
>N3027  
GGUGAGUGCUCACUGGAAGACUAUAAAACAGCAGAGGCUG  
>N3028  
CUUUUGUGGUUCCAUAUCAAAACUUAAGGCUUUUUUUUUUC  
>N3029  
CGGGUGAAUAAGGAUGUCGAACUUUUUUUUUUAUGUUUCU

>N3030  
UACACACUUGAAUUGGGGAAACUCCCAGCAGCUGGAGUAGA  
>N3031  
CUCCCAGCAGCUGGAGUAGAACUUCGGUAAAGGAAGCCUUU  
>N3032  
CCUAAAGAAGACUAUUUUAAACUGAACCUAUACAUAUACCU  
>N3033  
UUUAGCAAACAGUGAUAGAACUGGAAAAAAAAUUGAAAGGU  
>N3034  
GAGUCCUGUCAAUUUAAGAACUUAUAACUUAGGAAUUUA  
>N3035  
AGCACUUUGAACUUUGCUGGACUUAACCAUAGUGUCACAAA  
>N3036  
CACUGCUGGUGAGAGUGCAAACUUGUACAGCUACUUUGGAA  
>N3037  
AAAGUGUUUUAAUAAGAAAACUCAAAUUUCAGCACAAGCU  
>N3038  
GGUUGAGCAGGGGGUUAAGGACUGGAAUACCGCUGAGAGUA  
>N3039  
AACAUUUUUGGCUUUAUGAACUAAAACUUACAUAUACUA  
>N3040  
AAUAAAAUAAAAUUUCUCAGACUGUGAUGAGGAUUAAAUA  
>N3041  
CAGAGGACUACCGGAUAUGGACUCAGUCAGAGAAGAUGCAC  
>N3042  
AUAUGGGUUCAGAGCUCAAACUUCCAUGACGAGUUUAUUG  
>N3043  
GGGAAAACUUCAGAACAGACUCAAAUCCAGACCAACAUC  
>N3044  
GGCUUGCAGCAAACCAUUGGACUGAGCACAAAGUCCUCAU  
>N3045  
AAUAUAACUAUUGACUAAAACUUACGCUAGAUGUAUUUA  
>N3046  
AUGCUGUAUUAGCAUUAGAGACUGCCAGAAUUAAGCAG  
>N3047  
UGGCACAAUGCUGGAAUGGAACUAAUUUCUUAGCCUUAGUG  
>N3048  
UCACUAUCAAACACUUGUGAACUGCAACAAGCACUUUUGAU  
>N3049  
UCAUGUCUUUUAAUAAUAGAACUCCUGAGUCUAGCUCCACA  
>N3050  
AGAAACUGUAGGGGAAAAGACUAAUUCAGAAGGAAAUGUA  
>N3051  
CCUGGUACUGUGGAAGCUAGACUGCAGCAAAAAAAGGUUUC  
>N3052  
GGGAAUGGAGGGGAAGGGGACUGGAAGGAAAGGGAUGGAA  
>N3053  
GUUUGGUGAAGCAGCCCCAAACUCUCAUUAAGAGAGUAUUU

>N3054  
AGAGAGAGAGAGAAUGAAACUGUACAAAAAGGAAAAGU  
>N3055  
CAUCCAUC AUGACCAAGUAGACUUCAUCCCAGGGAUGCAAG  
>N3056  
CUGGGGCGGGGACCUCCAAAACUCUCCAAUCUAAAUGGACA  
>N3057  
UAAAUUAUCUAAAUGGGAAACUCAGAUAGAAACUCUCCC  
>N3058  
UUCUUUUUCACCUACCAAGAACUACUGAUAGCAGCUUUGAC  
>N3059  
AAAGGGGCAACAGAGCAAGAACUUAUAUUUGAAAAAUAAA  
>N3060  
UCUAACAAAAUAAACUUCAAAACUGAAACUAAUAGAAGGGGA  
>N3061  
AGAGAGAAACACACCAAAGAACUUAUGGUACUGUCCAGCU  
>N3062  
UAUGUGCACUAUCCCUAUGAACUGUGUUUAUGAAAAAAU  
>N3063  
ACUUCAAUUUAUCAAAAAAGACUUGAUGGAGCUUAUUUAUA  
>N3064  
GUUUUACUUUAGUUGCUIAAAACUUUCCAAGAUUGAAUCUU  
>N3065  
AGUUCUAACUCAUUGCAGAAACUGCAGUGCACACAUACACA  
>N3066  
AUUAACUCAGGAAUACCAGAACUAGUGUGUCUAGCCAUGG  
>N3067  
ACUCAGAUUGUAGAACGUGAACUUAUUGUUAAAAUUAUAGA  
>N3068  
ACCCACCUUAUAUGUACUAGACUAAGGACCUUUUAGAGAUG  
>N3069  
AAAGCAUCACUUGGAGAAGAACUAGUUCUGGAUGUAAAGGA  
>N3070  
AAAAAGAAUCAUCUUCUAGACUCCCUACAGCUGCCUUCAU  
>N3071  
CCAUCCAUCUGGAAUGUAGACUGCCCUGAUUUUAUGUUGU  
>N3072  
CUUGGAUUUGGUUAGCAAGAACUUUAUUGAGGAUUUUUGCA  
>N3073  
UGGGACACAAGCACCCAGGAACUCAGCCCAAUCAUGACAU  
>N3074  
AUUACCCUAAAAAGACAUAGACUAAGAGACUGGAUUAUUAA  
>N3075  
ACAUCAUGCAGGAAUGACAAACUGUAGGUCUGAUUAUAUAU  
>N3076  
AAUACAUGCUGUGCGACUAGACUGGCCAGAUACUGCUAC  
>N3077  
UGUCUAUGCAUAGUGAUUAAACUUAUUUCUUAUUAAAAUAU

>N3078  
CAGGAAGCAACCUUACUUAACUCUAUUUUGGGUCACCUCUA  
>N3079  
CAGACAAGAGAGUAAAAAGGACUUGAUAAGAUUAAAAUACA  
>N3080  
UAUACCCGAGGUGAUGCUAACUGUGUAAGUAACUAAUACU  
>N3081  
GAUAUGCUUGCAGAUGGGAGACUGGAUGGAUGACCUCUGAG  
>N3082  
AUAACUUGAAGGCUCUAAGACUGUGGACUUGGCUUGACUA  
>N3083  
CUCUUGCGCCACCGAUGAGGACUGCACCGGGGUGACUGCCA  
>N3084  
UCUUGCCCCAGGGCAUUUGGACUUCGGUUACUCUCAUGAA  
>N3085  
AAGCGAAAGAACACUGAUAGACUAAAGAAAACCUAAAUAUG  
>N3086  
GCCGGGAUGUGACAUAUUGAACUGUGGCCUAAAAUCAUUU  
>N3087  
AGAGCACUGAUGUGCCAGGAACUGUACUUGGUCGUUUUACA  
>N3088  
UACAACAAACAUUUCAUUGAACUGGAAGCUCAGACUCCCC  
>N3089  
AUAUGCUGCUCUUGUCCAGGACUGACGUUCUGUUCUAGCAC  
>N3090  
AUGUUGGGGGAGAACUGAGAACUCUUGAGUCAGGAGUUGGC  
>N3091  
GAGUCUGGCAAGUUAAUGGACUUACCUCAAAACAAAUAUCU  
>N3092  
UCAUCUGCAGUAACUCAUAAACUGGGUAAGGUGGCUACUCC  
>N3093  
GUGGCGAUGAUGAAACCAAGACUAAUAGAAAUGUAGUUUG  
>N3094  
GUAUUGAGCAGCCAAUCCAAACUCUUCAGUUCGCGCUUGG  
>N3095  
UGAGGAAUGCUUCUCAGGGAACUUUUUAUUUAUGUAUAUGGU  
>N3096  
CCCUUCUACAGUGUGUUGAACUCUCAGAAAGCCUAGGAGA  
>N3097  
UCUGCCAGAUUGCUCUUAACUUGGUCCAGUUUCAUUCAG  
>N3098  
CCACCUGCUCUGCAUAUGGAACUCCUUCUCAGAAACCCUAG  
>N3099  
UAAUUUAUGUGUCUGUAUGAACUGAUUUUAGCAUAAAUGUA  
>N3100  
UGAUUUUAAGGGACCGGAAACUCCACAGCCUCCUAAAAA  
>N3101  
AAUGCAUUUCCCCAGUGCAAACUGUAUGAACUAAAAACAC

>N3102  
ACCUUGAGACUGUUUGUGAAACUACGCUACAGAGGCAAUUU  
>N3103  
GGUCAGGUUCUUACAGUAGAACUCAGUUCUACAAGGUUUG  
>N3104  
UUGCUGGUGUUGGGCUGUGGACUCUGGCUGUCGUGCAGUCU  
>N3105  
ACUUCUGGAAAUCCCAUGAAACUUAACUUCUAGGACUGUC  
>N3106  
AUAAGACACCACUUUAAAAACUAGUAAAGUGUUGGCUCUA  
>N3107  
GGAUUAAGAGUCCUGAGAGACUAGGAUAAGGAAGGGUGGG  
>N3108  
GUACCCAGAUGCUGCUGUGAACUUUGAGAAGUUGGGAACAG  
>N3109  
UCCACACCAUCAGUACUUAACUUCCUAUCCUGUUUGUCUC  
>N3110  
AUUUAAGUCUUUAAUGGGAACUGGUUUC AAGGAAGCUAUA  
>N3111  
UGUCCUAAAUCCUUUAAAGACUACUAUAACGUGGAAGUCU  
>N3112  
CACUGAAGUUUAUCUCUUAACUGGCUAACUAUACACACUA  
>N3113  
AUCCUUAAGUCACUGGAAGACUAUCACUGCAUCAAAGU  
>N3114  
CUAUGUAUCUAAAUAACCAAACUUGCAAAGAAUCCAUUUCU  
>N3115  
CCUGAAGCUCAGACAAAAGAACUGAAGGCUCCAGGCCAGCC  
>N3116  
GACUGGCAGCAAUGGUGAGAACUGGAUCUAAGCAGCAGAAC  
>N3117  
UCAUGUAAUUUGAAACCAGGACUGUAACAAAUAAAACCCAG  
>N3118  
GACAGCUAACUACUACCUGGACUAAGCGGACACUGAUGUUA  
>N3119  
UGUCAUGUAGACAGGGCUGGACUGGGUUCUGAUCCCGCCU  
>N3120  
GAUGUAGUUAUCCAAGAUGAACUGCGUAACCUGAGUGGUUU  
>N3121  
GGAGAGGAAGAAACAAGCAGACUUCUGGGAGUUCAAGGCUA  
>N3122  
CAUAAUUGGAAUGUAGUAAAACUGAGCCACACAGAAUCCCA  
>N3123  
AGCUGGUUAUCUCUCAUCUGAACUGCUGUGCAGUCAUGGAUA  
>N3124  
GCUCCAGACACCAAGAAUGGACUGGCAGGGGAUGAACCUUC  
>N3125  
UUUCUGUGUCUCAUAUCAGGACUUGAGAAAGGGAGCUUGGA

>N3126  
UCGACCUUAGAGCAAAGAAAACUUCCAGUGACAGGAAAGAU  
>N3127  
GCUGCUCUUUCUGGAACAAGACUUUAAUUCUGUUAGCAUUC  
>N3128  
AGUUAUGUGAGCAGUUAAAAACUCAUUUCAAGUCAUAUAUU  
>N3129  
UUCGAGAAACCAUUAGGCAGACUAAGAGUUAAAAAAGGAGA  
>N3130  
UCCCUAAUUGAUUAUGGGAAAACUCAGUCAGAAGGUGUGUGA  
>N3131  
ACUAUCUAGAAAGUCAUCAGACUCACUUGGCUAUCAAGUAU  
>N3132  
AUCUCUGGCGGUUCUUCUGGACUAUCGAGCUUUAGUCCCA  
>N3133  
AUAUAGAAUAGAAAACAGGACUCUGAAUGCUCAGAAGGAA  
>N3134  
UAAAAUAAAAGAACUGGAAACUCUGUUGGAGUUAACUAUU  
>N3135  
UCAAAAUUGAUCACCUUUGAACUGCAAUCCUAUAGGUGGAA  
>N3136  
UGGUGGGACCUCUACCAGAAACUCCAAACUUGUCACUUGUU  
>N3137  
GAGGCAGCCUACCUGGCCAGACUGUCUUCAGCAGCUCUUUC  
>N3138  
CACACAACAUAUUGCAAAGGACUACUAUCUCAUACCAUAUG  
>N3139  
GAUAGUAGCUUUUAUUUCUGAACUUACUCUUACACAAAACAG  
>N3140  
UUGGACAUUCAGCUUUGUGGACUGAGCAGUUACUGGGCUCU  
>N3141  
GGCAUAUCACCAACUCCAAAACUAAGAAUAUCAUCAGAGAG  
>N3142  
GGUACCUCUCAUUGGCUUGGACUAAGAACUUGGGGGAAACU  
>N3143  
GCAGCUGAGCAGUUAGACAAACUGCAAAAAGCACUUCUUGAA  
>N3144  
AAUUUUGCCCGUGUCAAAAAGACUGGCACUCUGGACAUGUCUG  
>N3145  
UUUCCAUGGUAGUUUUUGAAACUAUAGUAAGUGAGAUUAUU  
>N3146  
CUUUUACUUUAGAGGGAAAGACUGACUAUUCUAAGGCUGUA  
>N3147  
GAGGGAGAUGAGGGAGAAGGACUUGAAGGACAAGAAGGGGA  
>N3148  
CUUGUUGACUUUCUUAAGAACUAGCUCUGGUUUUGUUGA  
>N3149  
AUAUCUAUCACAUACAGGAAACUGCAUACAAUGUAGUCUUA



>N3150  
ACGCUUUCAUCAUGGAGGGAACUCUUAUUGCUUUUUCUUUCU  
>N3151  
UAAUGAACUAAAUCUCUGAAACUAUAAGCAAGCUUCAGGUA  
>N3152  
CUUGCUIUUAACGUGAUUGAACUUCAAGUUUCAUGAGCAUA  
>N3153  
ACUGAGCUAUGCUGAACCAGACUUGCUCUUGCCUCACAUG  
>N3154  
CAAGGUGGGAAUUAUUGAAACUUAAGGAAUUAUAAGACC  
>N3155  
CCCUGUUAUGAUGAUAAUGGACUGAAACUCUGAACUUGUAA  
>N3156  
UUAUUGUAGCUAUUCCAGAACUUCUGGAAUAAUUAUAC  
>N3157  
GUGAGGGAUUAAAAGGGCAGACUCCUUUCCCCGCCUGAUAA  
>N3158  
UUUAUAGAUGAUUGUUAGGGACUAUGCUGGUUAAUAAAUU  
>N3159  
UUCAUAGACAACUGGGCAGGACUCUUUGUUAUCCCCUCCU  
>N3160  
CCCUGGGAAAAACACAGAACUAGACUACUUUUGUCCUUU  
>N3161  
CUUAUUAAUAGUCUAGUAGACUUAAGCAGUGAAUCCACAU  
>N3162  
UUUCUUAUAGCUCUAGAAAGACUUUUAUGGGUUUGUGUGG  
>N3163  
AGACAAACAGAUCUUAGAAGACUGUUAGCCAGUCUAGUAAA  
>N3164  
UUACUUGGUUAUAUACUCAGAACUAAGUAAAUUUCUUUUUAU  
>N3165  
UGUGUAUGGUGCACAGACAAACUGCAUCCAGAACACAUAAA  
>N3166  
UUUAAGGGCAAGCACUUUGAACUGAAUUAUUUAAGGAAA  
>N3167  
AUAUGUAUUUUUAUUUCAGACUUUAUUUCUUGAGAUUGCU  
>N3168  
CUAAUGUCAUAUCAAAGGACUGCCUAAUACACUUCAGA  
>N3169  
CAUGCUIAUAUUGGUGAGGAACUGUUAAGAAAGCAGGAAC  
>N3170  
ACGGAACUAGAUGUUAGAGGACUUUGUUGGUGAUGCUACCC  
>N3171  
UAUUCCAAGUGUUAACAGAACUUAACUCUGUGUUUAUAGAU  
>N3172  
GAUGUAAACAUGAGGUCUGAACUCUACAACGCUACAUUUUG  
>N3173  
AUGAAUUCCAUCAUCCUGGACUCUCCCUUGGCAACAUAG

>N3174  
GAAAGUUAUUAACACAAGACUACUGAAUUACACAAGUA  
>N3175  
GGUUCUAAAAGAUUUCAAACUGAGCUGCUAUUUUCCUA  
>N3176  
CCACACCACUCCAGUGAAGACUUCGUGGCAACCCAAAAG  
>N3177  
UUAGUUUUCUUUCUUCAGAAACUCUACUACUGAUGUUGUGG  
>N3178  
AAUAUCCACAUGUAGAAAAGACUGCAAUGUUCUUACUCAU  
>N3179  
UAAUCUAAUUUAAAAUAUGAACUAGAGCCAUGAGUAUUCAU  
>N3180  
UCACUUUUUGUGUGUUUGAAACUUGUUCUUUUUAUUGGUU  
>N3181  
UAUAAACCCAAUAGGAUUAGACUCUCCAAAGGCCACCUG  
>N3182  
GGACACAGUUUAUAGCUAGGAACUAUACCAUUCAUUCAU  
>N3183  
CCACCUCAGCCACCACUAAGACUGAUACUGAAAUAAAUCAU  
>N3184  
CAUUCUUAUAAUAUAAAAACUGGGGGAAUCACCACCCCU  
>N3185  
CCUGAAGCAGACAUUUUGGAACUCAUUUUUUUCUUCCUC  
>N3186  
UUAUUGGUGGGCCUUGUGAACUUUCCCAUUCACCUUUGA  
>N3187  
AAAAUAACUCAAAUAUAAAACUCUAUUUUGUUAUUGAUUU  
>N3188  
GAAGCAGAAAAUGAGCCAAACUCCAGGUCAGCCGUCUAAA  
>N3189  
AUGGUUCUAUUCUCUCUAAGACUAUUAGGAUACAGGGACAC  
>N3190  
UCUAAUACUUAGUUCAUUAGACUAAGCCAGCCUUCAUUAUA  
>N3191  
UACUUUUGAGAAUUUUGUAGACUGCAGUUUGAGCAUAGUCA  
>N3192  
ACAUUUUUGAGAAAAGGGGGACUAGGCUUCUCAAGGGGAAA  
>N3193  
UUGUUAUGGAGAAGUUUGAAACUAAAGACUAAAGGGGUUGG  
>N3194  
CAGUCCUUUACUGUUUGGGACUGUUUUAGAUGUCCUGGGG  
>N3195  
AUAAAACCUCUACAAUGAAAACUUUAAAUGUAUGAAGAAAG  
>N3196  
AGACUAACCUUUGGUUGGAACUUCUUGGAACCACGCAUUU  
>N3197  
UAAACCUUGGAUUAUGAGAAACUUCAUAGGACAGAUGGCUA

>N3198  
GGGAUGGAAAUGGAGAUGAGACUGAGAGAAAGGAGAUC CAG  
>N3199  
ACAUUUCUAGUAAGUCAUGGACUUCUUAACUAGAUUCUUG  
>N3200  
GACCAUUAAGAUGACCAGGACUGCUGUAAGAAUUUUUGCU  
>N3201  
UUAUUUAAUUUGGGCAUGGGACUGUUUCUUUGACUGAGUGU  
>N3202  
AGGUGAGAAGGGAGCCUCAGACUUGGAGGUCAGGUUAUAAC  
>N3203  
GAAAAGCUAACAUAAGAAAACUCAACCAAGCUGAAGUCA  
>N3204  
AAUUUCCAAGCUGCAUCUGAACUGGCUUCCAAUCCAUCUAU  
>N3205  
UCAGCUCCACUGGAGACCAGACUGUCUGUUUAUAGACCAUU  
>N3206  
CUAAAGAUGUACAGAGAUAAACUGACAGUGUUACCAAUUG  
>N3207  
UGAGUUAAAAACCAACCUGAACUACAUAUGAUAUGUCUC  
>N3208  
UUAUGUGUAUGGUGAGAUGGACUAUAACGUUCAGCCCUUGA  
>N3209  
CUAGCCAGAGUUGAGAAAGACUAGAAAGAGUGAGGUUAUU  
>N3210  
UUACCAUCAAGGAUCUGAAAACUGUGAGACUCCACUCUUC  
>N3211  
AUUUCGAAGUCCUGGGGAAAACUGUCUGUUUGGGCCCCGA  
>N3212  
GUGUGGCAUGGUUCUCCAGAACUGUAGGUUAUAUGAGUUUA  
>N3213  
UUAGAUGAUACAUAAGAAAAACUAAGUUUAUUCUAAAGAAA  
>N3214  
AUGUUUUGCCAGAAGACAGGACUACUGGCAAUGAAGAUUGG  
>N3215  
UAUAAAUGAAAUAUCUCUAAACUUAUUUACCAUAAAGACU  
>N3216  
UAGAAGUAAGCAAAAUAAGACUCUAGAUUGUUAAUCCAA  
>N3217  
AGGAAAGUGGAGGUAGGGAAACUGGGAAGACCAAAGGUAGG  
>N3218  
AUACUAUUUAUAGAACAAAACUUCCAAUCAUCAUAUGUGG  
>N3219  
AAGCAUAUGGCCAAUAUUAAACUAAAGGAAGAGAAAGAAU  
>N3220  
UGGAAGACUAGUAUUUGGAGACUGGACCAAAGUCUUAGGAU  
>N3221  
UGCAAACCACUGGAUGAAGAACUGUCUCACCCACCACCAAU

>N3222  
CAAAGUAAAAAAAAAGUAUAGACUGAGACAUUGACACUCGGA  
>N3223  
UAUAGUUUACAGUUUUGUAGACUGAAAGUUCAAGAUCAAGG  
>N3224  
ACAGGCAAAGGACCUGAGAGACUGCAGUGAGCCUCUACUG  
>N3225  
GAACCAUCCUGGGGAUGAAGACUACUUGACCAUUCUGGAUA  
>N3226  
AGAAAAAUAGAGAUUCAAAACUCAAAAAGAACAUAUCUUGGC  
>N3227  
GCCUGCAGAAAUCCUUGAAACUCCCAGGGCAAAAUGACGG  
>N3228  
GCAAGUAAGAGGUCAUGAAAACUUGGAAAGUGGUAGAAAAU  
>N3229  
GGUGACUUUGCUUUUGAAGAACUUUUAAGGAAGGAACUCCU  
>N3230  
GGAUGUGGGGAGGGGCAAGACUGGGAGAUUGGGGAAACAG  
>N3231  
ACCUCCUGGCACAGUCUGGACUGUUGUACUGGCUGAAAAC  
>N3232  
CAGGGCACUUAGUGCUAUGAACUUUCUUCUAGCACUGCUU  
>N3233  
UAUGUUCUJCCCUJGGGAAGACUAUUUCUUCUGCUCCACA  
>N3234  
AGGUACUUUCUAAAUUUGAACUGACAGUAUCAGCUCACCU  
>N3235  
CCUJGGUGUUJGCCUAAAAGACUUGACAAUUGUGUCCGCUA  
>N3236  
GAAUGUAAUCAUAUAACAGACUAGAAGACAACAAUCCAGA  
>N3237  
ACAAAACAAAACAAAACAAAACUAGAGCCCUAACACCAAU  
>N3238  
AUAGCAUACAAAUGGUGAAAACUAGGCAUUUGUUCUUUUUG  
>N3239  
ACAGUCAAAUAUUAGGAGGAACUCAAGUAGUCUUCUGAAAG  
>N3240  
CAUUUUAGUAUCUCACAGAGACUUGAAUAAGCUAGCUUGUC  
>N3241  
GGGAGGAAGACCUGAGAAAAACUUGCUAAGUUCCAAUCUGA  
>N3242  
UUAAGGAGGAAAUJGCUAGAACUCAUCUGUGUAGUUCUUU  
>N3243  
CAUGGCAUAACAAUAUAUGAACUCUCCAGGAACUGGUUAUA  
>N3244  
ACAGCAUGAGAAGCAGUAGAACUUUAAGUGUUUUUCAUGC  
>N3245  
AGCUGGACUCCAGGAGGAAAACUUAGCAGAAAUAAGAAGU

>N3246  
UCAAAACAACACAAUCUCUAAAACUACCUAAUGACCCACCUUU  
>N3247  
UCCUGGCAGAAGAAACCAGAACUAAGAAAGACCUCACUGAC  
>N3248  
UAGAAUGUCAAUCUUAAGAACUUUUGGCUAAAACUUGAAU  
>N3249  
UGCAAUAAGUAUUCAUUUAAAACUGAGUUCUCAGCUUAGAGU  
>N3250  
AUAUACCUGUCCCAUUUAAGACUGAAUACUCAGUCUCUGAG  
>N3251  
GAGAAGAGAGUUUAACUAAAACUAAGCAUCUAUGGAAAAGC  
>N3252  
CUACCAGCUGCUGGGUAGGAACUCUCAGAAGACAGUUAUGC  
>N3253  
AGCAAGUUUGGCUGAAAGAGACUUCAAAAUAAGAUUGAUA  
>N3254  
CAUGAGAAAUCAGGACAGGAACUUAAGCAAGGCAAGGAGGG  
>N3255  
UCUGGGCAUGUCUGAGAGGGACUGCAUAGGCUGAAUUAAGU  
>N3256  
UCAGCAGCCAGCCAGAAUAGACUGGAGCUAAGGCAACAAAA  
>N3257  
GAGCCUCUCUUGGAGACAGGACUCGGAAGACCAGAAUUGGA  
>N3258  
CUCGGAAGACCAGAAUUGGAACUAUGUGGAAUGUGGACGUG  
>N3259  
GGGGCAUUCAUAGUACAUGAACUGUUGCCUGUAAGUAGUAU  
>N3260  
GAAAAAAGAAAAAAGAAAACUCAUACUUUUUGGCUUCCC  
>N3261  
UUACUCCCUGAUGAGAACAAACUUCUUCUAAUAUCUGUAA  
>N3262  
CUUCUGCAAGUCCCAAAGGGACUUAUCUUCGCCACUUUGUG  
>N3263  
UCUUUCUCCAAUUGUCCAGGACUCACGAUUCAUUGGCCAAA  
>N3264  
CCACACUCUUCCCUGUGCAGACUUGUCUCAGCAGGAUCCAG  
>N3265  
GUCUGGUCCCCGAAACAGGGACUGUCCCAGAAGCUCUGUAG  
>N3266  
CUCGUGGAGGUCAGAAUAGACUUAUAAGAGUCAUGAACUU  
>N3267  
AAUUGACUUUUAUAUGUUGGACUUAUGUAUUUCAACUUAAU  
>N3268  
GAGUUUAAAAAAAAAAAAAACUAUUUUUAACUUUUACUGA  
>N3269  
AAGCAUACACUCAUGUAAGAACUUGAUCGUAAAUUUUCAUA

>N3270  
ACUGGUUACACUCCAGAGGACUGGGUUUGACUCCCAGUAC  
>N3271  
UUUUUUUUAUAGUUUUUGAAACUUUUACAUUUUUUACUUUG  
>N3272  
GAGGCACUGUUGGGAAUAGGACUCACUGUUGUGAAUUCACU  
>N3273  
UGAACUUUAGUGAGAUUAAGACUUGUAUUAAGCCGGACCU  
>N3274  
UAUUGAGCCCAAACUGCGGACUUGUUGUUUAAGGUGUUCU  
>N3275  
AGAAGAGGGACAGAGGCUGAACUUAAGACUACAUCAUAAUU  
>N3276  
UGCAACAACCAAAAAGAAAAACUCUUCAUAUAUCCUCAAAU  
>N3277  
GUUUCUCUGAUCCCUUGUAGACUUCUGACAUCUAGGUCUGU  
>N3278  
CGACAGUUUAUACACUGAAAACUUUCCAGAGAACCCUGAGC  
>N3279  
AAACACAUACUCAACAACAAACUCACAUA AAAACCCAGAGA  
>N3280  
GCAA AUGGAAUUCUUACAGAACUCUCAAAUUGCCAAAGACU  
>N3281  
ACCAGGCUCACUCUCCUGAAACUCAUUCAAAACAAAUCCUG  
>N3282  
CAUACAUUCAGGACCAGAAAACUGUCAUCUAGGAAAUGUUC  
>N3283  
UACAACUAAAUAGCAGCAGAACUUUCAAAUUCAGAGCAAGU  
>N3284  
GAAGACACAUUAAAGAGAGAACUUAGGAUGAAGGACUCAUG  
>N3285  
UCAUGAUGCUAUCAGAAUAGACUAUUUUUAUAAAUACAAGAA  
>N3286  
AUGUCCUUCAGAACCCAAAACUGAAGACAUAGUAGCAGUG  
>N3287  
UCAAGUGAAUUGACUUCAGACUCUGAAAGUGCUGAAGUCA  
>N3288  
CGGGGGAUAAACAAGAUAGACUUCUUUGUUAUUGUGUUCU  
>N3289  
UCCGGGAAGUUUUUAUUCAGACUUUGGAUGACCUUACUUGG  
>N3290  
UAUGAUGUUUGCAUUUGAAGACUGCGGUUAUGGAGAUAAUU  
>N3291  
GUGAUUUAGCUAGGAAGAGGACUGGACUAUAAUGUGUAACA  
>N3292  
CUUGAAGUUCAUUGUCCAAACUAAGGUAUCCAAGCUCUCA  
>N3293  
GCUGGGUAGAAUGGUUGAGGACUGAGUAGGAUUAUCUGGUC

>N3294  
UCCUGCAAGCUGACCUUUGAACUCCACUCAUGUAUCACAGU  
>N3295  
GCUGUGAUUAUGAGCUUCAAACUCCACAGAAAGAUUUUAU  
>N3296  
ACAAUAAAAGGACAAGAAGACUUCUAUGGUUCCAGUGUG  
>N3297  
CCAAAGCCACGGAAACAGGAACUCUUCUCCUCAGAGAACUG  
>N3298  
UGAACACUCUUAAGAGCUUAAACUAGAGUAUCUGAAACGGUU  
>N3299  
UCCAUCUUAUUUAUGAUGGACUUUUAAGGACUCCAUGAAC  
>N3300  
GACAAAUGGUUUUAUGUCAAAACUAACCUGAGGGAAAUCAUU  
>N3301  
AUAUGAGCAGCAACAAAUGGACUUAGUAUAUAAUAGUUUUA  
>N3302  
AUAUGACCCAUCCAAAGAAAACUGUCCAUGAAAUAUGCAUC  
>N3303  
GAUAAAAGAACAGCAUGGGAACUGGAGGGAAGGGCAUUUCU  
>N3304  
ACUCUGAAUAAAUAACUAAAACUUUCAAGCUUUUAUUUUUC  
>N3305  
AAAUCUUUUAUUUCAGAGAAACUUUCUUAACACUCCCACU  
>N3306  
AUGCAAUGUGGCUUUAAUAGACUUC CAGAUGAUUACAGAGA  
>N3307  
GGCAAAGAACAGAGACCAGACUGAAGUGUCUUGCAAAGC  
>N3308  
AGUCAUGGGGGCUGGGUGAGACUGCUGUUGUCACCACUAGG  
>N3309  
ACAAUUUUCUUUCAUAGAGGACUUCAUAAGAGAUUUUUUUU  
>N3310  
AGCUGGAUACUGGAUACAAAACUGCCCUUACCUCACCUACC  
>N3311  
AGGUCUUAUAAAUCCAGGAACUGUCUCAGUCCUUGGGCUG  
>N3312  
UAAAAAAUAAAUCCUUUAAAACUUUAAAUAUCUUCUUGGGA  
>N3313  
UGAGGGUGAGUUUGAUUGAAACUCA AUGUGUACAUAUAUAA  
>N3314  
AUGUGAAUCUCAGCAGUGGAACUACACUCAGGUCCCUUCAU  
>N3315  
AAAGGCAGAUAAAUACUGGGACUCUAAACUGUUUCCCAUUA  
>N3316  
GGCUAUCUGAACAUUGGAAACUACAGUCACUCUACUGAAA  
>N3317  
UUACACAUGGUAACAUUUGGACUUCUUUCUUUUUUUUUC

>N3318  
AUGCCUUUACUUCCCACGGGACUGAAACUAGCAAAGUGUUG  
>N3319  
UGCCUCUCAGGUACUCUGAAACUCCCAGGAUCACAGGAUCG  
>N3320  
ACCUCCAACACCUAGAGAAAACUUGACUCCCAGGAACUCUG  
>N3321  
CAGGUCAGUAGGGACCUCAGACUGCACUUCACAUAGCCCGA  
>N3322  
AGAACUCCAAUUCCCUGGAAACUGACAUUGACGGGGGUCCA  
>N3323  
AUUUUUUUAUGUCUUACAAACUCCAUUUUUUUCUUCAGUG  
>N3324  
CAACCAGGAGAAGAAUGGGAAACUAUGAGGUGUGGUGAUGUU  
>N3325  
AUUUGACAGUCAUAUAUAGACUCAGAGCAGUGAGAGAGCC  
>N3326  
AAUGUCCAUUGAACCAGGAACUCAGACAUCCCCUGGCCA  
>N3327  
AGAGAAGUAAAUCAGGACAAACUAGCAUGACAUAUAUGUAU  
>N3328  
CCUGUUCUCAUGUGCUUGAGACUCUUCCCUAUGUUCUUUUC  
>N3329  
ACAAGGUCUGACCUUCCAGACUUGCUGCCACCUGCGAGGU  
>N3330  
UUUUCUUGUUGACCUAUA AAAACUUUGUCUGGCAGAAAUACC  
>N3331  
AGAAUGCCCAUGUUCCCAGAACUUCCCUAUGAGACCACUGG  
>N3332  
GAAUCUACCUAUUCUCAAACUAAACAUCUUCACAGGUUC  
>N3333  
UGUAUAAGAUAGAAUAGGGAACUCUGUGUAGAAUUUUCAA  
>N3334  
CUCUGUGUAGAAUUUCAAAAACUAAGAAUACUACUCUCUU  
>N3335  
UAAGGUACUCUGCUUUGAGAACUAGGUACUUAACAUGCAGU  
>N3336  
AGAUAUCCAGUUC CAGCAGGACUAAGUAUAUCCUCUCCCAC  
>N3337  
ACACAGCAUUGCAAGUAAGGACUCCUAAAUGGACUACA UUU  
>N3338  
GGCACAUCUAUCUCCUCUAAAACUAAAAUAUCCCAACAAUCU  
>N3339  
GGACAUCUCUGCAGUCCCAAACUUUGGGUUAAAACCCCUGG  
>N3340  
AUGAUGUCCUACGUCACAGACUAACCAUUGAAA AUGUUC  
>N3341  
CUAAAUCACUGUUCUAAAAACUGUAAUAUAUAUGAAUAU



>N3342  
AUUAGACUUACAGAAAUUAGACUUAUUUUUCAAAGAUAAU  
>N3343  
ACUUUAAUAGACAAGAGAGGACUCAUGAUUUUUUGUAGU  
>N3344  
AGACUUUUUUUAUUCAGAACUCAAUAAAUGGCACCAAG  
>N3345  
UCAUUUUCAAACCCAAAGGAACUGACAGUGUAAGAGAGUAU  
>N3346  
UAAGAUACUGAAUUCUUCAAACUGUGAUUUUAACACACA  
>N3347  
UGUAUACACAGGGCAUGGAAACUCUGCUCCCUUUUCUCAU  
>N3348  
CUUUAUCCUUAAAAGGAAAAACUAAUGAAUAAAAGAAUGAG  
>N3349  
AUAAGGAAUUACAAAUUCAGACUCCAGGCUAGGAGACAGUC  
>N3350  
AAAACUAAGAAUAUCUAGACUAUAACGAAAUAAUCCAG  
>N3351  
CCAUGCCUCACCCUACAAAAACUGAGAUUACAGAUGUGACC  
>N3352  
CCCUAUGCAGGGGAUCCUGAACUUUAUAAGAAUGGAAACUG  
>N3353  
GGUAUCUGACCGCCUGAGGACUUUGCCACAGCAUCUGGGC  
>N3354  
AUUCAGAAUGUGAGGAAUGAACUGUCAGUUAGGAAGCACAG  
>N3355  
UCUAACAUACAGUAGUGUAGACUAAGCAUCCCAUUUCAAG  
>N3356  
GGUUUCUGCAGGAAACCUGAACUCAGGUUGCUGAGUACUAG  
>N3357  
GAACAACAAACGGCUUCAGAACUCAUGGUCUCUGUCCACC  
>N3358  
GAUAAGCACCCUAGGAAAGAACUUAGAAGUGUAGGUUGCCA  
>N3359  
AAGUUACAUAUAUGCCAUGGACUUGUUUUUCAGCUGUAGUG  
>N3360  
UUCUUCACAGAUCUCCAGAAACUUUCCCCAAGAUGUUAAG  
>N3361  
ACGGAGGAAUGUGGUGAGGAACUGUGGAAGGGGGACUCGG  
>N3362  
CCUUAUAUAUUUCUCAGUAAACUAACACUUAUUAUAGUGA  
>N3363  
AUGACAAUACCUCCUUUAGGACUGUGUGUUCGAGAGUCUUU  
>N3364  
UUCAAUAGCUGCCUAUAUGGACUCUUCCCUCCCUUCCCUU  
>N3365  
UGCCAUCUUUCUAUUUUAAACUGUUAUUAAAUAACUUAU

>N3366  
AGAAGGGACUGUACCCUUGAACUAUAAACCAAAUAAAUCU  
>N3367  
GAUCUGAAGGCAGCCAGAAGACUGUCCCCUGCAGGCAGCCA  
>N3368  
GUGCCUCACUGUGGAGGCAGACUUUAAGUUCUCAUAUGCUU  
>N3369  
CACAUUGGUUUAUCAGUGAACUACUGUGAAUGUAACCAGA  
>N3370  
AUCCCUAGGUUCAGUGAGAGACUCUGUGUCAAAACAAUAUG  
>N3371  
UCCCGGAUGUUUAUGGUAGAACUCAUAUAUAUCAAGGAUAA  
>N3372  
GUGUUUGUCUUUACCGUUAACUCUUCAGCCACCUCAUUG  
>N3373  
AACCAAUCACUCCACAAGGAACUGCGUUUUUUGCCAGUUUG  
>N3374  
GUAAAGACAGACUAUUAAGAACUUUGUAUUCUGAUUUCUUC  
>N3375  
CACAUUCUAUCAUAAGAAAAACUUGUGUUUGAAAUGACAGC  
>N3376  
UUUUUUAGAAUUACAAUAAAACUCAAAAUUUAAUGGCCUUC  
>N3377  
GAAAUCCAACAGUAGAAGAACUUCUUGAAGAAUGUUAUAU  
>N3378  
CUGCAUCAUUCGCCUUCAGACUGGUAGUUCAGAGCCACUG  
>N3379  
UGCUUCCAUCUUUGUCCUAAACUUAAGAGUGAAGCUGCUAG  
>N3380  
GGAGAGAGAUUGAGCCAGAGACUGCUGAUGUUUCACUAAAU  
>N3381  
UGGUAACUGCUGGCAGAAAGACUAUCAUUGGCUUCUCCAC  
>N3382  
GGGGGAGAGGAAGAGGGGAAACUGUGGUCAAGACAUAAAA  
>N3383  
UGCCAGCACCUCUCUGAUGGACUCUGGAUGGAUACUUCUAA  
>N3384  
UCUAAUUUUUCCCUUUUAAACUUUCUUUUUUCGUCAACAA  
>N3385  
GCAGUUGCUUACGCUUGAGAACUAAGGGGGAAAAUAGUGU  
>N3386  
UUGGUACAUCUUUUGGUGGAACUGUUUGGGAAAGACUAGGA  
>N3387  
UUGCAUCCUCAUACCUCAGAACUGGUAAGAUAAAUCCUCA  
>N3388  
CCAGAAUGAAGCAUAUGUAAACUCAGUUGAAAACCUUUUGU  
>N3389  
CCACACCUGAGCUUAGAAAAACUAUACUUACCUUCCACGCA

>N3390  
AGAAUGAGGGCAGCCUUGGGACUGUAGCUCAAUGGUAGAGC  
>N3391  
UUAGCUUGUCUACUAUUUAGACUUAACACACAUAUCCAUUU  
>N3392  
AAUCCUAGUGAUUAUAACAAACUUGUGUCUAAAAAGAUAA  
>N3393  
UUCAUACUAUGUGCGUGGAGACUUAAAUGAGAAAUAAGU  
>N3394  
AGGCUAGCUAGUCACUGCAAACUUAACAAGUAACAACAGAC  
>N3395  
UUUCUACAGUGAACUACCGAACUCUUAGGACGAGACAAGGG  
>N3396  
AACAAUAGCCUGUGUGUCGAAACUAUAUAAUUAUGAGUAUG  
>N3397  
GAGAAGGAAAACAGACCUGGACUAGCCAAUACUCUCAUUU  
>N3398  
AGCUUUCUACAUUUCUACAGACUUUACAUAUUAUCAUCUAA  
>N3399  
CAUAUUUUGAGAGUUUAAGGACUCAAAACUAUCUCUAGAUUG  
>N3400  
GUAUUUGGAAAAAAAAGGAAACUUCAGGAAUAUAAUGGAG  
>N3401  
AGUGAAAAGGAUCUUCGGAAACUCUGGGAAUUGAAACUUUU  
>N3402  
CCUGCCUAACAGAUCAUAGGACUUGUCAGCCUGUUAUCAUG  
>N3403  
UUCCCAACGUGGAACUCCAGACUUUGCAUCCUCAUGCUCAA  
>N3404  
UGCUGCACCCUGACUCUAAAACUAUAAUUUACUCAAAGCC  
>N3405  
UGAGGUGAUUCACUUACUAAACUGUAGCAUUGGGCUCCAUG  
>N3406  
AGAGCCUAGAAAAGGCAUAAACUGCCAUCCUUUCUGUGAAG  
>N3407  
AAGCAUCUCUGUGUUAUUAACUGUCCAGAGCAAUGACUAU  
>N3408  
GAUUCGGCUGUGGUUGCUGAACUUGGAUGCCUGAUUGUCUU  
>N3409  
UGUUUUGUUUUGUGUUCAAGACUGGGUUUCUCUGUGUAGUU  
>N3410  
ACAGAUUGGCGGAAUCUGGAACUAUUAGACAAAAGGCCCGC  
>N3411  
GGCUCUAAAUUGC UUUGAGAACUCUUUCUAAAACUAGACUC  
>N3412  
UAGACUUCAGGAGAAUUCAGACUCUAUCAAUUGUUACAUAUCU  
>N3413  
UUCCCAACACCCAUAUGGGAAACUCACAACUCUAUGUAACUC

>N3414  
CCUGCCGACUGGAAGUUGAGACUGUGCUCUCACGUUGCUCG  
>N3415  
UGAUCAGUAUAUACAUGGGAACUAUAGUUAUGAACAUAGGC  
>N3416  
AAGAUUCACUCUAACUGUGGACUUUGGAGCUC CAGAAUGAA  
>N3417  
AGAAGAGGAGAUGCUAUUAGACUGAUUUUGUUUACACUGCCA  
>N3418  
CUAACCAUAAAAUCAGCAAAACUGAUGAAAAUCUUUUUU  
>N3419  
ACUAGCAACCGGAAUAAAGACUGGUGAGAAGAAACCAUGA  
>N3420  
GAGGCUUUAGGACUGCCAAAACUCCAGCUUCGGGCUUGACU  
>N3421  
GCAUAUGGGUAGCCCAACAGACUGCUUACAGAAACCUUUUG  
>N3422  
CCCACAGCAAAUACAGUAGACUAAAAACUAACAGGUGAAC  
>N3423  
UAACUUUAAAAACCAUUUAAACUACUAUAUAAGAGAUGGAA  
>N3424  
CCAUGCCUGGCUGACCUGAAACUCAUCAGCAAUCCAGGCUG  
>N3425  
AUGUCUCAA AUGCUGGCUGGACUCUCCACA UCCUCCUA  
>N3426  
GUGCCCUUUGUCGCUCCAAACUCUACAGUUAGUACUAGAA  
>N3427  
UGUACUUUCAUAUCUACAGGACUAAGUCAUCAUGGGUAUAU  
>N3428  
AGAGCAACACAUCUCUUGGGACUGGGGUCACAGAGGGUUGU  
>N3429  
ACGAUGACACCAUUGCAUAAACUAGCAAGCAUUUGCUGAAA  
>N3430  
UAAAAACCUACAUAUAUUGGACUUUGGAUAAUAGGUAAAGA  
>N3431  
UUUUCUGAACAAUGGGUAAAACUAAGAUUAAGCUAUGGUU  
>N3432  
CCAGCUGUGCUGGGCUCUGAACUGUCAACAGCUUCAACAGU  
>N3433  
AGCCAGGGCUACAAAAUAGACUCAGUCUAAAAAAAAAAAA  
>N3434  
ACUGUGGUUCUAUGAACUGAACUCAGAUGGCCAGGCUUGCA  
>N3435  
CAUAGGUAAAACUACUUCAGACUUCUUGUGCUUUAAGGGA  
>N3436  
AGCAGUACAACUCAUUUAAAACUCAAGGUUGAGGGCCUUGG  
>N3437  
ACUCGGGAGGGUGAAGCAGGACUGUGUCUCAAGCUGGAUUAU

>N3438  
GGAGCCAGAGCAACUUAAGACUGAAUGGCCAGAAGACAAA  
>N3439  
CUGAAUGGCCAGAAGACAAAACUGAAGAAAGCCUGAUCUGU  
>N3440  
AAGAGGCAAGCCUGUAAAGAACUAUCUAAUUAAGUUAGUAG  
>N3441  
GUUGCCUAAGCUGGUCUGGAACUCAGGGGCAACCUUGCCUC  
>N3442  
AGUCAGAAAUGGCACCUUGGACUCACAGGUUCAUGUGUCCA  
>N3443  
GAAUUGUUCACAAUCCAAAACUAUUUGAUUACUAACAAAU  
>N3444  
GACUGUACAGUAGAAACAGAACUAAGUGACAUUAAACGGUG  
>N3445  
UUGGUUACAAAUUCUUGUAAACUUUCCUUUCCUCUAGUGG  
>N3446  
AAUAAACUUCAUUAAGAAAAACUUAUAAGCCUCCUCCUCC  
>N3447  
GCUAUGUCUGCCUGUAAGGGACUCUUUGAUUUGCACUUC  
>N3448  
GAUGGUUAUGGAGUGAAUGAACUUAUAAGAACUGAACACUU  
>N3449  
CGCAACUUAUGUACGAUAAACUAUUUAAGUUCUACCUAUG  
>N3450  
GAAUUCUAUUCUGUAUAGAGACUGAAGGUUUUGGGUAAAA  
>N3451  
CUUGGAAAAUUGUUUCCAGACUCUUACCCUGAGGUAGUGU  
>N3452  
AAGAGGGGACUAUAAUCAAACUUUUAGGGUCUUAGGUGCC  
>N3453  
UCUGGGGCCACGGAGUGGGAACUCAACAGUGGCAGAUAAAG  
>N3454  
UCCGGUUAAGGAGAGGCAAACUGUGGGAAGCCACAAUGUG  
>N3455  
GACACUAAAGACUUGAUAGAACUCAAUGAAGAAGAAUGCCC  
>N3456  
ACACACAAACAUAGCAUAGACUAGCAUCAGUUGUUAAUA  
>N3457  
GGUCAUUCACAUUGUUCUGAACUAAGGGUUCUGAAGUAAA  
>N3458  
AUGGAUUUACAUGUAGUGAGACUCAAUUCUAAACAAGAAGG  
>N3459  
UCAGAAUCUGUUUUAGAAGACUCCUGUUGCUUCAUGAAUG  
>N3460  
UUCUUUCCCAGCAAUGUAGACUGUAAAGGCUACUACAUAG  
>N3461  
UUGACAGCACAGACCAAAGAACUCCAUCAGCAAUUUCCAC

>N3462  
UGACCAUUGAAUUCUGGCAAACUGCUUUUAACUGUACCUGG  
>N3463  
GUUCCUAUCCACACAAUGGGACUUCACUUUGUAGUCUUUCA  
>N3464  
UGUGUGUGUGUGGUUUUAGGACUGAGCAAUCUGUACUGGAU  
>N3465  
AGAUUCCACAGAAAACACAAACUUAUGAUUUUUUUAGUU  
>N3466  
GGUUUUUAAUUUUGUAUCGGACUCCUGAGUAGCAUGGGAGG  
>N3467  
UAGUGGGCAGAUUUGUCCAGACUGCAGAUUAUUGUGAUUUC  
>N3468  
GGAAGCUAGCAAAGAUAAAGACUGUAUAAAACUGAGCAA  
>N3469  
GAAAGCAAUCUACAGAUAAAACUCAAUCCUCAUCGAAAUUC  
>N3470  
GCCCAAUUGUCAUUAAGAGAGACUUCAUCCAGGAAGUGAUGG  
>N3471  
UUGCAGACCCCUUAAGGGAAACUCUUUAAGUAGUAAGCAUA  
>N3472  
CCAUAGAAGAAAAAAAAAAACUCCUGGAUUCUAUCUUGAU  
>N3473  
GGCAUUCUUUCAUAUAUAAAACUCCCCACACAUCUCUCUCU  
>N3474  
GAAACCUCUCCCUCUAUAAAACUUUAACAAAGUCAGAAAA  
>N3475  
CAGAAACAACUGAAUGAGAAACUGUAAGAACUGGAACAGAA  
>N3476  
CUUCAUAUCCACAAUGGUGAACUCACAGUGGAUCCCAGCAU  
>N3477  
CAUUGCCGUCGGGUUUGCAAACUGGUACAACCACUCUAGAA  
>N3478  
UGUUCAAAAUGAAGUUUAAAACUUAAGAUCUAUGAAAGGUC  
>N3479  
AUGCAUGUCAAAUUGUAAAAGACUUGUUCUCAAUAUCCUCAG  
>N3480  
UAUGUUGAGGUACUUGAUAAAACUUAGACUUGAGCUUUGUAC  
>N3481  
AUGUUCUGGUUGAGCUUCAGACUUAUAUUACAACGAAUUUAU  
>N3482  
UUCUGAGAAUUUCUAAAAGAACUUAUAAAAGAAGAUUCUAA  
>N3483  
AAUGGAUAUGAAAAAAUAAAACUGCAGUUUUGUGAUGGCAA  
>N3484  
GUAGCUCAGGCUGGCAUUGAACUCUCUCUAAUUCUUUCUCA  
>N3485  
UUCAGGCUAGGGGAGGGGAGACUACACCGGGGGAAAAAAC

>N3486  
ACUCUUGAUGAUUUCAUGAGACUUUGCAGUGACAUAGAUAC  
>N3487  
GUUUGAUAUCCUUAUGGGAGACUCAGCUCUGUCGUCUCCGC  
>N3488  
CACCAACAAUAGAGAAACAGACUUCUAUGUCUGUUCUGGAG  
>N3489  
UUCCCCUCCUUCUUGAGAAACUCCCGACCUUUUGAAAUGA  
>N3490  
UGUUCACUUUAUCAGAAGGACUGAAGCAACCACGCUUUGA  
>N3491  
CAAAAGAAUGAGCCAAUAAGACUAAUUAACAUGGAAUAUGU  
>N3492  
CAGUAUCCAGAACUCCUGAGACUUUGCCAAUUCCAGAAUC  
>N3493  
AAGAAAUAAGACAUUAAAGACUUGCUGAAGACUCAAUGAAA  
>N3494  
CAAAAUGCAUUCUCCAUA AAAACUAGAAUAUUGUUCAGUUGU  
>N3495  
CAAAACAAAACAAAACCAAAAACUCGAACAUAAUUGGAUCAA  
>N3496  
AGUGCCCUGGGCUCAUAGGAACUCAGAGAGAAUAAACCAAU  
>N3497  
AAAGACUCCACAGUUUGAAACUUCCCUUGAUCAGUCUUCU  
>N3498  
CCCAGUAAUUUUUGUGGGACUGGUUUUGUUAUCAUUAUUC  
>N3499  
UUUCUCUGGGUUUAAAAUAAACUAUUAUUUUUGCUAAUGUA  
>N3500  
AUUUUUAAAUUAGUCAAGAACUAAGUAGUUCUUCACACAC  
>N3501  
CUGAAUGGCCUUUCUUCAGACUCUGCCAUACACUUUAUCU  
>N3502  
UUUCUCUGAAAGUAUUUGGAACUUAGGUUUAAAGAAUCCUG  
>N3503  
GAACACACAAAUUGUUAGAAACUAGCAUGGCAUACUCCUAU  
>N3504  
GCGUGGCAGGAUAAGAAUGAACUGUAUUAGGGUCACAAAUC  
>N3505  
ACCAAGGAACUCCACAUA AAAACUAGAGACAGUGAAAUAUA  
>N3506  
CUUACUACAUCCUCAGUGAACUUAUAUACUUUA AACAG  
>N3507  
AAGGGAAAAGAAUGUAUAAAACUGUUCAAGACCUGAAAGUA  
>N3508  
UGUAGGAACUGGAACAGAAGACUUCACCUAAAUCUGUGUU  
>N3509  
GUAAA AUGGUUUCUAGUUAGACUCUACUGUACGCAUAGGUC

>N3510  
UUCUUAGGUCUCAGACCAGAAACUGGCCAGGGACAUAUUGCU  
>N3511  
AACAAAGUUCUACAAGCUGGAAACUUUGAGUUGAGAAAUUUGG  
>N3512  
CCUUCAUCCCAUUUAGUGAGACUUAAGUCCAAAUAGAUAGC  
>N3513  
GUAGCAGUGAGAGAUGGGAAACUGGGGUAAACUAGCAGAAAG  
>N3514  
UUUGCAGGCCAAAUGGAUUGAACUAGAAAAUACCAUAAAUGA  
>N3515  
AAUCUCAGCCUAGUAGAGAGACUGGAUGGUCAGGCUCUAAA  
>N3516  
AUUUCGUGAAGAAAAUGUAAAACUGCUUGGAGAACAUUAGAA  
>N3517  
UAGGAAGAUAUUCUGUCCAGACUUGUCUUUGCCAGUAAGAA  
>N3518  
GCAUGGUUGCAUAUUACUAGACUAUUAAAGUGUGAGCAAUG  
>N3519  
AGCAGUGAGGU AUGACAUGAACUGCUUUUUUCCCCUGUCAAG  
>N3520  
GUAUAAGGAACCUUUUAAAAACUUCUAAAACCACCAAACAU  
>N3521  
UUAUUUUAAGACCUUCAAAAACUAUGUUUUGUGAGCCAGGC  
>N3522  
AGGCCUUCUCAUAAGCAAGGACUUCCACAAGCUUUGUCACA  
>N3523  
AGGUCAUUCAGUUACCCAAACUCCAGAAGCAACAGGAAUC  
>N3524  
CCCUAAGCUUUUCUGAGCAGACUGCUAUCACAAGUAGACCU  
>N3525  
AUGCCACCAUGUGGCAAGAAACUGCUAUAGAUGUGUAAAUG  
>N3526  
UAACUGCAACAGAGAAGCAAACUAGGAAUAAGUAAAUGUU  
>N3527  
CCCAAUAUGGAGCACAGAAACUCUAUAGAACCUUCACUGC  
>N3528  
AUUAGAGGCCAAAUAGAUAGAACUAGAAAAAAUUCGAGUGUU  
>N3529  
CUGAAUGAGAAACUGUAAGAACUGGAACAGAAGACAACGCC  
>N3530  
ACACCAAUCCAGUUUCAAAAACUUCUUUCUACAUUGGUUAC  
>N3531  
AAAGAAUGAUUUCUCUAGGACUCUGGAAAAAUUCCUUA  
>N3532  
CUACUCCAACAGACCUCUAAAACUCCCUAGGGCUUUAGGGUU  
>N3533  
UGUCCCUGACCUCAAGCUGAACUACAAAGCAAUAGUGGUAA



>N3534  
AUAUCCAAUAUGUACAAAGAACUCAUUCAGAGAACCAAAC  
>N3535  
AAGCAAUAUAAUGGUCAAAGACUUCUACAGUUUGACCCUUC  
>N3536  
UCUAAAUAUCAGUAUGUUAAACUGAAAUUUUAGUUCAUUCU  
>N3537  
AGUUAUUUUAGAUUGUAGAAACUCUUCUCCUCUUGUUUGGCA  
>N3538  
AGUGCUGAAAUUUAUACAAACUAAAAUCACUGUAUCAGAU  
>N3539  
UGGUGGUUACAUAUGUAUGGACUGAAAGGCAUUAGCAAUGA  
>N3540  
AGAUAUAGACAGGGAAUAGAACUUGGUGUCUCAAAGGGACC  
>N3541  
AUUGUGAGGCUCUGUCAUGGACUGCUGGAUGGCUUGGUGGG  
>N3542  
AACAAACUCAAGAAAAAAAACUACAUGAUCUAGUUAG  
>N3543  
ACCCUAAAACAGAAUACUGGACUCAAUUCUAGCAUUGCAG  
>N3544  
UGUAUCCUCACCUCUCUGAACUAGUCUGCGCUUGGACUCA  
>N3545  
GACACUGUCAAUAGGACAAAACUACAACCAAAGGACUGGAA  
>N3546  
CUUUUCUACAAGAUUCUUGAACUCCAUCUAUUGUUUGUGUG  
>N3547  
AUCACCAUAUUGUUUCAAGACUUUCUAAAGAAACAACACC  
>N3548  
CUCCAGAGCAGAGAGAUUGGACUUUUGACUUGUUAACGGGU  
>N3549  
GCCAGAGUUAGCAGAGGGAAACUUGUGUGAUUGCCUAUCAA  
>N3550  
AAAGUCUUAAGAAGCUGGAACUCAGGGUAUUGAUC AUGGG  
>N3551  
GUGUAGGGGUGUCUAUAUAAACUUCUUCUUAUGUGUUGGAA  
>N3552  
GAUAGGCAUACAUGC UAAAAACUGUUAUUGAUUUUGAAAGA  
>N3553  
CUUGUUUGAUUAUAGCCAGGAACUCGAAAUAGCCAGAUGCC  
>N3554  
UCAUUUCUCAUUGGAGUAGACUUUUGGAAUGGUUUCAGAG  
>N3555  
GUCUUGUAAGGGGUUCUCAAACUAGGAGAAUUUGCAUUUCA  
>N3556  
AAUAUUCAUUCUACUCAGGACUUACUCAGGACCUCUCAUA  
>N3557  
GACUAGACUAUAGACUAUAGACUAUAGACUAUAGACUAUAG

>N3558  
GUGUCUUUUGCCUUGCAGAAACUUUGGAGUUUCAUUAGGUC  
>N3559  
AUUUUCUGAGGAACCGCCAGACUGAUUUCAGAGUGGUUGU  
>N3560  
GUUGUGUCGGGGUGCCUAGGACUAGGUGGGGUGGGAGUGCU  
>N3561  
ACCAAUAGAAACAAAAGAACUGUACAAAGAAUCUACCAA  
>N3562  
AGAGAGACUAACCACAGAAACUGAGGAAAUUCACAAAUC  
>N3563  
CUAAUUACAAUACUCUUCAAACUAUUCUACAAAUAAGAAAC  
>N3564  
GUAUAUUUACCCUACAGAAACUUUGCAAUUUAUGAGGCC  
>N3565  
AUAUGGCUGGCCUGAUUAAACUACCUGAUUGAUUAUCAA  
>N3566  
UUCUUUGAAGGUCUGAUAGAACUCUGCACUAAACCCAUCUG  
>N3567  
ACCUGGAGUCCUAAUCAGAAACUCCUUGUAGACUGCUUUCU  
>N3568  
GGUACACAAUCACAAAAGAACUCAAAUGAUUGUACUCAC  
>N3569  
AAAUUAGCUAGUAGGAUGAAACUUCAGGUAUAUACCCAA  
>N3570  
AGCAGAGACAAUAAUAUGGACUACACCACCAAGGACCUCU  
>N3571  
UUUACAUGAAGAAUAGAGAACUCAAAUGAUUUGGCCUAAG  
>N3572  
GUUUUUUAUACUGUCUAAGACUCACACUAACUAUUUGUAC  
>N3573  
GGAGUGUGUGUGUGGGGGGACUUUUGGAUAGCAUUGGAA  
>N3574  
AAACAGGACCUUCCCAGAAACUGUGUUGCUUUGGCCUGUC  
>N3575  
ACACUGAAAUGACAACAUAAACUAAUUCACUUUAAGCUUU  
>N3576  
GAGGCCUCUUGGUCUUGCAAACUAUAUAUGCCCAGUACGGG  
>N3577  
CACAGUAAGCUUAAGGUGAGACUACACACAGGGCCUAUAUG  
>N3578  
ACGGAAACUCACCUCUGGAACUUUGGCAUUCUCAUAACCC  
>N3579  
CCUAUUGACAAAGAAUAAGGACUACAAAUAAAUAAGCCUUU  
>N3580  
CCUUUCUAACUAUAUGAAGAACUGAGUUGGAAUUUUGAUGA  
>N3581  
CACCAGACAUUCACCAGAAACUAUGAAAGCCAGAAGAUC

>N3582  
ACUUCAUAGAGUUUAAUGAAACUGAAGCCACAACAUACCCA  
>N3583  
AAAAAGCUAUUUAACAAAACUGGAAAUCUGGAUGAAAU  
>N3584  
GUAACCCACUAUUAACAAACUCAAAGACAAAACCACAU  
>N3585  
CACCUGCAAUACUUUCUAGAACUUUACACAGUCAGCAUGCA  
>N3586  
GCUUGCUGAAAUUCUCCUGGACUUUAAUUGCACUUUCUAAA  
>N3587  
AUAAAACCAGAGACACUGAAACUUAUAGAGGAGAAAGUGGG  
>N3588  
UGCUCUGAAAAGGAAUAAAACUGUAAUUCAUGUAAUGUAU  
>N3589  
CGUAGGAGCGAUCCAAAAGACUUCAACCCCCACAGUCCUG  
>N3590  
GAAGCCUCCUCGAGCUGGGACUAUUAUAGAGUAACAGCCA  
>N3591  
UUUGCAGCUUCUAUUCUGAGACUCGGUGCUACAUUUCCAC  
>N3592  
AAGCAGGGAGAACAGAGAGGACUCUAGCUGCUUGCAGAGAC  
>N3593  
CCCACAGGGCAGCCUCGGGGACUGCAGUGGCUGGAAUGCUU  
>N3594  
AACCUAGAAGGACUCAGGAGACUCAAAUUGUGUUGAAAAGC  
>N3595  
UUGUCUUUGAAAAGACAAAGACUGAAGUCAUUGUCACCCUU  
>N3596  
UGUGAGACAGAAGAUGUUGGACUCCCCAGAAACAUUUUUA  
>N3597  
UGCACUAAUUGCUCAUUAAGACUUGACUAAUACUAUAUGU  
>N3598  
AGGGUUCAUUAUUGGACAAAACUGAUACUUACUUUCUCCU  
>N3599  
AAUUGUUCUUUUGGAAAAGAACUGCAGGGACAAAUAUGGAG  
>N3600  
CCUAUGGUGAGUGGAAAAAAACUUCUGCCAGGAGGCAGGUU  
>N3601  
UAAUGAGACAUUAUGUAUGAAACUCUCACAAGAAAUCUUACU  
>N3602  
CAUCCAGUUGCCACUGGAAAACUUGCACAGAGAUGGCAGGA  
>N3603  
AUUUGUUCUUAAGGAUAAAACUGGCCAAUUUUGAUAAUUC  
>N3604  
UUGUUGAAUAACUGCUAAGACUAAGUGAUGUAAUAAAA  
>N3605  
AUAUGGUUUUAGGGAAUGAAACUGGUGUUUCCGGAAUGAGA

>N3606  
ACUCAUUAAGAAAACACAAAACUUAGUGGUGCAAUAGAUC  
>N3607  
UUUAUUCGUAAUAGCCAGAAAACUGGGAAGCAACCUAGAUAU  
>N3608  
UUAUAUGCCAACAAAGAAAACUGACAAUCAUGGAAUAAUC  
>N3609  
GGUGCAUCCUCAAAGGGGAACUGCUGCUACCUGCCCUGCA  
>N3610  
AUCCUAUCAGAUACCAUGGACUAAGGCUGAUCUCAAUAA  
>N3611  
AGACUGGCUACACAAACAGGACUCAACAUUUUCCUGCUUGC  
>N3612  
AGAGUCAACAAAGAAAGAGAACUUCAUACCAAUUCCCUUA  
>N3613  
GGAGAAAUGAUUACAUUAAAACUGAAUGAUUAUGAAUAAUUC  
>N3614  
AAGAGGUUGCAAAGGUAAAAACUGCCAGUCACAAACAGCAA  
>N3615  
CUUGC UCCAGCCCACAUGAACUGUUGCCAUGGCAGCAAGU  
>N3616  
UUUGGAUGCCUGAUUUAAAGACUUUGCGCCACACUGCGCU  
>N3617  
AGACAGAUCAAACUCACCAAACUCUAGUCUGUACCACACAG  
>N3618  
ACUUUAGUGAUUAAGUAAAAACUAGCUAAUUAUUUCAUAGA  
>N3619  
UUAAAACUCUUUCCUUCUAAAACUCUAUUUAUUCUUCAGACUG  
>N3620  
GAGGAUAAAAGACAGGCUGAACUUCUAUCACAGCAAUGCCC  
>N3621  
GAAUUCUGAUCUUUCCAAGACUUUUUAUCAUGAAUGGAUGU  
>N3622  
CACGUGUUAGGGUGCCCUGGACUGGGCGAAGUGGGCAUUCU  
>N3623  
UAGAUUUGAUACUUAGUGAAACUAUAAAACUUUUCUUUGUA  
>N3624  
UUACCAUGUACACUGAAAGAACUCGUCCCAUAGACAUGGUA  
>N3625  
CCUUGAACUACCUUUACAAAACUUUAAAAGCAUGCUCCCCA  
>N3626  
GAAGGGAGUCUUGAGAAUGAACUGAAGAGAUAGAAAAUAAU  
>N3627  
CAUUCCCUCAUGCUCUGGAAACUCUGGCCCCUGCCUAGUU  
>N3628  
GAAGAGCGCAAGAGCAGAGAACUCAGAUGUCAAUUAAUUCU  
>N3629  
UCUCAUGAUCAUGAUGGAGGACUAUAAGGAGGACAUAAAUA

>N3630  
GAGGCCCAUUGGACACACAAACUUUAUAUGCCCCAGAACAG  
>N3631  
UUUUAAUUUAAAAGAUUAGACUCUUAUGGCUUUGAGUACU  
>N3632  
UGAGUUGUCCUCUUAGAAAACUUGAAAUCAGGUUACAAUG  
>N3633  
AUGGCUCAGUGGUUAAGAGGACUGACUGCUCUCCAAAGGU  
>N3634  
CCACUUUAAAUCAACAAGGAACUUUGC UAAUCUAGAAUAGG  
>N3635  
ACAACUUUAAUAAAUCUUGGACUCUCUGUGAUUAUUGGG  
>N3636  
CUAGUAGAUAGAAAUCUAGAACUUAUAGAUCUAGUAGAUC  
>N3637  
CUAGGCUCAAGAAAGUCAAAAACUGAUACAGGAAAUCACUG  
>N3638  
AUUAGCAGGCUGCUUCAUAAACUCUUUUAGUUUGAUUAAGC  
>N3639  
CCACAUGCUCUCCUACAUAGACUUGUCUCAGUGAUCCCAAG  
>N3640  
GGGACAGCUUAGUCUAAGGAACUGUAGCAUCUGAUUAGCAG  
>N3641  
GGGGUAAAUUUUUUUCCAAAACUGGUGAUCAUGUCAGUCUU  
>N3642  
UAGAGUUUUUACAAACUGAACUAAGUAACA UUGUGAGAG  
>N3643  
GUCACAACAUUAUUAAGCAAACUAAGACAGCCUACCAAGAA  
>N3644  
ACAAAGAACUCAAAAAGUUAGACUUUAGAGAACCAUACAACC  
>N3645  
AACAAAGGACACAUAUAGCAGACUUAUUUGUAAGAGCCAGAA  
>N3646  
AGGAAAUUUUUGGAGGGGAAACUAAGAAAGGGGAUAACGUU  
>N3647  
AAAUGUACUAUAAGAAAUAACUCAGUGAGUCUUAGAGUGG  
>N3648  
AAGUCCUGAAGGUUUGUGGAACUUAGGCACGGUGAAAAACA  
>N3649  
ACUACCCUUGAGUGGUCUAAACUCCCUCAUUUUGAUCUAAG  
>N3650  
AACAAUGAAUUUGAGUGAAGACUUGAAAGCUAAGAGGACAU  
>N3651  
CUUUGAUAAUAUGGGACUAAACUAUACCCAUCUUGGUGCA  
>N3652  
UAGGAUAUUUAGAAUGAAAAACUGGACACAAACUGUGCUCU  
>N3653  
UUGUCAGGACGUCUUUGAAAACUGCAUUCUUCUGCCCAGC

>N3654  
UAAACCUCUCUAUGUGGAGGACUUUUACUUCUCCCAAUUU  
>N3655  
GCUCUUUUGGAGUUCUCUGGACUGUAUCUUGGGUAUUCUGG  
>N3656  
GGGAUUGCUGUGGAGGGAGAACUGGGUUCUGAUGAUAGGCA  
>N3657  
UAAAAUAUGCACAUAUAAAACUAUUUCCUCUAGGCUCACA  
>N3658  
UGUAAGUAUAAAUCUGAUAAACUUAUUGUUAUGCAAUAAA  
>N3659  
AAAAGGAAUUAUACUAAGAGACUGGCUACAUAUUUGGACC  
>N3660  
AGACAAAUUGAAAUGGGGGACUCUGUACUUCAGAUAAAAC  
>N3661  
UAAAGAAUUCAGAAGGUAGACUCCAGAAAUCAAAUAACU  
>N3662  
AAGUGCAUUUAGCCCAGAAACUUAGGAUACCUAAGAUUA  
>N3663  
GAAACUCAAGAAGAACGAAGACUAAAGUGUGGAUACUUUGC  
>N3664  
AGAAGGGGAAAAGUGUCCAAACUUUGGUCUUCAUUCUUCU  
>N3665  
AAUCCCACCAACAAUGGAGGACUAUUUCUCUUUCUCCACAU  
>N3666  
GUAUCAUAUUCAGUAUCAAAACUUAGAAUGAUGCAAAACAA  
>N3667  
CAGCAACUGUAAGCAGCAGAACUAGUAUGUUGCUUAAAUG  
>N3668  
UGAUUACCAGGAGAAAACAGACUCUAGAGUAGUGUAGUAGU  
>N3669  
CCUAAAAAUCCAACUGAGAACUCCUAAACCUGAUAAACAG  
>N3670  
UUUACAAAAAUGCAUGGAAACUAUGAAUAUAGAACCAUGA  
>N3671  
GGGAUCCAUUUGGCAGAAAAACUGAAAACAGAGCUAUUUCA  
>N3672  
AUGUCAGACAUUCCAAUUGAACUGUUGUCAGAUGUUGACUG  
>N3673  
UGAGCAGAUUUUAAGAUAAACUCAUGAACCUUAGAGAACU  
>N3674  
AAAUGAGUACAUUGAAAGAACUUACUGAUGUGGCUGUGUU  
>N3675  
AUAUGUCCAACAAUGGAGAACUAAAACAACUUGAUGCCUC  
>N3676  
CCUACUUGUGUGGACAACAAACUGUUCUCAUUUUGUGCAGA  
>N3677  
AGGCUACUAUACCCAGCCAAACUCUCAAUUAUCAUAGAGGG

>N3678  
AAUAAAAGAAAGAAAUUAAAAGACUUUUUAGAGUUUAAUGAAA  
>N3679  
GACAAAAAGACCACCAACAGACUGGGAAAGGAUCUUUACCU  
>N3680  
GACACAUACUCCAACAAAACUAUACCUCCAAUAGUGCA  
>N3681  
AAAAACUAUCUUAAAAAUAGACUAGAAGACACUAUCAAUUG  
>N3682  
UUAUUCUGCUGUAAAAAGAAACUUUUUUGAUUAACAGUAAG  
>N3683  
UGUGUCCAGUUUUCUGAGGAACUGCCAAACUGAUUCCAGA  
>N3684  
AGUGAUAAAAGUUAAAAAGAACUGUGGCCAAUAUGGGCCUG  
>N3685  
GAGAUUAUAGAUCUAAGAGAACUUAGUACUGCCACUUUGCA  
>N3686  
CAAAGGAGAAAGAGAAACAGACUGUGUAGAAAGAGGCUGAA  
>N3687  
CUACAAAACUCGGGACAGAAACUCCAGGCCAAAACAGGAAG  
>N3688  
UUCUGAAACUUGUUCUUUAGACUGACUUUGAUCUCAAGAU  
>N3689  
GGAAGUGCCAGAAAACGUAGACUAUCUAUAGGGAAGACUCU  
>N3690  
UGGUACGUACCUUCUCCAAAACUAACCAUAUAAUUGGUCAC  
>N3691  
UAAAGAUCUGUAUGAUAGAACUUCAAGUUUCCGAGGAAAG  
>N3692  
UGACAUUCAUUGAGUUUGAAACUUGAAUAAAAAAAAUUAGGG  
>N3693  
UCACACAAUAAUAAUGGGAAACUUCAACACAACACUUUCAC  
>N3694  
UGGAAAGAGAGGCCAAUUGGACUUGCAAACUUUAUAUGCCC  
>N3695  
UUUGUCAGGCUGUGGCAGAGACUCUCAAGAGUCAGCCCUUU  
>N3696  
UUGAAUCUUGGGUAUUCUGAACUAUUGGGCUAAUAUCCACU  
>N3697  
ACGGGGGAUACUAAGUAAGACUUCUUACUCAGGAAGUCAC  
>N3698  
ACACUUUUGCAUCAUCUUGGACUGCUGAGCUUUGGUUCAG  
>N3699  
AGGAAAAGGGCUGGACAAGGACUGAUACAUAGACAAUAGUU  
>N3700  
UAAUGUCUGUUUAGAAAAGACUUUCCUAUCUGAUUAUACU  
>N3701  
CAAUUUCAUUACAAAUAAACUUGAUAAAAUUGCUGUGAA

>N3702  
AACACAACAAAGCCCAGGAACUGAUGGCCUUAGUGCAGAG  
>N3703  
AAUCCUAAAUUUGAUUUGGGACUAAUAUCCAAUAAUACCAA  
>N3704  
ACCCUAUUAUAGGAAUAUGAACUAGCCAGUACCCCCUGAGC  
>N3705  
CACACACAUAGACAUAAACAAACUUGACUCAGUAUAUCACAA  
>N3706  
UGAUGAACACACUAAGUGAAACUGCCAGGGCAAUGUAAAG  
>N3707  
UGUAAAUCAACAUCCAGAGAACUUAUAUUUCGGAUAGCCUG  
>N3708  
ACAGGACAGUGAAUUAGAAAACUUUAUACAAGUCAGCUGAC  
>N3709  
AAUACUGAUCACUGAAAGAAACUCAGGUUCAGGGCCUCUAU  
>N3710  
GCAUCUAAUUUAAUUUGGGACUUGCCUAAGCAUUUAAUUG  
>N3711  
GGUUACUAACCCACAGUCAAAACUUUCUGGCCCAGAACUGUU  
>N3712  
CAUUUUGCUGCUUACAGGAAACUCAUCUCAGAGAAAAGAU  
>N3713  
CAGCCACAUUCACUAAAGAAACUUUAGUAAAGCUCAAAGCA  
>N3714  
GCAACAUCUGAUCCAAAAAAACUCAGAGCAUCUUGUGCCAG  
>N3715  
CCUCUCCAUCUUGGGCACGAACUCAGCAGGCCCUAGAACAC  
>N3716  
AUACACACCCAAAAAGCAAGACUCAGAUUUAAAAUCAUAUC  
>N3717  
ACAUAUAUAAUAAAGAACAAAACUACAAGAAUAGAACCAGUA  
>N3718  
AUAGAUAAGCCCUUAGCCAGACUUUCUAAAGGGCACAAGGA  
>N3719  
UAUCUUCCUACUACAGAGAAACUUAUGUAUUUAUGUUCAUU  
>N3720  
CACCACUGCUGCUCAGAAGAACUGGCCUGGAACUCUCAGGA  
>N3721  
ACAAAAAACAGGUGAAAGAACUGAACAAAACCAUCCAGGA  
>N3722  
GCAGACUCUACCUGUGCAGACUAAAUCCUAAGUUCGCU  
>N3723  
ACAAAUAAGAAACAGAAAGAACUAUACCCAACUCAUUCUAU  
>N3724  
UGACAAAUAUCUCUCUGAAACUGAAACUGGAGCUCAGUAA  
>N3725  
CUGGUAGAGCCACUCAGUAGACUGCUAUAUCAUGCUUCUGU



>N3726  
UAAAAGCCAUAUGGUCCUGGACUUUGACUGAUUGGGAGACU  
>N3727  
GGAGCUGGAAGAACAUAUAGACUUCAGGGGACUAAGUAGGA  
>N3728  
ACAGAGCAAUUGUGAUAAAAACUGCAUGGUACUGGUUAUAGA  
>N3729  
UGAAAAAGAAUGAAUUGUAAACUCCUACCUUGACUAUAGUG  
>N3730  
GAGUGUUUCUGUCUAAAAGAACUCCAGAGACAAAAUUGGA  
>N3731  
AAGUAUCCUUUGAUUCUAGAACUUGC UUUAUUUUUCCAU  
>N3732  
UGAUUUCACUUUGCCAUGAACUCUGACAAGGUGAUUAUUAU  
>N3733  
GUUCUUGUGAGCUCAGCAAAACUAUACUUCUAUCCAAUUUU  
>N3734  
GUAAGCCAGCCUGGCUUUGAACUUGAAAUCCUCCUGUUUCA  
>N3735  
CCUUUAUAUAAUAACAAAAACUUUCUAAAAUAGAUGUGGU  
>N3736  
AAAGAUCCUCAUGGUCUUGAACUCAGUCUGAAUAUAACUU  
>N3737  
GCUAGUGCAGACUGGAAGGGACUUGUGACCCUGGUCAGGCC  
>N3738  
UUAGUGGAAGAACUGAAGAAACUGAAGGGGAUGGCAACCGA  
>N3739  
UCUUUCUCCAGUGAUUACAGACUAUCUCCACAGAGGCUGUC  
>N3740  
CAGAUAGGGUUAACAACUGAACUCCCUCAUUACUAUUAACA  
>N3741  
CUAGUAGGUCUAAGUUGAAAACUGUUUGGUCCUUGUAAACU  
>N3742  
AAUCCCACAGAUCUUUUCAGACUCUCAGUUUCGAUAUUUAU  
>N3743  
CUUAUUAGGGGCUCACAGAGACUGAAGUAGCAAUCAUAAAG  
>N3744  
CCCGUAGACAGAUGCUAUGAACUAAAUGAGAGCCCUUGAAG  
>N3745  
AGGGCCAUCAAGCAGUAGAACUUGGCAGCCUCAGCCACAU  
>N3746  
UGGCUGUGAGUCAGGCUGGAACUCUCAGCUACUUUUUCAGC  
>N3747  
GUCACACAAUCUAAAUGUAAACUGUUAUUCAAUAGUAAGCA  
>N3748  
CUGCACAAGUGAGUGUGGGACUACAGAAGCUAUCAGAUUC  
>N3749  
AAUUCAAUGAUCUCUAGAGAACUUUGAAAUACUCAAAUACU

>N3750  
CCCAAGCAUCUAAAUGUUGAACUAUGAAACUUGUUAUAGGU  
>N3751  
AGAUGGAUUUAAAUUCAAGACUUUCUAUGAUAAAUGACAA  
>N3752  
AAACCCCCCAAAAAAAAAACUUCAUAAGUUGUACAAAGA  
>N3753  
UAAUAUAUUUGGCAAUAUGGACUUGAUUAUAGACCAGAAGU  
>N3754  
AAAAAGACACCUAAGUCUGAACUUAGUUUGUACUUGCAGCA  
>N3755  
CCCUUUUAAUGUUUCAUCAGACUUGCUCUCCACAAAGGCC  
>N3756  
ACUAGCUGCACAACAAGAAAACUACCUGGAAAGACAAGGUA  
>N3757  
UGUGUCCUUCACAACUGGAGACUGAAGCAUGUGACCUACUC  
>N3758  
GAGUUGCUCAAUGAAUCUGGACUCAGCUACCACAGCUUCAG  
>N3759  
UAUGUGCAUAGUUUAAAAAACUGCAGUGAUUAAAUGUUC  
>N3760  
ACUCAUGUGCAAAGAAAGAAACUGUCAAAAGCAAAAAAAAAA  
>N3761  
UCCAGAAAAGACACAGAGAACUGUUGUUUUACUGACAUG  
>N3762  
UUCUUUCCAGAUAAAUUAAAACUCUCGUGUCCUGGGGCCUA  
>N3763  
GAGUCAAGGCUCUGUGAUAAACUUGAAUGAAUCCUCCUUG  
>N3764  
AGCUUCAUUUACAUUGUAAACUUCAAAAACAGUAAGUUA  
>N3765  
AUGUCUGAAUGUACUAGUGGACUCCUAUCUGAGUCCAGAU  
>N3766  
AUUAAACAUCUUUAAAAAAAAACUAAAGCAGAAAGAAAGCCU  
>N3767  
AAUCAGGCUAAAAGGCACAGACUUUCUGUUACAGACUGUUC  
>N3768  
UGCCUUUCAGUUUCCAAAGACUUACGCAGGGAACUUAGGG  
>N3769  
GUUUUGGAGAGACUUUCAAGACUAAUUUAGUAAUUAGGUAA  
>N3770  
UAAUUUUUUUUUUUUUUCAGACUGGGACAUCUGGUCUCUUU  
>N3771  
AAAAAUGCAGGGAGCAAAAACUGAGAAGACAAUGCAAUGC  
>N3772  
GGGACUAUUUAGAUCAUUAAACUGAUCCAGAUUUAACUUUG  
>N3773  
GGAGAAAUACUAUUAGUAGACUUUUCAUGUUACCCAAUGA

>N3774  
AUCAAGAAUUGACAAUUGGGACUUCAUAAAUUGUAAAGCUC  
>N3775  
UAAUAAUUCAAUUGCUUUAAAACUUGUAAGUUUGUGAUUUA  
>N3776  
CAAGUAGGGAUAAAAGCUAAAACUACAGCCAUACAUUUUUUAU  
>N3777  
AGUCAGUUA AUGGUGGAGGAACUUUCCUAUACACCUUAGCU  
>N3778  
UACCACUCUGCCAAAGGGAGACUAUCACAACAUAAGCAUC  
>N3779  
GUCGCCAUUCUUGGUUCCAGGACUCCCUGGAACUUAGGAAUU  
>N3780  
UCCCCAAUAAAAAGACAUAGACUAACAAACUGGCUACACAA  
>N3781  
AAAUGCAAAGGAAGCAAGGACUCUCAUUUUUGUUUCCGU  
>N3782  
UCUUAGCAACCUGAAGUCAGACUUCUAUAAAAACAACAAA  
>N3783  
GGCUUUUAUUUGGUUGGGAGACUUUUAUGACCGAUUCUUU  
>N3784  
AGGCAAAGAGUUUCAUGGAAACUUAGCCUCCUGGAACCUUG  
>N3785  
GGAUAAAAGUAGCCAAUUGAACUUUUUGAUAAUGUCUAAA  
>N3786  
UGUUUCAACACUCAGGUAGGACUCUAGAAAAGAGCAUGAAU  
>N3787  
ACAACAACCCAGGAUUAAGGACUCGCAAUUUAUGCACAUAAG  
>N3788  
GAAAAAAGAGUGGAGCAGAGACUGAAAGAAAGGCCAUCCAG  
>N3789  
UAACCUCUAUGGGAGGAAGAACUCUUGCAGUCAGUGGAUGG  
>N3790  
AGUACAAAAAUGGAGAAGAGACUGAGGAGGUCCAGUGACUG  
>N3791  
GAAA AUGGCAGUACAAUAAAACUCAAAUAUUGAAUAUUUCC  
>N3792  
UUA AUCCC GAUGACCUUGAACUUGAAGAUUUAUCUUCUG  
>N3793  
AGGCUUUUAUACCAGCAAUGAACUGCUCUAUCCUAUGGUUAC  
>N3794  
GUAUUUUUACUUCUUAAAAAACUUUCAUGCUGUUUUCUACA  
>N3795  
UCUUUUUGAUAAAGUGUCAAAACUAGAAUGGUGUAGUAAGAC  
>N3796  
GUGGGGGGAGGGUAUGGGGGACUUUUGGGAUAGCAUUGGAA  
>N3797  
UUUUGAUAGGGGACAGGAAAACUGAAAUGAUGCAAAUACA

>N3798  
CAUUGCUCUCCCCGUGAAGACUGUGUGGAAGCUGGAGUAG  
>N3799  
CAUUUCUCUGAACACUAAGAACUUUGAACAUUUUUUUAGGU  
>N3800  
AUUUCUUUAGGGGAUAUGGGACUGUUUAGAAGGUCAACUUG  
>N3801  
CCUAGUAAUACAUGUGGAAACUGGGGUGUUAAACAACUUU  
>N3802  
UCAUCACUGCAAGGGGGAGGACUAUUAUAUAAUAGGAAAA  
>N3803  
AAACAAAAGCCAUCCAGAGACUGACCCACCUGGAGAUCCA  
>N3804  
UCAGAGCAAUAGUAAUAAAAACUGCAUGGCAUUCGCAUAAA  
>N3805  
ACAGACAGGUUGAACAAUGGACUUGAAUUGAAGAACCAGAA  
>N3806  
UACACUCAUGAAAGUGAAAAACUUCUAUAAGGCAAUGGACA  
>N3807  
GUGAGUACUUGUAUGCAAGAACUCUAUUUUUCCCCAAUUC  
>N3808  
AAAAGAAAAAGAAAAGAAAACUUACCCUGUGAAAGGCUGG  
>N3809  
UUGGUAGAACAUAAGUGAAAAACUAUCCCAAAGUUUAAGAGU  
>N3810  
AUUGAUGUCAAGAUGUUUAAACUUUACAACAGCUAGAGCAU  
>N3811  
AUUCCAAAUAACUGACCAGACUGAAUAUGACUUUUUAAAA  
>N3812  
CUUUUAUAGCUCAGAUUAAAACUUUCUUUAUUUGCUUAUUC  
>N3813  
UCUCUCUUUUGGCUUUCUAAACUAAGGAAAUAUUAAUUC  
>N3814  
ACACAGUUUUUCUGAUGAAACUGGGUAUUUUUUUUAAAA  
>N3815  
UUUAUCAUAACUCUUCAGGACUGGCCCAUGCCCAGGAGU  
>N3816  
UCUAUUAGUUUGAAAUAGAAACUUUUUAUUCAAUUUAUUC  
>N3817  
CCAUAACAAGUUGCAAUAAGACUAGGCACAAACCCACAUAU  
>N3818  
UCAAGAUGUGGGCAUGGCAAACUUUUUAUGCAGGUUUCUCAU  
>N3819  
AGCUUGGUUUUGUUUUUUAAAAACUGCAUGCUGCAAAACUGUA  
>N3820  
UUUUAUCAGUGGUAAUAAAGACUUGUAAAGUUCUUUCCUUA  
>N3821  
AAGGAAAGAAUAGAAGAGAACUGGGCAAGGAAGGAGGAAA

>N3822  
UAAAGUUACUUGGACUUCAAACUGUAGCCAGACAGAUCAAC  
>N3823  
UGGCUUGUUCUGUUAGAAAACUAUAUCUCCAUAUCAAUAG  
>N3824  
AAAGUGCAAUAGUCAUAGAGACUGAUUUUUAAAUAAGAUUUC  
>N3825  
GGAACCAAGGAUGAUCUCAAACUCAUGACCUAUCUGUCUUA  
>N3826  
AUGAGAAACCUAUAGCUGAGACUGAAGCCUCUGGAUUCACC  
>N3827  
ACACACUUUUUAUAUAUGGACUUCUAAAAUCAUUAAAAGU  
>N3828  
CACUGAGAUAGAUCUCUGGACUUGGAGCUAGACCAGUGGC  
>N3829  
AGGCAAGUUCAGGGUUAAAAACUCCCCGAGGAAGCACAGAC  
>N3830  
AACAUUAAAAGAAGGGUAGAACUGGAAAUUACUGGGGGCUU  
>N3831  
GUUGAAUUCUCUGGCUAGGACUUCAAGUACAAUGUUGAAU  
>N3832  
CAUGGAGAUACUCUUCUGGACUUUUCACUUAUUUCCACC  
>N3833  
AGGAAAGUUAUUGGAAAGAAACUUUCCAUAUAGUAGGCAA  
>N3834  
CAGAAGAAUUGGAGGAAGGAACUUGAGCAAGAAUUGGGGAC  
>N3835  
GAUAGGCCAUUGAAACAGAAACUAAACAGAGACACAGUAAA  
>N3836  
CUAAACAGAGACACAGUAAAACUAAUCGAGGUGGUGAACCA  
>N3837  
GAAGGAAAGGCCAUCCAGAGACUGAAUACAGAAAUGUGGU  
>N3838  
AUCUUGUCUCAUAGCAGGAACUGAUUGAGCAUGAAGGUGU  
>N3839  
UCUAAGCAGAGCAUCUCAAACUCCUUUCUCAAUAUUACA  
>N3840  
UUACAUGUCAAUUCAUUAACUAUCCAUGCCUUUUUCCA  
>N3841  
UGUGGCUUCAUUUUCAUUAAACUCUAAAAAGUCUUUAAUUU  
>N3842  
UCUCGAGUCGAGCGGAAGGGACUUGUGCCCAGAUCCAGGCC  
>N3843  
UUCACCAUUGGGGUCCCCAGACUCAGCCCGAUGUUUAACUA  
>N3844  
GUGAGCAAUAAGUGCUGAAAACUGAACCCAAAUCCUCAGGA  
>N3845  
UAAUUAAAUAUAUUAAUAAACUUGAAGUAUAUAUAGCUGC

>N3846  
CCGAUGAAGAAGCUAACGAGACUUGACAAGCAAUGGUGCUC  
>N3847  
CAUUGUUUUUUUAAAAAAAAACUUGUAAACACAUUCUGUAU  
>N3848  
CUGCUUAGGAUUUCACUAAAACUUCAAACUCUAUUUUCAUG  
>N3849  
UGGAACUCAACUCUAGGGGAACUUCCCCUAUUUAGUUGAUU  
>N3850  
GUGGAUGGUCAUUGCGUGGGACUAGGGUGCCAACUAUUCGC  
>N3851  
UAUUUGCACCCAACCAAUGGACUGAAGCAGCUGACCCCUGU  
>N3852  
AACAAAGAAUUAUUCUCUGAAAACUUGUGCUGCACGAUGAUUU  
>N3853  
AUGUAUGGCCCUUUCUGGAGACUGUGUAUGCAGUAAACAGU  
>N3854  
UGAAGCCACAACACACCCCAAACUUUUGGGACACAAUGAAAG  
>N3855  
ACCCAGUUCUUGGCUUCUGAACUUAACAAUUUGUUGAAGAAU  
>N3856  
CAAUUUCACUAAACUCAGGGACUAGAAAAGGCUGCCCACUU  
>N3857  
UGGUGUCUUCUGGGAAGCAGACUAGCUAGCAGUCUUUCCCA  
>N3858  
AUGCCCAAUAGCAGAGAAAAACUUAUAUGAAUACUAUUUCU  
>N3859  
AGGGGACUUUCAGAGAGGAAACUAGGAAAGGUGAUAGCAUU  
>N3860  
UCGUGUCUGGCGUGCUCAGAACUUCUCCUCAUAAACUUUUC  
>N3861  
GGAGUCUCCUUGGCUCAGGACUCCACAGAGGGCAGGCUGC  
>N3862  
AGUAGCUGGAUAUAAAAUAAACUCAAAACAAGUCAUUGGCCU  
>N3863  
AUAUCCAACAUAUAUAAAGAACUCAAGAAGGUGGACUUCAG  
>N3864  
AUGUAGCUGUCUCUUGUGAGACUAUGCCGGGGCCUAGCAA  
>N3865  
UAAAAAUGCAGAAGCAGGAGACUCCAGGGCCAAUCUGAGCU  
>N3866  
CAUAACAGUAACUCCUAGGAACUGUUCUUCAGAUACAAAA  
>N3867  
AUAGGUUUUAAGACUAAAGAACUCAGAUUCAGAAAGCUAGC  
>N3868  
UGACAUUUGAAAUUCUGGGAACUUUCCAAAGGAUAUACAAA  
>N3869  
UAUUUAUAGAAAAUAUUGGGGACUGUUCAGGUGGUCAGCUGU

>N3870  
AAAGUUACCAAUACUAUGGACUGGACAUUUUAAAUGUAUA  
>N3871  
AGGAGGUUAACAAUGUCAGAACUUGCCUGCACUGGGUUGGC  
>N3872  
GAGAAUGCACUGUGAUACAAACUCUCUGGAGAGUCAGGAAA  
>N3873  
GUUGGAAUCGAUUAAGAGGAACUAGGUAGGUAGGUGAAGUU  
>N3874  
GAAGUUAGACUUUAAUGAAGACUUUUAGCCAGUCUGUGCAG  
>N3875  
UGGAAAUGAAACUAUUCAGACUCGCGGCCAGAUAGCGCUU  
>N3876  
AAAGAUAUUGCCCUUCCAGACUUUGAAAAUAAUGUAAG  
>N3877  
UCCCUUAUUUGGGCAAGAAAACUCUGUUCUCCAUCCCUU  
>N3878  
UCAUGUAAAAUAAACCCCAAACUCCCAUGGCUACCCAGGAU  
>N3879  
UCAUCCAUCCAAAACAAGGGACUAUAGGUAAUAAAAGGUCA  
>N3880  
AUCUGUAAAUGUUUUAUAAAACUUAUUGUGCAUAAUGGAUU  
>N3881  
CCUGACAGCAGGGAAAGGGAACUUAUAAAGCCUACCUCAG  
>N3882  
AUCAAAUAAGUAGAGAGAAACUGAAAGUAAUACACUAAA  
>N3883  
CAUUUCCUAAACACAUGAAACUCAAGAAAAUAGAAGACUG  
>N3884  
AAAGGAUGGGCCAUGUAGAGACUGCCAUAUCCAGGGAUCCA  
>N3885  
UAGGUGGAACAACAUUAUGAACUAACCAGUACCCUGGAGCU  
>N3886  
CGCUGAUAAUCGGCUGCUGAACUUCUGAAAGCUAAUUGUU  
>N3887  
UCCUCUCUCCUGGAUGAAAACUUCUUUUUAUGAUUACUGG  
>N3888  
CUCCUACGUUUAGGCAGCAGACUCAGAUUAAGUUCCAUA  
>N3889  
GGUAGUCCAGAUUACCACAGACUAAUAAGUACUGUUUGAAU  
>N3890  
CUUUUCAGCAACACACAAGGACUGAGACAGGGGGUCUAUAA  
>N3891  
UACAGAUGAGAUUUGAUUGAACUCCAUGGCAUAGAUUCAA  
>N3892  
UGGGGGUUUUCAGAGGGGAAACUAGGAAAAGGAUAACAUU  
>N3893  
UACAGCACAGAUGAACUGAACUGUGAAGUUUAUAGACUAAG

>N3894  
ACACUUCUCACUAUCAGGGACUAUGGGUGAGUCUUUUCAC  
>N3895  
ACAUGAAACCCAACGUGCAGACUGGACCAUUGCCUCUACGC  
>N3896  
ACAAUAGACUCUGGCACAAACUAUAUGGAGGGGUUCUAG  
>N3897  
ACAUAUGCAACAUUCCAAACUGCCCUGUAUUUCCAACC  
>N3898  
GGUGUGUUAUAGUUUAGGGACUCUAUUGACCUGAGUGAUC  
>N3899  
CUUUAACAUAAGAAAUAACUUAUUCAGUUCGUCACAU  
>N3900  
GAAUUGUAAAGACUGUGGGACUUUAAAGUUAUUUAGAUC  
>N3901  
AAAUGUGGUUAGGGUUAUAAACUCACAUAUCCUUUGUCUAU  
>N3902  
UCCUGCUUUUUCUUUGAGGACUUUAGCUCUGGUGCCUUC  
>N3903  
GCCAUUCCCCAGCUCUAAAACUUUUGUUUAAAUAUGUAA  
>N3904  
CUCAGAGCCGAGCAGGAAGACUGUCCUGUGUUCUAGGCCA  
>N3905  
UCAACACAUUUGAUUAAUAAACUAUACAAUCAUUAAGCCUG  
>N3906  
AUCUAGCCAAGAGGUUAUUGAACUCUCAGAACCCAUGAGCCA  
>N3907  
GCCACACUGUCUAAACAUAACUGGCCAGUGGGCCUUCUG  
>N3908  
AAUGCCUUAAGCUUGC UAAAACUAGUUUAUAAAUGAUAGCUU  
>N3909  
GCAGUGUCUUUGUAUUUAAAACUGAUUCAUCAGCAGGAGUG  
>N3910  
GUGAUCUUGAGGUAACCUAAACUAUUCAUACUGGAAGAAAA  
>N3911  
ACGCCACUGUCCAGCCAGAAACUCUUAAAUAACAAGUAAAA  
>N3912  
CACCUUUGCUCUCACGAAAACUUGUGAUAGCAAUACUGU  
>N3913  
AAAUGUCUUCUUUCAAAGACUAUGAGAUGAAGUGAACAG  
>N3914  
UCUCAGGGUUAGGCCUAUGGACUGUUGACCUUCACUCAUAG  
>N3915  
GAAGUUCUUGAUCCAUAUUGGACUUGAGCUUUGCACAAGAAG  
>N3916  
AAGGCAUACAUCUGUGAAACUAGAACUGCAGAUGGUCAC  
>N3917  
GCCUACAGAACUCCAAUAGACUGGACCAGAAAAGAAAUUC



>N3918  
AUAAGUGGUUACAGGCUGGACUGGCACACAGCAUGUACAU  
>N3919  
GCAACAAAGCUAAAUAGAAAACUGUAACUCAGCUGCUCCAU  
>N3920  
GGGUAUGUAUCACAACUGAAACUAGAGUGAAAAUUAUCAGA  
>N3921  
UCAUAGUAAACAGCUAGAAAACUAAUUUCCAAGCAAUGGU  
>N3922  
AAAAAAUUCUACCAAGACAAACUCAAUUUUAAAACAUCAUG  
>N3923  
ACCCUUCACAACAGUCACAAACUAAUAAAACACCUUGGUA  
>N3924  
UAUGACUGC UUUCUUCAGAGACUUGAAGUUCUUAUCAUACA  
>N3925  
UAGUGAAUUAUUUGAAUUAUAAACUAUCAAAAGGGUUGCCAG  
>N3926  
UCAAGAAUCUUGCCAACAAACUAGUCUAAUUGUUGUUAUA  
>N3927  
GACUCCAGGAGCUCCCAAGGACUGAACCACCAACCAAAGAA  
>N3928  
GAAUAAUGUUAAACACUAAAAACUCAUGGAGCUUCUGAACAU  
>N3929  
GUAGACCAGGCUGGCCUCGAAACUCAGAGAUCCACCUGCCUC  
>N3930  
AAUAAUUAAAACAUUCCUAAACUUACUUUCUACAGAAACA  
>N3931  
UACAAGGAAUGAUUCUAGGGACUUGCAAUCUCCCGGAUGCA  
>N3932  
UAUCAGAUUGAAAAUGAUAAACUUUUUAGUCAAGGGAGGAA  
>N3933  
AAAGCUGCAAGCACAUGGAGACUGACAGAAGGUAAAUUGCU  
>N3934  
UAAACGAAUGAAAGCAGAGAACUGACUUAAGUAUGGAAAU  
>N3935  
AAAAAACAGGAGUGAGCAGACUGGCAGAAGUGACAGAGCUU  
>N3936  
AUAGGCUCCAACUCUUUAAAACUCUAAGACUUGAGCAAACU  
>N3937  
CAGAGAGAACACUUUUCUAGACUCUUACUUUCCUAAGGAAU  
>N3938  
UUGUAAGUAUCCAAGAAAGACUAAUUUCUUUUAAGUAAAGG  
>N3939  
UGAGCAGUUUCUGAUAAAAGACUGUGUGUUUAUGUAUCCU  
>N3940  
CAAUGAAGUAACACUAAAGACUCAUUAUAAGAUAAUUU  
>N3941  
UUAAUUAUUCCAUGAAUUGAACUAAAUACAUACCACAUUCA

>N3942  
GCUUUGGAGGAAUGUAGAAGACUUUGGAACUUUGGCUAGAA  
>N3943  
UGAGUAUUUUUACGAUAGAAAACUGUACCUGGCAAUAAAGA  
>N3944  
AGCUAUUGUACAGAGGGAAAACUGUCACAAUGGUCGACUUU  
>N3945  
CAGAACAAACUUCGAGAAAGACUGUUGGGAGGACAGGAUGG  
>N3946  
GCUAUAUUGGAGUUCUCAGACUGGUUAAUUUAUCAAGAAC  
>N3947  
UGUCUUAUUUGACUCACAAGACUGGACAAGGAUUAUUCUUGA  
>N3948  
AACAGACAGGUUUUGUGGAAACUGAAGGAGAAGUAGCAGUU  
>N3949  
GAAAAGCUGUGUUGAGGAGACUGAAAGAGAAUUCUGGAAA  
>N3950  
CCUGGAAGGAGCCUAGUGAGACUGUCUGUAAGCCAAUGAAA  
>N3951  
AAGCAACAGAAUUAACCAGACUUUGCAUUCUAUCAUAUCU  
>N3952  
AAGGGAUUUGUGAUGUUGGGACUUGGGGGAGGGUAUGGCCA  
>N3953  
AGCAGACAGAGUCCUGUAGGACUUUAUCUUAACAAUAAAGC  
>N3954  
UCAGCUGUGAUUAAGCAGAAAACUAGUAAUAUUGAAAUGAAA  
>N3955  
ACUUUGGAUUAUUUCUAAGAGACUUUGAACUUCUAAAGUGUU  
>N3956  
AAUCCCACAGCAAACAGCAAACUAAAUAAGACAAACUCAG  
>N3957  
AAAGAAGGUUACAGAAGUAAACUUGUCAAGACGAUAUUCAC  
>N3958  
UUGAUCUUGUGACUCCUGAGACUCCUCCUGAUUCAAGUCUU  
>N3959  
CUAAAAGCUACAAUAAUAAAACUAACUCAUAAGAGAAAAGU  
>N3960  
AGCAUAAAAGAUUCAGCAGAACUAAAAGUUCUACCCUGAAA  
>N3961  
UAAUGUGGGCGACUGUCUAAACUUGGUUCCCAAGGCAUAGU  
>N3962  
CCUUGCGGGUGUUGGGCAAGACUCUGCUGUCAAGGUAGCCC  
>N3963  
AGCUCCCAGGGCAGGUGGAAACUGGAAGGAUCCUGACGAUA  
>N3964  
CAGGGGCUGAGAAUAACUGGACUUGCCCCUCACUGUAUGCU  
>N3965  
UGAGGCUUGAGGGCAGGUAAACUGGAUCUGAGGGCAUGAGA

>N3966  
GUGCCAACCUAGUGGGCUGGGACUGUCAUCCUGCUGGAGAGC  
>N3967  
AUUGCACCUGGGCAUUUUAGACUUUUCACCUGGCUCCUGUG  
>N3968  
UAAUGGAUGAUUAGUCUGAACUGGCCAUUUUGGUAUCCA  
>N3969  
AGCUUGUAUAAAACCUGAAAACUAUCUUCUCAAUAUAUUU  
>N3970  
CAUGGGAACUAUAAGGGUAAACUAUUUCAUUACUGUGUAGG  
>N3971  
CAACAAAUAUAGAAGAAAACUUCCAAACAUAAGAAAG  
>N3972  
AAAGUGAUUUCAGUCUAAAACUAAAAAUACAAUAUGGUA  
>N3973  
GUAGCGCUGAUUGUCCUGGAACUCACUCUGUAGAUCAGGCU  
>N3974  
AGAUGAGUGAGUGUGCCCAAACUUCUCUACAAAUAUACAG  
>N3975  
CACCCCACCUGACUUCUAAACUCCCUGGGACCUCCAAUCU  
>N3976  
GGUUAAGACUGAAAUGGAAAACUGCACAAUAUAAUACCCAA  
>N3977  
AACAUUAGUAUUAUAAACAAACUGAACAUCCUAAUCUAAA  
>N3978  
GUUUUCUUCUCUGUCCACAAACUCUGAGUUCAAAGUUAUU  
>N3979  
UUGUCCUCUAGUGAGGACAGACUGAACAAUUAUUCUAAU  
>N3980  
CUAGCCCAAACCAUUUUCAAACUCUUAAAUAUAGUUCUGUUC  
>N3981  
CUCUUAAAAGAAAGACUCAGAACUGCCACCGUUAGGAAGCAA  
>N3982  
CAGCCAGCUUGUAAUAGAAAACUCCAGGACCAGACACAGAU  
>N3983  
AAGUUCUUUACUAGGACAAAACUGGAUGAUUAACUGUUGGG  
>N3984  
UGGGGAGCAUGUGUGGGGAAACUACUGAGUCAGAAUCCUUU  
>N3985  
UUGUGCACAAGAGACCUAGAACUGAAGGAGCUUGGCAAAGC  
>N3986  
UAUCCAAAGAAACUUUGAAAACUCACAUCAUAGCAUUUUAA  
>N3987  
AUGUACGUGACCAGAGGUAAACUGGCUAGGCAGAAGCCCAG  
>N3988  
UCUUUCAUAGCUGAGGAUAAACUAAAUGGUUCCCUAUGGU  
>N3989  
AAAACACAAAUCAACUCAGAACUACAGGACUCCACCAACAU

>N3990  
GUGUUAGCACUGAUGACAAAACUUUUUCCUUUUCUUACUAUG  
>N3991  
UAACCAGGAAUGAAUAUGAAACUUGCGAGUGGGUCCAACC  
>N3992  
GUACUGUGAUCUUCAGACAACUCCUGAUACCAACAAGUAA  
>N3993  
AAGCUUCCAGAGCUGUGAACUUUGAUGAAUCAGGUCUUU  
>N3994  
AAAGUAUUGUCUAGGACAGAACUUUAAAUAACCUCCAUC  
>N3995  
ACAGUAAAUCUGGAGGAAACUACAUUUCACUCAGUUUGG  
>N3996  
GAGAUUCAGUUUCACAGGGACUUAAAUCUGAUUAGCACCA  
>N3997  
UUUCAUGUAAAUCAUACGAAACUGAAAAAUUGCAGUGUGUG  
>N3998  
ACAUACCUAUUCAAUAAUAAACUCUGAACAUUGGUCACAAGC  
>N3999  
CUUUCAGGAAUUUGUUUAAACUAUCUUCAGAUCAAUUUU  
>N4000  
GCCAUUAGGAAUAAACUGGGACUGUCCAGAGAGAAAGGAC  
>N4001  
UAUUGUACUAUUAUUAUUAGACUACAGCAAGUUUUUAUUUU  
>N4002  
UGCCAGUAGCACAUAUGAACUCCAAGUCAUGAAAUCAAU  
>N4003  
GUGGUAGAAGAUAAAGGAAGACUUUGUUGAAAAUUAUGGC  
>N4004  
AAAAAUGAACAGUUAAGAAGACUUUCAUACACCUGGUUCUG  
>N4005  
GCCUUUACAGAUUUGCAAAGACUAUUAUGAAUCUUUUUUUAU  
>N4006  
UUGGAAUAGAAGCCUGAAAAACUGAAGACCUAACCUGGUUC  
>N4007  
ACUGAGACUUAGAUAAGUAAACUUUUUAUUUAUACAGCAAC  
>N4008  
CAUUGUUGUUGGAAUGUAAACUGCUAUAACUACUAUGGAA  
>N4009  
UCAUCUGUAAAGAAAGUGAAACUACAAAAGCUUCAGGAAAA  
>N4010  
UAGUUAACCCAGGUCUAAAGACUCACUCCUCACUGUGGAUU  
>N4011  
GGGAAGGAAAGGGACAUAGACUUGAAGAAGGGGAUAGAGA  
>N4012  
AAACAGGAUAAUAUACAAAAACUUCAAGUGGUUCCUGUGA  
>N4013  
AAAGGAUGGACUAUUCAGAGACUACCCCACCCAGGGAUCCA

>N4014  
CUAGGAAAUGGAGUUUCAAAACUCAGGACAGUCUUACUCCA  
>N4015  
CAGAAUCAGAGGAUUGCAGGACUUUGGACACACCAGGAUCU  
>N4016  
AGACAGUAGGAAAUAUCAAAACUCAGGGCUAAAAUCAACCA  
>N4017  
UACAAUGAGAAUAGGACAAGACUAGAAAGAUAGAAAAGCA  
>N4018  
UUCUUUGCCUAGUUUCUGAACUAUCAAAUAGAAACAGUGU  
>N4019  
UGCUCACAGCCACACAUCAGACUGAGCACAGGAACCCCAAU  
>N4020  
GGGUUCUCUAGAGUCACAGAACUUACAGAAUGUCUCUCUAU  
>N4021  
GUAAAACUCAAGGGGGGAGAACUGGGCAGGGAAAGUACAAG  
>N4022  
CCUCCCUCUUUCUUUUUAAACUUUCUAUUUCAUUAAGCCC  
>N4023  
GCACGUGUUGGGUGCUCAAAACUGAAGCUUAAAGGGCACCU  
>N4024  
GACAAAGAAUAGAGUAUCAAAACUUGAUAAAUUUUGCAUGGU  
>N4025  
AAGCUCAGGGCUUGAUGGGGACUUACAGAGAUAGGACUGGU  
>N4026  
GACAGGUUGAAGGGACCAAGACUGGC AAAUUAACAUGAACU  
>N4027  
GAUUAUCCUGCUUGUAAUAAACUCUUAUUUUAAAAUAGUUA  
>N4028  
GCUAGGUUCCCAUGAUUGGGACUUUACUGGAUCAUAUCCCU  
>N4029  
GACUUAACAACAAGCUAGACUUCUGUUACUUUCCUUGUU  
>N4030  
CAGAUGGAGACAUCAUAUAAACUCAAAUAUGCCUGGGUAAA  
>N4031  
CAUAUUCACACAGUUCCCAAACUCAAUCCCCCUUCCUCUCC  
>N4032  
CCAAUCGCGCGGAACCUAGAGACUGCGGUACAUAGGGAAGCA  
>N4033  
CCCGCAAGGGCCACACGGGACUCCCCACGGGAUCCUAAGA  
>N4034  
UCCUCCAUCUCAGCUCCAAACUUUGUCUCUAUAAACCCUU  
>N4035  
UCUCAUGAUGACGACAGAGGACUUUAAGAAGGACAAAUA  
>N4036  
AAACCAGUAGCCAACAUCAAAACUAAAUGGAGAGAAGUGGUG  
>N4037  
UGUACUCUUUCUGCAGCGGGACUUGGUAAAGUGUAAGGGUC

>N4038  
GUGGAACCCACAGUUAAGAGACUUUUAAUUGUAAAAAGACU  
>N4039  
AAAAAGUGAUAAACAGAAAGAACUCCUGCCCAGUGCAAUUGG  
>N4040  
GCAAGCAUUCGGUUAUGGAACUCCUCUGGACCCUCAGCAA  
>N4041  
UCCACACAGUGGCUUUUAAACUUGUUUAGCACAAGAAU  
>N4042  
UUAUUCUUUAUGCUGACCAGACUCUUUUAAGUAAAUAUCA  
>N4043  
UGAGCUACAGCAAAAAUAAAACUACAAUGGCUGAAUUACUG  
>N4044  
GAGGUCCUAUGGAACCAAGAACUAAGAGUGUGAUAGUCUG  
>N4045  
UACUCAGCGAAUUGCACUGGACUGGCACGUUGUCAGUCCUGC  
>N4046  
GUAGGCAGGCGAUGAUGAGAACUCUGCGUGGCUGGUGAGGA  
>N4047  
AUGGUUUAUGGCCUUGCUGAACUCUGGGGUACCGUUUCCU  
>N4048  
ACGUUUUUUGUAGAAAUAAAACUUGUUAGCAUUGUACUGA  
>N4049  
CUUUAAAUGUAUAAUUCAGACUGGUGAGAUGACUCAGCAG  
>N4050  
AACAAUGCUCUCUGCAUGGACUGUGGCAGGUUAUACACA  
>N4051  
CAAGGGAUGAACAGUAAAAAACUCACAGAGGUUAGAGUUCA  
>N4052  
AUUUCUCUUAAGAUCAAUGGACUCAAUUUCUCACUAAAAAG  
>N4053  
CAAUCCUGUAAUUUAAAAGGACUUCCCAAGGUAUCACCAUU  
>N4054  
CCAUUUCUGGUGAAUUGAAAACUUAUACAGCCAUUUUAGAA  
>N4055  
AUAGAGUUUUCAGAUUCUGGACUUCUUUAGAGUUAAGAGUG  
>N4056  
GGUUCUGGAUUCCAUCAAGACUGGUCUGUGCAGGGGAGAG  
>N4057  
UGGACUAGGAAAAAACAGACUAGUCUGGAGCAUCCUUUG  
>N4058  
AGCUGGCAUCUUGAUCUUGGACUCCUGGCCUCCAAAACCA  
>N4059  
CGUAUCUCAAACCCUAAAAACUUGUCUUCAGUGAGGCUGC  
>N4060  
AAAUGCCACUCUACCCAAAACUCCGCAGUGGGCCUAACAA  
>N4061  
GCAGCUAGCAGGAUGCUIAAAACUAGCUUGGAAGCAUGCUGG

>N4062  
AUUAAAAAUGGGGCUCAGAAACUGAACAAAGAAUUCUCACC  
>N4063  
UCUACCAGAGAACUCCUAAAACUGAUAAACAACUUCAGUGA  
>N4064  
AAAGGAAACAGGGAGAGAGAACUGAGAAAGAGCAGUGAAAU  
>N4065  
AGAACCCAUUACAAAGGAGAACUGUCAGCAGCUGGGUGAGC  
>N4066  
GGAGACUUGGUCUGUGAAAAACUCACACCAUAGUAUGUGAU  
>N4067  
UAGUGUCCAAAUUCUCCAAAACUAAUCAAUGAUUAAUUA  
>N4068  
GUUAGAGGCUAGAGCCAUAACUUGGGAAUGCUCCCAUUUC  
>N4069  
AAAAGAUUAAUGUAGUUUGAACUUUUAUAGAGGAAUAUCAU  
>N4070  
CAUGUGUACAAGUAAAUAAGACUUA AAAAUGUAAAGCAUUU  
>N4071  
ACUCAGCUAUGCCUCACUGGACUUCUGGCCUACUUCUGAUC  
>N4072  
GAGGACAAUAACUUUGGGACUCUAACACUAGUAUUUAAG  
>N4073  
UGACACAGAACCCUUCACAAACUCGGGAGCCAAAGAUGGUU  
>N4074  
UACAUGGCCAGUAACCAUGAACUUAUAGGCAGACAGAAGAU  
>N4075  
GGGAGCCUCCAUGGGUCUGAACUGGUUACUCUGCAUAUAUU  
>N4076  
UUGUACAUCCAGACAGGUAGACUUAUAGUGACUAAUGCUAGC  
>N4077  
GAUGAAGUAAAUCAUAAGAACUAAAACCAGGUGAUUCCAA  
>N4078  
AAGGCAGACACCACACAUGAACUGGCAUCUAUAGUUCAGUA  
>N4079  
AACCAGGGCUACAUUGUGAGACUGUCUAAAAUAAUUUAUU  
>N4080  
GAAUGAAAAAGAAAAGUGGACUUAUACUAGCCACAUAUGGC  
>N4081  
UAUAAUUGACACAUAUAGGACUAAUUUGCCAUCCCCUGAGG  
>N4082  
UAUUUAUUUAUUUAUUUAAAACUCCAGAUUUUAUCCCCUC  
>N4083  
CUUGCAACUAUAGAACUAAGACUAUGUGCCAUAUAUAUGU  
>N4084  
CAGAAAGGCUAAGAUCAAAAACUCAGGUGACAGCAGAUGCU  
>N4085  
GGACAUUGAAGCAUUUCAAAAACUUGAAUUUUUAGUUCAAGG

>N4086  
ACACCACUAGUUUUCAGGAGACUAUAAAUCAAAACCAUUA  
>N4087  
AUGUGGUUGCUAGGAAUUGAACUCAGAACCUUCAGAAGAGC  
>N4088  
UGAGUUCUAGGACAGCCAGGACUACACAGAGAAACCCUGUC  
>N4089  
AGGGGUUCAGGUCCCUAAAAACUGGCAUUUUGGAUACUUGU  
>N4090  
UACUGCAAGUCUAGUCUGGGACUACAUAGUGAGUUCUAGGU  
>N4091  
UGUUUACUUACACAGUGCAGACUGGCCUCAGACUCACUGCG  
>N4092  
CAAUGAAUAAACUGGGAAAACUGGGAGUAGCAGCAAUUCU  
>N4093  
AUCUGGCUGAGUAAGUGAAGACUUGCCCAAUAUUCUAAUAA  
>N4094  
CCACAUCAAGGAAGGAGAGAACUGAUUCCACAGCCUUGUCC  
>N4095  
UGGGUAUGUCUGCCCUCAAACUGUCUCUCCAUCAUCAAC  
>N4096  
UGGGAGACCCAUCCAGUUAAACUAAGUAAAUAAAAGCUAUC  
>N4097  
CACUAAUGAGACACAUAAAACUUCAGCUUUGAGGAAGGCA  
>N4098  
CUGGGUGAGGUAAACAUAGAACUUUUCUACCCCUUGGCAC  
>N4099  
CGCAGUUUGCGUGUAGCCAGACUACAGAAACUUUGAGAUCU  
>N4100  
GGGUUAGGGUCACCAUCAGAACUGUCUGGGGGGAGAUGUAC  
>N4101  
UGCUGUAUGUAAUUGAGUGGACUCUGACUUUCACCCUCU  
>N4102  
UCUACUUUUCACUGUAAAACUUAGUUUGUUUGGAAUCC  
>N4103  
AGUUUCAGCUUUUCUAGAAAACUGGGCAAACAUUUGAGUGG  
>N4104  
UGCUGGGUGUUCUCCCAAGACUAAUGCUGUCAGUUCUUUC  
>N4105  
UUUAUUUAGUCUGACUCAAACUCCUGGCAAUCCUGCUAUC  
>N4106  
GAGACUCCGAGCGAGCAUGGACUUGGAAGCAACAUCAAGC  
>N4107  
AAGAAGCAAGCACUCAAUAAACUUAUAAAGUAUAUAUUAUA  
>N4108  
ACAAUACAACAAACACAGAACUCCUUUCUACAGAGGAGGG  
>N4109  
AUGAUCUCAAUAGCAAGGAACUGAUUCAUAAAGCAUGCCU



>N4110  
UGUGAGGAUUAUGUCAUGAAACUAGGUUAGACUAUUAGGGU  
>N4111  
GAAAAACCAUUCAAAUCUAAACUAUUUUCUCAACACCAUAU  
>N4112  
UAGCUGGGUCUUGAGGUAGAACUAUUUCCAGUUUUCUGAGA  
>N4113  
GCCACAACAAUCCACUCAGACUACUCUUUCUGCUCACUC  
>N4114  
UUAUCCUGAGGCAAUUUAAACUACUGUAAAGUUGUAGUGA  
>N4115  
UAUCCCCAGCACCACAUAAAACUAGGCAUGGUGAUACACAC  
>N4116  
GGUAACAUCAAUGUCAGAAAACUUUGUAGAAACCCUCUGCU  
>N4117  
GGCUGACAAUGCUCUCCCCAAACUCCAUAACUAGCAGAUAC  
>N4118  
GACACUGAUCAGGACCUCAAAACUCCAUUUUUAAGUUUCUU  
>N4119  
UCCUCACUGUUGUACGCUGGACUGAUUCCCAAUGUCAGAG  
>N4120  
GGUACUAUGACAGGACAGAAACUGGACAGAAAGCCAAAACA  
>N4121  
GCUAGUGAUUGAUUCCAAAGACUUUAUCUAGCAGGCACGAA  
>N4122  
CCCACCCAAAUACCAAUAAACUGUGACCUCUGUUCAGCUC  
>N4123  
CUGUUGUUUCUCCAUUUCAGACUGGGCCUAUGACAGGUGGC  
>N4124  
UCUGUAGUUUGAGAAAGUAGACUGGAAUCACCAUUUUUAUU  
>N4125  
GUAGAUCAGGCAUGUCUGGAACUCACAAAGUUUUGCCUCC  
>N4126  
AAUACAAUAAACUAAAGCUGGACUAGUGAACAUCAAAGGUGU  
>N4127  
AAGUGAUUUCUUCAUAUGGACUAAAAGGUCUUCUCUGUGU  
>N4128  
CUGCACACUCACCUUUGCAGACUAGUCUCGGAGGGUUAAGC  
>N4129  
CUGAAGGCUGCUAUGAGGAAACUACAAUUCUAGGCAGCUAG  
>N4130  
GGGAAAUCUACCAAGAUGAACUCUCAAUUCUGAACAUUA  
>N4131  
AAAGCAGUGCUAAGAGGAAAACUCAUAGCUCUGAGAACCUC  
>N4132  
UUACAGAAAUUGGUACAAGGACUAUGUGGAAUUGCUGUGAU  
>N4133  
AUAAACCCAAUGUCUUCUGGACUAACCGCCAGCAUUCACGC

>N4134  
AUGUGGGUGCUGGAAAUUGAACUUUGGUCCUUUAAAAGAUC  
>N4135  
UUCCCUGGAAUCAAGAGCAAACUAUUUAGCUGUACUUUAUG  
>N4136  
CUUUAAAUCUGAGUGCUUGGACUGUCAAUCCUGGAGUUACU  
>N4137  
CAUUACAUCCUGCUCCUAGAACUCAGUAGGUCAGCAUGUAA  
>N4138  
GGGCUUUGUGAAGCUGCUGGACUCCACAGAGAGAAAUGAAC  
>N4139  
UACUACUUCUACCAAACUGGACUGCUGAAGUGUUUGCAAGU  
>N4140  
UUUAGUAAUUACAUCCAAAACUAUGAUUGGUGGUAGGGUG  
>N4141  
GUUUUCUCACUCACCUGGAGACUGAUUCCAAUAGAUUUCUU  
>N4142  
AUA AUGGACUAAACUUGUAAACUGAAACCCAACCUCAAGUA  
>N4143  
CUGUGGUCUCUUGACUAAGGACUGCCCGGAUAACUGGGAAU  
>N4144  
UGUUAUCUUAUCUCAAGAACUAGCUCUUAUAGUUAUGUU  
>N4145  
UGCUAAGCCUGAUAAACUCAAACUCAGUACCUGUGUCCAAA  
>N4146  
AGAAGAUCUUCGGGAGGUAGACUGCUGUAACCCAGCUGAAC  
>N4147  
AUGAACAAAACCAUACUAGAACUAAAAGGGGAAGUAGACAC  
>N4148  
GAUAGAGGGAGAAAGAGAGGACUAACUGAUUUAAACAGACA  
>N4149  
GUUUCUUAUUUUAAAUUUGGACUUCUAACUACCUCUUAUU  
>N4150  
CUAGCACGUUUGAGCACAAACUCUAUGUAAGGAAUACUUC  
>N4151  
CAAUAUAAUUCUUCACAGAAACUGUACGACAAUUUUAAACU  
>N4152  
CUGUGACCGUAUGUUCAGGAACUGCACAGGUUUGUUACCAU  
>N4153  
UAAUGAAUAACUUGAAAUGAACUCACCCUGUCUACUACAC  
>N4154  
CUUUGGAAUAAUAAGGCUGGACUUGUUUACACAACUAGAUG  
>N4155  
AUAAAGCAAUAGUGCUAAAACUCACACUAAAUAUCA AUG  
>N4156  
UUCCCUAAA AUACUGCAAAACUUGCAGUUUGACAAGUGGU  
>N4157  
UUUGCAGAACUGAGAGUUGAACUCAGAGUCUCAAAACAUACA

>N4158  
AUGGAGGGUCAACUGGAGAGACUGGUCAUGGCUGCUGAGUU  
>N4159  
ACUGACAUGAAUCCAAAGGGACUAUUUUGUGAGCAACAAUG  
>N4160  
UGGUGAUGAGUGUCAGUGGGACUGCUUCCAGGAGAUUAC  
>N4161  
CCCUUCCAACUAAUUCAAGAACUUGAGUGUCUAGGGUUUU  
>N4162  
AGGGCAUUGGAUCUCUUGGAACUCAAUUUAUAGGUGGUUAU  
>N4163  
AAAGGAUUUGAAGAAGAGAGACUGAAAGUUUUUGAGUGUGA  
>N4164  
GUCUUGCAUGCAGCUCAGGAACUGAGACACAGAGCCCUGUG  
>N4165  
AUAUCAGCGGCCUACCAAGAACUUCCAACCGUAGGUCUCUU  
>N4166  
CUGAAGGUAAUGUUGGGUGAACUGUUGAUCUCAGAAUACUC  
>N4167  
GAAAAACUUAUUUCAAGGAACUUAAGAGAUAGCUUACAUG  
>N4168  
UUUAUCCUCAAAGAUACUGAACUGACCUGCUGUUCAGCCUC  
>N4169  
UUCAGAUGGAUCCAGUCAGAACUUCAGUCAAGCCCUGAGCC  
>N4170  
UUUUCUGCUUCUAAGAAGAACUGAAGAAUCCACACUUUGG  
>N4171  
ACCUGUGAUACUGGAUAGGAACUCAAAUAGUAGACAAAACU  
>N4172  
UAACUAAACACAAUAGUCAGACUUGCCACAAAUGUCAUAAG  
>N4173  
GGGCAUCGCGUAGACUAGGGACUUUCACAGAGGGUAAAUUG  
>N4174  
CCUUCCCAUGCCCUAAAUAACUAUUCUAUACUACAUUCCU  
>N4175  
GCAGAAGAAGCGGUGGAAAGACUCUAAGAGCCAGUAGAUA  
>N4176  
AUAAGAGUAAAAUUGUAUAGACUGAGCAGAUUUUUUAGU  
>N4177  
AGAAAUUGAGCUGGAAUCAACUUCAGCUCACUCUAACUA  
>N4178  
CUUGGCCCCUCAAUUCUCAGACUUGUAGGUCGGAAAGGUUU  
>N4179  
UCCAAAUGGCUGGCCAGAGACUAGUGUUGAACUUUUAGGA  
>N4180  
AAAGAUGACUCAGAGUUCAAACUGCAGAUAAAGAGUGAGAUG  
>N4181  
GCCACCAUGAAUCAUCAUGGACUAUGCACACUUGUCUGAAU

>N4182  
CACUAGUCCCUUCCUGCUAAACUACCUUGCUGCCAAGUUCU  
>N4183  
CCAUGCACUGUCUCAGAAAGACUCCCUCCAUUACCCUUGCA  
>N4184  
UAACUACAAUUUCCACACAGACUUUCCUCUCUGGAGAUGAC  
>N4185  
GGGACAGCCGAGCAGCGGGACUUCUGUUGAGAUUCCCCAG  
>N4186  
UGCCUGGAGGAGAAUGAAGAACUAGGGGACAGAGACAACCA  
>N4187  
CAGUGGGAGGAUGUGUGUGAACUUUCUGUCAAGAAAGCAA  
>N4188  
ACUAAAAAUCACAAGCGGAGACUCCCUGCUUCUCAAGAUUG  
>N4189  
UUAAGGAUUCAUUCCCCAAACUGCAGUUGUUAAAAUUGAU  
>N4190  
UGACCAGAUGUCCUCAAGGAACUGAUGACUCGCCCCACAGU  
>N4191  
UCUUUCACAGAACCAUGGAGACUAACUGCCAAGCUGACAUU  
>N4192  
AUGGCUUAGGGUGUGGAAAACUCAAGUAGUGUUCUCGGUG  
>N4193  
AAUUCUUCAUAGAUCUCAGACUGUGGUGUGGUGGCAUGAG  
>N4194  
UGACUUCACUUACAUUUAAAGACUUUUCUCAGAUAAUCCAAU  
>N4195  
UGAAAUGAUUACACUUUAGAACUCAAAAAAAAAUCCAUIUG  
>N4196  
CCGAGGCUUGGAAGCUAGGGACUUUUUAUAGAAAAGGGGUGG  
>N4197  
GCUGGAAAGAAAGUCCAAAAACUUGUCUACAGGGCCCCCAU  
>N4198  
CUAUGAGUAAAGCUGCGGGAACUCCAAACUCUUGUCUUGAA  
>N4199  
UUCUUGUCCUACAUAGGUAAACUCUAGGGCUUAGUUGGCAU  
>N4200  
UCUGGGCCAGAAGGCUGAAGACUGAUGCUGUAACGUUUUGG  
>N4201  
CAGGCAGCAGAAAAAGAAAGACUGACUGGACCUGGCAUGGG  
>N4202  
GGGUGAAGCGAAGACUUAGAACUGGUCAAUGUCCUGAGAAU  
>N4203  
AGAGGGGACUAGAAGGAGGGACUGAGAACAGAGAAGGAAGG  
>N4204  
UACUGUGAAUGUUGAUGUGAACUUUGACUGGCUCCCCCAUC  
>N4205  
AAAAAAGCAUUAUGAUCAGACUGAAACUAUGUCUGAUAAA

>N4206  
AUGUGCGAAUCAUGCAGGAAACUUUGUACAAGGUCAUCCUC  
>N4207  
AAAGGACUGGGCUACCCAGAACUUCCACUUUUCUUUAAGGG  
>N4208  
ACUUAUCUGGUUUCAGUGGGACUUUGAAACCAGGGAAGGGG  
>N4209  
UGCAGAAUUAUUAUUAUUUGGACUUAUUGCAUAGCAAACUUUU  
>N4210  
UGGCACAUACAUAAGCAGAGGACUGCAUGGUCAGGCCUUAGA  
>N4211  
AUCAUCGGCCGAGUGUCCAGACUUUUACAAGGCCUAAUGGU  
>N4212  
UAAACUCAAAUUAUUAUUAAGAACUGAAACAAUUUAGAAACUC  
>N4213  
UGUUUGUUUCUCUGGUAAAAGACUUCAAGUUCUAUAUUGGAA  
>N4214  
CUUGUGAGAUGC UUUAAGACUAUGUGUCCUUGACCAUGU  
>N4215  
CCUGACCAGAGGUCAUGCAGACUCUAAGAGAAUACAAAUGC  
>N4216  
AGAGUAGUAGACAGGAAGAAACUGACAAUUCAAUUUAAAAG  
>N4217  
ACAUAGACAUAGACUAACAAACUGGCUACACAAACAAGACC  
>N4218  
GGAAGAU AUGGUAGAGGAAAACUGCUUGUCUUAUGCCAACU  
>N4219  
GUAGACAAGGUUGGUCUCAAACUCACAGAAAUCUGCCUCC  
>N4220  
GGACCAACAAAGAAUCUAAGACUUGACCACCUGUGACUAGG  
>N4221  
AUUGCUAUGUCAGUGCUGAAACUGAAGAGGAAGAAUGCUC  
>N4222  
CAUUUUGUUUUUCCAAUCAGACUAAGAGCCUCUGGACUGCA  
>N4223  
ACAUUGAUGCCAUUUUAAAAGACUGAUAAA AUUGUUUUAAGA  
>N4224  
CUGAUAAA AUUGUUUUAAGAACUAGCUGUACUAAUCAAGU  
>N4225  
GUUUUAGUCCCUCUUUGAGGACUUUGUGACCGAGAAAUGA  
>N4226  
AAGUCACUUGUAUUAGGAAAACUCAGAAGUUUAUUUAGUGC  
>N4227  
GACUUGGCCAUUCUUUAUUGAACUGGGGCAUGC UUUGCUGAU  
>N4228  
UCCUAGUAGGAAUAUGGAAGACUUUGUUGUUGGAGUAAUU  
>N4229  
UUUCAGAAUGUGGCAUAAAAGACUGUUUUUGUGGUGUUUUGG

>N4230  
CCCCAGGGUGUGACAAAGAAACUGAUUUUCUUCUUGGAAUG  
>N4231  
GCAGGAGGACUUAACUGAGGACUGUCUGAGAGACCAAGGAU  
>N4232  
GAGGGUGAUUCUUUAAAAAAACUUCAGUGUGGUAAAUGUGA  
>N4233  
AAAGAGACUUUGAACUUUGGACUUUUAACUGGGAUAGACU  
>N4234  
CUGAGUGCCUCCAAAAAGAAACUAGAGAGAGCACACAUUAG  
>N4235  
CAUGCUGGAGAUAGACCUAGACUCCAAACACAUUUAUAGCA  
>N4236  
GGACUUCAUUCACUAUCUGGACUGUCUACUUGGGCCUCACU  
>N4237  
GUCAGUAAAGUAAGCCAUGGACUAGUUGUUGGGCAAAGGU  
>N4238  
UCCCAUGGUCUCAUACUCAGACUUGCUUAGAAAUCCAAAGU  
>N4239  
AUAAGUUAAGGUCAGCCAAAACUACUGAGGAAGUCCAGGA  
>N4240  
UUUUCUUGGCUUAUUAAAAACUGGCUCUGGGUGAGGUGUA  
>N4241  
UGAUUACAAAGAGAAGUAGAACUUAUGAUUUUGUAAACAUG  
>N4242  
CAAAAAUUUCCAACCUAAAACUCUAGAAUGAGACAUCCCU  
>N4243  
AAUCGAUGCCUUUAGAUAGAACUUAUAACUGCACCCUUUAA  
>N4244  
UGAUGCAGAGGCCACAGAGGACUGGCACUCAGUGUCUUUCU  
>N4245  
CUUUCAUGAAAAUUGUAAAAACUGUCUUCUGAUUGACCUUU  
>N4246  
UUUUUUUUACCAUUCAGGGACUUUUGAUGUUGAGUGCCUU  
>N4247  
GGACUGUCACUCAUCUCAAACUCCCCCAACCGGGAACAG  
>N4248  
GGACCAGAAUAAAUCAUGGACUGUAAUAGUACAAAACCAU  
>N4249  
UUGAUCUAGUCAAAUGGGGACUGGGGGAAGUCCAGAAUC  
>N4250  
AAAAAAAAAAAAAGAAAAGGACUCUGCAAAGUGGCGCCAAA  
>N4251  
ACCAAGAUGCACUUUGUAAAACUCUGAAAAACAGUCAAAAGG  
>N4252  
AGGGUUCAGAUUAAUUGAGACUGCUGGUCCUCCUACAGGA  
>N4253  
UCAGGAGACUGAUUUGUUGGACUAGCCCAAUCAUAGCCUGU

>N4254  
UAUGGCCUGGAAUACUUGAACUGAAGUACUAGAUAAUCUU  
>N4255  
GUGUAAAUAUUAUAGGGAACUAAGCUUUGAGAUGUCCA  
>N4256  
CCAUCAAAGGCAACUUGGAGACUAAAGGUUACUUGGCGUU  
>N4257  
CUGUGACUUAGCUUUUCAAACUAAGAACAAGUCUCCCCUG  
>N4258  
CAGAGUCAUCAGACUUCAGGACUCACAUUUAGAUGAGAUCU  
>N4259  
CAACAUUCAAGAAACAAAAACUAAGAUUUUUUAUUUUUA  
>N4260  
CAGUUUAACAGAUUCCCAGACUGUUCACAUUUUCACCAA  
>N4261  
UCCUGCUAUGAUGAUAACAGACUAAACUUCUAAAACUGUAA  
>N4262  
CAGGGUAUAUCCACAGGAAACUCAGAAAUGAUCAAUCUGG  
>N4263  
CUCAGAAAUGAUCAAUCUGGACUUUCCCCUGCAGUAGUUCU  
>N4264  
UAGAACAUAUCAUACAGACUGGACAUGAACAUACAUGA  
>N4265  
UUGUGAUUCUGGGCAUCUAAACUUCUGGGUGUGGGGAGGAG  
>N4266  
AAAACUACAUUGGGAGGUGAACUAGGAAGGAGUUUAAACAA  
>N4267  
GCAGAGGAGCUGAGAGGGAAACUCGCGACUUGAUAGCCCCG  
>N4268  
UUGUUUAAGGUAAUUGAAAACUUGUAUAACAAUAGAAUG  
>N4269  
GGAACCAGCUGAGGUACUGAACUUGUAUAUUUAAAAAAUU  
>N4270  
AAAAGGACCAGACUUUGGGACUGCUUUAAAAUUGCUGAU  
>N4271  
GCUGGGACUUGAACUCAGGAACUUCGGAAGAGCAGUUGGAU  
>N4272  
CCUAGUUGGCCCGUCAUUGGACUGCCUUUCCUCAGUCUCU  
>N4273  
CUGGAUUUCUUCUACCAGACUACUAAAAAUUCUGUUAU  
>N4274  
AGUCUGUUGUUACAAGAAACUUGAUUUUUUUUUCUUA  
>N4275  
CAUUAUUCUAGUAGUCAAAACUGGUCACAUGAUUCCUAAG  
>N4276  
GAAUGUUAGAACUGUUGAGACUACUGGGAUUUUUGAAGUU  
>N4277  
UUUUCGGUCCGGAUGUAGAACUCUGAGCUACCUGGAGGUG

>N4278  
GAGUUUGUUGUUCAGUAUGGACUCAGUGUUUGACGGAGUGA  
>N4279  
UGCCUGAUGGGGUGCUGAGAACUGAAUUCUAACCCUCCACU  
>N4280  
AAGUCUGAAACAGCCUUAAGACUUAUGAAUACUAUUGAAAC  
>N4281  
UUACAAAACUAUACUUGGAGACUUGGAAUUGAUUUAAGUA  
>N4282  
UCCAACCUUAAUGAUAAUGGACUGAACCCUCUGAACCGUAA  
>N4283  
AAUGC UUUAAGUCUUUUAAGACUUUUAGGGGUAUGGAAUU  
>N4284  
UAGAGGCCUCUCUGUAGAAAACUACUGUGGCCAGGACAGG  
>N4285  
UAGGAGCAUGGAUGUUACAGACUGUUCAGUGUUCUCUGUGA  
>N4286  
CCAAGGCAGAGCUGAGAAAGACUCCUCUCACAGCCGGCUUU  
>N4287  
AUAAAUACUAUAUUACACAGACUAUAUUUAUCAUAAUUUAA  
>N4288  
AGCAGGUACUUACCAUCAAAAACUACCUUGCUCAGAAGCCAG  
>N4289  
CUGUAUCUAGCUAGAGGAAAACUGAACGAUACGAACAUUUA  
>N4290  
UCAGAAGCCUAAUAAGAAGGACUUUAUUCUCUCAUACAUAA  
>N4291  
CAUACAAAUCCUAGAGCAAACUGUACCCCGGGAGUGGAGC  
>N4292  
GCUUAGACCUCUCCACUAGACUCAACCAGUACAAGUUAAA  
>N4293  
AAUUUAAACACGGAUGUAAAACUUUUUAGUAUGAUAAAGUA  
>N4294  
UGGCAGGUGAUUUUCUGUGGACUUGUUUCUCUGGCCUACUC  
>N4295  
GAUUACUCACUAAGAGUAGGACUUAUUGUUUCUUAUAAAAA  
>N4296  
UAUUUUUUUAAAUA AAAAGACUUUAUUUUUAUUUUACACA  
>N4297  
GUCUGGUGGUUCCUCAGUAAACUGGACAUAGUACUACCUGA  
>N4298  
GGCUAUUACAAUCCAGAAGGACUAGGAGAUAGGUCCCUGAG  
>N4299  
CAAAGGAAGUCAGGACCGGAACUGAAGCAGUCUAAAUAUUG  
>N4300  
CACUUCAUGUCCCGUUCAGACUCAACCCUCCAUAGCUAU  
>N4301  
UGGAUCAGUGCUCAGGGGAGACUUAGGUGAAGUGGCAUCUG



>N4302  
GUGACUUUCCUUCAUGAUGAACUUCAACUGUAAGUUGAAAU  
>N4303  
UAAACAAAACAAAAGAUAAAACUAAAACAAAACUAACAC  
>N4304  
UCCUUUGCCAUCUGAGGAACUGGUAGGUUAUACUUGCUC  
>N4305  
CACAGACUGUCUAGUGGAGAACUCUUAGCCUAAUUUGUCCU  
>N4306  
CAGAUUACAAUCCUCUCAAGACUUAGAGAACCAGAUCACACA  
>N4307  
CAGACUUCUAAACACAUCAAACUUCUACUUUCCUAUUUU  
>N4308  
UGGGUUACCAUGUGCAUUAAAACUCUAGAUUUCAAACAUG  
>N4309  
AAAUGUAAAUAAGGGUGUGAACUGUCAUAACCUUAUCACC  
>N4310  
UGGAUGUUGUGGGUGGGGGACUCAGAGUACAGACAGGAAA  
>N4311  
AAAAAUGUAUUCAGUUUGGAACUUUGGAGGGUUCUUGUUUG  
>N4312  
AUUCUGUUUUAAAUAUUGAACUGAUGUCACAGCUCACUUU  
>N4313  
UGGGUGAUCCUAUUCGUGGACUAUUUCCAGUUCACCAC  
>N4314  
UAGAAAGAAAUGCAGAGAGACUAAAGGAGCAUGCCCAAGG  
>N4315  
UAAAAGUGUUGUUUUUUGGACUCCAAAUAUUAUGAGGAGU  
>N4316  
UAAUAUGUUGUUCUACAAACUGACAGCAAGUCCCAUUG  
>N4317  
UUGCUAACAAAAGCAAUUGGACUUGGAAACCACACCAGGGA  
>N4318  
AUCACUGUGACUCUCAAUAAACUACAGAAUAUUAUGGCUGG  
>N4319  
AAUUUCAUUCUUCAUGAAAAACUUUCACUGGAAUUUGCACU  
>N4320  
AUUUUUUUUUUCCUUUAAAACUGGGCAGCUUUGUCAAGCU  
>N4321  
GAGCUGAUAUGUCAAUAAAGACUACAGAAGCUAAUCUCAAG  
>N4322  
GUUAGAUCAGUAGUCAGAAACUGAUUUUAUCUGUAACCCU  
>N4323  
AUGGACUCAGUAUAGAAAAACUUUCAGUGAAGUGAGUUGG  
>N4324  
AGCUGCCUGCGGCCACACGAACUGGGUUCUGAGUGGGGAG  
>N4325  
UUUGUCUCAUUUUGUCUGAAACUUUGCUUGGUAUCUUCUUC

>N4326  
UUUUUUAGAAUUUUUUUGGGACUUUAUUUAGUUUCACUUA  
>N4327  
GAUAAAUCUGCUUAGCAAAGACUACAUUUCUUAGAUUGAA  
>N4328  
AUUCCUUUAAUAGUGAGUGAACUGUCUAGCUAAAUGCUGCU  
>N4329  
UGGUGCAAUUGUGUACUGGGACUUUCUGAAUGGGAGAGUGC  
>N4330  
AUCUUGAUUCAAUUGCUGAAACUGUUUUGUUUACUUUAAA  
>N4331  
ACUCUCAUCAGUGUUGCGAAACUCUCUUCUCCUCAUCCUCU  
>N4332  
AUUUUCCUUGAAAAUAUGAAACUCAAAGAUCACAGAAAAGA  
>N4333  
AUUCACAGAACACACUCUAGACUAUGGAAGUCUGGGAGAAG  
>N4334  
ACUUAUAAAUGCUCUACAGACUUGCUAUUCUGACAGAAU  
>N4335  
CACAAUGUAGGUAGCCAGAGACUGUCAGUUUAAGUGCCACC  
>N4336  
UUUGAAAUUUUAGAGUAAAACUUCUAAACAAAUUCUUAU  
>N4337  
AAUCUUAGUCUUAGGGUGAAACUAGGCCUCAGGCAAGAUUU  
>N4338  
CCACCCCUCCAUGUAGCAGACUCAGUUACCAUGUGGAUCU  
>N4339  
CUUCUCAGCCUGUCAAGGAGACUUCACUGGAGUGUGCGUAG  
>N4340  
CAUCCUGUACAAUAAAAGAACUUCUGCAGGUACUGCCAUC  
>N4341  
AAUAAACAAGACCUCAUGAAACUGAAAAACAUUUGUAAGGU  
>N4342  
ACUCUGCACAAUGCGCAUAGACUGUCUAACAAAACCACCUG  
>N4343  
AUUUUCUUGUACUUCUGAAGACUCAAGAAUUAUGACAAU  
>N4344  
UUAUUUGUAUUACACAGGAACUCAAGCCAAUAGUCUAGCC  
>N4345  
UAGCAAAAUUAUAGUUAUAAAACUAGCAUCAAUAAUUUAA  
>N4346  
UGAAUCCUUUAGCUUCUCAGACUUUUUAUCUAUCAUGCUUCU  
>N4347  
ACAUUUCUUGAGUUCGUGGACUAAAGUUCAUCUGAAUGCU  
>N4348  
AUAUACCUAAAAAAAAAAAAACUCCACCAUACCAUGAAGAC  
>N4349  
UCUUACAUCUGUCUUUGCAGACUGUGUGGAAUUAUAAACUU

>N4350  
CACAGAAUGUCAUCAUAUAGACUCACAGAAAGUGACAGAGG  
>N4351  
AGAACUUUGAGCUAAAGCAAACUCUAUCUCCUUAUUUAAG  
>N4352  
GCCAUUUGGAGACAUUUAAAACUACUUUAUAAACGGUUGAC  
>N4353  
GACAGAGACAGAAAGAACAAACUAAGUGUAAGCAUGCAUAA  
>N4354  
ACAGAUAGGCUGAUCAAUGGACUAGAUUGAAGACCCAGUA  
>N4355  
UGUAAAGUUUCUGAUUGAAAACUACCCAAAUAUUUGGAG  
>N4356  
UGUUUUUAUCUCUCUUCAUAAAACUAAGACAUCUUCUCAUG  
>N4357  
UGUGACAGGCAGGUCUUAGGACUUAUGUGAACUUUAGUUUA  
>N4358  
UUUUGUUUUUACUUUUUGGACUCUUCUUGAGUUCUUUAUA  
>N4359  
AAAGUGGAGAAUCGCCUUGAACUCAUUGGUAGAGGAGACAA  
>N4360  
CAAACAAACAAAUAAAAAAACUAACCCAACCACAGAGCAG  
>N4361  
UGCCACAGAAUAGUUGGUGAACUGGGGAACUGGGCCAUAUU  
>N4362  
CAGACCACACUGGUCUUAGAACUUCAUGCUCUUGACAUUGA  
>N4363  
GUAUCUCAGCUUGGCCUCGAACUCUGGGAUCCAUGUGCCUC  
>N4364  
CCAGCAACCCUCAGCGAUGAACUCAAGCAUUGGUCUCUGGU  
>N4365  
CUUCUUAGGGCAAGAGCUAAACUACUUCUAUUACAACAGCU  
>N4366  
CCAUAAGCCUCAAGUCCGGACUGUAGCUUGUCUGGCCUUG  
>N4367  
UUAACACAUACACUAAUCAAACUCAGGGCUGAAAUCAACCA  
>N4368  
AAACCAGUAACCAACAUCAAACUAAAUGGAAAGAAACUUGA  
>N4369  
GCAAGAUUUUGCUGAAAAAAACUAGAUUAGCUGUCUCUUG  
>N4370  
GGCGAGAAGUACAGUAAGGAACUAGCAAGUCCCAUGAUUAC  
>N4371  
AUUUCUAGAACACAAUGAGAACUUUGUUCUCAAGGCAGAA  
>N4372  
AUUUGAAAUCACUCCCCAAAACUGAGUUGCUGGACGUAGGA  
>N4373  
GAUGCCAAAGAUUAGGAGGACUAUAAUCAUGGUUGGCAAG

>N4374  
CUGACUCAUGUCAAGGCUGGACUCCAGCAGUAUUGAUUCUU  
>N4375  
ACAUACUCUUGGCCUCAAGACUUGAAAAUAAAUGCUUCUA  
>N4376  
AAACACUUCAAACACUAAAGACUCAAAUCUAUCAAGGUGAU  
>N4377  
GUGGGCUAGUCUCUGAGAGAACUUGAUGGUCAGGCCAGCCU  
>N4378  
UUGAUGGCUGAUUCAACUGAACUUUUUUGGCCAAACUCCU  
>N4379  
GGCAGUGACUCGGCAAAAAAACUCUUAUGCACAUGUGCACA  
>N4380  
ACUCCUCCAUCCUGAUAAAACUACGUUGGAAUCAAUCAAU  
>N4381  
UUCCCUUAAAAAGACACAGACUAAAAGGAUCAUUGAUAAA  
>N4382  
UUCUUUGUGUAAGGUUAAGGACUCUGGCAAUUUGUCAAAU  
>N4383  
ACAAAUGUGGUGAGGAUCAACUCAAGUCUUCAUGCUAAUG  
>N4384  
GGAAGCAGAUGGCUUUAGAGACUUCUGGGUGCCAGUUCAGA  
>N4385  
CUGUAUCCUUGACCUCUAAACUGAUGUUGUUCAAGGAAUG  
>N4386  
AAAUCCUGACUAAGACAGGGACUAUAUAAACAUCAAGGAGU  
>N4387  
GCUCCAGCCCUAAUUUCAGACUACCCAUAAGAAGGGUCCU  
>N4388  
UUUU AUGUCUACAAUCUUGAACUAUUCUUGGUGGUCUGAUU  
>N4389  
UGUGAAAUAGUUUGAAGAGAACUGCUAUUAGGUCUUCUUUG  
>N4390  
AUGAGUAUCUACAAUUACAAACUUGACAGCCCCAGUGC UUA  
>N4391  
GUUUGGCAUGGACCUUCAAACUUCAAAGCCCACUCCCAGU  
>N4392  
UCCCCAUGGUUCCUGCUAAACUGUGAACUCUAUGAAGAAA  
>N4393  
GGUGGAAUCACCAUGCCUGAACUAAAGCUUUACUACAGAGC  
>N4394  
UUCUUUUAAUUUGGUUAUAGACUGUUCUAUAGUUCUAAGAU  
>N4395  
CUCAUUAAGCACUUCUCAAGACUGUUGAAUUGGAGCAUGAG  
>N4396  
ACAACAAGAGCGAACACGAGACUAAGACAAAAAGAAACCA  
>N4397  
CAAGAAGACACUGAGACCGAACUCAAA AUGUUGAAGGCAAG

>N4398  
GGGGUGGCUAGCCUAGAGAACUAGGAUAGAAUCAUGGGAG  
>N4399  
UUUACCUUAGACUCAGGUAGACUCUUCAGGCAGGGCAUCUC  
>N4400  
CCAAACUCCUAUAACCAAGGACUGGAGAUACUUAUAACCU  
>N4401  
AUAGAUUUUAUAAAAUUUAGACUUUUAAAAACAUAUAUGUC  
>N4402  
AGGAUGGUGCUAUUAUUAAACUUGUAUACUGGGUCAGGAA  
>N4403  
GGUCCUCUUUUUUUCCUAGACUUCAGCUAUAUGUCUCUUU  
>N4404  
CAUGUCAACAUAAAGUUGAACUUUAUCUUACAGUAAUUAU  
>N4405  
CUUGUUUGUUUGACUUGUAAACUUUAUAUGCCCCAGUACAG  
>N4406  
UAUCUUUAGGAAGUGGUAGAACUGGGUUAUACAUUCCCCAGCU  
>N4407  
GACUCACCCGAAAAUCCAGACUGACCAAGGGAAUACUGAU  
>N4408  
CUAUAUAUCAGGCUAGGGAGACUGGCCCAGAUCUCCUUCU  
>N4409  
GAUAGAGACCUCCAAUUUAAACUCUCUCCACAUAUAUGUCCA  
>N4410  
AUGAUCCCAGUCUAUUCUAAACUAAAGGCAGGUUUUUUUUU  
>N4411  
AUUGGAAACAGCUACUCUAGACUGCUAGGGAUUUUUUUUA  
>N4412  
AUGGAAGAGUUAGGGAAAAGACUGAAGGAGCUGAAGGGGUU  
>N4413  
AGGGGGGUUGAGGAGGAGAAACUGGGAAGGGGAUAACUCU  
>N4414  
UCAAAAACCCAUUUGCUAGGACUCAUUAUAUUUGCAUGUUU  
>N4415  
AUUUGGUGUCAACUAUUAGAACUCCCCAGCCACAGAUACCA  
>N4416  
UGAACCAUGUCACUAGAAGAACUGCCAUGGAACUGGCAAGG  
>N4417  
AAUAGCAUUGAGUUUCUGAAACUCGAGACAAUUUCUAAAAU  
>N4418  
AUGGGCAUGAUUAUAACAGACUGUUUAUUCUAUUAAAAU  
>N4419  
AACAGAUUAAGUGUAUAGAACUGUAUUUUUAAAAUUCAA  
>N4420  
GCUUUAGAUCCAUUCUCUAGACUGAACAGAACGAGCGAGCA  
>N4421  
AAACAGAGUCGAAAAGGUGGACUCCAUCAGCAUGACCCA

>N4422  
UAAAUGUUUUUUUAUAAGACUUGCCUUGGUCAUGGUGUC  
>N4423  
CCCCAAGAGGAAGCAGGUGAACUGCGUGGAGCAACAAGAGG  
>N4424  
UUGUGAAUCAGGGACUGUGAACUAUGGAGUGAAGGGUUCAG  
>N4425  
CAAUACACCUUGAGAACUAAACUUUCUCUUUGCAGGUAAGA  
>N4426  
UGAGCUAACAAGAUUCCAAACUAAUAUUAUGUGACUAAGG  
>N4427  
GUAAGAACCAUAAAAUAGAACUUUAUAUCAUAUUUUUAAU  
>N4428  
UUUCUAAACUUGUAGAUACAGACUGUUAUCAGACAUGUUUC  
>N4429  
UAUGGCUUACAUUUGGAAAGACUGAUUAUUAAAAUAUAC  
>N4430  
UGUAAGGAAGAAACAUUAAAACUUAUAUAAUUAUUUUUCU  
>N4431  
GCUUGAGGCACAACAGCUGAACUUAUUCUCUGGUUCCUCCA  
>N4432  
UGUACUAAAUCUCCUAAGAGACUUUCGACAGAAGUUAACAC  
>N4433  
GAAUAUUGUAGUGUAGAAAACUGGAGAGACUUAUGCUAUA  
>N4434  
GGCCUUUUUUGGAUGGGAGACUAUUAUAACUGCUUCUAA  
>N4435  
GACUCUAAACUUACACACAAACUGUGCCCUAAAGUUAUUC  
>N4436  
ACAUAGGUGCUGGUAUUGAACUCAGGUCCUUACAGUUGCA  
>N4437  
AAUUUCUUGUUUCUUUGGAGACUCAGUUGUGUCAUGUGAUG  
>N4438  
CUAAAUAACAAUGGGGAAAACUUUAGGAGGAGUGGAGCUA  
>N4439  
ACAUACAAGAAGCCUACAGAACUCAAAAUAGACUGGACCAG  
>N4440  
CUAAUCCCAGUUCUUCACAAACUAUUCACAAAAUAGAAAC  
>N4441  
CACCUGAUUUCUUAACAGAGACUCUAAAAGUUAGAAGGGCC  
>N4442  
CUAAGUGUCUCAAAGAAACUGGAGAGAGCUUACACUAA  
>N4443  
UUAUCUUAUUGGCAUCAAGAACUGGUCUUGAAAACAGCUGU  
>N4444  
AAAGUGGAUUGAGGGUGUAAACUUUCAAGCCACCCCUACU  
>N4445  
CUAAUCAAGAUGGACAGAGAACUACUAUAACUUGGAAAAGG

>N4446  
CACAUUCUGAGAGUGGGUGGACUCUUCUAUGCCCUGUUACA  
>N4447  
UCUAAUACUCAAUAAAGUAGACUUUCAAGCAAAGUUAUCA  
>N4448  
AACAAAUCAAAUGGAAAGAAACUUGAAGGAAUCCACUAAA  
>N4449  
GGACUUCAUAAAAUUUAAAAACUUCUGUAAGAAAGAGGACA  
>N4450  
AGAGGUUCAGGGAAGGAGGGACUUGUGAGGGAGAGAGGAGG  
>N4451  
UCUGAUAACAAUAUGUUAGACUCCUAACCCAGAACCACUC  
>N4452  
ACACAAACUCAUAGGGUGAACUACCCAUCAUCUGUUGAUC  
>N4453  
UGAUGUGUGUGUAUUUUAAGACUGCAUAUUCUGAACUAGAC  
>N4454  
CACACUGACCCUAGAUGAGAACUUGGAGUCUCUCUACUCC  
>N4455  
AACUAUUUUUCAAAUGGGGGACUGUUUUAAUGGGGUAAUAU  
>N4456  
UAUACCCAGGUCCUGACAAACUAGGAUUCAAAUAUAUUUG  
>N4457  
AUUAAGAAACAUAACCUCGGACUGUUAUAGCGGGUGGUGG  
>N4458  
AACAUAGGAAAGACCCUUGGACUCAUUGGCACAGGGGGAAA  
>N4459  
UUAUCCUUAAAAAUUUAUAAACUUGAAAAUUUAAGGAAGUC  
>N4460  
AGUCCAACACAAGGAGGGAAACUACACCCAAGAAAAAAAC  
>N4461  
UCAGAACUGAGCCAAAUAACUUUUUCUGUCUUUAUUGUG  
>N4462  
CUUUUGGGCAUAUGUCCCGGACUGGAAUAGCUGGGUCCUCA  
>N4463  
GUUGCUGAAUUAUGAUAAAAACUGAAACUCAGUGACUACAU  
>N4464  
AGACAGAGUCGAAACAUAUAAACUUCUCAGUUAUCAGAGAU  
>N4465  
AUAAACAAUAAACACUGGGACUCACACUUAUACUCAGAUG  
>N4466  
UACAGUUUGUAUAUAAAGAAACUGAUUUGGAGAAAUACAG  
>N4467  
UACAGCGUGGUGUUGCCUGGACUUAUUUCUUCUGAGUAAU  
>N4468  
CCUUGCUCACAAUGUGGGUGAACUUGAAGAGUAUCCAAGA  
>N4469  
UCUUGACAAGUGGAACUAGAACUAGAGAAACAGUAAAUCU

>N4470  
UUUUCAGGAAAGUGAAUGGAACUAGGAAAUUUUUUGUGAG  
>N4471  
AUCUACUCUCUACACUAAGAACUUUACUUAUAGGAGCAA  
>N4472  
UAAUUAAGUAAAAAGUAAAAACUACAUUUACAAAUGUUUU  
>N4473  
CUUAUAAUAAUCAUUUAAGACUAGAGAUCAUCACUCUUCG  
>N4474  
GUGUCAACUUUACAAUGAAAACUAACCAUUACAGUUUCAA  
>N4475  
UAGCACAUGUAGACACAUGGACUUACAAAACAUAAUGAAAA  
>N4476  
GUCAGAGAAGACUUAUUAAGACUGUAAAAUGGCACUCAUA  
>N4477  
UAUCAUACUCCUCUUUCAAGACUUAUCAGAGAAGCUACUAU  
>N4478  
CUAAUAGGAGUACAUCUAAGACUAAUACACAUAGAAUAAUA  
>N4479  
UCCACUUUACUUCUGAUAGACUGUCUUGAAUUUCGUUAGA  
>N4480  
UUAAGUAUAAGUCCUCUAGAACUAACACUAUCAUAUGGAAA  
>N4481  
CCCGAAGCAGCCAGCAGCAGACUGGGGGAAGGAUAAGAAUA  
>N4482  
UUCUCAUCCACUCUCAUUAGACUGAACUCUUGGUGCUUUGA  
>N4483  
UUACAAUGAAUUAGAAAAGGACUAAAACUUCUGAGAAUCC  
>N4484  
GGUUCAGUGAGUAGCGAAGGACUGAUGACCUGAGUUGUAUC  
>N4485  
GCAUUUAAUCUGAGACUUGAACUAUUCACAUGAUAGCAGUU  
>N4486  
CAAAAAGAUUGAUUUCAGAACUACUUUAAAAAAUCAGGG  
>N4487  
CUACUUUUAAAAAUCAGGGACUGGCACCAUUCUCUCCAC  
>N4488  
CCCCAAUCCAAUCGCGCGGAACUCGAGACUGCGGUACAUAG  
>N4489  
UGACACAAUAAUUGUGGAAGACUUCAAAACUUUCAAUUACC  
>N4490  
UCAGACCACCAUGGACUGAGACUGAUCUCAAUACAACAU  
>N4491  
AGAGUGCUCAGACAAAUGAAACUCAGGAGAGAGCUAGUCUC  
>N4492  
CAAUUCUCAAGAACAAAAGAACUUCUGGGGGAAUCAGCAUC  
>N4493  
UUUUGAAACAAGAAAAUGAAACUGUGAGGAAAAGUAUGAAG



>N4494  
AGCUUUUACAAUCUUGCUGAACUCUAAACCCUAGAUCUUGG  
>N4495  
AAUGGCGACCCUGUAGGAGGACUAGCAGUCUCAAUUAAUCU  
>N4496  
GACUGCAGAUAGGAACCCAAACUUAAAUAGCAGUCCCAUAG  
>N4497  
UGCUCUCUUAUAGAACCAAGACUACCAGCCCAGAGAUGGCA  
>N4498  
GAUUACCUGAAGUAAGUAGAACUUAUAGAGGGUAGUCCUUGA  
>N4499  
GAGAUGAUUACAUAUUGUGGACUAAAGCACAGAAAGACAAA  
>N4500  
CUCGCACAUCUGGAUAUAGAACUCUCAGCUCUUCUCCAGC  
>N4501  
UAGGUGGAACAACAAUAUGAACUAAUCAAUACCCCCUGCCC  
>N4502  
ACUUAAGAUGAGAAAAGGAAACUUAUGUUUCCGGUUUUUAA  
>N4503  
CCAAUCACCCAAUACAAUGGACUGUAUUACAAUUCUAAUAA  
>N4504  
UGGCUCUUGGGAAUGGACGGACUAAUGUGACAAGAGCAUAU  
>N4505  
GAGAGCACCUUAUCUUUUGGACUGACAGGUGUGAGUCCCA  
>N4506  
GAAGCAGAAGUUUCUGGAAAACUAGUGAUGUAUCUUUGCAU  
>N4507  
AUUUGAUAAUUUACACAUGAACUAUCCAUAGCUUUCUAACU  
>N4508  
GCUAAUCAUUGUGAGUAUGAACUGCCAAGGAAUGGUCAUAA  
>N4509  
UCCUCAUAACCUACAGGGACUAGAGUCAUCAGAGAACUG  
>N4510  
UCUCAGUUUUUUUCAUCUGAACUCUCCUAACAACUUUUCAU  
>N4511  
CUCGGUGUGGACCUUAGAGACUGGUACGGACAGAAGUUUA  
>N4512  
UGGAGAGUGAAUAGGAAGGGACUGGGAGAUGAGUGGGAUUU  
>N4513  
CAUCAGACUUCAUGGUAAGAACUCCUCCUUUCCUUCUCAGA  
>N4514  
UGAUAACCUUUUAAAUAUAAAACUCAGUCUCAGUAAUGGAUG  
>N4515  
CUCUCCCUUCAGCUGUGUAAACUACUCCUUCACGUAGCUA  
>N4516  
AAUGUAGCCUCAGCUUAGGACUCUAGUACUUGAAAGAAUC  
>N4517  
GAGGAUGUUGUCUUGGGGGAACUAGACAUUCAAUGGAAAC

>N4518  
GCACAUUGUGUCACCCACAGACUCCGUUCCUUCACCACUA  
>N4519  
UUCUGAAUAAGUUUAGUAAGACUUCCUAAGCAAUGCCAUCG  
>N4520  
GCAUUUUUUAUCCACAUUUCAGACUAGGCAGGAGCAAUCAUA  
>N4521  
GCAGGAGGAAAAGUGAAGAAACUACCACAGAGCUGGCCUUC  
>N4522  
AUAUCCUCUUUAACAGAUAGACUAAAAAGAUAAUUCAGAUU  
>N4523  
GCAUUAUCCUUCAGUUAAAAACUGUCCAUCCUAGAGAGCUG  
>N4524  
AUUUUCCUUGUACACCUAAGACUUUGGGACUUUCAAAUAAA  
>N4525  
GUCAAGCAACACAACCAGGAACUAAUCUGUAUACUAAUCAC  
>N4526  
AUUGUCUUACCCUGUAAUAGACUAAUCCAAGAAUAAGUUGG  
>N4527  
UUGGCUUCCUGGUUGGUGAACUAUGACCCUAAGAGGAAAU  
>N4528  
UAUUGGAGGAAAGAUGUGGAACUUACUAGGUUUUAUAGU  
>N4529  
UUUCAGAAAUCAUUUCAAGACUGACCCUUAUGCAAGACUU  
>N4530  
ACCCAGAGCUCUCCAACAAGACUGGCCUUGCAGCCAGCAC  
>N4531  
GUCUAAUUGUAUGUGGGUGAACUAGCCUGCAGAGGAAUACU  
>N4532  
UUUUUCUGUUGCUGUGACAAACUGAUCAAAGCAACUUAGG  
>N4533  
CUGUGUCUUGUGUAGCAGAGACUAAAUGUAGAUUUUAGUAA  
>N4534  
CCCUAAAUCCGUUUGUAAGGACUGUAUUAGUUCUGCCUACU  
>N4535  
CAAGUUAGGCACACAAAAAAACUAUAAAUGUAAUUGAUGAA  
>N4536  
ACAGGUGUUUUACAUUUCAGACUGGAGGCAAUCAGUCCAG  
>N4537  
AUAUCCAUAUACUACCCUGAACUUCUAAUCAUUCUGCAUCC  
>N4538  
CUGGCUCUUCUGGAAGUGAAACUUCAGUCUGGCACCUGACA  
>N4539  
CAGAAGGAUUUGUAGGGCAGACUUCCCCCAGCUUCACCCAC  
>N4540  
ACCUGAACCUAGCUAACAAGACUUUUUCUACAUCUGAAUA  
>N4541  
UGAAA AUGGGCCUCCAUUGGACUUGCAAACGUUAUAUGCCU

>N4542  
GAUUCAAAAAUGUGAUAAAACUAUUGGACAAAGACUUUUA  
>N4543  
AACCAUGGCCACCAUAGCAGACUUCCCUCUUCAUCAUUAU  
>N4544  
UGGUUUGCAGAGGGUUCUGGACUCUGAACGAUUAGGAGGUG  
>N4545  
UUACAAUAAAGCAAUUAGAACUGAGAAAACUUUUUAUUAUAC  
>N4546  
UUCUACUAUCUCUGGCUAGAACUAUGAGGUCUAUUACAUAU  
>N4547  
CUGAGGGGACAUUCUUUCAGACUUGCUGCAUUAUCUUCUCU  
>N4548  
AUUUUGCAUCUUGUUUUGAGACUAUUAUAAGUUUAUGGAAU  
>N4549  
UUUCUGAGCAUUUGGCUCAAACUUUCUCUUCUACUGAAGUU  
>N4550  
ACGGGUCCAUCGGGCUGGGGACUCAAUUUCUCCUCGGUUA  
>N4551  
AAUAAAUCAAGGAGUAAAAACUUGAGAUGAGUGUGUUGGG  
>N4552  
GUUGCAAAGUUGGACUACAGACUAUAAGUCAUAUAAAUU  
>N4553  
UAAAUUCAAAAUACACAGGAACUCAUUCAGCUGAUUGCUCAC  
>N4554  
AUCCUCUCUCCUCCAAAUGAACUCCAGGGACAAAUGAGCAG  
>N4555  
CAAGAAACUAUAAGCAGUGAACUUGGUAUGUGAUUAUGUGUGG  
>N4556  
UUUUUUGGACUUUUCAAAAACUUACAUAACCACAGAACUUU  
>N4557  
UUUGAGAGAGGAAAUUCUAAAACUCUUUGUGUAGCUGAGAGU  
>N4558  
GAAAUAAAAGAUGAAGUUCAGACUUUGGAUAAAAGGAUGCC  
>N4559  
AAUGGCUGGGCCAUUCUGAACUCCCACAUGUCUAACAUAUAC  
>N4560  
GAUAAAUCUUGCAGAAGCAAACUUAUUUGGAGUUUUUCCU  
>N4561  
CAAACAAAUCAUAGAGAGAAACUUUUUUUCUACAAAAACAAG  
>N4562  
ACUACAAUCAGACAUAAAGAACUUCAAGGACCAUAAGACCU  
>N4563  
CAAUUGCUCGACAGCUUAAGACUCCUGAGUUCUAAGACCU  
>N4564  
GCCCAAUUAACAUUGGAGAACUUACAAGAGGCUAAGGCUU  
>N4565  
GCCCAGGGUCAUAAAGUCAGACUGUGCUGAGCCUGCUUGAG

>N4566  
UCUAAAUUAGCUUGGUACAAACUUAGGACAUAGGAUCUUUC  
>N4567  
AAUCUUAAAACAAUGUUAAGACUCUCUUCUCAGAGGUUJCA  
>N4568  
GUCAAGGACCAAUACAUCAGACUCCUAUAAGUUUAAACAAAG  
>N4569  
AGUACAUUUCUUGGUGUCAGACUCCAGAAGUUUUCACCCAA  
>N4570  
UAUAGCCAAGGAUGAUCUGAACUUCUGAUGCUCUACCUCU  
>N4571  
GUAAACCAUAUUCUAGUGAACUAUAAUUGGAAUAAAAGUA  
>N4572  
ACCAAUCAGAAUACGCCAAACUUCUCACUGGAGACUACGU  
>N4573  
UCACAAACAGAAGGAGGGAAACUACACCCUAGAAAAAGCAA  
>N4574  
CCUAAGAGAGUGGGAAAAGAACUGUGUUCAAUAAUUUAAAU  
>N4575  
CUGAGAGUUCCAAAAUAAGGACUCUGGCUUCUUAUAUAUGA  
>N4576  
AAAUUCUAAGUCAGUUCAAAACUUCCUAUCUAGAAAUGGU  
>N4577  
AAGUAAAAUAAGAUCCAAAACUUAUAAUGGUAUGAGAAAAA  
>N4578  
UAAAACUAUGUCCCCUCAGAACUCUCCAGGAACCGGCUGAA  
>N4579  
GUCAAUGUAUUAAAACUCAGACUUGAGUUCUUCUCAUJUGC  
>N4580  
CAAACAUGCUGCUGAACAAAGACUUUCUCAUAUAGGUUCUGA  
>N4581  
UGACUUUAAUCUGAAAGAGAACUUCUAUUUCUUCUCUUUU  
>N4582  
GUGAGGUUCCAUUGGAAAAAACUUGAGUUUCCCUUCCCAA  
>N4583  
GGGCAUCGGCUCAUCCCUGGACUUGAGCGAGGGUCUCCCCG  
>N4584  
UUGC UUUAGGUAAAAGUGAGACUCUGUUAGACUAAGUAAGU  
>N4585  
UGAGUAGAAUUCAAUUACAGACUGAGUAACGUGUUUCAGUA  
>N4586  
AGGUUUGAGUUUUAGGAAAGACUUGGACCUUUCGGGUUUUG  
>N4587  
ACUCUAUCCCGUGCAAUGAGACUAGCCUCAUGGGAUAUAAG  
>N4588  
CACAUGAGGAACUGGCAAGAACUCACAGCAGCUUUGACAUU  
>N4589  
CCAGUGGCAAUCAACUGCAGACUGACCUUUAACAUCAGUUU

>N4590  
AUAUGGGGAACACAAAUGGGACUUGGGGUUUUUCUUCUUUG  
>N4591  
AAAACCCUCAAUUCCUCUAAACUUAGCACUUGGUUUAAGA  
>N4592  
UAACAAUUUCCUCCUGAGGACUCCAGGGGAGUUUGGGAGC  
>N4593  
GUCUCCUUCACAUUGAAGAAACUGAGGCAUAGAAUGACUGG  
>N4594  
UUGCAAUAUUUAUACUGGAGACUUCUGGAGUGACAGCACUC  
>N4595  
UCUGAAGCUUUUAAUAUGGAACUGAAGGUUUUCCUCCAAAU  
>N4596  
UGAAGAAUUGAACACAGAAACUUUUGAAUCCAAACAAGCA  
>N4597  
AGGUUUCUAAUUGGCCUGGAACUCACCAGGCUGGGUUAGCU  
>N4598  
UCCACAGUAGGUCAGCACAAACUACUAAUGUGGUGUCCUG  
>N4599  
AUCACAGCAACAGAAAUGAAACUAGGACCAGUUUUUAAAGC  
>N4600  
AUCGAUAAACCUCAUGUCAAAACUACAUAUGUCUCAAAGUC  
>N4601  
AAAAAAAAUCGGUCUACAGAACUGGGCACUGUAGGUUCUA  
>N4602  
GAAAUACAGGAACACUGAAACUCAGGGACCCUCUAGAUUA  
>N4603  
CCCAUCACAUAAUAAUCAAAACUCCAAAUGCACUAAACAAA  
>N4604  
UUAAUAUCUCUAAUAUGAAACUUAUAUUACCAACAUAUC  
>N4605  
UUUAAUUCAUUAGUAUGAGAACUGUCUGAUUUUUUAUGAGG  
>N4606  
UCUUUGAGUUACUCUCUCAAAACUGUGCCUUCAAACAAGCCC  
>N4607  
UGUAUGGAGGUUAGAAGAGAACUUGCCAGAGUUGGUUCUCU  
>N4608  
GUGGCUGCAUAAAUUACAGAACUGCAUUCUGGAAUCUGAGG  
>N4609  
AGCAGAGCUGAAAGAAAGGAACUAGACGGUCAGAAGAACAG  
>N4610  
CUGCAAUAGUCCUUAUGUAGACUAAGGUGC AAAUAUUAUG  
>N4611  
CAAAAAGCAAACUCUGGAAGACUGGGAAGAGUUACAUUGUU  
>N4612  
CACCAGAAAUCUUAGCUAAACUGAACUUUUCGUUACUUGA  
>N4613  
CUAAUAAAAGAAUAGGAGGAACUCCAGCCCCUAAAACAAU

>N4614  
ACUAAUAUAAUAAACUUCAGACUUCUAACUCAGUGACAUAU  
>N4615  
AGCAUCCUGGAGUUGGACAAACUCUGCUCCUGAAUAUGCUG  
>N4616  
AGUACAGAUAGAGAAAAAGGACUCAAUUUUCUUUAAGGGGU  
>N4617  
CAGGAUGUGCAUCUGGGAGAACUGAGAAGUGAGUGUGAUGG  
>N4618  
GCACCAAUAAGCCCAUAAGGACUGGCACCAUUAGGAGGUGU  
>N4619  
AAAGAGCAUAGACCAGUUAAACUACUCAAGUUAGUCUGCU  
>N4620  
UAUAGUACUCUAUCUGCCAGACUACUAGAUUAUUGUGAAUA  
>N4621  
CUCAGCAUCAAAAAGGAAAGAACUUAUCAAAACCACAAGAAA  
>N4622  
AGCAAAAUAUGAAUAAUGAAACUAUUUCAUUUAUGACUUUC  
>N4623  
UCUCUUGUUUUUUUAAACAGACUCUCUUCAUUUUGGAAUAAU  
>N4624  
UCAUUUACUCUGUUGUAUGAACUCGUUGCUGGGGUAACCU  
>N4625  
AUGAACGUGAGGCCAGUCAGACUCCACUCCUGCUGCACAU  
>N4626  
GCCCAACACUGAGUUCCAGACUUAGUGCCAGCAUACCCAA  
>N4627  
AUCACAAAGGAUGACCCUGAACUUCUGAUCCUCCUGCCUAU  
>N4628  
GAUUACAUAGUAGGUUUGAGACUAGUACGGGCUACUUUAAA  
>N4629  
UUUAUUCAUAAUAGCCAGAAACUUGAAACAGAUUAAGAAA  
>N4630  
GCAAACCUAGUACAGUGGAAACUUCUGAAUCUAUGAAGGU  
>N4631  
ACUAAUCAGGGUUCACAGGGACUCAUAGACACUGAAGCAGC  
>N4632  
CAGAGCUCCAGCUGCAAAGACUGAGUGUCUGUGACAAGGA  
>N4633  
ACAUGGGUUCUGGGGAUGGAACUCAGAUCUCCAGGCUUGCA  
>N4634  
CAAGAUAAUGUAAGCUUAGGACUUAAGCAUGAUUCAUUGCU  
>N4635  
GUAUCCAGACUGACCUCAAACUUUUACAUAGCCCUGGAUG  
>N4636  
AUGUCUUUCCUGCCCCAAGAACUAUUCUUGAAACUCAUUA  
>N4637  
GCUCAUGAUACUGUAUCUAGACUUCAGGCCUCCAUUCACAC

>N4638  
CUUGGAAAAAGAAAAAAAAAAACUAACUAAAAAUUUUAAA  
>N4639  
CCACACAGCUGGAGAGAGGAACUGAGGAACUGGAGAAUUUG  
>N4640  
AAACACAAACCAGCAGAAAAACUGUCCCUAGAACAAUAUGA  
>N4641  
GCCACUUGGUGAUGGAGAGAACUGACUCCCCAAGCUGCCC  
>N4642  
AUUAUAGAUAGCACAGGUUGGACUUGAGUUGUUUAUUUUUU  
>N4643  
AGUAACCACCCUGACUUCAAACUCUGGAUCCUAGAUUGUGC  
>N4644  
GCCAUUCUCUUAAGUAACAAACUCCAGGUCAACCUGGACUA  
>N4645  
UGCACUUUUACAUUUUUAGGACUUUGUGCUAAAUACAGAAU  
>N4646  
UGCUUAAAAAUAGCAGUAAACUCUUCUUUUUUUGUUUUUU  
>N4647  
GUUGCAGGAUUUCUAGAGAACUUCAUGGCAGCUAGUCAUA  
>N4648  
UAAAAGUGCUUGCCACUAAAACUGAUGACUGGCAUUCAAGU  
>N4649  
CUCCAACCUCAAAAUUAUAGACUCUGGGAACAGAAUACUGC  
>N4650  
ACUUGGGCUGCCCAUCAUGGACUAUGUGACAUUUAAUGUCC  
>N4651  
UCAUCACAGUCACCACAGAAACUAUUAGAUAUCCUCUAGGA  
>N4652  
UUUUGUCAAGUUGACAUAAAACUAACCAGUACAAUAUGAAU  
>N4653  
UAGCUGAAUUGGCUAGAAAGACUGGCUGGACUAGUGAGCAC  
>N4654  
UAGCUCAGGCUAUGUCUCAAACUUGC UUUGUCAGUGAGGCU  
>N4655  
UUUUGUCCCCUAUAACAGAGACUUUCCUUUUGACCUAACAU  
>N4656  
CAGUCUAUAGACUCUGCCAGACUGCUUAGGUCAUGUCUUGC  
>N4657  
AUGGUAGGACUUGAGAGAAGACUGACA UUGGAUGUUAGAAG  
>N4658  
GCUGAGGAGGCCAGGAUCAACUUUAAAGUGUGUGUGUGUG  
>N4659  
AAGAGACAUUCCCAUUCAAACUGCAAUAGCUCUUCACUGA  
>N4660  
GAAGUUACAGACUGUAAUGAACUGCUCCAUAUGGGUGCUGG  
>N4661  
AAGACAGGCAAUUGCUUUAACUACUGAGCUGUCUCUUGGA

>N4662  
ACUUUAAAAAAGGAGAUUGGACUCUUAAAUGUACACAUACA  
>N4663  
CGAGAAAAGCUGUACACCAGACUCUGAGACCAGACCAGCUG  
>N4664  
UGACAUUAAUUGGGCAGCCAAACUGUACUUCAGAAACCGCCU  
>N4665  
GCUUGCUCUAGAAGAGUUAGACUAUAUUGUCAACAUCUCCU  
>N4666  
AUGUUGGAAUGAGAGAAAGGACUUGGUGAAGCUGUCCUCUG  
>N4667  
CCACUGGCUACCCAGCACAGACUUGCUCUUGUUGAUCAAAG  
>N4668  
UCAUUGUUUAAUCCUUGAGGACUUUUUAUCAGGACAGGAUU  
>N4669  
CAGGUAUUUUGAAAUGUGGAACUUCAUAUUUAUAGUUUAGAU  
>N4670  
UGUACAACUGUCCAGUAAAACUGCCUCCUCCUAGGACUG  
>N4671  
GGGUCCAUUUGUGGAGGGAGACUGUAGAAUGGAAGAAGGGG  
>N4672  
CUGUAGAAUGGAAGAAGGGGACUGACUAAAUUGCAUCCCC  
>N4673  
GAAGGCUUUGGAUCCCUAGAACUGGAGCUUCAUAGUUGU  
>N4674  
AAGUCAUGAUGAAAGUCAAGACUCAGCUGUCCUCACCUGCC  
>N4675  
UAUUUAUAGAGCUGGGGUGAACUGCAGCUAUGUCUAUCUUA  
>N4676  
CUGCUUUUUACUGAAGAUGAACUUGCUCUUGAUGCCAUAGA  
>N4677  
UUGGCUUCGGUUCAGCUGAGACUGGUAGAAGACCCAGUAGU  
>N4678  
UUGCCGUUAGAUGCUUGGAACUGAACCCUAGUCCUCUAUA  
>N4679  
AAACUUUGGAGAAAGGUAGGACUAAGCUGCAGAAAUGGCUG  
>N4680  
GAAUCAUGCAGUCUUUUAAAACUUGGUAACUGUUAUGGAA  
>N4681  
UUAGAGAAACAACAACAAAAACUUUAGAUGAGUUUUACGU  
>N4682  
CAUAUUUCUGCCAAUUAAGACUAGAAGGGCACAACUUUUU  
>N4683  
UUUAGCUGAGAUCUCUAGGGACUUUGGUAUCCUUUCUCCAG  
>N4684  
CUGCCUUGAUAAUGGACUGAACUUCUCUGCACCUGUAAUCC  
>N4685  
AACCAGCUGAAAUUAUGUGGACUUUUGCAACCUCAAAGCCC



>N4686  
CACUUGGGUCCAUUCACAAGACUGGGAGUGGUUAUAAAAAAG  
>N4687  
UUUAUUUGUGAUAGUCAUAAAACUGGAAACAAUCUAGAUGUU  
>N4688  
CUUUUAUUUUUUGAGAUAGGACUUUACACUGUAGCCCGGAC  
>N4689  
AAAAGUGAUGAUCUAGAAGAACUUUCCCCCAGUUUGUCUUU  
>N4690  
UGGUUAGUUUCUAGUUUCAGACUAGUAUGAGGUAUGCUACU  
>N4691  
UAUAUUUUUAUUAUGCAAAAACUGAAACUCUUUGCUCAUUA  
>N4692  
UUGCCCUGAAAAGUUCAAAAACUGAUCUCUUUGGCUGGGCA  
>N4693  
UCAGAGUUUACAUAUUUUAAAACUCCACAUAUAAGUGAGGCC  
>N4694  
UGGUAUCCUGACAAUUGGAGACUGAAAAUGCCCCACUUCUU  
>N4695  
UCUAUCAGCAGACCUGGGAGACUAGCUCUAUCCUUAGUUUC  
>N4696  
AAAAAGAGUUGCAAUAAAAAACUAAACCUGAUACCAAUUC  
>N4697  
UGGUUUAACUGGAACAUGAGACUGCAACUCACAAAUCUUG  
>N4698  
AAUCCUCAGUGUUGCAUGAAACUGGAUUAGUGGAGUAUACA  
>N4699  
CACGAGUCUAAUAAAUUUAGACUAAUCAAGAACUCCAAUU  
>N4700  
AUCAGUUUUUUUGCCCCAAAACUAAGAGGCUGCAGACUCCC  
>N4701  
GGGUUACUCCUGGGAGGCAAACUGGGACUAAAAGACAGAA  
>N4702  
CUGGGACUAAAAGACAGAAACUAGGUGGUCGAGAGAAUA  
>N4703  
CGUGCAAGCACAUAGACUGAACUCUGAAUCCCUGCAGCCAG  
>N4704  
AGGCAGAGAGUGAUAGAGAAACUUACCAACACCCGCUUUUA  
>N4705  
CAGGGGUCUUCCUGUCUUGGACUAGCCAGCACACCUCUUU  
>N4706  
CCCUUUGUCUUAGCUCCAAACUUUGUCUCUGAAACUCCCU  
>N4707  
UUCUUUGUUGAGGGAAGAGAACUGCAGAGAAACCUCACAGA  
>N4708  
ACUAACCAGUACCCCCCGGAACUCGUGUCUCUAGCUGCAUA  
>N4709  
GAUAAGGAUGGAUACUGCAAACUACUCAAGGAAAAAUCUA

>N4710  
ACAUCCUCCAAUAAUACCAAACUUCCUAAUAGUGCCACUCC  
>N4711  
CAUGAGCCAACCAUAAUCAAACUACCACAUCCUCCAUGGGA  
>N4712  
CUCCUCUUGAUUUUAAUCAAACUGCCUUUCAUUUCUUUCCC  
>N4713  
AUCAGGGUCCUUUCCACAAAACUUUGCUGGCAUAUGCAAUA  
>N4714  
UUGUCAUAAUGACUGUCAAAAACUGAGGUGUGAUACACAAUU  
>N4715  
AUGUGUGCCCUGAAGAUUAAAACUCAGGCAUUAAGGCUUGGC  
>N4716  
GCUGGCAUGGACCGGCAGGGACUUGUGACCCUUGUCAGGCC  
>N4717  
GGUUUGUUGGGGUGCCCAGGACUGGCUGAGGUGGGCGUGCU  
>N4718  
GGAGGUGAGUCCUUUUGAAAACUCUAUGCCUCGGGAGUGCU  
>N4719  
GUGAGAGGGUGCGCCAGAGAACUGGACAGCUUCUGGGACAG  
>N4720  
GGUUGAGGACAUCAAGACGGACUUUAAUAAAUCACUAAAAG  
>N4721  
ACGGGAAACCAGCUGGGUAAAACUCCAAACUCUGCAUCUCCA  
>N4722  
AAAGCGAGCAAGCUAAUGAAAACUUGACUUUAAAAAUUUGUC  
>N4723  
CAUCUCCUUAAUAAAGAGGAAAACUUGUCCACAGAGGUAGA  
>N4724  
GAUUUGUCACACAUUGGCAGACUUAUAUUCUGAAUCUAAUC  
>N4725  
UCCUUUCACUUUCAUUGAGGACUGGGAUUAUAGGUCCAUGC  
>N4726  
UUGUUGACAAAUAGUGUUGGACUGACUUCUCUAUUUUGAGC  
>N4727  
UCAGCUAUUAAGAAGAAUGAACUUAUGAAAGUCCUAAGCAA  
>N4728  
CUGUGGGUAGUUGUUUAUGGACUGUUUACUGGUUUAGUAAA  
>N4729  
CACAAAGUUUUGCUAAAUAGACUGCUCAAAUGUGAGCUGAA  
>N4730  
UGGUGAGAACAGAUGGCGGGACUUGGUCUCUCCAUUUUUU  
>N4731  
CAGGCCAUAGGUUCACAUGGACUAAUAAAGAUGUGUUUUUA  
>N4732  
UGACAAAUGGGACCUCAUAGACUUGCAAAGCUUCUGAAAGG  
>N4733  
AGUACCUCUGAGCUCCUGGAACUAUACCACCAAUCAAGAA

>N4734  
UCUGCAUCACCAAAGUUCAAACUCAGAGUCUGUAUUAAGCU  
>N4735  
GGUUGGGCACUUUCCCCAGGACUUUUCAGGGCAGGAGGUAG  
>N4736  
UUACACUUAUUGGUAAUAAAGACUUUUUAGUCUCCUUUAUUA  
>N4737  
CUAUGAGUUUCCCCUAGGACUGCUUUCAUUGUGUCCCAU  
>N4738  
UCACAUUAAAUGAAUAAUAAACUUACUUUGUAAUCAUUUAA  
>N4739  
ACUUUUGUUUUGAGAUGAGACUGUGUGCUAGAUCCAUUUU  
>N4740  
UCGGCCUACCUGUCCCGGAGACUAUAUGUGGUCACCUGAAG  
>N4741  
UCUCCUCCCAUUGAUAAACAGACUAGGCCAUUCUCUGGUUAUA  
>N4742  
GGUGGUGAGUUUAACAAUAGACUAGCAUUGCAUCAGCGCAU  
>N4743  
CCAAAGUAUCCACGACAAAACUAAAUUCACCAUUAUCUC  
>N4744  
CUGCCUAAGACCUCUACAAGACUGGAUGCUGUAACAUUUUU  
>N4745  
UCUUUCAAGGUCUUUAAAAAACUGUGUUGGAAUUUUGAUGG  
>N4746  
CCCAGCGGAAGCUUUUAAGGACUCCAGAGUGCUCUCCAUGC  
>N4747  
GAAAGUCAUCCUUUAACAAAACUAGAAGAAGACAGUCACAA  
>N4748  
UUUAAAAAAUUAAAGGAUAAACUAUAUAGAGGAAUUAUUAU  
>N4749  
GUUCUUUUAUCCUUGAGAAGACUUUUUGCUAUCCUAGGUUU  
>N4750  
AUAGAUUCUCAUGCAGAUAGACUAAAACAUUCCAAAGGUUAU  
>N4751  
UGUUUUUGAGAUUGAUAAAGACUAAAACUACCGGUAACCAU  
>N4752  
CCACAGGCUCAUGUACUUGAACUCUUAGUACCCAGUUGUUG  
>N4753  
GGUGUGUUGGGAUGCCCUGGACUGGGCCAGUGGGAGUGCU  
>N4754  
UGGGAGGUGAUACUCUCAGAACUGAAAGAGAGGGACCUUAG  
>N4755  
AUACUUAUUCGCCAUGAUAGACUCUAAUCCAUCUUAACUG  
>N4756  
AAACUUAGUAAGUUCAUGGAACUAAUCAACUGUUUCAACA  
>N4757  
UUGUCAUCCUGGAAGAGAAAACUGGUUGAUGUUCUUCAUGC

>N4758  
GUCUACUCAAUUACUUUUAGACUGUAUAAGGAUGAGAUGAU  
>N4759  
CUGACUGCUGAAAGUUCUGAACUCGGCGGGGGAGUCGGUUC  
>N4760  
UCUCUGAAGGAACACUGUAGACUCAGAUAGUGUGCAAACC  
>N4761  
GGGCUUCCAGUUGUACAUAAGACUAAGUUUGAAGCUAAUACU  
>N4762  
UCCAUCCAUUUGUCUGCAAAACUUAGGGUGUCCUCAUUCUU  
>N4763  
UUUCUUAGCUCAAAGGUCAGACUUUGGAUCUAAUCAUUUCC  
>N4764  
ACAUACUUUUGUAUGAUUGAACUGACUUUGACUUACAUAU  
>N4765  
GUUUUUCAAUUUUAAACUGAACUGAGGUCACACUGAGCAUU  
>N4766  
UUUCCUGUAUAGAAUGAGAGACUGAGUAUAAAACAGACUUG  
>N4767  
GAAGCAGCAGAGCAGCCAGGACUCCGUACUACAGGCCUAUA  
>N4768  
UUCAUCUGGAAUAACAAAAACUUAGGAUAGCAAAACUCU  
>N4769  
GCUAGGGAGAAUAAACAGAACUCCUGAGGCUCAUUGGCCA  
>N4770  
UUUUGAUCUUAGCCAUUCGGACUGGUGUGAGAUGGAAUCUC  
>N4771  
AAGUUUUUAAUCUGCAAUGAACUACUCCCAGGAAUGAAGU  
>N4772  
CUCUGUGAUACUUUGGAUAGACUGCUAUAACUCUUUUCUAU  
>N4773  
GGAGGUGGAGGUUAUAGGGGACUUUCAGGAUAGCAUUUGAA  
>N4774  
GAGUGUAACAUGUAACAGGAACUGUGAGCUGAAUAAACCU  
>N4775  
UACUUGCCUUUAAAUGCUGAACUUCAGAUUUUAUUCUGUGGG  
>N4776  
ACAAAAAACAAAAACAAAAACUUCAGCUCUUACUACAAAA  
>N4777  
CUAAUCCACCAUACAAAUAAACUCAAGAAAAAAGAUCAC  
>N4778  
UAUUCAACUUGUUUCUUGAAACUGUUGCAGAAUGAAUAAA  
>N4779  
CUGUUGCAGAAUGAAUAAAACUGGAGAUUAGGAUUAGAC  
>N4780  
AUUUUUGAAUUCAUGUUAAAACUUAUAGAGCCUGCUUCAA  
>N4781  
AUUCCUAGGCAAUUGGUUGGACUUGGAGGGCAUUAUCCUGA

>N4782  
UUGAGGUCAUACAUGC UAAAACUAUGCCAGUGUGUCACACU  
>N4783  
AGGAUCUGUUCAUUGAUGAGACUGGGUGUGUUGAAGUCUCCC  
>N4784  
UGGCUUGGGUAUUCUGAAAAACUACUGGGUCACUGGGAAUA  
>N4785  
CUGAGAGGGGCGCUGAGAAAACUGUAAGCUUCCUGAUCUUC  
>N4786  
AGGGGUUGAGAAGUAUCCAGACUAGCACAGAAAGUAAUGGC  
>N4787  
GGGUGUUUGUGUACACACAGACUGUUUUUAUGUAAUUGAAA  
>N4788  
CCAGAAAUACUAAAGUGAAAACUUUGCAUUACUGGCACUAU  
>N4789  
AAUAAUAAUGGUGUAAAAGACUGUAGAAACUUGAACAAAU  
>N4790  
UGUUUGUAUGUUUCCUGAAACUCUAAGUGAGGUGUUGAUU  
>N4791  
AUAAUAAACCAUGUGUUGUGAACUUCUGAGUCUUGUCUAAUU  
>N4792  
CUAUCUAGUUC CAGCUGAGAACUGUUGAU AUGGGAGUUACU  
>N4793  
GCCUUUUCAUCUGAUUCAGAACUAUUAAGAACUGGCUCUU  
>N4794  
AUACA UUAAGAAUUC AAGAAACUUGAUAUCAAGAGAACAAG  
>N4795  
UCUAUGUUUGCCAUGCUCAGACUUGUUAGGAAGCCUUUCAC  
>N4796  
GGGUUUUGCCAUCUGCUGAGACUCGCAUAGCCUCCAGUUUG  
>N4797  
CAACUUUGUAGGU AUGUUGAACUUUUGUCAUGAACUGACUU  
>N4798  
UUCAUAUUGUAAUUCUUGGGACUUUGACUUCAUUUCCUCC  
>N4799  
AAGAAAUAUAAAUCUACUAAACUGUAAUCAAAUAAAAAUGC  
>N4800  
UGUUUGCAGAUUCUUGAAGGGACUAUUCGAAGAGAAAUAUCU  
>N4801  
GUAGGUUACAUACUUAGAGGACUACAAGGCCUACAGUAGUA  
>N4802  
UAAGGGGAUUUGUGUUCAGGACUCAUAGUUAACAUUUUGU  
>N4803  
CUGGGAAAAACUGCCUCCGAACUCCAUGAACAGAACUUCAC  
>N4804  
CCAAUUAAGCUGAAGAGAAAACUGGGAGUUCUAUUUUGUUC  
>N4805  
AGAGUGCUCUGAGCACUGAAACUCAGAGGAGAGAAUCUGUC

>N4806  
AGGUUUUAUGGAUUUUGAGGACUUUGGCAGAAGGUAGAAAA  
>N4807  
CCCCUCCCGACAAAACAUGGACUGAGGACUCUACUACUGA  
>N4808  
AAACACAAAGACUGGCAGGAACUGGGCAAUAAAACAACUGA  
>N4809  
CUAGCUCCCCUCCUAUGGGACUACUUUCUCAGCCCUGAUU  
>N4810  
UAAUCUGCAUGUGGCUUCGAAACUUUCUCCAGUUUAUAGUGA  
>N4811  
GACUGUGGAAGGACUUUGGAAACUUUGGGCUAAAAGAUCCAU  
>N4812  
UCCAGGGAAACCUGCCAAGACUGGCAAGCUAUUAUUUUUA  
>N4813  
CAUAUUUCAGAGCACAUUGAACUGGAUAGCAUUGCUGAGAA  
>N4814  
AAUGUAAAUCAACCAAUGAACUGCUAUGUUGC UAAA UUA  
>N4815  
GCAGCAGGCGCUGUUGGCAAACUUGC UAAGCAACGCAAGUU  
>N4816  
UUUCUGUAGGCAGUGCUGAGACUUUGGCUGCCCACAUGUCC  
>N4817  
AAGAAACAAAAAGAAAACAAACUACAAUAACAAAAAAACAA  
>N4818  
ACUCAUUGGAGCAUGGUCAAACUCCUGGGGGCCAGCCUCUU  
>N4819  
AGAAAGCUCUGGAAACCCAAACUCACCAGAAAUGCAAGACU  
>N4820  
AUCUCAGAU AAGUUUAUAAACUUGGUUAUAACA UUUUUUCA  
>N4821  
AUUUUCUGUUCUUGAAUCAACUACUUUAUGUCAAGAGAA  
>N4822  
CCUACCUAGUGACAAGAAGGACUAUGUGUGGAAGAUCUCCA  
>N4823  
UAGUCCUGCAAGUAGCAGAACUUGGCAGCUUCAGCCUUGU  
>N4824  
AUUGAUACUGGUUACCUGGAACUAGGAAAUUAACAGUGAUU  
>N4825  
ACACAUUAUCUGACUAAAGACUUCCAAGAUAAACAGAUGC  
>N4826  
GGUCCCUUUAGGAGGCAGGAACUGUAGUGUUUAAGUGAAUA  
>N4827  
AAGUCUGUUCAUUGAAGAGACUACAAUGAUACAGUAUAUU  
>N4828  
AACACUCCCAAGAUACUAAACUGGAGUAAUUUCAUAAAUC  
>N4829  
UUCUUAGGCAAUGGAUGGAACUAGGAAAUUAUCAUCCUGAG

>N4830  
UAAAAAUACCUUAUCAAGAAACUGUCAGGCCUGGAUGAAAC  
>N4831  
AGUUAUAAGGGGAUGUAUAAAACUAUGUGUAUAUAACAUAGU  
>N4832  
UAGUUAAGGCUACACGUGGGACUUGAUCUUUGAGAAAUAGA  
>N4833  
UAAAACACUCUCUCAAGGACUAAAUGCAUAGAUGGUAGA  
>N4834  
AUACUUCUUUAAAAGGAAAAACUUAUGUGGAAGAAGCCUAU  
>N4835  
CACUCACCAGCAGCAUCAAGACUUUGAGCCUCAAUUCUUAU  
>N4836  
CCAUGAAGUAAGACCAACAAACUCAGUGCUGCUGCUUCAUU  
>N4837  
UGUUUGAUGCUGCUAUUGAACUGAAUUGCUGGUAUCCUGA  
>N4838  
GACACUAACCAUAUUGAUAGACUUUAGAUACAAAUGGUAGA  
>N4839  
ACGUUUUAUAAUUUUGCAAACUUACACCUUUUAUACCAUUU  
>N4840  
AGAGAGAAGCAAUGCCUGGAACUGGGAACCUAGUCAACUAC  
>N4841  
AUCCCACACAGACUCAGGGAACUGAUCACUUUUAACACA  
>N4842  
AGGAUGCUGGGCAGCAAUAGACUAAGAUUCUUUCCGUUAC  
>N4843  
AUUGAUUUCAAAAUGUAAAAACUACAUUUUUAUAAUUUAGU  
>N4844  
AUACAAAAUAUCUUUAGGAACUUAUUUUGUAGAUUUCUUG  
>N4845  
AAUUUCCUACCUUCUGGUGAACUUACUGGUGAAAUGUAUUA  
>N4846  
AUUCUCCUCUGAAGAAACAGACUGGGAGGAAGAAGCAGCUC  
>N4847  
UUAUUCUGCUGAUCAGACAAACUACCAUUGGGGAGCUUAUG  
>N4848  
UUAUAAAACAGAAGAGGGGAACUUUUGAAGAGACUGUACCC  
>N4849  
UUUUUUACCACUAACUGGGAACUGGGUUUGGCCUUAUUCA  
>N4850  
CAGAUCCUUCGGGAAUUGAGACUUCAGGUCAACUCCACGCG  
>N4851  
ACACAAGUUUCAACCGGAGACUGGGUCUACAUGAGGAGGU  
>N4852  
UGUGGCCUGACACCCAACAGACUUUAAAGCAUUCAUACCCA  
>N4853  
UCCUGAUAAACCCACAAAAGACUCUCCUUAUCCCCCUAGAA

>N4854  
AAAUUUUUUUUCCAGAAACUAAGGUCUUUGAUUUUGU  
>N4855  
UGUGAAACAGGUGCCUCUAGACUCAGUGAGUAGAAAACAAC  
>N4856  
UAUAAACACAGACCUCUCAAAACUAGUGUUUCAUGGAUGGUU  
>N4857  
UGAAGGUAUCAGUAGCAAAAACUUACUAUUCUAAGUGGGC  
>N4858  
UCUUCAUGACACAAUGAAGAACUGUGCUAUGGUUUUAAGCA  
>N4859  
ACCUCUAUGAGACAGAAAAGACUGUGCAGGAAAGGAAAAAG  
>N4860  
ACACUACAGACUUUGAUUAAAACUACCUAUUAAAACAAGAAA  
>N4861  
AGAAGAAAACCCCUUCAAACUGAUUUGUUUAUUUCAGU  
>N4862  
AUUUUCAAUCUGUCAUAGAACUAGGUGCUAGUUUUACAUI  
>N4863  
UUUGACUCGCCCCAGUUGAAACUGCAACAUGGCUAAAGGUA  
>N4864  
CUGUGUCAAGUUGACACAAAACUAGCCAGUACAGGGGAUAA  
>N4865  
UGGUUGAGAAUUGGGCUAGGACUAAGCUGGAAUUAACAUI  
>N4866  
UACUUGAAAUGUAAUCUAAAACUCUAAUCUGCAGAUUUUAU  
>N4867  
GCACUGAUGGAUGAUGAAGAACUCUGAGGAAGAUCUUCCA  
>N4868  
UCCAGUAUCUUUAUAACUGAACUCAUUUUAGCAUGUGUGUG  
>N4869  
GCAUCAAAUCUGCAGACAAAACUUCAUAGCUUUUCCUACC  
>N4870  
GAGACACGAGCUCUGGAGGACUGGUUAGUUCAUAUUGGUG  
>N4871  
AAGUUGCUAUGGUUAAGAAAACUUGAUGUACCCUGGGUUGA  
>N4872  
UAAUGGCUGGUGCUCUGAAAACUGGAUUAAAAACUCUAUGC  
>N4873  
UGAGAAAGUAUUGUUAUUGAACUGGAUGUAAACGGAGUUUG  
>N4874  
AGGUGGUCUUGCCCUUGGAGACUUUCUGACUCAUAGUCCA  
>N4875  
GACAUUAUUGGAAACAGAAACUAAACAGAGACACAUGGAA  
>N4876  
CUAAACAGAGACACAUGGAAACUAACAUAAGUUAUGAAACA  
>N4877  
UGUUGAGAGAUAGAUUUAGACUAGAAAGGAUGGCUUCCUG



>N4878  
CAAGCAGCUUCUCAUGAGAAACUUCUCCCCUUUUUAACUGG  
>N4879  
ACCUCUUGGGGACCCGCCGAACUUAAGGAAAUUAGUCUGAAC  
>N4880  
AAAACCCGAGGAUAGCAAAAACUCUUCUCAAGGAUAAAAGA  
>N4881  
UGGAGGUGACCCUAGACUAGACUUCUAGCAGCAGGGGAUUAU  
>N4882  
CAUAAACAUUUAAAAUAAGACUCUGGUUCUGGCUCAUAGA  
>N4883  
CCAUGUCAGAUAGUCAUUAAACUAAUUUAUACUCAGUAAACA  
>N4884  
GUCAGAACUUAAUAAUCAUGGACUUAUAGUUCUGCAGUUAUAA  
>N4885  
CGAGAUCUCUCAGAGACUAGACUGUAUAGGUUGGGAGUGCU  
>N4886  
UCAAGGCAGUUUAUUCAGGAACUUAACAAUGUGCAGGAAAA  
>N4887  
AAAAGAAGGAGAAGAUAAAAACUAAGGACUCAUUUAAAAAA  
>N4888  
AGAACAUAACCAGCUACCAGAACUCCAGUGAGGUAGCCCAGC  
>N4889  
CUUAUCAGGUAUUAAUAAAAACUAUAAACUUACACCUGUAG  
>N4890  
UCAGCUAUGUAGAGAAUAAAACUGAAUGGGCUUUUUGGUA  
>N4891  
UUUCAAGUCUUCUCUCAAACUUCACAACCCAGUCUCUAC  
>N4892  
GUGCCACAUUCUUAAGAAAACUGCUCCCUUUACUAGAUCA  
>N4893  
CCUGAAGUAGGCUGAUCCAGACUUUGACCUUGGCUGCCACU  
>N4894  
ACUAUAAUGAUUGAAUGGAACUGGAAAUCAUGUCAAAAAU  
>N4895  
ACAAUACAUGUUUAAAAGGACUGUUGACUUGUACUCACUG  
>N4896  
AUGAGGCUCUGGUGAACAGGACUUGCCCUGAUGCUGAUAAU  
>N4897  
CUUUCAGAUGUUAAAGAUGGACUUUGGUAACCUGUGAAUU  
>N4898  
GCAAAGUGUCCACACUUUGGACUUCAUUCUUCUUGAGUUUC  
>N4899  
UGGCUCAUGUUGAUAGAAGAACUGAGACUUCAAAUCCAGUA  
>N4900  
CUCCACUGCUGGAAUUGCAAACUGGUCCAACCACUCUGGAA  
>N4901  
GCAUGUAGGGAAUUAUCUAGACUCAGUUAUCAAGAUGUGA

>N4902  
CCUUCAAUGAAUGCCACAAGACUCUUAGAAUAUCCUUAUCC  
>N4903  
AAACCAACUUGACUGAAGAAACUCUAAAAGCAAUUGCACUA  
>N4904  
CCUAGAUAAACAAGUGAAAGACUAAUAUGAUACAAAUAACA  
>N4905  
CCCAGGGACAAAAGAGGCAGACUCCAGACAGUCACCCAGAC  
>N4906  
GAAAUAUUUUUUAAAGUAAACUUA AAAAGGAGAAGACAAG  
>N4907  
GACAUAACAGGGCUAUCUGAACUGAGUCAACAACUCACAGA  
>N4908  
AACAU CAGAAGAAUGUGAGAACUCGGGGGCAGACCCAGCAU  
>N4909  
AAUCCAUCUGCUUUUGGAGGACUCCUGGGGAAAACAGCUCC  
>N4910  
AUUUAAAAAGUACCUGAGGACUGUGGAGAUGGACUAGUAG  
>N4911  
AACACAACAUUCUCAACACAGACUCCAAAAGAUAGAAGGAUC  
>N4912  
UCUGGGUCCUUUCAGCAAAAACUUGCUGUAGUGUAUGCAAUGG  
>N4913  
CCUCCUCUGUCACAAGGAGAACUGACAUGACCCCAUUGGC  
>N4914  
GAUUCUUUCCCUAAUUGAACUACCUGGUUACACCUCCA  
>N4915  
AGAGGUACAGAGGAUGAGGAACUUACCAACAUUUUAAUCAA  
>N4916  
UAACGCAUACUUAGCACUAGACUUCUGUUUGGAAUCUGGGA  
>N4917  
AGUUACUACAAAACAAAAGACUUCCUAAA AUUCUAAUUUU  
>N4918  
ACAUUUAAUUGUAAGCUGAACUUUACCCUUUCACAUUCAC  
>N4919  
AAGCAGGCGAAGGAGCAAGAACUAGAGCUAGACUCCCUUCU  
>N4920  
UGUCAUAAUGUACAAGGAAAACUGCUUGUUCAUCAUGUUGU  
>N4921  
AGACAGAAGUAAAUGAAAGACUAUGUGCUUUUAUAAUACUA  
>N4922  
ACCAUCCCAUCACUUGCAGACUACACAAAUCCUACCUCCU  
>N4923  
GAUGCUAUUCUGGCAUUGAAACUUGGAUGAGCAUGAAUUUU  
>N4924  
CAACAUAUUUUAAAGCUAAAACUUCCAUUUAUAUAGUAGGU  
>N4925  
CCACUGUGGUUAUCUUUAGAACUGUUUAUACUAUGAGCCA  
UU

>N4926  
UUGUGGCCUGUGUUGGGGAAACUGGUUGGGAGUCAUCUGGU  
>N4927  
CCGGGUAACAGUUUUAUGAACUGACCCAGAGUAUAAAGAG  
>N4928  
CUAUGUGGUGACUAAGGAAAACUCAUCCAUUGUGCUAGGCA  
>N4929  
UUCACCCUUUUAUGAUUGAACUAAUGAUGAACAUUCAGCA  
>N4930  
AUAAAAGAGAAGAACCCCAAACUUCUGCCAGGACUCUUCA  
>N4931  
ACUGUACAAGCUCAGGGCAAACUUCAUUUAAAAGGAAACU  
>N4932  
UGAGUAAGAGGAUUAAGCAAACUGGACUUAUUUGAAUAUCC  
>N4933  
CCAGGAUCUAAAUCCAAGGACUGUAUGAGUAAUUAACAA  
>N4934  
UCUGAAACCUCUUGACCUGGACUUUCAUAAUCUACAUUGCU  
>N4935  
AAUAUUACUUUGUCUACAGAACUUUGUCCAGGUCACCCGGU  
>N4936  
CCAUAUUUUUCAGUGUAGAAACUAGAAUGUAGCAUGGGGAU  
>N4937  
GAGAACAGAAGAAAAAGCAGACUAAGUCCAAGGAACUUUC  
>N4938  
UUUAAAUUCACUGAAUAAGAACUCUAAUUACAUCUUGGUA  
>N4939  
UAUAUUUAUUGAGAACAAAACUCAUGUAACUGUCCAAUGA  
>N4940  
AUUCCCUGAACUUCAAAUAGACUUGUACAACAUCAGUACAU  
>N4941  
CAAUAGCUAAGAAAUCAAAACUGAAAUAUACAAUUUUGA  
>N4942  
UAUGUAAAGGCAAUAAGGGACUGGAGAGUUUAUAAACACA  
>N4943  
UAAGAAUGCUGGAAAUUUAACUGCUUUGGAUGUACUUCUU  
>N4944  
CACUCCUGAGAUGACCCAAGACUGUCAGAUGGCUCAGGCAC  
>N4945  
CUGCUAUCAUUGGCAGUAAGACUUAUAGAAUUUCUAUUUUU  
>N4946  
AUGGAAUAAAAGAAGAAAGACUUGGUAAAUUUACCCUAU  
>N4947  
GCCAGCCUGAGAUUAUGAGACUCUUACUCAAGAAAAAUUA  
>N4948  
UGGGUUGUAUAAAAAAGCAAACUGAUUAAGCCACAGAGAAC  
>N4949  
CCUUGUCAGGUGCUGAUAGAACUUCUCAGGGAACAGCAAUA

>N4950  
UGAGGGUUUAAUUUGUGAAAAACUUUAUGCUCAAUUUUGGAG  
>N4951  
CUUAGGCCUAAUUCUCCUGAACUAUCAGUUUGCCACCCAUC  
>N4952  
UCUUGUCUUCAUGAUAAUUGGACUGAAUCUCAGCAUCUGCAA  
>N4953  
ACAAAAAAGUGGAGCAGAAACUAAAAUAAGGACCAGCUAG  
>N4954  
AUUGAAUUGUAUUUUUAAAACUCUUUAGGUUUAUCUACA  
>N4955  
UGGCUUAUGAAAGGUGAAGAACUGGUUUUUCUCUAGGUCCU  
>N4956  
AAUUUGUUAUUACCUUGUAAACUUUGAAAUUAAUUAUGCAG  
>N4957  
GCCUCCAUGGUGAUGAUGGACUAAACCUCUGAAGCUAAAA  
>N4958  
UUCUUCAUCCAGUCAUCAAAACUGUGUUUCUUUGUUGAAUA  
>N4959  
UCCAGGCAUGAUGAGAAUGGACUAAAUCUCUCUAAGACAGC  
>N4960  
GACUCUAAUAUCCACUAAACUAGUGUGUUACAUAUUUA  
>N4961  
UGAGAAUAAAUAUUCUGAAGACUCCUCCUCAAGUUUCACA  
>N4962  
CAUAUACAGUCAUUCUCAGACUUUGUGCUAAUUGCCCGGA  
>N4963  
UGGUCUCUUUCCAAAGGGAAACUGCAUUAACCAAUACAAGA  
>N4964  
UAUCAUCUUGCUAAGUGCAGACUAGGAAAUAAUUAUAAAUG  
>N4965  
ACCGCAAGCCCAGGAGUGGAACUCCCCACAGUGAGCUGGAA  
>N4966  
ACUUAUGUCAAGUUGAUAAAACUAACCAGCACACCUCUCUU  
>N4967  
CUGGUAAAGGUUCAGUUAAACUGGCACUUUCAACAUCUGA  
>N4968  
UAUAAGUGUAUAUACAAAAGACUAAAGGAGAAAUAACGAUG  
>N4969  
UACCAGAUGUAGUGCUGAGGACUGAACCUGGAUAUUGUGA  
>N4970  
CCUGCAAUAGAAUGCCUUGAACUACCUGCCAGUCCAGAUU  
>N4971  
ACCUAAAUCUAAAACAUAAAACUGUUAAAAGUCUUAGAAGAC  
>N4972  
AAAAAAAAGGUGUAUAGAACUAAACUGAGAUUUCACAAC  
>N4973  
CACAGGCUUGAGGAUCACAAACUAUGUUUAAUAUGUAUGG

>N4974  
CAUAUCUUGUGCUACAGUGGACUCAGACUUUGGGGUAGCC  
>N4975  
UUUCUUCACUAUAAAUUAGAACUUGAGACUAAUCACUGCUG  
>N4976  
GGAUUUGGUAAGACAACAAGACUGUUGGCAUUAAGUCGCUU  
>N4977  
CUGGACUGCAGGAUGCAGGGACUGAAUAUGCUAGGCCAGGA  
>N4978  
UCCAGUUUAUUAUUAGUAAACUAAGACAUGCAAGAGCCUA  
>N4979  
AUUUGCACUGGAUAAUAGAAACUGGAGAACAGACAUGUUUU  
>N4980  
GCUAUACUUAUAGAUAUAGACUAGCAUAACUGUCUUCUGA  
>N4981  
ACAAUUUCUUGAGGAAUAAAACUUAUUAAGUCACUUGGGUA  
>N4982  
GAAUAAAAGUUAUGCCAAGGACUCAAAUUUCUCAGAAUAA  
>N4983  
CACCCAAAC AUGCCAGAAAAACUAGAUAAUAACCUAAAAUC  
>N4984  
UCUGCAGGAGGCAAUCUGAACUCCAGAUUCUGUGCACCA  
>N4985  
GGGAUGAGAAACUCUAAGGACUCA AUGGGAGUGACCUUAG  
>N4986  
GAACCUCACACAGAUUGAAAACUAAUUCUAUUUAUUGCCUU  
>N4987  
UCCUCAUUCGGAACCAGAACUGCGGGUCACGGUAAUAAA  
>N4988  
AGAAGAGGGGAAUUGAGGAGACUCUACCUCGAGUACCAAGA  
>N4989  
ACAUAGCUGUCUUCUAAGAAACUCUGCCAGAGCUUGACAAA  
>N4990  
GUUCACUGGAAGAUUUUCAGACUGUAGUGAUUUAAAACAAA  
>N4991  
UUGGAAGUUACUAGUUUAAAACUGUCUCUACUAUACCGGAG  
>N4992  
UGAAUCUAUUUCAGUGGCAAACUAACAAUCGAAAAAUUGAU  
>N4993  
GUAUAAAAGUAUUAUUAGACUUGUCACAAAAUCUAUCC  
>N4994  
UCUGAAUGCAAUGCCAGUAGACUGUUGUUACUAUGUGUCAU  
>N4995  
UAACAAAACUAAACCAACAGACUACAUUCUAAAUAAGCAA  
>N4996  
CAUUCAUAUACAUUUAAGAACUGGAUAGUUUCGUCUAUUA  
>N4997  
AAUUGAAGAUUCAGAAAUGAACUCACACACCUAUGGUCACU

>N4998  
UUCCUGGUACUUAUAGAGAACUUUCUUGUAGCAUCUUUAU  
>N4999  
AUAGGGUUCUUAUACAAAGAACUUCACAAACCACAAGUUA  
>N5000  
AAGAAAGAAUACACAAACAGACUAAUGGAAAGCCUUUACAG  
>N5001  
GCUUCUGACCUUCAGGCUAAACUCCUCCCCAGUUACUUAGC  
>N5002  
AAGUCCACAUACAUGUGGAAACUGAACACCACUCUACUCAA  
>N5003  
GAGUCCCCUUUGUCUUGAAAACUUUAUAUGUCCCAGUAUAG  
>N5004  
UUGAUUAUGAUGAUAAUAAAACUGGAUUAUAAAUCAAGUC  
>N5005  
AAUCAAGAAAGUAAUCCUAAACUCCUAAACAUGAUAAACAG  
>N5006  
UACAGUAUUUGACAAAUAGAACUUGAAGACAUAUAAAGACCC  
>N5007  
UACUAUAAGUAUUAAGUAGAACUGUAUAUCUGGCUCCAUA  
>N5008  
CAAAAUCCUUAGGACCUGAACUGUGGAAUCUGACAUAGCA  
>N5009  
UUGUGCCUCCGAGAUGUUAGACUUAACGCUAAAUAAGUUGCA  
>N5010  
GAAGGUUUUAUGUUGAUAGAACUGACCUCUGUUCACAAU  
>N5011  
CUUCAUUGCCUGCUCUUGGGACUCUGUUCUCUCACUGAGU  
>N5012  
AUCAUCAUGAUUGAAUCUAAACUAUAAUAAGUAAGUGAGCA  
>N5013  
CUGGAACCAUAAUAAAUGAGACUCUAUUUUUUUUUAAGA  
>N5014  
CCUAAUAAAAGACACUGAAGACUUCACUCCCAAACUCAUAC  
>N5015  
GGGGACAUAGGCACGUAGAACUUGAGAAAUGACAGAUCAU  
>N5016  
GGCAUAUGGCAGAGGUGAAGACUGACUAUCAUGGCAGCUGC  
>N5017  
GGCUGAUGAAACUCUUUUGAACUAGAUAGUAAGAGUGUUG  
>N5018  
GGGUACAAUGUGUGUUUGGAACUUUAGUAAAGUUUCUAAU  
>N5019  
AAUGUCCUUGAUCCACUUGAACUUGGGCUUAACCAAGGAGA  
>N5020  
CAUGUCUUAACUAUAAAUAGACUGGGAGACGGAGGCAUAC  
>N5021  
AGAUGACAAUGAUGGGAAAAACUUGC UUAAGCUUUCACAUC

>N5022  
AGAGUACUCUGAACACUGAAACUCAGGAGAAACCUAGCAUC  
>N5023  
GAAAUAAUAGAAGAGUGGGACUCUAUUUUCAGGAGUCAA  
>N5024  
UGUUUUUUUAAGAAAGAAAACUGCUGGAAUGGAAAAUAUA  
>N5025  
CAGAAAAGGCCUGCACAGAAACUGUGGAAACUAUUAAUUCU  
>N5026  
AAGAAUGACCCCUUUAAGAACUUGAGAAGGGAAGAUAGUU  
>N5027  
ACCAGUCAGAAUAGAUUAAGACUGAAUCUAAAAGGUCCA  
>N5028  
AAGCAAGGGGAAUGUAUCAGACUAAUAUGAAAAUGGAGUA  
>N5029  
GCUAGGUAUGGCUUCCAUAAGACUCCUAUGUGUGAACAAACC  
>N5030  
CCCUAGACAUUGCCUGAAAAACUCAACAAGAUUAUAAAU  
>N5031  
AAAUUAAACAUAUUGAGAGAACUAAUGAAGUGGACAGCAU  
>N5032  
AAUAUUCCAAUGUAUUUAGACUAAAUAUGUUUCAAUA  
>N5033  
UGUUAAGAAAGACACACUGAACUUAUAAGACAGACCAGUU  
>N5034  
GAUGCCUUUGAAUUCUGUGAACUGAUUUGCACUGCUCUGAG  
>N5035  
GCUCUUCUCUUCUGGAUAGAACUUUACGUACCAUAUCGUGU  
>N5036  
AUUAAGAUUGUUCUCCACAAACUGAUAGCAAGUGCCUAUU  
>N5037  
AUGCAAAACAAUUGAUCAGGACUCUUCACUUAUUCCAAAA  
>N5038  
AGCCCCAAAAGUUUAGUAGACUGUGAAGCAAUUGGUUUU  
>N5039  
CACAACCUUAAAGAACACAGACUCUCUUUUCAGAAGAGUUA  
>N5040  
AGUCAGUGCUACAUAAGGAAACUCUUUCUAAAAACAAAA  
>N5041  
GAUCACAGGAUGGCAUCAGAACUCCAGGAACUUGCAUAGCA  
>N5042  
GAAGAGAAAUUGAACUUUAGACUUUUAACACAGUUGAGACU  
>N5043  
GAACUUGAGUAUGGUAGCAAACUCCACAAUAAAAUAGUUA  
>N5044  
AUCAUUGGGUCCAUCAGAAAACUAAUCUUCUGGAAAACCGC  
>N5045  
UGGAUCUUAACACCUAAGAACUGAGCUAAAAACAUAUAAG

>N5046  
AUAAGAUAAAUAUAAGAAAACUACAAAACUGACAAUCACA  
>N5047  
UUUCCUUUGGAGCAAUCAAACUCUCCCUUUUCUCCUUGAA  
>N5048  
GAGACUUACCCACAUCUAAAACUCAAAUCAACUAAUUUUUG  
>N5049  
GAGGAAAGAUCAGGAGAUAAACUGAAAAGAAAAAAAAAAAA  
>N5050  
UCAAUACUCCAUGGCAUCAGACUUAUUUAAGCUCAUGGCUA  
>N5051  
CUCAUCUUUGGAGUUUCGAGACUAUGCAACACUGGCACUUU  
>N5052  
UGAAAGCCUCUCAUAUUUGGACUAUAAGCUAAAGACAAAGG  
>N5053  
CACAUUUUGUUUUGGAAAAACUGGAUAGAAUAGUGUCUAG  
>N5054  
CCCUAAGUACCGAUGGGAGGACUGAAAACAAGUACCAGCA  
>N5055  
AAUUAUAAUAGCUGUAUGGGACUAAGAUAGUGUCUUAGUUA  
>N5056  
UUACUGAAUUGCCUUUCUAAAACUCAUCCUACACAGUACAAG  
>N5057  
UCAGGAUUCAGCCUGCUCAAACUUCUCCAACCUUGUUUC  
>N5058  
CCUAAUCUGACAGGCUUUAAAACUGACAUUACAAAGUUCACC  
>N5059  
AGGUGAAGGAAUUGAACAAAACUAUCCAGGAUCUAAAAAUG  
>N5060  
CAUGAUCAAAGUGGGGAAAAACUGUUUUUGUUUUGUUUUGU  
>N5061  
GACCUGAUUUUAUGUUGGAAACUGUAAAUGUCCAUAAGCA  
>N5062  
AAUGUUGAAAAGUUCUGGAAACUUCUAAUAGAAAACUUGUC  
>N5063  
CUUUUAAAGGCUUGAAUUAAAACUUUCCUGUGUGGAAGGGGU  
>N5064  
UAGAUUCUAGCAGCAUGGAAACUAGGCAGUUGCUCAGCUAU  
>N5065  
CAUUCAUUUGGCAACAUAAAAACUUGAGGCAGGAAACAACCA  
>N5066  
CUCUGUUUCUCCGGAUCAAAACUGCCAUUGCUCAUUGCUGU  
>N5067  
GCUAGACUGGAUGACCACAGACUUUGUGGAUGGCUCUAUGC  
>N5068  
AGCUGGGGAUCUUCCUUGAACUAUGCUCAGUGCUUCUCCA  
>N5069  
UUCACCUUUAAAUAAGUAAAACUAAUUACAUAAGGGCAGUUA



>N5070  
UCCUCUGUUUGACACAGAAGACUCAUUCAAACAUAAGUGAC  
>N5071  
GCCUCAUAUCCAUAUAUAGAACUCUCAGUCCUUCUCCAUG  
>N5072  
GAAAUACCAGGUCCUUUGGACUUUCCGUGACGCACGAAG  
>N5073  
UGGUUCGCCUGCCCUGCAAACUCUCUGACAUACAGUAUGA  
>N5074  
UUGAAUACUUAUGAAAAGAACUUUCAGGAAAGUUUGGAUG  
>N5075  
UGAGUGUAUGAAGCACUAGACUUAUUCUAUGUGAUUUA  
>N5076  
CUCAGAGCUAAGGACUGAAGACUCUCUGCAUCACAGGGAU  
>N5077  
GUUCCAUUGUCCAGCCUGAAACUGUUAACUGGAAGUCUGAC  
>N5078  
UACAACAUAAUAAUGAGAGACUUACAAACCCACACUCACC  
>N5079  
CAAAGAAAGUUUCCGUCCAAACUCCCUUAUGAAUAUUGAUG  
>N5080  
CUGUAGGGGGCAUCGCUCAGACUAGCUGGAGAUUUCAGACU  
>N5081  
GAACUUGGAUAAUGAUUAAAACUAUCAGAUUUCAGGGUCUA  
>N5082  
UACCCAAGGAGCUAAAGGGAACUGCAACCCUAUAUGUGGAA  
>N5083  
CUUGACAAUAUUUGGAAUGAACUACAAUCCGGAAUUGGAAG  
>N5084  
UCGCCUGCUUGCUGCGUGAGACUGAGUAACUGCUAGAUCU  
>N5085  
CAAAGAAAACACAGGGUGGGACUCAUGGCUCUAGCUGCAUA  
>N5086  
UCUCAGGGGUGCAGGGGUAGACUGACAUAUGGAAAUCUGUC  
>N5087  
AUUUUAUAUAGUACCUUUAACUGUUUAAAUAUAAAUAUU  
>N5088  
UCUCUUGGUUAUAGCUUGAAAACUGCCGGGCAGGAGAAGUA  
>N5089  
UGUGUAAGUGUUGGAAUAAGACUUUAAUUCCAAUCCAAGG  
>N5090  
UGUAAAUGCAUCCAUGGAAACUAAAGGUUAUAGAGGCUAU  
>N5091  
UGUAGAUGCCUGAAUCUAGACUUCUCAGCUCUAAAUCUCU  
>N5092  
GACAUAGAACUAGAAAGAAGACUAUAAGAAAGAGGAAGAGA  
>N5093  
AUUAGGACCUGUCUUAUUAACUUUUGUGCAUGUACAGGUA

>N5094  
GACAGAUUAUGUAUCUAAAACUGAUAGACUCAAAAUACAA  
>N5095  
GGGCAGUGUUUUUGCCUGAGACUGAGCAAAGGGGAGAAUGA  
>N5096  
CCAUGGCUCUCCACUGUGAAACUCAAUGAAAAGAGCCAGUC  
>N5097  
AAUAGAAGUGUUUAUAGAAGGACUACAUUGUUAGUGAUUCUU  
>N5098  
AAUUAUGACAGGCUGCAAACUGGCAGUUUAGGAGACUAG  
>N5099  
AAUGGUCAGUGAUAAUGCAAACUUUGAAACUGGGUUGUCUG  
>N5100  
UGC UUACAGCCAACCAUUGGACUGAACAUGGAGACCCCAAU  
>N5101  
GAUAUGAAUUAUAAAGCAAACUAUCUUAUUAUCUUCCUC  
>N5102  
UCAUUCUAACUCUUUUCAAAACUACCCCAUUCUUUUCACC  
>N5103  
AAUUUAAAUAGCAAUAAGAAACUAGAUAAUUUGGCUAAAAA  
>N5104  
UCAUAUACAAAGCUUUUAAAACUUAUUAUUAUAAAACUUGA  
>N5105  
AGACAUUUGGUUGAUAAUAAAACUUGAAGUAUUUGUCCUUG  
>N5106  
UACUUCUUAAGAUAGUAAAACUGUGUUAAGCAAUGACUA  
>N5107  
GUCUUUAUGAUCUAGCUGGAACUAGCUAUGCAAUCUACAAC  
>N5108  
ACAGUCCAUAUCAGUACAGACUCAUAGGACCACCAUGGUA  
>N5109  
CCAAAUACAGAAAAAUUCAGACUUACUCUCUAAGAAAGGAU  
>N5110  
UACACAAAGUUGGGUAUAAGACUUUGAUGAAUUUUGAUUGU  
>N5111  
UUACCUGAGGAUUAGUUGGGACUUUAACUCUCAUCUGCAAG  
>N5112  
GAGAUACACUGUGCUCAUAAAACUGAAAAGUAACAUUAGCU  
>N5113  
UCCAGGUUCUAUGACAUGAACUAUCACAGUUCAGUGAACU  
>N5114  
GGAGAUCUCAGUGUUGUAGAACUUUCUGCAUUUGUGGCCAA  
>N5115  
GUCACUGUGAGGAUCUGAACUCAGAACUCAGAUUCUUCUA  
>N5116  
AAAAACAAAAAUGGUUAAAACUUUAUCUGCUGGCUUUUCU  
>N5117  
UUUAAAUUUGAACAAUCAAAACUUUAAGUUGUAUUAUAAUA

>N5118  
CUUACAAACAAGAUGAAGAAACUUCCUAUCUCUGCCAUGGG  
>N5119  
ACAGACUCUCUUACUUCAGGACUGUGUACAUGACACUUAUC  
>N5120  
GAGAUUAAUAGAACUACAAAACUAUGCAAUAAAAAAGAGUG  
>N5121  
GAGAAUUGCUUUCUUAGCAAACUACAGAUUUUGCCCCAGCC  
>N5122  
GGUUCUCUUAAGUGAUUGAAACUGAUACAACAGAUUAGUAU  
>N5123  
UUUUUAGACCAGAAUUUGGAAACUGAAUAAUUAUCCUGGCUC  
>N5124  
UGAAAAUUAUGACUCUAAAAACUCUACUGGGUGGACAUGUC  
>N5125  
AUUCAUUACUUACUCAGAAAACUUUGAUAAAAGUUUCUCUU  
>N5126  
CACCCUAAAAGGACAGGUGAACUAUUGCACACUUGCACAAU  
>N5127  
GUUGUAUCCACUCAUAAUGGACUGGACGCUCCUCUAUACAU  
>N5128  
UUGAGUCCAAGUGACAAAGAACUAGCCAGCACACUAUCUAU  
>N5129  
AUUGCUCACAGGUGCACAAGACUCACAUAAGCAAAAUUCAG  
>N5130  
AACUGGUUAAGAGCCAAAGAACUGGUUACAAAGUGACAGCU  
>N5131  
AAAGGUGUUUACUAAGCAAGACUGACAUCUUACUUCAGUGU  
>N5132  
GUACUAAUUAUUUUUCAAGGACUAUCACCCAAUUAAGAUUAA  
>N5133  
AAUCCAUGUUUGUAAAGAAAACUAAACAUCUGGAAAGUUGA  
>N5134  
AUGUGCAAAGAAAUACAAAAACUAAAUGAUUUGAUCAUGUA  
>N5135  
GAGAGGGGCUGUGGUACAAAACUCCAGGUCAUCUCAGCCCU  
>N5136  
AAAUUUAAAAUCCCUACAAACUAACAGAUUAAGUGAGAAA  
>N5137  
GCUUACUGGCUCAUUUAAGAACUGGAAAUAAGCUGGGCGU  
>N5138  
AACACAGCUCACUAUUUAGACUUAUGGCCACUCUAUAAC  
>N5139  
UAUAAAAUAGAAGAUUAAAAACUAUUUGUCUAGUUCAAAGU  
>N5140  
AAAAAAUUGAUACAAAAGAACUUGGGAAAAGAUGACUAAA  
>N5141  
UAGAAGACAUCUCACAGCAAACUCCCUGAUUUCUGGCUCU

>N5142  
UGAUUGAAAGUAAAACUAAAACUAUUUCUGGCAUUUAUAAA  
>N5143  
GGGCCAUUAAUCCUGUGGAGACUGGAUGUCCCAGUUCAGGU  
>N5144  
CAUCCACUGGAGCACAGGAAACUUCCCAGUGGGAGGACUCU  
>N5145  
AUUAAUUAGGCACUUGUAGGACUUGAGAGAAGGAACACAGC  
>N5146  
AACGUUCAGAAAAAGGCCAGACUGAAACUCACAAAAAGCAU  
>N5147  
UACCUCUAAUGAAUGUCAAGACUAAGACUCCUGAACACUAU  
>N5148  
CCAAAGUAAAGGAAGCAUGGACUCUGAUCUUUAAUGUUAGA  
>N5149  
UUACUACACUCAGACAGUAAACUCAAGCUCAGUAAGACUGA  
>N5150  
AUAGUGUCUGGAGUUUAUGGACUUUUUAUGGAAGAAUAAUAA  
>N5151  
GAUCCACAGGAAGAGAAAAAACUGGUCCUAGCCUGGGCUAU  
>N5152  
UUUACCAUAUGCUAUGCAAAACUGACAGUAUUUACCUUUGG  
>N5153  
CCAGGAUAUAUAUCAAUAAAACUGAAGCAUUUUGUCUGGAU  
>N5154  
GAAACUUUUAAAAGAUCAAACUUUCAGGAAAGUAGAGGAU  
>N5155  
CUUGACAUCAACUGCUAGAAACUAUGAGGAGGAGAAGGGAA  
>N5156  
AUUUUAUACAGCACUGGUGAGACUGCAAACUGUUGUGGGCAC  
>N5157  
GCUAAAUAAGUAAAAGGAUAAACUCUGAUCAUGACUCAGUUU  
>N5158  
AUACAGACCAUAAAAGGGAAACUCUACAGUACUUUUCUGCU  
>N5159  
CCUCCCUUGCAGAUUAUGAAACUUGGGAGGGCACCUUGACU  
>N5160  
AAAGGAGUGGAGAUCUGAAGACUGCUUUGACAUCAGCCAUG  
>N5161  
CUUGCACAUUAUUCUUCUAGACUUAGGUGAUGGUUCAUGUC  
>N5162  
AAUGCAUAUGGACCCAUAUAGACUCAUAUUUGAUC AUGGUUA  
>N5163  
UUAUCCAAGAGAAAGUAGAACUCAUAAAUAAAUGUAUAA  
>N5164  
GAAACAAGCAGCCUCAUGGGACUGGGCAGCUACUAGAUUAC  
>N5165  
AGGACCGGGACAACUUGAAAACUGCUUAAUAACAAAUAACA

>N5166  
UUUGUGUGCAUGCUCUAGGACUGUCCAAUACCUCUAAAA  
>N5167  
GACCAUAAAACACCACUGAAACUAUUUACUUGUUUGUUUGU  
>N5168  
CAGACAAACAAACAUUAUAAAACUGUAAACUUUUAACUCCA  
>N5169  
GAACUUGCAGUGUAAGCAAAACUUGCUGGCCACUAAACUAU  
>N5170  
AGAUACAUGAACACUAAUGGACUGGAAGAGAAAAGAAAAUU  
>N5171  
AUACUACUAUACCCAGUAAAACUCUCAAUACACUGUUAUGG  
>N5172  
UAGAAAACACUAUACAGAAAACUCCAAAGAAAGAAAAUAA  
>N5173  
UUUUGUGUCUUUGUUGAAGAACUUCAGAUUUAUGUCAAUGA  
>N5174  
GGAGAUUGAAAUAUUUCAGACUGAGUCAGUGGGGUGUCAU  
>N5175  
UAGAAAUGAUUCCAGGAGAACUGCCUUGUUCACAGUCAU  
>N5176  
CAUUAACCUGACCUGGUCAAACUGUGGUCUAGCUAAUCCCA  
>N5177  
GAAUUGCAUGUGUCUAGUAAACUAAAUAACUCCAAUGUCC  
>N5178  
UUUGUGGUGGGAAUUGAACUUAUGACCUCAUAAUUUU  
>N5179  
GGCAUUUGUUCAGCACGGAACUAUAAGGCAAGUAGUCUAC  
>N5180  
UACACAUUCUUAGAAGAAAGACUUGUGGAAGCUAUUCACGU  
>N5181  
AAAGAGGCCAUGAAUUUAAAACUAAAUGAGAGGAUAUAUGA  
>N5182  
GAGGACAUUGGUUAGAGGGGACUGUGCUAUCUUCACAUAAA  
>N5183  
AUACUGUGGAGGUUAUUCAAACUCCUUUCUGUGUUAUGCUU  
>N5184  
AGAGCUUCUCCAACCCUCAGACUUAGAACACUGUGUGUGUG  
>N5185  
GAUUGUAGGAAAUCAAAGGACUCAAGUAACAGCCAUUCUU  
>N5186  
CUGUGACAACUGAAAUCGAGACUGAGACAAUUUUUACAAAG  
>N5187  
CAAUACAUCUAUCUUAAAACUUUAAAACCACUUUAGCCA  
>N5188  
ACAUCGCAAUGUGGUUUAAAACUUUGACUCAAUUAUACUU  
>N5189  
UCUAGGCAGAGCAAUAAGAGACUAAAGAAGAUCAAGGGGAU

>N5190  
UCA AUG AAA UCC CAUG AAA ACUCCAACACAAUUUUUAUAG  
>N5191  
GGAAGUACCUCGCCUUGCAGACUUGAAGUGCCAGGGUGAGA  
>N5192  
AGCUAUUUUAAAAGGAGAAAACUGAGGACUAAAUGUCACAU  
>N5193  
UAGCAGAGCCUGAAGGAAAGACUUUCCAGUGACCAGCUCAA  
>N5194  
AAAAAGUAAAAGAAUGAAAAACUCAACACGGCUCUCCUGUUU  
>N5195  
AUCCCAUAAUCAGCCUCCAAACUCUGACACCAUUGCAUACA  
>N5196  
AAUAAUCACAGCUCAGCCAGACUUCCCAUGUCUCCCUUUAU  
>N5197  
UCAAAACUGAUCAAACCUGAACUACCAGAUUGGCUAUAAAU  
>N5198  
AACUGCUUGUUGUGUUUAUAAACUAGAAAGUGGAAAGCUUCA  
>N5199  
UGCCACUUUAUUGAUAAAAGAACUAAUAAAGAUUCUUGGUUA  
>N5200  
CUAAAUAGAUGAAUGCAUGAACUCUCUCCUGUACAGAAAU  
>N5201  
AAGUUUGGGACAAAAGCAGGACUAUCAUCCAUGAAAACAA  
>N5202  
UCAGCAUGGUCCAUGAACAGACUAGACUCCAAUAAAGAAGA  
>N5203  
AAUGCAUAAAAUGAUAAAAACUAUCAACAUAAACAAAUUU  
>N5204  
AAUUAUAGAGCAUGAAACAAACUAGAUCUAUACAGUACACA  
>N5205  
UACAGUUUGCAUUGAAAUGAACUCAUGAAACUAUGUUAGUA  
>N5206  
GGCCAGCAUUGUAAAGAGAACUAAGACUCCAAAAACCAC  
>N5207  
AAAACAAAACAGUUGUUGGGACUAAGUUGUAGCUCAGUAGU  
>N5208  
AUCAAAUUUUUGAUAACAGACUAAACAAUUUUGAAAUGAG  
>N5209  
AAUAUUGGAUUUAACAAAGAACUUUAAAUAACCUAGGAAGCU  
>N5210  
UUUCCUCUUUUUCUGUAAGGACUUCUACCUGUUUGAUUGUG  
>N5211  
UUUCCUGUUUUUCUCUAAGGACUUGUAACUCUUUAGCAGUG  
>N5212  
UCAGGGAAUGCAAUCAAACUCCUUUGAGAAUUCAUGUU  
>N5213  
AGUAAUUCUGAUUUGUCAAGACUAGAGAUAGUACAUUUUA

>N5214  
CUGCCUGCCCGUCAUGAUGGACUGUAAUCUGUAAAUGAAA  
>N5215  
AUGGUAACUAGUAAUAGAAAACUUAACUGGAAGACUAGAAC  
>N5216  
ACAAUCUGACAAUACAGGAAACUGAUUAUCUAAAACAAAUA  
>N5217  
CUGCUAUCUUCUCCUCUUGAACUUUUCUCCUCAUGGCCUCA  
>N5218  
AGAUUCCAGGGUGGGUUGGAACUCAGAGGGAAUCCCCUCU  
>N5219  
AAAUA AAAACCAUGCCAUA AACUAAAGGAACAAUUAUCCA  
>N5220  
CCAAUUUCUUAACUGUAAAACUCCAACUGCAUCGUUAUA  
>N5221  
UAAGAGAGACAGCAAAUAGGACUGGUUAUUCACUGGCCUAUU  
>N5222  
UUGUCAUUUGCUUGCUAUAAACUGGGUGGCACCAGAGACCU  
>N5223  
GGCACAAACUAUUCAGAUAGACUCUGUCAUUUCUGCAAACA  
>N5224  
UACACAACUCAUAGCCAAGACUAAUCUUCCAUUCUUAUU  
>N5225  
GGUUUAGGAGUAGGCAUGGACUUAUAGUGAUUCAUGAUC  
>N5226  
GAGAAAAACAAGGAAGGGAAACUGCAAGCUGAACAGUCCU  
>N5227  
UUAGAUGUAAAAAUUAUAAAACUGUAAAAUCAAAACAGAAG  
>N5228  
GGCUCGAUCUCCAAAACAGACUGUUCACCUCUACCUACUCU  
>N5229  
AGGAGAAAGGGAAACACCAAACUGCCUCUAAUCCAGUCUAC  
>N5230  
CUGUCUUAUGGGUGCUGGGAACUGAACCUGGAUGCUCUGCA  
>N5231  
UAGAAAAGAAAAAUCAAGAACUCACCAAGUACAGAAGGAG  
>N5232  
ACAAGGAGCAGUGAGCAGAAACUGAAGGAAAAAGAAUUAAC  
>N5233  
ACCAAUUAGCACUCCAUAUAGACUUAUGUUUUUAAUGUUCUA  
>N5234  
AGAAUGGUUAUAUGAGAUAAACUGAAGAUUCAAAAUCAU  
>N5235  
CAACAAAGAAAGAAUACAGACUAAGUUUAUCAUAAAUA  
>N5236  
UACUUAUCCACCUAAAGAAGACUCAACUUUAAGUGGAGCAA  
>N5237  
CUGCUGCAAGAUCAAUGUAGACUCCAUGAAGAGUAGACUU

>N5238  
CUUGUGUUUCAGACAAUAGGACUUUCAGUAAUAGGCACAUA  
>N5239  
GCCUAUCAGAAUACACCAGACUUUUCACCAGAGACUAUGA  
>N5240  
GCUUAUCUUGAGUCACAAGGACUUUAAGGACUUGAAACUGG  
>N5241  
UAGGCAAUCAUGUUGGUGAGACUUUUUUUAUAGAACUCCAGA  
>N5242  
UGGGGAGGAAAGAAGUCAGGACUGGAACUCAAGCAGGUCAG  
>N5243  
UUCUGUUUUAUUUCGCCCUAGACUUUAGUGCCUAUUUCUUAU  
>N5244  
ACUUCUUUCCUUAUCCUUGAACUCAGCAACAAGGCCUUUGU  
>N5245  
UCCGCGGCACGGGGACGGGGACUCGCGUUACCUGAGCGGCG  
>N5246  
GCUCAUUAACCACCUGGAAAACUUUGUGGUUAGACACCAGC  
>N5247  
GGUCUAAUUAUUGCAAAGAAACUUAGAAAUUCUAAAAUCUG  
>N5248  
CUUGGGUGGAGCCAAAAAGACUUAAGUAAACGGGCCUC  
>N5249  
UAUUAUUGCUGCACAUCCAAACUCACAGAUCUCUCCACUUG  
>N5250  
GGCAUAAUACAGCCCAGAAAACUAGUCCUCUAAAGAUACUU  
>N5251  
AGUUAUUUUGUUCUUAUAAACUGGUCCUUAUUACAGGAGG  
>N5252  
UUAAGGCUAGAAAGGUGGAAACUUUAGACAUAGCCAAGCCU  
>N5253  
AUGGCCUAGAGGGAAGGUAGACUACCAAACUGGUUUUUA  
>N5254  
GAUUAUUUAUUCACACUAGAACUUCUUGACAGAGCAGAAAC  
>N5255  
AUCAAGAAAUAUCCACAGACUUCACUAUAGGCCAGAUGA  
>N5256  
UUUCAGACUUACAGUUUAAGACUAAAUUGAAACAAAUGGC  
>N5257  
UAGUUUCCAUGUUUUGGUAGACUAUUGAAAUGGUUCCGA  
>N5258  
GAUGCUGAGAGAUGUUAAAGACUAAUGAUUGUUGCUUUCUG  
>N5259  
UGC UUAGGACUGCAGUUAGGACUGCAUACACUAGCAAGAUU  
>N5260  
CUUUCAUUUUGGUGCAUUAACUCAAAGGAAGAGAAAUCAC  
>N5261  
GUUUGAGAGGCAAUGGAGGACUAGAAGUCAUCUCUAGAAC



>N5262  
AAGAGGACACCUGGAGAAAGACUGGCAGGGAUGCUGCAUUC  
>N5263  
GAAGGGGAAAUGGGGAAAGACUCAUCCACAAAUCCUGAGA  
>N5264  
AAAUCUAAGUGGAUCAAGGAACUUCACAUAAAACCAGAGAC  
>N5265  
GACAAAUGGGACCUA AUGAAACUCCAAAGUUUCUGCAAGGC  
>N5266  
UCUAGACCAGAGGUUCUUAACUAUUGGUUGUGGUUCCUUU  
>N5267  
CUUUUUUGGAUUUCAACAAACUUUCUACCAACUGAAUCCC  
>N5268  
GCUUAACUAGAGUUGGAGAAACUGAAGGAGGCUGGGAUGAU  
>N5269  
CUGACCUGCCUGCCAGAUGAACUGCUUCACUACUAAGACUC  
>N5270  
GGGAGGUAGUCAGUGAUAAGACUCGCAGGGCAUGUCACCAA  
>N5271  
ACUGAGAGAGACUCAUGGGAACUUGCAGAUGUCAGGGAGCC  
>N5272  
UGAGUUUGGAAGGAAGGGAAACUGUGGUUGGCAUGUAAUUAU  
>N5273  
UCUGAACUGAACUCAACCAAACUCGACUGACUCUGUUCAAA  
>N5274  
UACAGAACAAAAACAUUAAAACUUGCAAGGGAAAAAUAGCA  
>N5275  
UGAACAAUAUAUAACUUUGAACUAUUUAAAAGAACAUCUA  
>N5276  
ACACAAGUAACACUAUGUGAACUUGCUAACAAAUAUUUCU  
>N5277  
UCUGUGUUUAUGGGUGUGGAACUUCUCUAGCAAUCCAGGC  
>N5278  
CCUGAGACCCAGCACUGCGGACUGGGUUACUUCUGUUCUUA  
>N5279  
GUAUUUUUAGUAAAUAUAAACUAAUGCUUCCCUGUGUCUC  
>N5280  
GAGCUGUGAACUGGUAUGGAACUUUUGCAAUAACAAUAAA  
>N5281  
UAAAAGACCAGGAGCCAUAACUCUCUUCAGUAUAUAAUUUAG  
>N5282  
CAGUUUUC AUGAGUAUGUGGACUUACUGUUGUUUUUGUUUU  
>N5283  
AUCAGACAAAGGAAAGUUGGACUGUGUUAAGAAGAAAAGGU  
>N5284  
CUGUAAGAGUAUAUGCAUGAACUCAGUGAAUUUUAUAGGUA  
>N5285  
AAUCAUGUAGCUUUUCCAGAACUAAUGAUGAGAGUCAUCA

>N5286  
CAAGAAGGUAGACACCAAAAACUAAAAUAACUCAAUUAAAA  
>N5287  
UUUUAUGGUGGAAUCAAGAAACUACUAAGGAUAAGUUCAGA  
>N5288  
AUGUGAUGUUUUUCUGGAAACUGUCUUAUGAGAAGAUGUU  
>N5289  
UGCUAUUUGUGAGUAUUAAACUGAUGAUUCCUAACAAUG  
>N5290  
AGAGUGAUUCACUCCCAAGAACUAUUUCUAUACAUGUUCAC  
>N5291  
UAAGGAAUUAUGAAGAGAGGACUUGCUUAUAAACACAUAUA  
>N5292  
GCGAUACAAUGUUGCAGCAAACUCCUUGAUUUCUGGCUCU  
>N5293  
UUGCAUAAAUAACCAUGGAAACUGAAGUUUUUAUAACAUAU  
>N5294  
UUUGUAGUAAUCUCUCAAGGACUGACAAGAAUGCCUGACA  
>N5295  
CAGAAGGAAUACAGUUGAAACUGUUUAUAUUAAGUAUAAG  
>N5296  
GCACCAUAAGUGUGCUGGAAACUAUACUAUGGUCCUCUGCA  
>N5297  
AGCUACAGCAACACUAAAAGACUCUGACAACUAAUUUUGUU  
>N5298  
UUCAACUGUAUGAAUUCAGAACUUUUCAGCUGGGGAACGAG  
>N5299  
CGAGGUAAGUCUGAUCUUGAACUUUCUAAGGAAAUUCAAGA  
>N5300  
UAGACAUAAAGUUGGCCUUGAACUCGUAAAAUAUGUCUUCC  
>N5301  
CCACCAGGGAUGGGGAAGGGACUUGUAUGGUCCUAUCCCUA  
>N5302  
GAUGACAGCAAUCAUAGCAAACUUGGAUCACUUCACACAGU  
>N5303  
AAUGCCACACAUCAAAUGGAACUAAUAGUUUCACAAGUAAC  
>N5304  
GAAGAUUUUAAAUAUUGAGACUACUCAAUAAAUCAUAUG  
>N5305  
AAAACAACCAUAUUGUAAGAACUUAUUAAGUUUAGGAAUAU  
>N5306  
CCAUGUACUCUAGAGGCAGGACUCAGAAGAUCUGAGUCACU  
>N5307  
UGGAUUAUUAAGUGAGCAAACUUCAGAUUCAGAGGGAAUC  
>N5308  
UCCAAGAGUUGAAGAAAGGACUACAGACGUCCUCAGAAGU  
>N5309  
UGUGAACAUUCACAUAGCAGACUAGGCAUUCAGAACAGAAG

>N5310  
AACUCAAGUCAAUAGUUUGAACUAUUAGCCAUGGGAAAUG  
>N5311  
UUCAUAUGACAUUUUCUAAACUAGGUGUAUAAAACUGUUU  
>N5312  
UGUGUAAUAUAGUGAUUAAAACUUCAUACUUUCCUUUAUGU  
>N5313  
CUGAUCUUGUGUUCAGAGGAACUGGUGGUAUAGUGGAAACA  
>N5314  
UGAAUAUGGGUGGACUGCAGACUGUGGCCUGAAAUAUA  
>N5315  
UGCCCUAGAUGGAACUGGAAACUUAUUCAAACCUUUCAGC  
>N5316  
AUUGAUGCAUAGGAUGCAAAAACUGGGACAAGAGAAGUAACA  
>N5317  
UUUACAUACAAUCAAUAAAACUGUUAGCUUUAGUGAUGUA  
>N5318  
GAGUGUAAAAAUGGUAAUGAACUCAUUGGCCAAAAAGUAAA  
>N5319  
GGCAGUAAAAUAUCCAAAAACUAAUACUGCAUUUUUUUUG  
>N5320  
AUGAGAAUUUUCUCCUAAAGACUGAUUAAAAGUGAGUGAAA  
>N5321  
UAAGUGUGAAAGUGUCUGAAACUACAAGUUACAAGAGACAA  
>N5322  
GUUUUGACCAUUUUAGAGAACUGUUUGCAAUUGACUGACA  
>N5323  
CAUGCUGACACUGAAGAAAAACUAACACAUCCAAAAAUGAC  
>N5324  
UUUCCAUUCUGUUUUCUCAAACUCGGAAACCAUGAAAAUUC  
>N5325  
AAAGUUACUGGCAGUCAAGGACUGCUGAGAGUCAGGGACUA  
>N5326  
UUACAUUAGAAGACUUUGAAACUAAAAAAAAAAUGAGACAG  
>N5327  
CAUAUACUCAUAUCACACAAACUCAUACACACAAACACACA  
>N5328  
GAGAAAGUCCCUGCCUAAGAACUUAGCAGCAUAUAAUCUUA  
>N5329  
CUUUCUUUCACUUGUGUCAAAACUAACAUAACCUAUCAAGC  
>N5330  
GUACGUGAAAAGGCUUUGAGACUUAUACUAAAUUGACAUCU  
>N5331  
AUUCAGUUUUUGAUAGGAAAACUAUGACGUGUACUGUUCUG  
>N5332  
UACAAUGCUAGUGAGACUAAACUGACUUUCUGAGAUGGUAU  
>N5333  
AAUAGUCCUGAACUCAAAAGACUCAAAACCGUCCAACUCAGA

>N5334  
AUGAUUUAGUUGUCCAUGAACUUCAAUUCCCCACUUUCAC  
>N5335  
ACAUGACUGAGGGAUGAUGAACUUAACCAGCUGCAUGGCCA  
>N5336  
UAUAGUUGAAUACAGUGGAAACUAGGAUUUAACGUUUGGG  
>N5337  
AUCUUUACAAAACUACAGAGACUAUGCAUUACAACAUGUGA  
>N5338  
CCACCAAGACAAAUUCUGGACUCAGAGGUAGAUGAAGUCA  
>N5339  
UCUCUUCCAAUUAUGGCAGACUAGGUCAUCUUCUGCUACA  
>N5340  
UCAGUGUCCCCACUACUUGGACUCCAACUUUUUGUCAUCC  
>N5341  
AUUAUGUACCCUCUGUGAAAACUUCAUAUGUGUAUUUUUGU  
>N5342  
GGAUGUGGAGAAAGAGAAAGACUCCUCCAUUGUUGGUGGGA  
>N5343  
CUCUGGUGGCAUGCAUGUGAACUCCCACACAAACUCUUGA  
>N5344  
CAUGCAUGCCUGUAACACAGACUAAUAUCAAAACAUCUGUUU  
>N5345  
CCCAAGCUUUUAAGUCAAAAACUUGGGUGUAUUUUUUUUU  
>N5346  
UAUAAAUCUUUUUGGAUAAACUUCAACUUUUAAAUAACUU  
>N5347  
CCCUGGAACUGUAACUAUAGACUGUAGUAAGCUGUCAUGUG  
>N5348  
CAUCAUGUAGAAUUUUGUGGACUUCUUGUUUGUCCAGUU  
>N5349  
GAGAAAUCAUCUCUCCAUGAACUAGGUACACACCUAUUUUU  
>N5350  
ACCAAUAUCAUUCUGAAACUAUACAUAUACAAGCAAUA  
>N5351  
GUUGAACUUAUUCUCACGAAACUCACUAGCUUUAAAUCCU  
>N5352  
GCCUUCUCAGACUUCUUUAAACUGAGAUAAUCUGACUUGAA  
>N5353  
AGAGGUGGGUCAAUUGCCUGGACUGUAAAUAUUAAUAAU  
>N5354  
AUAAACGUUACAAAACAUGGACUGAAGGAACUAAACAAACA  
>N5355  
UCUCCCAAGCACUCCACGAAACUUCAACUGGAUCAAGAGGU  
>N5356  
AGUUAGUUAGUGUAUAGUAGACUAAUAACAGAGAAUUGAUU  
>N5357  
UGCUAAGCAGUAUCUACUAAACUCUUUUUUUUUCUUGAGAU

>N5358  
CUCCUUUCAUUCAGUCUGAAACUCAAGACUAUGGAAUGGAU  
>N5359  
UUCUAAAUUUCUUCAAUUGGACUUAUGCUGUUCCAACUUU  
>N5360  
AAUAGAGUGGACAGAUGAGAACUGAGGGAGGGCCACAGGGC  
>N5361  
GAAACAAAGCAUCCAAGCAGACUUAUUCACAUGUAAAUGU  
>N5362  
UUUCAUUC AUGUCCCUUUAACUCCAAGUGAAUCAGGCUA  
>N5363  
AUAACUUCUGUGUGAAAAGAACUUCACUGAAAAUUCACUCU  
>N5364  
UCCUUGGGAAAAUAAAUAGAACUGAAUAGAGUCUCUGUUCU  
>N5365  
UCCUUGCCAAGAACAACAGACUUAAGUUUCAUAAUUACA  
>N5366  
AGUUUCCUAUAUUGAUAAAAACUAUAGACUAUGUGUAUACA  
>N5367  
AAAAAAACCAAAGACCACAGACUGAGAGCUCCAAAACUUAU  
>N5368  
AAUAUAACUAGAAGAAAGAACUCUGAUUAUUGCUAAGGUA  
>N5369  
UUUACCAA AUGUCCAGGUGAACUUCACUCCUAACUCCUU  
>N5370  
UAUGUGUAAAACUGUCAAAAGACUACAUAUAUAAUAAAGAUG  
>N5371  
AUUUUCCAAGGCACAUGUAGACUAUGACGUCAAUGUAGAAA  
>N5372  
UCAGUAGUUUGCAAAGCAAACUCUAAGAAUAUAUAUGAAU  
>N5373  
GGUUAAGUUAAGAAGUCAAAAACUCAAAUGUACCUUGCAAGG  
>N5374  
GGAUUAGAGCCUUCUAUCAGACUGUGUUUAUUGACUUUCAA  
>N5375  
UUUAACUUCUUAUAGCAAAAACUGUUUUUGUUUACAUGAAG  
>N5376  
UUAACUGCUAAGCCAUAUAGACUGCCUUAUUAUCAGGACUG  
>N5377  
GCAUCUAUUGGCCUUAUAAAACUACAUUUUUAUGUUGGACU  
>N5378  
CUAUCAGCCAGGGUCUCUAAAACUGAUGAUUCCAGGUUAAG  
>N5379  
UGGUCAAGGUCCUGGGUUAAAACUAUAAACCAUUUUUUUUUA  
>N5380  
GACUUUAAAUAAGAAGACAAAACUGUCCAGCUUCAGCAGU  
>N5381  
GUUAAUUGUCUGUUGAAGGAACUUAAGGAUCUAAUAUAAA

>N5382  
UGUUGGCAGGCUGAGAACAAACUUAUUUAAUUAUCACAU  
>N5383  
UAUCUAGAGUCCCGAUUAUAAACUGUGUAAUGUUCUGAGACA  
>N5384  
UAGUAAUGAUCAAUAAAGAAACUGUUCAGAUUCUAUACUAA  
>N5385  
CUCAGCAAUGGUCUUGUCAGACUGCCGAUAAGCAAGGCUCU  
>N5386  
UGGCAACAGUGUAUUUAGACUACAGAAGAAAUUUAUUUU  
>N5387  
UGCUGUUUCUUGGCCAGAACUGAUCUUCUUAUUUUGCAU  
>N5388  
AAUGUUCUAUUUACUGUUAACUUUCCUCACCUACUUCAG  
>N5389  
GUUACCUGCACUGGAGGUAAACUAGAAGCCCCUAAUUCCC  
>N5390  
UAUGUGCAAGACCUAAGCAAACUCCAAGAGCAGGCUGGGAG  
>N5391  
UGGGGCUCACACGCACCUGGACUGCACAUGAAUUGGAGACG  
>N5392  
ACUGGAGGGACUUCGGUGGGACUAUAGUAGAUUAGAUGUA  
>N5393  
CCUGAUUUACUAACGUUAGAACUCACUUGACCCUCAAGAA  
>N5394  
GCUGUCACUAGUACAUUUAAACUCAAACACACUUGCUGAAA  
>N5395  
CAACGAUUUUAAAGAAUAAGACUGAAGAACUCUGGGAAUUA  
>N5396  
UACAGAAGGUUUAGAUUUGAACUGGAACGAAUCCAUAUA  
>N5397  
ACUUUUCUUUCUAGGAAAAAACUGAUGGAAGUUGAUUCAA  
>N5398  
ACCCCUUGUGGGAAAGAGGAACUCAGUAGCUCUCCUUUAUU  
>N5399  
AUGUUUCCUAAUUUAUUAAAACUAGGACUCACAAAGGACAG  
>N5400  
UGGGAAGAAGAAAGGAAAGGACUAGGUUUGACGUCAGCAGG  
>N5401  
GGGCUAGUUCAAAAUAGUAAACUUAGAAUUCUCAUUAUAGA  
>N5402  
CCAGUACCCCUAGAAUAUGAACUAACUAGUACCCCUAGAGU  
>N5403  
UAUUGAAACUUGAUGAAAGAACUAUACAUUGAAGAUUUUG  
>N5404  
AAGUAUGAAUCUAUGAAGAAACUCUGAGCUGAAGAGCAGAG  
>N5405  
AUUUUAUAAAUUACCACAGACUUCAUGAGUCCCUUUGAAC

>N5406  
CAGUCAACAUCUGUUCAUGGACUUGGUUUCUGAAGGCCUUU  
>N5407  
AGCAAGUGAACAUUUAAAGAACUCAUUGAAGCUUCCAAAA  
>N5408  
UGAAAUUGACAAGCAAAGAAACUAAAAGGUACUAUGGAGCA  
>N5409  
GAGAAAUAGGCUGCAUUGAAACUGAGUGCUACAGCAGGAGA  
>N5410  
AAAAAAAAAAUUUAAACUAGACUGAUGAUUUCUAGAAUUA  
>N5411  
CAUCAGCUCCUUUUUUGCGGACUCAUUAGUUUGAUAAACACU  
>N5412  
GAAUCAUCCUGAGGAUUUGGACUCAGCUCAUUUCAUCGAAC  
>N5413  
AAUAGAUUCUAACAGCAUGGACUGUAGGCAGCUGCCUGGCU  
>N5414  
UGGAAAUAAGUAAUAGAAACUAAAUGUGAAAAGCAUUA  
>N5415  
GCCUUGUUUCCUCAAGUAAAACUGUCCUUAUCAUAGGAUCU  
>N5416  
UAAUUACCUAGAAUUUUAGACUUUCAACAAGAGUAAGUUC  
>N5417  
GUCAACUUCUAAUUAACAAAACUAAGUGGUUUCUCUCACCA  
>N5418  
AUACAAGUAGCUGUACUGAAACUGGUAAAAGGGGAAGACAA  
>N5419  
CCCAAGGUACAAUCCACAGAACUCAAAAAGGUCAACAAGCU  
>N5420  
GAGAAAUCCUGUCUUGAAAAACUGAAAGAAAGAAAGAAAGA  
>N5421  
CAGUCAUUAGAAAUCCAUAACUUCAUAUGGCAGCCAAAAC  
>N5422  
UAGCUGGACAUUGGAGAUAAACUGCAUCUCCAAUAUAGGAU  
>N5423  
GACUUAUGUUAGGUUUCAAAACUAUAGGAGAAUGGAACUUA  
>N5424  
AUCUAGCUAGUUCUGAGUAAACUCAGUGUCCUGAGCGCAA  
>N5425  
GUGGUUCUCACACCAGUCAAAACUGCUUGGAAGAAGCAUAGA  
>N5426  
UAAAUUGUAUAUAAUAGAAGACUAUAAAAGCUGGAUGCCAA  
>N5427  
GUAGGACCCGAUGAAGCCGGACUAACCCUUUCACAGGGUCU  
>N5428  
UGCCUUUCUCCUAAGCAUAAACUUUUCUGUGCCUUUAUCUG  
>N5429  
CAAUGUGCUAAGCCUAAAAACUGUGAGGCAUGGUAGUUUA

>N5430  
AUCACAAACAGCCAGUGAGAACUCAGAGAAUCCAAGUGUCA  
>N5431  
CCGCUAUGUCAUGGGACUAAACUCAAAUCUACUUCCUACA  
>N5432  
AUUGUUCAGUAGCAACAGGGACUGAAGGAUGUAGAAGUGAA  
>N5433  
UUCUUUCUGUAAUCAUGGAAACUAAAUACUCCCAAGCAUUA  
>N5434  
UACAUCCAGAUUUUUACUGGACUUCAGGAAGCCUGCAAAA  
>N5435  
AGUUUAGUUACAUGUGAAAACUUCUGGAAUUGUAUUCAUU  
>N5436  
UAUAGAAACUGAGUUCUAAGACUCUGAGUUCCAGUUCUCA  
>N5437  
UUUGACAAGGCCGAGAGAGAACUCAUCAGGGUUUCAUGUUU  
>N5438  
UUAUAUCUUCUUUAUGAAACUAAGGCUGGAAUUUUUUUA  
>N5439  
UGGUUUUAUUUCUCUAGAAAACUCUAUGGUAGACAGAUUA  
>N5440  
GGGAGGAUGAUGGGUGGAGGACUGAAGGAAGCUCAAUGCUU  
>N5441  
CACAGCCACUGCACUCAUGAACUCAUGGAAGCUAUGAUCAC  
>N5442  
GCAAGAUAGCCAAGAACCAGACUCUUGACGUCAACUCUGGA  
>N5443  
CAGCAUACAAGCACAUUAAAACUUUACUUACUCCCCUCUC  
>N5444  
UGUAAGACAAUAACAUUAAAACUUUUAGCCACAGCAGCAUA  
>N5445  
GCUACAUAUGUGUGGGGAAGACUAGGCCUAGCCCCUGUAUG  
>N5446  
UUUAAAACUCUGUUUAAAAACUCAGCUUUUGUGAUCACAU  
>N5447  
UCUGUGAGAGAGCAAACAAAACUCAAAAGUAUUAAAUAGAU  
>N5448  
AAAGACCAAAGUUAACAAAAACUCUAGGAAAAAUACAGCAA  
>N5449  
CUGGGGACAUACAGGAGCAAACUGAGUGGCGUCCGGAUGU  
>N5450  
ACUGACUCAUGUCUGUAAAGACUGUAUUUUGCCCAUAUUUG  
>N5451  
GGAAAAGGUGGAGAACUUAAAACUUGUAUUUGCUUUUCAUGG  
>N5452  
CUUGUAUUUGCUUUUCAUGGACUUAUCCACAGAGAAGUCU  
>N5453  
AAUCUGUAAGUCUUAAAUAAAACUUUUUUGUUACUUGCUUCU



>N5454  
UUUUUCUAGUCAUAAAAAGAAACUCUUUCUCUCCAGCUGUCC  
>N5455  
GCAAAAGAGAAGGGUUAAGAAACUUAAGAAUUUGUAGGCAAC  
>N5456  
AACUUGUUUCUCAUAAUUAACUUUCUUUAUCAGGUCCUAG  
>N5457  
UGGGUUCUGUAGCUGCAAAAACUAGAAAUUUUUCUUAACU  
>N5458  
UGUUUAGACGUCUCCAUAAGAACUUCUCAAGGAACAACUCA  
>N5459  
CAAAAUAUGGCCAGUUAAGACUCCUUAUCUUUUGUUACUA  
>N5460  
UGAAUUACAAUUGAUUCUGAACUAAGUUUGUGGGAGUUUU  
>N5461  
ACAUUAACCGAGCUUCUGGAACUGCUUCUCACAGGUGUUCA  
>N5462  
AUAUGAGCAACAUUAAUAGACUCAUUAGUUUAUACCUAUG  
>N5463  
GUGAUACAGAUCAAGUAGAACUCUCAAUAAAGAAAUCUCA  
>N5464  
UAAAAAGAAAGGAAAUCAAAACUGGCAAAUUAUUCUUCAU  
>N5465  
CUCUCCCAGACUUCUUUUAACUUAUUGC UAAUUUUUCUUA  
>N5466  
AGUUCAUCUAUCAAGGUGGACUGACCCGCAAACAUUCUUC  
>N5467  
UAUGUACCAAAGGGCUAGAACUAGAAAAAAAAAUCCUAG  
>N5468  
AAGGCAGACAGAGGCUGAGGACUUAGGGAUCCAAUGCCACG  
>N5469  
GAGCUACAUGUACAAAGAGAACUUACCCCAAGAGAUUUGUG  
>N5470  
UGGACAAGCGAGUGCUAUAGACUGACA UUGUGACAAGUGAG  
>N5471  
GAAUUAUACACAUUCUCUGGACUGAAAGCUAUUUUAUUUU  
>N5472  
AUACAAA AUUGAAA UAAAAACUUGACCAAAGUAGAAAAGA  
>N5473  
AAAGCCAAAGCAAAAUAGAACUAAGGUUACAAAUACUCUU  
>N5474  
GCCACCAUGUGGUUGC UAGGACUUGAACUCAGGACCUCUGG  
>N5475  
AAAUAGGAACAAAAAGAGAACUGGAACUGUGGCUC CAGCU  
>N5476  
AAGAACUCUGUGAAGGGAGGACUAGGAGGGAGCAGGGAACA  
>N5477  
UUUACUGCCCAUUA AUUCAGACUAAA UCCUGUUGCUCUCCU

>N5478  
AGACUCUUA AUGUUCAGCAGACUCACAUACCAUAAACAUA  
>N5479  
AACUCACGAUGAUUUUCAAGACUCUAUUAUUCAUAGUAACU  
>N5480  
GGAACUAGAGAAGACGGGAAACUUUCUAAGUAAAGCAAACA  
>N5481  
AAGGGCAUCUCCUCCCAAGAACUGGCAACAGAAUAACACU  
>N5482  
GUAGGGAAAAGCAAAAUAAAACUGGUCCUAAGUAAGAGAGG  
>N5483  
AAGGAAAUCAAACUGUGAGGACUUACUGCCACUCCAGUGAG  
>N5484  
AAAAUAUUGUCACACCAGAGACUGUAGAUGGUUACAAUAAA  
>N5485  
CUGGAAAGCACGGAACUUGGACUCGGGCUUGACAUCCUGC  
>N5486  
GGCAGGAAAACCCAGGCAAAACUGCAGUGUGAGGAAUUGUG  
>N5487  
AUUAUAAACUAUUAUUAAAACUCUCCAUCUUUAAACCGAU  
>N5488  
UAUUGUAUGACCUAGGAGAAACUGCAGAAACUGGCCAUACC  
>N5489  
GAGCUUGAACUCUGACAUGAACUUACCAUAGUGCAAUAGAU  
>N5490  
UCUGCAUUGGCUGUAAGGGAACUUUUCUUCUAGCAUUAGG  
>N5491  
AGGAUAUCAAAGUAACCAAACUAUUUUUAUACCAACAUA  
>N5492  
AAGCUAGUGCUUGUCUGAGAACUUGUCUUGGCUAGGGGUGG  
>N5493  
UCUUUGGAAAAGUCUUGAAGACUCACAGCAGGAAAUAAUA  
>N5494  
AUAAGCACUGUAACAGAUAAACUACAUUGUCAACUUGCUGG  
>N5495  
GACGUAACCCACCUGACUGGACUUCCAUAACAACCCUCAAGG  
>N5496  
GCUAAUUGUAAGCACAGUAAACUUUAUUGUUUCUGCCUGUA  
>N5497  
UAAAUUUCUAUUAAGAAAAAACUAUGAGAAGAACUGACAAU  
>N5498  
AUGUCUUUAUUUGACUUUAGACUGGGAAAGUAGCUGUAGUU  
>N5499  
UCUUCCCUAUUAUAAUCCAGAACUUAAGAUCUUGCUCUCUCU  
>N5500  
GUAUCAGCACUACUGCAGAAACUACUGUGGUUCCAGAAUC  
>N5501  
AAAAACAUGGAAACAUAAAAACUUCUUAACAAAGAACACAA

>N5502  
AGACCACUGACAGUUCUCAGACUCAGAGGUCCAUAACGUCA  
>N5503  
CCAUAUGAUGUUUCUAAAAACUGUAUUUAAAAUUAAAGAG  
>N5504  
AUGUAGGAGUUGGAGAAGAGACUGGAGGAGCUGAUGGGUUU  
>N5505  
GUUAGAAUUCUAAAACAAGAACUUAGAUAAAAAGAGAUGAU  
>N5506  
UUGAGGUUAUGAUGUUCAGAACUACCACUCCUCUUGGUGG  
>N5507  
AGGGACCAUUUGAUUAGAAAACUUUUUUUCCAAAACUUUCC  
>N5508  
UUGUCUCUAGUAUUAACUGGACUAUGUAUCUCAGAUUAGAG  
>N5509  
GGUACCACCUGGUAACAGAAACUCCUUGCAAUAUAAUGAAG  
>N5510  
UAUCAGUAGAAUGCAAUGAACUGGAAACCCAGACUGAGAU  
>N5511  
ACAUUUC AUGAUGGAGCUGGACUUCUGGCCCUACUGAUUGC  
>N5512  
AGAAUAAUACUUUAAAAAGACUAUUUGUCAACAUCUGU  
>N5513  
ACUGUGUCAAGCUGACAAGGACUGCUAACCAUCACAUCUUU  
>N5514  
UAGAGGUGCUAAGGAAUGAAACUUAAAAAGCCUUCUAAUUU  
>N5515  
UAUCUUUUGUACAGUCCAGGACUAACUCACUGACAAUGGUG  
>N5516  
UCCAGUCCUGCUAGUCCAAAACUAUAGGAUCUCCAUGACAC  
>N5517  
UUAGAAGUUUUGAUCCAUAACUACUAAAAAGUGCACAUC  
>N5518  
CCAUAAGUUAGGCUGUACAAACUAAUGUCUGCCUGGACAUC  
>N5519  
CUCCAUGUUAAUACUGAAGACUGAGAAAGGGGACAAGUAG  
>N5520  
AUCCAGGGACACAAACAGAAACUUUACUGUUGUUGUUGAUG  
>N5521  
CUCCUUCUCUAGCUAAAAGAACUAAUAUAAACUGGCUGUCA  
>N5522  
GAGAGUUAGUGCAGGUAAGGACUACAGAAGGGGACAAAAGU  
>N5523  
AUUUCUACAACAGAGGGUGGACUUCAGCAUGGAUCCUGUG  
>N5524  
GUGGUAAACUCACCACCUGAAACUCUUCUCUGAAGGGCUGUC  
>N5525  
CACCCCAACACACCUGAAAAACUAGACCCGGAUUUAAAAGC

>N5526  
GUGACUCAAAAUGUGUACAGACUGGCCUUAUCAGAAUAGUA  
>N5527  
UAUGGGGGUUCAGUGAUGGAACUCAGACCAUCAGACUUGCA  
>N5528  
UAAUUAUUGUAGUCUAAGAAACUUGCAAUUUGAAUAGGUAA  
>N5529  
GGAAUGGUUUGGUUUUAUUGGACUUAGAAUCCAGACUACAG  
>N5530  
GUGCUGUGUCCACUUGGGAAACUGGUUUGUUGGUUUCUUA  
>N5531  
UGGAAGGGACAAGAAUAGGAACUAACUAGUACCCCAGAGC  
>N5532  
CUUGAAACUAUUCAAUUUAAACUUACCUUUAUUAUUAUU  
>N5533  
UUUGAAGAUUUGAAUCUUAACUCCACAAAGCAACUUCAUC  
>N5534  
GGAGUUCUCAUUGACUCUGAACUGUCCAAAACAAGCACUG  
>N5535  
GUUUAAAUGUUGCCUGGAAACUUCUGUCGAAAUGUCAUUG  
>N5536  
UGUGUCUAUAAACAAAAGAGACUUUUGUUCUUUAUAUUA  
>N5537  
CGCUUCAUAAUUCAGGUAAACUAUCUAGCCAGUUUACCCU  
>N5538  
AAAUCUGCCCCAGUGGUGAACUCCUCCAGCCGGUCUGUA  
>N5539  
CUCGGGGCAUCCCUACUCGGACUGAGCUCGGGGCAUCCUA  
>N5540  
CAUGAUGC UUUUAAUACUGAACUCCUGACUCCUUGAUUUAA  
>N5541  
AUAGAUACUAUGUAACCCAGACUAGCCUCGCAUUCACUGUG  
>N5542  
AUUUCAUUAUAGAAUAGGAACUCUCCAUUGCUGGUGGGAU  
>N5543  
GAGUGUGUACACAGUCCCAAACUUCAUACUGUUAUUGUACC  
>N5544  
AAUUAUUAUCAACAUGAAGAAACUACUGCAUGUGAUUAAUUC  
>N5545  
AGACAAAGUUUGGAGCAGAGACUGAAGGCAUAUCCAUCAG  
>N5546  
GUAGAGAGACAGCUGGGUGGACUGCAGCAUUUUUAGACAGA  
>N5547  
AAGGUGGAGUUGUCAUGGGAACUCCUGUAAUGGAGUUUAC  
>N5548  
CCCUGGUAAGACCAUGGAGGACUUUCUCCCAAGAAGCCUG  
>N5549  
ACACACAAGAUCUAAUUGAAACUUGAAUUUGCUAUGCAGAC

>N5550  
UUGAUCAUUGAAAUUGGAAGACUGUCCAUGAAAGAUACUG  
>N5551  
CCUCAGGCCAUAGACUACAAACUGUGUGAGGUUGAAAUAAG  
>N5552  
CUGGCAUUGACAUCAGCAGAACUAGUCUGAUGCCAAAAGAA  
>N5553  
AAAGAGGCCAAGAUAAUGGAACUAGACAAUCAGCUAGUCAC  
>N5554  
AUCUGCCAGCCUCUGAGAGGACUCUCACCUCUACUUUGAGC  
>N5555  
CCUCACACAAUGUAUUUAAAACUUGAAAGUUUAAAUGUCA  
>N5556  
UUUAAGGUAUGCAGAAAAGAACUGAUCUUUGC UAAAGCAG  
>N5557  
UGGAAAUGUCCA UUGAGAAACUGAAGUGCUGUCAUCAUG  
>N5558  
UCUCCUCCUUUGUAUUGGAGACUGUAUUUCCAAACCCCGUG  
>N5559  
GGUGAUUCCACCUGCAUGGGACUGCAGGACUCCAGGAUCC  
>N5560  
AAUGUCUGAAGCCUGUGCAGACUAGUCUUGGCAGGAUCCAG  
>N5561  
AUGUAACGAGCUGGCCUCAAACUCACCACCUAGCUACAUA  
>N5562  
UUCUGUGCAUCUUCACAGAGACUAGUGAGGCAGGUAUCCU  
>N5563  
AUUUUUUCAGUGAGCCAAAACUCUCCUAGCCUCAUAGAU  
>N5564  
AAAAACUGAUUACAUAUAUAAACUGGCUAAGAUACAAGUA  
>N5565  
UAUCUCUUCACAGCAUGGAAACUAUAAGACAGUCACCUAAU  
>N5566  
UGUUGGGAUGGGUAUGGUGGACUCAGAGGGAGAGGAUGU  
>N5567  
AAUAUGUUGGGAAACCAGAACUUGCUGUGGGGAGUACU  
>N5568  
GCUCCUUGUUUAUCCACAGAACUUUAAAAAAGAAAGUAGAA  
>N5569  
AGGAGACUAAGUUACCAUAAACUCUUCUCCUUGGGGCUGUG  
>N5570  
UCAGCCUCCAGAGUGCUUGAACUGUAGGCAUGUGUCACAGU  
>N5571  
CAGGGUCUCCUGUAGCCAGACUGGCCUCACAUUUGAUUAG  
>N5572  
UUUAGUGACAAAGAAGACAAACUAACUAACUAGUGGUUGAU  
>N5573  
AGAUCUAGAGGUGGGGGAGAACUGGAGGUAGAAAGACAGUG

>N5574  
GCAGAACUGUAGACGUGAAGACUGUGAGGGCCAGGAUGAUG  
>N5575  
AGGUACAGGUAUGCCUGUGAACUCAGCACACAACACUGGUG  
>N5576  
AAUGGUUUUAUUCUCUUGGAACUUCUCACAAUAAAAGUCA  
>N5577  
GAAGCUGACAGCUUCUGGGAACUGCCAAAGCAACACAGCUU  
>N5578  
ACACAAAAGACUCCUAAAAGACUUUGCCUGAAAACUCUUAU  
>N5579  
AGGAAGAUUCUGACAGGUAGACUCCAGACAAGUGACUCUGA  
>N5580  
GAGAUGAUAGCAGUGUUGGGACUUUAUUGGAACCCAGUUCU  
>N5581  
AUGACCCUCUAUUCUGCCAAACUUCCUGUCCAUUUCUUUCU  
>N5582  
AUGAACAGAGGCCAUGGGGGACUACUGCUUACUGAUUUGUU  
>N5583  
UGCCCAACAGUUUCUUUGAAACUUUCUCCUAAUUCUUUCAC  
>N5584  
UUGGUCAGCUGCUGGGUGGAACUUCUCAAGGAUCCUGUUC  
>N5585  
UUGUAACAGGACAAAAUGAACUGAAUCCUCCCUUCAAC  
>N5586  
AACAUACCAACAUCAAUAAACUACUUUAUUAACAGUAUA  
>N5587  
GUGUUUCCUCUUUCUAUAAACUGUGUAAUUUUGUACUUCU  
>N5588  
UUCUUUUUCCUGUGCUGUAGACUUUUGAAGUCUUUAGCCUC  
>N5589  
UGAGCUUCGUUAAAAGUAAAACUAUUAAUUUGCAGGCUGGG  
>N5590  
AUGGCAGUUGAAAGCCAGGACUGAAGGGCUC AUGCAGAGA  
>N5591  
AAAAAGGUGAAAAUAAAGGGACUUCUCAGGGAAGACAUGA  
>N5592  
AUGAAGGACUGCACCUCUGAACUGUGAGCCACAAUGAGCCC  
>N5593  
GUCCUAACUUCAAUAAAGGGACUGUGCUCUUGUGAUCUUCU  
>N5594  
GAGCCUGGGUCUCCCAUGGGACUUCAAUACUUAGAGAUGCU  
>N5595  
AGAAACAGCCAUAAAAGUAAACUGUUUUUCCAAGGGGUGCU  
>N5596  
UAUUUGCCAUUUGUCUAUAGACUGUCCCUACUGACCACUCU  
>N5597  
UUCUACUCUCAAGGAUAAAACUAAGAACUAGACUUUCCU

>N5598  
GGAGGCCAUGC UUAAGAAAACUGACACUCCCCUCCUGUC  
>N5599  
GUUUGGAGGCUAUAAAUAGGACUCCAUGGAGUGACUGAGAC  
>N5600  
ACAGGGUCCCCAAUGGAGGAACUAGAGAAAGACCCAAGGAG  
>N5601  
UCGAAUUGAAGAGGUACUAGACUCAAGCACCAGUACCAAAG  
>N5602  
GAAUGGCAGAU AUGCAAAGAACUCAAGCUACAGAGCAAGAA  
>N5603  
GUACAGGUGGCUAUUUACAAACUUUCUUUAGUUAUUGGAU  
>N5604  
UCCUUCAGUUUCUGCUCCAAACUUUGUCUCUGUAUCUCCUC  
>N5605  
GUAAAAAGGAGUCAUAUAAAACUCAAGGGGCCCCGUCUCUC  
>N5606  
CUUGC UUGAAGUUGUUGGAGACUGGGUCUUCGACAUCACC  
>N5607  
UGGAUCAUUCUGUAAACCAGACUGGCCUUGAACUCAGAGAU  
>N5608  
CAGUCCCAAAGGCACCAGGGACUGCAGCUAAGUCGUAUGAC  
>N5609  
ACCAGCAUGCUGGGGUCGAGACUCAUGCACUGCGAAGGGGG  
>N5610  
CCACAUGGUGGAAAGAGGAAACUGAUUUCUAUUAGUUGUCC  
>N5611  
CUCUGGAUCACUCAUCUGAGACUAAAUGAGGAGAAUAAAUG  
>N5612  
UCACAUCCCUGACAUAUGAGACUUUCUAGUGGUUCUGCAAG  
>N5613  
CAAAGGAUAAAAAAGUGAAAACUCCAACACAGGAGGGAAAU  
>N5614  
UCCUUUACCACAGGCCCAAACUGGGCAACAGCUCUAAUAA  
>N5615  
UCUUUAUAACAGCCCAUGGAACUUGUACUGAAAUAUCUUUG  
>N5616  
CAACCUAAUCAAAAAAUAGACUUCGUCAAAAUUAACUA  
>N5617  
CACCCAAUCCUUCGACCCAGACUACAUCAAACCUAGCAGAA  
>N5618  
GGGCGGGGGGUCACUUUAGACUUUGGAAGUCUCUCAGAAU  
>N5619  
AGUAACCCAGUAAAUCAGAACUCUAGAAGCUUAUAAUAA  
>N5620  
GCCUGGCUUGUUGCCAGGGAACUGUUGGUCAGCGUCUAGAA  
>N5621  
GCAGAUUUUCACUGAAAAAGACUAAUAAUUUUUCUUCUCUG

>N5622  
GGGCCUGUGGUUGUGACUGAACUAUAAAUUCUUCAUUUUCA  
>N5623  
CUGAAAGUAACAUGACCAGAACUACACCCUCCACUGUGU  
>N5624  
CUGCUUUAGGGGUUCAGAGACUUAAGAGGUGGGACUAAGC  
>N5625  
AGUCAGGACUACACAGAGAGACUCUGUCUCCAAAAAACAC  
>N5626  
UUACAAGUAUUCGAAGUAGAACUUUUUAAAAAUAAAAA  
>N5627  
AAAGAAAAGGUAAAAUAUGGACUUAGAAAACCGUGCAUGUG  
>N5628  
GCUCUAGGUUCAAUUGAGAGACUCUGCCUUGGUGAAUAAGG  
>N5629  
UUACAGAGACACAGUUUGGAACUGAGAUGAAAGAAUGGACC  
>N5630  
GAGAGUGGUGAGCCAAGGGGACUUAUUAACCAGCUUCAA  
>N5631  
ACCAGAGCUCUGGGGUCGAAACUCAUGCACCUAGUGGUGUA  
>N5632  
CCUUUUGAUCAAGAUGUAGAACUCUCAGCUCCUCUAGCACC  
>N5633  
GCCUUGGUUGCCUCCCAGAGACUGAAAGUUAAGUCCCUGUG  
>N5634  
AUAAAAUAUGUAUGCAGAAAACUCAAGGAACAUCAAGGAGA  
>N5635  
UGAAUAUACCCUCCCUGAGAACUAACUCCAUGGUACCAGA  
>N5636  
AGCCAUCCUUUUGGCUCCAGACUAGCUCAUGCCCCACCUUU  
>N5637  
AAAGGUUAUAAGAAAGAGGGACUGUUUGUGUGUCUCCCAG  
>N5638  
GACCUCCUCCAACCACUAGACUGUGGGUGGCAUGUGACUUC  
>N5639  
AUUAUAAAUAAAACCAGAAACUAAAUUAAUUAACUAAAA  
>N5640  
UUUUCAUUCAGUCAGGAAAGACUUGAAAAAAAAAUUUUUUG  
>N5641  
CGAACCAAGAAACCAUCAAGACUGGUGCUGGUGAGGGCUGC  
>N5642  
UAAUGGACUAGACCUCUGAAACUGUAAGCCAGCUCCAAUUA  
>N5643  
GAUGUUCUAUCUCCAGCGAGACUGCACUACCUAAAUUUAUC  
>N5644  
UGGCUUCUUUCCUGGAGAAGACUUCUGUGGAGAGCUGAGGG  
>N5645  
UUGCUC AUGCUGUCAGAGGGACUUGUUCUCCUAGGGUCCUC



>N5646  
CUUAUUUAAAAGAAAAUAAACUGCAAAAGCGCAGUUAAGU  
>N5647  
CCGUAGGUUCUAAAGAGAGAACUCACUCAGGUCCUCACAAC  
>N5648  
UCAGUUUCUUCAGAACACGGACUUGUUCUAGAAUGUGUUU  
>N5649  
AUGGACACCUCUUUUGUUAACUCUGUAACUUAUGUCCUC  
>N5650  
GCAUCCAGGGUGGAAAGCAAACUGGAUACUAGAAGAACUAC  
>N5651  
UGUGAGACACACUGUGAAAAACUACAGCUCACCACAAGAUUU  
>N5652  
UACGAGAAGAAAAGAGUGGGACUAGGGUACAGCCUGAAAUU  
>N5653  
AGGCAAAAAAUUCAACAAACUGGAAUAAUUUUGUGCUGU  
>N5654  
AGAUACCCACAUCUGAAAAACUUUGCCAACAUGUGAGACA  
>N5655  
CCUAAUUAUAAUUCUACUAAACUCCCUGAUUAAAAGGAAAA  
>N5656  
UGGCCUCUAUGGGCACUCAAACUCACAUGUGCACCACUACC  
>N5657  
UAAAAAGGCUAAAUAGAAAACUCAAUUAAAAAACUUAGC  
>N5658  
UUAGUGACUGCAUUCAGGAGACUGGAGAGGCAGAUUUCAC  
>N5659  
AAGCAGCUUAUAGUCACAGGACUUCAGGAAAAGGAAAAUAG  
>N5660  
GCACUGAGAAGGGGAAAGAGACUUAAGUGAGUCCUACCCUA  
>N5661  
GAUAUUGACCUCUAAUACAAACUUACCUUGAUCUUCAUUG  
>N5662  
UCUCACAUGAAGAGACCUGAACUCUAUCCACUUAUUGCUAC  
>N5663  
UCUAGGAAUUAUAAGGGUAGACUACCCAGCUACGCUCAGCU  
>N5664  
ACCUCCAUAGUGGAUGCUGGACUCGGGUGUGUUGGAGAUAU  
>N5665  
UGUCAUAACUAUGAUACUGGACUAUUUGACACUUAUACUAC  
>N5666  
UGAGCAGUUUCCAGCCCAAACUGCAAUGUAGUUUAUAACU  
>N5667  
UGGACCGUGAAGCACCAGGAACUGACUAAGGUGCAUAAUUU  
>N5668  
ACAUUGUAUACAUGUGUAAAACUGUCAGAGUAAUUUUAAA  
>N5669  
AAGGAAGGAAGGAAGGAAAAACUAGCAGAAUCUGUAACCAA

>N5670  
CUUUGACAUCACUGUUUUGAACUUUGACUUUUUACAUUCCU  
>N5671  
AUAUCCAAAUAUAUAAAAGAACUCAAGAAAUCAGCCACUAG  
>N5672  
UUUCAAUUAGCACAACAAGAACUGGCUACACAACAAGAGUU  
>N5673  
GACGAACACCUGAUGAAUAGACUCUGCAGAAAUCCACAAAU  
>N5674  
AGGGUAUGGGAUCCUCUGGGACUGGAGUUAGGAACCCAGCG  
>N5675  
GGACAAGGGUCAGAUGAGAGACUGUUGACAUUGUCUGUGAC  
>N5676  
GACUAACGAGUGACCGUGGGACUGCUUCCUGCUGUAGAAGC  
>N5677  
GCCAUGGUGGAGGGAAAGAACUGAUUCCUGAAAGUUGUCC  
>N5678  
UUUGACCUUGACCCUUGAAGACUGGAGUUAGAGUCUUGCAU  
>N5679  
ACAGUUGGUUCUUUUUGAGAACUUCGAUUUCUUCACAUCU  
>N5680  
GGGAGGCCUUAUCUUUAAAAACUAGGUAAAGAGCAAUAGGG  
>N5681  
UCAAGCCUAGAUAGAAGGAAACUGAUAACAGCCACACAGGC  
>N5682  
GGCUAGUACCACUAGGCCGGACUAGACUGUGCCUCUUCAAU  
>N5683  
ACUUCUCCGUGGGAAUCCGGACUAGGAAUAGUUACAUCAAA  
>N5684  
ACGCGGUUAAGAACAUCUGAACUUGGUUUCCCAAUGACUC  
>N5685  
CUCUGUUGAACAGAGGAGAGACUUACCUACAAAACAAAGAU  
>N5686  
CCGAAAAGGUAUUCUAUAAAAACUUCUACUAGGAAGCUGCUU  
>N5687  
AUAUAGCAGACCCCCAAGAACUCACAAGAGACCAAACUUG  
>N5688  
ACACUACCUUAUUAUUUUGGACUCAAUUCAAAAUUUAUCUA  
>N5689  
UUUCCAGUCUGACCUGGAGAACUCAAGAUGACCCUGCACAU  
>N5690  
UUUUUUCUGGUUGCCCUAGAACUCACACUGUAAACCAGGCU  
>N5691  
ACCCACACAGGACAGCUCAGACUUAACCGGGCUGCUUAUCUA  
>N5692  
GCUGGGAAUUGAGUUCAGGGACUUAGCCAUGCUAGGCAAGC  
>N5693  
GUAUUCUAGAUGGAAUAAGAACUAACCAAACAAGCAAAGA

>N5694  
UCCUCUGUUUAUACAGCUCAGACUUGUCUACCCAGGAAUGGU  
>N5695  
UAUGCCUUUCCCAAGUGCAGACUCUUAACUGCUAAUAAAGA  
>N5696  
UUUCCCUCUUGAAGGAAGAAACUGUUUUAGUGAUGCCCACA  
>N5697  
CCUCCUUUGAAAAAGUUGGACUUUAUGUCAGGAGGAACCU  
>N5698  
GCAAGGAUUUUCUGAAAAGGACUCAGGUCACACAGAUGCCA  
>N5699  
GGUUCAUGGCAGGCUUCAGAACUCCAAACUCUUCUGUCUCA  
>N5700  
GGUACAAUCAUGAAAGAAAACUUUCUUUCCCUUAUACUAG  
>N5701  
GCAACAUUUGUCAUUGC UAAACUCUUAGUUCUAAUGUGACU  
>N5702  
ACAGGCAAACUGUGAGUCAAAACUUCUUCACACAAUUAUUU  
>N5703  
UCCUGAACUUACAUCCUGAGACUGAAUUACAGAGAAAGGGC  
>N5704  
AAUAUCAAAAAAGAGAAAAAACUGUGAGAUUUUGUGCAAGA  
>N5705  
GUUUGUACAUGUUAACUAAGACUUUGCUGUAGCUCUCAUGU  
>N5706  
AACAAAUGCCACACAAUGAACUUAAAAUCAAACUACACA  
>N5707  
UUAAAUAACUGGUUAACUGAACUCACUGAUGGAUUGGGGUG  
>N5708  
CACUGGACACCAGCCCGCAAACUCAAGCACUCAGAAGGCAC  
>N5709  
UAUGUUCUGGCAGGACUGAAACUCACUAUUUAGACCAGAAU  
>N5710  
UCUUUUUGGAGGCACUCAGGACUAUAAGUUUCCUCUAGG  
>N5711  
UCCUCCUGUGAUUCUGUAGACUCUGUCAGCAGUCCUGGGA  
>N5712  
UCUGUGCAGCACAGUCUAAGACUGCCUUGUAAUGGUCGGCU  
>N5713  
CCUUUUCACAGCACUGUCAAAACUUUCUCUCUGUCCCACACU  
>N5714  
AUCCUAUCACCAAUCAGGAGACUAUAAAAGGAUACAACUCU  
>N5715  
UGCGCUUUUAGCCUCUUUAAACUUAAUAAGGCCACAAAAA  
>N5716  
ACUACAGAUGUUGCCAAGGAACUAAACUGACC UAAAAUAC  
>N5717  
GGGUCGUGAGAU AUGGACAGACUGAGCAACUUGAAGAGAAG

>N5718  
CAGUCCCCAAUUUUUCUAAACUUAUUUGUGCUAGUUUUAG  
>N5719  
CGAAGACUCUUGAUUUACAGACUUCUAAUUCAGAGCUUACA  
>N5720  
GACCUGCCAGUGC AAAAGAGACUAGGCCUCCUUCGUGGGAU  
>N5721  
UCUAUGGACAAACUAUCCAAACUUUUUCUUAUUUAUUUUUCC  
>N5722  
CAGUCCGGGUGCUGCCGAGGACUCUGCCGAGGACUCUGCUA  
>N5723  
UGGAAAGGUGGGGGUGAGAGACUGGAGCUCAUGGCGGAGCA  
>N5724  
AAAAACAACAACACAGACAAACUAACCAACAGCCACCCUCC  
>N5725  
UCAGGGCUGUCCUCCUGGGGACUGAGAAGAAGCCCGAGCAG  
>N5726  
AGGCUACACUGGCCAAAUGAACUUUUGCCAGGUUCUAUGCU  
>N5727  
UGCUGGUCUCACUGCCACGAACUCUAUGGAACCAUGUUUA  
>N5728  
UUGAAUUUUUAUAGCAACAAACUGAAGAAGAAAAACAACCU  
>N5729  
GCUCAUCUUGAGGUGUGGAGACUGUAGAGUUUGGCAGUUUG  
>N5730  
CCGAUUUAUGGCGCAACUGGACUGCAACUCGAGCCUCUAC  
>N5731  
CUGCUUGGAUGCAGGGCAGAACUUCUCCAGAGUUCUGUCA  
>N5732  
UUUUUCAUUUAUUAAAAUAAGACUUCAAAACACCAAAGGCAA  
>N5733  
AUAACCUUAAUUUAAUGGAGACUAGAAAUAUUUCCGCAGAC  
>N5734  
AGAGAGAAUAUUCUGGUAAGACUGGAGCAUUAACUAGAGA  
>N5735  
ACAGCAUUCAGUCACAAUAAACUGAACAGUCUAGGGUGCUG  
>N5736  
UCAUUAAAAGAAAAACAAAGACUGUCUGUCUGUCUAUUCUU  
>N5737  
CGAGUUCCUCCAGGUAGGGACUUUCUAACUCAAAAGGGAC  
>N5738  
CUGACCUCUAACCCAGUUAAACUUAGAACCUACUUUAGCAA  
>N5739  
GGCAGAGAAAAUAUUAUAGGACUGCAGAGCUAAGUACUACA  
>N5740  
GGGUAGUUCAACUGCACAAACUGAAAGUGUGCCCUCUCCC  
>N5741  
CCUUUUUCAUAUCUGGGAAAACUCCUCCUGUUAGUAAUCUA

>N5742  
AACUGAUGCACAUAUUAAAACUGCCUAAAGCCCUGUUCUA  
>N5743  
GAUUUGCCUGAAGAAAUUAAAACUUAGUAAGAAUACAACUUC  
>N5744  
CCAAGAGAAAGGACACUUAAAACUAUGCACGUUUUCUGAGAC  
>N5745  
ACAUAUCUGACUGGUGAGGAAACUGUGUGCUCCUUACCAGUC  
>N5746  
AAUJCCUGUCCACCAGAGAACUGGACUUGAGCUGAGUCAG  
>N5747  
AGAGCUCACCCAAACCCAGAAACUUUCAGCAAUAACAAUUUG  
>N5748  
CCUACACCUUCCUUACUGAACUUGAAGCUCAGAUACUUUG  
>N5749  
GUCUGCACUAGGAAUACUGAACUUACCUCAUCUGGAAGGUU  
>N5750  
GGAUUUAUCUUCAGGCCAAAACUCAUCAGUGUAAUCUAUG  
>N5751  
GUAGUCUAGUUGUCCUGGAAACUCUGUCUAUAAAGCAGGUU  
>N5752  
CUUAAUGGCACAGAAUAGAAAACUAGUCUUUUCAUAUAUUCA  
>N5753  
AAGUUCUGGUCCAUGAAAGACUCAGCUAUAUUAAAAAAG  
>N5754  
AUGCAUGCGCUGGGAACUGAACUCAGGUCCUUGUGUGCUCU  
>N5755  
UGGGGUGGCCAGGAUCUGAACUCUGAGAGCAGAGCACAUG  
>N5756  
UUAAAAAAAAAAAAACAAACAAACUUGCCAACAUGUCUUAUG  
>N5757  
UAAAUCAAAAGCAAUGAUAGAACUGACAGAGUCACCCAGCAG  
>N5758  
ACACACAGAUGUCUACUGAGACUGCUGGGAGUUCUGGAUUC  
>N5759  
UAAUGAAAUAUGUUACGAGACUAAGAACUCUGAGAGGCAA  
>N5760  
AGGGCACAGUGAGCUGAUGAACUGUAUAGCCUCCAACAGAG  
>N5761  
CUGUAUAGCCUCCAACAGAGACUUCUGUUAUUUCUCUUU  
>N5762  
GACAGGAAGGUGGAGGGAGGACUAGUAAGUGGGAAGAGGGA  
>N5763  
CAAAGGCUGCUCUGGGAGAACUGAAUCAUACAAAUGAGGA  
>N5764  
GGCAAAAUAACUAACAGAAACUUAGACAUAUCCAGAAGA  
>N5765  
UAGCACGCCCCACAGACCAAACUUUUAGAGGAAAAAAAAAA

>N5766  
CCACCUGUGCUGGGACUUGAACUUGGGUCCUCUUCAAGAGC  
>N5767  
UUUCCUGAGGCUGAAGGAGAACUCUUCAGACAAGAACCUCA  
>N5768  
UGGUCACACUAAGUAGGUGAACUGAAUCUUUUGCCUUUUUU  
>N5769  
CAUGGGUUCUAGGGAUUCAAACUCAGGACCUUGUGC UUUCU  
>N5770  
CAUAAUCCCUUCAAGUAAGAACUUUAUUCAAUUUUCACGUA  
>N5771  
GGCUCUUCAAAGAGUCCAGAACUCUAAAUGAUACUGAGCUG  
>N5772  
AUCAUCCUGACAAGCAGAGACUUGCCAAACAAGAAAGGAG  
>N5773  
AAUUUAGCAAAAGCCCAGGGACUUUAGA UCCC UCCCACAAG  
>N5774  
ACAUUUUUAUUCUUGUAUAAACUAUUACUCUUCAAACAAC  
>N5775  
CUGCACAAAGCAGCUAAUGGACUGGUACAAUCCGGGGAUGA  
>N5776  
CUCUGCAGUGAAGAGCACAGACUGCUCCUGCAGAAGAUCCA  
>N5777  
ACAGCCUGACGAUGGCUUGAACUCUUGACCCUUCUGCCUCU  
>N5778  
GAGCUGAAGAGAACUGGGAGACUCUGAAUGAGAUUCUGGAA  
>N5779  
CUAUCUUGUUGCCCCUAAAGACUGUUUCUUGUCAUUUAUCU  
>N5780  
UGAUCUUUUGUAGGAUGGAGACUAGAUUCUAUGUGUCUGUG  
>N5781  
CAAUAUUAUUAUACAUGAAACUUCUAGUCAUUUCAAAGU  
>N5782  
CUAUCCUUGAGUGAGAAAAACUCUUAUACUGAGAAUUUCU  
>N5783  
GAACAAGCAACUCCAUGAAGACUGAAUGCAGUCUGACAGUU  
>N5784  
UCAACAAAACCAACUUCAAAACUAAUCUAUGUGAGGAAAAC  
>N5785  
UUUUGAUGUAAAUAACUUAGACUCUUUGAAAAUAAACUAGA  
>N5786  
UGUCCCCAAGCCCUGAAUAAACUCAGUUCUAUACUAUUUA  
>N5787  
AAGGAGUGAGCAUCACACAGACUCUGUCCUUGCUCUUGCUC  
>N5788  
UUCUGUGACGAGGAGAUGGAACUCCUAUAUCAUCUUACCU  
>N5789  
CUAUUCUUCACUUCUGAAACUAUCAUCCAUUCUAUAGGG

>N5790  
GUGAAGGCACAGAGAGGCCAAACUGUCUAAGUCAGGCAUCCA  
>N5791  
UCUGGAUACAGAGAGGGAAAACUGGGUUGGGAGUCCUCUGU  
>N5792  
CAGAGCAACUCCUCACCGAGACUCUCUGCUCAGAAGAUUCU  
>N5793  
CAAAACACCAACAUA AAAAGACUGUGAUGUGGCUCAGCGGA  
>N5794  
AAAAAAAUUAAAAGCAACAAACUGAAAGUCACAAAAAUCAC  
>N5795  
AAGCUGAAUUCAGAAACCAGACU UCCUGUCCUGUUUCUGGU  
>N5796  
UAGAUACAUAACUAUAUGGACU UUCUGGAUGAACUCCAU  
>N5797  
UCAAAAUUGAGAAGAAAGGAACUAAUUUGGACCAAGUUUUU  
>N5798  
CAAGAUGAAGAGAAUAAGAGACUGUGGAGAGCCAGCUCUA  
>N5799  
CAGUUGCAUACAACAUAGGGACUCUUGGGAGGUAGAGAGUC  
>N5800  
GGGGCAAUUUCAAGUGUGAACUGUUGAUUUAGUCUGCCCA  
>N5801  
ACAUCCUGAUUGUCCUGAAACUUGUUCUGUAGACCAGGAC  
>N5802  
AGUUGCAUGGUUAUACAGAAGACUUCAAAAACAAAACCCAC  
>N5803  
UGGUCUGUAUUGAACUUGAAACUCAUUCUGGUGCUAAGCAU  
>N5804  
GUAGCCUUAACUUGCCUGGAACUCACCAUGUGUGCGUGUGU  
>N5805  
UUUACAAGGAGUGCCUUUGAACUACGAGGGAGAAGUGGGCA  
>N5806  
GUUGUUACUUGGGAGUAGAAACUUAUUAACAGAACACCUG  
>N5807  
AUGAGACUCCAUAAGGAAGACUCAAGAUUAAUUUUGGAGA  
>N5808  
CUUGUAAGACCUCAGUUUAGACUUCUCUAUUAAGGAAGUUG  
>N5809  
CUAUCCCAAAGUCCCCCAGACUCUCUCCUCCUCCCCUCCC  
>N5810  
CGACAAAAGCUCUAACUGAGACUGUCCUUCAUAGCCACCGU  
>N5811  
CCAUGAUUCUUUCAGCAAGACUGAGUUAGCAAUUCUGAUG  
>N5812  
AUUAAAAAUUAGUUUUUUAACUAGAUUAUUAUCCUAGGAGU  
>N5813  
AAGAGGGAGAAUAUAGUGGACUCUAAUUCUUAACAAGGACC

>N5814  
AAGAACUCUAGAAAAUGUGGACUGGUUGCUACCUGGGAGGA  
>N5815  
UCUCUGUGGGCACUGCAUGAACUCUAUAGCCAUACUUGUAG  
>N5816  
CAUGGCAGGACAUAGAGGAGACUAAGGGAGAACACUUAGGG  
>N5817  
AGUUUUUAUUUUGACAGAGGACUGAAUGUGAUGGUCUGCCC  
>N5818  
CCUUUUUCUAGAAGUUUAAACUGCCUAAGUACAGCAUGCA  
>N5819  
AAAUUUCUGACAGGAAGAAAACUUGGGGGAGGGCCAACCUG  
>N5820  
UAUGCAUGCUAACCACACAGACUUCUGUUGUAGUACACCCC  
>N5821  
GCUUCGGGUCAGGAUGUAGAACUCUCAGCUCUUGCAGCACC  
>N5822  
AGGGCCAGCCUGGCUUACAGACUGAGCUCCAUGACAGUCAG  
>N5823  
CAUCUGCUCCCAGAAGCCAAACUGUAACAAGAUCCACCAGU  
>N5824  
AUAUUUCAGGCUAGCCUCAAACUUGCUAUGUAGCCAAAGAU  
>N5825  
AAAUCAUCUGAAAUUAUAAAACUGGAGGAAGGGAGGAAGGA  
>N5826  
AAGCACGGGCAGUUUUGGGGACUGAAGAGAUUGCUGGCUC  
>N5827  
CUUGUAUGACCCUGGAUGGAACUCACUCUGCUGGUGGCGAU  
>N5828  
UGUUGCUAUGAAUGAUUUGAACUGUGCAGAUCCUGGACCAAG  
>N5829  
ACUUGUUUUUAUCCCAUGGAGACUCUGACUCAGUGCUCCAA  
>N5830  
GAGACUCAGGAUGACCUUGAACUUGUUAUGUCAUGAGUAAU  
>N5831  
ACCUCUGUAUGGGUAAUGGGACUUGAACUGGCAUCUUUUGC  
>N5832  
GGAUGCUGCUGUAAUUAUAAAACUCCGAUGGCAAUCCUGAGC  
>N5833  
GCAAAGCAAGCUGGCCUUGAACUCACAGAGAUCACCUGCC  
>N5834  
UAAUCUAGGAGAGGAUCCAAACUCAAAACUAUUAAGGCAU  
>N5835  
GUUAUUCUUCACUGAAAUAAAACUGGUAGGUGCUAUUCUAUG  
>N5836  
AUCUUAUUGUACUAGCUAGAACUUUGAGUACUGUAUUGAAU  
>N5837  
UAAGUAUUCUAUAAUCUAAAACUUAUACAGUAUACUAUAA



>N5838  
UAGACAAAAGCUGGCCUGAACUCACAGAGUUCUCCUGCU  
>N5839  
UAUCCUGUGGCCUGGGAUGGACUCCAGUGUUUUGUAUAUCU  
>N5840  
UAUAGUCCAAAAGUCAGAAGACUUGGCUAAUAGAUCCAUUC  
>N5841  
UGUUGUGUAGGCUAUCCCAGACUGAAUCACAAGGUUAAAA  
>N5842  
UGUGUACCUAUAUCCCGGAACUCCAGAGAUAGAAGGAAGC  
>N5843  
CCUAGGAUUCSCCCAGGAGACUGCCUCCUUCAGUUCUCCU  
>N5844  
GGGCUUGCUGUGAACUCCAGACUGACCUGAAGCUUCCUGAA  
>N5845  
GAUGAUUGAGCCAAGUGUGAACUGUAAGUGUGAGCAUGACG  
>N5846  
GUAACCCAGGUUGGAUUGGAACUCAUCGCAAUCCUCCUGCA  
>N5847  
GACCUGGGAUCAGCUUUGAAACUAAACCAGAAAUACUCAG  
>N5848  
UGUGCUIUAGCCACCUCAAACUUCUGAUUCAUUGCUGCA  
>N5849  
UGAGGAGAGUUACAGUGAAACUAGCCUAUAGAUUCUGAGU  
>N5850  
CACGUCCAUCUGACGGCAGAACUGUUGGAAUUUUUGAGACG  
>N5851  
GUUAGUCUGGUUGGCUUGGAACUUGCUGUGUAGACUAGGCU  
>N5852  
ACCACCUUGGCUGCCCUGGAACUUGCGUUGUAGACCAGGCU  
>N5853  
UGUAUGUAGCUAACUGAAAACUGACAGACUUGUCAUAUAA  
>N5854  
GCAGAAUGGAUAAUGUGCAAACUGCACAGAGGUAAGGCAGA  
>N5855  
CACAUCCCUGAAGCUUCAAACUGUUUAACUUGAGGUGUAU  
>N5856  
GAGACAUAAAGGAUCCUGGGGACUCACUGGCCAGCCGACCUG  
>N5857  
AGAAAUGCAUUAUUAAGAACUCUUAACUCCAGGAUAAU  
>N5858  
CCCAUGAGGAGAGAGUGAACUAUCUCCUGUAAAGAGCCC  
>N5859  
CAUGUGUCUGCUAAUACUGAACUUCAUUGAAAACUAGUCUA  
>N5860  
GUCCUGUUUACCAUUUAAAGACUGUGCCUUGUCGCCUAACC  
>N5861  
AAUUAUCAUUCGUUUUGUGGACUGAGAACAACUAGCAGAGCU

>N5862  
CUGGAGGAUCAGAGAUGGGAAACUAUGAAAAGUUUGAUCUUG  
>N5863  
GAGUUCUGCACCUUUAGUGAACUAGUUCUUUGGGUAUAACC  
>N5864  
AUAAGACUUUAAAAUGGGAAACUUUAUGCCCUGAAAAGCUA  
>N5865  
GACAGUUAUUUAUAUAAGAACUUGUACAAAUAUUUAUAUC  
>N5866  
UGUGUGUGUGUCCAGCCAGAACUUCAGCUCACCUGGCCAGU  
>N5867  
GAGAUGGAGUUAAGUACAAAACUCUAAAUAUAUCAAUAUAG  
>N5868  
UCGGGGGCUUGAGAGGAAGAACUGGGACUCGUUUCUACAGG  
>N5869  
GAGAGAGAGAGAGAAAGAGAACUUCUGAAAUUCUUCUCUAC  
>N5870  
AGGUCAUACAGAUCUGCCAAACUGCCUAGGAAUACAGCCAA  
>N5871  
CCUCAUAAAGCGUUUGUAAACUGAAUCUCAAACAUGUUC  
>N5872  
GGACUAUGUAAACCUUGUGGACUGGGUAGGGGUUUUUGGGU  
>N5873  
UUCUCCGUCUACCCAGAAGACUGGAUGUAUAGAAAUUUAG  
>N5874  
CACCAUCCCCCUGCAGCAAACUGAGGGGAAGGGGUAUCUG  
>N5875  
UGUCCAAUUGGUGCUUGGGGACUGAAGCCACGACUCUGUGC  
>N5876  
CUUUUUUUUAUCCCUCAAACUCAUCCUGUAAGUACUAU  
>N5877  
UAAGUCUCUCCAGCUCUGAGACUGCUUUCUUUCCCCAGCU  
>N5878  
CAGGUGACCCUCUUUCUAAACUACAAUUGUUCUGGGGGUU  
>N5879  
AUCACAGCAACAGAAACGAAACUAAUACAGGAAGGCCGGUG  
>N5880  
UUAUUUUUAACAAUGAAAAGACUUGGCAGUUCUGACUUUCU  
>N5881  
AAAGCAUACAAAGUUUGCAAACUUUGGACAGAAAGUAAAGC  
>N5882  
AACUGAAUUGUUUCUAAAGAGACUUAACCUGUUAGAACAAAG  
>N5883  
GUCAGAGGCAGUAGAGAGAAACUACUAUUGCUAUUUUACUA  
>N5884  
AGUCAACUGUCAGCCUACAGACUUUCUCUAGUCAUAAGAAA  
>N5885  
AGUAAAACCCUAACUAAUAAACUUUAGAGAUUGAAAGUUAA

>N5886  
UGUGGAAGGAGAACAUUUGGACUCUCCUUCUCCGUGAACA  
>N5887  
GAAAGACUUGGAUGAUAAAAACUUCAAGAUAUUGAAGAAAG  
>N5888  
AGUAAAUAGGACCUCAUGAAACUGAAAAGCUUCUGCCCAGC  
>N5889  
AAUUGAUAAAAUAUGUAAAACUUUAAAAGGGAAAGAAAA  
>N5890  
AUGAAGCAAAAUACAAUGAACUAACCUACUAAACCAAUAC  
>N5891  
AAGGUCCAGCUCUAGAGGAAACUGGGAGGAACAAUGAUGAU  
>N5892  
UCUACAGAGGCCUUAUUGGGACUAACAUAGAGAAUAAUCAA  
>N5893  
GGCCAUGUGCUACUUGAAGGACUAAAGAUGCAACACUUAUC  
>N5894  
UACACUUGGAAAUUCUGUAGACUGUUUUCAAUGCAUCAA  
>N5895  
UAACGAGGUGAAUGUUCUAGACUUCCAUCCUACAUUCCGGA  
>N5896  
UGGUACUUCUAUUCCUAAAACUGUGUACACUCAAUUAUU  
>N5897  
ACACACACACACACACAGACUGGAUAUUGAUCAUAUCCU  
>N5898  
GGAAAGAAACUGAACAAUGGACUGGGGAAUGAGACAAAGAA  
>N5899  
AUGGAUCUGGCUUGGACUUCAUUUGAGGCUAAAUA  
>N5900  
GACUUUCAGAUGGUCUCAGGACUCUAUGAACAAAAUGAUC  
>N5901  
UAACCUUCUAGAAGGCUGAACUGCUUUGGAUGAGCUAUUA  
>N5902  
UUUAGAUUGAUUAGCUUAGACUCAUAUUGUGGAAAUUUG  
>N5903  
CCUGUACCAGACACAUGCAAACUCAGGACUGAGAAAUCCC  
>N5904  
UUCUUUAUUCUUUAUGGAACUUAUCAGGGUGGCUUGGCC  
>N5905  
UGGGCCACAGUGGUGCCUGGACUAGGGUAGCUCAGUGGUAG  
>N5906  
UCUCGGAAGAUCGGGAUCGGACUCUUGCUGGGGCCCGGGUG  
>N5907  
AGACAACUCGAAGGUUGAGGACUGACUGCCUAUGAAACGG  
>N5908  
CUUGAUGCAUACUUGAGGAAACUCCCGGGCUCUGCUAUGUG  
>N5909  
GGAGCUUGGUUCUAGGAUAGACUCCCAUGACAGAGGAGCAA

>N5910  
GUGCUGGUUGAUUUCUGUGAACUUGACACAAAUCUAGAUAU  
>N5911  
UUUAAGUCUCCCACCCUUGGACUAAUUAAACCCAGGCUUUUA  
>N5912  
CAAACAAACGUAAUCAUUAACUUUUCCCAGGAUCCUGCUG  
>N5913  
GGCAUAUUUUGUAGUGAUGAACUAAUUGUAAUUUUACAGAUG  
>N5914  
UUUUAGUGCCAGAACUGUGGACUGCCUUCUAGGGAAGUGUG  
>N5915  
UGAAGAAAGCCAAGAAGGGAACUCAAGACAGGAACCUGGAG  
>N5916  
UCCCCACUUUGAUGUGCAGACUUCUAAAAGGAGGCUUUCU  
>N5917  
UGAGGAAUACCCCAGAUAAAGACUGGCCUGCAUCCAUGCCUA  
>N5918  
AGUUUUCUGCAAACCACGAGACUGCAAACAUCUCCAGACUU  
>N5919  
AACCAUUUAUUCUUUUAAAAACUUUAUUCAGACAACAUGAA  
>N5920  
CUUUAUUCAGACAACAUGAAACUUACCUAUGUGGGUGAUGC  
>N5921  
GGAAAUUAUAUCUUGUAGGACUCUCAUUUUACCAUGAUAU  
>N5922  
GGAAGAGCAGGAGAGGAGAGACUCCCAAUUUUUAAGGAGAA  
>N5923  
UCCUUGCCAAGCUUAUAGGACUCUUAAGAGAAUUAGCAUA  
>N5924  
GGGAACCCUGUGAGAAGGGACUGUAUGUGCUUCCCAUGGG  
>N5925  
CAAAGGUGGCUGAGGUUGAGACUCAGUGUUAGGACACUUGA  
>N5926  
GGCAGAAAGCUUUUGGGGGAACUGAGGAAGUUCUACUUUGA  
>N5927  
AUUUUCUCUCCCUGCUCGGAACUUUUCCAGAUGCCUCGGGC  
>N5928  
AUUCCUCCUUUGAUCCCCAAACUCCUUUCAAUUUUAUUCGAG  
>N5929  
ACUAGGACUUUCUAAUCAGAACUGUAUCUCCUGUGUCUUAU  
>N5930  
AACAAUUUUGUGGGCUUCAGACUGUUGGCUGAAUGAAUUA  
>N5931  
CCUUCUGAGAGAUGUAGCAGACUUUGUUAUGUAGGACAGAU  
>N5932  
GUGAGAAGUAUUUAGACUAAACUUCUGGUUUUGUUGAUGGA  
>N5933  
AAAGAGGCCAGCUUCAAAAGACUACACACAGUGAGUGGUUC

>N5934  
ACCCAACAAAUAAAUAAGGAACUAUUUUUAUCAGCCUAACCU  
>N5935  
GCAGUUCAGGUUCUAAUGAGACUCUGGUUCAGACAGUGUCA  
>N5936  
CCUACAGGGAGGAAGCUAGAACUGCCUGUCUACUGAAAGGG  
>N5937  
AUGGGCGUAUUCAUAUGUGGACUUUUACCAGAAUUUAUAGG  
>N5938  
UUUGUAUGUGUCUUUCAGAACUACAGUUUUGCACUAGAA  
>N5939  
AAACUCUCCUUCACCCCAAACUGGUUUUGGGUACUGUUCU  
>N5940  
UGACUUAAGCAAACAGACAAACUAACAUGAAGUUGUUUCAC  
>N5941  
AAUGAAGAAACAUAAGGAAACUGAAUGAUUUUGAUCUUGU  
>N5942  
AUUCUAGGGUCUGAAUUAAAACUAAAGAACAGCUGGAAAAG  
>N5943  
UUAUAGCAGGGCUUCGGUGAACUUAGAUAUCAAGAGAGGAA  
>N5944  
AGAGGGCCAGGAGACCUUGGACUGCAAACCCUGAGGCAGUG  
>N5945  
GUGGCACUCUGUCCUGCUAAACUAAGCAGUCUCCUUUGCUG  
>N5946  
UGUAUCCUCCACAAAACUGAACUCUCCCUGUGGCAGAGAAU  
>N5947  
GUGGCGGAUCUGCCACUCAAAACUGACAGCCUCCAGCUACCU  
>N5948  
AAUAGGUCUCCUGGAGCUGGACUUACAGAUGAUUGUGGGCA  
>N5949  
UCCUUUAAUGAAGCUAUUAGACUCUUAAGAUUGGAAGCUUU  
>N5950  
ACUGGAGGAGAGAAAGCAAGACUUUCCUCCUGUGCCCUUA  
>N5951  
UGGGCUUGAAAGGUAGUAGGACUUAGACGUGUCUCUGGGGG  
>N5952  
GCCUUUAAUUCAUAACAGAAACUUUUACAGUACCUUUUUUG  
>N5953  
AGAUGGACAGAUUAGAUAGACUUAACCAGAGUUGAUCUAC  
>N5954  
UAUCAAUAAACGAAGAAACAGACUAAAAAAAAAUACACAGUU  
>N5955  
AAAUCCAUAACAGAGUUAGAACUAAACAGACAAUGAGCUUU  
>N5956  
AGAUGCUGCACAGCUGUUGGACUAAUGAACUCACAGCAACU  
>N5957  
CCAAAGACAAUAAAAAGAAAACUGAGAUGAGAGUCAUGCAA

>N5958  
CAGGUUAGUUUUCUAGAAGAACUGUUAAUGUGUCCAUUACA  
>N5959  
GGCUGUAAGCAACUCUCAAACUGUGGUCGUUUUAACACG  
>N5960  
UCAAAAUUACCAGGAGGGAACUGGAGGGUUGGUUCAGAGG  
>N5961  
AAUACACAUAAAUAAAUAACUAAAUUUAAAUAAGACU  
>N5962  
AAAAUCCUAGGCUGUUUAACUGGUUUUUAAAACUUAC  
>N5963  
UCAAGAAAUUCCCCAAAGACUUGCCUGAAAGCCAGUCUC  
>N5964  
GGAAGCAGAGCUGACCAGAGACUAGGGUGUGCUUCUUCUUG  
>N5965  
UUCUGUCUCUACCUUCUAGAACUAAGAUUAUAAGCAUUUGC  
>N5966  
UUGAAAAGAUUAUAUGAGAACUAUGUGAAAACCACAAGCA  
>N5967  
UUCUUCAUUCUAAAAGGAGAACUUAUUGGGGUUUUAUAGCAG  
>N5968  
CCAUGAAGACUCUAUUAGAACUAACAGAAUUUGAAUUUU  
>N5969  
GUUCUAGAUUCCAUGAGAGACUCUGUCUAAAAUAUAAGG  
>N5970  
UAGGUAGAAGAACGCUCAAGACUCAACCGACAGAGUUCACC  
>N5971  
GCAGUUCAGACAAUAGCAAACUGAACCGUUCAGGAAC  
>N5972  
GGUCGAGAUGCCACGCCAGAACUCGGAUCCCACCUCAGAAA  
>N5973  
UACUUAGCCACUCUUUAAAAACUUGAUCUGUAUAAAGCUAG  
>N5974  
CUACCCUCUCAGUUUACAAACUAUUUGGUUAGUAAUAUGU  
>N5975  
UGAUGACAAAUAUUUGAGAACUUAUUAAUAACUCCCUGAC  
>N5976  
AGAGAAAGAUGAUCACAUAGACUACAGUGAAAAGUACCUUU  
>N5977  
UUAGCCAAAGAAUUACGAGAACUCCGCAUUGAAGAAACAAA  
>N5978  
GCUGUCAGUGACAUACCCAGACUAAUGUAAGAAAUGUUUGU  
>N5979  
UUUUGCUAACAAUACCACAGACUUUGUUCACAGAACAUGGU  
>N5980  
GGAACAAUCUCCUACUUAGACUGGCCAGAAUUGGCAGGUU  
>N5981  
GGCAGUCCCACGACUGGGAGACUCUCUGAAGCGAAUGAAUU

>N5982  
GGAGCAAAGGGAUUACAAAACUAGCCAAUAAAUGUACUG  
>N5983  
AUUCCUCUGUUAUGGAUGGGACUUGAGAAUAGUAAAAUCA  
>N5984  
AGAGUACAUAGCCAUGCAGGACUUCAUCCACUCCCUAUAGA  
>N5985  
AGUCACUGUACACGUUUGAAACUGUGACCUGAAGCGUUGGU  
>N5986  
UGACUUGACAACCAUUGUAGACUCUCCUAUGCACUUAGAGC  
>N5987  
GGCUUUGACAAAUUCUAAGACUCUAAUCAUGUUAUGUUCC  
>N5988  
GGGACUAUUCUGAGUUCUGGACUAGGGGAAAUCUGUAAUC  
>N5989  
AAACGGCAUGUUUAAAAGGGACUUUCCAUUUUGACAUUUUA  
>N5990  
GGCAGAUCUCCAGUCUGAAACUUUUUAAUUUUAAGUAUGCU  
>N5991  
UUGAAAUCAAAAUGGCAUAAACUAUGUGGUAAUUUUAGUU  
>N5992  
GAGGAUUCACAAAUGUCCAGACUUCUAUCAGGACAGGAAUA  
>N5993  
AUAGUCAGCCUCAAGAGAAGACUUUGGCCAAUAAGGGAAUA  
>N5994  
GUGGAUCAGGCAGGCCUUAAACUCACUAAGUGCUGGGUUA  
>N5995  
CUUAUGUUGGAAAGCUUUGGACUUCCCUCUGUUAAGAGGAA  
>N5996  
UCACAUGCACAGAGUAGGAGACUAUGAGUGUGCUCACUUCU  
>N5997  
AUCUGGGGAAAGUUAACAGGACUCAAAUCAUGAAAGUGGAU  
>N5998  
UACACUCCUGAAAGUCCAGACUUGUCAGGACCUGAGGGCU  
>N5999  
UUAGCAAUAGAAACUUAUGAACUGCCUGCUGAGCACAGGGC  
>N6000  
CUCCUGGGAUGAAGAGGAGACUGAAGGAUCUGCUCACAU  
>N6001  
AAUGACUUUCCAUCCCCAAACUCCACAAUCCUCCAAAAG  
>N6002  
GCAUCUGGUGACUUUGAAAAACUGUAGAUAAAACUAGCUG  
>N6003  
UACCAAUGAACAGUGUCCAAACUCACAGGACUGCAAGGAUU  
>N6004  
UCCAGGAUUUGAGUGGGAGACUCCCUGCCUGAGGCUGGCC  
>N6005  
AAAGAACUUGUGUGGGUGGACUGUUCUCCAUUUGAACAU

>N6006  
UUAGGGUCCCCACAUAUGAACUCUAUUGCACCCUUAUUGUC  
>N6007  
ACUAUUACACAUAAAAAAAAAACUAAAAAAAAAAAAAAAAAA  
>N6008  
CUACCUAAGGGGUACUGGGAACUGAACUUGAGUCCUCUGCA  
>N6009  
GACAAAAGAAAAACAUUAGAACUAGGUUAUUGUGUCUAAU  
>N6010  
UACUCUUACUCUAUAAGAGACUAUAGCUUUUAUAGGUAGC  
>N6011  
AAGGACAAAGCUGCAUAGAGACUAUAAUUAUGUUCUUUGC  
>N6012  
UCAGCCAGGCUAUUGUUUAAACUUUCUAGAAAACCCAUUC  
>N6013  
UGUCCACUUGCUCUCUCAGAACUAGGAUGUCAGCUAGCUUA  
>N6014  
AGAGAGAAUUGCACCAAAAAACUUC CAGUUGUAUGUGGUGG  
>N6015  
AAAAACAACAACAAAAAAAACUGCACUCAAAUGACAUCUC  
>N6016  
CCCCAAAUUCUACCAGAGAACUCCAACAACUGAUAAACAC  
>N6017  
UUUAGUAGUAGUUUGACAAGACUUGAGAGUAGUUUUAUAGA  
>N6018  
CCUGGGCCAGAAGGCUGAAGACUGAUGCUC CAGCUUCCUGA  
>N6019  
UCAGAUAGUAUACAAGAUAAACUGUAGUAUAACCAAUAUGG  
>N6020  
UCAGGGCUGCUUGUGCAGAAACUGAAGUGUCAUUAUUUUA  
>N6021  
GAGGUAAGCACGAACCAGAAACUUUUCUUUUUCUAUCUUC  
>N6022  
UACCUCAUAGGACUGACAGGACUCUCCCUCUGUCUAGGGU  
>N6023  
AGUAACAAACUGACCUCUAAACUUAUGUAGGUUGGUGGCAC  
>N6024  
AGUGGAAGAUACAUGGUGAAACUCAAAAUGGCUGAUGCUAU  
>N6025  
UUGCUACAGUGAGAGAAGGAACUGAUAAAGGGGUGCAACGA  
>N6026  
UGC UUAGCAUACCCUUUGAGACUCCUAUGGUGACAACUAAG  
>N6027  
UCUGAGAUGC UAGUGC UAAACUCAGACAUUCUGUGUACUA  
>N6028  
AGUUACUAAUCUGAACUUAACUGGUUUUAUUUAUUUAUGUU  
>N6029  
CCAUGGUUACCAUCCUGAAGACUUCAGAGAUAGGUGCAAAG



>N6030  
GGAAAAAAGUUGAAAAUAGACUGAAAUUUAAUGUAACUCA  
>N6031  
CUAUGCUUGGUAGUAUAUAGACUAAUUCUUAGGCAAUGGA  
>N6032  
GAGCCUGAAGGAAUCUAGGGACUGCCCCACUUGGGGAUCUA  
>N6033  
GAUUGCUGGUAGUAGUGUGGACUGGAAGCCAGGAAAGGCAA  
>N6034  
ACAUUGGGUGGGGAAAAAGGACUGAGGACCUGAAUGCCAGC  
>N6035  
AGGCUCUGAUGGAAAAUAGAACUUUUCCCUCAAAGGAAGCC  
>N6036  
UGGUUGAAACUAUAAUCCGAACUUAAGAAGCUAAUGCCCU  
>N6037  
CCAUGAACUGGAAGCUCAGACUCCCCCCCUGGUCAUUUUG  
>N6038  
AUAUGUUAUUCUUAACAAAGACUUUCAGUUCAAUAAAUGUU  
>N6039  
GACUAGGACAGAAACCACAGACUUCAGUAGUUUGUCUACCA  
>N6040  
GUUAAAGCUGGCAUAUGAGAACUGGAACUUUGUGGGUAUG  
>N6041  
AGGAUGUGGACUAAACAAGGACUUAACCAUAUCCUCCACAUU  
>N6042  
UUUACAGUGC UUAAGAUAAAACUCAUAACUUCACACAUAUCU  
>N6043  
AAAUCACUAGAUUCUUAAGACUCUAGUGUCAGAUCAUUUG  
>N6044  
UACAACUUUCUACAACAGAAACUUGGUUAUGACUAAAGAAA  
>N6045  
UAGUAGUGCAAUAAAACUAGACUCACUCCUGUGCACUGUAG  
>N6046  
ACCGGGGAUCAAUUUGGGAGACUUAACGGUACCGCCGUUCC  
>N6047  
CCACUUGUCCUUGCUUUGAAACUUA AUGGGUAUAUGUUGGC  
>N6048  
UGAAAACCCUUUCACUUUAGACUCCAGCUUCCUAGCUAGUU  
>N6049  
UACAAAUGGGACCUCAUAAAACUGCAUAACUUCUUUAAGGC  
>N6050  
GGAAAGUACAAUGGGGCAGGACUUGUGUGAGGGAAUACUGG  
>N6051  
AGAAUCGCAAUCCACAAGGACUUGAGAUGCUCAGUGAG  
>N6052  
UCUCCUUUUCUGUACUGGAAACUGAACUUGGUGUCUUACAA  
>N6053  
GGGCUCGAGUCAAAAGGGAGACUUUUAUGAUCAACACUGAG

>N6054  
AUUGAUCCUUGCUUGUUCAAACUGCUUUUUUUGAUAGUGCA  
>N6055  
GGUUUUUGAGGAACCUCUAGACUGAUUUUGCAAAGUAAUUGU  
>N6056  
UUAAGAAAGUCACAAGAUGGACUGAAGAGAUGGCUCAGAAG  
>N6057  
AGCAUGAAACUCUAGGUAAGACUUGCUACUUGUUAUGUAUU  
>N6058  
ACAAAUGGGAACCACCUCAGACUCCAGCAUCCUAGUGAAAC  
>N6059  
UGUAAAUUUGGAGGGGGAGAACUCAUAAAAAUUUGUGGAA  
>N6060  
AUCGUUUUGUAUUUGUGAAAACUGUCAGUGUGUCUCUCUCA  
>N6061  
AAGUGUAAUUGUUCAUGGGAACUCUACUUCAGCAAUGUUG  
>N6062  
ACAGAUAGAUAGUUUAAUAAACUAGGGUAGGAAGACUCAGC  
>N6063  
UAGAUGAAGAUAGAAUAAAAACUUCUGAGUAAGGUAAUUG  
>N6064  
AAACAAUUCUCAGAGACGAAACUAAUACAAACAUGAUGAAG  
>N6065  
AACCCAUUGCUGAAAAUAAAACUUGAACCUUGGUCAGAAA  
>N6066  
GAAUACCCUGAUAGGUUAAACUUGUUGGCCAACAAGUGCC  
>N6067  
CCUUGGGACUUGCCUAUGAAACUCAGCUCUUGGAGACCCUC  
>N6068  
AACAAACUGAUAACAGGAAGACUGGAUACAUUUGUGCAAGG  
>N6069  
CCAAAGAAGGAACUUAAGGAACUCUGAUGUCUUCAGAUGUA  
>N6070  
AAACGGUGGCAGAGGCAGAGACUAGGUCUCUCUGGGAAGCU  
>N6071  
GAGUUUACAAGUAAGCCUGGACUGCCACAUCUAGUUCAGG  
>N6072  
UGUAUAUUUUUCCCCACAGGACUAAAUAGGAGAAGUAAAUA  
>N6073  
UCAAAUCCUCACCCAAUAAAACUACAUAUAGAAAGCAUUAAG  
>N6074  
UUAUCCUUGUCUGCCUCAGGACUUUCCAAUCUCAUUUUUUC  
>N6075  
ACUUGAAGUAGGCGUGUGGAAACUUUGGUUCUAUUGAUGUGC  
>N6076  
ACCUCACCCCUAAGCAAAGAACUACAGACAGCUAAGAAAGG  
>N6077  
CAUUGGGAUUUGACAGCAAGACUAAGUCUAAAAGGAAGGAA

>N6078  
AAUUAGGUGAGCCAAAGGGGACUUGCGGUUGCUGGACUUCA  
>N6079  
GACUUCAUCAUUUAAAUGGGACUGUAGACACAGUAAAUGAU  
>N6080  
GCAAAAAGUUAAAAGAGUCAAAACUACUCAAUUCCCAACAUCU  
>N6081  
UUCCACAAUAGUUUCUUAGAACUUUUACCUACUAAUUCUUU  
>N6082  
GUGCUGGUGUACAACACAGGACUAAUUUGUUUACUUAUCUAA  
>N6083  
AAAGCUAAGAAUCUCUUUAGACUUGCUGAUCAGUUCUUGAU  
>N6084  
CCAAAUGAAGACUACUUUGAACUAGAAAAUAGGUUGAUACC  
>N6085  
GAUGUUCUUUCCUUUCUAAACUUUGGCUCAAAAAUUCAG  
>N6086  
GAGCAGCUGACCUUGGUAAGACUGUCACGCCCAUGUGCCCA  
>N6087  
AGUUGACAUAGAGGGGGAAGACUUUAGAGGAAGUGGAAUA  
>N6088  
ACAAAACCUGCAAGUCAUAGACUUGGAUGGUUCCCAAGCU  
>N6089  
GCUUAUAGUUUGACUUAUAGGACUGAUUUUUAGACAAAGUA  
>N6090  
AUAAAAGAGUUUUCUCUGGACUCAGGCUCUGAUUCAGUGU  
>N6091  
GUGAAGCAUCCCUCCAAGAACUCACACAUUGAAGGCAUGU  
>N6092  
UAAAGAACAAUGGUUUCUGGACUCCCUUUGUGGGCUGAAAG  
>N6093  
UUAGAGCAUUAUGGGUAAGAACUAAGAGUAUUGAUAGAGGA  
>N6094  
UCUUGGUCUCUCCUUUUGAAACUUGAACAGAAACACCUCAU  
>N6095  
CUGAAUGUUCAUACAGUUAAACUUACUUCUAAAUAUUUGUG  
>N6096  
GCUCAUGUAGGUAUGAUUGAACUCACAGCAGAGGCAGCUGA  
>N6097  
ACUCGUCAGAGUGAUCUUAAACUCUUCUCCCAUUGUUAC  
>N6098  
ACCUUGGGAUAAACAGCAGGACUCGUGGCUAAACUGAGUUG  
>N6099  
CCUGACUUUAUUGAUGAUGAACUGCCAUGUGGAAGCCAAAU  
>N6100  
AUUAAGCAUAUAUAUUCAAACUAUGCAGGUAAGCUGCGGC  
>N6101  
AUAAAGAACUGAAAGUAAAAACUCAUAAAAGAUUAAAUAUU

>N6102  
GACUAAACAACAAGAACAAAACUAAAUAAAACAGAAAAAA  
>N6103  
CACACACAUGAAAGGUUGAAACUCAUCCUAUCAGCCCAUGU  
>N6104  
GAAAUAAAUGUAAUGAAAAAACUGCAUGGCUAAGGAGAUGU  
>N6105  
CAUCAAUUUAAUAAAAGAAACUUCCUAAUGCUCUCUUUGA  
>N6106  
CCCCACCCACUCCCGUGGGACUGUAAAAGCCCUCAGCUCC  
>N6107  
CAAUGCCUCAGACCCAUAGGACUGACAAACAUUCCUCAGGU  
>N6108  
GUCUGAGGGAAGUAUUCAGGACUUCUUCAUGCAAAGGAUGU  
>N6109  
GCUCAAGUAGCAGAAACCAAACUCAAGCCCUCAUUAUCCAG  
>N6110  
UAUUC CAGGUGAAUUUGCAGACUGCCCUUUCUAAUUCGUUG  
>N6111  
CGGCUGUCUUAAGCUAGGAACUGUGCCUGAGCAAGAGUU  
>N6112  
AGCUUCCCUUGCCAGUGAGGACUAAUUAACAGGGCUGUUCU  
>N6113  
UCAACCUGAGUUAGUUUAGACUCAGUAGAAUAGGUAAGA  
>N6114  
AUUUUUUUAUUCUGAAAAUCAAAACUUGGUUUCGAUAAUUUGGG  
>N6115  
CAAGUCUUCUACAAGUGAAGACUGAACUACUGAAUAAGGAG  
>N6116  
AACGGCGCUACUUUAGGCGGACUUGCCAGUGUGCAGCAU  
>N6117  
UCUAUUUUUUAAUUCAUAAACUAGGCUGUUUACAGUCCC  
>N6118  
GUUUUGUCUUUCUACAUGAACUCUGGGAGUCUCAGCUCUG  
>N6119  
GUAUUGCCUGCCUUUAUAAGACUUUCAUGGUGCAGAAUUGG  
>N6120  
AUCUCUCUGCAGAGAAUUGAACUGUCAGCCUUUGAUGUAAC  
>N6121  
CAGAAGGGAAACAAAAAUGAACUAAGUUGUGUUGUCAAGU  
>N6122  
GAAGUUUUUUUCGCUGUGAACUCCCGUCAUUCUAGACAUC  
>N6123  
GUUUCUGGUCAGGUACAGAACUCGAAACCUAGAAAAUUCU  
>N6124  
AGAAAACCCAGGGAGGCGGGACUAACUAGAGGUGGUAGAU  
>N6125  
UUCAUUGAUCGGUUUUUAGGACUUUGCAUUUUUCUAAAUAU

>N6126  
GUGGCUUAGCAAGUAAAGGAACUUGUCCCCAAGUUGGAUGG  
>N6127  
CCUGAAGCUUCAGGAAAGGGACUGAAUGUGGGGCGUCAUUA  
>N6128  
GAUAAUUGACUCCAUGAAAACUGAAUUACCUCAACAAGGU  
>N6129  
GAAGAAUUGGUCAAUGUAAACUUUUCAAUUGUAAAUGUA  
>N6130  
AGUACUAGUCUGUAGGGAAAACUUGUUCCAUAUUUUGUAU  
>N6131  
CUAGAGCUAUGGCUUGGGAAAACUGCUUGCAAAAGAGCAUAA  
>N6132  
ACUUGGCCACCAUUGAGUAAACUUCUCUUUAAAUUACCUAG  
>N6133  
CUAGGCAUGUAGGAGAGGAGACUAGUGUAUGUCAGAGGAGC  
>N6134  
UAACAAACAUCACCCCCAGACUUUCAACCCUUUAGUGUCA  
>N6135  
GAGGACCCUUGAACUCAUAAAACUCACAGCAGCCAUGGCCAA  
>N6136  
CUGUCAUCAAGGAUGGGCAAACUCUUAGAAGCUUCAUCAUG  
>N6137  
UAGAGAAUCAAGGAGAUAAAACUGUCCCCAAUAGUAAAAGCC  
>N6138  
GUAAUCCCUUGAAGUAGGGACUAGGCUCAGGGUAGAAUA  
>N6139  
AGCAAGCCAUCAUAUAUAAAACUAUUUGGGGUUUUUAAA  
>N6140  
GAAGGUCACUUUCACUUCAGACUUCCCAUGUGUGGUUCCAA  
>N6141  
GGUCAGCACCUGAGUUACGAAACUUCCCCUGAAAACCUUCAC  
>N6142  
AGUUAAGUUAAACACAAUAAAACUUCUUAUGUUUCAGUAGA  
>N6143  
UCUUUUUAGCAAGGAUGGAAAACUUGUGGUUUUGAUGUGAUU  
>N6144  
UGACCUUGGUAAAUUUUGAAAACUGUACCCUCUACUACAUG  
>N6145  
UACACAGAUAAACUUUAUCAAAACUGCAGACAAGGACAGUUGG  
>N6146  
CUGCAGACAAGGACAGUUGGACUUGAUGUGAGGACAAAGCU  
>N6147  
AGACUCCUGCCCUGUCCUGGACUGAGGCACAGCCUGCAGGG  
>N6148  
CUGAAAACUAAGUCCCUAAAACUCAUGCUCUUUAGAUUUA  
>N6149  
GAGCUCAAGUUGCAACCCAGACUGGUGUGCACAUGCUGUUU

>N6150  
UAUGCAGAUGUGGUCCUAGGACUGGGAAGGUAGGAAGAUCA  
>N6151  
AAUACAGUUUAUCUUUAAAACUGAUAGAUGCACAGAAACA  
>N6152  
UAGCACACACAAGCCUUCAGACUGGAUCCCUACUAUUAAA  
>N6153  
CUGGAUCCCUACUAUUAAAACUUGUCCUUGCAUACUUUAU  
>N6154  
GUGUAAAGGGGCUGUGAUGAACUCAGUAAUUAGGAGACAGC  
>N6155  
UAGUCACUAAGGCCCUAAAAACUUUCCUCACCCCAACCCC  
>N6156  
GAAAUUCUAUGCAGACCAGACUGGUCUCAACUCUGAGUG  
>N6157  
CCUCCCAAGGGCUGAAACAAACUUUAAAUUAAAAGUCAUG  
>N6158  
UACACACACAUAAUUUGAACUUUCAGGUAAUAAUGUGUGU  
>N6159  
GUCAGCAGCCUACAAAUCAAAACUUUUUUUGACCUAGUAUUU  
>N6160  
CCAGAGACCAAGUAGCAGAAACUCACCCUGUGCUAGAGCCUG  
>N6161  
CAUGAACUACAGUUUCUAAAACUCUGAUUAUCUAUGUAGCUA  
>N6162  
ACCCCUUCCUAUUCAGAAAACUGUUGCUCCAUCCUCAUA  
>N6163  
UCUCUCACAUUUGUAGGUAAACUGUUAAUAAAAGUAAUAAA  
>N6164  
GUUAGUGGAUGGUUAGGUAAACUUUAAGAAUAUUCAUUGCU  
>N6165  
GAUUGGUCCUGAGUGACAAAACUCUGUACUGAGAUUGAUAG  
>N6166  
ACCCAUCACCAUAUAUGUGGACUUUAUAUAGUUUGACAAGU  
>N6167  
AUUUCUAAUCUAUAUGCUAACUUUAUGCUGAUAGGAUCAC  
>N6168  
AAUAAAACUGUUUUCUGAGAACUGCAAGUGCUCUGAGCUGC  
>N6169  
UUACACAAGUAUGAUUCAAAACUGAAAGGAUGGGGAACUUU  
>N6170  
GAGUUAGUGGUUUUAUAUGAAACUGAAAGAGAGGGUUAUUGU  
>N6171  
UUUUUCCUCAGACUUUGGACUUAGGGAGGGAAGACUGAC  
>N6172  
UAUCUUUUGCCUCAUUUCAGACUAAAAUGUUAACAACUUU  
>N6173  
ACUAAGCCUUGAAGGGAGGAACUGAUGGAGACAUCCCAUUU

>N6174  
AUACAAAUAGGUACCUAAAAACUUAAAUAAGCCAGGCGUG  
>N6175  
UGUGUACUCUUUAUUUUUGAACUACUUGCUUAGUUAGCUCA  
>N6176  
UCACCAGUGGGCAUGUAUGAACUGAAAACUGGAGCAGCAAU  
>N6177  
UCAUUCCCAUUUGGCAGCAAACUUAAGGCUGGGAGGGUUA  
>N6178  
AUGCUUGGUUUGGGUCAGGAACUAAGGUGGGCAUUGGAAAU  
>N6179  
UCCAUGGAGAAAACUAGGAAACUAUCAAGGCUUUUAUGAA  
>N6180  
GGCCUCAAAACCAAGACAUAGACUGCAACAUCCACAUGGCAU  
>N6181  
CAACCUAGCCCUUAGUCCAAACUGUGUCUGGGAUCUCAAGG  
>N6182  
AUGCUGACAUGGGGUCUGAGACUAGCUAGAUUGGAACAGUG  
>N6183  
AAGAUUAUGAAGCAAUAUAAAACUCCUAUCUUUCUCAAUAC  
>N6184  
ACAGAGUUGGUGAGUGAAGGACUGAUUCGUUGCUCUCAAG  
>N6185  
GCUUGUGCCCAGCAGAAUGGACUGGUCUUAUAUGCAAUGAA  
>N6186  
UAAGGGGCUAUUAGCCCAGAACUUAAGAAUACUCAAGAUAAA  
>N6187  
UGGGCGAUUAAAUCAUAAAAACUAGUACUAUGCCAGAGUAU  
>N6188  
AAGUAAAUUCCUCAUAGUAAACUGAGUGUAGAUUAUGAGAA  
>N6189  
UAUCAUGCCUAGAGAGGAAAACUAGCCUAGAAACAAAGUA  
>N6190  
AUCUCCACUCCCUACCUGAACUCUCCGGCCAAGGUUAUCU  
>N6191  
GAAAAUCUCUAUGACAAGAACUUCAAGUCCUGAAGAAAG  
>N6192  
UAUAAAGAGAUACAGCAAAAACUAGAAUAGGAAGAUUAAAU  
>N6193  
CAGGACUCAUACACAUUGAACUCAGACUGUAACAGCACAC  
>N6194  
AAGUGUAGGUGUGUCUAAAAACUGAUACAUAUCAAUUAAC  
>N6195  
CUCUAUAGAAGGAGAUACGAACUGGGUAAAGGAUGUAGGCC  
>N6196  
AACUGAAAAUUUAGUAGGGACUCAAGCCCCGGGCUACCUU  
>N6197  
GUCUUCUCAAGGAUAAAAGAACUUCUGGCGGAAUCACCAUG

>N6198  
AACCAAGCGAACAAACAAAAAACUCAAGGCAGAGCAAAGUGA  
>N6199  
CCAGGCAAUAGAUUAGCUGAACUGUGACCAGAAGCCUGGUG  
>N6200  
UGAUAAAUUUUGUCAUGAGGACUAAAUAAGAAAGCAUGUGU  
>N6201  
AGCAUUGAGAGAAGAGUUGAACUGCAAAAUCUUGGUGGAUA  
>N6202  
UAGGCUUGAUAAACACAUGAACUAAAAAAUAUCCUUUAAUU  
>N6203  
UCAGGGUCUGGUUAAUCAGACUCUUCUAUUGUUCAUACUA  
>N6204  
UUUGAAAUCAUUCUUCAGACUCAGGGUGCCAAGCCUACC  
>N6205  
CAACUACAUAUUCUUGCAAGACUUUGGGUAGAGCUAGUGUG  
>N6206  
UCCAGUAACGCUGCUGCAGACUUUAAAUAUAUUGUAUUUU  
>N6207  
UAGUUAUCAAAUUAACUAGACUAGUAUCUAAAUGGCCAU  
>N6208  
AGCAAUCCAGAGCAUCAGACUGAGGAAUCGUUGCAUGGA  
>N6209  
GGUAGGGAAUUUCUCCUAAGACUAAGACUGCCAGAGCAGUC  
>N6210  
UAGUCAUAAGCUCACAGAAAACUCCCUCUCUAAAUGUUAC  
>N6211  
UUACUGAGAAAUAUUUGAAAACUUUAUAAAUAGCACCAGUC  
>N6212  
UGUUUAUGUAGAUUUGAAGGACUGUGUAAUUGAGGGAAAGA  
>N6213  
GUCUAAGUUUUUAUACAUAGACUUUCAUGCAAUUUGUGAAG  
>N6214  
AAAUAUCUCUGUUUCUAGGACUUCAGUUACAAUGUGGAAA  
>N6215  
GUCCAAUCCCAUAGAUAAAACUCCACAGGAUCUUUGAACA  
>N6216  
CUUCUCCUUUCAACCAAGAACUACAGGUGGGCGACUAUAC  
>N6217  
AAGAAGGAAUUCUAAUUUAAAACUAAUCAAGAAACCCACCA  
>N6218  
AUUGGCUCAAUUGACAAUGAACUUUAACCCACUGUCUUUCC  
>N6219  
GAUUAGACCAAUAGAACAAACUCUGGUGUUGGCUCAGCUU  
>N6220  
UCUUUCUAUAUGUAAAGAAAACUAUUUUUGUUUAUUCUCCUC  
>N6221  
UAUUGCUGGUAGGAUAGAAAACUGAUACAACCACUCUGGAA



>N6222  
UGGUGACAUUGCUGAUCUGGACUGCUGGGAUCCUGACACCA  
>N6223  
UGUUCUUACCAUUGUAUAAAACUAGGCAUGAUGGUUAUAUGC  
>N6224  
UUUAGAAGAAUGAGAGGCAGACUAUGGUAGUGUGUACAAGG  
>N6225  
UCGUACAAAGAAAUGUCAAAACUUCAAUAACAGAUUUUUGU  
>N6226  
GCAUGGGAAUCAGACAUUAAAACUCUCCCCUCAUUUGAUUA  
>N6227  
CUUUGAAAGUUAAAUCCAGACUAGAUUCUGAUGCCAACCU  
>N6228  
GCAUCACAUUGAACCAAUGGACUCUGUGCAGUAAAAGAAAG  
>N6229  
AUGCUGCUGAGGAGGUAAGGACUCCAUAAGAAGAAACAGAU  
>N6230  
UUUAAUGGUCCUGGAAAUGAACUACAUAUAUGGUUGUGUAG  
>N6231  
UCAAAUGGGCACAUGCAUAGACUCAAGGCUUCACUCAUGAU  
>N6232  
AUCUUUUGUCUUCUGUAAAAACUGAUGCUGUGAACACAAGU  
>N6233  
UAAUCACUCACUCAGUAAAAACUCACAAGCUUUACUCCAG  
>N6234  
UUUUGGGCAAAACAUAUUGGACUAAUCAUGUGUAAUUCAU  
>N6235  
AAACAAAAACAACAAGGACUAGGUUUCUGUCUUUAGGG  
>N6236  
GACUCCAAGGAAGGCUGGGGACUGUAGUUUUUAAUGUGAG  
>N6237  
CCCUCUCAUUUCAUGUCUGGACUCCUAAUGCUGGCUACAAA  
>N6238  
AAUAGAAAAAAAUGGACAAACUCAUGGUAAAGAAUAAUUA  
>N6239  
AAUUUUUCAUAGAUAGAAGAAAACUAACACCCAGAUAGAAGAA  
>N6240  
CUAACACCCAGAUAGAAGAAAACUGCUCAGACUCUAAACCCC  
>N6241  
GAAAGGUCUGGAGCCAUAAAACUGAAGUCAGCAGGCAUGGG  
>N6242  
GACAACUCUGAUCCUGAAAGACUCAGGCAGCCAGUGUGGUC  
>N6243  
CUUAUGGGCAAUCCAAGAAAACUAUCAAGUCAUUUUUUAUU  
>N6244  
UAAUCCCUGUAAAGUUAAGACUUGAGUUCACUAUAACCCU  
>N6245  
CAUCUUGUGGUAAAUAAGAAAACUGACAGCGUCAGGAGUGGU

>N6246  
GUUAUCUGAAACCUACUAAAACUUCUCCCACUCCUCUGUCG  
>N6247  
UGUGAGUUUCAGUGCUGAGAACUGAACUUGGGUCCUCUGCA  
>N6248  
AAAUGUUGCCAUUGUACCAGACUGUCUGGCUAACUAUAUAA  
>N6249  
ACUGUCUGUGACUGUCCUGAACUGUGUGUGACAGUUAAGCU  
>N6250  
GCUUCGGAGGGGAGCAAGGAACUUGGCUGGGGUCAUUCUG  
>N6251  
AAGAACUUGUGAGAGGCUGAACUAAAAGGCAAUGGACUAAU  
>N6252  
GAAAGUUAAGAUAAUUAUGAACUUUGAGAGGAAAAGUUUGU  
>N6253  
CAUAGAAUAAAUAUAAGAGAACUGUAUGCUUUCACUGAGGA  
>N6254  
AUAGAGUAUAGACAGCAAAAACUAAAAGUAAGUAACUUGAA  
>N6255  
GCAGAUAAUACUCCACAGACUUCAGUGAAUGCGUGACAU  
>N6256  
AAGGAAAACAAAGAGCCUAGACUCUGGCCUUCAGCCAGUAU  
>N6257  
CUUGUGCAGGUGGCUGCUAAACUCUGCCAGCUGCUCAGCCA  
>N6258  
UAUUAGACUAGAUUUUGAGAACUACAUGUAAAUGCCUAAGC  
>N6259  
UUAGGGAUUGGUCCUAAAAGACUAUGUGCAUGCCACGCAUA  
>N6260  
ACACUAAAAGAUAAAUAAAACUUAACAAGAUAAAUAAAAG  
>N6261  
GGUGCCUUUUGUCCUUGGGACUCAAUGAAAUAUAUUUCC  
>N6262  
UGCUGAACUCAGAAAGAAGGACUCACUCAUUCAAGUGCUU  
>N6263  
UAUGGUAGAAGGAGUGGCAAACUGACUCCAACAUCUACGU  
>N6264  
ACAUACAUAGGCCAGUUUAAACUGUUGCAAGGGAGACCAUC  
>N6265  
UUCAAACAAAUGUAAGAAAAACUCAAAUGGAAUUA AAAAAC  
>N6266  
GAGGAAACUUUUUGAUUUGAACUCUUUACACCUAUAUACUG  
>N6267  
CACCAAGUAACUUUUCAAAAACUAAUAAUUCUACUCACAUC  
>N6268  
UUCUAAGCCUGAGUUGAAGACUUCUGGCUCUUCUCGGA  
>N6269  
ACCAGCAGCGAAAGAAAGAAACUUC CAGAAAGAUGAGCUAC



>N6294  
GUAAAUAGUAAGUAAAAUAAACUGAGAACA AAAAUGAAAAUA  
>N6295  
AGGGGUUUUGACUUACUCAGACUGCUUGUUUAUUUGUUUGC  
>N6296  
GUCUGGGGUCAGUUUGCAGGACUCAGAGACAACUUUGUACU  
>N6297  
GCUGGUUGUGGAGGGAGGAAACUUA AAAAAAAAAAAAAACA  
>N6298  
AGAAA AUGCCCUCUGAGAAAACUUCACAGGGAAGGGAAAAG  
>N6299  
CCUGCAGGACUGACUCAAGAACUCCACUCCUUAGUCUGACC  
>N6300  
AAAAUGUACCUAAUCAAGAAACUGAACGUUGGCUGUGAGAC  
>N6301  
CAAAGGGAGGGUCACAUCAAAACUAAGAAAUUCUGCCAGCAA  
>N6302  
AAUUUUUUUACUCCAAUGAACUUUUAGGUUUCAGUAAAAG  
>N6303  
GAUCUAGAGUUGUUGGGUGAACUAAUGAGUGGCAGAAA AU  
>N6304  
GAUGGUUAUUUAACUCAAAAACUAUCCACAAAUUCUGGGUA  
>N6305  
AGCAAACCAAGCUUCCUGAAACUGUGUCCCUUGCAGGUGAG  
>N6306  
UCCAUGAACUGGAUCCAAAAACUGUAAAAGAUAAAGUUGUUU  
>N6307  
AACAGGAAGAUAAAUGAAAGACUGGCUCACUGGAGUACUGG  
>N6308  
GUUAUUGCAGGUGCUUACAAACUGCCUGCUGUGGUCCAGCC  
>N6309  
UCCAUCCUGGGUGCCAAUGAACUGUUGAAAGUUUACUGGCU  
>N6310  
ACUAGACCAGUGGUUCUCAAACUGUGUGGGUCAUGACCUCU  
>N6311  
UAAAAGAAGCUAAGACUAAAACUUUGGAAAGCAAUAAAGAC  
>N6312  
GUCAGUGAGAAUCUAAACAAACUCAAAAAGGCUACGAACAGU  
>N6313  
ACUAGAUUAUCAUCCACCAGACUUAGACUUUUUAAAAUUUC  
>N6314  
ACACAAAGCAGCUAUGCAGAACUGCACAAGUCCUUCAACUC  
>N6315  
UGAAUAACAAGACAAAGAGACUGCUUUGUCAGGAUGAUUC  
>N6316  
UAGCUGUGACCUUAUGAUAGACUGCACAUCUAUCUGCAGUG  
>N6317  
AGAUUGAUGCACCACUGUGGACUACUUAAGCCCCACUCAGU

>N6318  
GAUCAGAAAACCAAGUGAAGACUGCUCACCCUGUGGAAGCA  
>N6319  
CUCUUGCCUCACUGGAGAAAACUGCAAGGGAGGAUGAGGCU  
>N6320  
UAAGGUGUUUAAGAGUGGGACUCAAAUGUAUUCUCUUUCA  
>N6321  
UGUUUGUCUGUUUGUGACAGACUAGCUGGAUUCCUAUGCAG  
>N6322  
ACUGGACUGUUACUCCUAAACUGCAAGCCAAACUAUUUCC  
>N6323  
UGAAUACUAUUUUUUUCAGACUCUCACAAAAGAAAGCAUC  
>N6324  
UCAGUGUUCACACAAAGGAGACUCAUCAACAGUUUAAGUAU  
>N6325  
AACUCAGCAAUUACAGCUGGACUAGGAAAACAAUGGCAAAU  
>N6326  
AAGAAAAAAAAAAACCUUAAACUUAGCCUUUAUACUGAGGG  
>N6327  
CUACGGAGGAAGACGCAAGAACUCCCUGAAGCUUACUGGCC  
>N6328  
UGGUGCUCCAUGGGCUACAAACUGGGAAAUCUCCAAAAUAA  
>N6329  
AGGAACUGUAUACUACGGGGACUUCAUUCUCAAUCUGAAA  
>N6330  
AAAACUCCUGGUACUGAGAACUAAGACAACUACUUAGGGC  
>N6331  
CAUAACACCUGAAUUGAUGAACUCAGAGGUCCUGACAUAGG  
>N6332  
AUGCCUCCUGGGUCACAAAACUAAGAAAAGAAUCAUGAAA  
>N6333  
GAAUGUAGUCUGGCUUUCAAACUUAAAAAAAAAAGAAGAU  
>N6334  
UUGUGGAAUGC UU AUUUGGAACUCAAGUAUGUAUCCCAUA  
>N6335  
UUCUUGUUUGUAGACAGCAGACUGUGCAUUGUGGGAUAUGG  
>N6336  
AGAGUCUCCACUGGCAAGGAACUAGAUCUAGGCUAAAGCUC  
>N6337  
CGCAUAAAUGUUAAUCAAGGACUAAACAGAUAAUUUCCUUC  
>N6338  
ACUGGUUGCUCUUGCAGAGGACUAUGGAUUGCAUCCAGAA  
>N6339  
UUAGCUCACUUAUUAUUGAGACUUUUUUUUUUUUUGGUCA  
>N6340  
UAGGAAUAGCCUAUGGAAGGACUCUGAACGUCUUCUAAAUU  
>N6341  
AUCCACAAGGACAUAUUGAAACUUCUAAAACAAUUCUUU

>N6342  
AUGCAAACUCAGACCCUAGACUUGCCUGGCAAGAACUUUG  
>N6343  
UUAUAUCAGUCAUCAUACAGACUCUACCAAACCUCUCUC  
>N6344  
CCUCUGCAGAAUACGACAAAACUGCUC CAGCCUCCUGCUCA  
>N6345  
UGAAGGCAAAGUCUCCUGAGACUACAAA AUUAUACUCUCAG  
>N6346  
GGGGAUACCAAUGUGUACAAACUAGGGGUCUGGAAGAAUUC  
>N6347  
ACACAGCCAAGUCCUUGAAACUCCUCAGGAGGCCAGAAGA  
>N6348  
UAAAAGACCAGGAAUCAAGACUUGAAA AUACCUGUGGUGA  
>N6349  
UGUUUGGGUAAUUCAGCAAAAACUGGAAACUACUGUUGCGCU  
>N6350  
GUUCCCUUCUUUACUCUAGAACUCCCUAUUCUGGAACAGGU  
>N6351  
AUAUGGGCCACACAAAUUGGACUAGAUGUCAUUUUUUUUC  
>N6352  
AAUAAACACUGUACUUACAGACUAGCAGUCUAUGAUGGUAU  
>N6353  
UUCUAAA UCAAUCAUUUAAAACUAGGAAGAUCCACUUCUAA  
>N6354  
UCAUAGGCAGCCAUUGUUGGACUAGCUGGGCCACAGCCUGU  
>N6355  
AAGUAUCACUGGGGAAGCAAACUGCUCUAGUCAUACGCUG  
>N6356  
UGCUGGAGAUUGAACCCAAGACUUCGUGCACACUACAAACU  
>N6357  
AUAUAUCAGAAGGAGAUUAAAACUAUUAACAUUUAGCAUCCC  
>N6358  
CCCAGACUGGCAGCACCCAGACUGGCAGCACACAAGUUCAG  
>N6359  
ACAGUAGAUACUGAGCAUAGACUGUCAUCAAGAGAGCUGC  
>N6360  
GAAUCCUGGCUAUGGGUGAAACUGUACCAUAUAUCAAGCGC  
>N6361  
CCACUGAAUAGAGUACCUAGACUUCCCCACCGACAGCCUUA  
>N6362  
AGCCAAGAAAACACAAACAAAACUUGUUGAAGGAAACAAUA  
>N6363  
AUCAGGGAAAUGCAAGUCAAAACUAGCUUGAAA UUUUAUCUU  
>N6364  
UGAGACACCCAGCCUCAUGGACUGAACAAACUACUGGUUAUU  
>N6365  
UGGAAUACAUAUACAGUCGAAACUAGGGAUUUUCAAUCC

>N6366  
ACUGUGUGAGUUUGACAGAAACUCACUGUGUGGCUGAAGAU

**Supporting Information S3. The benchmark dataset  $\mathbb{S}_{\xi=20}(\text{m}^6\text{A})$  for  $\text{m}^6\text{A}$  modification in RNA.** It contains 1,130 positive samples whose centers can be  $\text{m}^6\text{A}$  modified as confirmed by experiments, and 1,130 negative samples whose centers cannot be  $\text{m}^6\text{A}$  modified. All the sequences included are 41-nt long with the adenosine (A) located at the center.

**I. Positive subset  $\mathbb{S}_{\xi=20}^+(\text{m}^6\text{A})$**

>P1  
CCUUUUCUAAGUGCUUACAGACUCUCUGUUUAAUAAUCCA  
>P2  
AGCAGGGAGGGCAGGGUGAGACAUUCAGAGGAAACGACGAC  
>P3  
GGUGAGGCUACAGACAGGGGACUUGCAAGCAGGGAGGGCAG  
>P4  
AUUGUAAUUGCUAGCAUGAACCGCGUGGGCUUCUCAGGGU  
>P5  
ACAAAGAAGGGGAGGGAGGAACAUGCUUGAAAGGGGUGUGC  
>P6  
UAAGUUAGGACAGCCAGCAAACUUGCAUCAGUAUAAAUACA  
>P7  
GUGAUCUACAUAUGGGAGAACUGAGGCACAGAAUAAGUU  
>P8  
CACCGGCCCUCCACGCGGACAGAGGUCAGCCUGAGCCCC  
>P9  
GCCUUCUCUCCAGGCCUGAACUUUCUCAAGUUGACCUCAC  
>P10  
GGGCUGUUAAGGAGUUUGACUUAUCCUGAGGCAAGGA  
>P11  
UGAGCAUGGUGGAAUGGGGACAGAUGGCAGUGUUAAGUAG  
>P12  
CAAGGUCAAAGGAGUCCGAACUAGUCUCAGGCUUCAACAU  
>P13  
AUUCGAUGUUGAAGCCUGAGACUAGUUCGGACUCCCUUGA  
>P14  
CUUCAUAGCCGAAUACACAAACAUAUAUAAUAAACACCC  
>P15  
CCACUACAAUCUCCUAGGAACAACAUUAACGCACUCUCC  
>P16  
UAUAACGCACUCUCCCCUGAACUCUACACAACAUAUUUUGU  
>P17  
CCCUGUUCUUAUGAAUUCGACAGCAUACCCCGAUUCCGC  
>P18

UCUCCAGCAUUCUUUUUCAAACCUAAGAAAUAUGUCUGAUA  
>P19  
CAAAGUAACUCUUUUUAUCAGACAUAUUUCUUAGGUUUGAGG  
>P20  
UAAAUCCCCUUAUUUCUAGGACUAUGAGAAUCGAACCCAUC  
>P21  
CUGAGUAGGCCUAGAAAUAACAUGCUAGCUUUUAUUCAG  
>P22  
UAGCUUUUAUUCAGUUCUAACCAAAAAAUAACCCUCGU  
>P23  
UUCAACAAUAUACUCUCCGGACAAUGAACCAUAACCAUAC  
>P24  
AUA AUGGCUAUAAGCAAUAAAACUAGGAAUAGCCCCUUA  
>P25  
UUACCAAGGCACCCUCUGACAUCGGCCUGCUCCUUCUC  
>P26  
AGUUCUACCGUACAACCCUAACAUAACCAUUCUAAUUA  
>P27  
ACAUAACCAUUCUAAUUAACUAUUUAUUAUCCUAACU  
>P28  
UAACUAUUUAUUAUCCUAACUACUACCGCAUUCUACUA  
>P29  
GAAACAAGCUAACAUGACUAACACCCUAAUCCAUCACC  
>P30  
UAGGAGGCCUGCCCCGCUAACCGGCUUUUUGCCCAAUGG  
>P31  
UAUCGAAGAAUUCACAAAAACAUAAGCCUCAUCAUCCCA  
>P32  
AACACGUAAAAUAAAUGACAGUUUGAACACACAAAACC  
>P33  
UGACAGUUUGAACACACAAAACCCACCCCAUUCUCCCCAC  
>P34  
AGGCUCUUGGUCUGUAUUUAACCUAAAUUCUAUAAGAUUA  
>P35  
GAAUUUAGGUUAAUACAGACCAAGAGCCUCAAAGCCCU  
>P36  
AAUUUCUGCAACAGCUAAGGACUGCAAACCCACUCUGCA  
>P37  
GCCUUACUAGACCAAUGGGACUAAAACCCACAAACACUUA  
>P38  
AUUAGGGUGCUUAGCUGUUAACUAAGUGUUUGGGUUUA  
>P39  
GAAUAGUCAACGGUCGGCGACAUCAGUGGGGUGAGGUAA  
>P40  
CUGAUGUUCGCCGACCGUUGACUAUUCUCUACAAACCACAA  
>P41  
CAAACCACAAAGACAUUGGAACACUAUACCUAUUAUUCGGC  
>P42



GGCUUAGAGCUGUGCCUAGGACUCCAGCUCUUGCGCCGAAU  
>P43  
CUACCCUCCUUGGCAGGGAACUACUCCACCCUGGAGCCU  
>P44  
CCACCCUGGAGCCUCCGUAGACCUAACCAUCUUCUCCUAC  
>P45  
CGACCCAGCCGGAGGAGGAGACCCCAUUCUAUACCAACACC  
>P46  
GAAUAAUCUCCCAUUAUGUAACUUAUCUACUCCGGGAAAAAA  
>P47  
ACUACUCCGGGAAAAAAGAACCAUUUGGAUACAUAGGUUAU  
>P48  
GGCGUCAAAAGUAUUUAGCUGACUCGCCACACUCCACGGAAG  
>P49  
UUUUCACCGUAGGUGGCCUGACUGGCAUUGUAUUAGCAAAC  
>P50  
AUUAGCAAACUCAUCACUAGACAUCGUACUACACGACACGU  
>P51  
AUUCUCAGGCUACACCCUAGACCAAACCUACGCCAAAUAUC  
>P52  
UAUUCAUCGGCGUAAAUCUAACUUUCUCCCACAACACUUU  
>P53  
AAAGUCCUAAUAGUAGAAGAACCCUCCAUAACCUGGAGUG  
>P54  
CCCUCCAUAACCUGGAGUGACUAUAUGGAUGCCCCCACC  
>P55  
CCCUACCACACAUUCGAAGAACCCGUUAUCAUAAAUCUAG  
>P56  
CCCGUAUACAUAAAUCUAGACAAAAAGGAAGGAAUCGAA  
>P57  
ACAAAAAGGAAGGAAUCGAACCCCCAAAGCUGGUUCAA  
>P58  
GGCCAUGGGGUUGGCUUGAAACAGCUUUGGGGGUUCGAU  
>P59  
CCAACCCCAUGGCCUCCAUGACUUUUUCAAAAAGAUUUAG  
>P60  
UAGCCUAUAUUUAACUUUGACAAAGUUAUGAAAUGGUUUU  
>P61  
GGGAAGUAGCGUCUUGUAGACCUACUUGCGCUGCAUGUGC  
>P62  
AACAAAACUAACUAAUACUAACAUCUCAGACGCUCAGGAAA  
>P63  
CAGACGCUCAGGAAUAGAAACCGUCUGAACUAUCCUGCCC  
>P64  
GGGAUGGGAGGGCGAUAAAGGACUAGGAUGAUGGCGGGCAGG  
>P65  
GAAUACACCGACUACGGCGGACUAAUCUUAACUCCUACAU  
>P66

CCUGCGACUCCUUGACGUUGACAAUCGAGUAGUACUCCCGG  
>P67  
UCCCCACAUUAGGCUUAAAAACAGAUGCAAUCCCGGACGU  
>P68  
GUUGGUUCUCUAAUCUUUAACUUAAGGUUAAUGCUAAG  
>P69  
UUAAGUUAAGAUUAAGAGAACCAACACCUCUUACAGUGA  
>P70  
AAAGCCCAUAAAAUAAAAACUAUAACAAACCCUGAGAAC  
>P71  
AACUAUAACAAACCCUGAGAACCAAAUGAACGAAAAUCUG  
>P72  
CGG AUGUGUUUAGGAGUGGGACUUCUAGGGGAUUUAGCGGG  
>P73  
UUUCGGUUGUUUUCUAUUAGACUAUGGUGAGCUCAGGUGAU  
>P74  
UCUAAUAGAAAACAACCGAAACCAAUAAUUCAAGCACUGC  
>P75  
UGUAGGAGGGUAAAAUAGAGACCCAGUAAAAUUGUAAUAAG  
>P76  
UGAAGAGCUUGGUUGCAGAAACUUCGGGGUCUACAAACGCA  
>P77  
CAAGAUACAGGACCACAGGACCGGGGCGAAAUAAAAUUG  
>P78  
AGACAGGGUGGGUCUACUGGACAGGGAGGUAGUAUAGACAG  
>P79  
ACCUGGACAAACACACCUGGACACACACACCUAGACACACA  
>P80  
AUUUGCAAGUUCUCCUGUGACUGAACUCCAAAUGGCACUG  
>P81  
ACAGGCAGAUCCCAGGAGACACGCAGGGGCCCUAAGAAGGG  
>P82  
CGGGGCCUGCUGGUGCUGAACACGGCGCGGCCACUGC  
>P83  
CAGGGGCCCCGGGCUCGGACCCCCACCCGUCCCGGGA  
>P84  
GGAAGACGAGCCCCCAAAGACUCGGACGGAGAGGCCCCG  
>P85  
AGCAGGGGAUCGACGGGAGACCCUGCCACUGCUGACGGAG  
>P86  
CCUGACGUCAGCAGACCGAGACCCAGUCCAGUCCAGGGGG  
>P87  
GGGAGGCAGUAGACACGGGACAGGCUUAUUAUUUUUU  
>P88  
UACACCUGCGCAACGCCAUGACCACUCGCAAGAAGGUGUGU  
>P89  
AGUCUGCCGGCACAAGAAGGACACUUCCUUGGCCCCGUCC  
>P90

GGAGGAAGGAGAAGAUGGGGACAGAGUCCCCAGAGGGCUGA  
>P91  
UGUAGGUGACAAGGGUGGAAACAGAGAGACCUUUAGGUUAA  
>P92  
GGGCCGUGGCCUUUGCCGAGACUGUAGCAGAGAAAACGUAU  
>P93  
CGGGCUGGAGGGUGUGCAGGACGACCUGUUCUGGCUGACCU  
>P94  
UGGCUCUGGGGAGGACGGUGACUGUGAGCAGGAGCUGUGCC  
>P95  
UGGCAACGCCCGGGGCAAGGACUUCUGGCAUUGGCGCUGC  
>P96  
UGUGUGUAUAUGUGGGGGGACAUGUAGAUUUGCGUGUGUG  
>P97  
CCUCACACCUCUCUGGGUGCAGAGCGGCUCCGGGACGGCUC  
>P98  
GCUCCUCCAUUCCUUGAAAACUGAACGAUUAUUAUUUUUA  
>P99  
GGAGAACCAGCAGGGCCAGGACAUUGACGACAACUGGGUGA  
>P100  
GGGAUUGGAUUGGAGCCAGGACCUCACUUCUCCUCUGCCC  
>P101  
GCCCUGUUGGCGGCGUCACUGACGCUUCGCUCCGGUCCUCGG  
>P102  
CCCAGGUUCCAGGAAUCCGAACCCCGGAGUGCUGACGCGGU  
>P103  
UGUGCACAGUUUGUUCUUGGACGAGGACUCGUGAGGAUCGA  
>P104  
AGCAAAAACCAAAUUGUGUGACUGGGCUUUGGAGGAGACUG  
>P105  
GGUCUGUCUCCACCAUCCUGACUGGGCUCCUGAGCUUCAUG  
>P106  
UAUCACGGAUUCCACCCGGACACGUGGAACCCGGCCUGGU  
>P107  
ACACACACACAGAGAGAAAACUGCAGUCAGCCAGCGGAAG  
>P108  
GUGAUCGGAACAGUAUGUUGACUUAUGGGUACAGGAGGGCC  
>P109  
UCUCUUGCCUGCUGCCUGUGACCCUGAAGAACAGAAUUGAU  
>P110  
GAGGGCACAGUGGGCGCUGGACCCGGCCCCCAACUCUCUU  
>P111  
GAGGGUGCAGGCAGCAGGAAACCCACAGCCAGCAGCUCCCG  
>P112  
CGCGUCCGCGCGCGCAGGAUUCUUGCGCUGGAGGCCGCC  
>P113  
CCGACCAAGCCUAGCUGCAGACUCCAAAGGGCUCAGGUUUU  
>P114

GGACAAGCUGUGUCACAGAGACUGAGCAGCUCCAGGCGGAC  
>P115  
GAAGCCUUGAUGUGCUUGAACUCAACAUGUCCUCUGCA  
>P116  
AGAGCUGCGGCCUCAUAGGGACCUUAGCCUCUCAUCUGCUC  
>P117  
GCUCCAGGGGGGCCACGGGACAAAAAGACACCUCAGCCUA  
>P118  
UACAUUUUAAACCCAGAAAGACAUCAUUCUAAUGCCUGGU  
>P119  
CACCUCCAGAUGAUCAAAAGACUGCAUGAAGAAGGUGGUGG  
>P120  
CUACCGCAAGAUCGCCGUAGACAAGAAGGGCGAGGCCAACU  
>P121  
CUGCCCCAUCUUGCUGGAGGACUACCGCAAGAUCGCCGUAG  
>P122  
ACGACGGGCCCAUCUACAUGACUCACCCCACCCAGGCCAUC  
>P123  
UCACCCAGAACGGCCGCCUAACAGACUCCUGGACUGUGUG  
>P124  
CCAUGCCCUGGCUGGCAGAAACCCUCAACAGCAGUCUGGGC  
>P125  
GAAAGUACGUGGAGGACGGGACCGGAAGACGAGAGAGGGCU  
>P126  
UAUUUAUUGCCUGGCCGGUGACUCGGGGGAGGAGGCGACCC  
>P127  
CUUCCCGCCUGCCUACCAGGACCCGGGCUUUAGCUAUGGCA  
>P128  
GCUAUGUAUGAAAACUCAGAACUUGAAUCCCGUCAGCUUAA  
>P129  
AUGGAACUGAGGGACCGGUGACACGUGCUUCAGACCGGUCU  
>P130  
UGGAAAUGUCUGUCGACUGGACCUUGGUGGAUUUGGAAAUG  
>P131  
GGUGAGGCGGGUUGCAGUGACUGGUGGCCGCAAGCCCUUC  
>P132  
CGCCAAGAAAGCCAAGGCGGACAGCCCCGUGAACGGGUAGG  
>P133  
AGACCCCUUGUUGAAAUGGGACAGUUGGCAGCGGCUCUGAU  
>P134  
UUGAAUUUUGUCCCUUUAAAACUGCUGUACCUGUAUGAUAA  
>P135  
UAUACUUUUGUUUAUCUACAACCCAAUAACAGACAUGAGGG  
>P136  
CGCACACACUCCCGGCAGACAGGCACACACACCCCUUGCA  
>P137  
CGAAACUCUGUCUCAAAAAAACAAACAAAUAUUAAAGCCA  
>P138

CCUGAAGCUGGCCAGUUUGACUACGGGAGGAAGUGCUCGG  
>P139  
CCAUCACUUACAAACCUUUAACAUCCUUUUUUUUUUUUUU  
>P140  
CGAUCUUUCACACACUGGUGACCCUGAGAGAGGGAGGA  
>P141  
GAGAGAGGAGGGAGGAGGGAACCUGGCGGGGGUGUCUGAGG  
>P142  
GGUCA AUGUGGACA UCCAGGACAACCACGAGGAGGCCACCC  
>P143  
AACCACAU AUGACCAGAUGUCAAUGAUCUUCUAGGAAAG  
>P144  
AACUCCUGGCUGGACGACAAACCAAGUCUCUGUCUAAAA  
>P145  
CCUUUCCAGCCGGGCGUCAGACUCCCAGACUCUGGCCCCGG  
>P146  
CAAGAUCUACAUCGUGAUGAACUAUGUGGAGCACGACCUCA  
>P147  
UUAUAUUUCCUUUAUACCAAACAAAACUAUGGAGAACUAAA  
>P148  
GAGUCCAAU UCCUGUAUAACAGCAUUA AAAUAAUCUGCC  
>P149  
UCCUCAAAAACUAAUAGAAGACUGGGUGUGGUGGCUCACGC  
>P150  
GGCUUUUAACCCACAAGUAACCUUUUAUUUUUUUGAGAC  
>P151  
GAAGACCAGCAGAAACUCAAAACUGGGGAUUCAGGUAUCAG  
>P152  
UCAAAUGGGUGAUGAAAAGGACUCUUGGAAAGUGAAAACUU  
>P153  
GGGUGUCUUUUUUUGAGUAACUGCUCUCUGAGUUUUGCAC  
>P154  
GCAAAGAGAAUACAAAUGAAACCCCUUCUUCUCUUCCGU  
>P155  
CUAUACAAAACUGUGCUGUGACCUUGCGGUAGGCCUGGAUC  
>P156  
UGGAAAGCAGGUUCUGUGGACCCCCGCCCCGCCCCCGC  
>P157  
GCUCAUGACUUACUCCAUGACAACAUCAUCUGCGGGAUCA  
>P158  
AGAUAUUGGAACUGCCAGAGACUUUAAAUGACUGUGAUGGA  
>P159  
UGGUUUGGCUGAGGAUGGAGACUAAGGAAAUGGGAAGAAU  
>P160  
GAGUGACCAGACUUUGGGAGACUCUCAGCACUAGUGUCGCA  
>P161  
GCCUUUCCUGGGGAGGAGACUCAGAGAUUUGUCAGAGGU  
>P162

CCAGGUUGACGAUUGAUAAAGACCUGGUGACCGAAGGGAAGG  
>P163  
AGAAGAGGAAAGGGGUCUGGACCAGGUUGACGAUUGAUAAAG  
>P164  
UGGAUGCACGGACGACGUAGACACACGGAUGACUCAUCCAC  
>P165  
CUCAAAGCCUUCGAACUCUGACUGGUCGAUCCUCUUUAUGG  
>P166  
UUUGUUUAAGCUAUUUAAAACCAGUAAGGAGACUUGAAAU  
>P167  
CAUUUAAACGUAUUUUAGAACUGCACUUUGUCCACAACCU  
>P168  
AAGUGGGGCUCAGACACAAGACCAAUUGAGGACUAGAUAA  
>P169  
UCAAACGUUUGAAGGGACCAACGGCCAACAUCACCCGGGA  
>P170  
CCGGCCACACUGGGCCUCUCAUCUACUCUUAGCGGGGAUCU  
>P171  
GCAUGUGGUUUUAAAAUAGACAGUAUUUUUAAAAUCAAA  
>P172  
UUUUCAGGAUGGGACUUCAGACCAAGGACACAAGUUGGGCU  
>P173  
UGAGCAAGAGCUCCAGCAGGACGUACGCCAAGCGCUGACGC  
>P174  
GUGACUCUCGCUUAGCAAAGACUAGAGAUGGCCUGUCCGUG  
>P175  
GUGAUACAUGGAAGGAAAUUACCAUGGGUAAGAAGCCCAGU  
>P176  
UAAAAAGAGGUAGACGCGAAACUGCAGUUACGGUGACCAAU  
>P177  
UGC UUAGCAGCCAAUACUUGACUUCUUUUGGAAGCAGUCUU  
>P178  
AGUCUGGGCAACAGGGCGAGACUCCAUCUAAAAACAACA  
>P179  
UGUUGUGAGGACUGAGAAGACAAUGUCAAAUGUUUUUAAU  
>P180  
CUACAAAUCCAAGCAGAUUGACUCUAAAAUAAUCUUAAA  
>P181  
UGUCCCUCAUGUCAUUCAAACUGUUUCCAAAGGGAUUUG  
>P182  
GGACUCGCGGGAGAGAUGGACUCUGUCCUCAGCAACACUC  
>P183  
CCAAGGAGGACUCCUCAUAAACAUUGACAAAUUGCUCUGCC  
>P184  
GGCCCUUGUCCUCAUAAAAACUCUCAGUACAGCUUAAACU  
>P185  
GCUGUAACCUGAGAGGAAGUAUCAGGUAACGCAGGUGUCGG  
>P186

CGUUUUUAAUAAGGGAAGAAACUUUCCUACCAGAAAGCUUU  
>P187  
CCACAGUAAAUAUAUGCCAGACCUUACCCCGCAGUAUGUAG  
>P188  
GAUCUUUGGCCUCUUGUUGGACUUUUUCUACACUGGUCACC  
>P189  
UUGCUGGACUGGCCUGAGAACUGGGAGGGGAUGGCUUCAU  
>P190  
GGACGUGGUAGAGGCCUAUGACCCAGAGACUCGCGCGUGGA  
>P191  
UUAGGUGCCUAAGCAAAAGGACAGGCUGUCCAAGGUAGAAA  
>P192  
GCAUCGUCCGAGACACUAAAACCCAGCCACUUCACUGUGGCC  
>P193  
GGUAUCCAGUCAGCCAUGAACACUAGCAUCGUCCGAGACA  
>P194  
CAGUGC UUAGUGACCCCAAACCCAGGGCCAUCUAUGAUUA  
>P195  
ACACUCUUUAUAUACCGCACAGUAGCUGGGUUCUCGAAGA  
>P196  
CAAGAGCUGUUGAGUCCUAUACAUUCACACGAGAGCUUUA  
>P197  
UCCAAGUUAGAAGAUGAGAGAAUAAGGCACGCGCAUGAUUC  
>P198  
AAUGGUUAAGAAUCACAAGGACUCCCUCUCCACCUCCAUU  
>P199  
UCAGAAACGUGCCAAAUGGAACUCAAGGUGCCCUUCAGAA  
>P200  
GUGCGUGCUGGCGUGCGUUCAUUUUCAGCCUGGUGUGGGGU  
>P201  
CUGUGUUCGCUCUAAACAAAACAGUGGUAGGUUAAUGUGUU  
>P202  
UUUUUAGACUGUAUUAAUAAACAUACAACACAAGCUGGCCU  
>P203  
CCCAAAGUACCGCCAAGAGAACCUUUGUCACCGAGUAACUC  
>P204  
AGAGUCCCAUACCUCCUAGACCAGUAAAGCCAGAUUAUAG  
>P205  
UUCUCCUAACUCCGAUGAAGCAAACCUGAGGUUCCCCCA  
>P206  
UCCACUGACACCCAUAAAAAACUCCCCUCCCUUUUCCCU  
>P207  
UAGAUGGCAUUAGGAGGCUGACACACAGUAAUACUAGUAG  
>P208  
CUAGCAAGUAGGAAGUUCGGACAGUUUCAUAACAUGGCCCA  
>P209  
CUGUGGGCUUGGGGUUAUGAACAAUGUAAGUAGAAGCAGAG  
>P210

CCCCUUCUACAUGCCCCUUAACCCACGGACCCCUGCUGG  
>P211  
GGAGGUGCCGCUGUUCCACAGACGCUCGCGAGCAACCCUC  
>P212  
UUGGAUUAAGCAGAUGGAAAACUUGAAUGUUGCAGCAAGUA  
>P213  
CAGCUCGAGGCCCCCGACCAACACUUGCAGGGGUCCCUGCU  
>P214  
ACGAUGAGCAGGAUCCCUGACUUUUUUUAACCCCUAGA  
>P215  
GUUUA AUGGCGUACGUGGGGACUUAGCCGGAGCAGGAUGAU  
>P216  
CACGAACAUGUUACCAUUUGACCGUUGUUUA AUGGCGUACG  
>P217  
UGAGGCCCUAGAGCUCGGGACAAUGAU AAGACUCGCUAUA  
>P218  
CCAUGCCAGGGAGAUCUUUGACUCUCGCGGGAAUCCACUG  
>P219  
AUUGGUGGAUAGAUGCAGAAACAAGGAAGAAUUGGAGUCUG  
>P220  
CAAAGUCGGUUUCUCUCUGGACUGUUUACACUUCAAGGCGG  
>P221  
CGGGGACUCAAGGGCAAAAAACUGUAUCCUGUAGUGAGUGC  
>P222  
UGGCUUUAUACUUCUGAAGACACAAUAGCUAAGACCCAAA  
>P223  
ACACAAUAGCUAAGACCCAAAUUGGGAUUAGAUACCCACU  
>P224  
AGGCGUAGUCACAUCUUUGUACUGUACUCCCCUGUCUCACC  
>P225  
ACCCAGCCAGUUGGUAUUGACCUUGGAGGGAGAAGACCUC  
>P226  
UUAACUCUCCGUUCCGGGAAACUCGCGGAUAAGAAGGUGAU  
>P227  
ACCAUCUCGGUGUGGAUGAGACAUGGGCCAUCGGCAGGAA  
>P228  
AAGAACAUCAUAUAAGCUGACCGUCACUGCCUAUGACUGU  
>P229  
GAACUUGUUGCGACAGAGGGACUCACUGGACUCUGUUCGUU  
>P230  
CAAAAUGAAAUGUAUGAUUAUACAGUCCGUGAAAAGGCU  
>P231  
AAUGAGGACCCCAAUGCCAAACUGGUUCGUGAAUUAAGGA  
>P232  
GAGCAACCCUAAACACAGAAACUCUUGGAGUCCUGGGACAC  
>P233  
AGUUUAUCCACACCAACUGGACAGGCCAUGGUGGCACCGUG  
>P234



GCGCACUCUGAUCAACUGGAACCUCUGUAUCAUGCGGCUGA  
>P235  
AGUUUCCUCUCUACAAAGUUACACUGCAGCAGCUGUCUACC  
>P236  
UUAGCCCCACCAGCUUCAGGACUUCUGCCAAUUUUGAAUGA  
>P237  
CAUUUGACUACCUAUGUACUACUCUACCCCCUGCCUUAGAG  
>P238  
AGAGAGGUUUUGAGACAAAAAAAUAACAGAACGUGAAACCC  
>P239  
GCUUCGGAGGAAAGCCAAGGAGCCGGACCAGAGAGAAAACU  
>P240  
GAGGAGGCGGCCCUAGCGCCAUUUUGUGGGAGCGAAGCGGU  
>P241  
CACAGAGAUAGUCCUGGAAGACACGUGGCGCCUGUGGACCG  
>P242  
UGUUUGCCUGGAGGGAUAAAACAGCUCGCAGGGAAGAUGAA  
>P243  
UUAAGGAUCGAAGUAAAGUGACUGAGCUGGAAGACAAGUUU  
>P244  
AAGACGACAUGAGCCUACCGAAAAGUAGGAGGUGCGAAGG  
>P245  
ACUGAUGCCCAAACUGUCAGACUUUGGGGGAUCCCCGCCUA  
>P246  
CCCGGCUGAUACCACUAAAAACCAUGACGUCGGACAUUUUA  
>P247  
GCAGGAUGUCCACAUGCAUGACCCCCGGCUGAUACCACUAA  
>P248  
GAAACGAGUGUGAGUCUGAAACCAAUUUUUUGAGGCCUUGC  
>P249  
CUUCAAGUUUUUGGGUAAAGACACCUGGAUCAGACUCCAAG  
>P250  
ACUUUCAGCGACAGCUAUGGACAGCAUGGUACCAAGGAGUU  
>P251  
UGGGGGAGAUGAGAGAGAUGACUACAGCAGGCAGCAUCCUC  
>P252  
AGUCUUGUUAGACUUUAAAUAAAAUCCGUGGGGGAGGGGC  
>P253  
GCAGAUGCUCUUAUGUAUAUAUUAAUUCCAGCCCUUUGUA  
>P254  
UGACGGGACCACUACUAAAAACCUAAAAUAUCUGUGAAUG  
>P255  
CAAUUUCAUAUUGGUUAAAGACUUAGGUCAGGGCAUACAGA  
>P256  
CACCAUCCAUCUAAGGACGACAAAAGAACCAGGAGGGCGG  
>P257  
UGCCUUUGUGGAUUUUGUGGACAUCAAAGUGCACAGAAAG  
>P258

AAGUGAACUAUUGGCGAGCAACUGUGCCUCCUCAUUCGUU  
>P259  
AAAAGACAGAUAAAGAACGAACUUUUGAUCCGGAGAGAGUG  
>P260  
CUCGUUCACGAGGUAGGCAAACCCCUCAAGAUGUCACUGA  
>P261  
AUUUGAUGUGAGUUUCCCAAACAGCAUAAUUAAGAGAGUA  
>P262  
AGGGAGUGAACAGAAACGUGACAGAAAAGAUGCUGGCACAG  
>P263  
AAGUGAUCCAGUUGAUCCAGACAAGGAACCAGAGAAAGAAG  
>P264  
CAUCGGCUCCAUCAUCA AUGACAUUUCUGGGGAGCCAGAAA  
>P265  
AGACUCUUAACGCAGGAAGGACUUCAAACUUCUGCUGAGAC  
>P266  
GGACCCACACAUAUGAGGACCCAACCAGGCUGUGUUGA  
>P267  
CUGUACUCCAGCCUGGGGUGACAGAGGAGAUGCUGUCUGA  
>P268  
GCGCCUGUUCACCAAGAUUGACACCAUUGCGCCCGAUGAGA  
>P269  
UUCUGCUGGGCAAACAGUUUUAUACCGCCCGUCGUGGCGA  
>P270  
AGACUUCUCCAUCGCAAUGACCUGUAUUAACACAAGCCC  
>P271  
GAAUUCUGAAAGCACCUCUGACAUUCCUUUUAUUAACUCAC  
>P272  
AUAAUUUGUGGUAGUGGGGACUGCGUUCGCGCUUCCCCU  
>P273  
GAUUUCCCCAAUUGUGGGAAACUCGACUGCAUAAUUUGUGG  
>P274  
AUUGCACUCCGGAUGUGCUGACCCUGCGAUUCCCCAAU  
>P275  
AUAAGCCUCGCCUGGGAAAACACCUUCGUGAUC AUGGUA  
>P276  
CUGUGGCUCUUGUGCAAUGACAUC AAUGGAGGCAACACUC  
>P277  
GGGUGGGGCAGAGGUGGGAACAUUUGUAUCAGUUGAGUCA  
>P278  
CACAUUCACUCUGCACCCCGAUGUGCCCGAUGCAGACCUCA  
>P279  
UAUGACUGACGGAACAAGUGAUGGCGUGACACCCUUAAGGU  
>P280  
GCUGGGCUAUUUAAAUGAGAACUUUGAAGCUCCCCAGAAGC  
>P281  
CUGCUGGAAGCCCUGCGGGAACACCCUGACGUAAACAAGAA  
>P282

CAAUAAAUCAUUAGUUUGGACCUUCCUGUGGCUGAAGUUU  
>P283  
CCAGCUGACCUCAGUUUUUAACCCUAGAACUGUAGCAUCAC  
>P284  
AUCGGGCCUGGCGAUAAAGAACAAGACUGUGCCUAAAAGU  
>P285  
GGUGUUUUGCAGAGAGGAGAACUUAUCCCGUAUUCUCCAG  
>P286  
GGGAGGUUUUAUCCUUGGUGACUCUAAUGGUAGAUUUUUGU  
>P287  
GGAGACAGAGGUUGCGGUGAACCGAGAUCGUGCCACUGUAC  
>P288  
CUCUCCACAUUCCAUAAGAGACCGUGUGGUUUUUGUUCACC  
>P289  
GCUAACCAGACACGCCGUGCACUCGUUAGAUUCCUUUCUUA  
>P290  
ACUGUGAGUGACUGCUCUCCCCACACAUAGCCAACAUCGGGCG  
>P291  
ACCGUGGUCGCCGUCUGUGAACAAAGAUUCCUAAAAUAAUU  
>P292  
AUCUCAAGCACAGACAGGAGACAGUGGACUACAUGAUAAAG  
>P293  
GAUCGAGACUAUCCUGGCUAACACGGUAAAACCCUGUCUCU  
>P294  
CCUUUCUCUCCAACUGUAAACACAGAGACAGCUUUGGGAA  
>P295  
UUUCUCCA AUUUUAUCUAAACAGUUGCAGAGAUUUUUUAUA  
>P296  
UCUGUCUCCACUGUAGAAGACAAGAGAAUGAAACUCCACC  
>P297  
UCUCCGCCCCCGCCGCCAUUACGGAGCUCUCCAGUGGUG  
>P298  
GGGUUUUCAUCCUGAAAGAGACCCUCUGACCUAAAAAAG  
>P299  
AGAUGCAAAGAGAUUCAGAACAAAUAAGAGGUAGAAGCAG  
>P300  
GGUCGGGUCAGGACCCUCAAACACCAUCUGGGAACACCAAG  
>P301  
UUGGGGAAACUAUUUUUUAACACUGUGGAAUACACUGGAA  
>P302  
AGAGGUGCUGGGCUGCACGGAACCCAGGUGGAGAAGCGGCUG  
>P303  
GCCUGCUACGAGGGCACGGAACUGGUCGGGCUGCACGCUAC  
>P304  
UGAACUUUUCGGGAACUGGAACUGUUUAACUUGAACCCAGG  
>P305  
CAGAGGGGAAGAGGAGUUUGACAUGUUAGGGCAUUAAGCA  
>P306

UAAUCUUUGAAUACUUGCUGACUGCUAAGAAAUGACCAGAG  
>P307  
ACAGUCUGUUUUAAAGGGAUAACUAUGGGUGCUGAGAAUAGG  
>P308  
AUCCUGCCAGUGGCCCCCAGACUGUGGGGUUGGGACGCCUG  
>P309  
UUCUUCACAUGGGGCAACCAAGGCUAAGGGAGGACAGCAAC  
>P310  
UGACGUUUUGCUGCUCAGAACCCACCGAUCUCCAAGUUCU  
>P311  
ACUUGGGAGGAAAUAGGAAAACCUUCGGUAUUUAAUGGUGA  
>P312  
GCCGCUUCAGCAAGGUGGUGACUAUUCUGGUAACUAUGGUU  
>P313  
AGCUGCAUGAAGGAGGUAAGACUUGUGCUAAUUUUUUUAAG  
>P314  
CGAUCUGGGUAUCAAAUAUGACCCAAGCAUUGGUAUCUACG  
>P315  
AGGGUUCUAACAACCUAAAGACUCCAGAAGGGAAAGUCAA  
>P316  
GUCCCAUACUCUGUUCUUGAACCCGUUUUGGAGAGGUGUAC  
>P317  
UUUAAUUAAAGGAACUGAGUACAUUACCCUGAUGUCUAAA  
>P318  
AUCUAGAAAUGUUAGUAAGAACCAACAACAGCUAACAGAC  
>P319  
ACCCCAAAAUAAGUAUUUAACUUUGCAUUAGGUAUAAAGG  
>P320  
AAAUGAAGUAAUACCCUUAACCAUUUAUAAUUCUAGUAU  
>P321  
GAAGAUUUGGAACAUAGAAAACACAAAAACUCACCUUAAAA  
>P322  
CCCCAAAUUUUUAUUGCAAACUCCAAAACACCAAUACCAU  
>P323  
CCAGGGAACUGAAACAGCAGACAGGUUAUGAACCCCAAAA  
>P324  
UAGUGAGUGGUGAGAGGAAAACUACUAGAGUGAGGUAGGAA  
>P325  
UACUGGCAACCUUCGUAGUAACAGCUUUGGUGGAGUAGUGG  
>P326  
UGGCCAGAAAAUGGUUAUGACAGAGCAGGUAAUUGGAAUG  
>P327  
UGCAGAACUUGGCUCCCGGACCCACCCACCAUUUAUAACU  
>P328  
GGACCCACCCACCAUUUAUAACUUUCAACAGUGAAGUCAA  
>P329  
AGAAAUGUAUUUUUCAUGAACAUUUUGAUACAAAUUUCAU  
>P330

CAUGGUCACUGGGGCCUUGGACAAGUUGUUACUGACUAUGU  
>P331  
UGAUUUGCUCUUUACCCAGGACUCUGAAGGUAAUCAAGUUA  
>P332  
GAGCUCCUUUUAAGAUGUAACCAAUAACUGGAAUUGGGAC  
>P333  
CAUUGAUCUGGAAGGGUAAGACAACUCUUAGUGGGUGGGGG  
>P334  
CUUAAGGACCACCAUGUCAGACAGAU AUGCCCAGGACAUGG  
>P335  
CCAGUGGAUGAACACACCAAACCCCAAAAAAAAAAAAAAAAAA  
>P336  
GGGCUCCAGCGCUAUAAAAACUUUAUAACCCCCGGAGC  
>P337  
GAAAGCGAUUCACUGUAUAAACUUUUUUUAUGAAAAAAU  
>P338  
GAAGAACUUCUAGGUCCUAAACUAGAAGAGGAAGAAGA  
>P339  
AACGGAAGCAGGCACCACUAACUUAUGAAAAGGAGGAGGAA  
>P340  
CUCGGUAUCACCGUUGAUGAACUCAUUGGUUUCACAAGUCA  
>P341  
ACAAAAAAGGUGACUGCUGAACUGUGUGUGGUUUAUUGUUG  
>P342  
GGCGGUCCUUUCUGUGUGAACUUCGGCUGAAAGGGAAGG  
>P343  
GAGGACGACUGGUCCGAUUAACUCUUUCUGCCUGCUGCCA  
>P344  
GGGACUACAGGCGCCACAAACACCCCAGAUAAUUUUUUG  
>P345  
AACCCUGAAGCUGUAAAUGAACCCAAGAAGAAGAAUAUGC  
>P346  
AUGCAGAAUAACUGGAUCUAACUGGGUACCUGAGAUUUUU  
>P347  
CUGAGUUUUUUUCGCCUUUAACCUAAGUCCUCAGGACUAAA  
>P348  
GACCUUAGGACCCUAGGCUGACCUGGAGAGAUUUUUUAAAA  
>P349  
ACGUUUCUCCCCUUUCCCUACCUUCCAUGGUCCUGGUUGG  
>P350  
GUGCCCCUUUCCUGUCCCUAACAGUCCACAGGCAAACAAU  
>P351  
GUCGUAAAAGGAGGAAAAGUAUAGUGAAGCUGGCCUAAA  
>P352  
ACAGUGAUGAAAUGCAGGGGACCUGGUAGGUUUUUUGGA  
>P353  
UCAAGAGAUUUCGGAAGCAUAUUUUUUUGGUUUUGGGCAG  
>P354

GGAAGGAAGUAGAGGAAUGAACUAUUAUAGGUUCCUGCUA  
>P355  
AGCAUAACAUGGAUAUUGGAACUUGGGUAACAAGGGUCCC  
>P356  
GUUUUUUUUUAACAUGAUACAACGGCCGGGCUUGGUGGC  
>P357  
UGGCCUCGCCUCGCAGAGGGAGGCGGGAGGGCGCGGCCA  
>P358  
CAUGAACAAAGACCCCAAGACCUAGAGAGAAGAGGAAGUC  
>P359  
GCUUUUGGAAGAUUUUCGAAACAACCGGUACCCCAAUUUAC  
>P360  
UCUUUCAGCCCCACCUGAAACAUCACCCUCAAGAACCAGC  
>P361  
UUUCCUGUCCCUCUAGAAGAACAUCUCCCUUGCUUGAUGC  
>P362  
AGAGUGAGAGAAGUAUGUGGACAUCUCUUCUUUCCUGUCC  
>P363  
CAAGCAUAUUUCUUUAAUGACUCCAGUAAAAUUAAGCAUC  
>P364  
UUUGGUAUAUUGGGAGGUGACAUAUUGUCCCUUAUCUCAG  
>P365  
CCAGCAAUACCCAGGAGAUGACAUAUAAAAGGUGUUGAUUUU  
>P366  
GCUCACCUUUGGGUUUUGUGACAAGAAGGGGACGUGUUGGG  
>P367  
GGAAGACAUACUGAGCACAUACUGUGUGGACAAUAACCAGG  
>P368  
GUAGUCAUUGGAGAGAAGGAACCCUCCAAGGGGAUCCAAA  
>P369  
UCGAAACCUUUUCCGGUCUUCUCACGUUGCGGCCUUCUC  
>P370  
UUCAAAGGCCAAAUGGAAGAACCUUGGAGGAAAAGGGACACA  
>P371  
GGCAGGGAAGUAGAGUUGAAACCAACCCAGGGACACAUAGG  
>P372  
GGUUGCCCCAAUACUCAUGGACACCAGAACGGCAGGGAAGU  
>P373  
UGGCUGUGGAUGUGGGUGAGACUGGACCCUCACCCCUAUU  
>P374  
AAAAGAAUCUUAUAAAAGUAACUGUUGCACCAUUUAUCCA  
>P375  
AUAAGAGCUCUUUCCAUGGACACUCAGCGCUGCCGGAACU  
>P376  
AUAGAGGGAUCCACAAAAGACAAGGUCAGAGGGGGGCUGU  
>P377  
CUGGUGGCAAAUAGGGUUGACUGGAAGCUUAGACAAUGGU  
>P378

CUUUAAAAAAAAAAAAUUGGGACCAGGCACGGUGGCUCAUGC  
>P379  
CUUUUUUCCACCCUGGAGAAUUAUAGGGGUGAAAGACUAA  
>P380  
ACAGAUAAUGCCCACAGGAGAUGCUCUGGGAGGACAGAAGC  
>P381  
UAAAUGUGUCUAUACUCUAAACCUGGGGGAAGGUGGUGUGG  
>P382  
CUUUUAGCACCUUGACAUGGACCGUAUAGCAUGUGAUAAUU  
>P383  
UUUCCUUUAGUUGCAUUGUAACUGAAGAUACAUGGAACAC  
>P384  
UCCUAAAAGUCGAUCUGAAACUUGGGGUGGGAAAGGGGAG  
>P385  
GUGUCCUGUGUGAUGAAAGGAGCCUUUUUACACACCCCCU  
>P386  
GAUAACAUUUCCUUCCCCAAACAGGGCUCCUAACAUCAUGU  
>P387  
GAAUUUAGUGUGCUUUCAGAACUGAAGGGAGGCCAAUUGUG  
>P388  
GUUAAUCAUCUAACCAUCACAUAUACCCCCCGCAGCUAG  
>P389  
CUUUGAGAAGAAGAUGGCUGACUCCACAAGGAGGAGAUGG  
>P390  
GAAAGCGAUCCAAAACCCAGACUCCCCAGCAACGCUCUGUG  
>P391  
AUGCIAAAAAUCAAGCAAGAACAGUUUAUGAAGAAGAUUGU  
>P392  
GUCCAGGAGUAAACUCGUCAUUUCUCCAGCUAGAGGAGC  
>P393  
UGUUUCAGAAUAUCCAAGGGACUGAGUGAAAAGAUUUUUGC  
>P394  
UCCCCGAACAGCAAUCAAACCAGAAUUUAGUUAAUUUU  
>P395  
UUUAGUUAAUUUUAGGCAGGACUGCUAAAACCAAACUCAA  
>P396  
CAACAGGGUCAUUGGCAAGUACUAUGAGACGGCCUGCAGG  
>P397  
AAUGAUGCUCUUGGGUUUCAGGUGGAGCCGCCGAGGUGG  
>P398  
GACACAUAGUCUGCAGCAAGACAUUCCUAUAUUGAAGAAU  
>P399  
ACGACAAUUAUGGUAAAAACAUAUUGCUUGGUCUAAAGAA  
>P400  
UUAACAUAGAUCGAUGGUUGACAAUCCAGAGUGGUGAACAG  
>P401  
GAAAAGCUACCUCAUCCGAGACCAAAGAAUCAACAGACAUU  
>P402

AGGGGGAAAGCUCGUCAGGAACAGCUGGAACUGACACUAGG  
>P403  
GAUGCCAGGAAGCGGGCAAAACAAGUAAGUUGGGGAAGAAA  
>P404  
AGGACCAGGAUGGGAAGAUAAACACGUCAGGAGUUUAUCGAU  
>P405  
UUCGGUAUCAUUUAAAAGUGACUAUGCUCGGGCAGGGCGCG  
>P406  
CCCAGAAUAUCCACUCCUGACACCAGUUGUUUAGGAAAAA  
>P407  
UGAGAUGUCCAGGAUCUGUGACUGAAGACAUUUCUGAUUUAU  
>P408  
GCCUCCAAAACCAAAAUAAAACUGGGUCACUUUACAGUCUU  
>P409  
GGACCAGCUUCAGCUUUCGGACUCUGGUUCUUGGAUCGUGU  
>P410  
GUGGGGGAGGCAAACAACAAACAUGAAACAAAACGAGACGU  
>P411  
AGCCUGUGGAGGUUCAAAACACUUGACUCACCACGGGAUGA  
>P412  
UUUAAGUGUGCCACAUGGACUUACCGAGCAUGGAGAGAG  
>P413  
AAAUCCAGGAAGCCCAAAGAACACCAAUAAGAUGAACCCG  
>P414  
ACUAAAGUUUAUGAGAUCAGGACUUUUACUUUGAUUUGACAG  
>P415  
GCUCACCCAAAAGAAAUGACUUUAAGUGAAAUUUAUCAG  
>P416  
AAAUGAGUUGGUGGAGAAGAACUGGACAU AUGGCUGGGAAU  
>P417  
UCGAGGAGUUCUACAACCAGACAUGGGUCCACCGCUAUGGG  
>P418  
AGGUGUUUCCAGAAACAGAACAGGGUUGGGGUGAGCAGGG  
>P419  
AUGGCCAGCCUCCAUUUGACAAAUGGGGAAAUUGAGUCC  
>P420  
AUACAGUGAUGCAUUUGAGGACAGGCCUAUUCAGGAAGCU  
>P421  
UACGGGCGCGGAUGUACGGGACAUUCUAGAACUCGGGGGUC  
>P422  
AGUAGAGAGCAAGAGUAAAGACAUAAAUGGACCCAGAUCUU  
>P423  
AAAGAUUCCGUGGAGAGAAACCGUUUUGAGUUUCAAGCAA  
>P424  
CUCCUGUGAAUAUACUUUAAACACCCUGAGAU AUGCAGACA  
>P425  
CAUCUCUCGGGACAACUGGCACAAGCGCCGAAAACCGGGG  
>P426



UCCUACAGGGGGUGGAGAGACCAGCCUUUCUCCUUUGGU  
>P427  
AAUUGGGCACCCUGCCCCCAACUUCAAGCCACAGCUGUUA  
>P428  
AGAUCAGCUCUCUCGUCUGACCAAGUUGACCCGCCGAACC  
>P429  
GGAAAGGGUACAAUGAGGAAACUUUAAAAUAAGGUAUAUUA  
>P430  
CCCAUCUAGGUGGCCACAAACUCUUUAACAACUUGAAUA  
>P431  
GGUGGCUGUAAAGGACUUAACUAUAUUGAAAAGGCAGUAC  
>P432  
UGCAUAACUGUGAUAAAAGGACAUUACAAAACGAUUUACAG  
>P433  
AGGGAGUGGACUACUUUAAACAGCACUGGUGACCUAAUGA  
>P434  
CCCAAGAGAAAAGACUGUUAACUGGAAGAAAAAUUAUAU  
>P435  
GAUUGCACAAGUACUUGGAACCUUUGUACAAUGACUAUCG  
>P436  
AGUCCUCCUCCAGUUGGAAUAUGAAUCAUCUACAGCCU  
>P437  
GACAGAUAGACGGACUCCAGACCGCCAGCUGAGACCUUAG  
>P438  
CGCGCGCCGCCGAAACGUCAGUGUCGGGCGCAGACGGCGG  
>P439  
AAGGUGUACCAGAUACGAUGACUAAGCCAGGGCCCCUGGAU  
>P440  
UAGAACUCAUAGCUGUGUGACUCUGGGUGAGUCCCUAAC  
>P441  
AAUUUGACCUAAAUGACGAGACCCUGGAGUAUGAAUGCUUU  
>P442  
UUAAGAUUUUACUUGUCGGACAAACAUGCCCACGUUAU  
>P443  
AUUAUUUGUUUUUCUCCUGAAUCAUAUUCCUCAGUAAC  
>P444  
UAUUUGCAGGGUAUCUAAAAACAUGAGGACAGGUUUAACCA  
>P445  
UGGGGAAGUCCCAAUUAAGACAGUAGUGUUUGACCUGGGU  
>P446  
GGUCCAGGUGGAGGAAUAACAUGUGUGGGCUCCUUUC  
>P447  
GGAGAGGAAGCGCAUGAGGAACCGCAUCGCUGCCUCCAAGU  
>P448  
GCUUCCAUAUAUAAGUGAGGACAUGCGAAAUUUGUCUUUCU  
>P449  
CGCCGUUAGGGAGAGGGGGCAGCGCAGGAAACCCGUUAUU  
>P450

CAGGGUGCCAGGAAAUAAGACCUGAAAAGAAAUAAGAGUGGAG  
>P451  
CAUACCAUUCACACCUAAAAGACUGAAUUUAUCUGUUUUA  
>P452  
UCUCCCAACCAGCCCACAAAACACGGGGACAAUCGAGAGCA  
>P453  
UGUGCCUGUUGUAGGAUAAGACCAUCAACAGAAAAUUUACA  
>P454  
GAGAAAAAGAAGAGAAGAAACCAAUAGAAACAGGUUCCCC  
>P455  
UAGAAACAGGUUCCCCUAAAACAAAGGAAUGUUCUGUGGAA  
>P456  
UUUGUGUGGCUUGUAGUUGGACCUUACACUGUUAUGGAAU  
>P457  
CGCCAGUGGAGGUCGCCAAAAGCGGGCGAGGGCCUCCGUCU  
>P458  
UCCGGAUGGGUUGGUAGCAGACAGGGUGGAGUAGGGUUAAG  
>P459  
UUGUGAAAUUUGACUUGAGGACUAGAAUUAAGAGUGGCGAG  
>P460  
GUCAUUUCUUUCUCUUGGCCAAGAAUCGACGGAAGGGAAAA  
>P461  
CUUCCUUCUUCUUCUUAUUUGACCCCAGUUUACAUCAUUAA  
>P462  
UGGAGUAAAUGGAUAUGUAAACUGACAAAAUAUAGUGUGGA  
>P463  
GGUUAGCUUCCUCAUAAGGC AUCGUUUCGGUGGGUGGGUC  
>P464  
AGUGCCGCCUUGUGAAAGAAACCCGGAUUUGUGAGGUGCGG  
>P465  
GUCUCUCCUAUUUUUGUAUUACCCAGCUUUCUUUUUAAUAC  
>P466  
AGAUUGAAGGCCUACAAAAACAAUUGGAUAUAGAACUUA  
>P467  
UGAUUGGAGCGCUCUGAUGGACAAAAAGUAAAGCCACCAU  
>P468  
GUUUAUAUGGUUUCAGCCAGACCCUGAAGUUGAAGGAUGCA  
>P469  
ACAAAAGCUUCUGUUAAAAGACCCUACACAAAUGCACAAU  
>P470  
UGAAUGAUGAUUCCACUAACUGAGCAGUCAGUAGUUGGU  
>P471  
UUUUUCAUCUGAGCUGGAAGACUAUGGGCUUGUUGAGUGCC  
>P472  
GAACCCUGGCAUGAAUGAAAACUAAAUAUAGAAGCUCGUU  
>P473  
UUUUACUCUGGGGGUGGAGGACUGGAAAGACAAUAAGAAAG  
>P474

AGCACUAAUCUAAACACCAGACUAAUUUUUGACUGAGUAGC  
>P475  
ACCUGUGCACAGGAUUGUUAACAUCGCAUAAUUGGCACUUA  
>P476  
CAAGUUUGGCAUGUUUGAAAACCCCAAAGGAACUGGAAUG  
>P477  
AAAGUGGAAAAAAUAAAUUGACAAAUGGGGAGCUGAAAUA  
>P478  
UUAGAGCAAUGCCGCAGGAACCUUUCUACAGGUCUCAGG  
>P479  
AGGCAGAAGAUUAAAUAACCAAAAAAGUGGUUGGUUGAUA  
>P480  
GAAUUGGCCAAAAUAAUUGAACAGGUAGUACAGCACAAAAG  
>P481  
AUGAGAAUGCAAAGUAAGAAACAAUAUGGGGAAAAUUAUA  
>P482  
GUUGGAGGUAAGUGUUGGGACACAAGUGUUAGAAACAGAA  
>P483  
ACUUUUACUUCUCUCCAAAACUUUAUCCUCCAACUACAA  
>P484  
AAUUGAAGGGGGAUAAAGGAACUUACUUUGUGGUGGAAAA  
>P485  
CAAACUCAAACUUUAUCAGGACCCGGACCUCUCAGGCUAAU  
>P486  
CUAGGUAUAGAUGCUUGAGGACUUUAUCCUGCGUUGUGUUCU  
>P487  
UGGUAGUAUGGGUAUGGUAGAAAUGAUUAGGGCUUGGGGG  
>P488  
ACUUGAAGAGGUUAUCAAGGACAUUUAAGGAAUCCUGAUCC  
>P489  
AGAACUUCAAUAUGUAGCUUACUCUUUUUUUCCCCCUUCU  
>P490  
UCAGUUUAUAGGGAGUUUUGUACAUGGUGCCUCUUGUUUCC  
>P491  
AGUUUUACAGAAGUAAUAUGACUUUUGAUUGCACAUACCA  
>P492  
ACGCUCCCGUGGUGGUGAGGACUCGACUUCCCGCGGUGAGC  
>P493  
UAUGGUGAGGAUCACGUGUAUAAUGCGGGGAGCGGGUAG  
>P494  
GGCAUGGGCAUCAAUUAUCGACUUUUGGCAAAGAACAGAA  
>P495  
GCCAACACAAAGCCAAUAAGACCUCGAAUUCAGUAUUUCU  
>P496  
ACUUAGAACCUAUCCAGAAGACAGCAAUAGUGUUAAAAAU  
>P497  
AGAUUUGGUAUUGCAAUGGAACCCCCAGAUUUUAAAGGGGG  
>P498

AGUUACUGGCAGACAUGCAGGACUGGAGUGGAGUUCACCGAG  
>P499  
AUUACACAGCCCCUCAGCCAAGUGUAGGAUCUGGUUUUUUU  
>P500  
UGUCAACAUGACAGGGUGAAACUAUUCUUUUUAAGACUGUU  
>P501  
UGCUGCGCGAGGUGCGUUUUUAUAGCGGAAGCCUUUGCCGCA  
>P502  
ACCUCCAGUGUAGAGACAUAACUGACUUUUGUAAAUGCUGC  
>P503  
AAGUAGACACUCUCAUUUUUAACUCCCUACCCUAGUCGCCAG  
>P504  
UCUUUUUUUUUCCCCAGUAACAGUUUAAAUAUGGUGCCUU  
>P505  
CAACUCACUUUCCUUGUAGUAGGAGUCUGACUGGAGCGGAG  
>P506  
GCUGUUUACUCAUUGGAGGAACAGUACCUUGGCUUGGCUCU  
>P507  
AUAAGGUGUGUGGAGUAAUGACUCCUGAAAUUAAAUGGUG  
>P508  
UGAGGAGCUCAGGUGAGGGGACCCCAUGGGGGCAGGCAGGG  
>P509  
CUCUGCACUGCUCCAGGAGGACUUCGCCUAUUCAGGGUUUG  
>P510  
UUAUUGUCCCUUUUGUAGAAACAGUGAGAAGAGGAACAGAG  
>P511  
GCAGAUACUGACACCAAGGGAUCCGGGUGCCCCCCCCC  
>P512  
AAAGUUCUUACAAGGGAUAAACGUCUUGUACCCGGAGGUGG  
>P513  
GUUCAUCUUCACGUAUUGGACAUGCCACGAAAGGUUUUAA  
>P514  
CCGUUCUGUUACCAAAGAAAACCGAAAGCCACAAAGCCAAA  
>P515  
GGUAUAUUGGAACUCUUCUAACCUCCUUGGGCUAUUUUUUC  
>P516  
UCAUUGAAUGAGGGGGUUUAACAGCUUAAAGGAAAACAACU  
>P517  
AAAAGAAACGCGGUAUUCGGAACUCAACCUCUACUGUGGGGG  
>P518  
CCUUGGAACAUUUCUACCUGACCAGUGGCAAGCAGCCCAAG  
>P519  
GAAGGAGAAAGUAAAUGUUGACAUUAUCAAUUUUGGGGAAG  
>P520  
GGAAGGCAAACUCCCUUGGACCUGUUUGCUCAUUUUUGGCC  
>P521  
CUCCUUGGCUCGUUCCGCAACAUCUCUCGAUUAUGCGAG  
>P522

GCUGAUCAGGGCCGAGCAGAACCGCACUCUCCCAAUAAA  
>P523  
UUUGUUCAGUGGACGGUUAACCUUCCCCACUCAACCAAU  
>P524  
CCACACCACUACUCCGCUGACUGGGAGGGAUGGUAGCCUG  
>P525  
CAUAAGCAGUGGGGAAAGGACAAAAAGUUUGGAGUGUCA  
>P526  
UGAUGGCAUUGGAAAAGAAAACUUGGCCAUCCUAGAGAAAA  
>P527  
AUGCCUCAAAUAACAUGGUAACACAGAAAAAGUGGAGAAU  
>P528  
CCCGCCCCCCCAUGUUUAAACUUUGUGCCUUUGACCAUCU  
>P529  
CCUACUCUACAGCAUUAAGACUGUGGGACCAGGACCCUAA  
>P530  
CUACAUAAAAAGAACUCUAAACCCACCCUGCAACAAAAGU  
>P531  
AGUGUAAAUCUGAACCCAGAACAUAAAAGGGGUUGAAGAG  
>P532  
CAACCCCUCAAUUUUGGUAACUUGUAAAAGGACUCACAG  
>P533  
GAUGAUUAUUCUGCCUGGGACUCGCCAACUGAUAAAGGAA  
>P534  
UGCCAUCCCCUCGAGAAGUGACUGUUACAGAACGGCUCUC  
>P535  
GGCCUUGAUACCGGAGAAAGACAAGGGAUACCCUGUUUUGA  
>P536  
CUCCCCUAGGGCUGUCCUCUACUGGCGCUCUUGCAUACCC  
>P537  
GGCUUCCAAAUCACUGCUGAACAGAUACGCCGUGGAGGGAC  
>P538  
AGUCACCCACCACACGCAGACUCAUGCACGCACACAGGAG  
>P539  
UAGGAUCCCGAAGUUCAAAAACAUGCCACCAGAUCCUCAG  
>P540  
GAAGUUAUCAACCCGGUGGACCAUAUGUAGGAAAAGAGU  
>P541  
CUAGGACUCGUUUUUUGGGACAUGGUGGAAUAAAGGUCA  
>P542  
AUUGUGAUCUGUAACCGCAAACUGGAUGCUUUAUGUAACAU  
>P543  
CGCCCGGUUCUCCUCCCCGACAGUCUGCAGCCGGAGUAAGAU  
>P544  
CAUAUUAGUAAAAGUGGCAGACCCACGGUUCAUUGGAUUUU  
>P545  
GUACGAUUGGAAAAGCAUAAGCAAAAGUCACAACAAGCA  
>P546

GCAGAGAGAACGGCCGUGUGACAAUCGAAUUAUUCACAG  
>P547  
UUUUCAGGAUUGCUUCAUGGAUUGGAGAACUUUCUAACCAA  
>P548  
UAAUAAUUAUACCGUCUUCGAUGGGGCUAAAGACUAAUCUA  
>P549  
AAUACUCCUAAUUGAUUUUUAAAGAAAAGUCUCAACAAGG  
>P550  
AGUUAAAAAAGAUACAAAAACAAAACCUACUAGUCUUGA  
>P551  
AAUCCCAGCCUUCUAUAUGGACACAAGUCAUUUAUUCAAUA  
>P552  
UUCUCCAGGUAAGUCAGGGGACUAGAGCAAUGCACCCUCAU  
>P553  
UGUCCCAGCGGCGCCCCUC AUCACCGUCGCCAUGCCCGGA  
>P554  
AAGCCGUCGACCCUUGGAGACCCCAACAAACUGCCAGAAG  
>P555  
UGAAGCCUGUGUUGGUAGGGACAUCUGAGAGUAAUGAUGAA  
>P556  
AAA AUGGGUGGAAAUAACACAUGGGCCAGUGGGGCCUC  
>P557  
GAUUGCAGCGAUCCUACAUA AAUAUAUGGAGGUCUCUGUCU  
>P558  
CUGCUAGUAAGUGACUGAUA CAUUAUAAACUGGAUCGGUC  
>P559  
UUUGCACCCUGGGAGGAAGGACCACCCCGGGCCUCUAUGC  
>P560  
ACAAAUUACAGACAUUUUAGAGAUGGGGAUUGGGGAUUAU  
>P561  
UGUAGGGGUAGGGUGUUGGACAGAUUUGAGGGGAAAUUA  
>P562  
CACUGCUGGCUUCUAUUGUGACCGGUGCAAAGACGGAUUU  
>P563  
AAAAGAAAAAUCCAUCAGGAACUCUCCGUCCCCCGGGGCC  
>P564  
AAUACACACCACAUUUAAAAACUGCCUAGGAGGUAAUCCAA  
>P565  
AUUUUCCA AUUUAAA AUUUAACAACACUCUGGCUUCUGAUU  
>P566  
UUGAUUAUGAAACAAAGAAAACUGCAAUUGUGGUUAUACAG  
>P567  
AAUAAAAACAAUAGGGUAAACAUCCCCAAACCCACCUU  
>P568  
AUUUGUUGAAACCCUGGGAAACUUAUAAUCAAAAUACCAA  
>P569  
AGGAAUUGGUUUGUGUGUAGACAUGGAGUUGUGAAACCCAG  
>P570

GGUAUAUUCAGUGCAUUCCCAAACGCAAUCGCGGCCCCUUU  
>P571  
UCUUUCUACCCUCUAAUUUAACAAUGCAUAAGAGUCAUAA  
>P572  
UUAACAGACAUUCAUUAUGGACUUCAGAGAAAAUGAUGCUA  
>P573  
CAUAAAAAUGUGCGCCAACAACGGCAGGCGGCAUCUAAAGC  
>P574  
UCGGCUGGUUUGAUUCAUCCAUUUUGAAGAGACGGGGGAGC  
>P575  
AGACAUCUCCAGUGUGCCAGACAAAUAGGAGUGAGUGUAUG  
>P576  
GGAAAUGGGACUGUGAACGAACCGGAGAGCAAGAAGGGAAG  
>P577  
UGCGGUUUGAGUAUCUAGUAUCUCCUAGCAGUGGAUCAA  
>P578  
UACUACAAAGAUGUGAAGAAACCGGAAAUGCAUAUGAGGAU  
>P579  
CAUCUCCAAUCCCUUCUGUUACUGAAAAGAGGUUAUCAUCU  
>P580  
UGCCUCCAGGCCACUGAAUAACACCCAAAACAGCAAGCAGU  
>P581  
GACUCUCUUAGGAAAUCUAAACGUCUUCGGAAUAGAAAGUA  
>P582  
CUGGGUUUGACUCUAGUUUGACAUUUACUAAAUAUUUAUU  
>P583  
CUCGGUGUCAGCCAUCUUUCAUUGUGUUCGCAGCCGCCGC  
>P584  
GGAAUCAAAAUUCCUUGAGACUCUUUAGCAUUCAUACUUU  
>P585  
GCCCCGCAAUGAAACAGUGACUAAAGCCCCUUUUUGAGAU  
>P586  
UAUUAGAAUAAAUCUCUUAACUAUUUCACCGGCUCUCCAG  
>P587  
UUAAGAAACACUUGCGUGGACAGCCUCUUUUAAAAGUGU  
>P588  
UAUGUUCAGGGACAAAUUAACUUUUUCUAAAAAUGGCCAU  
>P589  
UGUGGGGUGCCCUUGAGAAGAAAUGGCGCGGGGAUUUG  
>P590  
GUAUGACUUACUAGAAACAGACGUUUCUUUCAGCCGUGGG  
>P591  
AAAGUAUCCUGGGAUUUUAAACAGUAAGGCCAUGGGUUUAU  
>P592  
CCUGCUUCUGGUUUUCGAAGACUAUUUAGUGGAACCUUGUA  
>P593  
ACACACACACACCCUGUGGACAUCCAGAGAUUGUAAUUGU  
>P594

CAAGUGAUUGUUUACUAAAAACACAGAAUUCAGCUGGGCGU  
>P595  
UAGGUCCAGCUAGAAGUGAAAAAAGACAUUAAAAAAAAAA  
>P596  
CCAACAAAUCAGGGAACGAGACUGAUAGGUGUCCGUGAUA  
>P597  
UAAUCAGAUGUCUCCAGUGGACUACUGUUUAUAGAGAGAACA  
>P598  
UGC GCGGCCGCCGCUCCUGCGAGAGGACGUUGCGUGCUCGCU  
>P599  
GGCCGAGGUUAUCGUUAGGC AUCUCCAGGCGACCGGCUC  
>P600  
UACAGCCCCGUGGGCAUGGACCACCUUUAUUUUAUACAAA  
>P601  
CGUAAGCUUAGUUUCAGAAAUGUUCCGAAGGUGAAUU  
>P602  
UGGUCCAGAGGAGCCUGAG AUGGGUUGAUUAAGUCCAUCU  
>P603  
UGUUA AACUUGGGUGCACAGACUCUCACGUGGCUCUAGUC  
>P604  
UGAAUAUCCACGGUUUGGACAGCAUCCGGAAGUUUCCC  
>P605  
GAAUUAGGUUGAGAGGGUAAACUGUAGAUUCAUUCUCUGC  
>P606  
CAAAAGGCUCUGCUUCCUAAACUGGUAGAAGUCUAGUCCC  
>P607  
CCCCCCCCCCCCAAAAAAACAAACAAACAAACAAAAAAG  
>P608  
CCAAUGGAGAGAAAAACAGACUUAACAAGUGGAGUGGGUUU  
>P609  
CGAAAAGUUGGCCUUGUUUAACAAAUUGUCCAGCCAGUCU  
>P610  
CGACCCGGAGGUGCUGCUGAACAUAGAAAACCAAAGACGAG  
>P611  
AUAAAUCCGGGUGUGCCUGAACUCAGACCUAGUAAUUUUU  
>P612  
AGGUAACCGGUCAAAAGAGAACACGCAGAUUUGGGAUCU  
>P613  
UUAUUCAGAGCAGUUUUGAAACACUCUUUUUGUGGAAUUUG  
>P614  
UGAGAAAGGGAGUGACCCAGACAAAGAGAGGAAAGCCCCGG  
>P615  
UGUAGUAUCUGUUUUAUUUGACUGCAGUCUCCUUGGUGCAA  
>P616  
UUUUCUAUAGAAGUAAGAGGACCUGUUAGCAACUGUUUAU  
>P617  
CCGAGCUUCAUUGUUGGAGAUCAA AUGGAAACGCAGGGGG  
>P618



UUGUGUUGGCCCCGCAGUUGACUUUUUCAGUUCAUAUCCUU  
>P619  
UUGCGUUGUGGUAAAACAAAACUCAGGAAAGGGGGGAAGGA  
>P620  
GACACCUUGGGCACUUGCUAACAGGAACAUAGGAAAAUUGG  
>P621  
GUCGGCGUAACUAUCGCCUGACAGGGUAUCUGAAGUAAAAG  
>P622  
UAAAUGGGGGGUAGCCAUAACAUUUUUCUGGGGUAGUUUA  
>P623  
GGUGUCUGGAUGAUUCAGGACACACUACGACAGACUGGUG  
>P624  
UAUUCCCUAAAUGCUGGGAAACAAAGGUAACCCCGCCUGGU  
>P625  
AUAUAAAUAAGGGCUGUGGACAGGGCAGGGGAAGGGUGAA  
>P626  
CUGGCUAAAAGAAAUAUUGACCAUUAUUAUCAUUAUGAAG  
>P627  
AAUCUGCCCCAUUCCCCGGAUGAGCCCCGGGAGAGUAAG  
>P628  
CGUGACAUUAGGGCAGUGUAACAUAAGGCCUUAUCCAAAAGG  
>P629  
GUAUCUAUCUACCCGACAGCAGCGACCGAGACCCGGUGGGA  
>P630  
GGGCAAGGACGACAAGAAAGACACCGACGUGGGCGGCGGUG  
>P631  
ACACUUUCAACGCCCCAGACACCCCCAAAUAAGACUAC  
>P632  
GUUGGAGGUGGUCAAGAAGGACUAUGACGCCUUCGGAAGA  
>P633  
AAUGAACAGAUAGGUGGGUGACUGGAUAAAUAACUUCUGG  
>P634  
UCGGCUCUAAGAGUGGGAGGACAUCCAAGAAGAUUGUCAUC  
>P635  
GGUGGGGAGUUGAAUGC UUAACAGCACCUGUGUAGGC UUUU  
>P636  
GAAAGGAAUUAAGGCAACAAGAAGCCCGGCUCCUGGUC  
>P637  
GAGACUUCACAUUUGUCUUUAUUCAGGUGUCCCAAGGCACU  
>P638  
AGCAAUAUCCCUAAAACGAAAUUUGGCAAGCCGGAUCCUAU  
>P639  
GUGGGGAUCGAAGCCUAGUAACUCCAAAUCCGAAACUACAU  
>P640  
CGCAACUAAGUGUAUUCAGACAGCCUCCAGCCAUCACGG  
>P641  
UGUUUACUGUGUGUUAUAUAACUUCUGGCUCCUUCACUGA  
>P642

GCCCAAGGGGUUAAGUGGGAACAAUCAUUAUACGGACUCUU  
>P643  
AAGUUGGAGUAUUACGGGAAUGAGGGGAAGGCUGGUGCCA  
>P644  
CGUGCUGCGUCGACAACGGUAGUGACGCGUAUUGCCUGGAG  
>P645  
CCUCAUUUAUUGGGUCUGGGACUGAAGUUUUUAGCCAGCAU  
>P646  
CGCGUUGAGGCGGCUGCGGCAGUUGCGCGCUGGGAUUGUUG  
>P647  
UUGUUUACAACAACAACAAAACACCUCGCGACGGGACCGCC  
>P648  
UGUAUAAAGAACAGGAAAGAACUACACACAGCAGAGAUGAA  
>P649  
AGAACA AUUCAUUGUUGAGAACUGAUAGCAACUAAUUAUUU  
>P650  
CUGCACUCUGGUCCCUCACCACCCGCCCCCGCUUCUCCCU  
>P651  
UCCAUUUUUUAAAUAGUCCACAAUCUAAGGCUCAAUACAC  
>P652  
AUUUAGAAUUUGAUGCAAGUACUUUACAUGAGAGUCAGCUU  
>P653  
CAGUCCUUCUAAACGGGGAAACAGCACAGGAAUAAAGUUAG  
>P654  
CCGGAGCGCCACCGCCGUCAGCCGCGUCUUCAAGCUAGUC  
>P655  
GGACCAGAACUCCUCCUGGACACAUCCAAUUAAGUGAU  
>P656  
GAUCCAAGCCUCCUGCUAGAGGCUACGCCUGGCUGAGAGA  
>P657  
GUAAGA UUUAGAGAGAGGAGACCAUAUUCACUAACUUUUA  
>P658  
CCCCUUUUUUUUUUUUGAGACCUUGUCUCAUCACUGUGUU  
>P659  
CUGAUGGUUUACAGGGGAGACCCAACUGUUGGUCUCGCGU  
>P660  
UAGCCCUCGAGGUUGCUGUGAGCGACGGAAGGGCACCAAAA  
>P661  
AAGCGGAAAACGGAAGAAGAAAAACCUCCCGGGGACUC  
>P662  
AUGACCGGAAAGAAGGGAUGACCGCGUUUGUGGAAAAGAGA  
>P663  
CCCCUUUGGCUGGACGGGAACACACGUGUGUGGCUCAGGA  
>P664  
CGAGGAUGAUGCGGAAAUUAACCCAAGGUUGGUAACUUUG  
>P665  
ACCCCCACUGC UAAAUUGACUAGCUUAAAAAAAAAAGA  
>P666

CAUAUAAGAUGUGGUGGAAAACAGAAAGGACCAAUAGAUGU  
>P667  
ACAGGGGCCUCAUCUUAGCAAGCGUGAAACUGAUAAAGAGGG  
>P668  
GGUAAAAAAAAAGUAAAAGGAACUCGGCAAUCUUACCCCGC  
>P669  
AAAGAGGAACAGCUCUUUGGACACUAGGAAAAAACCUUGUA  
>P670  
AGAGAAUAGAGGGCUCCUAAACACUUUCUCCUGAGAUGUU  
>P671  
GCUAAGCCAGCUCUACCAUAACAGAGUCAGGGACUCUUAU  
>P672  
UCCCCUGUAUGUUGAGGGUUAGCAAGAGUGGGUCAUAACUC  
>P673  
AUCCUUUCAGAAAAUUCAAGAAACCAAAGUUUUUGAGUUC  
>P674  
UUCAAUGAUUUCUUGGGCAGACACUCUCGAAAGCGAUGGGA  
>P675  
UAAAAGACCCUGUGUCACGAACCCCGCCUUGGUUUUUGAA  
>P676  
AGACCAGGAGAGGAGAUACAGACCUCUGCCCACCCCAACACC  
>P677  
UUUUUUCUCUCUACAGGUGACAGUUAACACCAACAUGGUU  
>P678  
CCCAAUUGGACUUUGUUCUUAAAUCCUUAAUUGAGGAGCA  
>P679  
CUUAUAAAAAUGUAUUUGAUACUGUGAUUUGUUCACGAAA  
>P680  
GCGAUCUUGGUAAUGUUAGGACUUCACGUUCAAGGAAUACU  
>P681  
UCUGCCACCUCUGACGCACCACUGCCAAUGCUGUACGUACU  
>P682  
AUCAAGAUUUCUUAAGUCCAAUGAGGAUCCAUGGACAAA  
>P683  
AUCUAGUUAUCUGGUGGGGACUUGGAGAAUCUUUAUAUGU  
>P684  
UGUAAAUAUAAUUGAGGGAACAGGAAUCAUGAGAUAUA  
>P685  
AGGGGGGGGGGGGUUAUAAAACCAUGAUAGACAUUUUCUA  
>P686  
GGAUAUAUUGGUACAACAUGACUAAAACUUUUUUUUUCU  
>P687  
AAAAAAAAAAAAAAAAAUCAAUCCGACAGUUAAUUAUAU  
>P688  
UUUUCUGAAAUGAAAUAUAACAAGUGGGUGAAUGUGGUUA  
>P689  
GUAGUGACUUAGCCUUAUGUACUCUGUUGGAAUUGUGCUA  
>P690

GGGGUCUAAAUAUCCAAGCCAAAAGUCCAUCAAGGCUAAU  
>P691  
AUUUUAAUGUCAACAGAGAUUGAGGUGUAGAAUAAGGUAG  
>P692  
AAAACGUAAUACAACACAUAUCUAACCAGGGUCCCUCCU  
>P693  
CACCUUAUAUUUCUUUCUGUAUUCAGUAACGGCGAGGGUGU  
>P694  
CUACAAAUACACUAUCAUUAACUGUCCUCAUGCUGUACAUI  
>P695  
CCGAUGGAAAUUGGGGAGCAAGAGCAAGGGGUCGGCGGCCA  
>P696  
CUGGGAAAGAACCACACCUAACUACUCCUCUGGCGAGGCUA  
>P697  
UUGAGGGUCAUCUAAUGCAAACCGUUUACUUUAGAGAUGUU  
>P698  
CAGCCGCCAGCCCCACAUAACCCAGUUAUCCUUUGUAAU  
>P699  
GACUAGGGGGUGGGGGACGGAACAAGCCCCGAUGCCGGGGGA  
>P700  
AGACCAUGCCCCAAAUAAGGACAAUAUAUGUUACCUUGAAG  
>P701  
UAAAAGGGGAGUGAAAAAGACUAAGUCUAAUAGAAUUA  
>P702  
UUAGGUUUGUCAACACAAAGACAUGGAAGAUUAGAGGUUUG  
>P703  
GGCAAAAAACAGGGAUUUGACCUGAAUGUUCUGGGGGUG  
>P704  
CCCCGGGAGAUUCGUUCUCAUUUUUCUACUGCUCGUGGUA  
>P705  
UGGAUUGGGCCUUCGACCUGACCAAACGAAUAUGCAAACC  
>P706  
UCGAUUCAACGGGGUUCGGACCGCGCUGCGCUAUGGAGCA  
>P707  
GCCAAUUGGGUGCUGGUAAGACUUGUUUUUGUAACUAGCUA  
>P708  
UAUUAGUGAUUUUAAAGGGACUCUUCAGGGACUUGUGUAC  
>P709  
AACUGGGACUAGCCAGGGGACCAACACAAAUGGUGGGGGA  
>P710  
AUCAUAGUGGGUGUGAGGUGACAUUUCAUUGUGGUUUUGAU  
>P711  
GGGAUAAAAAUAGUGUCAAACCUAUCCGUUGGUUUUGUGUG  
>P712  
CAACAGCAGUGGUGCUGUGGACCGUGGAUCCUGAGGGUGGC  
>P713  
UGGCACGAACACCUUCAGGGACUGGAGCUGCUUUUAUCCUU  
>P714

UUGUUGAUGAGGGAGGGGAAACUUUUUUUUUUUCUAUAGAC  
>P715  
CAAGUAUUUUUUUGCUGUGGACACAGCCUACGUGGCCAAGA  
>P716  
AGACGGCAUGGUUACAUGGGACACCUAACGAGGAUAGCUAA  
>P717  
AGGAAGUUUUGGCUUUCUUGAUGAGAGAGGCCCCAGCCCGAA  
>P718  
GCGGCUUAUACAGUACCCUAACCUGCUACUAAUCACAGAGA  
>P719  
AAAGCUGAGGGGGGUAGAAAACACUCGAGACAGGGCUGGAG  
>P720  
GCGUAAGUGGAAGGUUGUAAAGACUCUGUUAAGGGAGCCUC  
>P721  
UGUGGACAUGACCAUAAAAAAAUUUUCCCAGUAGGUUUUCUA  
>P722  
CUGCCCAUAGAUGCCUCCAATAUCCCCCCCUCGUGUUAAG  
>P723  
AAAUAUUAUCAAUAGCAAGAAUUCUCCUCCAAAAA  
>P724  
UGCUCUCUUAUAGCCACCUACAAGCCGUACUCAUUUGCAA  
>P725  
AAAUUCCUGCUCCCCUGCAAUAAAGCCUUUUUACACAUCA  
>P726  
CAAAGGGACGUAACGCAAGUACUGCGGGCAGUGUUUGAAUA  
>P727  
UUUUUUUUUAAACACACAUGACCCAUCCAAGAACUAAGAG  
>P728  
UCAUGUUUUAUAAGCACCAGACAAGAGAGCUGGAUCAUUU  
>P729  
UGGGAACCCAAAUUCCAGUGAUCUGGAGGGUCGGGCCACC  
>P730  
GGGUUUUUAUAAAUUCCAUAACUGGUUUGAUGACCGAGCCU  
>P731  
GGCUUCAGACUCCGGCGCCAUUUAGCGCGGAGAGUUUCCC  
>P732  
CAUCAACAGCACUGCGGCCUAGCGGGUGGGAAAUGCAUA  
>P733  
UUUGAAAAGCACCCCAAAGAACUGAUCAGGGGGCCCAUUG  
>P734  
AAAUUUGCAGAGAUGGAGGAACGCUUCUAUCGCUAUGGGAU  
>P735  
AGCGCCCCCUACAUUGCUAUUUUCCUCCUCCCCCUU  
>P736  
AAAAAAAAAAGGCCGCGUGACCUAUUCACCCUCCACUUC  
>P737  
AAAUGGAAAAAGUUAUGGAGGGAUGAAGGAGAUUCCAG  
>P738

GGAAGAAUGAAAAGAAGAAAACUUGUUGGAAAUUUUGGAGU  
>P739  
UACGCAGAAAGUUAGGUUUAACCAGGAUUGGGUUUUGCCA  
>P740  
AACACCAUUAUCGAGUUUAAAACAGAGCUUCUGGAGUGAGCA  
>P741  
GAGGUGGAAAUCGCCCAAUACAGGGCCCUUAUACACAGAG  
>P742  
GGAUUAUCCAACUGAGGAUAAAUAUACCCACUACCCCACC  
>P743  
GUGGCUCUACCUCAAGGAGAACACGUCCAAAUUCGGGUCUUA  
>P744  
UAACACUCUCGGGCUCUUUAACCAUCAAGUGCUGCCCACAC  
>P745  
CACCCUCAGGGGGAGUACAAAACUGUGCCCAUUUCGAACUUA  
>P746  
AAGAUUUGGAAAAAUUGUUGACUUUCGGCCGGGCAUGAUGG  
>P747  
GCAAUAUGGUGUCGAUUUGGACUAUGAAUCAAAAAGACUUU  
>P748  
CAGAUGGAUCAAUUUAGUAACCCCAUCCAAGAUUGAACUG  
>P749  
UAACCAUUCUGUGCCCCUAACUGUGUGGCCGAAGUCGUGA  
>P750  
UCACACAGUGGGCAGCCCAAACUGAGCGCUCAGCCCAUGGG  
>P751  
AACUAGUUUUAAGAAGGAUCAUAGCGGUCCUGGCUUGCCUC  
>P752  
GGGUGAAGGGAAGUGUCUGAUGCACGGCGAGUGAACACCG  
>P753  
UAAUGUCACAAUAGAUCAAAACCUAAUUAUCACAGCCUAGG  
>P754  
GGGCAGCAAGAUGGGGAUUGAUGC UAAUGGGGGAGUUAAG  
>P755  
UGGGCCAACAAAGAACACUAACUAUGCAUGGUGCCCCAGGA  
>P756  
GUGAAGCCC GCAAGGACCGAACACCCCCACCCCGAUUUAGA  
>P757  
CUCUCGUAUCAUGGAUCCCAACAUUGUUGGCAGUGAGCAUU  
>P758  
AUGGGAGGGCUAGCCCCGGGACUUGGGGCCAAUACGGAAAC  
>P759  
UCCUCUUGUUUUCGCUCCGGAUUCUCCAUGUUGGACCCAAA  
>P760  
AUCAUUUUAGGAAAAAAAUUACGAAGAUGUCCUAAGAUGUA  
>P761  
GAAGUGUUAGUUUCUUUGGGACCCAUCUACCCUGACCACAU  
>P762

AAAUUAAAAGACAGAACAAAACUGUGGAUCAUUGCCCUCAA  
>P763  
ACUGUUAAUUUUGGGGUUGAACUUUUUUUGACAGUGAGGG  
>P764  
GGUGUCUGAAUAUACCAGGGACAGAUCAUUUUAAGUACAUA  
>P765  
AUGUACCAAGCAGUGUUCUAUCAAGGAAUUCCAGUAAUA  
>P766  
AUUUUGUUUUUAAAUAUCUGAUGACUCUCUUAGUUAGGU  
>P767  
UCCUGGGUGUGCAAUCCUAUAUGCCUGGGCAGGGUGACCA  
>P768  
GCAUCUGUCCCUCCCCAGGACAUGGGGCUCUCGGUCACA  
>P769  
UUAUGUAGUAGACAGUUGUGACCGAGACCGAAUUGGCAUUU  
>P770  
UGAAUUUCUGUAAUUGCUGACCCAAGAGGAAACACUCUAG  
>P771  
CACCAGUCUCUGAAAUUAGAACAGUAGGCGGUAUGAGAUAA  
>P772  
AAACAACCAGAAAACCCCUAACUUGUACUUGCACACUCAUG  
>P773  
UAGUGGGAAAAGUGGUACUAACCCACGAUUCUGAGCCUGA  
>P774  
AAAAGAAGCGCACGGGCAGGACCUGGGAGAACAUCCAGCAU  
>P775  
CCCAAGAGAGGAUUCUUGGACCGCACAUAAAGAAAGAAUAC  
>P776  
GUUCAGUGCUGAGUGUCUGGACAAAAGUUGAGGGUGUUCUA  
>P777  
GGAGGGUAGGUGAAGAAAUAACUCGAGAAGCCAAAAAAGCA  
>P778  
UCAUUCAACCUACUGAAUAAUUAUAUCAGGUUGGGUCCUG  
>P779  
CCCACAGUCGGUGCUUUUGGACAUACGAGGUGCAGCGCCUU  
>P780  
AAAAUCAAUCCCAUUAUUCACUAUUUCCCAUUAACGAGAU  
>P781  
CUAUACACCAUAAUUCACAGACUAGAAGACAGUUUGCUAUA  
>P782  
CGUGGUUGCUCACCCCCUCAGCCUUGCCUUCGCCGCCGUU  
>P783  
GGCCGAGGAUUUUCUAAUUAACACACAAUAGGUAGAAGGGC  
>P784  
UUACAGGCGGUGGUCAUAGAAGCAGGCUUCCUAAUGCGUC  
>P785  
UUUCUACUUUGGUAGUUCUGACCAUAAUUAUAAUGCCCUA  
>P786

GAUGGAAAGAGUCACAAGCC AUGCGGGUGUCCUCAGGUGAC  
>P787  
AGCUCGGUUGGUGUUUCUCC AGAAGUUUCCCCUUGGGCGG  
>P788  
GAGAGAGAGUUUCCCUAAA ACUGGGGGAGAGGGAGUAAA  
>P789  
CUACAAAUGAGCAUUCUCAG ACUUGUGAUUGGGGUAUCUC  
>P790  
CUUCUUGCCCACUAUCCUAA ACCAGCUGUUCGAGUCCUCA  
>P791  
UCAUAUAACAAAAGGAAUGA AGCAGCCCCGCCUCGCAGUGU  
>P792  
AUUAGUUA AUGGCGAUACAC ACUGCCGAUGCAAUAUAUA  
>P793  
UACUGAAAUGGAGAGGUAAA AUGCCCCGGGGCGGGGGUAUU  
>P794  
GAAAUACCAUUCUUAUGAU ACCACCAGUGAUGAGUUGAAU  
>P795  
CCGUUUUCCGGCUAUUUGGA ACUACUGUAGAGUUUGUAUUG  
>P796  
UUAAAUGCUGGGGUUGUAGG ACACACACCCUCACCUGUGAU  
>P797  
GCCUCCCUUCAAUAUGUAA AGGGUCCUAAGGCGAGCCCUG  
>P798  
UGGAAACAUAACAAGGAGG ACUGCAUCAAAACUAAAAAGCU  
>P799  
CGUCCGGGGCUAUGGCUGUG ACUCUGGACAAAGACGCUUAU  
>P800  
GACACACCUAGAGUACGAAA ACAACGCGCCACUUUAGCAC  
>P801  
AUUUCUAAACCUUUUUUAAA ACUUAUGUGUAUGGGUGACAU  
>P802  
GAGUGAAGCAUUGGACUGUA AUCUAAAGACAGGGGCUAAG  
>P803  
AUUCCACCAGCACCACCAAG ACCUGAUUUUGAUGCUUCAAG  
>P804  
CUUCCCCUAGACUUUGUUAA ACUGGCCGGGUCUCCAGAAGG  
>P805  
CCCCCGUGGUAAAAAAAAA AUCUCUAGCUAAUACAUAUA  
>P806  
UGAUCAGCACGGGAGUUUG ACCUGCUCGGUUUCCGACCUG  
>P807  
UUAUUCUAGACACAAUCCUA ACAUUAAAAAAAAUUUGACAAA  
>P808  
UAAAUUGCGGAUAAAGAGUA ACAGUAAUAAAGCAAAGGUGA  
>P809  
UCACAUAGAAGUUAAUUUA AUGGUAAUCAGAGCUGGCGGC  
>P810



GAAGUGAGAGAGAUAGCUAAACCACUCUGCAUAAAAGAGAA  
>P811  
GUAGCUUCUUCUGGCUUGAAACCCCUCCCUGGAUUUUAUA  
>P812  
CAACAAAAACAACAACAUGACAACAAGAACCCCGGAGGGA  
>P813  
UUGAGCGAAUGGAUGUUGAAACAGAGAGGCAGCGUUGGCAA  
>P814  
GAAAAGGAAAGGGAAGAAAGACUUUAUUCUCUCUCUUAUUG  
>P815  
GGAGAACUGUUUGAACCAGGACCUGGGAGACGGAGGUUGCA  
>P816  
UUUUGUAUAGUAUUAGGGUGACUUGUGGCUGGGGGCUC CUG  
>P817  
UAGGAUAACAAGUGUUAUUAGUAGCCAAACGCCUCGAUGA  
>P818  
AACAAAGACUGUGGCAUGCUAACUAGUUACGCGAACCCCGAG  
>P819  
GGGGAAGGUGAAUUAUGGUAACUUUUAUGAUCUAUUCAGG  
>P820  
AAGUAAAUCAAAGGAGUCAAGGGGAGGGUAACCCGUUGGA  
>P821  
GCAGGAGUAGCAGGUCUGGGACAGGGGGCCGGUGUACUUGA  
>P822  
UCGGGCCUCAGCAAUUCAAACCGAGAUAAAGAAAUCAAAA  
>P823  
GGGGCCGGGCCUCAAGGGGACCGGGAAGCGAAGGAAGAAG  
>P824  
CGCCAGACUGUCCUUGAGAGACACAACCGAAGGAGGCACAC  
>P825  
GGACGGCAGCGAACUCAGCUACUUUGGCAGGAGGGGAUGA  
>P826  
AGUUCUAUUGGACUCAGAUUAUCUAGAGCUACUACAUGUAU  
>P827  
AGUUUUUAGUAAGGUUAUUAACAGAGAUAGAGGAUUUAGAG  
>P828  
AACACAGGCAGUUGGGGUGGAUAGGGUUUUUCUCUAAAAA  
>P829  
UGUCUUUUCUGCCACCGUUACCCCUCCGAGACUCCGUAAC  
>P830  
CUCCAGAGACACGUAAAGGGACAGAGAUUGGGGGACAGAAG  
>P831  
GGACAUUUUCAUCCGGAUGACCCUCACUGUCAACAGGUGG  
>P832  
AUAGAAGCCUGGUGUUUAUAAGUAUAACCGCCUCUCACACC  
>P833  
AAAAAUAAAACGUGCAACAAAUUAAGCUUUGGUUGAUUAAA  
>P834

AUAAUGGAGCAAGUGGCCAAACAUCAGAAUCGAUUAaaaaa  
>P835  
CACUUUACUGGACAAUUAUGAUGGAUCACUAGGCUCUUGGG  
>P836  
AGAUCGACCCCGCGCGUGACCCACACCCACCCACUCAU  
>P837  
AGAGGGAGCAGACAGUGGGUACCACGAUCUCCGUAACCAU  
>P838  
GAAACCUUGUUUGCGCAACAUCAGCGCCGCGGAGCCGCCA  
>P839  
GAUCAUGCAUUCAUUCAUUCAAAAGGAAUUGAGGGGAGUU  
>P840  
UCGACGGAUGCCAAAGUGGAACAGAUGUUUCAGAUACUGUU  
>P841  
ACUGGCAGCUUGAGGGUUCAAAUAGUCAGCAGAUGAGACG  
>P842  
GGAUUUUUUUUUUUUUUUGACCAGAGAAACAGCCGUAUCG  
>P843  
UUAAGGCACCACAAAACGUAUCUGUGAUACGCCGCUUUGGG  
>P844  
CCCGCUCAAGGAGAGAGAAAACAAGAACAACCCGACGUCGA  
>P845  
UUUUUCCACGUCCACGAGACACUAUUUUCGGUUCUCUGG  
>P846  
ACCUACAUGUCUGUUCCAUAGCACCUUUCAACGUAACAC  
>P847  
CUAGAACCUCAGCAUCCCCAUCGUCUUGGAAGCGGGGU  
>P848  
GCUCUACCUGUACCUGUUUGACUACACCGACACCUUCCUAC  
>P849  
CUGUUGGAUAAAGUGGUUAAAUUCCCCAUGCACAAGGCAU  
>P850  
AAGAGAGCACGUGCAGGGAAACUGCCCUUUAUAAAACCAUC  
>P851  
UUACGUUUGAAACUCUAUGACAAGAUUGACCCAGAGAAGG  
>P852  
CACCUGGCAGGUGGUACGGGACAUUUUGCAUGCCACGUUUG  
>P853  
AACUCGAAAGUGAAUGGGGACACAAAGAGAAGGUGCUUCA  
>P854  
ACCACGGGAAGACCACGCUGACUGCAGCCAUCACGAAGAGU  
>P855  
CACUUCUUUGGUAUCCCUUCAGUCUGGGGCCAGAGGCCGCA  
>P856  
CCUUUUGCGCGGACCCCAUUACAUAUUUUUUUUUUUUUUUU  
>P857  
AUAUGGCUACCCUCAACAGAACUGCUGCAGGUUUAUGCAC  
>P858

ACCUGGUACAAAGUUUUCAGACAUGGGACAGCGGUCCUGU  
>P859  
CCACCGCACUAGGCCGCCGGACACUGUCGGGUCGUCUAAA  
>P860  
GUGGUCUCACUAACCCCAAAACUGCGCUCGACCCGGCUGCG  
>P861  
CCAGCUUAAAAUAUAUUGUAACUUCGGGAUGUUUAUUUAA  
>P862  
CGUGCAUGUUUCUCCUCAGGACAGUAAGGACACCCACCA  
>P863  
UGACACGCUCAGUUGAAAUAACAACAGACAAUUAUUUAGAA  
>P864  
GAGGUUUCUCGACAGCAGGAACUAAUAGAAAAGCAACGAAG  
>P865  
UGCUCAAUAAGUCAUUGUUUAUGACCCCAAAGAUGAUGAAA  
>P866  
AAUCACCCCAAAGGAGUGGACAUUCCUAACAAUUCUGUA  
>P867  
AUGGGGGAGGCGCACAUUAAACAUCCAUGAAGCGGUAUG  
>P868  
CCAACCAUCCCACAUCACAAACUUUGGUUUGGGGGACUUUA  
>P869  
GAGAGAAACCCUAUGAAUGUACUGAGUGCGGCAAACUUUC  
>P870  
CCCCCAACCCAGGAGUUGGACCGGGACUCGGAGGAGGAGG  
>P871  
CCUGUCUCACACCGUAGUGUACGGCCCCUCCCGCAAAGCU  
>P872  
GCCAACAACCCCGGCUUUAACACCGCUCGUCUCUACCAG  
>P873  
CAACUCCCCACGAUGGUGAACCUCCUGUUAGGCAAAGGCA  
>P874  
CAGGAUGGAUUUAACUCGAACAUCGCAGACACAAAACUGA  
>P875  
UUGUAUCAGCCAAUGCUGAGACCUUCUCCCCGGAUGUCUGG  
>P876  
AUGGGGCCCGCCAGAACACAGACAAGGGCAACAACCCCAAGG  
>P877  
UCCUUUUUCAGAGCCAGGAACCAUUGCCGGAUGAUGAUGA  
>P878  
GGAAUUGGUGGUGGUGACGGUGGGAGUCGCCGUGUUA  
>P879  
UCCCAAGGUGAGACUGGAGACAAUCUAUAUUUGCGGAGUA  
>P880  
AUUUUAUUUUUUGGGCCAUAACCCCAUACCCCUUAUUGCUG  
>P881  
ACUUACCUGAGAACCAUAGGACUGUGGCAAACAAAACCAAU  
>P882

ACUCGAGGGACAAGGAACAGACUCAUAAAUAUUAUUGGC  
>P883  
AUGGGAUCUGAUCACAUGUUACUGUCGAAAGCCCUUGCAG  
>P884  
CUUAUUUCCCGUGGCCAGGACGCAUUUCUCUGAGUGGAAA  
>P885  
AUAGGCGGGCACUCCGCCCUAGUUUCUAAGGAUCAUGUCUG  
>P886  
AAUUUUUAUAAAUGUGACGAAACUGCCCCCCCCCCCCCCA  
>P887  
UAGUGCUGGGUCCACUAUGC AUGGCGGAACGGUCCGGGCGC  
>P888  
UGGAAACGCAGAGGCAGAAACCAGGUGUGUUUCUACUU  
>P889  
AAGUGCCGUCAGAAGCGAUAACUGACGAAGACUACUCCUGU  
>P890  
CUAUACCUUUUAUGAAUUGACUUUCAUAAAUUGGUUAUGU  
>P891  
GCGCUUUAUUGCAGGGCUCGACCUGGGUAUAGGGGAGCAA  
>P892  
CUCUCCACUCCCCAAAAGGGACCCAGCACCCAUCCCAAGGA  
>P893  
GAAUUCUACCUGAGUUUGCCAUAAAGUGCCUGCCCUCUAGC  
>P894  
CAGGAGGUUGCUAACCCAGAACACUAUAUAAAACAUCCCU  
>P895  
UUUAAAACAGCACUAAAUAACUUGGGGAAACGGGGGGAG  
>P896  
CUCAAGAAUCGCCGCGGGGACCGCCUUCGCCUUCGUUGA  
>P897  
GGGUUGGGUACAACGAGAGGACCGGGGUGGGGGCACCUC  
>P898  
AGCUGUGAAGAUCCCCGAGACAUGGUGGUUUAGAUUGAG  
>P899  
AAUAUCGAGGCCAGCUGAGGACUAAAGAGAAAGGUGGUUG  
>P900  
UCUAGAAAGGACAGCACCCCAGGGGGCCCGUGCCGUGGGCA  
>P901  
CUUUGGGGCCGGCUGGGCAAACCUUGAACCCCAAUUUCUG  
>P902  
ACUCCCUAAAAGCGGUCUGGACAAAAGCGGCUACUUCGAGU  
>P903  
AACACUUAGAAGACAUCUUAACAGUUGGCCGGGUAAAAA  
>P904  
AUUUCAUUUGGGGCAAAGAAACAACGUAGUUUUGUUUUUGU  
>P905  
GUCGGUCGGUGUGGGACAAAACACAGAUAUACAGCAGAUAG  
>P906

CUAUUGGUGGGAAUGACGGAACUGGGGAUUGCGAUGAUUGA  
>P907  
CCAGCGUGAGUUGGAGGAGGACUCUUUUGGGCUGGCCAUGG  
>P908  
AUUUUGUUUCACGGAAACAAACUCGUUCUGCUGUCAAUCUG  
>P909  
GGUGAUGGUUUGCCCGCGUACAUGGGCUGAGGAAUGUUCA  
>P910  
AAAAAAAAACCCCCACAAAAACUGUCCACCAGAAAAUAA  
>P911  
UUGAUGACAGUAGGGAAAGAACCAUUUCCUACCAUUUACGU  
>P912  
UCAAAAACUUGCAUGAGGGGACUCCUUCAAAAGAGUUUUCU  
>P913  
UGUGUGGGCCCAACCAGUGGACAAUGGAGUCUGGGGGAGGG  
>P914  
GCUAGGAGGAGGCGGUAAUUUGCGGCCCGGGGUCCCCC  
>P915  
CCCCGUUUUGAACAUUGUGUAACCGACAGUCUGCCUGGGCCA  
>P916  
CACCAGGGGAAGAAGAAGAAACAGAACAAGAAUCGCAUCUC  
>P917  
UAGAGACCCACCUCUGUGAACUUAUUUUUCUUCUUGGCC  
>P918  
CGUCUUGGUUCGGGCCGGGC AUAAAAGGCUUCGCGGCCAG  
>P919  
UCGCUGCCCCACAAGUCUGAGUCCUUCUGGUGAGGCCAA  
>P920  
UGUGUAACCUCCCCGAGCUAACCGAGGGCAACCUCCUGAAG  
>P921  
CCGCAGGAAGUUGCUGCAAAACUUUUUUGGGGGUGCAGCC  
>P922  
UUUAUUAAACCCCGAUCAUAACCUCCAGCAGGCAUUUCAU  
>P923  
UCUCAGUAUUUGAAUAUGGAACAUAUGCACAGGGGAAGGAA  
>P924  
GGUUUUGAGGGCAACAUUGACUCAUUUGCCCCUCCCUCU  
>P925  
UAGGAAAGAAUCAUCAAGGGACUUAGUUGGAGCUUCUCUA  
>P926  
UGAUGUGUUGUGCUUUUUUAACCAAGGAGGGCCAGUGGAU  
>P927  
GAUGACCGACCCCCAAGAAACCCCGCCAUGGAGGCUUCAU  
>P928  
CUGCCUCCACUUUCUUGGGACUUGGAGGGAGGUGGAACAG  
>P929  
UAUUAGAAGCCCGUGUUGGAACCAUGACUGUGUGUGUGU  
>P930

CUUAAUGCCCGGACACGGCGAUUGGAGCGUCGGGCACAUUC  
>P931  
CUGGUCUGAGCCCAAUAAAGACUGUUAUUCUCAUGCGUU  
>P932  
CCGGUUGCGCGGGCCCUCGGACCCUCAGGGUAGGCGAGGGU  
>P933  
GGUCCCCUCCUGGGUUUCUUACGUAGUUGAUUUUCCUCUU  
>P934  
GUUAUCUCAGGGACAUUCAAAACAAAGGAGGAGUCAUAG  
>P935  
CGCUUUUCUGAAAGGUCUGGACCGCCUCCAUCUCCUCCUCG  
>P936  
AAAAAUUUCAGACAGAAAUGAUGAAUCUCUUAAGGCAGUC  
>P937  
CACACGUGCUCAGGCCCCUCACCAAGGAAGGCAGCAGGCC  
>P938  
CACACAACGGGGGAGAGAAGACAGGGUUGCUGCAAUAACAU  
>P939  
CACAGCGACAAUGACAGCUGACAAGGAGAAGAAAAGGUAAG  
>P940  
UUUUUAUUUGCAGUUUAGGAACUAUUAGGAAUGUCAGGACU  
>P941  
UCUUAUUCaucugugagaguAUUAUCCCCUGAACAAAGGAU  
>P942  
UUAACCAUUUAACUUUCUACACGUGCUGUGUGUAUGUG  
>P943  
UGCCAAUAAGUAAAACAGAAACAACAAAAUCAGUGUUUAG  
>P944  
CUCAUCCAUAUCUAUCUCCAUUUUCCAUAUGGUACCUCU  
>P945  
GGUGGCGGGGAGUUCCCAGGACUGCACAUAAAAUUAUUA  
>P946  
AUAUGUCCAUAAGCACAUGACUAUAUAUAUGUAACAGACA  
>P947  
GAGGCUCCCAACACCUUCACAGGGAGGCUAGGAAUCUAUUU  
>P948  
GUUUUUUGAUGUUUGUGCGGACGGUGAACCUCUAGGGCGGA  
>P949  
AAAACACAAAUGUUUUGAGGACAAAACAUUGAAUAUUGUA  
>P950  
ACGUAGCCAUUC CCCAGGUGACCUCUGUCGAAUCAAGCCC  
>P951  
GAUUCUGUGGAAAUGGGUUAACCUUUAUACCUUUUAAGUA  
>P952  
CUAACAGAUUAGGGGCUAAAACGAUUACUGACUUUCCUUGA  
>P953  
UGGAUUUAGAUCGUAGUGAGACAGGUUAGUUUUACCCUCCG  
>P954

GGGGGGCGGGGGGAGUUGAACA AAAUAAAAGCAAGUCAAU  
>P955  
GUAACUUGCUGUAAGCCCUGAUACUCUCUUAGGGUAUCCAA  
>P956  
AGUUUGCUGAGAGAAAGGAGACGACAGCGAAAAAAUAGGGA  
>P957  
GCCUAGGGGAAAGUCCCCGGACCUCGGUCAGAGAGUGCCAC  
>P958  
UUUUAUUUUUCAUCUCUAGACUGUCAAUUCAAGUACAAAA  
>P959  
UUCUCCCUACAGAGCUUGAUUUUGGGCUUUAAGCAGGAGAG  
>P960  
CAGAGUUAGCCGAGGCCGCCAUUUGAAUAAGCGACCCGGC  
>P961  
GUAUGUUUGAGUGGGUGGGAACAAGUUUGUACAUGGCGAU  
>P962  
AUUUAAGAUUCACCAUGC AUUUCUUGGUCUCUCGCAU  
>P963  
CAAAGUGGAGGGGGGAUGAGAGCCGCAACAAGGUUCCUUA  
>P964  
AGAGAGAAAAAUGUGUCUAGGGGAAUCCAAUUGUUUAAA  
>P965  
UGGGUUCAUUUGCCCGGUGAACUCACUUUAAGCAUUGGAUU  
>P966  
CGGGAGGGCCUUGCCGUCCCACCCUCCCGGGAGCAGGAGGA  
>P967  
GCCCCAGACCAUCUCUUGGAUUGAGGGUGUGUGGGCUGGA  
>P968  
GAGGGGAAUAAUACUUAGAACCUAUAGAGAGUAAAUCUGA  
>P969  
AAUAGCUGAAAUCUCAAGCCAGUAAUAAGGCUUCCGUCUU  
>P970  
GAUUUUUAAGCAAAGAAGUGACAGGUUUUAGAAGGAUCUCU  
>P971  
CCCACCACCCUGCCCAGCUAACUUUUGUAUUUCUUAGUAGA  
>P972  
GGGGGGGAGGUGAAAUUUUUAUUAUGUGCUUGGCGAGGAGU  
>P973  
CUGGGGGGAUCCUGGAUUUAACUGGCGACUGUUUUGGGGGA  
>P974  
GUGUUUCUGAGAUUCUCCGGACCUGCAGCACUUUUACUUA  
>P975  
CCGCCACCGUCAAUAGGUGGACCCCUCCCGGAGAUAAAAC  
>P976  
UAAAUAAAUAAAUAAAUAACCCCGGGCAAGACUUUUCUU  
>P977  
AAUGUGGGGGCCUUGGGGAGACUGUUCGAGAACGUGCGGUG  
>P978

GGAAAAUUAUUGGGCUAUCAAACUCGCUACUAAUGCUGCAGU  
>P979  
UAUGACCAUCAGCGCUUCUGAUACCGAACGCCGGCUUCCAA  
>P980  
UCCCCGUGAAGAGGGGUGAUACUGUCGCAACUCUUUCUGAA  
>P981  
GAAUAAUAAUAAAAAGCCCCAUUGGAGUGAGGCGGGGGUGG  
>P982  
AGGCAGGCCUUGGUGAAGGGAAGGGGAAUCCACUGUUCGU  
>P983  
AGGAACCGGAACCCGCGGUUAUAAAGUAAAGGAACCCGAGA  
>P984  
GAGGGGAUGUGGGGCCCAAACUCAUAAUUCACUGAAGAC  
>P985  
AGCGGUGGACCCAGGCGGCCAUGUCCCGCCUCGCAUGCGC  
>P986  
UCCGAGGCAGUAAUAACUGAACAAAGCAGCCUGUCCCUAG  
>P987  
GAUUCUUUUUCUAGGGAUGUAUACACAUAUUUACAAUAA  
>P988  
AGUGAGGGGAGAGGGAAGGUACCCGAGUCUGUUUCUUGUUA  
>P989  
GAGUGUGCAUGCGUGGGGUGAGUGAGCGAGUCGGGGGCCG  
>P990  
GGGUACAGCGCCCGAAUCGACAGUGUAGAACCAUUCUCUA  
>P991  
CCCAGAGCAGGGUUUCUGAGACUUCGCGUCAGGAUAUGUCA  
>P992  
CUACCUCUUGACAGCAAUGAUUUUUGGGUCCAUGAGGGUUG  
>P993  
AUGCUGUAAUACCGGCCCCACCCGAUUGACAUUAAGUUUA  
>P994  
CCACUUCUGCUAGCAUCUUGACAACUUUUUGCAGGGAAAAC  
>P995  
AGAAAGACUUUUUGCCCAAGACAGUGAAAGUAAUUAUAAAA  
>P996  
GUCGCGGAGAAAGGGCCGUAACCGGAGGACCCACGCCCCUG  
>P997  
UUUUUAAGGAGGCGCCAGGAGUUCGCGGCGUGCGCGGC  
>P998  
AUACAGUAGGUUCCUGUGAACCCUGUGUUGGUUCAAAAAG  
>P999  
AUUUCUAUGCUUCGCAUAUAUAGUUGCCACAGUUAAAAAA  
>P1000  
UGUUGCCAAGGAAUACUUAAGUGGUAGAGGGUGCUUGGCU  
>P1001  
AAGGUAGUCUUCCCAACUGACUGUAGGGUUGUGUCUUUUC  
>P1002



GAGCCAACAACAACGCAAGAACCUUUGGUGGGCAGCCAAAA  
>P1003  
AGCAUCAUCUCUGUAUAUGAAGGACGGAAACCCGCUUUGG  
>P1004  
UCAUUUAUUAUUAUCAAAAACUGAGAGGGUAAGUAUUCAG  
>P1005  
AAAUCACCACUUUCUAAGAGACUAUCCCCUCAGCCACAAAU  
>P1006  
AGAGAAAAGGAGGGGACGGGACAGACGAAGGCAACCAUUUU  
>P1007  
GCUGGAGUAUACACCCUUC AUGGAAAGGGAAGUCGGCAA  
>P1008  
CUAAGGAGAGAUUUAUUCUGACUGGUGGUCUUAUCCUGGU  
>P1009  
GUGAGUGGGUUAGAAAAUUAACAAGUAAGAUUGAUUGGGUU  
>P1010  
GAGCAGUCACCUAGGAGUAGACAAGGUGGAAUGGGAGGAGA  
>P1011  
AGGGUGAUGUGAGGGGAGGAACAACCAUGAACAGGUGGAAU  
>P1012  
UCCCUAUGUCCAAACAAAAACAAGCCCCCCCCUUUUU  
>P1013  
UGAGGGUUGCUACGCUACCGAUGGUGAAGCGACAUGAGAAA  
>P1014  
AUUUCUACAGAAUCCCUAACCCCGUAGAGUACAACACCA  
>P1015  
AGCCUGUCUCGUGCGUCUUGACUUUCCCAACAUCUAGAGGA  
>P1016  
ACCACCUCUCAUAAGGAGAGACAACUAGCACACUAGUCAUA  
>P1017  
AAAGCAAGGGCUUCCAAUUCAGAUGGUGAACUAUGCAUGU  
>P1018  
UCCCGGGUGUUAAUGGAGAACCCGGCGCACACGAUGCCAA  
>P1019  
GCAGAGGUGUGCUUUUCAAGACUCACCAAUACUGUGUUUU  
>P1020  
AUCAUCUGCAACA AUUUUUGACUCAGUUUAUUUACUUUUGC  
>P1021  
AAGGAGAAGGACUACCCGGGACUGCGGCCGCCGUCAGGU  
>P1022  
CGUGUGCCUGAGUGGGCUCUACUGCCUUGUCCAUUAUUAU  
>P1023  
UGCCAGGCAAUGGGGGAGGGACAAGUAAAUAUUAUUAU  
>P1024  
AGAGGUUUUUGACUCCCGGACAGUACAGAUUUAGGGACCC  
>P1025  
UUAGGAGUCCUAGGGAAGCAAAGCAGCUAACUGCGAGCAC  
>P1026

CUAUAAGAAAAUGUGUGGUA AUGUAGAACCAAUAUUCAAA  
>P1027  
UGGCUAGCAGCAAUGGUGGACACCUCGAUGUGGUUCAGUU  
>P1028  
AAAUUGUAACAGGAGAUGAAACAUGGCUUUACCAGCGCAAU  
>P1029  
CUACUAUAGCUUAUUUCAAACAAGGGUAAAAAAGGAAA  
>P1030  
UAAUUUACCUACUCCCAUGGAGCUUGAGCUGGGUUUAGAUU  
>P1031  
AAAGGUAUGCAAUUAUAUUA AAAGUCCCUGUUUUGUACACA  
>P1032  
UGACAAGCCCCACCCCGGACUUUACUAAUGAGCUUGUUA  
>P1033  
UUGUUUAUUGGAUUGGCCGUAACUUUUAGAAAAAAUCUUGU  
>P1034  
AUAUUUUCUUGUCAUGAUUAUGCAGUUUUAUCUGGUAAGU  
>P1035  
GUUCUUUAAAAACCCUCUUCAAACGGCCAAGGAAUCUAGG  
>P1036  
UGUGCACAUGCAGCGUUGUUAUUGUUCUGUUGUUAUCAUUU  
>P1037  
ACUUUUGGAGUAGGGUUCUUAUGAUGGAACAGUGAAGGUCA  
>P1038  
CUAGGCCAUGCAGGGGAGAACUUUAAAUAAGAGAGUU  
>P1039  
AUAUAAAUAUAAAUGUUAAA AUAGUAGUCAGCGUAGGAUA  
>P1040  
AAUUUGGUUUUUAUUUAAA AACGAUUUUCACUGACCCC  
>P1041  
UGGUAAAUAACGAUGCUUACUGGAGAAUCCGUUCUUUUC  
>P1042  
CUUAGGGGUGUGGAUCGGCAUAAGCAGUUCUGGCGCUACU  
>P1043  
AAUUAGAAUCUGGCCCUCAAACCCACAACAGGACUUAUUA  
>P1044  
GAACAGGACAAAGCCUAGA AUUACAAACGGCCGGUAUUA  
>P1045  
AGGAAAAAGAGCCCAGGAGACCAUGCCUGACAAGAAUGAG  
>P1046  
AACCUGUAAAGAAACAAAAGACAGGUGAGACUUCGAGAGCC  
>P1047  
CAUAUAUACUUUCAAGAUAAACUUAGGAAAGGGAAGAAACU  
>P1048  
CUAUAUAGUAGUUGUAGAAAACCUAGACAAACCAUCCAGUU  
>P1049  
CUAGUUUUCGUGGUUUAUUGACAGGGUUGGGGUUUUUUUU  
>P1050

UGAAGAAAGGUGGAUCACUC AUGCCAUUUGUAACACCGCCG  
>P1051  
GUAAAUAUAUAGGCAUAA ACCGAGGGAAAAGUGACCGGG  
>P1052  
UAAGCCUUCAAUUACAGAA AGCGCCGAUUAGCAUUGGUCU  
>P1053  
GACCUGGUAGAAUCUCUCUA ACCAUUUGAAGUUGAUUUCUC  
>P1054  
CAGGCCACCCCAACAACAA CAAAUUACAUAGCCCCAAU  
>P1055  
UUUAAUCUGUCCUGCAAUUA AGUCAGCCUCCACACAAUGG  
>P1056  
CGUAACAUUUACUAGGUAGA ACAGGGGAGAUAGUACAGAUU  
>P1057  
AAUAUUUACUCCUUGUCUCC ACCCAUAACCGUAGCAGGUGU  
>P1058  
UUACGGCCAACCCAUUUUUA CAAAGGCACCAAGAACAUC  
>P1059  
UAAUCUUUUGAGAAGAGAUG ACCCUCGGUUGCUGUGAAAAG  
>P1060  
GAUACCUAAAACAGGGUUUU ACUGUAAGCUGUGUUCACUCU  
>P1061  
UCCGUCAAGUACACAAAGUA ACUUUGCGGGAUUUUAGGGU  
>P1062  
AGCAAUCCUAAUGUGGUGA ACAGCACACACACUUACCAAC  
>P1063  
AGGUGUGAAGCGUGUGCUUU AGUUUCGUGGGAGGCCUGGCA  
>P1064  
ACUCAUCUUGACUUUCCCA AGUUAAGAGAAAAACGGGUGA  
>P1065  
GAGGGGCCUUGGGGCUUAG ACUCAUUUUGAAAUGUCCUUU  
>P1066  
CGAAAGGUCCCCGGUUCGAA ACCGGGCGGAAACAGAAUCUU  
>P1067  
AUGGAAGACCGUUACCCCGG ACAUGACUGCCCCAAAAGGGG  
>P1068  
GGCGAAUCUGGCUUUGGGGG AGAGGAAGAAAAGUCGGAUU  
>P1069  
AAAAAAUGAUGGUGCCUCU AUAGGGCCAAGACAGAGGAAA  
>P1070  
ACUACCGUCGCUUGUUUUUC AGAUUUUUGCGGCUAUUUUCG  
>P1071  
UGACAAAGGGGAAAAAUAAA ACCCCACAGAAAGAAGCAGGG  
>P1072  
AUUUCCACCAGAGUGUGGA ACCCGUGGUCAUGAUGCACAU  
>P1073  
UCUUUGCAUUUAAUGUUGAU ACUGUAAGGGUGUUUCGUUCC  
>P1074

AGAUGAAAACAACUAAAAGACCUGGGGGCUCGAGUUCG  
>P1075  
CGUCGUGGGCUGUGCGGUCAUUUCGGGCGUCACGUAACG  
>P1076  
AGUGUUUCCUUUAUUUUUAUAGCGUAUAAAAGUUUCUGA  
>P1077  
UGGCGUCCACAGCGGGCUGAACCAACUAUGGGAAUGCAG  
>P1078  
CCAAUACUUUCCACGUUGGACUUUCCCCUUAUUGGGUCU  
>P1079  
GAGGAACUUUAUUUUUAAAAACUACCUUUUGGCCGGGCACA  
>P1080  
AUUCUGAGCCCCGGGGUAGACAGUCCUCAGUGAGGGGUUU  
>P1081  
UUGCGUUUCCGUGGGCGGGAGAGCGCCGGUCCGUACCCACG  
>P1082  
UUUUUUGGGACCUUGGGGAAGGGAGGCCAGAAACCUCCG  
>P1083  
AUUUUUUGAGUCACAAAAAAAUCCCCUCGAGUGUUAGCU  
>P1084  
UCAGAGAACUUUAUCUGGGGACCGCCUCGAAAAGAACAGUC  
>P1085  
UGUUACAUUUGUUAAAAUAACUUUGGGCAUUUGGUUAGGA  
>P1086  
UAUCUGAGCCUACAUAUAACUUGUGUGAUUUCAAUUAA  
>P1087  
GGAAGACACGUUUGGCCAGACCCAACUAUGAUUAGAGCCA  
>P1088  
AGCAUGCAAGUUCUGCUUCCAAAACCUCUUUGAGCCCG  
>P1089  
CUUCAGCCGCCAUCAUUAUUUCUACCGCGACCUCAUCAGC  
>P1090  
GACAGCACUGCAGGUGUUUGACCCACUGGCAAAAACAUGAC  
>P1091  
ACAGAGGACUGACCGGUUCCAUUUUUUUUUUCCAGACAA  
>P1092  
GGGUGGGCGACACCUCUCAUGGGAGUCCGACUGUGA  
>P1093  
GAAAGGAGAAUGUUUUGUGGACCACUUUGGUUUUCUUUUUU  
>P1094  
CUCGGCUGCACUUGGGCAAGAGAUAGCUGGAGCUAUCGCCG  
>P1095  
ACAGGCCUUAGAGAGAGUAGACCAGUAACCAGAAAUAACCA  
>P1096  
GACGGACAUCACAGGAAGGGAAAUAGGGAAGCUGGGUUUGG  
>P1097  
CAUCAGCAAGCUCCAGUGCUACGUGUCCUGGCAUUUUAGG  
>P1098

UAAAGAAAAAAUAGGGAGGACCCAAAUAGACGCAAUAGA  
>P1099  
AGCAGCUUUUUAAAAUUGUAGUGUAGUAUGUGUCCUUAUG  
>P1100  
AGGUGGGCUGUGACCACCGGACCUUUUCAUAAGUGGUGGCA  
>P1101  
UUUUCAAAGGAGAUCUAUGGACCAAUAUUGGAGCGAAUAA  
>P1102  
UACAUACUGCCUUGUUCAAACCCUCAUCAUCUCCUGCAU  
>P1103  
UGGCCGGAACCUCAGAAAUCUCGCAGACCAGUCGUUUC  
>P1104  
GGUUAGUACUUGGAUGGGAGACCGCCUGGAAUACCUGGUG  
>P1105  
AAUUAUGCCUGUGGAGAGUAACUCACCCGUAGGGCCCAAAG  
>P1106  
AAAACGAGAUUGGGGAAGGGACUUGGAGUACUAAGUUUUGA  
>P1107  
GGCACCCGAGGCAUUAUUUGACCGGAUCUACACCCACCAGA  
>P1108  
UGGUUUAAAAUUUCAGUGAGAAAAAGUAACCACAGGGGUA  
>P1109  
ACCCGGGGCUUAGUGAGGUGACAGAUGUGAUGUUGGCCAAU  
>P1110  
GUAACCAGGAAUAAAUAUAAACCCCCCCCCCUUUUUUUU  
>P1111  
AUCGGAUCCUCCAGCCCUAUACGGAAGGGCACAACCCUU  
>P1112  
UUUAAUUUGGUAGGAUUUUGACUGGUUUUGCAACAACAGGU  
>P1113  
UGAGACUAAAAGGAAUGUGACAGGGAGAAAGGAAUUUUGA  
>P1114  
AAAUUAGAGCCUAUAUAGUUUUUCCCUAGGUGAAACUGCA  
>P1115  
UAUUGUAAGAUAGAGUUGAGACCUGAUAGGUGCUCUCCCC  
>P1116  
GGACGUGGUGGGGACCUUAAACUUAGGGGAAGGAACCGUAG  
>P1117  
GGUCUUUCGGGGGCUCCGUAACUUUCUAUCCGUCCGCGUCA  
>P1118  
AAAUUUACGUGAUGAGCUCUACAAGGCCAAAAUUUUUUUU  
>P1119  
UAGACGACAUCCCUAUUCGUACCUGGUUCCCCAAGGAAAAU  
>P1120  
CCAUCGCUCUUCUACUAUGAACCCCCUCCCCAUACCCAAC  
>P1121  
ACCAAUAAACUAAUAGCCC AUGGUUCCGACCAUAAAGUAC  
>P1122

AAAGAAAGUUCAAUUUUGGGAGUUAAAAGUGUAAUAAGGUA  
>P1123  
GAAUAAAACAAACGCCAAAAACAAAAAAGCCAAGAAACAA  
>P1124  
CGGCCUGUCUCCACAGCUGUAUGUAAGAAAGGGCAGUCGGG  
>P1125  
GGGUGGUCGCUCUGCAGAGAACCCCCUUCAGGAUCCGUGA  
>P1126  
AAGUCUGGGGGAAGAUUCAGACUUUAUUUUUGUGUUGACAG  
>P1127  
ACGCCGCCUUAAGAGCUGUAACACUCACCGCGAAAGUCUGC  
>P1128  
UUAUGUAAUUUAGAGGUAUACGCGCAGUUAGCCACUCCUU  
>P1129  
UCUUUGUGAAAAGACUGGCAUCCCCAUGAUAGGAAUCCC  
>P1130  
UCUGGAAAUGCAGAUAAAGCAACACGGGAAAUCUCAUU

## II. Negative subset $\mathbb{S}_{\xi=20}^-(m^6A)$

>N1  
CUGUGACCUUACAGCUGAGAACUGUAACACAAGAGUGGAGC  
>N2  
CACGUCCAUCUGAUGGCAGAACUGCUGGAAUUUUUGAGAUG  
>N3  
GCACUUUGGCAGCACAGAGACUAGUGUGACAUUGUAGUGG  
>N4  
GAAUGAAGACCUGCACAGAGACUGCCACAGUGUCACUCACA  
>N5  
UAUUAUAAAAGUCUUAAAAACUUGAUGAGAUGUCUAUUUC  
>N6  
UGGCAAACACCUCAAGAUGGACUUGAUGUCUCUCCCCCUUG  
>N7  
UCAUUCUCCUGGCCUGUAGACUUCACUCCUGUCUCUUACC  
>N8  
AAUAUCAUUUUGUAGAUAAAGACUCUUACGCAUGCCUGAAAG  
>N9  
UCCAGAAAACCUUUCAGGAACUAAAAUGAUUUGUUUUAGU  
>N10  
CUUCGGUUUCUUUCCCCGAGACUUGAAUUUCUUCUCAUACA  
>N11  
AUAUCUCUCAUCAAAUGGACUCAGUUCCCCAGUAAAUG  
>N12  
UGGAGCUGGGUCUUUGAGAAACUCAAUAAGAUACAUGAACC  
>N13  
CUAAACAGGGAAACAAUGAAACUAACAGAAGUUAUGAAACA  
>N14  
GUCCUUAUCACUUUCCAGGACUGCUUAAUAUUAUAUCUGA

>N15  
AUAAAACCAGAGACACUGAAACUUAUAGAGGAGAAAGUUGG  
>N16  
UUCAAACUUUUCUUUGCGAGACUUAACCAGAGAACAAAGUC  
>N17  
GAGAGGGAGGCAGAAAACAGACUAAAAGAUGGAUAAGCAGG  
>N18  
CAUCCGUGAAGGAAGUCAGGACUGGAACUCAAGCAGGUCAG  
>N19  
CUAAUGGAUCCAUUGAACAAACUACAGUUUCUAUCUUGUGA  
>N20  
CAACUUUGGUGGGCUUUGAAACUCUCCUCCCAGCUGCCAGU  
>N21  
AUGUAAGAACUGGCAGGGAAACUUUGUAUCGUGAAAGUGAU  
>N22  
ACAUUAUGAACUAACUAUGAACUCCCUUCCCCGGAGUUCAUG  
>N23  
GAAUGGCUAGCAUUUUCAAACUAACCUGAUGGAUACAAAU  
>N24  
CUUUUUGAGCACAUGCAAAAACUUGAACCAAGCAUUCUGGA  
>N25  
UUUUUAUAGGAGUUAUGGGACUCUUUAGGUCAUUUUUCA  
>N26  
GCCAUACAAAGCAAAAACAGACUUAUCUGGACAUAUUCAUC  
>N27  
GUCCCAUGUGGGUGGAAAAAACUACCCAUCUGGUUCCCAGU  
>N28  
UUUAAUAUUGAUUUUAGGAAACUAUUUUUGGAGAUAGGAAG  
>N29  
GGUAACCCAAUAACAUAGGAACUUAUACAAUAUGAACUCAC  
>N30  
UCUGCCUCCUAGUGAUGGGACUAAAGGUGUGCACCACCAU  
>N31  
CUGCCUAGGGAAGUUUUGGGACUUCACCUCCUUGCCUCCU  
>N32  
CAAUAUACUCUGGGAAAGGGACUGAUCACUCACUGCAUCUU  
>N33  
AUUAUUCUUUUUAUUGGGGAACUGAGUCCAUAUGAUUGAG  
>N34  
ACAUUUGCAAACUGUGCUAGACUAUAAUUUGGCUCAUUCAA  
>N35  
AUUAUUUAUCCAGAAACUAGACUAAUAAAGAGUAAGAGUUA  
>N36  
UGUCAUUCUAGAGCCUGAGACUUUGGUGUUCGGUUCAGGA  
>N37  
UCAAUGCAAUACCCAUCAAAACUCCAACUCAAUUCUCAA  
>N38  
UCAUACAAGAAGCCUACAGAACUCCAAAUAAGACUGGACCAG

>N39  
AUAGAUAAACCCUUAGCUAGACUCACUAAAGGGCACAGGGA  
>N40  
CUUUAGUUGGGAGGGUUCGAAACUCUUGGGUGAGGAGUUCAG  
>N41  
CGAAACUGCGAUCGCACCAAACUUAGAAACAGAACACAGAC  
>N42  
CUAAAGGUUCUUAUUAUGAAACUGUUAUGUAGGGUUGGUUC  
>N43  
UUGAGUUAUUUUUAUAUCAAAACUACUUCACUGAGACUGUUU  
>N44  
UAGACAGUGACAUCUUGGGGACUCUUAUGGAAGAAUAAGAA  
>N45  
UCAUGCAGUCAGAAAUCAGACUUCAGGCCUUCAGAGCCA  
>N46  
CAAUACUAGUUGGUAAAAGGAACUAUAGACUGUCAAAAACAG  
>N47  
GUUAUCCAGGGAGUGACUGAACUGCCCUCAGUCUCCUCGA  
>N48  
GGAGGAGUGGGGAUGGCAAAACUGUCCCCCCCCCUUGG  
>N49  
UUGUUGAAAUUGCAGAGAGACUGCACUCCGUAAUUCUGAA  
>N50  
AGAUGCCCAGUGUAGGGGAACUGAGAGUGGGGAGGUAGAA  
>N51  
GAUUUAGAGGCGGGAAGAGAACUGGAAAAGGAUUAACAUU  
>N52  
GAGGUAAGACCUUUGGGAGGACUUGUGAUGUUUGAAAAGAG  
>N53  
CUAAGUGCCUCGAAAAGAAACUAGAGAGAGCAAACACUAG  
>N54  
AAGUGGAUUAUAGCCAGAAACUUAGAAUACCCAAGAUUA  
>N55  
GUUCUUUUUUGGUUGGGAGACUAUUAUGACUGCUUCUAU  
>N56  
GGUGUGUUGGGGUGCCUGGACUGGGUGAAGUGGGAGUGAU  
>N57  
GGCGAGACGCCAGUAAGAAAACUGCUGCUUCUAAUGCUCAG  
>N58  
CAUUAUGCAGAAUUUGGAAAACUAAAAUAUAUCAUGUUUG  
>N59  
AUUUUCUGAGGAACCGCUAGACUGAUUUCAGAGUGGUUGU  
>N60  
CCCUGCGCUCUCCUGUGCAAACUGGUCUCUUUGGGACCUGG  
>N61  
AAUAAAAUUUAGUACAAAAACUAAACAACAUUUUAAAAA  
>N62  
UGUAGUACUAAUCAAAAGGAACUAAAGAAUUAAGGAUGUGA



>N63  
UGUGGUUGCUGUGAAUAGGGACUUACUUCUUGAAAAUAGGC  
>N64  
ACACAUGGUUUUUUUUGGAAACUGAACUGACACCUUGUUGG  
>N65  
AAUUUGAAAAGAGUUUGUGAACUUAGUAAGACUUUAAAAUG  
>N66  
UAGUUGGAACAAUAAUAUGAACUAAUAAGUACCCCCAGAGC  
>N67  
CAGAGUCUAUAACCUACUAGACUGAUACGUAAGUUAGGCAU  
>N68  
CAGGAAAAAGUCCAUGAAAACUGAAAUCACCCUUACAGUA  
>N69  
UGAAGUCACAACAUAUCCAAACUUAUGAGACACAAUGUAAG  
>N70  
GGUUCCUAGAUCUCCUCCAAGACUAGUCUGCACAGGUGAGAG  
>N71  
AGCAUUUUCAGAAGCUAGGGACUCAAGAGGAUGGCAUUUCC  
>N72  
GGUACCUAAAGGGCUGGAGGACUUUUCACUAAACUCUCCU  
>N73  
AUUUCAGGCUCCAAGGAGGGACUUUAUGGCUUACUAAGAUC  
>N74  
ACCCCUUCAGCAAUUGGGAACUUUCUCUAAUCCUCCAUI  
>N75  
GUUUGGAGCAGAGACUGAAAACUGCCCCACCUGGGAAUCCA  
>N76  
UGAAGGUUACUUUCUUGUAGACUUUAUCUUAAGCAGUAAA  
>N77  
GUCCCCAGGUUGGCUUGGAGACUUUGUAGCCUGAGGAGCAC  
>N78  
AGCUUUUAAUGUGGACAUGAACUACAUAUUUGACAGUGCU  
>N79  
UACACCCAGAGCUCCUUGGAAACUAUACCACCAAUCAAAC  
>N80  
CUCAAUGGACAGCAGCCAAGACUAGCGCUUCUACCACCCCU  
>N81  
AGAGAUCUGGGAGGUAAGAGACUCUCAGGACUCAGGGGAAG  
>N82  
CCAAGGAAAAGGAGGUUCAACUUGGGAUCUAGCUCAAGGG  
>N83  
UAUCUUUUAAAGAUAAAGAUAGACUAUAUUUUUCAUGUGUUUA  
>N84  
AAUCAUUUUCUCCUUUUUAAACUUUUCACUUUUUAAAAAU  
>N85  
CUAAGAACCCUGGUGUUGAACUUAACCAUAGAUUAACAUI  
>N86  
GUUGUCCCUGCAUGGCGGAGACUAAGAUUUUUUAUCUCCUCA

>N87  
CUGGAUGGUAGUCCUUUAGACUCUACUCCGAACUUUGUCU  
>N88  
GAAUCUUCUGGUCUCGUGGGACUGUCUGCCGAGUUCUUUCC  
>N89  
CACCAUGCCUAAGUAGUUGGACUGAAAUCAGAUAAAAUAAA  
>N90  
AAAAAAACAAAGAAAGAAGGACUGUUUGAUGGCUAGUAGUU  
>N91  
UUGUUCUCUAUCCUGAGAAAACUCUACUUAUCACCUGCCUC  
>N92  
UCUGUUUCAGUCUCUGUAGAACUAUCUCAGAAAACUGAUGU  
>N93  
UUAACUCUUGAGGUCAAGGACUUGUUUCUUUUUCUUCUGU  
>N94  
GCCUGACUGAGGAAGAGGAACUCUUAUUAAAAUUUGAUAU  
>N95  
UUUAUUUAUUAUUUUUGUAAACUCGGUGUGUAAAUCACUCU  
>N96  
AUGGGGGCCGAAUUCAUUGGACUCCCAGUAGAAGCUCUGGG  
>N97  
CUGAUUUGACAGUUGGUUAGACUGUGGAGACUCCAAGGGG  
>N98  
AGGCCAAGGAGUUCUAUUAAACUUCAUCAAGAAUUGGUCAG  
>N99  
UACAUAAUACCCCCACCAAAACUCAAGGCUUCUAAAAUAAA  
>N100  
CUAGAGAAAGUACCCAUGGACUGAAGGGGUCUUUAACCCU  
>N101  
UUGUGCAAUAAGAGUGCAGACUACAGAAGCUACACAGCUU  
>N102  
GGUAGAGGACAUCAAGAAGGACUUAUUAAACUCACUUAAG  
>N103  
ACAGAGCAAUUGUGAUAAAAACUGCAUGGUACUGGUUAUAGA  
>N104  
AGAAUCUAACAGAAAACAAGACUGGCUCACCAUCAUCAGAAC  
>N105  
AGAGUACUCUGACCACUGAAACUAAGGAUAGAGCUAGUCUC  
>N106  
CAAUAGUGAUGUUUUUAGGACUUCUUCUUUAUAAUAGU  
>N107  
ACACCCUGCACACCACCAGGACUCCUUAUUCUCUGGGGCCU  
>N108  
AGACUUAGGUCACCAUGAGAACUCAGAAAGCUCUCACAAAU  
>N109  
AGCUGCCUACGGCAUGUGAACUGGGUUCUCCUGAAAGGUG  
>N110  
AAUCCAUAACUCCAGGGUGGACUACUAAGCCUGCAAGGUG

>N111  
UUAAAACAU AUGUGUUUGAGACUAGCAAAAAAUGGGUAAAG  
>N112  
CCCCCCUUUAUAAGCGCAGACUUUUUAUUAACGUUUUAGC  
>N113  
UUUCCAUGUAUACAGCUUGGACUUUUCUGAACACCUUUCUA  
>N114  
GUGUGUGUGGAUAAAAUCAAAACUCGAGUUGUAUACAUAUAAA  
>N115  
AAUAAAGAAAGAAAUUAAAGACUUUUUAGAGUUUAAUGAAA  
>N116  
GGGACAAAAGUAAAGCAGAGACUAAAGAAAAGGCCACCCAG  
>N117  
CAUACACAUAGAGUAGAGGACUUC CAGGUCUGUGUUCAUU  
>N118  
ACGCUGACACCAUUGCAUAAAACUAGCAAGAUUUUGCUAAAA  
>N119  
CCUAAAAAUUCCACCAGAGAACUCCUAAACCCAUAUAGCUUC  
>N120  
CUACUUGUCAUAGCAUGCAAACUCUAUUAUCUUGAUUUUUU  
>N121  
GAACUUUUAAUAUGCCAGGAACUGCCUCUCUUAUCACAUAA  
>N122  
GGUAAAAUCCUCCAAGAGGAACUCUCAAUUCUGAAUAUCUA  
>N123  
GGGUGGGUGGAUAUGGGGGACUUUUGGUUAUAGCAUUGGAA  
>N124  
AAGAAAAUGCUUCAUUCAAACUUCUGUUAGGAGUUGGUUG  
>N125  
AGCCAUGGACUGUACCAAGGACUCUUGCCUGAGUGAGAACC  
>N126  
GUAAUCCAUAUAUAAACAAACUCAAGACAAAAACCACAU  
>N127  
GCUCAUGGGGGCUCACAAAGACUGAACUUGCAUGGGACUGA  
>N128  
UGUUAUGAAAGAUGUUAUAAAACUGCAUAUUCUCUAAACAUU  
>N129  
GGUGUCUAGCGCCCCAGAGGACUCUCCAUGCCGCAGGACCC  
>N130  
UGGGCUGGAGUUGUUCUUGAACUGGAGGAUGCCGGGGAGAG  
>N131  
GCUCUUGUGUUUAUUGUAAGACUGGACAACCUCAUCCCAGG  
>N132  
CAUGUAUAGGGGUGACUAAAACUAGGCUCCACAUAAAGUAGG  
>N133  
ACAAAAAAAACUUA AAACAAACUUGAUAGGCCCAUAUAUG  
>N134  
UGGAAAGAGAGGCCCAUUGGACUUGCAAACUGUAUAUGCCC

>N135  
AUAGACCAGACUGGCCUCAAAACUCAGAAAUUCCCCUUGCCU  
>N136  
AAUAAUGGACCCUCAGUGAAAACUUUUAGAUAUCCUGUUGUU  
>N137  
UACAUUCAGAUUCCACACAAAACUCUCCUGCAUGUGUGUCUG  
>N138  
UUUGGCUAAUGGUUAAACUAGACUUCAAAUUCAGAACCAGUG  
>N139  
AGGCUGACCUACGAGAUAAAGACUUAAGACCAUUGGGUGACUU  
>N140  
GUCUUCUCAAGGAUAAAAGAACUUCUGGCGGAAUCACCAUG  
>N141  
CACGUGUUCUUGUGAUGAAGACUGAAUGUAGGCUGACAAGG  
>N142  
UCCACCUACAGAGUUGCAGACUCAUUCAGCUCUUCGAACU  
>N143  
CAGGUUUGCAGAAAUGAAGAACUACUCUGGAAAAUUUAAA  
>N144  
UUUCUCUACACAAAGGAUAAAACUGACUGAGAAUGAAAUUA  
>N145  
CAUCCACAUUCAUAAAAGAAAACUUUACUAAAGCUCAAAGCA  
>N146  
UCCCUUCCGCUCGACUCGAGACUCGAGCCCCGGGCUACCUU  
>N147  
CCAAUCGCGCAGAACUUGAGACUGCAGUACAUAGGGAAGCA  
>N148  
AUAUUGCCUCACCCUGAGGGACUGGAAUAAUUAUACUCGGG  
>N149  
GGAGCCAUCUUGGAUCUGGGACUCAGUGGAAAGUUGUCUGC  
>N150  
ACUUUCCUUAAGCUCUAAAAACUUCUACAUCCAUUUAUACA  
>N151  
AUGAAGAGAGUCUAUCAGAAAACUAUUGGUGAAGCUUUGUUG  
>N152  
CACUGUGAAAAUUAACAAAACUUAAGCAGUUCACUGAAUU  
>N153  
UGAUUAUCCCUAGGCAGUGAACUUUGGGUAUGACAGAAUUA  
>N154  
AUGUAGCUGUCUCUUGUGAGACUAUGCCGGGGCCUAGCAA  
>N155  
GUCUGGUGGUUCCUCAGAAAACUGGAUUAAGUACUACCGGA  
>N156  
UCCUCAGUUUCAUGUGUUGGACUUCAUCAGAGUUCAGGGCA  
>N157  
CAUCUAGCUCACUCUUUGAGACUUCUUAAGAGUUAUCACUA  
>N158  
AGAGAAAAAAAUUAAAUGAACUGGCAAACAAAACUGUACU

>N159  
AGAAAAAGUGAAACACAAAGACUCUGCUUUUCUUAGCAGCA  
>N160  
UUAUUAGGACUGCUCUUAGAACUGUUGUUUAGAACUUACAC  
>N161  
ACAACGCGGGGAUGGAUGGAACUUCAUGGGAAGAUAAAGUA  
>N162  
UGGAUUGUAUAUAUGCUUAAACUUAACCUUUGGCCUAGAA  
>N163  
CCUAUCCCCUCCUCCCUCAAACUACUCACUAAACCACACAC  
>N164  
AAUUGGCGAACCAACGCGGGACUGAAAAACGGCAAAGGAUU  
>N165  
CUGACUGCUGAAAGUUCUGAACUCGGUGGGGGAGUCGGUUC  
>N166  
ACAAUAGUGGACACCCAAGAACUCAUGAUAGACCAAGCUUG  
>N167  
AAAAGGCUAUACUCAACAAAACUGGAAAACCUGGACGAAAU  
>N168  
GGAAGAGGGGCCUUUUAUGAACUACAUCAUGAUGAUUCCC  
>N169  
AGAGGAAAAGGUCAAGAAAGACUUAUGGCCAGAGAUGAGAG  
>N170  
GUAUUACAGGCAACACCCAAACUACAGCACUACUAUUUCAU  
>N171  
UCCAAUUUUGUGGAGUACAGACUUUUGAAAGAUGACCUAGU  
>N172  
AUUUUGACCAAGGAGCUAAAACUAUCCAGAAGAAAAAAGA  
>N173  
GAAAAAUAAUUGGUUAAAACUUUAUCUGCUGGCUGUCCA  
>N174  
AUGCACCUAAUCUUAAGAGACUGAAGGCCCAUAUAGUUU  
>N175  
GAUAUCUAAUUAUUGGAGAACUGUACCCACAUCUAGUAUA  
>N176  
UAAAGAAGUCAAGAUGGUAGACUCCAAAAAUCAAAUAACC  
>N177  
UUUCUAGCGGCACCUGGUGAACUACAGAAGAGUUACUCUUC  
>N178  
CCACUUUGGAAAGCCCAGGACUCUCAGUGCAGUGGUUCUC  
>N179  
ACAGUCCCCUAGUAAUGAACUUUCGCAGUCAUCACUCUU  
>N180  
ACAAAGCAAAGCAGGCAGGGACUGCACCAAUCCCAGACUGC  
>N181  
AAGGAAAACAUUAAUUGGGACUGGCUUACAGUUUCAGAGG  
>N182  
AGGUGGUCCUUGGUAGUCAGACUCAGGAGGAGGAAGUGGCC

>N183  
AUAUCAGGAACAAGGAAAGAACUUCCCACCCCACCCCACU  
>N184  
GGUCCCAAGUUUAAGCCUGAACUGAAACGAAGGUGAUGGUG  
>N185  
UGCAACAAGGUACCUGACAAACUCAACUCAAGGAAGGAAGU  
>N186  
GCCACCAAGUAAACAGUUGGACUGUUUUUGAAGUUAAUUGU  
>N187  
ACUUACAUAUUUUCAAAGACUGCUGGGUGUCUAACAAAC  
>N188  
GAGUUAGCGGUUCUCAGCAAACUCAUAGCCAGUCACCAAUA  
>N189  
CACAAACCAGGAGCGGCAGGACUCGGAGAGGCCUGGGGAAG  
>N190  
ACCUAUUUCUCA AUGUUUGGACUCCUGGCCACCAGGCCCC  
>N191  
ACGCUACGGAGUAUGCAUGGACUGUGUAGAUAGUCACAGC  
>N192  
UUGCAGGGGUGCUAGUUUAGACUCACUGGGUAAGGGAACCA  
>N193  
AGGGGAGUUUGGAUGGAGAAACUAGGGGGUGGUGCCAUCCC  
>N194  
CGAAAUCUAAAACAAAACAGACUUUUUAUGGGGAGGGGGA  
>N195  
GUCAUGGGUCCCUCCAUUGGACUCUUUGGUUGGUGGUCCAG  
>N196  
ACUCACUAGCAAACUGAGGGACUGUAGGUAGGGCCAGUACA  
>N197  
AGAGUCAUGGAGCCCAGAGGACUCGGAGACCAGAUUCUUUC  
>N198  
AUAUCACCAAGGCAUGGCAGACUGACCUGCAUGCCUCCUGU  
>N199  
GAGAGAGUAGCAGACAAAAGACUCCUGUGAAGUUGAACACU  
>N200  
AUGAGAAAUAAGCUCGUGAACUCUCUACCCCUAGGAAGCU  
>N201  
GACCUCAAGCUGUUCUAUAGACUAAUGGUGAUAAAACUGC  
>N202  
ACCAAUAACCCCAUUAAAAACUGGGGCUCAGAGCUAAACA  
>N203  
AGAGGCAGGGGAUGGGUAAACUACAGAAACUGACUGCGGU  
>N204  
UUACCAGUGUCUGAUGGUGAACUCAACAUGUGGCCAGAUGG  
>N205  
GUCAAAGCUAAUGCAUUGAACUUCCCCCCAUUAUUCUUA  
>N206  
UGUUGUCCCACGUUCCAGAACUCCAGGGAAAAAGGCAGAG

>N207  
AUAGGAGUCAGGGGCAGGAGACUCACCACAGGCCUUUAGGCC  
>N208  
AGGAGUCAAGCUACUUGGGAACUUUGCAGUAUACAUGGUUA  
>N209  
GGGCUCUCCUUGUUAUUUAGACUUUUUUUGGGCAAUGUGGA  
>N210  
UUGGUCAGGGUGUCCAAGGGACUCCCAAUCAUUUUAAGCU  
>N211  
AACCUCAGCUUCUGAGAGGGACUCUCAGCUUUUUUUGUUUG  
>N212  
ACUUCUUCAUUGCUGGUGGAACUGCAAGCUGGCACAACCAC  
>N213  
AAGCAGGCUUAGUAUAUGGGACUGCCUCUAAGACAGGACUA  
>N214  
UGUAAUACACAAAAGUUAGAACUUAGGUUUAGCAAAGGCUA  
>N215  
GUCAUAAUUUUUUUCUAAAAACUGUAAACAUAGGAAUUUUU  
>N216  
AUGAAAGAUAUUGCAAGUAGACUUGGGGCAGAUGCAGAUGG  
>N217  
CAUGCAUAAGUGACCCCAAACUUCUUCAGAGAACUCUUA  
>N218  
UUCAUGGUUAUAUAAAAGAAACUGUAAGGUAGAAAUUUCA  
>N219  
CAGCCCCAGUUUAAGAAAAACUUCAAGUUGUGGAUUCUGA  
>N220  
UGGAGUCCAUAAGGGUUGGACUGCAUACAGCACCCAGCA  
>N221  
ACCCCCUCCAAAAAAGAGAACUUCAGACCAAUUUCUGUUA  
>N222  
AUUUGAGGCAAUCUACAAAAACUUUCCUUUAAUUGUAAUUA  
>N223  
CCCUGCACUGGGGAGAGGGAAACUUGUAGUGCCCACGUCCAA  
>N224  
AAAGAGGCAAGGAUAAAGGAACUGAGUGACACAUUUGAAGG  
>N225  
GAAAAUAAAAAUCUGAGAAGACUAGGGAAAAUUGUUGUAC  
>N226  
UUUUGUAUUUUCGGACUCAAAACUUUCUAUAAUAAUUUAAA  
>N227  
UGAUAAUUUAAAGCUGUUGAACUGUGAGUUUCUGUAUGUGU  
>N228  
GAAGUAAUUUAUGAGAUAGAACUAGGGGAAAUACAUGCAUC  
>N229  
AUUUUCUGUAAUAAACCAGACUAUCAUCUAACAUGAACAU  
>N230  
AUGUCAGUGGGAGGAGAGAAACUUGGACCUGAGGGUGUUUG

>N231  
UAACUAAGACAAGCCAAUGGACUUUCUCUACACAAAGGAUA  
>N232  
GGUCCGUGUGUGUUAAAUAGACUAGUCACCUUUUUAUAGAAC  
>N233  
CAAUAACAAUGAAGAGGAAACUUCAGAUUUUUAAGAGAGU  
>N234  
GUUUUCCCCACUUAUCUGAACUAAAAAAAAAAAAAAAAAAAA  
>N235  
UGCCUUUUGCCACCUGGUAAACUCUGGAGUCAGUCGUUAUA  
>N236  
UAUAUGAUAGUUUACUUAACUGAAGUGUCCGCACCCAAA  
>N237  
AUUGCUGGUUGGGAGGGCAAACUAGUACAGGUUCUUUGGAA  
>N238  
AUAAGAGAGGUUGCCAUGGAACUAGAAGAGAAGCCAGAACG  
>N239  
UUGUUUUUGUAGCUUACUGGACUUGAUUACUUUAAAAUAAC  
>N240  
CAACAAGAGUCAUAAAAUAGACUCCUGGACAGCCAAGGUGU  
>N241  
AGGAGUGAUUUCUACCAGGACUGUGGGGUUACUUUGGUUU  
>N242  
UGCGGUACAUAGGGAAGCAGACUACCCGGGCCUGACCUGGG  
>N243  
GGAGGGGAUAGGGAGUAGGAACUUUUCAGAGGGGAAACCAG  
>N244  
UUUAUAUUAAGCCCCAAAACUUGGAAACUUCUAUAGGAU  
>N245  
CUCCAUGCCUCUCACCAGAGACUAUGAAAGCCAGAGAUCCU  
>N246  
GCCCAGAGUUUACUAAGAGACUGUGCUUAUAAAGGGGGAA  
>N247  
GCACAAAACCCCUUAAUGAACUACAGGAAAACACAACCAA  
>N248  
UCACAAAGCUGUUUAGCUAAACUCACUGCUAUAGAAGUAUG  
>N249  
UGGGGGAGGGGUGCGAAGGAACUGUGGCCAGCCGCUAUUUC  
>N250  
CAAUGAGCCAACGUCAUUAACUGGAAUAAACAAAUCCA  
>N251  
UUUUUUUUUGACUUUCAAGACUGAGUUUCUCUGUGUAGCC  
>N252  
AUCCCAGCAACAGAAAGCAAACUAACCCAGGUAGUAUGGAA  
>N253  
AGGGCAAUGGCUGUAAAAAACUUCUGAGAGUUACCAACAA  
>N254  
GAAGAAAGUUGGGGAGUAGGACUAUAGUUUUAUUAUUUUUA



>N255  
GUAUAAUAUGUGGGGGUUGGACUCCCCUGAUAAAGGUCAGGC  
>N256  
UUUACUAGCCUGUAUUUUAAAACUAUACGAGCAUUUCCCAGC  
>N257  
UGCUCAUCAGUGGUUUCUGAACUAAAGCCGCCUUUAUCAAG  
>N258  
CAGGAAAUUCACCAGGCUGGACUGGUGAGCAGAAUAAGUAG  
>N259  
GCUGGUAACACAGGCAUCAAAACUCUGAGUCACCCCCAGG  
>N260  
AGGGUGAAAUUUUACAGGAACUGAAUUUUACAGCACCAU  
>N261  
CUCCUCCUAUGCUUAAGAAAACUCACCCCCUGUUGUGCUU  
>N262  
UUUUUGUUGGGUCAUAAAAAACUGAAAGUACUUUUUUUUUA  
>N263  
CUAAGCCUAGAUUCUAAAAACUAGGUUAGCAGUUUGGACG  
>N264  
AACUACCUAGUGAGGAUUAGACUUUCAAAAUGGAAGAUUUU  
>N265  
ACCCGCCAAGCGAUCUUAAGACUUCUGGUGAGUGGAACACA  
>N266  
AAUUGUUCUGUCUAAAAGAACUGCAGGGACAAUAAUGGAG  
>N267  
GAGAGCUGACCCAGCCCAGACUGGCUGCAAUACUCACUAG  
>N268  
CACCACAGAAGGGUUUUGAGACUAUUUGGAGAAAGUGAUAG  
>N269  
UCUCCGGUGCUUAAGACCAGACUGGUGUAAAGUGUAGAUGG  
>N270  
AAUGGGCAUAGAAAAAGGAAACUUUGCUUUCUGACUGCCCU  
>N271  
UGGGGAUUUAUUGUAAAAGACUCCUUAAGCAAAGUAUC  
>N272  
GGGAUUUUUGGAGAGAGGAAACUGAAACUAGGAAAGGGGAU  
>N273  
UUGCCUGGGAAUGUUAUGAAACUUUAGGAUGGAAAGGCUUG  
>N274  
GGUCUCCAUGUCUACAUUAGACUCCCUGGAGGUUUCAUCAG  
>N275  
AUAUCAGUAACUAUAGCUGAACUGAGUGCAUGCAAGAUGCA  
>N276  
CAAAAUCAAUGUGGGUAGGACUGUUAUUUUUUUCAAGGAA  
>N277  
AAAAACUUGCCUACAUAAGACUGGUUUCUGGUAAAAAGGA  
>N278  
GUGAUUAACAUUUUGGAGGGACUAUCCAUCUGUGUAGCUAG

>N279  
CGAGCGAGCAUGCCUCAAAAACUAAGUUUUAAAAUCGAAGG  
>N280  
AUACCCAACCUCACCUAUGAACUAUAUCAGCUUAAAGGUUU  
>N281  
GCUCCCCCUCUGCAGUAUAGACUGUGCUUCCCCAGGGGCAG  
>N282  
GCAACUGGGCACGAGGUGGGACUCAAAACCCACGAUCUCGCA  
>N283  
GCUGAAAGGCUAGACGGUGAACUAGAUGUCCUUCUCAGGAU  
>N284  
GCAAUCUCUUCUUCUGGGACUCGGGAAGCUAGGUGGAUA  
>N285  
UACAAAUCAGGGGCCGGGAACUAGCUUAGUCAGCAGAAUC  
>N286  
UUAUGUUCAACCGUAUCCAAACUAUUUUUUAUUGUAGAAGC  
>N287  
GCUUGCCCCACCCUCCAGGACUAGAGGAAUGGGGUCUGCU  
>N288  
CGCCUUCGCGCCGAGGAAGAACUGAGGAAGAUCGCGGGUU  
>N289  
GACUCACAGCAGAAGGCUAAACUCUUAUUGCGGCAAGCCCU  
>N290  
UAUCAGCUUGAAAGGGGAAGACUCCAAACUAGUGUGUACC  
>N291  
CACAGGCACAUGCAGCCAAAACUCCAAACAGGAAAAAGAAG  
>N292  
AAGCUACCGUCUGUGUUUGAACUUGUAUCUCUGAAGCCAUU  
>N293  
AGAUGCAUGAGCUUCACUAGACUAAAGAAAAACUGAUUUA  
>N294  
AUUAUUUAUUUAUUUAUUGAACUAAAAGAAAUGGUGAUUCA  
>N295  
AUUACUCAGGGUUCUUUAGAACUGUGAUUCCCAACCCUCCU  
>N296  
AGUGGUGAGGUCAAAGGGGACUCAGAGCUUCCCUUCUGCA  
>N297  
CUGUGGCAAACUCCCCCAAACUGAAAAUAAAUGAUCCCA  
>N298  
CACCUUUUAUUGUUC CAGAACUGGUCAGAAUGGUGCCUCC  
>N299  
GUUCUUCAGGUGCAAUGUGAACUGGUUUUAAAGCAGGAUUG  
>N300  
CCUACUGUCUCUACUCUUAACUAGGUUUUAUAAUGGGAGUC  
>N301  
AGGAGUUUUGUUUGUAAUGAACUUUAUUUUUCCAGACUC  
>N302  
CCAUCUCUUUAAAAUCCAAACUCUUUUUACAAUAAAAGU

>N303  
GUUGGCCUGGGGAAACAUAACUUGUUUGAUUAUACAGACA  
>N304  
AUAUCUGGUGUUCGAACCAGACUCCUGGCAGAAGUUGUGUU  
>N305  
CUUGUUAUAUAAACACCUGGACUCAGGGCUGGGGGUGUAGU  
>N306  
AUGGGGCACAGGACAUGUGGACUCCUGUCCUCCUUGAGUU  
>N307  
GGACUCAAUUAGACUAACAGACUGGAUUCAAUUCGUAGACU  
>N308  
AAAGUUUUUCCUCCUGAAACUCAGCGAAGAGUUCAAGAA  
>N309  
UGUAAAUUGUGUAUUUAUGGACUUAGGGCUCUGCUCCACU  
>N310  
AUUUGAAGGGAAAAGAGAGAACUGUCCUUGCAAGGAGGACU  
>N311  
UUUCCUCUUGAAGGAAGAAACUGUUUUAGUGGAGCCCACA  
>N312  
AAGUUUCAAAACUAGAGUCGACUGGGGCAGGGGCGGGGGA  
>N313  
CUGAGAGAGGGUGGAUUUGAACUAGGCAUUCUUGGAGUUUC  
>N314  
AAAACAAAAAACACCUAGACUGUGAACACGUGCCACUCG  
>N315  
UAUACCUUUGGAAUAUUAAGACUGGGUGUGGUUGCACACAC  
>N316  
CUGGGAAGAGAUUUUGACAGACUACCUCGCAGGAGAGUAAA  
>N317  
GCCCGCUGCCUCACUCUCAAACUGCCAUGAUUUUCCACAG  
>N318  
UUACAUGACCGUGAUGGUGGACUUCCCCAAAAUGGAAUUC  
>N319  
CAACAUCUCAAUUUUUAGAACUCAAGAAGCUGAGGCAGGA  
>N320  
UCAGAGCCCACCUACACAAGACUUAUCAACCGUCCUUGUGG  
>N321  
UUUGUUUGUUUGUUUAAUGAACUGCUGCAGCCAUGUUGUGU  
>N322  
AUUAACAUAACAAAUCCAAAACUAAUUUUUUUUUCCUUUU  
>N323  
CAGUGAAACAAUGUUUGAGAACUGCCUUUGUGUGCCUGU  
>N324  
AAGACUGGAAGGUGCUCUGAACUUAAGAGAGGGAAGAAUUG  
>N325  
UUUCUAUCCUAUUUUUAGGACUCUUAAAAAAAAACUAUUU  
>N326  
GCCAGCACUGUACCAACCAAACUACACCCCCAGCCUUUGUU

>N327  
UGCCCAAGAAUUGAUACCAAACUUUAGGGUGUACAUUUCCU  
>N328  
ACCCACCCCAAACGACGAAACUAGAAAUAAUUCUAGAA  
>N329  
CAUUCCUCAUCCAGAAAAAACUGAGAAUACACUCCUUAA  
>N330  
AUGGCUGGGUAUACCCUAGAACUCUGAAAAUAGUUGUGUGU  
>N331  
GGGAAAGCUUCUCCUUAUAGACUCUAAAGUGUGUAUGAGUG  
>N332  
AAGAGCAAGAAUGGGGUAGACUUAGGCCCCUGUAUAUCU  
>N333  
GGCUGCAUUGAUGGACAGGGACUUGGAGCUAAUAAAUCCC  
>N334  
AACCAAGAAAACAAAUAAAACUACAUCCCCCUUCACUCA  
>N335  
CAGUUCCACUGGGACCCAGACUGUGCUUCCCACCACACA  
>N336  
UUAGUUCUUGGACAGCUAAGACUAUUAUACAGAGAAACCU  
>N337  
GGAUGUAAAGUAAAUUAAAAACUAAAUCGGAUAGAAUAGA  
>N338  
CUCCGGUAGCGCGAAAUCAACUUGCCAGAGGCGGCUCGCA  
>N339  
UAAUUAUUCAGUAGAAGUAGACUUGCCUAUGGGGCCUUAGA  
>N340  
AUGC UAAUCCAAGCUACAAACUGAACAAACACACGGGUCA  
>N341  
GAAAUACAAGAAGCAUCGAACUAGCAACUCCAGGGUUUUG  
>N342  
GGGAGGCCCCUUUAGAAGAACUAAAAGUUAUUUGGGUUGC  
>N343  
AAGUAAAUUCCGCCCUAGACUUCCCCUAUUUCCUCUCCG  
>N344  
GAAAUAAGGGUUGGGGUCAGACUCCUCUACCCCUGCGUGGU  
>N345  
GGCCUGAAAUGAUUGAAAGACUUUAAAUAAGGGCCAAAUG  
>N346  
CUUCACAUUUGACAUUUAAGACUAGACAUUAGUACAUUUAG  
>N347  
UGGGUGCCAUUUUUAUUCAGACUGCCACACCUUCCAUGAC  
>N348  
UGACCAGCACUUAACAGUAAACUACGGUGAGAGUGUUCACU  
>N349  
GGAGAACAGGAAAAUAAAAACUAUGGCAGUUCUAGGCUAA  
>N350  
ACCAGCAUGCAUGCCCCUGGACUAUAACUAUUUGUUACUAU

>N351  
AAUGUCCCCAGUUUUCAGACUACAUAACAGGGCAAUCAAU  
>N352  
AUAGGGAUUUCACUGUCUGGACUCACUAAAUGUUACCCUAC  
>N353  
ACUUGAUGUGUGGUUGUGGGACUGGGGAAAAGGAUGGAAAC  
>N354  
UUUUUGCCACCUUGACAAAAACUAAUUGACACCCGGGAGGGG  
>N355  
GUGUGAAAAAAAAAAAAAAAAACUCUCUGAUUCCUCCAGGGA  
>N356  
GUACACUUCUCACAUGGAGAACUUGGGAUGGGUGUAUCAGC  
>N357  
AUCAGUCUGUCCCCACUUGGACUCUAGGGACAUUUUUUUGG  
>N358  
UAGAAAUGCCAAAGACGCAGACUAAUUCUGUAUUGGGGUUA  
>N359  
CUUGAUUAUCAUGAUGAAGGACUGCAAACUACCGAGAUUU  
>N360  
GUGGUCUCCCCUUUGGGCAGACUGGGUCCCAAGGUCAUAUG  
>N361  
AAUUCUAAAUCAGAUAGGGGACUAAUAUCCAAUAUAUACAA  
>N362  
AAGUUCUGUAAUUGGUUCAAACUACAAAAGUCUCCCCUUGG  
>N363  
GUUAUGAAAGGCACUGCGGGACUGUGGCUCUCGAGCCACAA  
>N364  
UCGGGAAAGGAAUGGGGGAGACUGAAAAUAAUACAACAGGC  
>N365  
UGGUCCAGGCAGCUGCCCAGACUGGGAUCUUUGGUGCUAAG  
>N366  
UUUGCCCAGGCACCGGCAAAACUUUUUAUUGUUUCGGGGACC  
>N367  
AACUUUUGCUGAUUAACUGAACUUAAGCUAAGCUAGGUGGU  
>N368  
GCCUAACAAAUCCUAGUGGACUUUGAUUAUUAAGACACAG  
>N369  
GUUGCAGUUGAGGGCCAGGACUAAAGGGAUCAUACAAAGG  
>N370  
GCUGGCAGUGGCUGGCUAGGACUUUUUUUUUUUUUUUUUUUU  
>N371  
UCCAUGUUGAAUUAUGAGAACUUUGAAUGCUCUUUACUUU  
>N372  
AUUUCUGUAGCCAAGAAGGACUCCCGGUGGAGGGAUAAAGG  
>N373  
AGAAGGGCUAUGUGAGGGGGACUUGGAGGUGAGGGAGCUGC  
>N374  
UCUGAAAAUACACUUUUUAAACUCUAAAUGUAUUUCAUCGU

>N375  
CCUGUCUCGUGCUCAGCCAAACUGCAUCGUUAAGUCCAUA  
>N376  
UGACCAACCUUUUAAUGAAACUUUUUGUUUAUCCACCUGA  
>N377  
AACCAUUUUGAAUACAUAGGACUCUGGGUGGGGGGUA  
>N378  
AGAAUGAGAAGAAGAGGGGAACUUGAAGUUAUUUGUGUAAC  
>N379  
UCCUCGCCAACCACAAUGGACUUCUUGACAUGGAUUUU  
>N380  
AAACGGGCUACUCACCCAGGACUAUUAAAAAUAAAAAAG  
>N381  
AACAGUAGGAAGCGCCACAGACUGGAGCCCAGCUCUUAAGA  
>N382  
AAGAACCUGUGGUGUGCCAGACUGUUGUGAUUUUCAGUAUU  
>N383  
UUCUUACCCUCCACCUGAGACUGUUAGAUCCEAAGAAACA  
>N384  
GUGUCAGUUACAAACAAGAAACUGCCAAAAGAGAGGCCCC  
>N385  
GUAGUGCUGGUCCUCCUGGAACUCACUCUGUAGACCAGACU  
>N386  
ACACAUAACAUGAAUGUGAACUGGAUGAAAUAUAAGAC  
>N387  
AAGAAAACAUAAGUGUCGGGACUUGAACAUCAUCAAGUCUC  
>N388  
CUCAAAGACCCUAGGGAAGAACUUACUAUUUUUGCUAAG  
>N389  
UGUGAACGAUCCAUAUGGAAACUACCCAGAAGGCAUCCCGC  
>N390  
ACGCUUCUUGGGGCCCCAGACUCAAUCCCCUUCUGCAUA  
>N391  
UAACGCGGAGCGCGGGGACUGUCCUAGCAGGUGUCCC  
>N392  
ACUCAAGAUUUGCUGACCAGACUCCCUGUUGGCGUAUUGUA  
>N393  
ACAAAAAAGCCAAGGCUAAACUCUGGCUUCCUGGUUUUC  
>N394  
CUUCUUUAUGGGGUAGGGAACUUUGUGAGCUACUAAAAGA  
>N395  
CCCAAGGCUGGGAUCAGGAAACUGAGGGGUUCCUGUCCAA  
>N396  
AACCAUUUUAUUUCUUUGAACUCUCUAUUCAGACCUAUAG  
>N397  
UACCUUCUUUGUCCGAAAAACUUUGAGAACCCAAGUUAGC  
>N398  
UUCUGGGCCUGAUAAAGAGGACUGGGCACGUGGGGUAGAGU

>N399  
UUUAACUAAAGAGGUUCUAAACUGGCCACUUGCCUUUGCUU  
>N400  
GAACCCCAACUUUCUGGUGGACUUUGGGAAGGAGCCCUUG  
>N401  
CCUCUGAGAGGAGCUGAUGGACUCCCCAAAUUAGGAACAG  
>N402  
AGACGGAACAAAAGGAAAAAACUCAACAGGGAUCUCUUUC  
>N403  
AGCUCCUAAGUGUCACAGGGACUCGAGUGGGUCCAGCGCGU  
>N404  
AGACAGGUGAGCCGCAAUGAACUAAUCCACCCGGGUUGUU  
>N405  
GUGCUGGGGAUCAACCCAGGACUUCUACAAGGGUAGGCAA  
>N406  
CAAGACUACAGCUAUUUAGGACUGGCCGCCGACCUGGACAG  
>N407  
AGAAAGCUUUUGUUAUUAAGACUAGAGGUGGAGCCCGGCAG  
>N408  
GGUGGUCUCAGAGUUUUCAAACUUAUAUUUAAAACAUAUU  
>N409  
CUUAGUAACAUGUGUUAAGAACUACGAUGUGGGGGCGCCUA  
>N410  
AAAGACCCCCCCCCCUAAGACUUAACCAUAGAAAUACCGUG  
>N411  
CCUUCAACAGGACCAAGUAGACUCACCGGCAAAAGGUCAUA  
>N412  
GAGAGGGGAAUGGUGUUUGAACUCCUGACUCUCCUCUUUU  
>N413  
ACAAAUGAUGUGGGAAUAGAACUCCAUAUGGACACCUCUUU  
>N414  
GGAGCCAACCAUCACACUGAACUAAGGGGGCCUGGUGGGGG  
>N415  
UAUCUGAAAUACAAAUUAGACUGAGACAUUUUUUCUAAU  
>N416  
UUUGGCCUCAGUGGGAAAAGACUUCCCUAACCCUCAAGAGA  
>N417  
UAUUUGGUUGUCACCACUAAACUCCUAGUUUAGCUCAAUA  
>N418  
UAACCAUCACUGAGAGUAGACUCCAAUGUUAUUUCCAAU  
>N419  
UGGGCGGGGCAGGGGUGUGGACUGAUCGGGAGCCGCCACC  
>N420  
UAAGCUUAGGCCCCGCUUGGACUCUUUGAACCCCUACAAU  
>N421  
UGCUGAAUGUGGGUGUCCAGACUCUGUCUGUAUCUACUUGC  
>N422  
AUCCCAAAGAGAACAAAGAAACUGGGUUUAGAAACACCUAA

>N423  
GCAACCCUACUUCGCGACAGACUCCCCCCCCCCCCCCCC  
>N424  
UAUUGCGGGGGUGGGGGGACUCUCAUUCAAUCACCACAU  
>N425  
CCACUUAACCCUCCCCUAAAACUCUCCUGUGACAAGGCUGG  
>N426  
GAAUCAGGCCUUCAGUGUGAACUUGGGGGACACAAACCUUC  
>N427  
UUAUGCAAUAGGGCAUGGAACUAAUAUGGGUUGGAGAGAG  
>N428  
CUCCUGGCAGGGACAUCAAGACUAAGGAAAUGGAAACUAU  
>N429  
AAAGAAGCCGCCACUAAAGAACUAUUUGCCUUUAAUAAAG  
>N430  
AGUAGCUAGGUGAUUUCUAGACUGGGCUUCAGCCUAGUACA  
>N431  
GGGACAAACCCACCAAGGAGACUCCCAAAGAGGCGCGUUC  
>N432  
CAAGCAUGGACGGGGGAAGGACUCGAGGAAUGCUGUCACUC  
>N433  
CUAAACCCGUCUGGUCCUGGACUUUUUUUGGCUGGGAGACU  
>N434  
GAUAGAGGUAUACAGAUGGGACUCAGGGACCCAAAUGUGUU  
>N435  
GGGUUGGAAGGAGUGGCAAGACUAUGUGUGAGCUUCCACC  
>N436  
AACAAAAUUAGGAAGGAAGAACUCAGAGAAAGAGAGAGAGA  
>N437  
AUUUUUUUAACCAGAUGGAACUGGAAUUUUCUCCACACG  
>N438  
CCAGGGUUUUUUUAAUUGAACUGUCCAAAACCAAAAAGG  
>N439  
UUUAAAAAUGACCUCUAGGACUGGGGAGAUGGCUCAGCGG  
>N440  
GUGGUUUCAGAAAGACCUGAACUUGGGUCCUAGAACCCAGG  
>N441  
AGAGGUCAAUUGUAAUCCAGACUGUUCUGUUAAAAAAAAAA  
>N442  
AGGGUGGUAGGUGAAAGAAAACUCACUCACGCCAAAUAAGU  
>N443  
CCCUUAAGUGUAGAGGUAGGACUUGAGGAGAUAGAAAUGUU  
>N444  
GCCUCUGGGGGACUACAGAAACUCAACUACCAACCAAAGAG  
>N445  
AAGAAACAGAUUGGAGUAAAACUCGUCAGUCCAAUUUACCA  
>N446  
CAUGGAGAUACUCUCCUGGACUUUUCACUAAUUUCCACC



>N447  
UUCACCAUUGGGGUGCCCAGACUCAGCCCGAUGUUUAACUA  
>N448  
UAAUUAAAAUAUAUUAAUAAACUUGAAGUAUAUAUGCUGC  
>N449  
CAUUGUUUUUUUAAAAAAAAACUUGUAAACACAUUCUGUAU  
>N450  
GUGGAUGGUCAUUGCGUGGGACUAGGGUGCCAACUAUUCGC  
>N451  
UAUUUGCACCCAACCAAUGGACUGAAGCAGCUGACCCCUGU  
>N452  
AUGUAUGGCCCUUUCUGGAGACUGUGUAUGCAGUAAACAGU  
>N453  
GGAGUCUCCUUGGCUCCAGGACUCCACAGAGGGCAGGCUGC  
>N454  
AGUAGCUGGAUAUAAAAUAAACUCAAACAAGUCAUUGGCCU  
>N455  
AGGAGGUUAUACAAUGUCAGAACUUGCCUGCACUGGGUUGGC  
>N456  
GUUGGAAUCGAUUAAGAGGAACUAGGUAGGUAGGUGAAGUU  
>N457  
UCAUGUAAAAUAAACCCCAAACUCCCAUGGCUACCCAGGAU  
>N458  
CCUGACAGCAGGGAAAGGGAACUUAUAAAGCCUACCUCAG  
>N459  
GGUAGUCCAGAUUACCACAGACUAAUAAGUACUGUUUGAAU  
>N460  
ACAAAUAGACUCUGGCACAAACUAUAUGGAGGGGUUCUAG  
>N461  
AAAUGUGGUUAGGGUUAUAAACUCACAUAUCCUUUGUCUAU  
>N462  
CAUUCCACUAAAAUCAGGGACUAGACAAGGCUGCCCACUU  
>N463  
GUGAUCUUGAGGUAACCUAAACUAUUCAUACUGGAAGAAAA  
>N464  
GACAAAAAGGCCACCAACAGACUGGGAAAGGACUUUUUAUAG  
>N465  
AAGGGAUUUGUGAUGUUGGGACUUGGGGGAGGGUAUGGCCA  
>N466  
UAAUGUGGGCGACUGUCUAAACUUGGUUCCCAAGGCAUAGU  
>N467  
CCUUGCGGGUGUUGGGCAAGACUCUGCUGUCAAGGUAGCCC  
>N468  
AGCUCCAGGGCAGGUGGAAACUGGAAGGAUCCUGACGAUA  
>N469  
UGAGGCUUGAGGGCAGGUAAACUGGAUCUGAGGGCAUGAGA  
>N470  
AUUGCACCUGGGCAUUUAGACUUUUCACCUGGCUCCUGUG

>N471  
AAGCUUCCCCAGAGCUGUGAACUUUGAUGAAUCAGGUCUUU  
>N472  
AAAGUAUUGUCUAGGACAGAACUUUAAAUACCCUUCCAUUC  
>N473  
UAUUGUACUAUUUAUUUAGACUACAGCAAGUUUUUAUUUU  
>N474  
UCCUUUGCCUAGUUUCUGAACUAUCAAAUAGAAACAGUGU  
>N475  
AAGCUCAGGGCUUGAUGGGGACUUACAGAGAUAGGACUGGU  
>N476  
CAUAUUCACACAGUUCCCAAACUCAAUCCCCCUUCCUCUCC  
>N477  
GUAUCCACUAUAUAAACAAACUCAAGAUAAAAACCACAU  
>N478  
GCAAGCAUUCGUAUAAUGGAACUCCUCUGGACCCUCAGCAA  
>N479  
UACUCAGCGAAUUGCACUGGACUGCACGUUGUCAGUCCUGC  
>N480  
CAAUCCUGUAAUUUAAAAGGACUUCCCAAGGUAUCACCAUU  
>N481  
AUAUCUCUUAACAUCAUUGGACUUAUUCCCCCCAAAAAG  
>N482  
GAGGACAAUAACUUUGGGGACUCUAACACUAGUAUUUAAG  
>N483  
UGACACAGAACCCUUCACAAACUCGGGAGCCAAAGAUGGUU  
>N484  
UUGUACAUCCAGACAGGUAGACUAUAGUGACUAAUGCUAGC  
>N485  
GGGUUAGGGUCACCAUCAGAACUGUCUGGGGGGAGAUGUAC  
>N486  
AUAUAGCUGUCUCUUGUGAGACUAUGCGGGGACCUAGCAA  
>N487  
CUGUGACCGUAUGUUCAGGAACUGCACAGGUUUGUUACCAU  
>N488  
ACUGACAUGAAUCCAAAGGGACUAUUUUGUGAGCAACAUG  
>N489  
AGGGCAUUGGAUCUCUUGGAACUCAAUUUUAUAGGUGGUUAU  
>N490  
ACUAAAAUACAAGCGGAGACUCCCUGCUUCUCAAGAUUG  
>N491  
AAUUCUUCAUAGAUCUCAGACUGUGGUGUGGUGGCAUGAG  
>N492  
AUCAUCGGCCGAGUGUCCAGACUUUUACAAGGCCUAAUGGU  
>N493  
GACUUGGCCAUCUUUAUUGAACUGGGGCAUGC UUUGCUGAU  
>N494  
CCCCAGGGUGUGACAAAGAAACUGAUUUUCUUCUUGGAAUG

>N495  
UUGAUCUUAGUCAAAUGGGGACUGGGGGAAGUCCCAGAAUC  
>N496  
UCAGGAGACUGAUUUGUUGGACUAGCCCAAUCAUAGCCUGU  
>N497  
GAGUUUGUUGUUCAGUAUGGACUCAGUGUUUGACGGAGUGA  
>N498  
GCUUAGACCUCCUCCACUAGACUCAACCAGUACAAGUUAAA  
>N499  
GGCUAUUACAAUCCAGAAGGACUAGGAGAUAGGUCCCUGAG  
>N500  
CAAAGGAAGUCAGGACCGGAACUGAAGCAGUCUAAAUAUUG  
>N501  
CAGAUUACAAUCCUCUCAAGACUUAGAGAACCAGAUCACA  
>N502  
UAAAAAGUGUUGUUUAUGGACUCCAAAUAUAAUGAGGAGU  
>N503  
UUUUUUAGAAUUAUUUUGGGACUUUAUUUAGUUUCACUUA  
>N504  
AAAGUGGAGAAUCGCCUUGAACUCAUUGGUAGAGGAGACAA  
>N505  
GUUUGGGGACAAGUUAAGGAACUAUGAUAACCUCAGUGUAG  
>N506  
GCCAUUGCUAUCAAUUCUAAACUACUAUACAUCUUCUGAA  
>N507  
UAUGAGAGAUAAACCAGAUAAACUAAUAAUUGAAUUUUCCU  
>N508  
ACAGUUUAUUAGGAUUAGAACUGUAGUGAGAUUUUUGAAG  
>N509  
GUUUUAAAAUUAAGUGUGGAACUGGGUAUGUAGCCGACCAU  
>N510  
AAGGUGAUAGGGAGGAUAAGACUUAGAGGAGGAGAAAGAAG  
>N511  
GCAGAAAAUCAUGAGUGGAACUGAAUCUAGGCCACAUAUA  
>N512  
AAGGUUUAAACAAAAUAGGAACUAUUUUUAAAGUUUCACAA  
>N513  
UGUACAAAACCCAGAUUGGGACUAUAUUUUUCUAGAUCAUU  
>N514  
AUUUUCUUGAGACACUCUAAACUUAUUUGAAACAGUUAAUU  
>N515  
ACAGGAAAAUAUGGGUCAACUUUUGACUGUGGGAUGGCA  
>N516  
GUAGCACAGGUUGGCCUUGAACUCUUGUCUUCUUGCCUCCA  
>N517  
AAUAUAUAGCUGGGUAUAAAACUAUAUUUCUUUGUAAAGGG  
>N518  
CAUGUUAGAUUAUAAAAAGACUACCAAGACUUAGGAAUA

>N519  
CAGUUGGUUAGACUGUGGAGACUUCCAAGGGGUUGCUUAC  
>N520  
GCUAACUUGACAGGUCUGAGACUUAAGAUACACCAUUUAUG  
>N521  
CUAGGGGAAGUGGGAUCAGAACUCCCUUUAAGAAUAUCAA  
>N522  
CUUGAGAAGGGCCAUGUAAACUGGUGUCAUGGUAGGGAGG  
>N523  
UGUGUGUGUGUGUAAUAUAGACUCAGGCAUCCUAGAACC  
>N524  
CUAAACAGGGACACAGUGAAACUAACAGAAGUUAUGAAACA  
>N525  
UCCACCAGAGAACUCCUAAAACUGAUAAACAGCUUCAGAGA  
>N526  
ACUUUGUCCCAUUUCUAAAAACUAUGUCCUGCAUCUUUUC  
>N527  
UCUUCUCUCUCCCAAGUGGGACUGAGGCAUCCUCACUUGG  
>N528  
AUUAAAGGUGUGUCCUAAAACUCGGAGAUUCAAUUCUUCG  
>N529  
UUAUCUUCUCAAGGAAAAGGACUCAAUUGUUUUCAAUU  
>N530  
GAAGCAAUCAUGAAAAUAAACUAAGGUUCUAGUAAGGCCA  
>N531  
CUUGGAAUAUUGUGUCCAGACUUUUACUCUGAGGUAGUU  
>N532  
AAUGUUUCCUGUCUAAAAGAACUUCAGGGACAAAAAUGGAG  
>N533  
UUCAGCUUCUCAGUACCCAGACUGCACUGCAAGUGCCAUC  
>N534  
AUAGUAUUUCCACCACAGAGACUCGAGGACAAGGUGCACAG  
>N535  
ACCGGGGAUCAAUUUGGGAGACUUAACAGUAGCCCCUUC  
>N536  
ACCUUGGAACCCAGGGAGACUACUUAUAUACACCCCAGC  
>N537  
GGUGUGUUAGGUUAUCCAGGACUUGCUGAGUUGGGAGUAUG  
>N538  
AAAGGAUGGACCAUGUAGAGACUGCCAUAUCCAGGGAUCCA  
>N539  
CAUUCUAUGAGCUACUGAAGACUUUUUUUAAAAAUGUGUA  
>N540  
AUAUCCAUAUAUAUAAAGAACUCAAGAAGGUGGACUCCAG  
>N541  
GGUAACCCAAUCACAAAGGAACUCACACAAUAUGUACUCAC  
>N542  
UCACACAAUAUAGUGGGAGACUUCAACACACCACUUUCAC

>N543  
AAAGAAAUGAGAGAAGCAGGACUGAGGGGAGGAAGUUUAAA  
>N544  
ACCUUGUCCUCUCUAAUCAAACUUAUUUGUCUGGUUGAGC  
>N545  
GAGACUUCUAGUUUUACUGAACUGAGGUGCUGUGCUGCAAU  
>N546  
GGUAAGGAGGAAGUGGGCAAACUUUUUCUAGUCCUGAUUUU  
>N547  
CUUGGCACUGAACUUCUUGAACUCAUGAAUGAACUAAAUC  
>N548  
AAUAAAGAAAGAAUUAAAGACUUUUUAGAGUUUAAUGAAA  
>N549  
GAAGUCCCUUGUUCUUGCAAACUUCAUAUGCCCCAGUACAG  
>N550  
AAAAGGCUAUAUUCACAAAACUGGAAAACCAGGAUGAAAU  
>N551  
ACAGAGCAAUUGUGAUCAAAAACUGCAUGGUACUGGUUAUAGU  
>N552  
AUUAUCUCUGCAUUUAAAAGACUAAAUAAAUGAAAGGGUA  
>N553  
AGGAAGAAAAGGAAGUGGAAACUGACAGUGAUCAGGACAUU  
>N554  
AAAGAUUGAGGGCAAGGCAGACUUUCUGUCAAAGCCUCUG  
>N555  
AGAUCAGCCCUCAAUUAAGACUUCAUUUUCAUUAUGAUUUAU  
>N556  
UCCACCAACUCAAGCCACAAAACUUAGCAACCCAAAGACUCC  
>N557  
CUGAACUCUUAUUGCAGUGGACUGCAGAUUCUGAAGUGUGU  
>N558  
CAAUCCACUAAAUCAGGAACUAAACAAGGCUGGCCACUU  
>N559  
UUGUUGGGGAUUGCAUUGAAACUGUAGACUGUUUUCGGCAA  
>N560  
UGGCAGGAUUGCCAGGUAAAACUCUUGUGGUUAUUUGCUGA  
>N561  
CAUCAAUUAUUAAUUAACCAGACUCCUCUGAGCUCCAGGAA  
>N562  
CUGAGUGCCUCCAAAAGAAACUAGAGAGAGCAAACACUAG  
>N563  
UUUCCAGAUCAUAUCUGAAAACUAAUACUAUCACAAUGUUA  
>N564  
CCUAAUCAUCUAGAGCCAGGACUUUAGGGGCCUUCACCUUC  
>N565  
CACAGCUAUCCACAACAAGGACUUGAGAGUUUAGUGCAGA  
>N566  
GUGGGGGGGGCUAUGGGGGACUUUUGGGAUAGCAUUGGAA

>N567  
ACUCACCAGCCUGGUCUCGAAACUCAGAAUCCAUCUGCCAU  
>N568  
UGGGAAACCAUGAAAGCAGAACUAAGAGUAAAAUUCAUAGC  
>N569  
CAGAAUAGCUAAGAUCAAAAACUCAGGUGACAGCGGGUGCU  
>N570  
AGGCUACAUAUCCAGCAAAACUCUCAUUAUCAUAGAUAG  
>N571  
GCAUAGGGGCCCUACACAAAACUAUCCUCAGGCUCAUCAC  
>N572  
CCAAUCGCGCGGAACCUGAGACUGUGGUACAUAGGGAAGCA  
>N573  
CCCGCAAGGGCCACACGGGACUCCCCACGGGAUCCUAAGA  
>N574  
GAAGUGUCCUGUAAAACAGACUGUUGAGAAGGAUUCAACU  
>N575  
CAUUUGUUAUUAACUCAAAACUGAACUAAUAUCACCCUUG  
>N576  
AGCCUGUUUUGGGAAAAAGAACUACUGGGCAAUCUGAGCUC  
>N577  
GGUACCUCUCACUGGCUUGGACUGAGAGUUUGGGGGAAAC  
>N578  
AUCUAAUUAAGAACUAUUGGACUAGUGGGGAAGUAUGCCU  
>N579  
AUCCAGGAAUUGUUUUGAGACUGUAAAGACAGUCUCCUGU  
>N580  
UACUGGUUCACCCAAUGAGACUGGUCAUACCGUGAGUGGG  
>N581  
GAAGUUUCUUUUUAGAGAAACUGUGGUUAUAUGUGUGUUU  
>N582  
AAUAAUUUAGGGAUCAGCAGACUUCACGCUAAUAAGAUGU  
>N583  
AUCCUAUGAAGAACAAGAAACUGGUUUUUUUUCACGGGA  
>N584  
CAGUCCCCUUCCAUCUUGAACUCUCCUUGGGCUUCUCAGA  
>N585  
CCUAUGUAGCAAAGCAUGGAACUAUAUUUGAGAUCACAGUG  
>N586  
UGUAAAUUUUUCUCCUGAAACUGUUUUGUUUAAAAGCUA  
>N587  
AAAAUAUGGAUAUAGAUAGAACUUUGUAUCCUGUCCUGGU  
>N588  
GCCAUGCAGGCACAGCGGAAACUGCUUCUCACACUUUCUGA  
>N589  
GUCUUCUCAUUGUGUCUUGGACUCCUGGAUAUUUUGAGUU  
>N590  
GAACUGGGAAAAAGGACCGAACUGCGAUGACUGGGGAAGAA

>N591  
GGGAUAGCAGCUCUUACAAAACUUACAUA AAAAGUCAAUAGG  
>N592  
GGGUUUCAGUAUGCAGCAAACUGUUGGGUCCUGUUUACAU  
>N593  
GUUGAUUUUUUUUAGGGGGGACUAGACGUAGUUCACUGUGU  
>N594  
ACGAUUACACUGCUCUUCAGACUUUGCUC CCCAGAUGGAUA  
>N595  
GGAGGGAGGGAGGAAUAUGAACUCUAAAAGAACACAUUUGAC  
>N596  
AGAGGGUGUGGGAGUUUUGGACUCCACAGACAAGGUCAGAG  
>N597  
UAUGGUCAAGUAUGUGUAAAACUUGGGGGAAAGCUUUAUGA  
>N598  
AUUUCUUUAGGGGAUAUGGGACUGUUUAGAAGGUCAACUUG  
>N599  
AUUCCAGCCAUGGACCAAGGACUCUUGCUCACAUGAAAACC  
>N600  
AAAAAUCACAAAGGGAGAAAACUUUGGAAAUAGAAAACCUA  
>N601  
CCUGGGGAUUUAUCCCAUAAAACUACCAUCAAAACCUAGACAC  
>N602  
UAGCUUACUUUUAUUGUGGGACUUCUAACAGUGGGCAAAGG  
>N603  
AUACAUUAAAAAAGGUAGAACUGGCACAUUCCUGUGUUUGU  
>N604  
UGUGGCUUCAUUUUCAUUAAAACUCUAAAAAGUCUUUAAUUU  
>N605  
GAUCUCAAAAGUCCAAAGUGAACUGCCUCUCCCAGCUUCUC  
>N606  
GCCACAUGAACAGAAUCCAAACUCUAGCAACAAAAUAACA  
>N607  
CAGAUGUCCCUCAAGAGAGGACUGGAUACAGAAAUGUGGU  
>N608  
CUAUAAAAAGAAUCAACCAAACUAGCAGCUGGUUCUUUGAG  
>N609  
AAUCCCACCAACAAUGGAGGACUGUUCCUCUUUCUCCACAU  
>N610  
UUCUUUGAAGGUCUGAUUGAACUCUGCACUAAACCCAUCUG  
>N611  
CUUUUGUUAUAACAUGUAGACUGAAACAGAGUAUGCUAUA  
>N612  
UGGUUGGGUGGGGGAAAAGGACUGAAGCCCUAAGGGUCAAC  
>N613  
UCUUUCCUGCCAUCUGUGGAACUUAUUAGUGGUGAUUUCAU  
>N614  
GUUGUAAGUCUGACAAAGGGACUGUAAAUAAGCGUGCAGC

>N615  
GACAGCCACAUUUUUUAGAACUACGUUUCAGAGCCAUCAU  
>N616  
UCAGAUGCCGUAGGAUUAGAACUGUGUACCUCUCUCCUCA  
>N617  
AGUGGCACCCAAGUGAAGGGACUGAACAUGGGGGGUGAAGG  
>N618  
UUAAUUUGAUUUUAUGCAUGAACUAGAUUAAGAAUUCAAAUU  
>N619  
CUUAAAACUAAAACUGAAAAACUGUGCCCUCUUCCUUCUG  
>N620  
UCCCUUCCGCUCUACUCGAGACUCGAGCCCCGGGCUACCUU  
>N621  
AAAUUAUUCACCUAUAAAACUUGCAUUAUAAAAUCUGC  
>N622  
GAGCUGUGGCCGAUGGACAGACUUACCCAGACCUAGUCAGC  
>N623  
UGGAACUUGUCCAGUCCAGACUCACCUUGAAUUGGAGAU  
>N624  
UUUAAAUGCUCUUCAUGAGACUUAAACAGAGAACAAAGCC  
>N625  
GGCUUUUUUUGGUUGGAGACUAUUAUAACUGCUUCUAU  
>N626  
CGUGGAAAGAUUUGUGUGAACUUGGUUUUGUCGUGGAAUA  
>N627  
UUAACAAAUCAGAAAGAAAACUGAGAUGUAAAAACAGAAU  
>N628  
AAACUUCUGUAAGGUAAAAGACUGUCAUAAGACCACAAGG  
>N629  
AGGGGAUUUUCGGAGGGGAAACUAGGAAUUGGGAUACCACU  
>N630  
GAAGGGGGAUCAAGACUGGACUGUGAAAAAGGAUUAAGA  
>N631  
UAGAAUGUUAUAUUGUUUGAACUUGUGAGGGUUCUCUGCAU  
>N632  
AAUUCUCCAGGGUGACCAGAACUCAGUCAACAUUUACUUA  
>N633  
AUUAUUACAAAAAAAAGAGACUGUUUCCCCAUGAGAGGUC  
>N634  
AAAAACAGAACAGCACCUGAACUGGAUGGAUUUGUAAUUUU  
>N635  
UCCAUCGCCUACAGAGAAAACUCUCAUCACCAGUAAUGGU  
>N636  
AAAUAGGAUUUAGUCCAGGACUCACAGGGACGAAAUCACU  
>N637  
CUCUCUUACAAAUUAUCAAACUAUUACAACCUGCUCAACC  
>N638  
UCACAUCUAUUCUCCUUUGAACUUAGUGUGUCACACCUGAG



>N639  
AUGUCUGAGAGCUGCAUAGAACUGGCACCACCUACACCUAA  
>N640  
CCCCAUUAUAGACUACAUGGACUUUCCAAUCCAGAGUUUCU  
>N641  
AAAAACAAUGACUUCAUGAAACUCACAGGCAAUGGAUAGA  
>N642  
CUUUGAUCAGCAGGUAAGAGACUCUCUUCAGAGGACACAG  
>N643  
AGUUUUGUUCUUUGUUUUGGACUAGUUUUUCAUUUUCUUU  
>N644  
AUGUUUGUGUACUUCCCAAGACUUUAGGAGCUAAAAUUUAA  
>N645  
UGCAGAAAUGUAUGUUUAAGACUAGAAAUAUCCAAUAAAG  
>N646  
UAGUCCACUCUCAUCCAAGACUGGCUCAGUGUAUCCAACC  
>N647  
AUAUCUUUCAACUUCAGUGGACUCAAUUCCCAAUAAAAAG  
>N648  
UCCUAAAAGAAGAGGCAGGGACUGAUGUCAUACUGGCUUC  
>N649  
CACCAUCAUUUUCUGUAAGGACUGUGAGCAUGGAUAGAACU  
>N650  
AAAAAUCAGACUGCCUAAAACUAAAUUGUGUGUGUGUGUG  
>N651  
AUUCAUUUGGAAUAACAAAAACUCAGGAUAAUGAAAACUAU  
>N652  
UCCCAAUAAAAAGACAUAGACUAACACACUGCAUUAUUA  
>N653  
CUCUUGCAGUUUGCAGCAAGACUGUUUCUUGUCAGUGAUUU  
>N654  
AAAGGGACUAUUACUUAAGACUAAGUGCCACUUAUCAA  
>N655  
AUGCACCUAGCCCUAAGAGACUGGAGGCCCUAGGGAGUUU  
>N656  
UCUUUGUCCUUGAGAUGAGAACUAAAUAAAAAAAAAUGCCUU  
>N657  
UAGGGGAGGGGAGACUACAGACUUGGUGGGUGACAUGUGUC  
>N658  
UGCCAGGAGGCAUGCCAGAACUCCUGUAGUCCAAUGCAGG  
>N659  
CUUGGUCCGGGACCCGCCGAACUUAGGAAAUAGUCUGAAC  
>N660  
GAAUGGAAAACAACUCUUAGACUCCAUAUAAUGCAUCAUU  
>N661  
UGCUUGCAGCCAUCUAUUGGACUCAGCACAGGGUCCCAAU  
>N662  
GUUAAUUUGUGUUUACAAAGACUAAUUUUGC UAAACAAUC

>N663  
AGAGAAACUAAUUUGAGAGGAACUAAGGAGUGUUAGCUUUGU  
>N664  
UGGGUGGGGCAUUAGCCAAAACUAAGUAUGCAAGCAAUUC  
>N665  
ACCCAACCAUGAGGCUCUGAACUAACAGGCAUGUGGAUGAG  
>N666  
AGGGGUUCUGAAUGCCCCAGACUCAGGAGUCUACCCGAAGC  
>N667  
CUGCUAUGCCAAGAUUUUAAACUCCGGUUAUUUAUCAAUA  
>N668  
GACAGAUCUGUGUAAGAACUUCAAGUCUAUGAAGAAAG  
>N669  
CUACAGUAAAUAAGAUCCAAACUAUUUCCAGAGGGACAGUC  
>N670  
AAAAGUGACAGAAGAGAAAGACUUUCUGAAUUCUCUCUCCC  
>N671  
GCACCUCUCACCUGUUCAGACUAAUUUCCUAAGUUCGGUG  
>N672  
AACAUUGAUUUUUGUUAGGACUUUGUAAACACAAACCCAU  
>N673  
GUAUAUAGAGAAGGGAGGGGACUCCAGUAGGGGCUAAGGAA  
>N674  
AGCCAGUGUGGUCACCCAGGACUGUAACUAUAGCUCUUGGG  
>N675  
AAGUCUCCCAAGGCUGAGAGACUUGGAGAAGGUGGCUCUGC  
>N676  
GCCAGCGAUACAGCAUGCGGACUCGGGGACAACUCUGGGUU  
>N677  
GGAACAAGAGCUCAAUUAGAACUACCCCACACCGGUUGUUU  
>N678  
AGGCAGGCAGGGCUCUGCAAACUCAAGCUAGAUUGGUCUC  
>N679  
GGAAAAGGUUUGAAGAGAGAACUGGUAGGCUGGAGCCCUGU  
>N680  
GACUUACUUUCAUCACAAGAACUGUAACCUUAGCUAAAACA  
>N681  
UAUAAGUCAUCUUAAGAAAGACUGUCCAUGAGCCGGGUGU  
>N682  
AGAGAGAGAGAGAGAGAGACUGUCCAAAUAUAGAGGCAU  
>N683  
GCCUCCAGGGAACCAGCAAGACUGGAGGGGAUAACAGGGCG  
>N684  
UGCCCUUAAAGUUAAAAAAGACUAUUGAAGUUUUUAUAAC  
>N685  
AAAUGAAAUCUGAGAUUUGAACUUUAGUUAUUAGGGGUUUU  
>N686  
AUGGCUGUGGCUGAAUGCAAACUGGGAAAUAUUUGGUGGC

>N687  
UUUGACGGAGACCCCUUAGGACUUUGUCAUUUUGUAAGGGA  
>N688  
GGACCUGCCGUUACCACUGAACUUUGCCUAGAGACCAUAUA  
>N689  
CUUCCUCUGGGUGUUGUGGGACUGGCUGUGGAGUUCGUGCU  
>N690  
GAAAAGGGGAACCUUUCAAACUAUAAAACCCUUCCCUCAA  
>N691  
UGGGGAAGUCCAUGGUCUGGACUAACACCUGAGGCCAUGUU  
>N692  
CGGUGGCCCCCAGGGAUCAGACUCUGCAUGUACUCAGGUGA  
>N693  
UCCUGGAGCUCACUUUGUAGACUAGGCUGGCCUCGAACUCA  
>N694  
CUGACCAGAGAGUAGGGAAAACUCUGGCGGGGCAGGGGCCU  
>N695  
AAAAACCGAGGAUAGCAAAAACUCUUCUCAAGGAUAAAAGA  
>N696  
GGAGGUAAGGGUGUUAGGAACUUGCGCCAUUUUCUUUCUU  
>N697  
GAUGGUACCCCUACAAUGGACUGGGCUCACCAUCAUCAU  
>N698  
UCCACCUUGAUGAUAAACGGACUUGAACCUCUGAACCUGUA  
>N699  
AGGCAAAGAGUUUCAUGGAAACUCACCUCUGGAGUCUGGC  
>N700  
CCACAAAUUGUACAAGGAAACUCCUAUAGCUAAUAAAUAC  
>N701  
UCCUAGGGAUUUUCCACAAACUCCUUUUUUUUUGUAUGCU  
>N702  
AAAGAACAAGGCUUACAAGACUGGCUCAGGGUCUGUCGAG  
>N703  
GCUAAAUCUUUAAGAUCAGACUCUAUUUUAGAGAACCUGA  
>N704  
GUCUAUCAUAGUGGGGUAGAACUAUGGAGGUUGGAACACCA  
>N705  
CUGUUUUGGUGGAACUCGGAACUAUGUGUUUUCUCUAGG  
>N706  
GAGUGGCUCUGAGGCCAGAGACUUGUUUAUCACCUCUCAU  
>N707  
UGUAAAGACCAACAAUAUAAAACUAACUGGGGCCCCUCAGA  
>N708  
CCAAGCCCAGAGAACUACAAACUAAUUUGGGUAUUACGUAU  
>N709  
AUGAUGAAUAUGUGUUGGGACUCAUGAACAUGUAAGAUGG  
>N710  
CUUUAUUCAUAGUAGCCAGAACUAGAAAUAACUUAGUUGUC

>N711  
AUUUUGGAUAGAGCUUGGGAACUUGUAAGCAAGAGUUAAGA  
>N712  
ACAACAUUUUCAGCUUUAAAACUGCUUCCAUCUCAAGGGGA  
>N713  
UGGUGGUCCAGUCCCCAGAAACUCCAGGGGGUCUGGCCUGU  
>N714  
AAAGAUAGUUUCAUAUCAAACUGCAUAGAAGUUCCCUUG  
>N715  
UUUAGAGACUUACUCUAUAAAACUCCAAAGUAUUGUUUCCAG  
>N716  
UGUCAGCUUCUGUGGUGCAGACUCUCACCUGUGCAGACUAA  
>N717  
AAUUUCUAAGAAAUUUGAAAACUGAAUGUAAAGUUAAUUUA  
>N718  
GUGCAUCUCUAGUAUAGUAGACUCCCUUUUAUGGCCCAAU  
>N719  
GUAUUAAAGUCACCAUACAGACUUGGUUAGGGAAUAUAGU  
>N720  
GAUGAGAGCCUGUCCAUGAGACUCCUUUGAAGGCUUAUGUC  
>N721  
GUGGCCUCAAAAAACACAGGACUGUUGGUGAGAACCUCAUG  
>N722  
CUCAUCUGUCGGAUCAUAGGACUGUUC CAGGUAAGGGUGAG  
>N723  
GUGGUGGAGCUGGUGGAAGGACUGGAAGAGUGGCGGGGGGA  
>N724  
UAAAAGUAUAUAUAGUAAAACUAAAUCAAAACACUGGGAC  
>N725  
CUAAAGUAUUCACGACAAAACUAAAUUCACCCAUUAUCUC  
>N726  
AUUUUACACCCUAGAGUAAAACUAACAUGUAGGUGAUGGG  
>N727  
UUGGACAUCAAGCCCCAAGGACUCACAAUGCUAUGGUUGCA  
>N728  
AUUUUAUCCUGGCCCAUAAAACUCAUAGAUAGUUUUUUUU  
>N729  
UGAGCCAAAAGAGCUAAAAGACUCUUAUCCUGUAUUAGGAG  
>N730  
AGAGGGGGCACUGACCAUAGACUCAAAAUCUCCGCAACUGU  
>N731  
CUCUUGUUAUUGACCAAGAAAACUCAAACUGGGUUUAGUAAU  
>N732  
GAAAAAUAAUUACUUAGGGACUUAGCUUUAGGAGGGUACC  
>N733  
AUUAUAAUUUGGAGUUGUAAAACUCAAUAAAUCCGUGAUCUU  
>N734  
AACUGCAUAGCAUUUUAUAGACUGGACAUGCCUUUGUGAUA

>N735  
UAAUCACCACACCUCCAUAAAACUACUACUUUAACUGGAGAG  
>N736  
UUUGUCAAAUCGAGCAUCAAAACUUUUUAUACAGAAGAAAAU  
>N737  
UGAGCCACAAUAUACCCAAAACUUAUGGGACACAAUGAAAG  
>N738  
GUGGCAUAGCAGGCCAAAAAACUAGGCCUCCUAAGAUACUU  
>N739  
UUUAAAAAGACUUAAGCUGAACUUUUUCUCUUUUUAUUUCU  
>N740  
GUAAUGGAUUAUUUCCUAGGACUCAAGACCUAGCUAAUUUU  
>N741  
UACUGCCUUUUGGUUUAAGGACUGGACAAAAGGAUGGCCGA  
>N742  
UGGGCUAGAGGAGAAGGUGAACUCUUAUUUAAAGUAGGUUG  
>N743  
AUA AUGUGGUUUUGUCCUGAACUCAAUUUUGAUUAAAGGUG  
>N744  
CACCAGACUUCUCACCAGAGACUAUGAAGGCCACAAAGUCU  
>N745  
UGCAGACAGCCAAACAUUGGACUGAGGGAAGUUAGGGUGAG  
>N746  
UCACGAGUCGAGCGGAAGGGACUUGUGCCCCAGAU CAGGCC  
>N747  
UUUUUUUCCUCCAUCUAAAACUGGAUGGGGAGAUGUGGAC  
>N748  
UGUUAUGCAGAGUAAACAGGACUUGCACAUGCCCCUCUAU  
>N749  
GUACCUGGUGCUGUACCUGGACUUGGUUAUAUGUAUAAGAA  
>N750  
UCAUUGAUCUUUUGUUUGAAACUGGGACUUAGGAAAUCCAG  
>N751  
GUUCCUACUGAGAGGAGAAAACUGAUGACUGUACCUCUUA  
>N752  
AGUGGCUGAUCUUUCAAAGACUGCUGCUGGAACAGAUAAA  
>N753  
AAGUGCCAUAUAGGGGCCUAGACUCCAUGUCUGUCUUGGAAA  
>N754  
UAAUAAACGGGUUAUGUAAAAACUACAGGAAGCUACGCUAUG  
>N755  
GAUCACUGGGUAUUCACAGGACUAGAGUUGGUAAGGUAAAA  
>N756  
AGAACUUUGAGCUAAAGCAAACUCUAUCUCCUUAUUUAAG  
>N757  
CCUUGGAAGGAGUUACAGAGACUAAGUUUGGAGCUGAGAUG  
>N758  
AUGCAGAUAAAAGAAAGAGAACUUAGAUUAUUGGGCUUGAU

>N759  
CUCGGUGUGACCUUAGAGACUGGUACGGACAGAAGUUUA  
>N760  
UGGUUUGCAGAGGGUUCUGGACUCUGAACGAUAGGAGGUG  
>N761  
ACGGGUCCAUCGGGCUGGGGACUCAAUUUCUCCUCGGUUCA  
>N762  
UUUUUUGAGAAAGAACUUAACUUGGUUGGGUUGGAAGGGC  
>N763  
UAAUAACCUGUUUUGUGAAGACUGUUUCUGAUAUGUUUCC  
>N764  
ACUAACCAGUACCCCCCGGAACUCGUGUCUCUAGCUGCAUA  
>N765  
UAAAGAGAAUGACAUGCUGGACUGGCCCGGCACCUCCUAU  
>N766  
ACCCAGGUUUGGUUCACAGAACUCAUGUGGUGGAUUAUAAC  
>N767  
GAGACACGAGCUCUGGAGGACUGGUUAGUUCAUAUUGGUG  
>N768  
GAAUAUUUUUUUAAAGUAAACUUA AAAAGGAGAAGACAAG  
>N769  
GGCCUUCUAAGGGAGAUAGACUGCGUCUCUAUAGGCAAAG  
>N770  
GCAUAUGAAGAAUUGUCUAGACUCAAUAAAUUGAGGGAGAA  
>N771  
AGACAAAGCUUGGAACAAAGACUGAAGGAAAGACCAUCCAG  
>N772  
GGAUAGGGAGUUUCCUGGGAACUGGGGGAGGGACCAGGAAA  
>N773  
UAUUGGGUUUUUUUCUAAAACUUUAAGAAAUAGUAGUA  
>N774  
GGUAGAAAGAAAUAUUAAACUCAGGGCUGAAAUCAACCA  
>N775  
CACCCCAGAGCUCUCCUGGACUAAAUCACAAACAAGAGUA  
>N776  
UACUCAAGGAGCUAAAGGGAACUGCAACCCUAUAGGUGGAA  
>N777  
UUGGAUUAACUUAACUAUAGACUGGCUUCCAAUGCUGUUAG  
>N778  
AGAAACAUCAGGAUGUUCAGACUGGUGUUACAAGUCCAACC  
>N779  
UGUAUGGCCUCUGUUCAGGACUCCAAAGUAAUCCACCUGG  
>N780  
CCCUAUCAGUAUGGUCUAAAACUUAUUAUGC UUAGUGCCCC  
>N781  
AGAGCUCACCCAAACCCAGAACUUUCAGCAAUAACAAUUUG  
>N782  
UUAAAAAAAAAAACAAACAAACUUGCCAACAUGUCUUA AUG

>N783  
UAGAAUUCUGUUUCAAAGGACUCGCCAUGUUC CCAAAGCG  
>N784  
UAUAGACACUGGCUAGCUAGACUCGUCACGUGGGCAGUUCU  
>N785  
UUUUUAUACGUUAAAUAGGACUAGAAAAGGGGAGUUCAAA  
>N786  
UCAAAAUAUACCAGGAGGGAACUGGAGGGUUGGUUCAGAGG  
>N787  
AAAACGAACACAGGAGAAGAACUCGCGCCAGCUGAACUUGG  
>N788  
GUAAUUCUUUGAAGUAGGGACUAGGCUCAGGGGUAGAAUA  
>N789  
AAGACUGCUCUACAACCUGAACUAUUGUUGGAGAAGGUGCG  
>N790  
UAGGAAUUGCCUAUGGAAGGACUCUGAACGUCUUCUAAAUU  
>N791  
UUUUUUUUUUUUUGAGAGAAACUUUACA UUCUCAGAGGAGA  
>N792  
CACAAAUCGCUGGCCAGGGGACUACCUUCCGUGGUGCUACA  
>N793  
CAACUAAUGCAUUGUAAUGAACUUGCUUGUUGUAUUAUGA  
>N794  
GGGAAGCCUAGCAACCCGGGACUCCA UUGGGUUGGGUUAU  
>N795  
CUGCAACUAAUAGAAAAGAACUGCAGAAGAGCUUCGAGGA  
>N796  
ACCACAGAAAUAUACACGGGACUCUACCCACUGCCUUGCUA  
>N797  
GCAACCCAGCGUGGUAGUGAACUUGAAAUAUUAUCAAUCA  
>N798  
AGGAUUAAAUGGCAGAGGAGACUUUCAAGAGGUGUGAGUA  
>N799  
ACAGCCAUUCCCCGCUCAGACUUCGAAUACAGUAAUUAU  
>N800  
UCACAUAAAUAAGGUUCUGAACUUCAGGGUAACAUUUAAAA  
>N801  
ACCAACCUUCAGAAUAAAGGACUUUUGUUAAGAACCUGUU  
>N802  
GUACUCACAGGGUUUCCAAAACUCACCCCACCGCCCCACCC  
>N803  
GUUUGUGUAUAUGAUGGGGGACUACAGGCUCUGGCUGUCAC  
>N804  
UAGAUUAUCACAAUGCUUAAAACUGUAGCCUCAAGGAGCACU  
>N805  
UAGCCUGUGUCUCUGGAAGGACUGAGUGGGGGGCAGGGUGU  
>N806  
UUAUUGUUAUUUCCAGAAAACUGGCCAAAUCUUGGGGGGU

>N807  
AUUUUAUCACAAUUGUCAAAAGACUUAUCAAAAACCCUAUGUA  
>N808  
CCUCACUUAGCAACAUCCGAACUGAGUGUCCAUCACUAGG  
>N809  
UAGCUGGGUCUAUAGGUAGAACUAUUUCCAAUUUUCUGAGA  
>N810  
UUGUUAGAAACUGGACCUGAACUUCAGCUACGUUGUACAAG  
>N811  
UGCCUUUGGUCACGUCGAAGACUUUCCCAUUGACCGCGAGC  
>N812  
GUCCUUUUACUUGUGGCCAAACUCCUGGGGGCUCUCCCAU  
>N813  
CUGCAGGCUGCGCGCUGAGGACUCUUCUCGCCUUCUCCCU  
>N814  
UAAUGUGGGUGAAUGUUCAGACUUAGAGCCAGGCUUUAUUAU  
>N815  
GGCUUGGUUAUAAAUUUAGAACUGGUUAUAGAAAAACAGCUA  
>N816  
UAACAAGGAACUGGGUUUGGACUUGUUCAGAAAAAAAAAAG  
>N817  
AUCCUUUUUAAAGCAAUAGACUUUUUACUACGCUGCUCUG  
>N818  
UACUGCACACGUCUGACUAAACUUCUCUCCUCUUGGAAAG  
>N819  
AGUUGCUGCACCUGCAACAGACUCUUUCCUUGUACCCUUC  
>N820  
GUUGAUUCCUUAACAUAACUACUCCACACCUUUGGAU  
>N821  
GGUGUAGAGGAGCCGCAAGGACUAAAGGAAGGAGAAACUGU  
>N822  
CACGUGGAUCCAUAACUAGACUAAACGCGGGAACGGAAUAU  
>N823  
GUGGUGGCCUUCUACCUGGAACUUUUCAGCCUCUAAGUCUG  
>N824  
UAAGGAAGCAGGUAACCCGGACUGAUACGGGGCUCAAGUCC  
>N825  
ACUCCUCCUCCUCCUCCUAAACUUUUGAUUUUAUUUUCAGG  
>N826  
CGUGAGGAUACCUUGUGUGAACUACAAGUAACGUCGGAAAC  
>N827  
AUGCUCUGAGGAAAGAAGAGACUUCAGCAUACUUCCUGUU  
>N828  
UCCUUCUUUACAAACCAAAACUAGGGCACAAGACGCAAAG  
>N829  
AUAUACCUACCAAACACAGACUCAGUGCUGAUGGGGGAAG  
>N830  
CGGCCAGAGAGUGGUUAAAACUGUUCGAGACGCAUCCA



>N831  
UCUGCCUCCCGUGUGCUGGGACUAAAGGUGUGCACCACCAC  
>N832  
CUUGUGGUUGUUAGUAAAGAACUAUUCCCACCCAGCAGAUC  
>N833  
CCCACUGAUGUUUCAGGAAAACUAAGGGAAAGAGGAGGAAG  
>N834  
AACGGUUUAUACCCCUGUGAACUCACUGGAUCUUUAAUAGC  
>N835  
CACCUCACCAGGCCCAGGAAACUGAAAAGGGGAGCCCUAGU  
>N836  
AGAUCUUUAAAUCUCUCCAAACUUUGGAAUCCCCUCUCCAA  
>N837  
GCAGUGAGCUGGGGUGAGGGACUAUUCUGGAAGUCCACAA  
>N838  
GAAAGUAAGUGGCCUGUUGGACUUGGUGAAGAAAUUUGAC  
>N839  
AGCGCACGGGCCCGUGAGGACUUGCUCUGUAGGAGCCUUG  
>N840  
UGAUGGAAGAAGAGAGCCAGACUCCUAAAGUGUCCAAUUUC  
>N841  
AUCAUAGACAAGCGCCUCAAACUUACCUGAAUCCUGACAAU  
>N842  
UACUCUACAUUUGACAUGGGACUUUCUCCUCAUUUGUGUUU  
>N843  
UAACUGCGGCUCACACACAAACUGGGUGGGAGGCACACAGG  
>N844  
AUCUGUUCUGUUGAGUGGGGACUGAGCUGUAAAUAUAUGA  
>N845  
CCCUAUAGGGGUGGCCCCAGACUUAAGUUCAAUACCACGG  
>N846  
AUGAUUAUGAUUGGAUUGGAACUGCCUCUGAAUAGUAACG  
>N847  
UUGC UUAUAUGAAGUGUAAAACUGGGGUCUAGAGAUGGGUA  
>N848  
AUGUGGAUGCUAGGAGGUGAACUAGGGCCCUUGGGGAGGGG  
>N849  
AUGGUUUGUGUACCACCCAAACUGCCCAAUCAGAAAGAGUA  
>N850  
CCCCUAGAAACCGUAUAAAAACUCACUGAAAAGGUGCUGGG  
>N851  
UGUCUGUUCACAGCAGUAAAACUCUAACUAAGACAAAGUCU  
>N852  
GCUCAUACAACCAAAGGAGGACUCGAUAAAUGGCAGCCAUC  
>N853  
CAUGGCCCCUGGUUUAUGGACUUAGUUGUAUGUUGCAGGU  
>N854  
CUGUCUUUACUGGGCCCUAGACUACGUAUCCUAAAACAUAG

>N855  
GGGAGCAAGAAUAUGAGGGAAACUUGUUUUAACAGAGAUGUG  
>N856  
CCCAAAGAGUCAGUCACAAGACUUUACUUUUAGGUAACUUA  
>N857  
CACGUGGUCGUUUUAUUAGAACUAUAAAAAUCGCCGGGCGU  
>N858  
AAUAAUAAAAGAACACUCAGACUUUCCCCACCACACACAAA  
>N859  
AUGCAAGCUGAAAAGGGGGACUAUUAGAGACAUGGUUUCA  
>N860  
UUCAUAAUGGUUAGAAGUAAACUAUGAGGGUGGGGUUUUUU  
>N861  
UGGUGGUUACAUAUGUAUGGACUGAAAGGCAUUAGCAAUGA  
>N862  
AAACUUCCCCACACACAGAGACUCUUUUCCUACCCCAAACC  
>N863  
CAGCCGGAACCCAAAGCGAGACUAACCAGCGUCCUCGGCGC  
>N864  
GGAGGAGGUGGGAGAUGGGAACUAAUCAGAAAAUAUUGUAU  
>N865  
UGGAGAUGGACACAGAAGGACUAGAAAGUGAAUGUGAUC  
>N866  
GACGACUGGGAUGAGACUGGACUCGGGUGUCGCACUCCCGG  
>N867  
AUAUACUCUUCUAAAUGUGAACUGGCUGUUUCCAGAAGG  
>N868  
UGAAAACUCUAAAUAUUAGACUCAGGGUUGUUUGUUCUGC  
>N869  
UGUCUCCUUGGUGAUUUUAAACUGAUACCCAUCGGCUUAGC  
>N870  
UGAAGAAAUGCAGAUUGGGGACUUUGGAUUAGGAAACACUA  
>N871  
CUGCAAUCCUCCCACCCAGGACUGGGUCUUAUUUAAAGGA  
>N872  
UCCAUGAAUUUUGUCACCAAACUUCCUACCAUGGUUCAAU  
>N873  
ACACACACACAUGCAAAGAGACUGAAUAUAAUAGAUAAUUU  
>N874  
AACAGAGUCAACUGAUUGGGACUGUUGGCGGUCCAUGGAC  
>N875  
UUUCUACAUAUCUUCUGCAAACUAGAUCCEAUGGACUAGGG  
>N876  
UUACUCACCCUGAUAGGGAACUCAGAGAAGACCAAAGUAU  
>N877  
GUGGAGUACAGUUGUAAAGAACUCAUUUGAGGAGAGGCCCU  
>N878  
AGAAGCCUUUAUUUAGCAAACUUGUAAUUGCAAUUCUUU

>N879  
UCCAAACCGGUUACUGUUGAACUCCUCCACAACAGUGCACC  
>N880  
AAAUGCUAGACGUGUCCUAAACUAGAAUCUGGGAUCUCCUA  
>N881  
GGAAUGUUAGAAGGGAUCAAAACUGCUGAACCCAAAGGAGGC  
>N882  
UAAUAGUGCCACUCCUAUGGACUAAUGGGGGCCAUUUCUAU  
>N883  
CUGAUAACAGUGUUGAGGGAAACUGAGCACCCCAACCCACUG  
>N884  
AUGAAAUCACUCAUUCAGAAACUCCUUGUCAAGAACCACACA  
>N885  
AAGUCAUUGGAUUGUCAUAGACUAUCCCUAUAACUGUGCU  
>N886  
AUUUUUUUUAAGCCAAUGGAAACUAUGAGCUCCUGUUAAAAA  
>N887  
GGUGUGAGUAUUUAUUGAAAACUUGUUCAAAUUUCCACUU  
>N888  
UGGACUAUGUACCGUCCUGAACUAUAAGCCAAAACAACCCC  
>N889  
UCAGUAAAACCUUUGUGUGGACUCAUAGUUUUAAAGGAUGGG  
>N890  
UUGGUAGGCUAGUACAAUGGACUCCCUCCAUAUCCUAUGC  
>N891  
UAUUUAAUGGAAAGAGAGGAAACUAGGGGAAAAAAGUAAUUAU  
>N892  
UACGGGGAUAGCCCCGGGAGACUGAGGGCGAAUGCCAAAGA  
>N893  
ACUCAUCUAUAAUCAAGGAAACUAACCCAAAUUCUAGUUUU  
>N894  
CUCCUCAAGAUACAGAACGAAACUCGGGGGCGGGGGCGGGGG  
>N895  
CAUUAUAAUGAAUUAUGGGGACUGCUCAGGACUGUCAUUUC  
>N896  
CUUAGCCCCGUAAACUGAAAACUCCAGAGACUUGUAAUUUA  
>N897  
GACCUGGGUUCGACUACAAAACUGCCCCCUGGUGGCAGCU  
>N898  
UGUGUGUUAAGAUCUUGAACUAAAACAAAGGAACUGAUG  
>N899  
GCUGAGCACCAAGACCUUGAACUUUUUUUUGUUUUGUUUA  
>N900  
GCCCAAGUUCAAUCCCCAGGACUCAUGUGAAGAAAAUAGGG  
>N901  
UUUCUAACCUAGCUAAUCUAGACUAGGCCCUUAUAGUAUAC  
>N902  
UUUAAACUUACACCCUUGAACUCCUCCGUGGGGGACCGCC

>N903  
AUGGGGUGGGGUGGGGCAGGACUUGACCCAAUAAAGAAUU  
>N904  
ACAGCCCCGAGACUCCUGAAACUGUGAGUCAAAAUACAUU  
>N905  
GCCCAUGGUUUUCUGUCUGGACUUAACCCCCACAGUUAACU  
>N906  
CUAAUCCAACUCUUCUCAAACUUAUCCACAAAUAAGAAU  
>N907  
AAAACAAAACAAAACAAAAACUCACAAAUUUUAGUCAGUG  
>N908  
UGAGAGAGAAAAGCUUAAAAACUGGAACAGCACUACAGAGG  
>N909  
CCGAGUUUUCUAGCCCCGAAACUGUGCGUGCGCGUGUGUGU  
>N910  
UCCGUUAGAGAUUUCUGUAGACUGGGAACCCACGAACUAUA  
>N911  
AGAAUACUCUGCCACUCAAAACUAAGGAGAGAGCUACCCUC  
>N912  
UGAUUCCAGGACAGCCGGGACUACAUAUGAGACUCUACC  
>N913  
AUUAUUUUGUGUCAGGAGGAACUUCUUUUCUGGCCAGUCU  
>N914  
UAUUAAGUCCCCACACCCGAACUGUACGCCUCAUAUUCAU  
>N915  
AAACCUUCGGAGGAGGAAAGACUCAUUUUUUUUUCUUA  
>N916  
CCACAAAAUUAGAGGGGAGACUGGAGUGAGUAAAACACCU  
>N917  
GCUGGGCAUAACUAUUCGAAACUGUCCCCCAUCAGGAUAC  
>N918  
AAAACAAACCUUACGUCCAAACUCCCAUUUGCCUCCUCAC  
>N919  
UAAAGGGGGUGGGGAAUAAACUAAGUUUUUUUUUAAUAG  
>N920  
CUUUCACCCCUGAAAAAGAAACUGGCCAUUUUAAAAAUGG  
>N921  
ACCAACUGCAUUUUGAUUGGACUAAAGACCCACACCCUAG  
>N922  
GUGUUUUAUACACAGCCUGAACUGUUAGAGAAUGUGUUGAU  
>N923  
AUUUAAAAGUUACCGAGGAAACUAUUUAAUUGGUACAUUUU  
>N924  
GGUGCAAUUUCUGCAUCAGACUCUAUCAGCUGCUUGUUGG  
>N925  
AAGGGGGCGACCCACUGUAAACUGCACCCGAGAUCCAUUUC  
>N926  
CCGAGGGAUUGGUAAGAAAGACUGCUUUUAUUCCCGUACUG

>N927  
UCCUGGUUUCCCCUCCGGAAACUCUCUAUCCCAUCCCCCCC  
>N928  
UGGGGGGGGGCGGUGUUAAGACUUCUUGUCCUCAAAGCC  
>N929  
AAGAUUUUUUGUUUUUGUAAAACUCAGCAACUCAAGGAUUAU  
>N930  
CCCCCAUCUUUAAAUAUAAAACUUAUUCUUGCCCAGCCUGA  
>N931  
CAAUCUGUGAACUGAAAUAACUCUCCCUUAUGUUGAUUUUG  
>N932  
GGGACCAAUAAAUAUAAAACUUCUGUUGGCAAUGGACAC  
>N933  
GCAUUUCAGGUUUUUAUAAGACUCCCAAAAAGGGUUGUGGA  
>N934  
AAUUCGGGCGGACGACACAGACUGUUUUUUAACAUGGCCUG  
>N935  
UUAUACAGCAACCCCAAAGACUCUCGGGUUGAUGCGUCCC  
>N936  
ACUGACAUAUAAAGGGUAUAAACUUGAUAGUAGCGGCUCUCC  
>N937  
CAUGUAUGAAAUUCUCAAAAACUAUUUUUUGGGGGGGUCUG  
>N938  
GCCAGGUGUUAAGAAAGCAAACUCACUGUGCGGUACGUGGG  
>N939  
CGGCGAGAGGUACGUCUGAGACUUCGAGAGCCGGGCUCUGA  
>N940  
CCUGCCACACAGGCAUUUGAACUGCAGACGCAGAAGUAUUG  
>N941  
AAUUGGAAAGAAGAAGUCAAAACUAUCACUAUUUGCAGAUGA  
>N942  
GAAAACCACACCUGAUGCAAACUGCAAGAGGCUUUAUUAUC  
>N943  
UAGUGAGCGGAAGGCAAGAGACUCGGUAUUUGUGUGUGUGU  
>N944  
AAAGAGGGAACAACCAUAGAACUGACAUAUUAAAUAAGAAUA  
>N945  
UUUUUCGUUGGUGGGUCUAGACUGGUGUGACUGCUGUAAGG  
>N946  
UUAUUAAUAGAAAAGGGGGAACUGUGGGAAGCCGCCCCAC  
>N947  
GGGCUUUUAGUAUUGUUGAGACUGCUAUUGUUUAUGGGGAA  
>N948  
UUUAAGAGGUCGGAAUAAAACUGGAAAUUAGUAAAAAUAC  
>N949  
UUUUGAAGUCUUCACCACAAACUGCGAAAGUGACGGCUCAG  
>N950  
UAACUUGCGGUGAUUGAAAACUGCCCCGAAUGAGGAUGUU

>N951  
UAAUAGGCCCAACGGGUGGAAACUGUAAGUUUUAUACAACAU  
>N952  
AUCUGGGGUGUUUCAGUAAAACUCCGUGGGAGGAAAAACGC  
>N953  
CUCAUGGCGUUGUUGAGAAAACUAGGGGCCGGCCACAGGGU  
>N954  
AUUGUUUGCUUUACACAGGGACUCACGUCUUUCAGACAGGC  
>N955  
GUACAAGAAAGGAAGGCAGGACUCAAGGACUCACACAUGUA  
>N956  
AUUUGCCGUGAUGUGAGGAGACUCCGCUGCAAGCUCCUAUC  
>N957  
UCCCCUUGUGGGUAAUGGGACUCCAAUCCAUGUGUACCC  
>N958  
GGAAUGGUGUGGGCUUUUGAACUACUAAUCCAGCCCCUAG  
>N959  
ACAAAAAUCCCUAUGUUGAACUAAUUGCAUGGUUGUAAAC  
>N960  
UUUAUUCUGUAAUAUAAAAACUUCAUGGGAUUAUUAUCAU  
>N961  
CCAUGUCAAUAGAAUAAAAACUAACGCUUAUCAUACAUCA  
>N962  
GCGCCGCGCACACAGUAGGAAACUCGCUGGGUUCCUUAACC  
>N963  
UAGCUCUUACGCAGCCUCAGACUUACAACACAUGUUCUAGC  
>N964  
UAGUGUGGGCAAAAUACAAAACUGGGAAAAAUUCUCUAUA  
>N965  
CUUGAACCGCCCCAACUGGGACUACAACACCGCGGAAGGUA  
>N966  
AUUCUACUACUUUAAAGGGAACUUAUAUAUAUUUGAGCAA  
>N967  
GUUUUCCCCACUUAUCUGAACUAAAAAAAAAAAAAAAAAAAA  
>N968  
UUGAUUUGGAACUUUAAGAAACUUGGGGCUGCAAGUAGGAG  
>N969  
AUAAGAGAGGUUGCCAUGGAAACUAGAAGAGAAGCCAGAACG  
>N970  
AGUGCAGGCUCGCAAGAGAAACUCAUGACCCAGUAAUUGAG  
>N971  
GGCGCACACAAAAAGGAAAAACUACACUGCCCAGAAAGCAA  
>N972  
GUGUGUAUGAAUGUGGUGAAACUCAACGGGUCACAAUCAA  
>N973  
UCUCCUCCCCACCUCCACGGACUCCCCCAUUCUCAUCCACA  
>N974  
CGCAGAGAGGCAGUGCGCAGACUCAUUCAUUCCCCGAGAGG

>N975  
UUGAUCCAUCACUUUUUGGAACUAUUCAGGGGAGUUUCUG  
>N976  
UACUCAAAAGACAUAUUUCAGACUGUAAGAUGAGUCAAAAGA  
>N977  
UAUGAGAGCUAGGGAUCAAAAACUCACACCCCAUACUUGUG  
>N978  
AGUCAUUGGCAGAUAGGAAGACUGGAGAGUCUCCCCAUCA  
>N979  
GGCAUAAGAUGGGCUCCAGGACUCCGCAGAGGGCAGGCUGC  
>N980  
UCUGAGAGUAAUAGCUAGGGACUAUCCCACGUGUUCUCAGU  
>N981  
CAGCGGGAUGCUGUUUGGGACUCCCCUGAGCCGGGUUGGU  
>N982  
UCACUACCCCUACCACCAGACUGUCUAUUGAUUUGUUCUC  
>N983  
CAGUCCUGGCACCUUUGGGACUGCCGCCACACCCGCUCCC  
>N984  
CUGGUAACUCCUCCCCAAACUUGAAAGAAAGAAAGAAAG  
>N985  
UACCACUGAGUUAAUUUAAAACUUAAGCUCCCCUUUUUUGG  
>N986  
UCUGAGGCUGAACCCUCAGACUUAAGAGGCUAAAGCAGGGG  
>N987  
UCUGAAGACAAGCGAAGGAGACUAGCCAAUAAUUAUCCC  
>N988  
GGGUCACAACAGAUGAGGAACUACAUAAGGGUCUCAGC  
>N989  
UGUGCGCCCUAGCUGCUUGGACUGGAAGGGCCCUUAAAAC  
>N990  
AUAUGGGCAACACAAAUUGGACUUGGUGGAGUUUUUUUGG  
>N991  
UUUUCUUGUACAACACGCAAACUUAUGACGAUUGCUGUAUA  
>N992  
UUUUUGCCACCUUGACAAAAACUAUUGACACCCGGGAGGGG  
>N993  
UAGGGGAAAAAAAAACCUAAACUGUUUCCUUCCCAGCUUU  
>N994  
GGGUUAUUUGAUUUUCUGGACUCCACCUUCUUGAGUUCUU  
>N995  
UGAUUAAUUGUAGAUCUAGACUAAAGGGUAAAGCCUCCCA  
>N996  
UAAAUAUGCCGCGGGAUGGACUUUACCUGUCCACUUAAG  
>N997  
CAAACGAGUCCUGCUAGGGACUUCGUAAUUGGCUGACACU  
>N998  
UCCUCCAGGGAAGCUUGAGGACUCGGCCAAUGCUGACGGCC

>N999  
AGGGAGGGGGAGGGGGGAGGACUAAGGGCACUUUGGGGGUC  
>N1000  
UCACAAAGGCACACCCCUAGACUGGAAAUACACCCUUAUA  
>N1001  
GGAUAGCCGGGGCUUCAUAGACUUUAUCUAAAAAACCAA  
>N1002  
AAUCACCACUCCGCCGUCGAAACUUCACCCCGAGUACCGAUG  
>N1003  
AAGACUAUGGUGAAGCGGAAACUGCUGGGGGUGGGGGGUGG  
>N1004  
GUAGACCAGGCUGGCUCCAAACUAUGAGAUCUGUUCGCCCC  
>N1005  
CGUUUGGGCUGGUGUCGGAACUGCAGUAUCAUUUCCUUU  
>N1006  
AGAGGGCAGAGUCCGGGCGGACUCUGGUGGACCCGCCCAA  
>N1007  
UCCAUGCCUCAAUUGUAGGGAACUGCCAGGGUGGGGAGGCAG  
>N1008  
AGGUGUUGCAUUUUGGGAGAACUGAAUGAACCCAAAUCUAU  
>N1009  
AAUCCUUUCAAAUGUUAUGAACUGUAGCAGCAGAUUCAUAG  
>N1010  
GUAUCCAUAUAUAAACAAACUUAAGACAAAAACCACAU  
>N1011  
ACACUCAUAGUGGGGAUGGAACUCUAAUCUACGCUCUAUUAU  
>N1012  
AUCUUGGGGAUGCAUAAUAAACUAAGGGUUGAGGCUUACUA  
>N1013  
UAGACUAGCGCGGUAUUGGAACUUGGGAAUGAAAGAUUAAU  
>N1014  
GAUGUGUGAUAAAGAAACUAGACUUUUUCUAUAGACAGGCUG  
>N1015  
UUGGGAAGAGCUGAGAAAGGACUAGGGAUUUUUUUAAAAUU  
>N1016  
AGGCAGGGGGCAAAGCUAAGACUGACGUAGGAAGAACCCCC  
>N1017  
AAGGAAUGACACGUACACAGACUUAUGUGUAUAUUUAUAUG  
>N1018  
GUUGUCAUGUCUCCUCCAAACUAAAAGAGCUUAUCACUAU  
>N1019  
AUCAUUAGAGGGAAACGCGAACUUGUCCCGGGUGACAGUGG  
>N1020  
CAGAAAAGACUGAAUCAUAGACUCCUAAAAGAGAGAUUUGG  
>N1021  
AAGGAGACUGAGUUCAGGAGACUUUAGUGAUUGGAGGGGGA  
>N1022  
AUUUUCUAAGGAACCGCCAGACUGAUUUCAGAGUGGUUA



>N1023  
UGCACCCCGUGGGGGAGGAGACUAUCGCCUAGACUAUUUC  
>N1024  
ACGUUUGUJCAACAAUAAAAACUCUUUUUAUUGGAGGAUGAG  
>N1025  
GACUAGACUAUAGACUAUAGACUAUAGACUAUAGACUAUAG  
>N1026  
GUGUCUUUUGCCUUGCAGAAACUUUGGAGUUUCAUUAGGUC  
>N1027  
AUUUUCUGAGGAACCGCCAGACUGAUUUCAGAGUGGUUGU  
>N1028  
GUUGUGUCGGGGUGCCUAGGACUAGGUGGGGUGGGAGUGCU  
>N1029  
ACCAAUAGAAACAAAAAGAACUGUACAAAGAAUCUACCAA  
>N1030  
AGAGAGACUAACCACAGAAACUGAGGAAAUUCACAAAAUC  
>N1031  
AUAUGGCUGGCCUGAUUAAACUACCUGAUUGAUUAUCAA  
>N1032  
UUCUUUGAAGGUCUGAUAGAACUCUGCACUAAACCCAUCUG  
>N1033  
ACCUGGAGUCCUAAUCAGAAACUCCUUGUAGACUGCUUUCU  
>N1034  
AAAUUAGCUAGUAGGAUGAAACUJCCAGGUAUAUACCCAA  
>N1035  
AGCAGAGACAAUAAUAUGGACUACACCACCAAGGACCUCU  
>N1036  
UUUACAUGAAGAAUAGAGAACUCAAAUGAUUUGGCCUAAG  
>N1037  
GUUUUUUUAUACUGUCUAAGACUCACACUAACUAUUUGUAC  
>N1038  
GGAGUGUGUGUGUGGGGGGACUUUUGGGAUAGCAUUGGAA  
>N1039  
AAACAGGACCUUCCCAGAAACUGUGUUGCUUUGGCCUGUC  
>N1040  
CACAGUAAGCUUAAGGUGAGACUACACACAGGGCCUAUAUG  
>N1041  
ACGGAAACUCACCUCUGGAACUUUGGCAUUCUCAUAACCC  
>N1042  
CCUUUCUAACUAUAUGAAGAACUGAGUUGGAAUUUUGAUGA  
>N1043  
GCUUGCUGAAAAUCCCUGGACUUUAAUUGCACUUUCUAAA  
>N1044  
AUAAAACCAGAGACACUGAAACUUAUAGAGGAGAAAGUGGG  
>N1045  
UGCACUGAAAGGAAUAAAACUGUAAUUCAUGUAAUGUAU  
>N1046  
CGUAGGAGCGAUCCCAAAGACUJCAACCCCCACAGUCCUG

>N1047  
AAGCAGGGAGAACAGAGAGGACUCUAGCUGCUUGCAGAGAC  
>N1048  
CCCACAGGGCAGCCUCGGGGACUGCAGUGGCUGGAAUGCUU  
>N1049  
AACCUAGAAGGACUCAGGAGACUCAAAUUGUGUUGAAAAGC  
>N1050  
UUGUCUUUGAAAAGACAAAGACUGAAGUCAUUGUCACCCUU  
>N1051  
UGUGAGACAGAAGAUGUUGGACUCCCCAGAAACAUUUUUA  
>N1052  
AAUUGUUCUUUUGGAAAAGAACUGCAGGGACAAAAUGGAG  
>N1053  
CCUAUGGUGAGUGGAAAAAAACUUCUGCCAGGAGGCAGGUU  
>N1054  
ACUCAUUAAGAAAACACAAAACUUAGUGGUGCAAUAGAUC  
>N1055  
UUUAUUCGUAAUAGCCAGAAACUGGGAAGCAACCUAGAUAU  
>N1056  
GGUGCAUCCUCAAAGGGGAACUGCUGCUACCUGCCUGCA  
>N1057  
AUCCUAUCAGAUCACCAUGGACUAAGGCUGAUCUCAAUA  
>N1058  
AGACUGGCUACACAAACAGGACUCAACAUUUUCCUGCUUGC  
>N1059  
CUUGC UCCAGCCACAUGAACUGUUGCCAUGGCAGCAAGU  
>N1060  
UUUGGAUGCCUGAUUUAAAGACUUUGCGCCACACUGCGCU  
>N1061  
AGACAGAUCUAACUCACCAAACUCUAGUCUGUACCACACAG  
>N1062  
UUAAAACUCUUUCCUUCUAAACUCUAUUAUUCUUCAGACUG  
>N1063  
GAAUCCUGAUCUUUCCAAGACUUUUAUCAUGAAUGGAUGU  
>N1064  
UUACCAUGUACACUGAAAGAACUCGUCCCAUAGACAUGGUA  
>N1065  
CCUUGAACUACCUUUACAAAACUUUAAAAGCAUGCUCCTCA  
>N1066  
GAGGCCAUUGGACACACAAACUUUAUAUGCCCCAGAACAG  
>N1067  
UUUUAUUAUAAAAGAUUAGACUCUUAUGGCUUUGAGUACU  
>N1068  
CUAGGCUCAAGAAAGUCAAAAACUGAUACAGGAAAAUCACUG  
>N1069  
CCACAUGCUCUCCUACAUAGACUUGUCUCAGUGAUCCCAAG  
>N1070  
GGGUAAAUUUUUUUCCAAAACUGGUGAUCAUGUCAGUCUU

>N1071  
UAGAGUUUUUACAAACUGAAACUAAGUAACAUUUGUGAGAG  
>N1072  
AACCAAGGACACAUAUAGCAGACUUAUUUGUAAGAGCCAGAA  
>N1073  
AGGAAAUUUUUGGAGGGGAAACUAAGAAAGGGGAUAACGUU  
>N1074  
AAGUCCUGAAGGUAUGUGGAACUUAGGCACGGUGAAAAACA  
>N1075  
AACAAUGAAUUUGAGUGAAGACUUGAAAGCUAAGAGGACAU  
>N1076  
UAAACCUCUCUAUGUGGAGGACUUUUACUUCUCCCAAUUU  
>N1077  
GCUCUUUUGGAGUUCUCUGGACUGUAUCUUGGGUAUUCUGG  
>N1078  
UAAAAUAUGCACAUAUAAAACUAUUUCCUCUAGGCUCACA  
>N1079  
AAUCCCACCAACAAUGGAGGACUAUUUCUCUUUCACCACAU  
>N1080  
CAGCAACUGUAAGCAGCAGAACUAGUAUGUUGC UUAAAUG  
>N1081  
UGAUUACCAGGAGAAAACAGACUCUAGAGUAGUGUAGUAGU  
>N1082  
UUUACAAAAAUGCAUGGAAACUAUGAAUAUAGAACCAUGA  
>N1083  
GGGAUCCAUUUGGCAGAAAAACUGAAAACAGAGCUAUUUCA  
>N1084  
UGAGCAGAUUUUAAGAUAAACUCAUGAACCUUAGAGAACU  
>N1085  
AAUAAAGAAAGAAUUAAAGACUUUUUAGAGUUUAAUGAAA  
>N1086  
UUAUUCUGCUGUAAAAGAAACUUUUUUGAUUAACAGUAAG  
>N1087  
AGUGAUAAAAGUUAAAAAGAACUGUGGCCAAUAUGGGCCUG  
>N1088  
CUACAAAACUCGGGACAGAAACUCCAGGCAAAAACAGGAAG  
>N1089  
UAAAGAUCUGUAUGAUAGAACUUCAAGUUCCGAGGAAAG  
>N1090  
UGACAUUCAUUGAGUUUGAAACUUGAAUAAAAAAUUAGGG  
>N1091  
UUGAAUCUUGGGUAUUCUGAACUAUUGGGCUAAUAUCCACU  
>N1092  
ACGGGGGAUACUAAGUAAGACUUCUACUCAGGAAGUCAC  
>N1093  
AGGAAAAGGGCUGGACAAGGACUGAUACAUAGACAAUAGUU  
>N1094  
AACACAACAAAGCCCAGGAACUGAUGGCCUAGUGCAGAG

>N1095  
ACCCUAUAUUAGGAAUAUGAACUAGCCAGUACCCCCUGAGC  
>N1096  
UGAUGAACACACUAAGUGAAACUGCCAGGGCAAUGUAAAG  
>N1097  
UGUAAAUCAACAUCCAGAGAACUUAUAUUUCGGAUAGCCUG  
>N1098  
GCAACAUCUGAUCCAAAAAACUCAGAGCAUCUUGUGCCAG  
>N1099  
CCUCUCCAUCUUGGGCACGAACUCAGCAGGCCCUAGAACAC  
>N1100  
AUACACACCCAAAAAGCAAGACUCAGAUUUAAAAUCAUAUC  
>N1101  
AUAGAUAAAGCCCUAGCCAGACUUUCUAAAGGGCACAAGGA  
>N1102  
CACCACUGCUCGUCAGAAGAACUGGCCUGGAACUCUCAGGA  
>N1103  
UAAAAGCCAUUAUGGUCCUGGACUUUGACUGAUUGGGAGACU  
>N1104  
GGAGCUGGAAGAACAUAUAGACUUCAGGGGACUAAGUAGGA  
>N1105  
UGAAAAGAAUGAAUUGUAAACUCCUACCUUGACUAUAGUG  
>N1106  
GUUCUUGUGAGCUCAGCAAAACUAUACUUCUAUCCAAUUUU  
>N1107  
GUAAGCCAGCCUGGCUUUGAACUUGAAAUCCUCCUGUUUCA  
>N1108  
GCUAGUGCAGACUGGAAGGGACUUGUGACCCUGGUCAGGCC  
>N1109  
UCUUUCUCCAGUGAUUACAGACUAUCUCCACAGAGGCUGUC  
>N1110  
CAGAUAGGGUUAACAACUGAACUCCCUCAUUACUAUUAACA  
>N1111  
CUAGUAGGUCUAAGUUGAAAACUGUUUGGUCCUUGUAAACU  
>N1112  
AAUCCACAGAUCUUUUCAGACUCUCAGUUUCGAUAUUUAU  
>N1113  
CCUUUUAAUGUUUCAUCAGACUUGCUUCUCCACAAAGGCC  
>N1114  
UUCUUUCAGAUAAAUUAAAACUCUCGUGUCCUGGGGCCUA  
>N1115  
AAAUGCAAAGGAAGCAAGGACUCUCAUUUUUGUUUCCGU  
>N1116  
UCUUAGCAACCUGAAGUCAGACUUCUAUAAAACAAACAAA  
>N1117  
GGCUUUUAUUUGGUUGGAGACUUUUAAUGACCGAUUCUUU  
>N1118  
UGUUUCAACACUCAGGUAGGACUCUAGAAAAGAGCAUGAAU

>N1119  
 GAAAAAAGAGUGGAGCAGAGACUGAAAAGAAAGCCAUC CAG  
 >N1120  
 AGGCUUUUAUACCAGCAAUGAACUGCUCUAUCCUAUGGUUAC  
 >N1121  
 UUUUGAUAGGGGACAGGAAAACUGAAAAUGAUGCAAUACA  
 >N1122  
 AUUUCUUUAGGGGAUAUGGGACUGUUUAGAAGGUCAACUUG  
 >N1123  
 UCAUCACUGCAAGGGGGAGGACUAUUAUUAUAAUAGGAAAA  
 >N1124  
 UCAGAGCAAUAGUAAUAAAAACUGCAUGGCAUUCGCAUAAA  
 >N1125  
 UUGGUAGAACA AUAGUGAAAACUAUCCCAAAGUUUAAGAGU  
 >N1126  
 AGCUUGGUUUUGUUUUUAAAACUGCAUGCUGCAAACUGUA  
 >N1127  
 UUUUAUCAGUGGUAAUAAAGACUUGUAAAGUUCUUUCCUUA  
 >N1128  
 AUGAGAAACC UAAUGCUGAGACUGAAGCCUCUGGAUUCACC  
 >N1129  
 ACACACUUUUUAUAAUAUGGACUUCUAAAUCAUUA AAAAGU  
 >N1130  
 AACAUUAAAAGAAGGGUAGAACUGGAAA UACUGGGGGCUU

**Supporting Information S4. The benchmark dataset  $S_{\xi=20}(m^5C)$  for  $m^5C$  modification in RNA.** It contains 120 positive samples whose centers can be  $m^5C$  modified as confirmed by experiments, and 120 negative samples whose centers cannot be  $m^5C$  modified. All the sequences included are 41-nt long with the cytosine (C) located at the center.

**I. Positive subset  $S_{\xi=20}^+(m^5C)$**

>P1  
 CGCCUCCCACGCGGGAGACC CGGGUUCAAUUCCCGGCCAAU  
 >P2  
 CCGGGUUCAAUUCCCGGCCA CUGCACGUGGUUGUUUUUCAC  
 >P3  
 GGCCGUGGGUGUGUAGAGGC CUUGGUGGUGCAGUGGUAGAA  
 >P4  
 GUGCAGUGGUAGAAUUCUCG CUCCCACGUGGGAGACCCGG  
 >P5  
 UGACUGCAGAUCAAGAGGUC CCGGUUCAAUCCGGGUGCC  
 >P6  
 GCUGAAGGCAUUCAAGGUU CCGGGUUCGAGUCCCGGCGGA

>P7  
AGAUGUUGGUGGUAGUAGCA<sup>C</sup>AUAAUUCUAAAGAGAACUUCA  
>P8  
AGCCAGGGCUGGGCCCGGG<sup>C</sup>AGAGCCGCCGCAGGUGCAGA  
>P9  
CUGCGGUGAGUCUUGAAGCC<sup>C</sup>AGGGCUGGGCCCGGGCAGAG  
>P10  
UAUUUGAUCGGAUCGUGACC<sup>C</sup>CAGCCCCGCCGGGCCGACCC  
>P11  
CGCUGUGGUCCCCGAGGUCC<sup>C</sup>GGAGCUGGCCUCGCGGGGCC  
>P12  
GAGACUCUAAUCUCAGGGU<sup>C</sup>GUGGGUUCGAGCCCCACGUU  
>P13  
AGACGCCAGUAAUCAGUGCC<sup>C</sup>GGCUAGCUCAGUCGGUAGAG  
>P14  
GGUUCGAAUCCGAGUCACGG<sup>C</sup>AGGUGGUUCUAAUUGCUGG  
>P15  
UGCUGUUGGCCGCAGCAAC<sup>C</sup>UCGGUUCGAAUCCGAGUCAC  
>P16  
GCGCCGCCUGGUUAGUGGCU<sup>C</sup>GCCGUGAUCGUUAGUGGUU  
>P17  
GCCUCACACGCGAAAGGUCC<sup>C</sup>CGGUUCGAAACUGGGCGGAA  
>P18  
CAGGUUCCGCCUGUGGUUUC<sup>C</sup>GUAGUGUAGUGGUUAUCACG  
>P19  
AGCGUGCUGGGCCAUAAACC<sup>C</sup>AGAGGUCGAUGGAUCGAAAC  
>P20  
GUCGAUGGAUCGAAACCAUC<sup>C</sup>UCUGCUAUCGGAGUUUUUUC  
>P21  
GUCGCAGUCUCCCCUGGAGG<sup>C</sup>GUGGGUUCGAAUCCCACUCC  
>P22  
AGUGCCCUUGCCGAGAGCGG<sup>C</sup>UCGUUGGUCUAGGGGUAUGA  
>P23  
CUUCGGGAGCGCCCGGAUAG<sup>C</sup>UCAGUCGGUAGAGCAUCAGA  
>P24  
UUAGUACUUGGAUGGGAGAC<sup>C</sup>GCCUGGGAAUACCUGGUGCU  
>P25  
AACACGCCAGAUCUCGGAAA<sup>C</sup>UAAGCAGGGUCGGGCCUGGU  
>P26  
UGGUCUUGUAAACCAGGGGU<sup>C</sup>GCGAGUUCGAUCCUCGCUGG  
>P27  
GAAGCUAAGCAGGGUCGGGC<sup>C</sup>UGGUUAGUACUUGGACGGGA  
>P28  
UGGCCGAGUGGUCUAAGGCG<sup>C</sup>CAGACUCAAGGUAAGCACCU  
>P29  
CCAUACCACCUGAACGCGC<sup>C</sup>CAAUCUCGUCUGAUCUCGGA  
>P30  
AUCUCUGUCUACGGCCAUAC<sup>C</sup>ACCCUGAACGCGCCCAAUCU

>P31  
CUGCUUUACACGCAGAAGGUCCUGGGUUCAAGCCCCAGUGG  
>P32  
AAUCCAAUGGGGUCUCCCCGCGCAGGUUCGAACCCUGCUCG  
>P33  
CUGCUGCCGUGAUCGUUAGCGGUUAGUAGUCUGCGUUGUG  
>P34  
GUGGAACCAUGAGAUGUUACCUAGCGUUUUGUGAGCCAGGU  
>P35  
AAGGCGUUGGACUUAAGAUCCAAUGGAUUCAUAUCCGCGUG  
>P36  
AAUAGCUCAGUUGGGAGAGCGUUAGACUGAAGAUCUAAAG  
>P37  
GGUUUGGGUCCGAGAGGUCCCGGGUUCAAAUCCCGGACGAG  
>P38  
GUGCCUCUCAUGUACAAGGCCCUGAGUUUGACUCCCAGCAC  
>P39  
AAGGCGUUGGACUCGAAAUCCAAUGGGGUUUCCCCGCACAG  
>P40  
CCCGACGGGGAGGUGUGUAGCUGCACUUUUUUGGCGACAGU  
>P41  
CUGCGCGAGCCACAGCCCAGCAGGACCUCGUGGCGCAACGG  
>P42  
AACGGUAGCGCGUCUGACUCCAGAUCAGAAGGCUGCGUGUU  
>P43  
UGC UUUGCAUGUAUGAGGCCCGGGUUCGAUCCCCGGCAUC  
>P44  
CCCGACGGGGAGGCCAAGUACGUUUUUACCAUUCUCCGUA  
>P45  
CGUAACGGCUGCCGAAUAGCUCAGUUGGGAGAGCGUUAGA  
>P46  
AGGUGGCCCGGGUUCGACUCCGGUAUGGGAACGCUUCCUU  
>P47  
UGGUCUAGCGGUUAGGAUUCUGGUUUUCACCCAGGUGGCC  
>P48  
UGGUUUUCACCCAGGCGGCCCGGGUUCGACUCCCGGUGUGG  
>P49  
CCGCGGAGGUCAGACUGGGCAGGAGAUGCCGUGGACCCCG  
>P50  
UAAGAGUAUCUGUAUCGCGGCUCGUUGGUCUAGGGGUAUGA  
>P51  
AUUUGUGGACAUCUAGGUUGCUGGUUCGAUCCGGCUCG  
>P52  
GUAGAGCGGAGGACUGUAGCUGUAGAAACAUUUGUGGACA  
>P53  
CAGUGUGCAUCCUUCGAUAGCUCAGCUGGUAGAGCGGAGGA  
>P54  
UGACUACGGAUCAGAAGAUUCAGGUUCGACUCCUGGCUGG

>P55  
GGGAUCGCGCCUGUGAAUAGCCACUGCACUCCAGCCUGGGC  
>P56  
CUGGGCAACAUAGCGAGACC CGUCUCUUUGAACAAUAAA  
>P57  
GGUGC AAAUAACGCCAAGGU CGCGGGUUCGAUCCCCGUACG  
>P58  
AACGGUUACUUGUCAUCUCC ACAUGGUCUAGCGGUUAGGA  
>P59  
GGUUCGAAUCCGAGUCACGG CAUUGUGGGAACAAUGGCACG  
>P60  
GUAUAGUGGUUAGUACUCUG CGUUGUGGCCGCAGCAACCUC  
>P61  
GGACUCUGAAUCCAGCGAUC CGAGUUCAAAUCUCGGUGGAA  
>P62  
CCGAGGCCGCCAGAGCCCU CCGGGGAGACCCGAGGCCGC  
>P63  
CAGUCGGUAGAGCAUGAGAC CUUAAUCUCAGGGUCGUGGG  
>P64  
AACAUAUUGCAGCUGGGUAG CGUGGCCGAGCGGUCUAAGGC  
>P65  
GGCCCGGUUCGAUCCCCGG CAAUGCAGCAGCUGAAAGCU  
>P66  
AUUCUCGCCUGCCAUGC GGG CGGCCGGGCUUCGAUCCUGG  
>P67  
UGUCUAGUAAACAGGAGAUC CUGGGUUCGAAUCCAGCGGU  
>P68  
UGGUAUAGUGGUAAGCAUAG CUGCCUCCAAGCAGUUGACC  
>P69  
GACUCCAGAU CAGAAGGUUG CGUGUUCAAGUCACGUCGGGG  
>P70  
CUUAAGAAGCCAGCAGGUCC CAUGGUGUAAUGGUUAGCACU  
>P71  
UCCCAUGGUGUAAUGGUUAG CACUCUGGACUUUGAAUCCAG  
>P72  
AAUCCCAGCGGUGCCUCAAC CGAGCGUCCAAGCUCUUUCCA  
>P73  
AUUCUCAAAACUUUAAAUGGG CAAGAAGCCCAGCUAGCUCAG  
>P74  
CAGUGCGAGCGGAGCAAUGC CGAGGUUGUGAGUUCGAUCCU  
>P75  
GGUCACGACCUCAGGCUUU CAAUCUGAGGGUCCAGGGUUC  
>P76  
AGGCUUUCAAUCUGAGGGUC CAGGGUUCAUAUCCUGUUCA  
>P77  
CUCUUCGAAUGCACUUGC GG CCGGGUCCUCCAGGGCUA  
>P78  
GUGGUCUAGUGGUUAGGAUU CAGUGCUCUCUCAUAAAAUAA



>P79  
AGCACUCUGGACUCUGAAUC**C**AGCGAUCUGAGUCACGGCAC  
>P80  
AAGCGGUUACCUCCUCAUGC**C**GGACUUUCUAUCUGUCCAUC  
>P81  
AGUUCUUUAAUUGAAACAAG**C**AACCUGUCUGGGUUGUUCGA  
>P82  
AGCAACCUGUCUGGGUUGUU**C**GAGACCCGCGGGCGCUCUCC  
>P83  
AACCUCUGGGCUGGCUUUAG**C**UCAGCGGUACUUCGCGUGU  
>P84  
CUUUAGCUCAGCGGUACUU**C**GCGUGUCAUCAAACCACCUC  
>P85  
AGUGGUUAUCACGUUCGCCU**C**ACACGCGAAAGGUCCCCGGU  
>P86  
GAUGUAGCUCAGUGGUAGAG**C**GCAUGC UUUGCAUGUAUGAG  
>P87  
AGUUAGAAUACAGACAUGGC**C**GCCCGGCUAGCUCAGUCGGU  
>P88  
AGGACUGUAGGCUCAUUAAG**C**AAGGUAUCCUUAGGUCGCUG  
>P89  
AGCAAGCCCUCUUAGCGCAG**C**UGGCAGCGGUCAGUCUCAU  
>P90  
AGUCUCAUAAUCUGAAGGUC**C**UGAGUUCAAGCCUCAGAGAG  
>P91  
UCGCGGGUUCGAUCCCCGUA**C**UGGCCAGACGUGACUUUUUA  
>P92  
AGAAGAUUCUAGGUUCGACU**C**CUGGCUGGCUCGGGUGUUAA  
>P93  
AGGAAAUGCUAGUUCAGCUU**C**AGGUUCCAUGGUGUAAUGGU  
>P94  
AAUCCAUUGUGCUCUGCACG**C**GUGGGUUCGAAUCCACCUU  
>P95  
CAGACUCAAGUUGCUCUUC**C**CAGGUUUGGGGCUUCUGGUC  
>P96  
GUGGUCUAAGGCGCCAGACU**C**AAGUUGCUCUUC**C**CAGGUU  
>P97  
ACUGCUUCCUGUGUUCGGGU**C**UUCUGGUCUCCGUAUGGAGG  
>P98  
AAAGGUCCCUGGAUCAAAAC**C**AGGCGGAAACAAGUGGUUAC  
>P99  
UCAAUUCUCACUCCACCAG**C**AGGGUUGUUUCCGUAGUGUA  
>P100  
GUUAGCUCAGUCGGCUAGAG**C**GUGGUGC UAAUAACGCCAAG  
>P101  
AUCCUGGGUUCGAAUCCAG**C**GGGGCCUUGAUUUCUGUACC  
>P102  
UGGCUUAGCUGGUUAAAGCG**C**CUGUCUAGUAAACAGGAGAU

>P103  
 GGAUGGCCGAGUGGUUAAGGCGUUGGACUUAAGAUCCAAUG  
 >P104  
 AAAAGAAGAAGCUUUGUAACCGUUGGUUUCGUAAGUGUAGU  
 >P105  
 CCCAGCGGGGCCUUGGUUGGCAAGGUCAGUGUGCCUUUCUG  
 >P106  
 AAGCCAACAGAACUCUCAUGCGGUCAGGGGGUGUAGCUCAG  
 >P107  
 UGAGGCCCGGGUUCGAUCCCGGCACCUCCAAAUGGUGGU  
 >P108  
 ACCUCCAAGUGAUGGUUUCUCUGGCAGUUCUCAAGCGAC  
 >P109  
 CGAUCCCCGACACCUCCAAGCGAUGGUUUUGCUCUGGUAGU  
 >P110  
 CAAUCCCCGGCACCUCCAUUCUUUUUGC UUUUAAUUUUUUU  
 >P111  
 UGUCCCAGGUGUCAGGAUGGCGAGUGGUCUAAGGCGCCAG  
 >P112  
 UGAAGGUCCUGAGUUCGAACUCAGAGGGGGCAAGGCGUCU  
 >P113  
 GAACGCGCCGAUCUGGUCUCAUCUCGGAAGCUAAGCAGGG  
 >P114  
 GUCAGUUACAGAUCGAACUCUUGUUCUACUCUUUCCCCC  
 >P115  
 AUUACACUGUCCUCCUAUGAUGGGUGUAUGGCUCAGGGGU  
 >P116  
 AGGGGACGCCGACACACGUACACGUCCCUUCGAUAGCUCAG  
 >P117  
 UUAGGUCGCUGGUUCGAUUCGGCUCGAAGGAGAGACACCC  
 >P118  
 UAUGUAUACAUGUGCCAUGC CGAUCUCGUCUGAUCUCGGA  
 >P119  
 AAAACUAAAACUUACAGUCAGAGGUUCAAUUCCUCUUCU  
 >P120  
 AGAACUGCUAACUCAUGCCC CAUGUCUAACAACAUGGCUU

## II. Negative subset $\mathbb{S}_{\xi=20}^{-}(\text{m}^5\text{C})$

>N1  
 GGGAGUGGGAACAGGAUUUGCAAGACUCCUAGUACC UAAA  
 >N2  
 GAAAUGGCCUCAUUUGAUAA CUAGUAGGUUUUACACAGUGU  
 >N3  
 GGGCAGCCUCCUUCUUGUCU CUGUUGUUGAGGAGUGGAAUG  
 >N4  
 UCUUCAGGGUUUUCUAGGAC CAAGGUGACA UUCUACGAGG  
 >N5

AAGAGAUAGGCUCUCACCUGCCUAAGGGCAGCAUCUUGUUU  
>N6  
CGUGGAAAGGGAUUCAGAGACAGAGUCAAGAGAUGAUAGCA  
>N7  
GGUGGUUCUAGUGAAGGCAGCAGCAAAGGGGGUAGAGGAGC  
>N8  
GAUAAAUGCUGGGCCCAGGGCUGGGCAUAGCCUGCUGCACU  
>N9  
CACUGGGUGUGCUGUAACAGCAAGGUUCAUCUGACUAUGUU  
>N10  
GAAACAUUACCCCUCUUUCCGCACCAACGAUCUGCUUGU  
>N11  
CUUUCUAGGGAAUAAGAUACUGUUUUUACACAGGCAAAGG  
>N12  
AAACCUUCUGUGGGACAGGCCCUCCACCCAAGGCCCUUUA  
>N13  
AAUAAAAAAGAUCAAAGAGCUAAUAAGUGGUGGUCAGCAU  
>N14  
CUGUCCUACUACUGCCCCCCCACCAUCGUAUCAUAGAAAA  
>N15  
AAUAAGAAAAGGUGUCAGAUUGAUGGUGGAUAAUAAAGU  
>N16  
AUCAGAAGCUGAAAUCACACCACAAGUAUCCCACUAGCUCC  
>N17  
UUAUUUAUAAAAAGUAAUUGUUACUGGUGCUUGAUUACA  
>N18  
UUUGCAGAAGCAAGCUCAGUCUCCUGAGAGUUCACGCUGAG  
>N19  
CCAUCAGACGAGAGAGCUUACUAAUUAGAGAGCCUUCUGCU  
>N20  
CCUGCCAGGAUGUGCUACCAAGGCUGUGCUCAACUGAACA  
>N21  
GCAGACACUGCCAAAGGCAGCUGGAGCCCUACUAAGUGGAA  
>N22  
CAUUGGUGCCUCAGACGUAAACAGUCUGUGGGAAGUAUGAA  
>N23  
GCAACAUUCCCUGCUGGAGGCUCCAGGAUCCUAAGGGACAC  
>N24  
ACCUGAUCGAUAGGGAGGAAACACAUCAACCCUACCCCA  
>N25  
GGUCCCGGAGAUUCCUUGUCAGCCACCCUACCCUACUUGA  
>N26  
UGCCCACAUGUGCACGCACACACACUCAUACCCGAACACAC  
>N27  
UAUUGAAAUUCUAUCUCACCUCUAGUCAGAAUGGCAAUCAUU  
>N28  
GCAGAGAAGGGAGCCACGCACACUGUGGGUUGGAAUGUAAA  
>N29

UUUGCUCUGACACCACGAUCCACUGCAUCCCUCCUAAAAC  
>N30  
UCUAAGCCAAAUGAGCCCCAACCUCUUUAAGUAGAUUCUU  
>N31  
CAAGGUGAUCUAACAGAAUUCUAUAGGGAGAAAGUCAGGGU  
>N32  
AGGUAUAGCUCUUUCUCUGCUUGUGACUCCUGGCUC  
>N33  
UGCCACAUGAACACGUAUGCCAAUGGACUCUGCUCUCCGUGU  
>N34  
UGCAGAGAAAUGGAUUAAAUCUAGCUUGGUGUGGAUCACUU  
>N35  
UGUUUAUUCAUUUGGCUAUUCCAUUGUCCUGUACCAUCAA  
>N36  
UCUUUCUCAGUUUGUUGGAGCAUCUCAGCCAGACAAGACGC  
>N37  
CUGUCCAAAGUGUUCUAUUCUUUAACACAUCAACGUUGUU  
>N38  
AUUGAUCUUUUUAUGCCAUUCUAACUAAGUCAGAGCAGACU  
>N39  
AUUCAGGAGGUCUCAGAACAAGGCACAAAUGAACAUGUUC  
>N40  
UUUUUAAGGCUUUAUUGUCUCUAAGACCUGCAACCAAAAA  
>N41  
GCUUGGGGAGGUGAUUGUGUCACAAGGGCAGAGUUGUAGAG  
>N42  
CAUUUGGAGAAUAAAAGUUAUUAUUACAAAGAGUCUUCAUG  
>N43  
CUUUCUCACUUCUAUAGCUACAAGAAGUAAGCUUCUGUGAU  
>N44  
UCACAGCUGUAACCCCCCCCCCAAGUACUAGGAUCAGUU  
>N45  
GGUCCUAGUCUAAAUUGUGCUUUCUGCAUUUGUCACAGAA  
>N46  
AUCACUAGCAUCCCCUUCUCUGGGGCAUCAAGCCUCCACA  
>N47  
GGACCAAGUGCAUUCUCCUCCAAUGAGGCCAGAAAAGGCAA  
>N48  
AAACAGACUUUUUUUAUAGCCAAGUUUUUUUUUUUUUUUU  
>N49  
CUUCUAUCUUUCCUUUGCCUCAGAUUAUCAUCUUGGUUUGA  
>N50  
UACAUUUUUUUUCUGACUAGCUGCAUGACCACUUUGCUUGU  
>N51  
GAUUAUGGUUUACCACUCCUCAUCUCCUCCAGAUUCUCCC  
>N52  
CAUCUCCUCCUGUCCAACUCAUGCCUUAUAUGGUCUCUC  
>N53

CAGACACAUAUUUACACAUAACACACACACACACUUUAUUUU  
>N54  
AUAUUCACAAAACUAGAAAACAUGAUUAAGAGCAAACGU  
>N55  
CCAGUAAGGUAAAAAAUACCCAAAGAAAGCAAUGUCAUCA  
>N56  
UGUAAGUGGCUGCACAACUUCACUCUUUUUCUGAUUUUAUC  
>N57  
AAUGAGGUUUGACUUGAUUCUAUUUUAGGUGCUUGUUUG  
>N58  
UUACAUGCAUUGCAGAUUUAUGGGUAGCUUGAAUGUAAGC  
>N59  
CUUGAGCAAAAUUUAUAGAUCCUUGAAGUUGCAAAGUAGAC  
>N60  
AUCGGUCCUCAUUCGCUAACUAUAGUUUUUUCCUAAAAG  
>N61  
AGACAAGAACUCCUGUUGAUCCAUAUAUGUGCCAAACCUCA  
>N62  
GAGCUGUCAAGGGCACACAUCUGAGAUACAUGAAUGCUGAG  
>N63  
UAAGACAACAACAGAGUCUUCUUAGCGCAUCUUUGUGGUUU  
>N64  
UGUCAGAAGAAUACCAUGCCCAUUUCUCAUUUGUCAUUUC  
>N65  
CUCUUAUGACUACUAUUUCAUCUCUCUUCUAUGAGGUCAAUU  
>N66  
CUUAUCAAAAGUCUAAAGUUAUCUUGGUAUUUGUAUUUCUUGG  
>N67  
AUAAUUGGAAGAUUAUGAAACACUUUGUCAACCCACUAAA  
>N68  
AUGACAAUGUCCUCCUAUUUCUGUGUUAUACCUGCUUGAAG  
>N69  
GGCUUGUGAGUCUUUGGGGGCAUUUUCUAAUUAUGGGAGU  
>N70  
CGAGGGAGACUACCUCUUCACAGGGCACUCAUAAGGUGUU  
>N71  
GCCUUUACGUCAGUACCAGCCAUGUGGAAUGCUCUACAGGU  
>N72  
ACCUCGAGGAAGGGGCACAAACACUGGAACUGUUUGCCAUA  
>N73  
GGAACACAGGUCCAAGGCUGUGUUUCAUUCACAAUUAUUC  
>N74  
GGAAACACCCUUCUUCAGUACCCACCCUAGAAUGAACAAGA  
>N75  
AUAGAGUUAUGCAAAAUUUUCUCUUGGAAUAUUCUUUUCUU  
>N76  
UAGUGACAAUAGGCACAGAACAGUGGCAGCAGAGAAACAGU  
>N77

AUGUUAAGGACUGAAGAAUUCUGACAUUCUAUGUGUUCUGU  
>N78  
CUUGAAGUGGAAACUUAAGCUUCUGUGGAAAAGGUGUUGG  
>N79  
GAAUAUUUCACUGAAGCAGACACAGGAAAAAGAAUGUUCUG  
>N80  
AAAAACUUCUGGUGGUGUGCUGUGGCUUCUUGCUGCUUCU  
>N81  
UAUAAAAAGAACUCAACAGACAGUGGGAAGCAGAGCUUGGC  
>N82  
CUCCAAAGAAUCCUUCUAAAAGGUCCAGUUCACCAUAUC  
>N83  
AGAGUAAAGCGGCAUUAUUAGGCACUACAACCUCCAAC  
>N84  
AAACAAUGAUAGCAUGUAUUCUCAAGGACACAGUGAUUUUU  
>N85  
UUAAAUAACAUGCUUGAGUCUGAGGUAAGAGAGGGCCUCC  
>N86  
UUACUCUGAGAGUCCACUUUCAAAGCUUAGACAGCAAU  
>N87  
GCACAGACUGUCUCUCCUGUCACAGGUAUGUAUGUUCAUGU  
>N88  
GGAUCAUGAGUUACCUCUUUCUUUCUCUCUCUGCAAGGCUA  
>N89  
AGAGCUUCUCUCAAUUCUUCCCCUCUCCCAUAGCUAUUUC  
>N90  
AUUUUUUCUAAUACUUCAUCAACUCUCAAGGAGAUGGC  
>N91  
UUGCAUUUUCUCCCAUGUUAACCUUUGAAAACACCUGUAGGU  
>N92  
GUCUAAAGCCAUACCAUCUACACAAACAUGUAGAAGUUUGA  
>N93  
GAUCCAGGGGGCAUCCCCAUCGUGCACACAGCCUCCCCGAG  
>N94  
CCAUGUCCUCUAUUCCAUAGCCUGAAAACACAGCCAGUAGG  
>N95  
UUUGAAAUCCUUGUUCAUUCUUCUAUAAUCAGUCUGGCAC  
>N96  
CUCAUGUACAUGGCGUAUUUCAGUUUUGUCACAAAUAUUGA  
>N97  
CUACUUAUAUAAUGUAAGAGUCACGUAAUUGAGGAUGGUUU  
>N98  
UGUGAGGCCAGAGAAAAGGACCUUAGGCAUCAUUUCACAGG  
>N99  
CAGCAAGCAGCCAUCUCUCUCUCUCUCUCUCUCUCUCUCUC  
>N100  
CAAAAAGAACAUAUAAACCGAUUUACACUAUAUAUAUAU  
>N101

UCUCUUGGCAAUCCUCCUACCCUAGCUGCCAAGUAUUUGAC  
>N102  
UUUAACUAAUAUACUGGAAACAUA AAAAUUUUAUUAUACC  
>N103  
GCACUUCUUAAUCUCUUUUUGCCUUAUUGGUUGAUUAGG  
>N104  
AUUUCUCACUGAAUCAAGCCCUUACUGGUUGGUUACAAUGG  
>N105  
CCCAAUGCUGACAUAACAUGCUUAUGCUGUCUCCUUGGAA  
>N106  
UAGCACAGUAGUGUCAUCUGCAGCCAACUUGCUAUUAACCC  
>N107  
UGCACCUGAACUUGUUGCUCUUUUAAACAGCAACAGUGCCC  
>N108  
CAGCAGUGUCCAGUGCAUUCAUUGCCCCAUGAGCAGCAUC  
>N109  
UGGAUACAGAUGUCCUUUGCCUACAGAAGCUUUGCAAUUU  
>N110  
AAGAAAGAAAUUCACUUGGACUUGAGCUUUGUACAAGGACA  
>N111  
GUAGGUGUGGGUUCAUUUCUGGGUCUCAAUUCUAUUUA  
>N112  
GGAUAUCAGUCUGGCAGUUCUCAGAAAAUUGGACACGAGG  
>N113  
UUGCAGCCCCAUAGGAGGAGCAACAAUAUAAACCAACCAGU  
>N114  
ACACAUGAAGGGACUCAUGUCUCCAGCUGCAUAUGUAGCAG  
>N115  
AGGGUGGCCAUGUCAGUCAUCAUUGGGAGGAGAGGCCCUUG  
>N116  
GUCCUGUGAAGGUUCUGUGCCUCAGUGUAGGAGAAUGCCAU  
>N117  
ACAAAUGAAGAAUGAGCCAUCUUUAUACACAGACUCAGUCUU  
>N118  
AGCAGAUCAUUACUGAAUAAACACUAGGAGAAGGCACUUGAA  
>N119  
GAUUCUUUCCUUAAGA UUGCUUUAAUUUUAAUUAUUUGUA  
>N120  
ACUCAGGUCUCCUUUGAGAGCAGAACUCAGUCUUAUGUGCU
